# Supplementary material for: Shared gene-network signatures between the human heavy metal proteome and neurological disorders and cancer types
Source: Royal Society of Chemistry journal article supplement (doi:10.1039/c8mt00271a), 2018-01-01
Supplement: c8mt00271a1.pdf [file c8mt00271a1.pdf]

# SUPPLEMENTARY MATERIAL

## Shared gene-network signatures between human heavy metal proteome, neurological disorders and cancer types.

Christos T. Chasapis\*

---

*Institute of Chemical Engineering Sciences, Foundation for Research & Technology - Hellas (FORTH/ICE-HT), Patras, 26504, Greece*

### Contents:

**Figure S1:** The common gene network signature between heavy metal proteome and neurodiseases and cancers.

**Table S1:** Al-, Cd-, Hg-, and Pb- binding domains extracted from Pfam library.

**Table S2:** The identified Al-, Cd-, Hg-, and Pb- binding proteins.

**Table S3:** The KEGG enrichment analysis of all identified enzymes with potential heavy metal binding domains.

**Table S4:** 163 and 418 genetic loci associated with neurological disorders and cancer risk retrieved by genome-wide association study (GWAS) catalog and Cancer Genome Atlas (TCGA) repository respectively.

**Table S5:** The list of the shared neighboring genes between heavy metal proteome and neurological disorders and cancers and their description.

**Table S6:** Gene nodes of the common gene network signature between heavy metal proteome and neurodiseases.

**Table S7:** Gene nodes of the common gene network signature between heavy metal proteome and cancer types.

**Table S8:** The list of metalloproteins identified in each of heavy metal proteome.

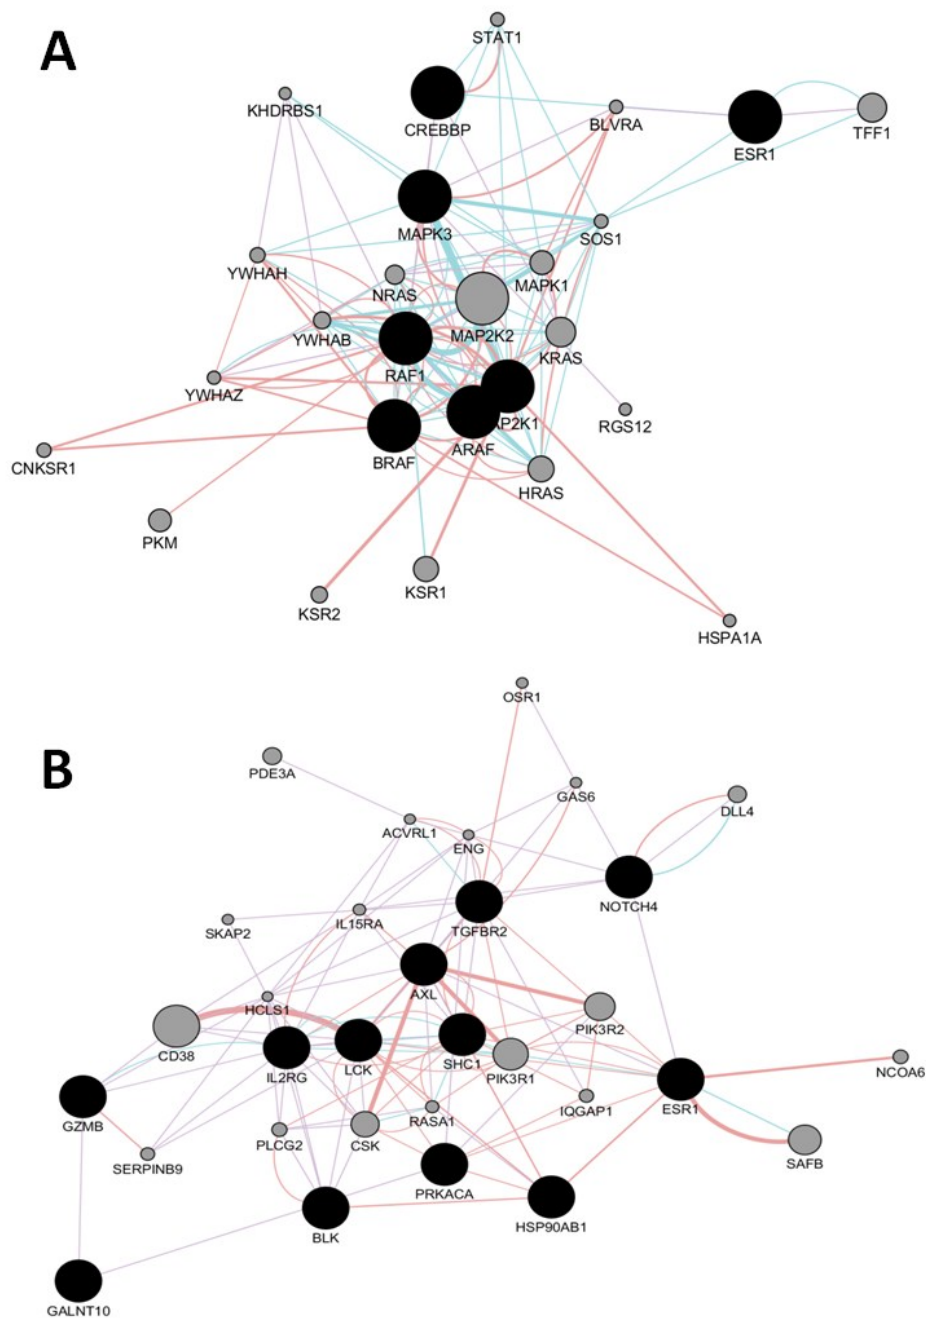

**Figure S1:** A) The common gene network signature between heavy metal proteome and 4 neurodiseases B) The common gene network signature between heavy metalloproteome and 12 cancer types. The two networks and the pathways were obtained by Cytoscape's gene MANIA plug-in. Black dots represent common neighboring genes between heavy metal proteome and neurodiseases (A) and cancers (B). Genes in grey dots represent networking

genes retrieved by geneMANIA where smaller dots represent weaker connectivity/association. Colored connecting line between two genes indicates interactions between them (red-physical; purple-co-expression) and blue lines are part of pathways.
