# Supplementary material for: Shared gene-network signatures between the human heavy metal proteome and neurological disorders and cancer types
Source: Royal Society of Chemistry journal article supplement (doi:10.1039/c8mt00271a), 2018-01-01
Supplement: c8mt00271a3.xlsx [file c8mt00271a3.xlsx]

## Sheet: Pfam_Al
PF06838
PF03649
PF00266
PF00733
PF01053
PF01544
PF04616
PF06081
PF11744
PF13241
PF13515
PF13537
PF14824
PF00069
PF00071
PF00134
PF00270
PF00271
PF00300
PF00405
PF00702
PF01591
PF02984
PF03031
PF04262
PF05822
PF12738
PF07172
PF00004
PF00006
PF00011
PF00017
PF00025
PF00076
PF00091
PF00102
PF00118
PF00129
PF00130
PF00142
PF00148
PF00162
PF00166
PF00168
PF00169
PF00225
PF00231
PF00245
PF00306
PF00334
PF00349
PF00365
PF00433
PF00448
PF00498
PF00503
PF00564
PF00566
PF00615
PF00616
PF00620
PF00638
PF00689
PF00690
PF00778
PF00871
PF00989
PF01261
PF01293
PF01412
PF01833
PF01869
PF02263
PF02359
PF02374
PF02792
PF02827
PF02841
PF02874
PF02881
PF02933
PF02978
PF03496
PF03545
PF03702
PF03727
PF03767
PF03953
PF05970
PF06623
PF06872
PF07654
PF07686
PF07714
PF08337
PF08369
PF08761
PF08833
PF09119
PF09291
PF09336
PF09405
PF09430
PF10609
PF11648
PF12423
PF12473
PF12796
PF13716
PF13931
PF16646
PF16739

## Sheet: Pfam_Cd
PF00004
PF00005
PF00006
PF00009
PF00011
PF00014
PF00017
PF00018
PF00020
PF00022
PF00024
PF00025
PF00026
PF00027
PF00031
PF00032
PF00033
PF00035
PF00036
PF00041
PF00042
PF00043
PF00046
PF00051
PF00052
PF00053
PF00055
PF00056
PF00057
PF00058
PF00061
PF00062
PF00068
PF00069
PF00071
PF00072
PF00073
PF00074
PF00075
PF00076
PF00077
PF00078
PF00080
PF00083
PF00084
PF00085
PF00089
PF00090
PF00092
PF00093
PF00094
PF00100
PF00107
PF00112
PF00113
PF00115
PF00116
PF00124
PF00125
PF00127
PF00128
PF00129
PF00130
PF00131
PF00134
PF00139
PF00144
PF00150
PF00160
PF00167
PF00168
PF00169
PF00171
PF00172
PF00180
PF00181
PF00183
PF00184
PF00186
PF00188
PF00200
PF00202
PF00207
PF00210
PF00216
PF00218
PF00220
PF00225
PF00229
PF00230
PF00237
PF00238
PF00240
PF00244
PF00246
PF00252
PF00254
PF00255
PF00258
PF00267
PF00271
PF00276
PF00281
PF00295
PF00297
PF00298
PF00301
PF00307
PF00327
PF00328
PF00331
PF00347
PF00354
PF00355
PF00357
PF00358
PF00367
PF00377
PF00381
PF00384
PF00386
PF00394
PF00395
PF00400
PF00403
PF00404
PF00408
PF00431
PF00433
PF00436
PF00439
PF00448
PF00450
PF00452
PF00457
PF00462
PF00466
PF00467
PF00481
PF00496
PF00497
PF00505
PF00510
PF00512
PF00514
PF00516
PF00517
PF00520
PF00525
PF00531
PF00540
PF00548
PF00551
PF00552
PF00557
PF00561
PF00572
PF00573
PF00576
PF00579
PF00581
PF00593
PF00595
PF00607
PF00626
PF00629
PF00636
PF00652
PF00658
PF00665
PF00669
PF00673
PF00680
PF00696
PF00700
PF00703
PF00704
PF00708
PF00722
PF00732
PF00734
PF00746
PF00753
PF00754
PF00756
PF00757
PF00762
PF00788
PF00793
PF00801
PF00808
PF00809
PF00814
PF00827
PF00828
PF00831
PF00832
PF00840
PF00854
PF00869
PF00870
PF00873
PF00882
PF00887
PF00903
PF00905
PF00910
PF00929
PF00933
PF00935
PF00948
PF01003
PF01004
PF01007
PF01022
PF01023
PF01030
PF01039
PF01040
PF01048
PF01070
PF01116
PF01119
PF01123
PF01128
PF01138
PF01145
PF01152
PF01157
PF01198
PF01215
PF01220
PF01244
PF01246
PF01248
PF01255
PF01259
PF01261
PF01280
PF01297
PF01301
PF01321
PF01322
PF01323
PF01325
PF01327
PF01333
PF01341
PF01353
PF01382
PF01386
PF01390
PF01391
PF01400
PF01419
PF01421
PF01423
PF01425
PF01428
PF01436
PF01447
PF01451
PF01452
PF01453
PF01468
PF01475
PF01476
PF01477
PF01497
PF01502
PF01522
PF01545
PF01562
PF01568
PF01590
PF01655
PF01674
PF01699
PF01717
PF01735
PF01742
PF01747
PF01750
PF01752
PF01765
PF01775
PF01780
PF01797
PF01804
PF01821
PF01823
PF01826
PF01835
PF01839
PF01896
PF01907
PF01926
PF02013
PF02018
PF02022
PF02046
PF02068
PF02080
PF02096
PF02126
PF02135
PF02137
PF02170
PF02171
PF02172
PF02174
PF02177
PF02180
PF02197
PF02244
PF02246
PF02254
PF02284
PF02285
PF02295
PF02297
PF02310
PF02333
PF02368
PF02374
PF02378
PF02429
PF02430
PF02518
PF02529
PF02535
PF02574
PF02585
PF02597
PF02607
PF02618
PF02630
PF02678
PF02687
PF02742
PF02790
PF02798
PF02813
PF02818
PF02821
PF02832
PF02837
PF02838
PF02866
PF02868
PF02874
PF02876
PF02878
PF02879
PF02880
PF02881
PF02900
PF02931
PF02935
PF02936
PF02937
PF02978
PF02984
PF02991
PF03014
PF03079
PF03114
PF03143
PF03144
PF03260
PF03271
PF03349
PF03357
PF03368
PF03401
PF03413
PF03422
PF03423
PF03424
PF03458
PF03494
PF03513
PF03515
PF03575
PF03717
PF03725
PF03734
PF03742
PF03750
PF03781
PF03826
PF03902
PF03946
PF03947
PF03952
PF03967
PF04023
PF04043
PF04082
PF04092
PF04137
PF04198
PF04199
PF04212
PF04542
PF04545
PF04582
PF04729
PF04777
PF04820
PF04851
PF05009
PF05115
PF05199
PF05203
PF05204
PF05207
PF05223
PF05239
PF05264
PF05375
PF05392
PF05522
PF05551
PF05697
PF05698
PF05986
PF06001
PF06119
PF06368
PF06397
PF06436
PF06438
PF06617
PF06623
PF06741
PF06778
PF07145
PF07238
PF07422
PF07472
PF07474
PF07504
PF07523
PF07555
PF07645
PF07647
PF07652
PF07654
PF07677
PF07678
PF07679
PF07686
PF07690
PF07703
PF07710
PF07714
PF07715
PF07716
PF07732
PF07813
PF07885
PF07951
PF07952
PF07953
PF07966
PF07969
PF07992
PF08007
PF08041
PF08205
PF08214
PF08240
PF08246
PF08267
PF08332
PF08441
PF08450
PF08453
PF08562
PF08563
PF08676
PF08742
PF08762
PF08802
PF09000
PF09011
PF09014
PF09030
PF09042
PF09199
PF09223
PF09291
PF09336
PF09361
PF09625
PF10099
PF10391
PF10435
PF10469
PF10470
PF10515
PF11492
PF11570
PF11587
PF12010
PF12063
PF12106
PF12125
PF12265
PF12285
PF12662
PF12680
PF12704
PF12924
PF12925
PF12937
PF12947
PF13098
PF13167
PF13180
PF13192
PF13199
PF13306
PF13363
PF13364
PF13416
PF13442
PF13458
PF13473
PF13499
PF13519
PF13640
PF13793
PF13801
PF13833
PF13931
PF13995
PF14306
PF14438
PF14542
PF14572
PF14693
PF14716
PF14791
PF14792
PF14843
PF14894
PF15494
PF15511
PF15515
PF15826
PF15910
PF16010
PF16164
PF16360
PF16517
PF16533
PF16541
PF16639
PF16738
PF16886
PF16906
PF16916
PF16918
PF16919
PF16990
PF17144
PF17209
PF17573
PF01005
PF01002
PF01350
PF01349
PF00972
PF01570
PF01728
PF00949
PF06815
PF06817
PF00098
PF01759
PF10563
PF00122
PF00376
PF00529
PF00689
PF00690
PF00702
PF01814
PF02321
PF02579
PF04945
PF08282
PF09278
PF11604
PF12156
PF13246
PF13411
PF13437
PF13533
PF16576
PF02238
PF00475

## Sheet: Pfam_Hg
PF00001
PF00004
PF00005
PF00010
PF00014
PF00023
PF00025
PF00027
PF00028
PF00036
PF00041
PF00042
PF00047
PF00051
PF00059
PF00063
PF00067
PF00069
PF00072
PF00074
PF00075
PF00082
PF00089
PF00102
PF00104
PF00105
PF00108
PF00112
PF00117
PF00127
PF00128
PF00129
PF00133
PF00135
PF00136
PF00144
PF00149
PF00151
PF00168
PF00169
PF00176
PF00186
PF00194
PF00196
PF00210
PF00230
PF00232
PF00240
PF00246
PF00268
PF00270
PF00271
PF00293
PF00298
PF00301
PF00307
PF00326
PF00328
PF00337
PF00341
PF00348
PF00355
PF00356
PF00375
PF00376
PF00378
PF00384
PF00394
PF00397
PF00403
PF00404
PF00435
PF00463
PF00475
PF00483
PF00490
PF00504
PF00512
PF00516
PF00517
PF00531
PF00533
PF00571
PF00578
PF00580
PF00581
PF00591
PF00594
PF00595
PF00600
PF00608
PF00612
PF00615
PF00616
PF00621
PF00625
PF00634
PF00640
PF00652
PF00664
PF00677
PF00680
PF00685
PF00687
PF00692
PF00696
PF00705
PF00724
PF00725
PF00728
PF00729
PF00730
PF00732
PF00747
PF00753
PF00756
PF00757
PF00768
PF00771
PF00775
PF00778
PF00787
PF00788
PF00791
PF00795
PF00891
PF00903
PF00910
PF00930
PF00936
PF00940
PF00943
PF00944
PF00958
PF00989
PF01023
PF01028
PF01030
PF01042
PF01049
PF01051
PF01068
PF01082
PF01083
PF01118
PF01121
PF01131
PF01140
PF01141
PF01144
PF01182
PF01221
PF01230
PF01266
PF01270
PF01306
PF01353
PF01370
PF01381
PF01396
PF01397
PF01398
PF01400
PF01434
PF01436
PF01458
PF01488
PF01510
PF01521
PF01522
PF01545
PF01563
PF01568
PF01576
PF01584
PF01588
PF01589
PF01593
PF01618
PF01627
PF01650
PF01661
PF01728
PF01742
PF01751
PF01758
PF01765
PF01806
PF01833
PF01922
PF01926
PF01968
PF01979
PF02023
PF02028
PF02050
PF02086
PF02093
PF02133
PF02156
PF02214
PF02219
PF02233
PF02244
PF02269
PF02278
PF02321
PF02367
PF02373
PF02446
PF02472
PF02518
PF02537
PF02538
PF02540
PF02568
PF02624
PF02664
PF02732
PF02736
PF02737
PF02747
PF02774
PF02803
PF02806
PF02852
PF02884
PF02885
PF02895
PF02919
PF02926
PF02931
PF02959
PF03051
PF03071
PF03091
PF03104
PF03128
PF03131
PF03243
PF03273
PF03414
PF03496
PF03534
PF03551
PF03576
PF03618
PF03643
PF03664
PF03712
PF03783
PF03800
PF03801
PF03834
PF03836
PF03936
PF03943
PF03946
PF03984
PF03987
PF04022
PF04049
PF04073
PF04074
PF04190
PF04356
PF04423
PF04424
PF04433
PF04444
PF04451
PF04461
PF04675
PF04679
PF04719
PF04768
PF04851
PF04880
PF05093
PF05133
PF05160
PF05199
PF05257
PF05378
PF05416
PF05550
PF05573
PF05903
PF05922
PF06109
PF06397
PF06478
PF06480
PF06617
PF06623
PF07194
PF07455
PF07522
PF07650
PF07654
PF07679
PF07682
PF07686
PF07689
PF07714
PF07728
PF07731
PF07732
PF07804
PF07883
PF07884
PF07920
PF07938
PF07943
PF07951
PF07952
PF07953
PF07992
PF08124
PF08150
PF08151
PF08165
PF08205
PF08214
PF08241
PF08246
PF08264
PF08272
PF08286
PF08383
PF08405
PF08450
PF08460
PF08501
PF08674
PF08758
PF08764
PF08833
PF08882
PF09103
PF09104
PF09121
PF09151
PF09169
PF09223
PF09278
PF09291
PF09396
PF09485
PF09492
PF09734
PF09818
PF10413
PF10419
PF10429
PF10591
PF11107
PF11264
PF11401
PF11431
PF11531
PF11590
PF11617
PF11646
PF11648
PF11851
PF12052
PF12146
PF12255
PF12256
PF12324
PF12379
PF12419
PF12453
PF12468
PF12497
PF12567
PF12706
PF12769
PF12796
PF13012
PF13181
PF13302
PF13304
PF13361
PF13380
PF13411
PF13416
PF13476
PF13545
PF13603
PF13607
PF13657
PF13806
PF13895
PF14370
PF14700
PF14716
PF14779
PF14795
PF14883
PF15489
PF15951
PF16010
PF16348
PF16422
PF16423
PF16523
PF16646
PF16739
PF16843
PF16864
PF16903
PF16916
PF16990
PF16251
PF11501
PF09401
PF06471
PF06460
PF12124
PF08716
PF08717
PF08710
PF05409
PF11633
PF08715
PF00665
PF00077
PF00078
PF00098
F11431
PF03203
PF00122
PF00202
PF00488
PF00702
PF01814
PF02163
PF02683
PF04945
PF05192
PF06580
PF07690
PF08534
PF12156
PF13905

## Sheet: Pfam_Pb
PF00002
PF00009
PF00013
PF00015
PF00017
PF00025
PF00069
PF00069
PF00072
PF00130
PF00140
PF00140
PF00168
PF00168
PF00268
PF00293
PF00376
PF00433
PF00490
PF00540
PF00552
PF00575
PF00593
PF00595
PF00607
PF00623
PF00734
PF00762
PF00788
PF00793
PF00887
PF00889
PF00973
PF01000
PF01192
PF01193
PF01237
PF01316
PF01339
PF01364
PF01817
PF01843
PF02017
PF02022
PF02074
PF02189
PF02863
PF03118
PF03143
PF03144
PF03175
PF03328
PF03372
PF03372
PF03664
PF03785
PF04539
PF04539
PF04542
PF04542
PF04545
PF04545
PF04561
PF04563
PF04565
PF04983
PF04997
PF05000
PF05026
PF05435
PF05641
PF05822
PF06058
PF06090
PF06652
PF07675
PF07714
PF07715
PF09230
PF09278
PF10150
PF10365
PF10385
PF11628
PF12111
PF12235
PF13499
PF13499
PF13499
PF14779
PF14791
PF04998
PF04998
PF04998
PF04998
PF04998
PF04998
PF04998
PF04998
PF04998
