# Supplementary material for: Shared gene-network signatures between the human heavy metal proteome and neurological disorders and cancer types
Source: Royal Society of Chemistry journal article supplement (doi:10.1039/c8mt00271a), 2018-01-01
Supplement: c8mt00271a4.xlsx [file c8mt00271a4.xlsx]

## Sheet: Al_proteins
Entry	Gene names (primary )	Protein names
P10911	MCF2	Proto-oncogene DBL (Proto-oncogene MCF-2) [Cleaved into: MCF2-transforming protein; DBL-transforming protein]
A0A1B0GTL5	RAB11FIP5	Rab11 family-interacting protein 5
A0A0A0MSJ4	CLNK	Cytokine-dependent hematopoietic cell linker
C9JDH9	STK25	Serine/threonine-protein kinase 25 (Fragment)
F5GZI4	TBK1	Serine/threonine-protein kinase TBK1 (Fragment)
C9JPP4	GNAI1	Guanine nucleotide-binding protein G(i) subunit alpha-1 (Fragment)
P01701	IGLV1-51	Immunoglobulin lambda variable 1-51 (Ig lambda chain V-I region BL2) (Ig lambda chain V-I region EPS) (Ig lambda chain V-I region NEW) (Ig lambda chain V-I region NIG-64)
A0A075B6V5	TRAV36DV7	T cell receptor alpha variable 36/delta variable 7
M0R0P9	AKT2	Non-specific serine/threonine protein kinase (EC 2.7.11.1)
E9PRY3	BRSK2	Serine/threonine-protein kinase BRSK2 (Fragment)
E9PCM6	ARHGAP4	Rho GTPase-activating protein 4
Q5W015	PFKFB3	6-phosphofructo-2-kinase/fructose-2,6-bisphosphatase 3
Q8NB66	UNC13C	Protein unc-13 homolog C (Munc13-3)
P01611	IGKV1D-12	Immunoglobulin kappa variable 1D-12 (Ig kappa chain V-I region Wes)
G5E9C8	SOS1	Son of sevenless homolog 1 (Son of sevenless homolog 1 (Drosophila), isoform CRA_d)
A0A1B0GVC3	DIRAS2	GTP-binding protein Di-Ras2 (Fragment)
B1AKP7	TARDBP	TAR DNA-binding protein 43
O43390	HNRNPR	Heterogeneous nuclear ribonucleoprotein R (hnRNP R)
Q15056	EIF4H	Eukaryotic translation initiation factor 4H (eIF-4H) (Williams-Beuren syndrome chromosomal region 1 protein)
E5RJP4	GFPT2	Glutamine--fructose-6-phosphate aminotransferase [isomerizing] 2 (Fragment)
P04430	IGKV1-16	Immunoglobulin kappa variable 1-16 (Ig kappa chain V-I region BAN)
F2Z2J2	NME6	Nucleoside diphosphate kinase 6
P01763	IGHV3-48	Immunoglobulin heavy variable 3-48 (Ig heavy chain V-III region WEA)
Q92835	INPP5D	Phosphatidylinositol 3,4,5-trisphosphate 5-phosphatase 1 (EC 3.1.3.86) (Inositol polyphosphate-5-phosphatase of 145 kDa) (SIP-145) (SH2 domain-containing inositol 5'-phosphatase 1) (SH2 domain-containing inositol phosphatase 1) (SHIP-1) (p150Ship) (hp51CN)
K7EJE8	LONP1	Lon protease homolog, mitochondrial (EC 3.4.21.53) (Lon protease-like protein) (LONP) (Mitochondrial ATP-dependent protease Lon) (Serine protease 15)
Q9H0F7	ARL6	ADP-ribosylation factor-like protein 6 (Bardet-Biedl syndrome 3 protein)
A0A0C4DH90	IGKV3OR2-268	Immunoglobulin kappa variable 3/OR2-268 (non-functional) (Fragment)
A0A140T9Y9	HLA-DPA1	HLA class II histocompatibility antigen, DP alpha 1 chain (Fragment)
H3BMQ7	NME3	Nucleoside diphosphate kinase 3 (Fragment)
Q16720	ATP2B3	Plasma membrane calcium-transporting ATPase 3 (PMCA3) (EC 3.6.3.8) (Plasma membrane calcium ATPase isoform 3) (Plasma membrane calcium pump isoform 3)
Q8WXE0	CASKIN2	Caskin-2 (CASK-interacting protein 2)
G8JLK0	OSBPL9	Oxysterol-binding protein-related protein 9
A0A087X0B4	ANK3	Ankyrin-3
A0A140T9H4	MICB	MHC class I polypeptide-related sequence B (Fragment)
O75909	CCNK	Cyclin-K
P19525	EIF2AK2	Interferon-induced, double-stranded RNA-activated protein kinase (EC 2.7.11.1) (Eukaryotic translation initiation factor 2-alpha kinase 2) (eIF-2A protein kinase 2) (Interferon-inducible RNA-dependent protein kinase) (P1/eIF-2A protein kinase) (Protein kinase RNA-activated) (PKR) (Protein kinase R) (Tyrosine-protein kinase EIF2AK2) (EC 2.7.10.2) (p68 kinase)
Q70T24	TRPC7	Short transient receptor potential channel 7 (Transient receptor potential channel 7)
K7EQ00	KATNAL2	Katanin p60 ATPase-containing subunit A-like 2
J3QQS3	STRADA	STE20-related kinase adapter protein alpha
G3V4E1	DGKA	Diacylglycerol kinase (DAG kinase) (EC 2.7.1.107) (Fragment)
A0A0G2JQ08	POTEB3	POTE ankyrin domain family member B3
H7C3Z8	MST1R	Macrophage-stimulating protein receptor (Fragment)
H7BZI8	PAXIP1	PAX-interacting protein 1 (Fragment)
A0A075B6I3	IGLV11-55	Immunoglobulin lambda variable 11-55 (non-functional) (Fragment)
O15169	AXIN1	Axin-1 (Axis inhibition protein 1) (hAxin)
Q8N427	NME8	Thioredoxin domain-containing protein 3 (NM23-H8) (NME/NM23 family member 8) (Spermatid-specific thioredoxin-2) (Sptrx-2)
B7Z2N1	RGS6	Regulator of G-protein-signaling 6 (cDNA FLJ51839, highly similar to Regulator of G-protein signaling 6)
Q8IWB6	TEX14	Inactive serine/threonine-protein kinase TEX14 (Protein kinase-like protein SgK307) (Sugen kinase 307) (Testis-expressed sequence 14) (Testis-expressed sequence 14 protein)
Q9H8H2	DDX31	Probable ATP-dependent RNA helicase DDX31 (EC 3.6.4.13) (DEAD box protein 31) (Helicain)
Q04771	ACVR1	Activin receptor type-1 (EC 2.7.11.30) (Activin receptor type I) (ACTR-I) (Activin receptor-like kinase 2) (ALK-2) (Serine/threonine-protein kinase receptor R1) (SKR1) (TGF-B superfamily receptor type I) (TSR-I)
A0A140T9C4	HLA-DMA	HLA class II histocompatibility antigen, DM alpha chain
A0A0A0MTH3	ILK	Integrin-linked protein kinase
M0QYY8	DAPK3	Death-associated protein kinase 3 (Fragment)
B1AM27	UNC13B	Protein unc-13 homolog B
Q29963	HLA-C	HLA class I histocompatibility antigen, Cw-6 alpha chain (MHC class I antigen Cw*6)
F5H3A2	PLXNC1	Plexin-C1
J3KT61	MAPK7	Mitogen-activated protein kinase 7 (Fragment)
A0A0C4DGA4	TIGIT	T-cell immunoreceptor with Ig and ITIM domains
Q8N568	DCLK2	Serine/threonine-protein kinase DCLK2 (EC 2.7.11.1) (CaMK-like CREB regulatory kinase 2) (CL2) (CLICK-II) (CLICK2) (Doublecortin domain-containing protein 3B) (Doublecortin-like and CAM kinase-like 2) (Doublecortin-like kinase 2)
A0A140T9R6	HLA-DQB1	HLA class II histocompatibility antigen, DQ beta 1 chain
H3BU05	MYO9A	Unconventional myosin-IXa (Fragment)
C9JJQ8	TUBA4A	Tubulin alpha chain (Fragment)
A0A0B4J1Y8	IGLV9-49	Immunoglobulin lambda variable 9-49
P15313	ATP6V1B1	V-type proton ATPase subunit B, kidney isoform (V-ATPase subunit B 1) (Endomembrane proton pump 58 kDa subunit) (Vacuolar proton pump subunit B 1)
Q5TCX8	MAP3K21	Mitogen-activated protein kinase kinase kinase 21 (EC 2.7.11.25) (Mitogen-activated protein kinase kinase kinase MLK4) (Mixed lineage kinase 4)
Q5JUB8	PRUNE2	Protein prune homolog 2
F8VWX7	CDK4	Cyclin-dependent kinase 4 (Fragment)
Q8IWZ3	ANKHD1	Ankyrin repeat and KH domain-containing protein 1 (HIV-1 Vpr-binding ankyrin repeat protein) (Multiple ankyrin repeats single KH domain) (hMASK)
P30461	HLA-B	HLA class I histocompatibility antigen, B-13 alpha chain (MHC class I antigen B*13)
A0A0D9SF20	PTBP1	Polypyrimidine tract binding protein 1, isoform CRA_e (Polypyrimidine tract-binding protein 1)
H7C452	DDX18	ATP-dependent RNA helicase DDX18 (Fragment)
Q6DU44	HLA-E	HLA class I histocompatibility antigen, alpha chain E (HLA-E protein) (MHC class I antigen) (MHC class Ib antigen) (Major histocompatibility complex, class I, E)
H7BZB4	C2CD3	C2 domain-containing protein 3 (Fragment)
H3BNE4	SPG7	Paraplegin (Fragment)
P01116	KRAS	GTPase KRas (K-Ras 2) (Ki-Ras) (c-K-ras) (c-Ki-ras) [Cleaved into: GTPase KRas, N-terminally processed]
Q95460	MR1	Major histocompatibility complex class I-related gene protein (MHC class I-related gene protein) (Class I histocompatibility antigen-like protein)
J3KNN5	DDX41	Probable ATP-dependent RNA helicase DDX41 (Fragment)
P49619	DGKG	Diacylglycerol kinase gamma (DAG kinase gamma) (EC 2.7.1.107) (Diglyceride kinase gamma) (DGK-gamma)
G3V5F8	PRKCH	Protein kinase C eta type (Fragment)
A1A4Z5	TRPC7	Short transient receptor potential channel 7 (TRPC7 protein)
P15882	CHN1	N-chimaerin (A-chimaerin) (Alpha-chimerin) (N-chimerin) (NC) (Rho GTPase-activating protein 2)
D6RHI0	CCNB1	G2/mitotic-specific cyclin-B1 (Fragment)
E7ES00	AXIN2	Axin-2
Q7KYR7	BTN2A1	Butyrophilin subfamily 2 member A1
Q76MJ5	ERN2	Serine/threonine-protein kinase/endoribonuclease IRE2 (Endoplasmic reticulum-to-nucleus signaling 2) (Inositol-requiring protein 2) (hIRE2p) (Ire1-beta) (IRE1b) [Includes: Serine/threonine-protein kinase (EC 2.7.11.1); Endoribonuclease (EC 3.1.26.-)]
H0YB27	PIK3R1	Phosphatidylinositol 3-kinase regulatory subunit alpha (Fragment)
F5H157	RAB35	Ras-related protein Rab-35 (Fragment)
H7BXZ5	KALRN	Kalirin (Fragment)
P60763	RAC3	Ras-related C3 botulinum toxin substrate 3 (p21-Rac3)
Q7M4L6	SHF	SH2 domain-containing adapter protein F
C9J6C5	NIFK	MKI67 FHA domain-interacting nucleolar phosphoprotein (Fragment)
H0Y5H2	CABLES2	CDK5 and ABL1 enzyme substrate 2 (Fragment)
H7C1L7	NAGK	N-acetyl-D-glucosamine kinase
P38919	EIF4A3	Eukaryotic initiation factor 4A-III (eIF-4A-III) (eIF4A-III) (EC 3.6.4.13) (ATP-dependent RNA helicase DDX48) (ATP-dependent RNA helicase eIF4A-3) (DEAD box protein 48) (Eukaryotic initiation factor 4A-like NUK-34) (Eukaryotic translation initiation factor 4A isoform 3) (Nuclear matrix protein 265) (NMP 265) (hNMP 265) [Cleaved into: Eukaryotic initiation factor 4A-III, N-terminally processed]
Q96S99	PLEKHF1	Pleckstrin homology domain-containing family F member 1 (PH domain-containing family F member 1) (Lysosome-associated apoptosis-inducing protein containing PH and FYVE domains) (Apoptosis-inducing protein) (PH and FYVE domain-containing protein 1) (Phafin-1) (Zinc finger FYVE domain-containing protein 15)
Q9NU02	ANKEF1	Ankyrin repeat and EF-hand domain-containing protein 1 (Ankyrin repeat domain-containing protein 5)
I3L0B6	DAZ2	Deleted in azoospermia protein 2
Q9UJT0	TUBE1	Tubulin epsilon chain (Epsilon-tubulin)
Q8N7Z5	ANKRD31	Putative ankyrin repeat domain-containing protein 31
B7ZLQ5	SMARCA1	Probable global transcription activator SNF2L1 (SMARCA1 protein) (SWI/SNF related, matrix associated, actin dependent regulator of chromatin, subfamily a, member 1, isoform CRA_d)
Q5SZL5	TBC1D7	TBC1 domain family member 7 (Fragment)
A8MZI4	RAB37	Ras-related protein Rab-37
Q8IXA3	CSNK1G1	Casein kinase I gamma 1 isoform (Casein kinase I isoform gamma-1) (HCG2004507, isoform CRA_d)
F2Z2G3	BOLL	Protein boule-like
F8WDQ2	ASZ1	Ankyrin repeat, SAM and basic leucine zipper domain-containing protein 1
O14979	HNRNPDL	Heterogeneous nuclear ribonucleoprotein D-like (hnRNP D-like) (hnRNP DL) (AU-rich element RNA-binding factor) (JKT41-binding protein) (Protein laAUF1)
H0YJL1	PPP1R13B	Apoptosis-stimulating of p53 protein 1 (Fragment)
A0A0G2JS06	IGLV5-39	Immunoglobulin lambda variable 5-39
P17612	PRKACA	cAMP-dependent protein kinase catalytic subunit alpha (PKA C-alpha) (EC 2.7.11.11)
F5GWR7	PTPRD	Receptor-type tyrosine-protein phosphatase delta
B7WPN9	ATP13A4	Cation-transporting ATPase (EC 3.6.3.-)
E9PS17	SCYL1	N-terminal kinase-like protein
P10316	HLA-A	HLA class I histocompatibility antigen, A-69 alpha chain (Aw-69) (HLA class I histocompatibility antigen, A-28 alpha chain) (MHC class I antigen A*69)
P50990	CCT8	T-complex protein 1 subunit theta (TCP-1-theta) (CCT-theta) (Chaperonin containing T-complex polypeptide 1 subunit 8) (Renal carcinoma antigen NY-REN-15)
A0A1C7CYZ1	MAPK15	Mitogen-activated protein kinase 15 (Fragment)
F5H1A3	TBK1	Serine/threonine-protein kinase TBK1 (Fragment)
Q7Z6G8	ANKS1B	Ankyrin repeat and sterile alpha motif domain-containing protein 1B (Amyloid-beta protein intracellular domain-associated protein 1) (AIDA-1) (E2A-PBX1-associated protein) (EB-1)
C9JCF5	LTF	Lactotransferrin (Fragment)
O95294	RASAL1	RasGAP-activating-like protein 1 (RAS protein activator like 1) (Ras GTPase-activating-like protein)
Q12979	ABR	Active breakpoint cluster region-related protein
C9K0E3	PRKCD	Protein kinase C delta type (Fragment)
K7EKT6	MAP4K1	Mitogen-activated protein kinase kinase kinase kinase 1
P48729	CSNK1A1	Casein kinase I isoform alpha (CKI-alpha) (EC 2.7.11.1) (CK1)
K7EJ64	TUBB6	Tubulin beta-6 chain
Q8TF27	AGAP11	Arf-GAP with GTPase, ANK repeat and PH domain-containing protein 11 (AGAP-11) (Centaurin-gamma-like protein KIAA1975)
H3BQR2	NUBP2	Cytosolic Fe-S cluster assembly factor NUBP2
A0A0C4DGW1	ARAP2	Arf-GAP with Rho-GAP domain, ANK repeat and PH domain-containing protein 2
A0A075B6J1	IGLV5-37	Immunoglobulin lambda variable 5-37
P84085	ARF5	ADP-ribosylation factor 5
Q92529	SHC3	SHC-transforming protein 3 (Neuronal Shc) (N-Shc) (Protein Rai) (SHC-transforming protein C) (Src homology 2 domain-containing-transforming protein C3) (SH2 domain protein C3)
A0A0A0MSJ9	RASA2	Ras GTPase-activating protein 2
A0A087X0M4	SLC4A1AP	Kanadaptin
B1ANL0	ALPL	Alkaline phosphatase, tissue-nonspecific isozyme (Fragment)
Q14CZ8	HEPACAM	Hepatocyte cell adhesion molecule (Protein hepaCAM)
F5H2B9	UACA	Uveal autoantigen with coiled-coil domains and ankyrin repeats
E9PJQ5	RAB30	Ras-related protein Rab-30 (Fragment)
E5RJB9	PABPC1	Polyadenylate-binding protein 1 (Fragment)
K7EN18	MAPK4	Mitogen-activated protein kinase 4
B5MBY4	ANKMY1	Ankyrin repeat and MYND domain containing 1, isoform CRA_a (Ankyrin repeat and MYND domain-containing protein 1)
F8WCR7	PLEKHA3	Pleckstrin homology domain-containing family A member 3
A0A140T995	HLA-DMA	HLA class II histocompatibility antigen, DM alpha chain (Fragment)
Q8IZE3	SCYL3	Protein-associating with the carboxyl-terminal domain of ezrin (Ezrin-binding protein PACE-1) (SCY1-like protein 3)
Q08881	ITK	Tyrosine-protein kinase ITK/TSK (EC 2.7.10.2) (Interleukin-2-inducible T-cell kinase) (IL-2-inducible T-cell kinase) (Kinase EMT) (T-cell-specific kinase) (Tyrosine-protein kinase Lyk)
E5RI44	RHOBTB2	Rho-related BTB domain-containing protein 2 (Fragment)
Q8TAG5	VSTM2A	V-set and transmembrane domain-containing protein 2A
Q13882	PTK6	Protein-tyrosine kinase 6 (EC 2.7.10.2) (Breast tumor kinase) (Tyrosine-protein kinase BRK)
K7EM02	KATNAL2	Katanin p60 ATPase-containing subunit A-like 2 (Fragment)
O94810	RGS11	Regulator of G-protein signaling 11 (RGS11)
E9PNH7	CRYAB	Alpha-crystallin B chain (Fragment)
A0A0B4J279	TRAV21	T cell receptor alpha variable 21
A0A075B7D8	IGHV3OR15-7	Immunoglobulin heavy variable 3/OR15-7 (pseudogene) (Fragment)
A0A087X0Z1	AGAP4	Arf-GAP with GTPase, ANK repeat and PH domain-containing protein 4
F8WDX3	RBM14	RNA-binding protein 14
F5GYL3	DDX24	ATP-dependent RNA helicase DDX24
G3V529	DDX24	ATP-dependent RNA helicase DDX24
P30511	HLA-F	HLA class I histocompatibility antigen, alpha chain F (CDA12) (HLA F antigen) (Leukocyte antigen F) (MHC class I antigen F)
Q9NWB1	RBFOX1	RNA binding protein fox-1 homolog 1 (Ataxin-2-binding protein 1) (Fox-1 homolog A) (Hexaribonucleotide-binding protein 1)
Q6ZNL6	FGD5	FYVE, RhoGEF and PH domain-containing protein 5 (Zinc finger FYVE domain-containing protein 23)
Q96P50	ACAP3	Arf-GAP with coiled-coil, ANK repeat and PH domain-containing protein 3 (Centaurin-beta-5) (Cnt-b5)
P11801	PSKH1	Serine/threonine-protein kinase H1 (EC 2.7.11.1) (Protein serine kinase H1) (PSK-H1)
Q99661	KIF2C	Kinesin-like protein KIF2C (Kinesin-like protein 6) (Mitotic centromere-associated kinesin) (MCAK)
Q8NBU1	STK3	Serine/threonine-protein kinase 3 (cDNA FLJ90748 fis, clone PLACE1011824, highly similar to Human Ste20-like kinase (MST2) mRNA)
Q9Y689	ARL5A	ADP-ribosylation factor-like protein 5A
S4R381	FGFR2	Fibroblast growth factor receptor 2
E9PL19	PUF60	Poly(U)-binding-splicing factor PUF60 (Fragment)
C9J0B0	TIGIT	T-cell immunoreceptor with Ig and ITIM domains (Fragment)
Q13418	ILK	Integrin-linked protein kinase (EC 2.7.11.1) (59 kDa serine/threonine-protein kinase) (ILK-1) (ILK-2) (p59ILK)
A0A087WXX9	PRKAA2	Non-specific serine/threonine protein kinase (EC 2.7.11.1)
B1AR60	SUPV3L1	ATP-dependent RNA helicase SUPV3L1, mitochondrial (Fragment)
O95067	CCNB2	G2/mitotic-specific cyclin-B2
Q8IV38	ANKMY2	Ankyrin repeat and MYND domain-containing protein 2
P30456	HLA-A	HLA class I histocompatibility antigen, A-43 alpha chain (Aw-43) (MHC class I antigen A*43)
A0A0C4DFS5	TDRD9	ATP-dependent RNA helicase TDRD9
H0YEW1	LRRK1	Leucine-rich repeat serine/threonine-protein kinase 1 (Fragment)
F5H4Z1	PTPN6	Tyrosine-protein phosphatase non-receptor type 6
Q6UXG3	CD300LG	CMRF35-like molecule 9 (CLM-9) (CD300 antigen-like family member G) (Triggering receptor expressed on myeloid cells 4) (TREM-4) (CD antigen CD300g)
Q96GW7	BCAN	Brevican core protein (Brain-enriched hyaluronan-binding protein) (BEHAB) (Chondroitin sulfate proteoglycan 7)
H0Y3C5	HCK	Tyrosine-protein kinase (EC 2.7.10.2)
Q7Z713	ANKRD37	Ankyrin repeat domain-containing protein 37 (Low-density lipoprotein receptor-related protein 2-binding protein) (hLrp2bp)
A0A087WSY6	IGKV3D-15	Immunoglobulin kappa variable 3D-15
Q29983	MICA	MHC class I polypeptide-related sequence A (MIC-A)
C9JVW8	ATP6V1A	V-type proton ATPase catalytic subunit A (Fragment)
Q96N96	SPATA13	Spermatogenesis-associated protein 13 (APC-stimulated guanine nucleotide exchange factor 2) (Asef2)
A6NER0	TBC1D3F	TBC1 domain family member 3F
P62820	RAB1A	Ras-related protein Rab-1A (YPT1-related protein)
F5H2L2	RECQL	ATP-dependent DNA helicase Q1 (Fragment)
P0CG38	POTEI	POTE ankyrin domain family member I
D3DUE4	ANKS3	Ankyrin repeat and SAM domain-containing protein 3 (Ankyrin repeat and sterile alpha motif domain containing 3, isoform CRA_a)
Q9Y243	AKT3	RAC-gamma serine/threonine-protein kinase (EC 2.7.11.1) (Protein kinase Akt-3) (Protein kinase B gamma) (PKB gamma) (RAC-PK-gamma) (STK-2)
H0YM23	ANKRD17	Ankyrin repeat domain-containing protein 17 (Fragment)
J3KQ99	HLA-DPA1	HLA class II histocompatibility antigen, DP alpha 1 chain (Fragment)
C9JQB1	NME6	Nucleoside diphosphate kinase (EC 2.7.4.6)
H0YBQ5	CCNC	Cyclin-C (Fragment)
O75676	RPS6KA4	Ribosomal protein S6 kinase alpha-4 (S6K-alpha-4) (EC 2.7.11.1) (90 kDa ribosomal protein S6 kinase 4) (Nuclear mitogen- and stress-activated protein kinase 2) (Ribosomal protein kinase B) (RSKB)
Q15771	RAB30	Ras-related protein Rab-30
A0A140T9K1	DDX39B	Spliceosome RNA helicase DDX39B (Fragment)
Q9Y2B9	PKIG	cAMP-dependent protein kinase inhibitor gamma (PKI-gamma)
P23083	IGHV1-2	Immunoglobulin heavy variable 1-2 (Ig heavy chain V-I region ND) (Ig heavy chain V-I region V35)
K7EN69	DDX39A	ATP-dependent RNA helicase DDX39A (Fragment)
P61587	RND3	Rho-related GTP-binding protein RhoE (Protein MemB) (Rho family GTPase 3) (Rho-related GTP-binding protein Rho8) (Rnd3)
B3VCF6	CHN2	Beta chimaerin isoform B1-CHNdel ex11-12 (Beta-chimaerin)
D6RBX9	HAPLN1	Hyaluronan and proteoglycan link protein 1 (Fragment)
P98174	FGD1	FYVE, RhoGEF and PH domain-containing protein 1 (Faciogenital dysplasia 1 protein) (Rho/Rac guanine nucleotide exchange factor FGD1) (Rho/Rac GEF) (Zinc finger FYVE domain-containing protein 3)
P68366	TUBA4A	Tubulin alpha-4A chain (Alpha-tubulin 1) (Testis-specific alpha-tubulin) (Tubulin H2-alpha) (Tubulin alpha-1 chain)
Q9NXU5	ARL15	ADP-ribosylation factor-like protein 15 (ADP-ribosylation factor-related protein 2) (ARF-related protein 2)
A0A0C4DH32	IGHV3-20	Immunoglobulin heavy variable 3-20
P48643	CCT5	T-complex protein 1 subunit epsilon (TCP-1-epsilon) (CCT-epsilon)
F8WBT0	ARAP1	Arf-GAP with Rho-GAP domain, ANK repeat and PH domain-containing protein 1 (Fragment)
Q92879	CELF1	CUGBP Elav-like family member 1 (CELF-1) (50 kDa nuclear polyadenylated RNA-binding protein) (Bruno-like protein 2) (CUG triplet repeat RNA-binding protein 1) (CUG-BP1) (CUG-BP- and ETR-3-like factor 1) (Deadenylation factor CUG-BP) (Embryo deadenylation element-binding protein homolog) (EDEN-BP homolog) (RNA-binding protein BRUNOL-2)
P61020	RAB5B	Ras-related protein Rab-5B
F8VS42	NPAS3	Neuronal PAS domain-containing protein 3 (Fragment)
Q96P48	ARAP1	Arf-GAP with Rho-GAP domain, ANK repeat and PH domain-containing protein 1 (Centaurin-delta-2) (Cnt-d2)
H0Y6T8	RAB18	Ras-related protein Rab-18 (Fragment)
Q96E39	RBMXL1	RNA binding motif protein, X-linked-like-1 (Heterogeneous nuclear ribonucleoprotein G-like 1)
P36888	FLT3	Receptor-type tyrosine-protein kinase FLT3 (EC 2.7.10.1) (FL cytokine receptor) (Fetal liver kinase-2) (FLK-2) (Fms-like tyrosine kinase 3) (FLT-3) (Stem cell tyrosine kinase 1) (STK-1) (CD antigen CD135)
Q5VT25	CDC42BPA	Serine/threonine-protein kinase MRCK alpha (EC 2.7.11.1) (CDC42-binding protein kinase alpha) (DMPK-like alpha) (Myotonic dystrophy kinase-related CDC42-binding kinase alpha) (MRCK alpha) (Myotonic dystrophy protein kinase-like alpha)
Q9NVG8	TBC1D13	TBC1 domain family member 13
J3QR41	AURKB	Aurora kinase B (Fragment)
A0A087X011	KIF3A	Kinesin-like protein
Q2M5E4	RGS21	Regulator of G-protein signaling 21 (RGS21)
J3KSZ0	EIF4A1	Eukaryotic initiation factor 4A-I (Fragment)
C9JSB2	CAMKV	CaM kinase-like vesicle-associated protein (Fragment)
Q7Z7A4	PXK	PX domain-containing protein kinase-like protein (Modulator of Na,K-ATPase) (MONaKA)
P01742	IGHV1-69	Immunoglobulin heavy variable 1-69 (Ig heavy chain V-I region EU) (Ig heavy chain V-I region SIE) (Ig heavy chain V-I region WOL)
D7R525	MAPK9	Mitogen-activated protein kinase (EC 2.7.11.24)
Q9UN19	DAPP1	Dual adapter for phosphotyrosine and 3-phosphotyrosine and 3-phosphoinositide (hDAPP1) (B lymphocyte adapter protein Bam32) (B-cell adapter molecule of 32 kDa)
H7C4F1	AGAP3	Arf-GAP with GTPase, ANK repeat and PH domain-containing protein 3 (Fragment)
A0A0J9YWM1	PUF60	Poly(U)-binding-splicing factor PUF60 (Fragment)
E7EPS8	PTPRM	Receptor-type tyrosine-protein phosphatase mu
F8VZK7	PHETA1	PH domain-containing endocytic-trafficking adaptor 1 (Fragment)
C9J795	NECTIN3	Nectin-3 (Fragment)
Q8NBY1	STK26	Serine/threonine-protein kinase 26 (cDNA FLJ90669 fis, clone PLACE1005519, moderately similar to Homo sapiens STE20-like kinase 3 (mst-3) mRNA)
P43403	ZAP70	Tyrosine-protein kinase ZAP-70 (EC 2.7.10.2) (70 kDa zeta-chain associated protein) (Syk-related tyrosine kinase)
A0A0C4DG91	NME6	Nucleoside diphosphate kinase (EC 2.7.4.6)
P49674	CSNK1E	Casein kinase I isoform epsilon (CKI-epsilon) (CKIe) (EC 2.7.11.1)
O60307	MAST3	Microtubule-associated serine/threonine-protein kinase 3 (EC 2.7.11.1)
F8W0P7	ATP5F1B	ATP synthase subunit beta, mitochondrial (Fragment)
Q8NDT2	RBM15B	Putative RNA-binding protein 15B (One-twenty two protein 3) (HuOTT3) (RNA-binding motif protein 15B)
K7EN94	TARDBP	TAR DNA-binding protein 43 (Fragment)
Q8IY67	RAVER1	Ribonucleoprotein PTB-binding 1 (Protein raver-1)
J3KRI8	AKT2	RAC-beta serine/threonine-protein kinase (Fragment)
Q8WWX0	ASB5	Ankyrin repeat and SOCS box protein 5 (ASB-5)
Q9BYP7	WNK3	Serine/threonine-protein kinase WNK3 (EC 2.7.11.1) (Protein kinase lysine-deficient 3) (Protein kinase with no lysine 3)
Q96PP8	GBP5	Guanylate-binding protein 5 (EC 3.6.5.-) (GBP-TA antigen) (GTP-binding protein 5) (GBP-5) (Guanine nucleotide-binding protein 5)
O75185	ATP2C2	Calcium-transporting ATPase type 2C member 2 (ATPase 2C2) (EC 3.6.3.8) (Secretory pathway Ca(2+)-ATPase 2)
M0R073	VRK3	Inactive serine/threonine-protein kinase VRK3
A2RRE5	GRLF1	GRLF1 protein
K7EQ37	UNC13D	Protein unc-13 homolog D (Fragment)
M0R042	TUBB4A	Tubulin beta chain (Fragment)
A0A087WT91	TBC1D3F	TBC1 domain family member 3F
E9PBE8	CAMK2B	Calcium/calmodulin-dependent protein kinase type II subunit beta (Fragment)
I3L0J8	MAPK7	Mitogen-activated protein kinase 7 (Fragment)
E9PP67	TOLLIP	Toll-interacting protein
Q86SQ0	PHLDB2	Pleckstrin homology-like domain family B member 2 (Protein LL5-beta)
O43347	MSI1	RNA-binding protein Musashi homolog 1 (Musashi-1)
V9GZ17	TUBA8	Tubulin alpha-8 chain (Fragment)
B1ANR0	PABPC4	Polyadenylate-binding protein (PABP)
R4GN15	ARHGAP9	Rho GTPase-activating protein 9
E9PMV2	HLA-DQA1	HLA class II histocompatibility antigen, DQ alpha 1 chain (Fragment)
P20340	RAB6A	Ras-related protein Rab-6A (Rab-6)
O95239	KIF4A	Chromosome-associated kinesin KIF4A (Chromokinesin-A)
P0C7X1	TBC1D3H	TBC1 domain family member 3H
F5GX62	RAP1B	Ras-related protein Rap-1b (Fragment)
E9PGF6	PHLDB2	Pleckstrin homology-like domain family B member 2
V9GY63	PLCG1	Phosphoinositide phospholipase C (EC 3.1.4.11) (Fragment)
A0A0A0MSS9	DAZ4	Deleted in azoospermia protein 4
H0YJD0	PLEK2	Pleckstrin-2 (Fragment)
Q9H361	PABPC3	Polyadenylate-binding protein 3 (PABP-3) (Poly(A)-binding protein 3) (Testis-specific poly(A)-binding protein)
J3QQT5	SGK494	Uncharacterized serine/threonine-protein kinase SgK494 (Fragment)
A0A0A0MQW5	LMTK3	Serine/threonine-protein kinase LMTK3
P30483	HLA-B	HLA class I histocompatibility antigen, B-45 alpha chain (Bw-45) (MHC class I antigen B*45)
Q13393	PLD1	Phospholipase D1 (PLD 1) (hPLD1) (EC 3.1.4.4) (Choline phosphatase 1) (Phosphatidylcholine-hydrolyzing phospholipase D1)
F8VYN5	HNRNPA1	Heterogeneous nuclear ribonucleoprotein A1 (Fragment)
P52735	VAV2	Guanine nucleotide exchange factor VAV2 (VAV-2)
Q5JX59	CPNE1	Copine-1 (Fragment)
C9JEC5	PNCK	Calcium/calmodulin-dependent protein kinase type 1B (Fragment)
H3BQ67	LONP2	Lon protease homolog 2, peroxisomal (Fragment)
P40763	STAT3	Signal transducer and activator of transcription 3 (Acute-phase response factor)
P35249	RFC4	Replication factor C subunit 4 (Activator 1 37 kDa subunit) (A1 37 kDa subunit) (Activator 1 subunit 4) (Replication factor C 37 kDa subunit) (RF-C 37 kDa subunit) (RFC37)
A0A0G2JLM6	TBC1D3B	TBC1 domain family member 3B
Q15283	RASA2	Ras GTPase-activating protein 2 (GTPase-activating protein 1m) (GAP1m)
A0A140T933	HLA-A	HLA class I histocompatibility antigen, A-3 alpha chain (Fragment)
Q6UXN2	TREML4	Trem-like transcript 4 protein (TLT-4) (Triggering receptor expressed on myeloid cells-like protein 4)
P0C264	SBK3	Uncharacterized serine/threonine-protein kinase SBK3 (EC 2.7.11.1) (SH3-binding domain kinase family member 3) (Sugen kinase 110)
D6RBM0	HNRNPH1	Heterogeneous nuclear ribonucleoprotein H (Fragment)
F8W822	GIT2	ARF GTPase-activating protein GIT2
A0A1B0GTL4		Deleted.
F8VVT9	AGAP2	Arf-GAP with GTPase, ANK repeat and PH domain-containing protein 2
H0Y7R8	AFDN	Afadin (Fragment)
E9PC90	CCNB1	G2/mitotic-specific cyclin-B1 (Fragment)
Q5JUB9	PRUNE2	Protein prune homolog 2 (Fragment)
P0DJD4	RBMY1C	RNA-binding motif protein, Y chromosome, family 1 member C
Q1RLN5	ARHGAP12	ARHGAP12 protein (Rho GTPase-activating protein 12)
P08567	PLEK	Pleckstrin (Platelet 47 kDa protein) (p47)
P0DJD3	RBMY1A1	RNA-binding motif protein, Y chromosome, family 1 member A1 (RNA-binding motif protein 1) (RNA-binding motif protein 2) (Y chromosome RNA recognition motif 1) (hRBMY)
E5RGH3	PABPC1	Polyadenylate-binding protein 1 (Fragment)
Q5RGS4	PLEKHA1	Pleckstrin homology domain-containing family A member 1
B7Z3L0	RAB37	Ras-related protein Rab-37 (cDNA FLJ61124, highly similar to Ras-related protein Rab-37)
A0A087X105		Deleted.
Q7Z434	MAVS	Mitochondrial antiviral-signaling protein (MAVS) (CARD adapter inducing interferon beta) (Cardif) (Interferon beta promoter stimulator protein 1) (IPS-1) (Putative NF-kappa-B-activating protein 031N) (Virus-induced-signaling adapter) (VISA)
Q00535	CDK5	Cyclin-dependent-like kinase 5 (EC 2.7.11.1) (Cell division protein kinase 5) (Serine/threonine-protein kinase PSSALRE) (Tau protein kinase II catalytic subunit) (TPKII catalytic subunit)
E9PQK4	CELF1	CUGBP Elav-like family member 1 (Fragment)
D6RC24	GAK	Cyclin-G-associated kinase (Fragment)
Q86TM3	DDX53	Probable ATP-dependent RNA helicase DDX53 (EC 3.6.4.13) (Cancer-associated gene protein) (Cancer/testis antigen 26) (CT26) (DEAD box protein 53) (DEAD box protein CAGE)
F5GY79	PTPN6	Tyrosine-protein phosphatase non-receptor type 6 (Fragment)
A0A140T9M1	MICA	MHC class I polypeptide-related sequence A
E9PGT3	RPS6KA1	Ribosomal protein S6 kinase (EC 2.7.11.1)
O60264	SMARCA5	SWI/SNF-related matrix-associated actin-dependent regulator of chromatin subfamily A member 5 (SWI/SNF-related matrix-associated actin-dependent regulator of chromatin A5) (EC 3.6.4.-) (Sucrose nonfermenting protein 2 homolog) (hSNF2H)
P45984	MAPK9	Mitogen-activated protein kinase 9 (MAP kinase 9) (MAPK 9) (EC 2.7.11.24) (JNK-55) (Stress-activated protein kinase 1a) (SAPK1a) (Stress-activated protein kinase JNK2) (c-Jun N-terminal kinase 2)
Q969Q4	ARL11	ADP-ribosylation factor-like protein 11 (ADP-ribosylation factor-like tumor suppressor protein 1)
Q96PF2	TSSK2	Testis-specific serine/threonine-protein kinase 2 (TSK-2) (TSK2) (TSSK-2) (Testis-specific kinase 2) (EC 2.7.11.1) (DiGeorge syndrome protein G) (DGS-G) (Serine/threonine-protein kinase 22B)
H7C476	RBM45	RNA-binding protein 45 (Fragment)
P17252	PRKCA	Protein kinase C alpha type (PKC-A) (PKC-alpha) (EC 2.7.11.13)
D3YTB5	IRAK1	Interleukin-1 receptor-associated kinase 1
Q8WWN8	ARAP3	Arf-GAP with Rho-GAP domain, ANK repeat and PH domain-containing protein 3 (Centaurin-delta-3) (Cnt-d3)
A0A075B7C7	IKBKE	Inhibitor of nuclear factor kappa-B kinase subunit epsilon (Fragment)
P11464	PSG1	Pregnancy-specific beta-1-glycoprotein 1 (PS-beta-G-1) (PSBG-1) (Pregnancy-specific glycoprotein 1) (CD66 antigen-like family member F) (Fetal liver non-specific cross-reactive antigen 1/2) (FL-NCA-1/2) (PSG95) (Pregnancy-specific beta-1 glycoprotein C/D) (PS-beta-C/D) (CD antigen CD66f)
A0A0G2JPD3	HLA-A	HLA class I histocompatibility antigen, A-3 alpha chain
Q01082	SPTBN1	Spectrin beta chain, non-erythrocytic 1 (Beta-II spectrin) (Fodrin beta chain) (Spectrin, non-erythroid beta chain 1)
Q9BVQ7	SPATA5L1	Spermatogenesis-associated protein 5-like protein 1
Q5T3I8	BCAN	Brevican core protein (Fragment)
Q7Z4S9	SH2D6	SH2 domain-containing protein 6
E7EM72	DGKI	Diacylglycerol kinase (DAG kinase) (EC 2.7.1.107)
P14222	PRF1	Perforin-1 (P1) (Cytolysin) (Lymphocyte pore-forming protein) (PFP)
U3NG26	BTK	Tyrosine-protein kinase (EC 2.7.10.2)
A0A075B6J9	IGLV2-18	Immunoglobulin lambda variable 2-18
P20936	RASA1	Ras GTPase-activating protein 1 (GAP) (GTPase-activating protein) (RasGAP) (Ras p21 protein activator) (p120GAP)
Q7Z4S6	KIF21A	Kinesin-like protein KIF21A (Kinesin-like protein KIF2) (Renal carcinoma antigen NY-REN-62)
E9PLD0	RAB1B	Ras-related protein Rab-1B
A0A0G2JIJ7	TCF19	TCF19 (Transcription factor 19)
P16615	ATP2A2	Sarcoplasmic/endoplasmic reticulum calcium ATPase 2 (SERCA2) (SR Ca(2+)-ATPase 2) (EC 3.6.3.8) (Calcium pump 2) (Calcium-transporting ATPase sarcoplasmic reticulum type, slow twitch skeletal muscle isoform) (Endoplasmic reticulum class 1/2 Ca(2+) ATPase)
Q14498	RBM39	RNA-binding protein 39 (CAPER alpha) (Hepatocellular carcinoma protein 1) (RNA-binding motif protein 39) (RNA-binding region-containing protein 2) (Splicing factor HCC1)
B7ZAR1	CCT5	T-complex protein 1 subunit epsilon (cDNA, FLJ79275, highly similar to T-complex protein 1 subunit epsilon)
Q29865	HLA-C	HLA class I histocompatibility antigen, Cw-18 alpha chain (MHC class I antigen Cw*18)
Q2V6Q1	ADAP2	Arf-GAP with dual PH domain-containing protein 2 (Centaurin alpha 2)
Q9NRH2	SNRK	SNF-related serine/threonine-protein kinase (EC 2.7.11.1) (SNF1-related kinase)
H3BQZ6	SYT17	Synaptotagmin-17
K7EPE2	GNAL	Guanine nucleotide-binding protein G(olf) subunit alpha (Fragment)
Q8WXF7	ATL1	Atlastin-1 (EC 3.6.5.-) (Brain-specific GTP-binding protein) (GTP-binding protein 3) (GBP-3) (hGBP3) (Guanine nucleotide-binding protein 3) (Spastic paraplegia 3 protein A)
Q9BQI3	EIF2AK1	Eukaryotic translation initiation factor 2-alpha kinase 1 (EC 2.7.11.1) (Heme-controlled repressor) (HCR) (Heme-regulated eukaryotic initiation factor eIF-2-alpha kinase) (Heme-regulated inhibitor) (Hemin-sensitive initiation factor 2-alpha kinase)
Q52LW3	ARHGAP29	Rho GTPase-activating protein 29 (PTPL1-associated RhoGAP protein 1) (Rho-type GTPase-activating protein 29)
Q9BWU1	CDK19	Cyclin-dependent kinase 19 (EC 2.7.11.22) (CDC2-related protein kinase 6) (Cell division cycle 2-like protein kinase 6) (Cell division protein kinase 19) (Cyclin-dependent kinase 11) (Death-preventing kinase)
B1AHC3	PRR5-ARHGAP8	PRR5-ARHGAP8 readthrough
P16118	PFKFB1	6-phosphofructo-2-kinase/fructose-2,6-bisphosphatase 1 (6PF-2-K/Fru-2,6-P2ase 1) (PFK/FBPase 1) (6PF-2-K/Fru-2,6-P2ase liver isozyme) [Includes: 6-phosphofructo-2-kinase (EC 2.7.1.105); Fructose-2,6-bisphosphatase (EC 3.1.3.46)]
D6RAU3	MAPK10	Mitogen-activated protein kinase 10 (Fragment)
P30493	HLA-B	HLA class I histocompatibility antigen, B-55 alpha chain (Bw-55) (HLA class I histocompatibility antigen, B-12 alpha chain) (MHC class I antigen B*55)
A0A140T9D6	HLA-DPA1	HLA class II histocompatibility antigen, DP alpha 1 chain (Fragment)
Q6XYQ8	SYT10	Synaptotagmin-10 (Synaptotagmin X) (SytX)
F8VQ14	CCT2	T-complex protein 1 subunit beta
Q86XH1	IQCA1	Dynein regulatory complex protein 11 (IQ and AAA domain-containing protein 1)
F8W1T5	RHEBL1	GTPase RhebL1 (Fragment)
B2RU33	POTEC	POTE ankyrin domain family member C (ANKRD26-like family B member 2) (Prostate, ovary, testis-expressed protein on chromosome 18) (POTE-18)
H7C211	AGAP1	Arf-GAP with GTPase, ANK repeat and PH domain-containing protein 1 (Fragment)
A0A0J9YWJ4	CTDP1	RNA polymerase II subunit A C-terminal domain phosphatase (Fragment)
A6NIR3	AGAP5	Arf-GAP with GTPase, ANK repeat and PH domain-containing protein 5 (AGAP-5) (Centaurin-gamma-like family member 2)
E5RJ69	SLA	Src-like-adapter (Fragment)
A0A140T9Z6	HLA-A	HLA class I histocompatibility antigen, A-3 alpha chain
Q9BQ39	DDX50	ATP-dependent RNA helicase DDX50 (EC 3.6.4.13) (DEAD box protein 50) (Gu-beta) (Nucleolar protein Gu2)
P30487	HLA-B	HLA class I histocompatibility antigen, B-49 alpha chain (HLA class I histocompatibility antigen, B-21 alpha chain) (MHC class I antigen B*49)
Q8NG66	NEK11	Serine/threonine-protein kinase Nek11 (EC 2.7.11.1) (Never in mitosis A-related kinase 11) (NimA-related protein kinase 11)
O00443	PIK3C2A	Phosphatidylinositol 4-phosphate 3-kinase C2 domain-containing subunit alpha (PI3K-C2-alpha) (PtdIns-3-kinase C2 subunit alpha) (EC 2.7.1.154) (Phosphoinositide 3-kinase-C2-alpha)
A0A140T9L4	DDX39B	Spliceosome RNA helicase DDX39B (Fragment)
G3V5V0	NEK9	Serine/threonine-protein kinase Nek9 (Fragment)
A0A0B4J2E0	TRBV12-4	T cell receptor beta variable 12-4
O75962	TRIO	Triple functional domain protein (EC 2.7.11.1) (PTPRF-interacting protein)
A0A087X2C3	RAP2C	RAP2C, member of RAS oncogene family, isoform CRA_b (Ras-related protein Rap-2c)
F8W0A2	NUBPL	Iron-sulfur protein NUBPL (Fragment)
K7EL63	ANKRD29	Ankyrin repeat domain-containing protein 29 (Fragment)
D6RHC7	GRK6	G protein-coupled receptor kinase (EC 2.7.11.-) (Fragment)
A0A140T980	HLA-DPA1	HLA class II histocompatibility antigen, DP alpha 1 chain (Fragment)
P61026	RAB10	Ras-related protein Rab-10
A0A140T9A9	HLA-B	HLA class I histocompatibility antigen, B-46 alpha chain (Fragment)
Q13177	PAK2	Serine/threonine-protein kinase PAK 2 (EC 2.7.11.1) (Gamma-PAK) (PAK65) (S6/H4 kinase) (p21-activated kinase 2) (PAK-2) (p58) [Cleaved into: PAK-2p27 (p27); PAK-2p34 (p34) (C-t-PAK2)]
F6XZD3	ANKRD35	Ankyrin repeat domain-containing protein 35
A6NJ16		Deleted.
F8W1T6	RBMS2	RNA-binding motif, single-stranded-interacting protein 2
P20336	RAB3A	Ras-related protein Rab-3A
H0Y9N6	HK3	Phosphotransferase (EC 2.7.1.-) (Fragment)
C9J4V0	RAB7A	Ras-related protein Rab-7a
Q86YS7	C2CD5	C2 domain-containing protein 5 (C2 domain-containing phosphoprotein of 138 kDa)
F5H6P7	MAGOHB	Protein mago nashi homolog 2
Q9Y2X7	GIT1	ARF GTPase-activating protein GIT1 (ARF GAP GIT1) (Cool-associated and tyrosine-phosphorylated protein 1) (CAT-1) (CAT1) (G protein-coupled receptor kinase-interactor 1) (GRK-interacting protein 1)
Q6P1N0	CC2D1A	Coiled-coil and C2 domain-containing protein 1A (Akt kinase-interacting protein 1) (Five prime repressor element under dual repression-binding protein 1) (FRE under dual repression-binding protein 1) (Freud-1) (Putative NF-kappa-B-activating protein 023N)
H7BXX9	HIPK2	Homeodomain-interacting protein kinase 2
Q76FK4	NOL8	Nucleolar protein 8 (Nucleolar protein Nop132)
Q8N7R7	CCNYL1	Cyclin-Y-like protein 1
P09326	CD48	CD48 antigen (B-lymphocyte activation marker BLAST-1) (BCM1 surface antigen) (Leukocyte antigen MEM-102) (SLAM family member 2) (SLAMF2) (Signaling lymphocytic activation molecule 2) (TCT.1) (CD antigen CD48)
Q95604	HLA-C	HLA class I histocompatibility antigen, Cw-17 alpha chain (MHC class I antigen Cw*17)
A0A140T9R5	NOTCH4	NOTCH4 (Neurogenic locus notch homolog protein 4)
Q96L35	EPHB4	EPH receptor B4, isoform CRA_b (Ephrin type-B receptor 4) (Receptor protein tyrosine kinase variant EphB4v1)
A0A5A6	TRBV11-3	T cell receptor beta variable 11-3
Q5SZQ8	CELF3	CUGBP Elav-like family member 3 (CELF-3) (Bruno-like protein 1) (CAG repeat protein 4) (CUG-BP- and ETR-3-like factor 3) (ELAV-type RNA-binding protein 1) (ETR-1) (Expanded repeat domain protein CAG/CTG 4) (RNA-binding protein BRUNOL-1) (Trinucleotide repeat-containing gene 4 protein)
G3V2X7	STAT6	Signal transducer and activator of transcription 6 (Fragment)
Q96P47	AGAP3	Arf-GAP with GTPase, ANK repeat and PH domain-containing protein 3 (AGAP-3) (CRAM-associated GTPase) (CRAG) (Centaurin-gamma-3) (Cnt-g3) (MR1-interacting protein) (MRIP-1)
P22674	CCNO	Cyclin-O
P01891	HLA-A	HLA class I histocompatibility antigen, A-68 alpha chain (Aw-68) (HLA class I histocompatibility antigen, A-28 alpha chain) (MHC class I antigen A*68)
A0A087WZQ5	MERTK	Tyrosine-protein kinase Mer
D6R9V4	GRK6	G protein-coupled receptor kinase 6 (Fragment)
E9PGX9	SSB	Lupus La protein (Fragment)
K7EPY5	ANKS3	Ankyrin repeat and SAM domain-containing protein 3
B7ZB78	RAP1B	Ras-related protein Rap-1b (cDNA, FLJ79442, highly similar to Ras-related protein Rap-1b)
A0A087WX29	TARDBP	TAR DNA-binding protein 43 (Fragment)
A0A087WUK2	HNRNPDL	Heterogeneous nuclear ribonucleoprotein D-like (Heterogeneous nuclear ribonucleoprotein D-like, isoform CRA_b)
O75815	BCAR3	Breast cancer anti-estrogen resistance protein 3 (Novel SH2-containing protein 2) (SH2 domain-containing protein 3B)
P29353	SHC1	SHC-transforming protein 1 (SHC-transforming protein 3) (SHC-transforming protein A) (Src homology 2 domain-containing-transforming protein C1) (SH2 domain protein C1)
H3BLS9	ANKHD1	Ankyrin repeat and KH domain-containing protein 1 (Fragment)
C9JTT7	RFC4	Replication factor C subunit 4 (Fragment)
Q9HCH5	SYTL2	Synaptotagmin-like protein 2 (Breast cancer-associated antigen SGA-72M) (Exophilin-4)
F5GZI8	TCP1	T-complex protein 1 subunit alpha
A0A0G2JMH6	HLA-DRA	HLA class II histocompatibility antigen, DR alpha chain (HLA-DRA)
A0A0C4DGH0	CD276	CD276 antigen
G3V4X4	PRKCH	Protein kinase C eta type (Fragment)
A0A182DWH4	HLA-DRB3	HLA class II histocompatibility antigen, DR beta 3 chain
P23443	RPS6KB1	Ribosomal protein S6 kinase beta-1 (S6K-beta-1) (S6K1) (EC 2.7.11.1) (70 kDa ribosomal protein S6 kinase 1) (P70S6K1) (p70-S6K 1) (Ribosomal protein S6 kinase I) (Serine/threonine-protein kinase 14A) (p70 ribosomal S6 kinase alpha) (p70 S6 kinase alpha) (p70 S6K-alpha) (p70 S6KA)
O94925	GLS	Glutaminase kidney isoform, mitochondrial (GLS) (EC 3.5.1.2) (K-glutaminase) (L-glutamine amidohydrolase)
H3BSE1	TBC1D10B	TBC1 domain family member 10B (Fragment)
P98179	RBM3	RNA-binding protein 3 (RNA-binding motif protein 3) (RNPL)
P11465	PSG2	Pregnancy-specific beta-1-glycoprotein 2 (PS-beta-G-2) (PSBG-2) (Pregnancy-specific glycoprotein 2) (Pregnancy-specific beta-1 glycoprotein E) (PS-beta-E)
P04432	IGKV1D-39	Immunoglobulin kappa variable 1D-39 (Ig kappa chain V-I region Daudi)
F8WC88	CDKL4	Cyclin-dependent kinase-like 4
F5GXK4	TBC1D14	TBC1 domain family member 14
Q13094	LCP2	Lymphocyte cytosolic protein 2 (SH2 domain-containing leukocyte protein of 76 kDa) (SLP-76 tyrosine phosphoprotein) (SLP76)
J3QL70	RGS9	Regulator of G-protein-signaling 9
Q96J02	ITCH	E3 ubiquitin-protein ligase Itchy homolog (Itch) (EC 2.3.2.26) (Atrophin-1-interacting protein 4) (AIP4) (HECT-type E3 ubiquitin transferase Itchy homolog) (NFE2-associated polypeptide 1) (NAPP1)
Q5JX56	CPNE1	Copine-1 (Fragment)
Q9TNN7	HLA-C	HLA class I histocompatibility antigen, Cw-5 alpha chain (MHC class I antigen Cw*5)
D6RC49	TRPC3	Short transient receptor potential channel 3
P14635	CCNB1	G2/mitotic-specific cyclin-B1
G3V576	HNRNPC	Heterogeneous nuclear ribonucleoproteins C1/C2
D6RD83	HNRNPD	Heterogeneous nuclear ribonucleoprotein D0 (Fragment)
G3V2Q1	HNRNPC	Heterogeneous nuclear ribonucleoproteins C1/C2
E7ERQ6	DAZ3	Deleted in azoospermia protein 3
D6RIX2	CCND3	G1/S-specific cyclin-D3 (Fragment)
Q99759	MAP3K3	Mitogen-activated protein kinase kinase kinase 3 (EC 2.7.11.25) (MAPK/ERK kinase kinase 3) (MEK kinase 3) (MEKK 3)
F8W1R9	TGFBR1	Receptor protein serine/threonine kinase (EC 2.7.11.30)
K7EIJ8	KATNAL2	Katanin p60 ATPase-containing subunit A-like 2 (Fragment)
P08922	ROS1	Proto-oncogene tyrosine-protein kinase ROS (EC 2.7.10.1) (Proto-oncogene c-Ros) (Proto-oncogene c-Ros-1) (Receptor tyrosine kinase c-ros oncogene 1) (c-Ros receptor tyrosine kinase)
A0A1B0GX50	AXIN2	Axin-2 (Fragment)
C9J8V9	PIM2	Serine/threonine-protein kinase pim-2 (Fragment)
A0A0B4J2H0	IGHV1-69D	Immunoglobulin heavy variable 1-69D
E7ES60	RAB34	Ras-related protein Rab-34, isoform NARR
Q9UN37	VPS4A	Vacuolar protein sorting-associated protein 4A (EC 3.6.4.6) (Protein SKD2) (VPS4-1) (hVPS4)
Q9UIW2	PLXNA1	Plexin-A1 (Semaphorin receptor NOV)
B2RXH8	HNRNPCL2	Heterogeneous nuclear ribonucleoprotein C-like 2 (hnRNP C-like-2)
A2PYH4	HFM1	Probable ATP-dependent DNA helicase HFM1 (EC 3.6.4.12) (SEC63 domain-containing protein 1)
P30457	HLA-A	HLA class I histocompatibility antigen, A-66 alpha chain (Aw-66) (HLA class I histocompatibility antigen, A-10 alpha chain) (MHC class I antigen A*66)
C9J3V9	CHN1	N-chimaerin (Fragment)
J3QR62	DDX5	Probable ATP-dependent RNA helicase DDX5 (Fragment)
A0A0B4J2F4	TBC1D3I	TBC1 domain family member 3I
Q86WV1	SKAP1	Src kinase-associated phosphoprotein 1 (Src family-associated phosphoprotein 1) (Src kinase-associated phosphoprotein of 55 kDa) (SKAP-55) (pp55)
E9PMJ1	RAB30	Ras-related protein Rab-30 (Fragment)
Q9NS87	KIF15	Kinesin-like protein KIF15 (Kinesin-like protein 2) (hKLP2) (Kinesin-like protein 7) (Serologically defined breast cancer antigen NY-BR-62)
Q9H0S4	DDX47	Probable ATP-dependent RNA helicase DDX47 (EC 3.6.4.13) (DEAD box protein 47)
M0R0D0	DAPK3	Death-associated protein kinase 3 (Fragment)
A0A0C4DG46	ASB15	Ankyrin repeat and SOCS box protein 15 (Fragment)
A0A0C4DH30	IGHV3-16	Immunoglobulin heavy variable 3-16 (non-functional) (Fragment)
P30480	HLA-B	HLA class I histocompatibility antigen, B-42 alpha chain (MHC class I antigen B*42)
Q06124	PTPN11	Tyrosine-protein phosphatase non-receptor type 11 (EC 3.1.3.48) (Protein-tyrosine phosphatase 1D) (PTP-1D) (Protein-tyrosine phosphatase 2C) (PTP-2C) (SH-PTP2) (SHP-2) (Shp2) (SH-PTP3)
Q15788	NCOA1	Nuclear receptor coactivator 1 (NCoA-1) (EC 2.3.1.48) (Class E basic helix-loop-helix protein 74) (bHLHe74) (Protein Hin-2) (RIP160) (Renal carcinoma antigen NY-REN-52) (Steroid receptor coactivator 1) (SRC-1)
H0YA62	CCNB1	G2/mitotic-specific cyclin-B1 (Fragment)
J3KQG3	EPHA10	EPH receptor A10, isoform CRA_b (Ephrin type-A receptor 10)
E9PPC7	SGK494	Uncharacterized serine/threonine-protein kinase SgK494 (Fragment)
A0A0B4J2B9	TUBE1	Tubulin epsilon chain
P20039	HLA-DRB1	HLA class II histocompatibility antigen, DRB1-11 beta chain (DR-5) (DR5) (DRw11) (MHC class II antigen DRB1*11)
A0A0A0MSR9	DAZ1	Deleted in azoospermia protein 1
F8VTQ3	PFKM	ATP-dependent 6-phosphofructokinase, muscle type (Fragment)
Q9NPA0	EMC7	ER membrane protein complex subunit 7
M0R131	DYRK1B	Dual-specificity tyrosine-phosphorylation-regulated kinase 1B (Fragment)
Q8TDY4	ASAP3	Arf-GAP with SH3 domain, ANK repeat and PH domain-containing protein 3 (Development and differentiation-enhancing factor-like 1) (Protein up-regulated in liver cancer 1)
A0A087WYN9	DHX29	ATP-dependent RNA helicase DHX29 (EC 3.6.4.13) (DEAH box protein 29)
P19878	NCF2	Neutrophil cytosol factor 2 (NCF-2) (67 kDa neutrophil oxidase factor) (NADPH oxidase activator 2) (Neutrophil NADPH oxidase factor 2) (p67-phox)
Q5TCY1	TTBK1	Tau-tubulin kinase 1 (EC 2.7.11.1) (Brain-derived tau kinase)
Q86YQ8	CPNE8	Copine-8 (Copine VIII)
Q70Z35	PREX2	Phosphatidylinositol 3,4,5-trisphosphate-dependent Rac exchanger 2 protein (P-Rex2) (PtdIns(3,4,5)-dependent Rac exchanger 2) (DEP domain-containing protein 2)
Q8IZP1	TBC1D3	TBC1 domain family member 3 (Prostate cancer gene 17 protein) (Protein TRE17-alpha) (Rab GTPase-activating protein PRC17)
H0YDJ3	PRPF4B	Serine/threonine-protein kinase PRP4 homolog (Fragment)
Q5W0W2	KANK1	KN motif and ankyrin repeat domain-containing protein 1 (Fragment)
P09923	ALPI	Intestinal-type alkaline phosphatase (IAP) (Intestinal alkaline phosphatase) (EC 3.1.3.1)
J3KSW8	MPRIP	Myosin phosphatase Rho-interacting protein (Fragment)
M0QZK3	AKT2	RAC-beta serine/threonine-protein kinase (Fragment)
Q6P0Q8	MAST2	Microtubule-associated serine/threonine-protein kinase 2 (EC 2.7.11.1)
R4GMR8	NTRK3	NT-3 growth factor receptor (Fragment)
H0Y6Z7	PTPRF	Receptor-type tyrosine-protein phosphatase F (Fragment)
A0A140T9S7	HLA-C	HLA class I histocompatibility antigen, Cw-6 alpha chain (Fragment)
E5RHY6	SGK3	Serine/threonine-protein kinase Sgk3 (Fragment)
Q6IQ42	SRSF10	FUSIP1 protein (Serine/arginine-rich-splicing factor 10)
X6R8H3	SGK2	Serine/threonine-protein kinase Sgk2
H7C5H6	ARL6	ADP-ribosylation factor-like protein 6 (Fragment)
F8WD25	PHKG1	Phosphorylase b kinase gamma catalytic chain, skeletal muscle/heart isoform
F5H866	PLEKHB1	Pleckstrin homology domain-containing family B member 1 (Fragment)
J3QL45	AKT2	RAC-beta serine/threonine-protein kinase (Fragment)
C9JFJ0	ROCK2	Rho-associated protein kinase 2 (Fragment)
Q5JR08	RHOC	Rho-related GTP-binding protein RhoC (Fragment)
Q4R9M9	KIF1B	Kinesin family member 1Bbeta isoform II (Kinesin-like protein KIF1B)
K7EJK3	CELF4	CUGBP Elav-like family member 4 (Fragment)
Q9BW62	KATNAL1	Katanin p60 ATPase-containing subunit A-like 1 (Katanin p60 subunit A-like 1) (EC 3.6.4.3) (p60 katanin-like 1)
F6WLT2	DDX39B	Spliceosome RNA helicase DDX39B (Fragment)
A0A075B6R2	IGHV4-4	Immunoglobulin heavy variable 4-4
Q14807	KIF22	Kinesin-like protein KIF22 (Kinesin-like DNA-binding protein) (Kinesin-like protein 4)
H0YNX4	CPNE6	Copine-6 (Fragment)
O14981	BTAF1	TATA-binding protein-associated factor 172 (EC 3.6.4.-) (ATP-dependent helicase BTAF1) (B-TFIID transcription factor-associated 170 kDa subunit) (TAF(II)170) (TBP-associated factor 172) (TAF-172)
D6RDG2	TBCK	TBC domain-containing protein kinase-like protein (Fragment)
Q05193	DNM1	Dynamin-1 (EC 3.6.5.5)
C9IY66	BTN2A2	Butyrophilin subfamily 2 member A2 (Fragment)
P23468	PTPRD	Receptor-type tyrosine-protein phosphatase delta (Protein-tyrosine phosphatase delta) (R-PTP-delta) (EC 3.1.3.48)
Q5W0J0	RAB18	Ras-related protein Rab-18
A0A0A0MS00	IGLV3-32	Immunoglobulin lambda variable 3-32 (non-functional) (Fragment)
P30504	HLA-C	HLA class I histocompatibility antigen, Cw-4 alpha chain (MHC class I antigen Cw*4)
B5MDF5	RAN	GTP-binding nuclear protein Ran
Q6PIW4	FIGNL1	Fidgetin-like protein 1 (EC 3.6.4.-)
A0A0B4J280	TRAV40	T cell receptor alpha variable 40
H0YJX2	PSMC6	26S proteasome regulatory subunit 10B (Fragment)
E7ENA5	DAZ4	Deleted in azoospermia protein 4
Q5SW79	CEP170	Centrosomal protein of 170 kDa (Cep170) (KARP-1-binding protein) (KARP1-binding protein)
A0A140T9P1	HLA-DPB1	HLA class II histocompatibility antigen, DP beta 1 chain (Fragment)
B8ZZ96	CHN1	N-chimaerin
P61011	SRP54	Signal recognition particle 54 kDa protein (SRP54)
Q9H0U4	RAB1B	Ras-related protein Rab-1B
F6XNB3	PFKFB2	6-phosphofructo-2-kinase/fructose-2,6-bisphosphatase 2
A0A087WWA3	KIF1B	Kinesin-like protein KIF1B
A0A0A0MRJ0	CDC42BPA	Non-specific serine/threonine protein kinase (EC 2.7.11.1)
Q68CZ2	TNS3	Tensin-3 (Tensin-like SH2 domain-containing protein 1) (Tumor endothelial marker 6)
Q7L0Q8	RHOU	Rho-related GTP-binding protein RhoU (CDC42-like GTPase 1) (GTP-binding protein-like 1) (Rho GTPase-like protein ARHU) (Ryu GTPase) (Wnt-1 responsive Cdc42 homolog 1) (WRCH-1)
A0A0A0MTJ8	CADM1	Cell adhesion molecule 1 (Fragment)
Q9BRK3	MXRA8	Matrix remodeling-associated protein 8 (Limitrin)
X6R6D0	SHC1	SHC-transforming protein 1
H7C0A2	BCL3	B-cell lymphoma 3 protein (Fragment)
A0A182DWE9	HLA-DPB1	HLA class II histocompatibility antigen, DP beta 1 chain (MHC class II antigen)
F5H7L7	TBC1D30	TBC1 domain family member 30 (Fragment)
A0A0G2JS40	CEACAM21	Carcinoembryonic antigen-related cell adhesion molecule 21 (Carcinoembryonic antigen-related cell adhesion molecule 21, isoform CRA_b)
O00444	PLK4	Serine/threonine-protein kinase PLK4 (EC 2.7.11.21) (Polo-like kinase 4) (PLK-4) (Serine/threonine-protein kinase 18) (Serine/threonine-protein kinase Sak)
Q9NYY3	PLK2	Serine/threonine-protein kinase PLK2 (EC 2.7.11.21) (Polo-like kinase 2) (PLK-2) (hPlk2) (Serine/threonine-protein kinase SNK) (hSNK) (Serum-inducible kinase)
Q15052	ARHGEF6	Rho guanine nucleotide exchange factor 6 (Alpha-Pix) (COOL-2) (PAK-interacting exchange factor alpha) (Rac/Cdc42 guanine nucleotide exchange factor 6)
M0QZQ6	SH2D3A	SH2 domain-containing protein 3A (Fragment)
A0A1B0GV84	ARHGEF9	Rho guanine nucleotide exchange factor 9
E5RI85	MOK	MAPK/MAK/MRK overlapping kinase
M0QYM4	FCGRT	IgG receptor FcRn large subunit p51 (Fragment)
P57052	RBM11	Splicing regulator RBM11 (RNA-binding motif protein 11)
B4DXA6	AURKC	Aurora kinase C (cDNA FLJ60936, highly similar to Serine/threonine-protein kinase 13 (EC 2.7.11.1))
A0A140T9P3	MICA	MHC class I polypeptide-related sequence A (Fragment)
P32455	GBP1	Guanylate-binding protein 1 (EC 3.6.5.-) (GTP-binding protein 1) (GBP-1) (HuGBP-1) (Guanine nucleotide-binding protein 1) (Interferon-induced guanylate-binding protein 1)
E9PJI0	ANKRD36C	Ankyrin repeat domain-containing protein 36C
H0YHL8	PPP1R12A	Protein phosphatase 1 regulatory subunit 12A (Fragment)
H0Y465	NF1	Neurofibromin (Fragment)
C9J2C0	TUBA8	Tubulin alpha chain (Fragment)
H0YAB2	PLXND1	Plexin-D1 (Fragment)
A0A140T921	HLA-C	HLA class I histocompatibility antigen, Cw-6 alpha chain
F8VX11	EIF4B	Eukaryotic translation initiation factor 4B (Fragment)
J3KNW3	RBFOX1	RNA binding protein fox-1 homolog
T2HUW8	CEACAM5	Carcinoembryonic antigen-related cell adhesion molecule 5 (Carcinoembryonic antigen-related cell adhesion molecule 5 isoform 3D)
H0Y4E7	GAPVD1	GTPase-activating protein and VPS9 domain-containing protein 1 (Fragment)
Q92692	NECTIN2	Nectin-2 (Herpes virus entry mediator B) (Herpesvirus entry mediator B) (HveB) (Nectin cell adhesion molecule 2) (Poliovirus receptor-related protein 2) (CD antigen CD112)
A0A140T9T1	HLA-C	HLA class I histocompatibility antigen, Cw-6 alpha chain (Fragment)
Q8TDQ0	HAVCR2	Hepatitis A virus cellular receptor 2 (HAVcr-2) (T-cell immunoglobulin and mucin domain-containing protein 3) (TIMD-3) (T-cell immunoglobulin mucin receptor 3) (TIM-3) (T-cell membrane protein 3)
K7ERH1	CELF4	CUGBP Elav-like family member 4 (Fragment)
H7C343	TNK2	Activated CDC42 kinase 1 (Fragment)
P01893	HLA-H	Putative HLA class I histocompatibility antigen, alpha chain H (HLA-12.4) (HLA-AR) (MHC class I antigen H)
Q6ZWH5	NEK10	Serine/threonine-protein kinase Nek10 (EC 2.7.11.1) (Never in mitosis A-related kinase 10) (NimA-related protein kinase 10)
Q9NY65	TUBA8	Tubulin alpha-8 chain (Alpha-tubulin 8) (Tubulin alpha chain-like 2)
P68400	CSNK2A1	Casein kinase II subunit alpha (CK II alpha) (EC 2.7.11.1)
A0A0J9YXI7	TRPV5	Transient receptor potential cation channel subfamily V member 5
A0A0G2JL56	HLA-A	HLA class I histocompatibility antigen, A-3 alpha chain
I3L531	NUBP1	Cytosolic Fe-S cluster assembly factor NUBP1 (Fragment)
H0YCC6	DDX39B	Spliceosome RNA helicase DDX39B (Fragment)
H3BS90	ATP2C2	Calcium-transporting ATPase type 2C member 2 (Fragment)
F8VW50	KIF19	Kinesin-like protein (Fragment)
Q68DC2	ANKS6	Ankyrin repeat and SAM domain-containing protein 6 (Ankyrin repeat domain-containing protein 14) (SamCystin) (Sterile alpha motif domain-containing protein 6) (SAM domain-containing protein 6)
J3KQS5	PLEKHA8	Pleckstrin homology domain-containing family A member 8 (Fragment)
F8W0P6	UNC13A	Protein unc-13 homolog A
P55795	HNRNPH2	Heterogeneous nuclear ribonucleoprotein H2 (hnRNP H2) (FTP-3) (Heterogeneous nuclear ribonucleoprotein H') (hnRNP H') [Cleaved into: Heterogeneous nuclear ribonucleoprotein H2, N-terminally processed]
H0YMI1	UACA	Uveal autoantigen with coiled-coil domains and ankyrin repeats (Fragment)
Q6ZUM4	ARHGAP27	Rho GTPase-activating protein 27 (CIN85-associated multi-domain-containing Rho GTPase-activating protein 1) (Rho-type GTPase-activating protein 27) (SH3 domain-containing protein 20)
B4DIB3	MARK1	Non-specific serine/threonine protein kinase (EC 2.7.11.1)
P29074	PTPN4	Tyrosine-protein phosphatase non-receptor type 4 (EC 3.1.3.48) (Protein-tyrosine phosphatase MEG1) (MEG) (PTPase-MEG1)
A0A140T9J9	HLA-C	HLA class I histocompatibility antigen, Cw-6 alpha chain
P07437	TUBB	Tubulin beta chain (Tubulin beta-5 chain)
A0A140T9I5	MICA	MHC class I polypeptide-related sequence A (Fragment)
P0CF51	TRGC1	T-cell receptor gamma chain C region 1
Q99742	NPAS1	Neuronal PAS domain-containing protein 1 (Neuronal PAS1) (Basic-helix-loop-helix-PAS protein MOP5) (Class E basic helix-loop-helix protein 11) (bHLHe11) (Member of PAS protein 5) (PAS domain-containing protein 5)
P13611	VCAN	Versican core protein (Chondroitin sulfate proteoglycan core protein 2) (Chondroitin sulfate proteoglycan 2) (Glial hyaluronate-binding protein) (GHAP) (Large fibroblast proteoglycan) (PG-M)
P52298	NCBP2	Nuclear cap-binding protein subunit 2 (20 kDa nuclear cap-binding protein) (Cell proliferation-inducing gene 55 protein) (NCBP 20 kDa subunit) (CBP20) (NCBP-interacting protein 1) (NIP1)
Q86XP3	DDX42	ATP-dependent RNA helicase DDX42 (EC 3.6.4.13) (DEAD box protein 42) (RNA helicase-like protein) (RHELP) (RNA helicase-related protein) (RNAHP) (SF3b DEAD box protein) (Splicing factor 3B-associated 125 kDa protein) (SF3b125)
A0A0A6YYB3	ARHGEF9	Rho guanine nucleotide exchange factor 9
F8VX09	TUBA1B	Tubulin alpha-1B chain (Fragment)
Q15139	PRKD1	Serine/threonine-protein kinase D1 (EC 2.7.11.13) (Protein kinase C mu type) (Protein kinase D) (nPKC-D1) (nPKC-mu)
H7C109	DHX57	Putative ATP-dependent RNA helicase DHX57 (Fragment)
Q5QPD4	AURKA	Aurora kinase A (Fragment)
P17693	HLA-G	HLA class I histocompatibility antigen, alpha chain G (HLA G antigen) (MHC class I antigen G)
H0YLF3	B2M	Beta-2-microglobulin (Fragment)
H7C2I6	IRAK1	Interleukin-1 receptor-associated kinase 1 (Fragment)
Q9UBK7	RABL2A	Rab-like protein 2A
Q9UL26	RAB22A	Ras-related protein Rab-22A (Rab-22)
H0YAM9	PLXND1	Plexin-D1 (Fragment)
B8ZZY2	AGFG1	Arf-GAP domain and FG repeat-containing protein 1
F8VWU4	RAB5C	Ras-related protein Rab-5C (Fragment)
F8W1K6	PLXNC1	Plexin-C1
A0A087WZR6		Deleted.
Q9UKA9	PTBP2	Polypyrimidine tract-binding protein 2 (Neural polypyrimidine tract-binding protein) (Neurally-enriched homolog of PTB) (PTB-like protein)
H3BVB4	DOK4	Docking protein 4 (Fragment)
P23634	ATP2B4	Plasma membrane calcium-transporting ATPase 4 (PMCA4) (EC 3.6.3.8) (Matrix-remodeling-associated protein 1) (Plasma membrane calcium ATPase isoform 4) (Plasma membrane calcium pump isoform 4)
Q7Z3J3	RGPD4	RanBP2-like and GRIP domain-containing protein 4
P09012	SNRPA	U1 small nuclear ribonucleoprotein A (U1 snRNP A) (U1-A) (U1A)
H0YIZ5	PLEK2	Pleckstrin-2 (Fragment)
E9PGC0	RASA1	Ras GTPase-activating protein 1
P30510	HLA-C	HLA class I histocompatibility antigen, Cw-14 alpha chain (MHC class I antigen Cw*14)
H0Y820	CHEK2	Serine/threonine-protein kinase Chk2 (Fragment)
Q7Z3H0	ANKRD33	Photoreceptor ankyrin repeat protein (Ankyrin repeat domain-containing protein 33)
J3KP90	CCNC	Cyclin-C
G3V162	TARDBP	TAR DNA binding protein, isoform CRA_d (TAR DNA-binding protein 43)
Q8WXF1	PSPC1	Paraspeckle component 1 (Paraspeckle protein 1)
Q5H918	HTATSF1	HIV Tat-specific factor 1 (Fragment)
M0QY05	CD22	B-cell receptor CD22 (Fragment)
Q8N9V6	ANKRD53	Ankyrin repeat domain-containing protein 53
Q9NQ94	A1CF	APOBEC1 complementation factor (APOBEC1-stimulating protein)
R4GNA5	YME1L1	ATP-dependent zinc metalloprotease YME1L1 (Fragment)
Q7RTN6	STRADA	STE20-related kinase adapter protein alpha (STRAD alpha) (STE20-related adapter protein) (Serologically defined breast cancer antigen NY-BR-96)
Q5STU3	DDX39B	Spliceosome RNA helicase DDX39B
H3BMQ5	DDX19B	ATP-dependent RNA helicase DDX19B (Fragment)
M0R300	MYO9B	Unconventional myosin-IXb (Fragment)
F6RJM5	RPS6KC1	Ribosomal protein S6 kinase delta-1
A0A0A0MTK4	SYT14	Synaptotagmin-14 (Fragment)
P01721	IGLV6-57	Immunoglobulin lambda variable 6-57 (Ig lambda chain V-VI region AR) (Ig lambda chain V-VI region EB4) (Ig lambda chain V-VI region NIG-48) (Ig lambda chain V-VI region SUT) (Ig lambda chain V-VI region WLT)
A0A0B4J1U3	IGLV1-36	Immunoglobulin lambda variable 1-36
M0R1Q9	PLA2G6	85/88 kDa calcium-independent phospholipase A2 (Fragment)
C9JEA7	PLCD4	Phosphoinositide phospholipase C (EC 3.1.4.11)
D6RCB1	MAPK10	Mitogen-activated protein kinase (EC 2.7.11.24)
E7ENH5	CPNE1	Copine-1
M0QZR9	ELAVL1	ELAV-like protein 1
E7ET86	CDKL3	Cyclin-dependent kinase-like 3
F5H1B8	PLEKHB1	Pleckstrin homology domain-containing family B member 1 (Fragment)
A0A087WZV8		Deleted.
P36542	ATP5F1C	ATP synthase subunit gamma, mitochondrial (ATP synthase F1 subunit gamma) (F-ATPase gamma subunit)
M0QY31	PSG4	Pregnancy-specific beta-1-glycoprotein 4 (Fragment)
K7ELB6	CNTD1	Cyclin N-terminal domain-containing protein 1 (Fragment)
A0A087WZU1	PTPRQ	Phosphatidylinositol phosphatase PTPRQ
E9PQ35	CCT3	T-complex protein 1 subunit gamma (Fragment)
Q8N9W6	BOLL	Protein boule-like
Q9GZU7	CTDSP1	Carboxy-terminal domain RNA polymerase II polypeptide A small phosphatase 1 (EC 3.1.3.16) (Nuclear LIM interactor-interacting factor 3) (NLI-IF) (NLI-interacting factor 3) (Small C-terminal domain phosphatase 1) (SCP1) (Small CTD phosphatase 1)
J3KRK0	TLK2	Serine/threonine-protein kinase tousled-like 2 (Fragment)
A0A0C4DH72	IGKV1-6	Immunoglobulin kappa variable 1-6
A1L390	PLEKHG3	Pleckstrin homology domain-containing family G member 3 (PH domain-containing family G member 3)
H3BP53	GBP3	Guanylate-binding protein 3
E5RGM0	RIMS1	Regulating synaptic membrane exocytosis protein 1 (Fragment)
C9JQR6	PTK7	Inactive tyrosine-protein kinase 7 (Fragment)
J3QR49	MAP2K3	Dual-specificity mitogen-activated protein kinase kinase 3
C9J798	RASA4B	Ras GTPase-activating protein 4B
J3QSF4	RAB15	Ras-related protein Rab-15 (Fragment)
Q70J99	UNC13D	Protein unc-13 homolog D (Munc13-4)
X6RHF8	PDIK1L	Serine/threonine-protein kinase PDIK1L (Fragment)
K7EMP1	CC2D1A	Coiled-coil and C2 domain-containing protein 1A (Fragment)
A0A140T9W2	HLA-C	HLA class I histocompatibility antigen, Cw-6 alpha chain
P16189	HLA-A	HLA class I histocompatibility antigen, A-31 alpha chain (MHC class I antigen A*31)
A0A0U1RR14	CSNK1G1	Casein kinase I isoform gamma-1 (Fragment)
K7ER87	PTPN2	Tyrosine-protein phosphatase (EC 3.1.3.48)
X6RFL8	RAB14	Ras-related protein Rab-14 (Fragment)
V9GYD9	CELF2	CUGBP Elav-like family member 2
Q9NTZ6	RBM12	RNA-binding protein 12 (RNA-binding motif protein 12) (SH3/WW domain anchor protein in the nucleus) (SWAN)
Q5HYI5	DKFZp313C1541	Uncharacterized protein DKFZp313C1541
A6NEQ0	RBMY1E	RNA-binding motif protein, Y chromosome, family 1 member E
Q14449	GRB14	Growth factor receptor-bound protein 14 (GRB14 adapter protein)
H0Y718	KIF6	Kinesin-like protein (Fragment)
Q12982	BNIP2	BCL2/adenovirus E1B 19 kDa protein-interacting protein 2
A0A0G2JSC0	IGLV5-45	Immunoglobulin lambda variable 5-45 (Fragment)
A0A0D9SGI4	MELK	Maternal embryonic leucine zipper kinase (Fragment)
Q9HA65	TBC1D17	TBC1 domain family member 17
P30679	GNA15	Guanine nucleotide-binding protein subunit alpha-15 (G alpha-15) (G-protein subunit alpha-15) (Epididymis tissue protein Li 17E) (Guanine nucleotide-binding protein subunit alpha-16) (G alpha-16) (G-protein subunit alpha-16)
E9PM09	CCT3	T-complex protein 1 subunit gamma (Fragment)
A0A140T986	MICA	MHC class I polypeptide-related sequence A
H7C3X8	SIK3	Serine/threonine-protein kinase SIK3 (Fragment)
Q14240	EIF4A2	Eukaryotic initiation factor 4A-II (eIF-4A-II) (eIF4A-II) (EC 3.6.4.13) (ATP-dependent RNA helicase eIF4A-2)
B4DJX4	PLEKHA5	Pleckstrin homology domain-containing family A member 5 (cDNA FLJ59284, highly similar to Pleckstrin homology domain-containing family A member 5) (Fragment)
A0A075B6H8	IGKV1D-42	Immunoglobulin kappa variable 1D-42 (non-functional) (Fragment)
H0Y4H1	PTPRF	Receptor-type tyrosine-protein phosphatase F (Fragment)
J3QRG3	SKAP1	Src kinase-associated phosphoprotein 1 (Fragment)
I3L518	NUBP1	Cytosolic Fe-S cluster assembly factor NUBP1 (Fragment)
Q13151	HNRNPA0	Heterogeneous nuclear ribonucleoprotein A0 (hnRNP A0)
A4D1S5	RAB19	Ras-related protein Rab-19
A0A0J9YYE9	TRBC1	T-cell receptor beta-1 chain C region (Fragment)
Q7Z2E3	APTX	Aprataxin (EC 3.1.11.7) (EC 3.1.12.2) (Forkhead-associated domain histidine triad-like protein) (FHA-HIT)
P30490	HLA-B	HLA class I histocompatibility antigen, B-52 alpha chain (Bw-52) (HLA class I histocompatibility antigen, B-5 alpha chain) (MHC class I antigen B*52)
H3BSG9	PLA2G4F	Cytosolic phospholipase A2 zeta
Q86WI1	PKHD1L1	Fibrocystin-L (Polycystic kidney and hepatic disease 1-like protein 1) (PKHD1-like protein 1)
O43143	DHX15	Pre-mRNA-splicing factor ATP-dependent RNA helicase DHX15 (EC 3.6.4.13) (ATP-dependent RNA helicase #46) (DEAH box protein 15)
H3BVB2	ATP2A1	Sarcoplasmic/endoplasmic reticulum calcium ATPase 1 (Fragment)
P01762	IGHV3-11	Immunoglobulin heavy variable 3-11 (Ig heavy chain V-III region TRO)
A0A0A0MS59	SRCAP	Helicase SRCAP
Q5SZL4	TBC1D7	TBC1 domain family member 7 (Fragment)
A6NKZ9	TIAL1	Nucleolysin TIAR
R4GNI4	ARHGAP19	Rho GTPase-activating protein 19 (Fragment)
Q9NUL7	DDX28	Probable ATP-dependent RNA helicase DDX28 (EC 3.6.4.13) (Mitochondrial DEAD box protein 28)
Q8WXI2	CNKSR2	Connector enhancer of kinase suppressor of ras 2 (Connector enhancer of KSR 2) (CNK homolog protein 2) (CNK2)
O95741	CPNE6	Copine-6 (Copine VI) (Neuronal-copine) (N-copine)
A0A075B7B5	SRGAP2	SLIT-ROBO Rho GTPase-activating protein 2
K7EJW4	CELF4	CUGBP Elav-like family member 4 (Fragment)
M0QZS0	ARHGEF18	Rho guanine nucleotide exchange factor 18 (Fragment)
H3BTH5	KIF22	Kinesin-like protein KIF22 (Fragment)
A0A0G2JRG8	ARHGAP27	Rho GTPase-activating protein 27
P16066	NPR1	Atrial natriuretic peptide receptor 1 (EC 4.6.1.2) (Atrial natriuretic peptide receptor type A) (ANP-A) (ANPR-A) (NPR-A) (Guanylate cyclase A) (GC-A)
P52732	KIF11	Kinesin-like protein KIF11 (Kinesin-like protein 1) (Kinesin-like spindle protein HKSP) (Kinesin-related motor protein Eg5) (Thyroid receptor-interacting protein 5) (TR-interacting protein 5) (TRIP-5)
P05534	HLA-A	HLA class I histocompatibility antigen, A-24 alpha chain (Aw-24) (HLA class I histocompatibility antigen, A-9 alpha chain) (MHC class I antigen A*24)
Q96J87	CELF6	CUGBP Elav-like family member 6 (CELF-6) (Bruno-like protein 6) (CUG-BP- and ETR-3-like factor 6) (RNA-binding protein BRUNOL-6)
Q8IXF0	NPAS3	Neuronal PAS domain-containing protein 3 (Neuronal PAS3) (Basic-helix-loop-helix-PAS protein MOP6) (Class E basic helix-loop-helix protein 12) (bHLHe12) (Member of PAS protein 6) (PAS domain-containing protein 6)
C9JWZ7	KIF9	Kinesin-like protein KIF9 (Fragment)
A0A0A6YYK1	TRAV8-1	T cell receptor alpha variable 8-1
A8MXF1	PTPN5	Tyrosine-protein phosphatase non-receptor type 5
J3QSH2	CCNL2	Cyclin-L2 (Fragment)
H3BPE7	FUS	RNA-binding protein FUS
F8W8I6	TIA1	Nucleolysin TIA-1 isoform p40
A0A140T981	HLA-DQB1	HLA class II histocompatibility antigen, DQ beta 1 chain (Fragment)
O60486	PLXNC1	Plexin-C1 (Virus-encoded semaphorin protein receptor) (CD antigen CD232)
A0A0G2JJE4	MOG	Myelin-oligodendrocyte glycoprotein (Fragment)
J3KSK7	MPRIP	Myosin phosphatase Rho-interacting protein (Fragment)
Q9H2B2	SYT4	Synaptotagmin-4 (Synaptotagmin IV) (SytIV)
C9J9N2	EPAS1	Endothelial PAS domain-containing protein 1 (Fragment)
Q3MJ16	PLA2G4E	Cytosolic phospholipase A2 epsilon (cPLA2-epsilon) (EC 3.1.1.4) (Phospholipase A2 group IVE)
F8VZQ1	PFKM	ATP-dependent 6-phosphofructokinase, muscle type (Fragment)
Q9Y5S2	CDC42BPB	Serine/threonine-protein kinase MRCK beta (EC 2.7.11.1) (CDC42-binding protein kinase beta) (CDC42BP-beta) (DMPK-like beta) (Myotonic dystrophy kinase-related CDC42-binding kinase beta) (MRCK beta) (Myotonic dystrophy protein kinase-like beta)
B4DHA8	CELF4	CUGBP Elav-like family member 4 (cDNA FLJ54925, highly similar to Mus musculus bruno-like 4, RNA binding protein (Drosophila) (Brunol4), mRNA)
Q6PID9	ACAN	Aggrecan (Aggrecan core protein)
A0A0U1RQT1	ACAP2	Arf-GAP with coiled-coil, ANK repeat and PH domain-containing protein 2 (Fragment)
Q96JA3	PLEKHA8	Pleckstrin homology domain-containing family A member 8 (PH domain-containing family A member 8) (Phosphatidylinositol-four-phosphate adapter protein 2) (FAPP-2) (Phosphoinositol 4-phosphate adapter protein 2) (hFAPP2) (Serologically defined breast cancer antigen NY-BR-86)
A0A140T9U1	HLA-DPA1	HLA class II histocompatibility antigen, DP alpha 1 chain (Fragment)
Q6WKZ4	RAB11FIP1	Rab11 family-interacting protein 1 (Rab11-FIP1) (Rab-coupling protein)
E9PES4	KIF3A	Kinesin-like protein
Q92502	STARD8	StAR-related lipid transfer protein 8 (Deleted in liver cancer 3 protein) (DLC-3) (START domain-containing protein 8) (StARD8) (START-GAP3)
H3BTV3	FEM1B	Protein fem-1 homolog B (Fragment)
G3V4I6	AKT1	RAC-alpha serine/threonine-protein kinase (Fragment)
J3KRP2	PSMC5	26S proteasome regulatory subunit 8 (Fragment)
E7EVP8	AKT2	RAC-beta serine/threonine-protein kinase (Fragment)
H0YB39	HNRNPH1	Heterogeneous nuclear ribonucleoprotein H (Fragment)
A0A140T9X6	HLA-F	HLA class I histocompatibility antigen, alpha chain F (Fragment)
E7ETG2	ERN2	Serine/threonine-protein kinase/endoribonuclease IRE2
Q8N4G2	ARL14	ADP-ribosylation factor-like protein 14 (ADP-ribosylation factor 7)
Q6A1A2	PDPK2P	Putative 3-phosphoinositide-dependent protein kinase 2 (EC 2.7.11.1) (3-phosphoinositide-dependent protein kinase 2 pseudogene)
P51149	RAB7A	Ras-related protein Rab-7a
Q9BUF5	TUBB6	Tubulin beta-6 chain (Tubulin beta class V)
A0A0C4DG09	CADM3	Cell adhesion molecule 3 (Fragment)
Q9Y6Q9	NCOA3	Nuclear receptor coactivator 3 (NCoA-3) (EC 2.3.1.48) (ACTR) (Amplified in breast cancer 1 protein) (AIB-1) (CBP-interacting protein) (pCIP) (Class E basic helix-loop-helix protein 42) (bHLHe42) (Receptor-associated coactivator 3) (RAC-3) (Steroid receptor coactivator protein 3) (SRC-3) (Thyroid hormone receptor activator molecule 1) (TRAM-1)
F5H3L4	PLCZ1	1-phosphatidylinositol 4,5-bisphosphate phosphodiesterase zeta-1
D6RBW0	CENPE	Centromere-associated protein E (Fragment)
Q9P212	PLCE1	1-phosphatidylinositol 4,5-bisphosphate phosphodiesterase epsilon-1 (EC 3.1.4.11) (Pancreas-enriched phospholipase C) (Phosphoinositide phospholipase C-epsilon-1) (Phospholipase C-epsilon-1) (PLC-epsilon-1)
A0A0A0MTT3	CELF4	CUGBP Elav-like family member 4
J3KPQ0	FGFR4	Fibroblast growth factor receptor (EC 2.7.10.1)
P23258	TUBG1	Tubulin gamma-1 chain (Gamma-1-tubulin) (Gamma-tubulin complex component 1) (GCP-1)
Q4VX76	SYTL3	Synaptotagmin-like protein 3 (Exophilin-6)
H0Y6C7	IFT27	Intraflagellar transport protein 27 homolog (Fragment)
Q71U36	TUBA1A	Tubulin alpha-1A chain (Alpha-tubulin 3) (Tubulin B-alpha-1) (Tubulin alpha-3 chain) [Cleaved into: Detyrosinated tubulin alpha-1A chain]
C9JY13	HHLA2	HERV-H LTR-associating protein 2 (Fragment)
H7C3L9	MERTK	Tyrosine-protein kinase Mer (Fragment)
Q6ZW61	BBS12	Bardet-Biedl syndrome 12 protein
P30491	HLA-B	HLA class I histocompatibility antigen, B-53 alpha chain (Bw-53) (MHC class I antigen B*53)
P03989	HLA-B	HLA class I histocompatibility antigen, B-27 alpha chain (MHC class I antigen B*27)
D6RA44	CDK18	Cyclin-dependent kinase 18 (Fragment)
Q5JR07	RHOC	Rho-related GTP-binding protein RhoC (Fragment)
H0Y7V8	CDC42BPA	Serine/threonine-protein kinase MRCK alpha (Fragment)
P01112	HRAS	GTPase HRas (H-Ras-1) (Ha-Ras) (Transforming protein p21) (c-H-ras) (p21ras) [Cleaved into: GTPase HRas, N-terminally processed]
M0QYN1	FCGRT	IgG receptor FcRn large subunit p51 (Fragment)
Q9NP31	SH2D2A	SH2 domain-containing protein 2A (SH2 domain-containing adapter protein) (T cell-specific adapter protein) (TSAd) (VEGF receptor-associated protein)
F5H2J1	MYO3B	Myosin-IIIb (Fragment)
A0A1B0GV47	KIF21A	Kinesin-like protein KIF21A (Fragment)
I3L1D4	RBFOX1	RNA-binding protein fox-1 homolog 1 (Fragment)
H7C5S1	NFKBIZ	NF-kappa-B inhibitor zeta (Fragment)
P30450	HLA-A	HLA class I histocompatibility antigen, A-26 alpha chain (MHC class I antigen A*26)
A0A0G2JRD1	RBFOX2	RNA-binding protein fox-1 homolog 2 (Fragment)
Q9HC10	OTOF	Otoferlin (Fer-1-like protein 2)
Q53RE8	ANKRD39	Ankyrin repeat domain-containing protein 39
Q9Y242	TCF19	Transcription factor 19 (TCF-19) (Transcription factor SC1)
P41002	CCNF	Cyclin-F (F-box only protein 1)
Q5TFQ8	SIRPB1	Signal-regulatory protein beta-1 isoform 3 (SIRP-beta-1 isoform 3)
P19784	CSNK2A2	Casein kinase II subunit alpha' (CK II alpha') (EC 2.7.11.1)
E5RGN6	IPCEF1	Interactor protein for cytohesin exchange factors 1 (Fragment)
F5H4R1	MAP3K4	Mitogen-activated protein kinase kinase kinase 4
A0A0G2JNZ7	DDR1	Epithelial discoidin domain-containing receptor 1
H3BUW0	SIRPB1	Signal-regulatory protein beta-1 (Fragment)
E9PRX0	RAB30	Ras-related protein Rab-30 (Fragment)
I3L2E4	ARL17B	ADP-ribosylation factor-like protein 17
P40198	CEACAM3	Carcinoembryonic antigen-related cell adhesion molecule 3 (Carcinoembryonic antigen CGM1) (CD antigen CD66d)
H0YJB1	TSSK4	Testis-specific serine/threonine-protein kinase 4 (Fragment)
Q13424	SNTA1	Alpha-1-syntrophin (59 kDa dystrophin-associated protein A1 acidic component 1) (Pro-TGF-alpha cytoplasmic domain-interacting protein 1) (TACIP1) (Syntrophin-1)
H0Y4V6	CHEK2	Serine/threonine-protein kinase Chk2 (Fragment)
Q8TDC3	BRSK1	Serine/threonine-protein kinase BRSK1 (EC 2.7.11.1) (Brain-selective kinase 1) (EC 2.7.11.26) (Brain-specific serine/threonine-protein kinase 1) (BR serine/threonine-protein kinase 1) (Serine/threonine-protein kinase SAD-B) (Synapses of Amphids Defective homolog 1) (SAD1 homolog) (hSAD1)
Q96MF2	STAC3	SH3 and cysteine-rich domain-containing protein 3
E7ERX9	KIF13B	Kinesin-like protein
G3V3R4	TUBB3	HCG1983504, isoform CRA_c (Tubulin beta-3 chain)
A0A140T9X5	HLA-A	HLA class I histocompatibility antigen, A-3 alpha chain (Fragment)
Q99466	NOTCH4	Neurogenic locus notch homolog protein 4 (Notch 4) (hNotch4) [Cleaved into: Notch 4 extracellular truncation; Notch 4 intracellular domain]
A0A0A0MRY8	NEK10	Serine/threonine-protein kinase Nek10
P49841	GSK3B	Glycogen synthase kinase-3 beta (GSK-3 beta) (EC 2.7.11.26) (Serine/threonine-protein kinase GSK3B) (EC 2.7.11.1)
A0A0D9SG12	DDX3X	ATP-dependent RNA helicase DDX3X
Q5JWF2	GNAS	Guanine nucleotide-binding protein G(s) subunit alpha isoforms XLas (Adenylate cyclase-stimulating G alpha protein) (Extra large alphas protein) (XLalphas)
H3BTM2	GNAO1	Guanine nucleotide-binding protein G(o) subunit alpha (Fragment)
Q8N4Z0	RAB42	Ras-related protein Rab-42
O15264	MAPK13	Mitogen-activated protein kinase 13 (MAP kinase 13) (MAPK 13) (EC 2.7.11.24) (Mitogen-activated protein kinase p38 delta) (MAP kinase p38 delta) (Stress-activated protein kinase 4)
H0YGL5	STYK1	Tyrosine-protein kinase STYK1 (Fragment)
H0YKP1	CPNE6	Copine-6 (Fragment)
P0DMR1	HNRNPCL4	Heterogeneous nuclear ribonucleoprotein C-like 4
D6RA03	RIMS2	Regulating synaptic membrane exocytosis protein 2
Q8IUW1	ANKRD10	ANKRD10 protein (Ankyrin repeat domain-containing protein 10)
A6NJG2	SOWAHD	Ankyrin repeat domain-containing protein SOWAHD (Ankyrin repeat domain-containing protein 58) (Protein sosondowah homolog D)
K7ERW7	SGK494	Uncharacterized serine/threonine-protein kinase SgK494 (Fragment)
F5GXV1	NOL8	Nucleolar protein 8
Q8IYU2	HACE1	E3 ubiquitin-protein ligase HACE1 (EC 2.3.2.26) (HECT domain and ankyrin repeat-containing E3 ubiquitin-protein ligase 1) (HECT-type E3 ubiquitin transferase HACE1)
A0A0A0MS07	IGHG1	Immunoglobulin heavy constant gamma 1 (Fragment)
P0C7Q3	FAM58BP	Putative cyclin-related protein FAM58B
A0A0D9SG19		Deleted.
F8VVE3	PFKM	ATP-dependent 6-phosphofructokinase, muscle type (Fragment)
A5PLK6	RGSL1	Regulator of G-protein signaling protein-like
P98077	SHC2	SHC-transforming protein 2 (Protein Sck) (SHC-transforming protein B) (Src homology 2 domain-containing-transforming protein C2) (SH2 domain protein C2)
J3QKT5	MSI2	RNA-binding protein Musashi homolog 2
X1WI22	SAR1A	GTP-binding protein SAR1a (Fragment)
A0A087X121	DDX52	Probable ATP-dependent RNA helicase DDX52 (Fragment)
C9J867	NME6	Nucleoside diphosphate kinase 6 (Fragment)
P30505	HLA-C	HLA class I histocompatibility antigen, Cw-8 alpha chain (MHC class I antigen Cw*8)
Q8WZ74	CTTNBP2	Cortactin-binding protein 2 (CortBP2)
Q8N264	ARHGAP24	Rho GTPase-activating protein 24 (Filamin-A-associated RhoGAP) (FilGAP) (RAC1- and CDC42-specific GTPase-activating protein of 72 kDa) (RC-GAP72) (Rho-type GTPase-activating protein 24) (RhoGAP of 73 kDa) (Sarcoma antigen NY-SAR-88) (p73RhoGAP)
J3KPQ4	ARHGAP9	Rho GTPase activating protein 9, isoform CRA_a (Rho GTPase-activating protein 9)
H0Y9Z7	KIF13A	Kinesin-like protein KIF13A (Fragment)
B3KNX7	PAK1	Non-specific serine/threonine protein kinase (EC 2.7.11.1)
F5GY87	PLEKHB1	Pleckstrin homology domain-containing family B member 1 (Fragment)
F8VP99	ARL1	ADP-ribosylation factor-like protein 1 (Fragment)
A0A5B9	TRBC2	T-cell receptor beta-2 chain C region
I3L4X3	NFKBIB	NF-kappa-B inhibitor beta (Fragment)
J3QSG8	KSR1	Kinase suppressor of Ras 1
Q15635	USP6	Oncogene (Ubiquitin carboxyl-terminal hydrolase 6)
R4GNG3	GIT2	ARF GTPase-activating protein GIT2 (Fragment)
Q96RR4	CAMKK2	Calcium/calmodulin-dependent protein kinase kinase 2 (CaM-KK 2) (CaM-kinase kinase 2) (CaMKK 2) (EC 2.7.11.17) (Calcium/calmodulin-dependent protein kinase kinase beta) (CaM-KK beta) (CaM-kinase kinase beta) (CaMKK beta)
Q29718	HLA-B	HLA class I histocompatibility antigen, B-82 alpha chain (MHC class I antigen B*82)
E7EX83	MAP4K4	Mitogen-activated protein kinase kinase kinase kinase 4
H3BSX1	SYT17	Synaptotagmin-17
Q5SQY0	TUBB8	Tubulin beta chain
H0YGN5		Uncharacterized protein (Fragment)
Q96AX2	RAB37	Ras-related protein Rab-37
Q01151	CD83	CD83 antigen (hCD83) (B-cell activation protein) (Cell surface protein HB15) (CD antigen CD83)
J3QL43	EIF4A1	Eukaryotic initiation factor 4A-I (Fragment)
H3BRE4	CLK3	Dual-specificity protein kinase CLK3 (Fragment)
A0A0J9YYL3	PUF60	Poly(U)-binding-splicing factor PUF60 (Fragment)
Q5VW22	AGAP6	Arf-GAP with GTPase, ANK repeat and PH domain-containing protein 6 (AGAP-6) (Centaurin-gamma-like family member 3)
A0A140T9N4	HLA-DMA	HLA class II histocompatibility antigen, DM alpha chain (Fragment)
Q9H1H9	KIF13A	Kinesin-like protein KIF13A (Kinesin-like protein RBKIN)
C9J840	MAP4K4	Mitogen-activated protein kinase kinase kinase kinase 4
P98194	ATP2C1	Calcium-transporting ATPase type 2C member 1 (ATPase 2C1) (EC 3.6.3.8) (ATP-dependent Ca(2+) pump PMR1)
Q05513	PRKCZ	Protein kinase C zeta type (EC 2.7.11.13) (nPKC-zeta)
Q96HS1	PGAM5	Serine/threonine-protein phosphatase PGAM5, mitochondrial (EC 3.1.3.16) (Bcl-XL-binding protein v68) (Phosphoglycerate mutase family member 5)
O60333	KIF1B	Kinesin-like protein KIF1B (Klp)
B3VCF5	CHN2	Beta chimaerin isoform B1-CHNdel ex10-11 (Beta-chimaerin)
O00750	PIK3C2B	Phosphatidylinositol 4-phosphate 3-kinase C2 domain-containing subunit beta (PI3K-C2-beta) (PtdIns-3-kinase C2 subunit beta) (EC 2.7.1.154) (C2-PI3K) (Phosphoinositide 3-kinase-C2-beta)
A8MWG7	MAP3K19	Mitogen-activated protein kinase kinase kinase 19
P05129	PRKCG	Protein kinase C gamma type (PKC-gamma) (EC 2.7.11.13)
P57729	RAB38	Ras-related protein Rab-38 (Melanoma antigen NY-MEL-1)
Q86YV6	MYLK4	Myosin light chain kinase family member 4 (EC 2.7.11.1) (Sugen kinase 85) (SgK085)
A0A1C7CYZ0	ABR	Active breakpoint cluster region-related protein
Q8IYT8	ULK2	Serine/threonine-protein kinase ULK2 (EC 2.7.11.1) (Unc-51-like kinase 2)
Q4JDL3	PTPN20	Tyrosine-protein phosphatase non-receptor type 20 (hPTPN20) (EC 3.1.3.48)
C9JBI3	PSPH	Phosphoserine phosphatase (Fragment)
Q9HCM2	PLXNA4	Plexin-A4
Q9ULH1	ASAP1	Arf-GAP with SH3 domain, ANK repeat and PH domain-containing protein 1 (130 kDa phosphatidylinositol 4,5-bisphosphate-dependent ARF1 GTPase-activating protein) (ADP-ribosylation factor-directed GTPase-activating protein 1) (ARF GTPase-activating protein 1) (Development and differentiation-enhancing factor 1) (DEF-1) (Differentiation-enhancing factor 1) (PIP2-dependent ARF1 GAP)
P05023	ATP1A1	Sodium/potassium-transporting ATPase subunit alpha-1 (Na(+)/K(+) ATPase alpha-1 subunit) (EC 3.6.3.9) (Sodium pump subunit alpha-1)
Q8TAD8	SNIP1	Smad nuclear-interacting protein 1 (FHA domain-containing protein SNIP1)
H0YI74	ZDHHC17	Palmitoyltransferase ZDHHC17 (Fragment)
P31152	MAPK4	Mitogen-activated protein kinase 4 (MAP kinase 4) (MAPK 4) (EC 2.7.11.24) (Extracellular signal-regulated kinase 4) (ERK-4) (MAP kinase isoform p63) (p63-MAPK)
Q29940	HLA-B	HLA class I histocompatibility antigen, B-59 alpha chain (MHC class I antigen B*59)
O14522	PTPRT	Receptor-type tyrosine-protein phosphatase T (R-PTP-T) (EC 3.1.3.48) (Receptor-type tyrosine-protein phosphatase rho) (RPTP-rho)
C9JIC6	RANBP1	Ran-specific GTPase-activating protein (Fragment)
I3L0L3	NSF	Vesicle-fusing ATPase (Fragment)
O43318	MAP3K7	Mitogen-activated protein kinase kinase kinase 7 (EC 2.7.11.25) (Transforming growth factor-beta-activated kinase 1) (TGF-beta-activated kinase 1)
Q14183	DOC2A	Double C2-like domain-containing protein alpha (Doc2) (Doc2-alpha)
Q96H35	RBM18	Probable RNA-binding protein 18 (RNA-binding motif protein 18)
P01766	IGHV3-13	Immunoglobulin heavy variable 3-13 (Ig heavy chain V-III region BRO)
P0DJD0	RGPD1	RANBP2-like and GRIP domain-containing protein 1 (Ran-binding protein 2-like 6) (RanBP2-like 6) (RanBP2L6)
H0Y7C1	ATP1A2	Sodium/potassium-transporting ATPase subunit alpha (EC 3.6.3.-) (Fragment)
Q00889	PSG6	Pregnancy-specific beta-1-glycoprotein 6 (PS-beta-G-6) (PSBG-6) (Pregnancy-specific glycoprotein 6) (Pregnancy-specific beta-1-glycoprotein 10) (PS-beta-G-10) (PSBG-10) (Pregnancy-specific glycoprotein 10) (Pregnancy-specific beta-1-glycoprotein 12) (PS-beta-G-12) (PSBG-12) (Pregnancy-specific glycoprotein 12)
Q9HCD6	TANC2	Protein TANC2 (Tetratricopeptide repeat, ankyrin repeat and coiled-coil domain-containing protein 2)
A0A1B0GUW5	RBMS3	RNA-binding motif, single-stranded-interacting protein 3 (Fragment)
E5RH24	PABPC1	Polyadenylate-binding protein 1 (Fragment)
Q9NYZ4	SIGLEC8	Sialic acid-binding Ig-like lectin 8 (Siglec-8) (Sialoadhesin family member 2) (SAF-2)
E9PQH6	RHOC	Rho-related GTP-binding protein RhoC (Fragment)
P49336	CDK8	Cyclin-dependent kinase 8 (EC 2.7.11.22) (EC 2.7.11.23) (Cell division protein kinase 8) (Mediator complex subunit CDK8) (Mediator of RNA polymerase II transcription subunit CDK8) (Protein kinase K35)
O14795	UNC13B	Protein unc-13 homolog B (Munc13-2) (munc13)
A0A140T9T2	HLA-DMA	HLA class II histocompatibility antigen, DM alpha chain (Fragment)
Q99640	PKMYT1	Membrane-associated tyrosine- and threonine-specific cdc2-inhibitory kinase (EC 2.7.11.1) (Myt1 kinase)
E5RI94	TBC1D31	TBC1 domain family member 31
Q9Y5B8	NME7	Nucleoside diphosphate kinase 7 (NDK 7) (NDP kinase 7) (EC 2.7.4.6) (nm23-H7)
Q8WYA1	ARNTL2	Aryl hydrocarbon receptor nuclear translocator-like protein 2 (Basic-helix-loop-helix-PAS protein MOP9) (Brain and muscle ARNT-like 2) (CYCLE-like factor) (CLIF) (Class E basic helix-loop-helix protein 6) (bHLHe6) (Member of PAS protein 9) (PAS domain-containing protein 9)
F6RAZ1	PFKFB2	6-phosphofructo-2-kinase/fructose-2,6-bisphosphatase 2 (Fragment)
M0R0N9	ANKRD24	Ankyrin repeat domain-containing protein 24 (Fragment)
Q8MH48	HLA-G	HLA class I histocompatibility antigen, alpha chain G (MHC class I antigen) (MHC class Ib antigen)
C9J8E1	MAPKAPK3	MAP kinase-activated protein kinase 3 (Fragment)
H0YF12	PTPN11	Tyrosine-protein phosphatase non-receptor type 11 (Fragment)
P28370	SMARCA1	Probable global transcription activator SNF2L1 (EC 3.6.4.-) (ATP-dependent helicase SMARCA1) (Nucleosome-remodeling factor subunit SNF2L) (SWI/SNF-related matrix-associated actin-dependent regulator of chromatin subfamily A member 1)
Q99832	CCT7	T-complex protein 1 subunit eta (TCP-1-eta) (CCT-eta) (HIV-1 Nef-interacting protein) [Cleaved into: T-complex protein 1 subunit eta, N-terminally processed]
A0A0G2JJV3	HLA-DPB1	HLA class II histocompatibility antigen, DP beta 1 chain
A0A075B6Q0	RAP1A	Ras-related protein Rap-1A (Fragment)
K7ERP6	PRKACA	cAMP-dependent protein kinase catalytic subunit alpha (Fragment)
A0A0D9SEN2	CDK11B	Cyclin-dependent kinase 11B
Q06547	GABPB1	GA-binding protein subunit beta-1 (GABP subunit beta-1) (GABPB-1) (GABP subunit beta-2) (GABPB-2) (Nuclear respiratory factor 2) (Transcription factor E4TF1-47) (Transcription factor E4TF1-53)
A0A140T9Y4	HLA-DQB1	HLA class II histocompatibility antigen, DQ beta 1 chain (Fragment)
P35568	IRS1	Insulin receptor substrate 1 (IRS-1)
P78396	CCNA1	Cyclin-A1
A0A0D9SFU9	AGAP5	Arf-GAP with GTPase, ANK repeat and PH domain-containing protein 5
E9PSF1	RBM38	RNA-binding protein 38
A0A087WZT9	PSKH1	Serine/threonine-protein kinase H1
A0A075B6K2	IGLV3-12	Immunoglobulin lambda variable 3-12
G3V4W0	HNRNPC	Heterogeneous nuclear ribonucleoproteins C1/C2 (Fragment)
H7BXS4	CAMK2B	Calcium/calmodulin-dependent protein kinase type II subunit beta
Q8IWT1	SCN4B	Sodium channel subunit beta-4
P19174	PLCG1	1-phosphatidylinositol 4,5-bisphosphate phosphodiesterase gamma-1 (EC 3.1.4.11) (PLC-148) (Phosphoinositide phospholipase C-gamma-1) (Phospholipase C-II) (PLC-II) (Phospholipase C-gamma-1) (PLC-gamma-1)
A0A0G2JH46	HLA-DRA	HLA class II histocompatibility antigen, DR alpha chain
F8WAK2	GIT2	ARF GTPase-activating protein GIT2
P37173	TGFBR2	TGF-beta receptor type-2 (TGFR-2) (EC 2.7.11.30) (TGF-beta type II receptor) (Transforming growth factor-beta receptor type II) (TGF-beta receptor type II) (TbetaR-II)
H0YHR7	NUBPL	Iron-sulfur protein NUBPL (Fragment)
C9JFA1	STK25	Serine/threonine-protein kinase 25 (Fragment)
A0A140T9D8	MICB	MHC class I polypeptide-related sequence B
P63092	GNAS	Guanine nucleotide-binding protein G(s) subunit alpha isoforms short (Adenylate cyclase-stimulating G alpha protein)
Q8IV01	SYT12	Synaptotagmin-12 (Synaptotagmin XII) (SytXII)
H7C1P7	RAB17	Ras-related protein Rab-17 (Fragment)
S4R3C0		Uncharacterized protein (Fragment)
A0A0G2JMB4	TRBC2	T-cell receptor beta-2 chain C region (Fragment)
A0A0B4J244	TRAV3	T cell receptor alpha variable 3
G3V3K6	HNRNPC	Heterogeneous nuclear ribonucleoproteins C1/C2 (Fragment)
F5GXG4	PGAM5	Serine/threonine-protein phosphatase PGAM5, mitochondrial
F8WD15	IGF2BP3	Insulin-like growth factor 2 mRNA-binding protein 3
A0A087X1X2	PTPRT	Receptor-type tyrosine-protein phosphatase T
Q5T0B5	MUSK	Muscle, skeletal receptor tyrosine-protein kinase
D6REE7	ROCK2	Rho-associated protein kinase 2
P51813	BMX	Cytoplasmic tyrosine-protein kinase BMX (EC 2.7.10.2) (Bone marrow tyrosine kinase gene in chromosome X protein) (Epithelial and endothelial tyrosine kinase) (ETK) (NTK38)
K7EP59	STK11	Serine/threonine-protein kinase STK11
H0YIL2	RBM19	Probable RNA-binding protein 19 (Fragment)
P13747	HLA-E	HLA class I histocompatibility antigen, alpha chain E (MHC class I antigen E)
O95835	LATS1	Serine/threonine-protein kinase LATS1 (EC 2.7.11.1) (Large tumor suppressor homolog 1) (WARTS protein kinase) (h-warts)
M0R0K1	DDX49	DEAD (Asp-Glu-Ala-Asp) box polypeptide 49, isoform CRA_c (Probable ATP-dependent RNA helicase DDX49)
Q9BQG2	NUDT12	Peroxisomal NADH pyrophosphatase NUDT12 (EC 3.6.1.22) (Nucleoside diphosphate-linked moiety X motif 12) (Nudix motif 12)
Q8N4C8	MINK1	Misshapen-like kinase 1 (EC 2.7.11.1) (GCK family kinase MiNK) (MAPK/ERK kinase kinase kinase 6) (MEK kinase kinase 6) (MEKKK 6) (Misshapen/NIK-related kinase) (Mitogen-activated protein kinase kinase kinase kinase 6)
A0A140T9J4	HLA-DPA1	HLA class II histocompatibility antigen, DP alpha 1 chain (Fragment)
B7ZCA0	SYNGAP1	Ras/Rap GTPase-activating protein SynGAP (Fragment)
G5EA48	SRGAP1	SLIT-ROBO Rho GTPase activating protein 1, isoform CRA_a (SLIT-ROBO Rho GTPase-activating protein 1)
Q9UM73	ALK	ALK tyrosine kinase receptor (EC 2.7.10.1) (Anaplastic lymphoma kinase) (CD antigen CD246)
Q6P6B7	ANKRD16	Ankyrin repeat domain-containing protein 16
Q8WVV9	HNRNPLL	Heterogeneous nuclear ribonucleoprotein L-like (hnRNPLL) (Stromal RNA-regulating factor)
Q9H0T7	RAB17	Ras-related protein Rab-17
Q8TAM1	BBS10	Bardet-Biedl syndrome 10 protein
Q96A23	CPNE4	Copine-4 (Copine IV) (Copine-8)
Q9Y624	F11R	Junctional adhesion molecule A (JAM-A) (Junctional adhesion molecule 1) (JAM-1) (Platelet F11 receptor) (Platelet adhesion molecule 1) (PAM-1) (CD antigen CD321)
Q13188	STK3	Serine/threonine-protein kinase 3 (EC 2.7.11.1) (Mammalian STE20-like protein kinase 2) (MST-2) (STE20-like kinase MST2) (Serine/threonine-protein kinase Krs-1) [Cleaved into: Serine/threonine-protein kinase 3 36kDa subunit (MST2/N); Serine/threonine-protein kinase 3 20kDa subunit (MST2/C)]
F8VZR8	NUBPL	Iron-sulfur protein NUBPL
A0A075B6U4	TRAV7	T cell receptor alpha variable 7
A0A140T953	HLA-B	HLA class I histocompatibility antigen, B-46 alpha chain (Fragment)
H9KV90	SHANK1	SH3 and multiple ankyrin repeat domains protein 1
F5H676	TCP1	T-complex protein 1 subunit alpha (Fragment)
F6WQW2	RANBP1	Ran-specific GTPase-activating protein
P61204	ARF3	ADP-ribosylation factor 3
A0A140T9C7	HLA-DMA	HLA class II histocompatibility antigen, DM alpha chain (Fragment)
P01859	IGHG2	Immunoglobulin heavy constant gamma 2 (Ig gamma-2 chain C region) (Ig gamma-2 chain C region DOT) (Ig gamma-2 chain C region TIL) (Ig gamma-2 chain C region ZIE)
Q9ULI0	ATAD2B	ATPase family AAA domain-containing protein 2B
Q15238	PSG5	Pregnancy-specific beta-1-glycoprotein 5 (PS-beta-G-5) (PSBG-5) (Pregnancy-specific glycoprotein 5) (Fetal liver non-specific cross-reactive antigen 3) (FL-NCA-3)
M0R003	TIMM50	Mitochondrial import inner membrane translocase subunit TIM50 (Fragment)
A0A0G2JMG7		Deleted.
P01619	IGKV3-20	Immunoglobulin kappa variable 3-20 (Ig kappa chain V-III region B6) (Ig kappa chain V-III region GOL) (Ig kappa chain V-III region HAH) (Ig kappa chain V-III region HIC) (Ig kappa chain V-III region IARC/BL41) (Ig kappa chain V-III region NG9) (Ig kappa chain V-III region SIE) (Ig kappa chain V-III region Ti) (Ig kappa chain V-III region WOL)
H0YMP3	CCNB2	G2/mitotic-specific cyclin-B2
F2Z2J1	RPS6KA2	Ribosomal protein S6 kinase (EC 2.7.11.1)
P16190	HLA-A	HLA class I histocompatibility antigen, A-33 alpha chain (Aw-19) (Aw-33) (MHC class I antigen A*33)
H3BTI1	DOC2A	Double C2-like domain-containing protein alpha (Fragment)
Q5JX55	CPNE1	Copine-1 (Fragment)
O19617	HLA-C	HLA class I antigen (HLA class I histocompatibility antigen, Cw-6 alpha chain) (HLA-C protein) (MHC class I antigen) (Major histocompatibility complex, class I, C)
D6RDU3	HNRNPH1	Heterogeneous nuclear ribonucleoprotein H (Fragment)
A0A0B4J2B6	IGHV2OR16-5	Immunoglobulin heavy variable 2/OR16-5 (non-functional) (Fragment)
P01892	HLA-A	HLA class I histocompatibility antigen, A-2 alpha chain (MHC class I antigen A*2)
A0A140T9B0	HLA-DQB2	HLA class II histocompatibility antigen, DQ beta 2 chain (Fragment)
B7Z4Y8	BTNL9	Butyrophilin-like protein 9 (cDNA FLJ52190, highly similar to Butyrophilin-like protein 9)
A0A0C4DH55	IGKV3D-7	Immunoglobulin kappa variable 3D-7
A0A0B4J275	TRAV17	T cell receptor alpha variable 17
Q9P2N2	ARHGAP28	Rho GTPase-activating protein 28 (Rho-type GTPase-activating protein 28)
Q09160	HLA-A	HLA class I histocompatibility antigen, A-80 alpha chain (Aw-80) (HLA class I histocompatibility antigen, A-1 alpha chain) (MHC class I antigen A*80)
D6RER9	SH3BP2	SH3 domain-binding protein 2 (Fragment)
P02489	CRYAA	Alpha-crystallin A chain (Heat shock protein beta-4) (HspB4) [Cleaved into: Alpha-crystallin A(1-172); Alpha-crystallin A(1-168); Alpha-crystallin A(1-162)]
Q9HB19	PLEKHA2	Pleckstrin homology domain-containing family A member 2 (PH domain-containing family A member 2) (Tandem PH domain-containing protein 2) (TAPP-2)
E3W983	HACE1	E3 ubiquitin-protein ligase HACE1
A0A087WUW9	ARL15	ADP-ribosylation factor-like protein 15
Q9NQW6	ANLN	Anillin
B8ZZU1	CHN2	Beta-chimaerin (Fragment)
H0YJJ2	TDRD9	ATP-dependent RNA helicase TDRD9 (Fragment)
M0R1Y1	EVI5L	EVI5-like protein (Fragment)
Q9GZV1	ANKRD2	Ankyrin repeat domain-containing protein 2 (Skeletal muscle ankyrin repeat protein) (hArpp)
A0A0G2JPB1	HLA-C	HLA class I histocompatibility antigen, Cw-6 alpha chain
H3BMM9	RNPS1	RNA-binding protein with serine-rich domain 1 (Fragment)
E9PJF0	MAPK3	Mitogen-activated protein kinase (EC 2.7.11.24)
H7C4B3	ADAP1	Arf-GAP with dual PH domain-containing protein 1 (Fragment)
C9JUK9	MAPK7	Mitogen-activated protein kinase (EC 2.7.11.24) (Fragment)
A0A140T9H9	HLA-DQB1	HLA class II histocompatibility antigen, DQ beta 1 chain (Fragment)
Q30201	HFE	Hereditary hemochromatosis protein (HLA-H)
A0A087WYK2	WNK3	Serine/threonine-protein kinase WNK3
H0YMJ4	KIF23	Kinesin-like protein KIF23
P52790	HK3	Hexokinase-3 (EC 2.7.1.1) (Hexokinase type III) (HK III)
A6PVV2	WNK2	Serine/threonine-protein kinase WNK2 (Fragment)
O15381	NVL	Nuclear valosin-containing protein-like (NVLp) (Nuclear VCP-like protein)
P15259	PGAM2	Phosphoglycerate mutase 2 (EC 5.4.2.11) (EC 5.4.2.4) (BPG-dependent PGAM 2) (Muscle-specific phosphoglycerate mutase) (Phosphoglycerate mutase isozyme M) (PGAM-M)
O15524	SOCS1	Suppressor of cytokine signaling 1 (SOCS-1) (JAK-binding protein) (JAB) (STAT-induced STAT inhibitor 1) (SSI-1) (Tec-interacting protein 3) (TIP-3)
Q16513	PKN2	Serine/threonine-protein kinase N2 (EC 2.7.11.13) (PKN gamma) (Protein kinase C-like 2) (Protein-kinase C-related kinase 2)
Q9NYF5	FAM13B	Protein FAM13B (GAP-like protein N61)
C9JQQ5	ATL2	Atlastin-2 (Fragment)
O60658	PDE8A	High affinity cAMP-specific and IBMX-insensitive 3',5'-cyclic phosphodiesterase 8A (EC 3.1.4.53)
Q3MII6	TBC1D25	TBC1 domain family member 25
Q8NE63	HIPK4	Homeodomain-interacting protein kinase 4 (EC 2.7.11.1)
Q9H4B7	TUBB1	Tubulin beta-1 chain
A0A140T9I0	HLA-A	HLA class I histocompatibility antigen, A-3 alpha chain (Fragment)
P78310	CXADR	Coxsackievirus and adenovirus receptor (CAR) (hCAR) (CVB3-binding protein) (Coxsackievirus B-adenovirus receptor) (HCVADR)
Q9GJ45	HLA-A	HLA class I histocompatibility antigen, A-3 alpha chain (MHC class I antigen)
K7EQX4	CIRBP	Cold-inducible RNA-binding protein (Fragment)
Q12926	ELAVL2	ELAV-like protein 2 (ELAV-like neuronal protein 1) (Hu-antigen B) (HuB) (Nervous system-specific RNA-binding protein Hel-N1)
P35869	AHR	Aryl hydrocarbon receptor (Ah receptor) (AhR) (Class E basic helix-loop-helix protein 76) (bHLHe76)
H7C560	BRAF	Serine/threonine-protein kinase B-raf (Fragment)
P78314	SH3BP2	SH3 domain-binding protein 2 (3BP-2)
Q93084	ATP2A3	Sarcoplasmic/endoplasmic reticulum calcium ATPase 3 (SERCA3) (SR Ca(2+)-ATPase 3) (EC 3.6.3.8) (Calcium pump 3)
H7C367	NONO	Non-POU domain-containing octamer-binding protein (Fragment)
A0A0A6YYD5	TRBV12-3	T-cell receptor beta chain V region YT35 (Fragment)
P30453	HLA-A	HLA class I histocompatibility antigen, A-34 alpha chain (Aw-34) (HLA class I histocompatibility antigen, A-10 alpha chain) (MHC class I antigen A*34)
P61586	RHOA	Transforming protein RhoA (Rho cDNA clone 12) (h12)
E9PIY6	ARFGAP2	ADP-ribosylation factor GTPase-activating protein 2 (Fragment)
G3V4B2	ASB2	Ankyrin repeat and SOCS box protein 2 (Fragment)
H7C523	HHLA2	HERV-H LTR-associating protein 2 (Fragment)
O96017	CHEK2	Serine/threonine-protein kinase Chk2 (EC 2.7.11.1) (CHK2 checkpoint homolog) (Cds1 homolog) (Hucds1) (hCds1) (Checkpoint kinase 2)
B0QYI1	TBC1D22A	TBC1 domain family member 22A
D6RE65	CAMK4	Calcium/calmodulin-dependent protein kinase type IV (Fragment)
A0A140T9U0	HLA-C	HLA class I histocompatibility antigen, Cw-6 alpha chain
Q9UPY3	DICER1	Endoribonuclease Dicer (EC 3.1.26.3) (Helicase with RNase motif) (Helicase MOI)
Q8N7X1	RBMXL3	RNA-binding motif protein, X-linked-like-3
Q96SU4	OSBPL9	Oxysterol-binding protein-related protein 9 (ORP-9) (OSBP-related protein 9)
A0A087X0I8	AGAP6	Arf-GAP with GTPase, ANK repeat and PH domain-containing protein 6
B4E2Q0	ATP2C1	Calcium-transporting ATPase (EC 3.6.3.8)
Q99666	RGPD5; RGPD6	RANBP2-like and GRIP domain-containing protein 5/6 (Ran-binding protein 2-like 1/2) (RanBP2-like 1/2) (RanBP2L1) (RanBP2L2) (Sperm membrane protein BS-63)
G5E9L0	ARFGAP2	ADP-ribosylation factor GTPase-activating protein 2
E5RIF6	HAVCR1	Hepatitis A virus cellular receptor 1 (Fragment)
F8W6G5	APTX	Aprataxin (Fragment)
F8W8V9	KIF1A	Kinesin-like protein KIF1A (Fragment)
C9K0S6	TUBA8	Tubulin alpha-8 chain (Fragment)
O75449	KATNA1	Katanin p60 ATPase-containing subunit A1 (Katanin p60 subunit A1) (EC 3.6.4.3) (p60 katanin)
C9J4X2	NONO	Non-POU domain-containing octamer-binding protein (Fragment)
Q5JT88	SHPRH	E3 ubiquitin-protein ligase SHPRH (Fragment)
G3V174	ARHGAP32	Rho GTPase-activating protein 32 (Rho GTPase-activating protein, isoform CRA_b)
Q5TBH0	NEK6	Serine/threonine-protein kinase Nek6 (Fragment)
I3L0N3	NSF	Vesicle-fusing ATPase
P51955	NEK2	Serine/threonine-protein kinase Nek2 (EC 2.7.11.1) (HSPK 21) (Never in mitosis A-related kinase 2) (NimA-related protein kinase 2) (NimA-like protein kinase 1)
A0A0B4J248	TRAV1-1	T cell receptor alpha variable 1-1
E7ETM0	CSNK1A1	Casein kinase I isoform alpha				Ώw‘‡q6_x0019_ά°yrΎ;nyβaξ_x001F_’Ω¶].Ϋ	_x001F_ν­_x0002_Ι
O00478	BTN3A3	Butyrophilin subfamily 3 member A3
B1AR62	HK1	Phosphotransferase (EC 2.7.1.-) (Fragment)
F5H369	PIK3C2G	Phosphatidylinositol 4-phosphate 3-kinase C2 domain-containing subunit gamma
F8W8C9	VPREB1	Immunoglobulin iota chain
H7BXU9	FGFR2	Receptor protein-tyrosine kinase (EC 2.7.10.1) (Fragment)
A0A0G2JPB7	BTNL2	BTNL2 (Butyrophilin-like protein 2)
A0A1B0GUA8	KIF13A	Kinesin-like protein KIF13A
J3KQ21	ANKMY1	Ankyrin repeat and MYND domain-containing protein 1
P59190	RAB15	Ras-related protein Rab-15
H7C1N7	SCLY	Selenocysteine lyase (Fragment)
A0A140T9E1	HLA-C	HLA class I histocompatibility antigen, Cw-6 alpha chain (Fragment)
M0R268	SNRPA	U1 small nuclear ribonucleoprotein A (Fragment)
E7EV40	DAZL	Deleted in azoospermia-like (Fragment)
Q9UQ74	PSG8	Pregnancy-specific beta-1-glycoprotein 8 (PS-beta-G-8) (PSBG-8) (Pregnancy-specific glycoprotein 8)
A0A075B6F4	TRBV21OR9-2	T cell receptor beta variable 21/OR9-2 (pseudogene) (Fragment)
Q96A72	MAGOHB	Protein mago nashi homolog 2
P35637	FUS	RNA-binding protein FUS (75 kDa DNA-pairing protein) (Oncogene FUS) (Oncogene TLS) (POMp75) (Translocated in liposarcoma protein)
Q6ZVH7	ESPNL	Espin-like protein
F8VP47	RPH3A	Rabphilin-3A
Q96QE3	ATAD5	ATPase family AAA domain-containing protein 5 (Chromosome fragility-associated gene 1 protein)
P01705	IGLV2-23	Immunoglobulin lambda variable 2-23 (Ig lambda chain V-II region NEI)
C9JQD1	GCK	Phosphotransferase (EC 2.7.1.-)
Q6H3X3	RAET1G	UL-16 binding protein 5 (Retinoic acid early transcript 1G protein)
H0YI52	DDX23	Probable ATP-dependent RNA helicase DDX23 (Fragment)
A0A140T930	HLA-C	HLA class I histocompatibility antigen, Cw-6 alpha chain
O60934	NBN	Nibrin (Cell cycle regulatory protein p95) (Nijmegen breakage syndrome protein 1)
K7EJM5	TARDBP	TAR DNA-binding protein 43 (Fragment)
J3KS83	SKAP1	Src kinase-associated phosphoprotein 1 (Fragment)
B7Z7U4	NTRK3	Tyrosine-protein kinase receptor (EC 2.7.10.1)
Q9NQ88	TIGAR	Fructose-2,6-bisphosphatase TIGAR (EC 3.1.3.46) (TP53-induced glycolysis and apoptosis regulator) (TP53-induced glycolysis regulatory phosphatase)
M0QXF2	ATP1A3	Sodium/potassium-transporting ATPase subunit alpha-3 (Fragment)
Q8NE28	STKLD1	Serine/threonine kinase-like domain-containing protein STKLD1 (Serine/threonine kinase-like domain-containing protein 1) (Sugen kinase 071)
Q7Z6B7	SRGAP1	SLIT-ROBO Rho GTPase-activating protein 1 (srGAP1) (Rho GTPase-activating protein 13)
F8VSC5	SCYL2	SCY1-like protein 2 (Fragment)
Q8TDX7	NEK7	Serine/threonine-protein kinase Nek7 (EC 2.7.11.1) (Never in mitosis A-related kinase 7) (NimA-related protein kinase 7)
Q96RU7	TRIB3	Tribbles homolog 3 (TRB-3) (Neuronal cell death-inducible putative kinase) (SINK) (p65-interacting inhibitor of NF-kappa-B)
F8W9F8	A1CF	APOBEC1 complementation factor
Q14964	RAB39A	Ras-related protein Rab-39A (Rab-39)
Q53QZ3	ARHGAP15	Rho GTPase-activating protein 15 (ArhGAP15) (Rho-type GTPase-activating protein 15)
Q14596	NBR1	Next to BRCA1 gene 1 protein (Cell migration-inducing gene 19 protein) (Membrane component chromosome 17 surface marker 2) (Neighbor of BRCA1 gene 1 protein) (Protein 1A1-3B)
F5H532	NOL8	Nucleolar protein 8
B1APF7	PRKACB	cAMP-dependent protein kinase catalytic subunit beta (Fragment)
A0A087X1I1	ANKRD34A	Ankyrin repeat domain-containing protein 34A (Fragment)
A0A0C4DGF8	EHMT1	Histone-lysine N-methyltransferase EHMT1 (Fragment)
J3KS52	CD300LF	CMRF35-like molecule 1
Q0P5N6	ARL16	ADP-ribosylation factor-like protein 16
Q13595	TRA2A	Transformer-2 protein homolog alpha (TRA-2 alpha) (TRA2-alpha) (Transformer-2 protein homolog A)
A0A0G2JH50	HLA-C	HLA class I histocompatibility antigen, Cw-6 alpha chain
A0A140T9S2	HLA-DQB2	HLA class II histocompatibility antigen, DQ beta 2 chain (Fragment)
Q8N961	ABTB2	Ankyrin repeat and BTB/POZ domain-containing protein 2
H0Y8W3	RGS14	Regulator of G-protein-signaling 14 (Fragment)
A0A087WW76	ARHGAP21	Rho GTPase-activating protein 21
B1ALK7	ARHGEF7	Rho guanine nucleotide exchange factor 7
A6NJS3		Deleted.
Q86VH2	KIF27	Kinesin-like protein KIF27
J3QQL4	KSR1	Kinase suppressor of Ras 1 (Fragment)
Q8N1B3	CCNQ	Cyclin-Q (CDK10-activating cyclin) (Cyclin-M) (Cyclin-related protein FAM58A)
M0R332	MYO9B	Unconventional myosin-IXb (Fragment)
O14807	MRAS	Ras-related protein M-Ras (Ras-related protein R-Ras3)
H7C2Z8	ARHGAP4	Rho GTPase-activating protein 4 (Fragment)
B1AKF7	ENOX2	Ecto-NOX disulfide-thiol exchanger 2 (Fragment)
A0A0J9YXJ0	CELF2	CUGBP Elav-like family member 2
E9PL56	RAB29	Ras-related protein Rab-7L1
E9PRA5	ATP1A4	Sodium/potassium-transporting ATPase subunit alpha-4
F8WCV8	ARHGAP8	Rho GTPase-activating protein 8
H0YC04	ATP6V1B2	V-type proton ATPase subunit B, brain isoform (Fragment)
Q15759	MAPK11	Mitogen-activated protein kinase 11 (MAP kinase 11) (MAPK 11) (EC 2.7.11.24) (Mitogen-activated protein kinase p38 beta) (MAP kinase p38 beta) (p38b) (Stress-activated protein kinase 2b) (SAPK2b) (p38-2)
I3L0H8	DDX19A	ATP-dependent RNA helicase DDX19A
A0A0J9YXT0	ARL6	ADP-ribosylation factor-like protein 6 (Fragment)
A0A075B6K5	IGLV3-9	Immunoglobulin lambda variable 3-9
P30530	AXL	Tyrosine-protein kinase receptor UFO (EC 2.7.10.1) (AXL oncogene)
A0A0A0MRW7	APTX	Aprataxin
D6RBZ0	HNRNPAB	Heterogeneous nuclear ribonucleoprotein A/B
A0A140T9H3	HLA-B	HLA class I histocompatibility antigen, B-46 alpha chain (Fragment)
A0A075B788	PTPRC	Receptor-type tyrosine-protein phosphatase C
G3V0G5	ANKMY2	Ankyrin repeat and MYND domain containing 2, isoform CRA_c (Ankyrin repeat and MYND domain-containing protein 2)
E9PRA8	CRYAB	Alpha-crystallin B chain
K7EP90	RBM42	RNA-binding protein 42
Q16512	PKN1	Serine/threonine-protein kinase N1 (EC 2.7.11.13) (Protease-activated kinase 1) (PAK-1) (Protein kinase C-like 1) (Protein kinase C-like PKN) (Protein kinase PKN-alpha) (Protein-kinase C-related kinase 1) (Serine-threonine protein kinase N)
Q16832	DDR2	Discoidin domain-containing receptor 2 (Discoidin domain receptor 2) (EC 2.7.10.1) (CD167 antigen-like family member B) (Discoidin domain-containing receptor tyrosine kinase 2) (Neurotrophic tyrosine kinase, receptor-related 3) (Receptor protein-tyrosine kinase TKT) (Tyrosine-protein kinase TYRO10) (CD antigen CD167b)
Q9UKX7	NUP50	Nuclear pore complex protein Nup50 (50 kDa nucleoporin) (Nuclear pore-associated protein 60 kDa-like) (Nucleoporin Nup50)
Q9NYL2	MAP3K20	Mitogen-activated protein kinase kinase kinase 20 (EC 2.7.11.25) (Human cervical cancer suppressor gene 4 protein) (HCCS-4) (Leucine zipper- and sterile alpha motif-containing kinase) (MLK-like mitogen-activated protein triple kinase) (Mitogen-activated protein kinase kinase kinase MLT) (Mixed lineage kinase-related kinase) (MLK-related kinase) (MRK) (Sterile alpha motif- and leucine zipper-conta…
A0A075B6J6	IGLV3-22	Immunoglobulin lambda variable 3-22
C9JBG0	RAB34	Ras-related protein Rab-34, isoform NARR (Fragment)
Q9HBY8	SGK2	Serine/threonine-protein kinase Sgk2 (EC 2.7.11.1) (Serum/glucocorticoid-regulated kinase 2)
Q15717	ELAVL1	ELAV-like protein 1 (Hu-antigen R) (HuR)
H7C172	PRKD3	Serine/threonine-protein kinase D3 (Fragment)
A0A0D9SFB9	MELK	Maternal embryonic leucine zipper kinase
J3QTB0	TRPC3	Short transient receptor potential channel 3
K7ENJ4	ATP5F1A	ATP synthase subunit alpha, mitochondrial (Fragment)
O60563	CCNT1	Cyclin-T1 (CycT1) (Cyclin-T)
E5RJY0	PIK3R1	Phosphatidylinositol 3-kinase regulatory subunit alpha (Fragment)
M0QXZ8	SYDE1	Rho GTPase-activating protein SYDE1 (Synapse defective 1, Rho GTPase, homolog 1 (C. elegans), isoform CRA_a)
Q9Y2H9	MAST1	Microtubule-associated serine/threonine-protein kinase 1 (EC 2.7.11.1) (Syntrophin-associated serine/threonine-protein kinase)
G3V4C1	HNRNPC	Heterogeneous nuclear ribonucleoproteins C1/C2
R4GN33	MAPKAPK5	MAP kinase-activated protein kinase 5 (Fragment)
F8WAJ0	DDX31	RNA helicase (EC 3.6.4.13)
Q9NQZ3	DAZ1	Deleted in azoospermia protein 1
G3V5Y6	PRKCH	Protein kinase C eta type (Fragment)
F5H0R6	PLEKHB1	Pleckstrin homology domain-containing family B member 1 (Fragment)
Q96RU8	TRIB1	Tribbles homolog 1 (TRB-1) (G-protein-coupled receptor-induced gene 2 protein) (GIG-2) (SKIP1)
A0A1B0GVW8	UNC13B	Protein unc-13 homolog B
H0Y8A4	RYK	Tyrosine-protein kinase RYK (Fragment)
Q8TD26	CHD6	Chromodomain-helicase-DNA-binding protein 6 (CHD-6) (EC 3.6.4.12) (ATP-dependent helicase CHD6) (Radiation-induced gene B protein)
F5H5P4	VAV1	Proto-oncogene vav
P52272	HNRNPM	Heterogeneous nuclear ribonucleoprotein M (hnRNP M)
A0JD32	TRAV38-2DV8	T cell receptor alpha variable 38-2/delta variable 8
F8W646	HNRNPA1	Heterogeneous nuclear ribonucleoprotein A1 (Fragment)
A0A087WXP8	AXIN2	Axin-2
A0A140T941	HLA-A	HLA class I histocompatibility antigen, A-3 alpha chain
H0YAM8	MIB2	E3 ubiquitin-protein ligase MIB2 (Fragment)
K7ENT1	ADAP2	Arf-GAP with dual PH domain-containing protein 2 (Fragment)
E3W990	SQSTM1	Sequestosome-1 (Fragment)
H3BRB1		Uncharacterized protein
F8WC57	TF	Serotransferrin
Q56UN5	MAP3K19	Mitogen-activated protein kinase kinase kinase 19 (EC 2.7.11.1) (Regulated in COPD, protein kinase) (SPS1/STE20-related protein kinase YSK4)
Q8NBU5	ATAD1	ATPase family AAA domain-containing protein 1 (EC 3.6.1.3) (Thorase)
P11274	BCR	Breakpoint cluster region protein (EC 2.7.11.1) (Renal carcinoma antigen NY-REN-26)
Q6VAB6	KSR2	Kinase suppressor of Ras 2 (hKSR2) (EC 2.7.11.1)
E9PE37	RAB2B	Ras-related protein Rab-2B
A0A0B4J1V6	IGHV3-73	Immunoglobulin heavy variable 3-73
Q9P286	PAK5	Serine/threonine-protein kinase PAK 5 (EC 2.7.11.1) (p21-activated kinase 5) (PAK-5) (p21-activated kinase 7) (PAK-7)
Q96T37	RBM15	Putative RNA-binding protein 15 (One-twenty two protein 1) (RNA-binding motif protein 15)
Q5T5M9	CCNJ	Cyclin-J
P0DJD1	RGPD2	RANBP2-like and GRIP domain-containing protein 2 (Ran-binding protein 2-like 2) (RanBP2-like 2) (RanBP2L2)
J3QL17	DDX25	ATP-dependent RNA helicase DDX25 (Fragment)
D6RB75	TEC	Tyrosine-protein kinase Tec
J3KNM6	AGAP2	Arf-GAP with GTPase, ANK repeat and PH domain-containing protein 2 (Fragment)
P25311	AZGP1	Zinc-alpha-2-glycoprotein (Zn-alpha-2-GP) (Zn-alpha-2-glycoprotein)
A6PVI3	NCBP2L	Nuclear cap-binding protein subunit 2-like
D6R9D6	RBM47	RNA-binding protein 47
B4DSU6	HNRNPC	Heterogeneous nuclear ribonucleoproteins C1/C2 (cDNA FLJ52975, highly similar to Heterogeneous nuclear ribonucleoproteins C)
P25098	GRK2	Beta-adrenergic receptor kinase 1 (Beta-ARK-1) (EC 2.7.11.15) (G-protein coupled receptor kinase 2)
B1ALB6	NCF2	Neutrophil cytosol factor 2 (Fragment)
O60229	KALRN	Kalirin (EC 2.7.11.1) (Huntingtin-associated protein-interacting protein) (Protein Duo) (Serine/threonine-protein kinase with Dbl- and pleckstrin homology domain)
K7EIW3	MAP2K6	Dual-specificity mitogen-activated protein kinase kinase 6 (Fragment)
P51692	STAT5B	Signal transducer and activator of transcription 5B
Q96QC4	MICA	MHC class I polypeptide-related sequence A (MHC class I polypeptide-related sequence A, isoform CRA_c) (MICA) (Stress inducible class I homolog) (cDNA FLJ60820, highly similar to Homo sapiens MHC class I polypeptide-related sequence A (MICA), mRNA)
G3V4Y8	ATL1	Atlastin-1 (Fragment)
Q9H792	PEAK1	Pseudopodium-enriched atypical kinase 1 (EC 2.7.10.2) (Sugen kinase 269) (Tyrosine-protein kinase SgK269)
Q9UJV9	DDX41	Probable ATP-dependent RNA helicase DDX41 (EC 3.6.4.13) (DEAD box protein 41) (DEAD box protein abstrakt homolog)
H0Y5P2	HLA-DPB1	HLA class II histocompatibility antigen, DP beta 1 chain (Fragment)
Q86VV4	RANBP3L	Ran-binding protein 3-like
Q9NRH3	TUBG2	Tubulin gamma-2 chain (Gamma-2-tubulin)
Q92620	DHX38	Pre-mRNA-splicing factor ATP-dependent RNA helicase PRP16 (EC 3.6.4.13) (ATP-dependent RNA helicase DHX38) (DEAH box protein 38)
G3V5T7	KRAS	GTPase KRas
C9IZQ6	KALRN	HCG2022551, isoform CRA_j (Kalirin)
M0R1W6	HNRNPL	Heterogeneous nuclear ribonucleoprotein L (Fragment)
Q9Y2R2	PTPN22	Tyrosine-protein phosphatase non-receptor type 22 (EC 3.1.3.48) (Hematopoietic cell protein-tyrosine phosphatase 70Z-PEP) (Lymphoid phosphatase) (LyP) (PEST-domain phosphatase) (PEP)
Q9Y286	SIGLEC7	Sialic acid-binding Ig-like lectin 7 (Siglec-7) (Adhesion inhibitory receptor molecule 1) (AIRM-1) (CDw328) (D-siglec) (QA79 membrane protein) (p75) (CD antigen CD328)
A0A087WV00	DGKI	Diacylglycerol kinase (DAG kinase) (EC 2.7.1.107)
P01703	IGLV1-40	Immunoglobulin lambda variable 1-40 (Ig lambda chain V-I region NEWM)
Q9BZM4	ULBP3	UL16-binding protein 3 (ALCAN-gamma) (NKG2D ligand 3) (N2DL-3) (NKG2DL3) (Retinoic acid early transcript 1N)
C9JVZ3	ULK4	Serine/threonine-protein kinase ULK4
Q8TDD1	DDX54	ATP-dependent RNA helicase DDX54 (EC 3.6.4.13) (ATP-dependent RNA helicase DP97) (DEAD box RNA helicase 97 kDa) (DEAD box protein 54)
H3BN82		Deleted.
Q5JQF8	PABPC1L2A; PABPC1L2B	Polyadenylate-binding protein 1-like 2 (RNA-binding motif protein 32) (RNA-binding protein 32)
H0YLV2	CPNE6	Copine-6 (Fragment)
F5GYR1	RERG	Ras-related and estrogen-regulated growth inhibitor (Fragment)
Q9UHX1	PUF60	Poly(U)-binding-splicing factor PUF60 (60 kDa poly(U)-binding-splicing factor) (FUSE-binding protein-interacting repressor) (FBP-interacting repressor) (Ro-binding protein 1) (RoBP1) (Siah-binding protein 1) (Siah-BP1)
P10319	HLA-B	HLA class I histocompatibility antigen, B-58 alpha chain (Bw-58) (MHC class I antigen B*58)
E5RIU2	ARFGAP1	ADP-ribosylation factor GTPase-activating protein 1 (Fragment)
A0A0J9YWV2	TRBV4-1	T cell receptor beta variable 4-1 (Fragment)
H0YJW7	SLIRP	SRA stem-loop-interacting RNA-binding protein, mitochondrial (Fragment)
A6QL63	BTBD11	Ankyrin repeat and BTB/POZ domain-containing protein BTBD11 (BTB/POZ domain-containing protein 11)
F8W6I9	ANKRD42	Ankyrin repeat domain-containing protein 42
F8VYN9	ARL1	ADP-ribosylation factor-like protein 1
Q2M3V2	SOWAHA	Ankyrin repeat domain-containing protein SOWAHA (Ankyrin repeat domain-containing protein 43) (Protein sosondowah homolog A)
W5RWE6	PXK	PX domain-containing protein kinase-like protein (PXK)
P42679	MATK	Megakaryocyte-associated tyrosine-protein kinase (EC 2.7.10.2) (CSK homologous kinase) (CHK) (Hematopoietic consensus tyrosine-lacking kinase) (Protein kinase HYL) (Tyrosine-protein kinase CTK)
A0A140T9B8	MICA	MHC class I polypeptide-related sequence A (Fragment)
P30486	HLA-B	HLA class I histocompatibility antigen, B-48 alpha chain (Bw-48) (MHC class I antigen B*48)
Q08708	CD300C	CMRF35-like molecule 6 (CLM-6) (CD300 antigen-like family member C) (CMRF35-A1) (CMRF-35) (Immunoglobulin superfamily member 16) (IgSF16) (CD antigen CD300c)
D6R9K7	RBM4	RNA-binding protein 4
E9PBY2	DAZ2	Deleted in azoospermia protein 2
Q9ULL4	PLXNB3	Plexin-B3
H0Y8G5	HNRNPD	Heterogeneous nuclear ribonucleoprotein D0 (Fragment)
F8W9L0	HIF1A	Hypoxia-inducible factor 1-alpha
Q8IY21	DDX60	Probable ATP-dependent RNA helicase DDX60 (EC 3.6.4.13) (DEAD box protein 60)
Q13283	G3BP1	Ras GTPase-activating protein-binding protein 1 (G3BP-1) (EC 3.6.4.12) (EC 3.6.4.13) (ATP-dependent DNA helicase VIII) (hDH VIII) (GAP SH3 domain-binding protein 1)
A0A0C4DH43	IGHV2-70D	Immunoglobulin heavy variable 2-70D
P78330	PSPH	Phosphoserine phosphatase (PSP) (PSPase) (EC 3.1.3.3) (L-3-phosphoserine phosphatase) (O-phosphoserine phosphohydrolase)
H0Y8W5	ARHGAP10	Rho GTPase-activating protein 10 (Fragment)
H0Y8U9	HK3	Phosphotransferase (EC 2.7.1.-) (Fragment)
Q5T013	HYI	Putative hydroxypyruvate isomerase (EC 5.3.1.22) (Endothelial cell apoptosis protein E-CE1)
E9PQ87	RRAS2	Ras-related protein R-Ras2 (Fragment)
Q8IV13	CCNJL	Cyclin-J-like protein
G3V2Q3	CCNK	Cyclin-K (Fragment)
V9GYA3	RECQL4	ATP-dependent DNA helicase Q4 (Fragment)
A0A140T9Q1	HLA-DPB1	HLA class II histocompatibility antigen, DP beta 1 chain (Fragment)
K7EIJ4	RANBP3	Ran-binding protein 3 (Fragment)
D6RJB4	DGKQ	Diacylglycerol kinase theta (Fragment)
D6RHK2	CENPE	Centromere-associated protein E (Fragment)
A0A0A0MRY0	TBC1D22A	TBC1 domain family member 22A
A0A0G2JQ41	ABR	Active breakpoint cluster region-related protein (Fragment)
P55273	CDKN2D	Cyclin-dependent kinase 4 inhibitor D (p19-INK4d)
O00212	RHOD	Rho-related GTP-binding protein RhoD (Rho-related protein HP1) (RhoHP1)
F8WFC4	MPZL1	Myelin protein zero-like protein 1
H7C5P8	NME9	Thioredoxin domain-containing protein 6 (Fragment)
G3V1V1	ZCRB1	Zinc finger CCHC-type and RNA binding motif 1, isoform CRA_b (Zinc finger CCHC-type and RNA-binding motif-containing protein 1)
Q8N8A6	DDX51	ATP-dependent RNA helicase DDX51 (EC 3.6.4.13) (DEAD box protein 51)
K7EQ97	CELF4	CUGBP Elav-like family member 4 (Fragment)
E7EQB2	LTF	Lactotransferrin (Fragment)
C9JQ94	CHN2	Beta-chimaerin (Fragment)
A6NM43	CCT8L1P	Putative T-complex protein 1 subunit theta-like 1
H0Y3K3	RBM33	RNA-binding protein 33 (Fragment)
A0A140T913	HLA-A	HLA class I histocompatibility antigen, A-3 alpha chain
O95267	RASGRP1	RAS guanyl-releasing protein 1 (Calcium and DAG-regulated guanine nucleotide exchange factor II) (CalDAG-GEFII) (Ras guanyl-releasing protein)
D6REZ8	PRKCZ	Protein kinase C zeta type (Fragment)
Q96AP7	ESAM	Endothelial cell-selective adhesion molecule
Q8WUA2	PPIL4	Peptidyl-prolyl cis-trans isomerase-like 4 (PPIase) (EC 5.2.1.8) (Cyclophilin-like protein PPIL4) (Rotamase PPIL4)
E9PIR1	ARHGAP27	Rho GTPase-activating protein 27
A2BF26	HLA-C	HLA class I histocompatibility antigen, Cw-6 alpha chain
M0R002	ANKLE1	Ankyrin repeat and LEM domain-containing protein 1 (Fragment)
A0A0G2JH66	HLA-F	HLA class I histocompatibility antigen, alpha chain F
A0A075B6Q3	BCORL1	BCL-6 corepressor-like protein 1 (Fragment)
Q5JSD8	ARHGAP21	Rho GTPase-activating protein 21 (Fragment)
Q96E92	PRKAA1	5'-AMP-activated protein kinase catalytic subunit alpha-1 (PRKAA1 protein) (Protein kinase, AMP-activated, alpha 1 catalytic subunit, isoform CRA_b)
A0A0A0MQZ2	SYNGAP1	Ras/Rap GTPase-activating protein SynGAP (Fragment)
H3BQK0	DDX19B	ATP-dependent RNA helicase DDX19B (HCG1998531, isoform CRA_g)
H0YLT8	CD276	CD276 antigen (Fragment)
F8WDP4	MAPK11	Mitogen-activated protein kinase 11
B0UXQ0	HLA-A	HLA class I histocompatibility antigen, A-3 alpha chain (MHC class I antigen)
C9J338	TNIK	TRAF2 and NCK-interacting protein kinase (Fragment)
Q5T853	MAP3K8	Mitogen-activated protein kinase kinase kinase 8 (Fragment)
F8VW89	ARHGAP9	Rho GTPase-activating protein 9 (Fragment)
H0Y8R1	GRSF1	G-rich sequence factor 1 (Fragment)
I3L0U9	TBC1D16	TBC1 domain family member 16 (Fragment)
H0Y7Z9	PTPRF	Receptor-type tyrosine-protein phosphatase F (Fragment)
H0YE36	ASAP3	Arf-GAP with SH3 domain, ANK repeat and PH domain-containing protein 3 (Fragment)
P15056	BRAF	Serine/threonine-protein kinase B-raf (EC 2.7.11.1) (Proto-oncogene B-Raf) (p94) (v-Raf murine sarcoma viral oncogene homolog B1)
H0Y732	HLA-DMA	HLA class II histocompatibility antigen, DM alpha chain (Fragment)
H3BNS4	NUBP2	Cytosolic Fe-S cluster assembly factor NUBP2 (Fragment)
P51812	RPS6KA3	Ribosomal protein S6 kinase alpha-3 (S6K-alpha-3) (EC 2.7.11.1) (90 kDa ribosomal protein S6 kinase 3) (p90-RSK 3) (p90RSK3) (Insulin-stimulated protein kinase 1) (ISPK-1) (MAP kinase-activated protein kinase 1b) (MAPK-activated protein kinase 1b) (MAPKAP kinase 1b) (MAPKAPK-1b) (Ribosomal S6 kinase 2) (RSK-2) (pp90RSK2)
P30466	HLA-B	HLA class I histocompatibility antigen, B-18 alpha chain (MHC class I antigen B*18)
P54756	EPHA5	Ephrin type-A receptor 5 (EC 2.7.10.1) (Brain-specific kinase) (EPH homology kinase 1) (EHK-1) (EPH-like kinase 7) (EK7) (hEK7)
Q92738	USP6NL	USP6 N-terminal-like protein (Related to the N-terminus of tre) (RN-tre)
H7BYC3	BTN2A1	Butyrophilin subfamily 2 member A1
A0A0A6YYC5	TRAV14DV4	T cell receptor alpha variable 14/delta variable 4
A0A140T955	HLA-A	HLA class I histocompatibility antigen, A-3 alpha chain
F8VWB3	ARFGAP1	ADP-ribosylation factor GTPase-activating protein 1 (Fragment)
Q5T7I8	SHC3	SHC-transforming protein 3
B7Z645	SYNCRIP	Heterogeneous nuclear ribonucleoprotein Q (Synaptotagmin binding, cytoplasmic RNA interacting protein, isoform CRA_b) (cDNA FLJ50849, highly similar to Heterogeneous nuclear ribonucleoprotein Q)
A0A0G2JK11	MICA	MHC class I polypeptide-related sequence A
Q95365	HLA-B	HLA class I histocompatibility antigen, B-38 alpha chain (Bw-4) (MHC class I antigen B*38)
H3BRA8	NME3	Nucleoside diphosphate kinase 3 (Fragment)
B2R5W2	HNRNPC	Heterogeneous nuclear ribonucleoproteins C1/C2 (cDNA, FLJ92657, highly similar to Homo sapiens heterogeneous nuclear ribonucleoprotein C (C1/C2) (HNRPC), transcript variant 2, mRNA)
C9JPE8	RALA	Ras-related protein Ral-A (Fragment)
E7ESL9	AGAP3	Arf-GAP with GTPase, ANK repeat and PH domain-containing protein 3
F8W6L0	RASA4B	Ras GTPase-activating protein 4B
P01599	IGKV1-17	Immunoglobulin kappa variable 1-17 (Ig kappa chain V-I region Gal) (Ig kappa chain V-I region WEA)
H0YD14	MYOF	Myoferlin (Fragment)
B3VCG4	CHN2	Beta chimaerin isoform B2-CHNdel ex6p-12pB
Q9BXX3	ANKRD30A	Ankyrin repeat domain-containing protein 30A (Serologically defined breast cancer antigen NY-BR-1)
E7ETN8	GBP5	Guanylate-binding protein 5 (Fragment)
Q96JZ2	HSH2D	Hematopoietic SH2 domain-containing protein (Hematopoietic SH2 protein) (Adaptor in lymphocytes of unknown function X)
B4DM24	CAMKV	CaM kinase-like vesicle-associated protein (cDNA FLJ54113, highly similar to Homo sapiens CaM kinase-like vesicle-associated (CAMKV), mRNA)
J3KR84	PLK4	Serine/threonine-protein kinase PLK4
Q9BZF1	OSBPL8	Oxysterol-binding protein-related protein 8 (ORP-8) (OSBP-related protein 8)
P23588	EIF4B	Eukaryotic translation initiation factor 4B (eIF-4B)
K7ERY4	MATK	Megakaryocyte-associated tyrosine-protein kinase (Fragment)
S4R2X6	SRSF4	Serine/arginine-rich-splicing factor 4
A0A0D9SFW8	HLA-F	HLA class I histocompatibility antigen, alpha chain F (Fragment)
J3QL52	EIF4A1	Eukaryotic initiation factor 4A-I (Fragment)
Q96SF2	CCT8L2	T-complex protein 1 subunit theta-like 2
A0A087WT09	PSG7	Putative pregnancy-specific beta-1-glycoprotein 7
J3QRN5	DDX5	Probable ATP-dependent RNA helicase DDX5 (Fragment)
O43251	RBFOX2	RNA binding protein fox-1 homolog 2 (Fox-1 homolog B) (Hexaribonucleotide-binding protein 2) (RNA-binding motif protein 9) (RNA-binding protein 9) (Repressor of tamoxifen transcriptional activity)
A0A0B4J237	TRAV8-2	T cell receptor alpha variable 8-2
D6R9U4	ANK2	Ankyrin-2 (Fragment)
E9PSH0	CELF1	CUGBP Elav-like family member 1 (Fragment)
Q8IWW6	ARHGAP12	Rho GTPase-activating protein 12 (Rho-type GTPase-activating protein 12)
H0Y307	KIF13A	Kinesin-like protein KIF13A (Fragment)
Q01814	ATP2B2	Plasma membrane calcium-transporting ATPase 2 (PMCA2) (EC 3.6.3.8) (Plasma membrane calcium ATPase isoform 2) (Plasma membrane calcium pump isoform 2)
Q5T7B8	KIF24	Kinesin-like protein KIF24
H7C270	CTDSP1	Carboxy-terminal domain RNA polymerase II polypeptide A small phosphatase 1 (Fragment)
Q6ZN66	GBP6	Guanylate-binding protein 6 (GTP-binding protein 6) (GBP-6) (Guanine nucleotide-binding protein 6)
Q9Y2G4	ANKRD6	Ankyrin repeat domain-containing protein 6 (Diversin)
F8VR27	RBFOX1	RNA-binding protein fox-1 homolog 1 (Fragment)
P18463	HLA-B	HLA class I histocompatibility antigen, B-37 alpha chain (MHC class I antigen B*37)
J3KP92	HIPK1	Homeodomain-interacting protein kinase 1
E7EUY6	ARHGEF7	Rho guanine nucleotide exchange factor 7 (Fragment)
E7ERY9	ATP2B1	Calcium-transporting ATPase (EC 3.6.3.8)
Q09013	DMPK	Myotonin-protein kinase (MT-PK) (EC 2.7.11.1) (DM-kinase) (DMK) (DM1 protein kinase) (DMPK) (Myotonic dystrophy protein kinase)
H0YB18	HYI	Putative hydroxypyruvate isomerase (Fragment)
F5GXB1	RHOF	Rho-related GTP-binding protein RhoF (Fragment)
O94806	PRKD3	Serine/threonine-protein kinase D3 (EC 2.7.11.13) (Protein kinase C nu type) (Protein kinase EPK2) (nPKC-nu)
Q5Y7H0	HLA-DQA1	HLA class II histocompatibility antigen, DQ alpha 1 chain (MHC class II antigen)
H7C353	CTDSPL	CTD small phosphatase-like protein (Fragment)
J3KP20	NTRK1	Tyrosine-protein kinase receptor (EC 2.7.10.1)
O75582	RPS6KA5	Ribosomal protein S6 kinase alpha-5 (S6K-alpha-5) (EC 2.7.11.1) (90 kDa ribosomal protein S6 kinase 5) (Nuclear mitogen- and stress-activated protein kinase 1) (RSK-like protein kinase) (RSKL)
P30501	HLA-C	HLA class I histocompatibility antigen, Cw-2 alpha chain (MHC class I antigen Cw*2)
E9PC55	PSG5	Pregnancy-specific beta-1-glycoprotein 5
F5H6T5	ARF3	ADP-ribosylation factor 3 (Fragment)
C9JNR4	RHOA	Transforming protein RhoA (Fragment)
A5PKW4	PSD	PH and SEC7 domain-containing protein 1 (Exchange factor for ADP-ribosylation factor guanine nucleotide factor 6) (Exchange factor for ARF6) (Exchange factor for ARF6 A) (Pleckstrin homology and SEC7 domain-containing protein 1)
A0A087X260	TARDBP	TAR DNA-binding protein 43
H3BS85	DOK4	Docking protein 4 (Fragment)
Q92698	RAD54L	DNA repair and recombination protein RAD54-like (EC 3.6.4.-) (RAD54 homolog) (hHR54) (hRAD54)
H0YBD7	HNRNPH1	Heterogeneous nuclear ribonucleoprotein H (Fragment)
J3QLH6	PSMC5	26S proteasome regulatory subunit 8 (Fragment)
E7EU96	CSNK2A1	Casein kinase II subunit alpha
A0A087WX74	CLK4	Dual-specificity protein kinase CLK4
E5RJ57	MAPK9	Mitogen-activated protein kinase 9 (Fragment)
D6RCP5	ARHGAP24	Rho GTPase-activating protein 24 (Fragment)
A0A0C4DFV1	RIMS1	Regulating synaptic membrane exocytosis protein 1 (Fragment)
F8VZI0	PFKM	ATP-dependent 6-phosphofructokinase, muscle type (Fragment)
A0A0C4DH34	IGHV4-28	Immunoglobulin heavy variable 4-28
A0A140T9J1	HLA-DQB2	HLA class II histocompatibility antigen, DQ beta 2 chain (Fragment)
E9PG46	AAK1	AP2-associated protein kinase 1
K7EJZ9	MAST1	Microtubule-associated serine/threonine-protein kinase 1 (Fragment)
O75526	RBMXL2	RNA-binding motif protein, X-linked-like-2 (Testis-specific heterogeneous nuclear ribonucleoprotein G-T) (hnRNP G-T)
P54646	PRKAA2	5'-AMP-activated protein kinase catalytic subunit alpha-2 (AMPK subunit alpha-2) (EC 2.7.11.1) (Acetyl-CoA carboxylase kinase) (ACACA kinase) (EC 2.7.11.27) (Hydroxymethylglutaryl-CoA reductase kinase) (HMGCR kinase) (EC 2.7.11.31)
A0A140T9Q8	HLA-DMB	HLA class II histocompatibility antigen, DM beta chain (Fragment)
B4DEW2	MAPK4	Mitogen-activated protein kinase 4 (cDNA FLJ50121, highly similar to Homo sapiens mitogen-activated protein kinase 4 (MAPK4), mRNA)
Q5VUJ5	AGAP7P	Putative Arf-GAP with GTPase, ANK repeat and PH domain-containing protein 7 (AGAP-7) (Arf-GAP with GTPase, ANK repeat and PH domain-containing protein 7 pseudogene) (Centaurin-gamma-like family member 4)
A0A140T911	HLA-DQB1	HLA class II histocompatibility antigen, DQ beta 1 chain
A0A140T9X3	DDX39B	Spliceosome RNA helicase DDX39B (Fragment)
B7Z3B5	RPS6KA2	Non-specific serine/threonine protein kinase (EC 2.7.11.1)
A0A1B0GUS7	UNC13B	Protein unc-13 homolog B
M0R1I1	TUBB4A	Tubulin beta chain (Fragment)
H0YJ50	VRK1	Serine/threonine-protein kinase VRK1 (Fragment)
D6RA42	MCTP1	Multiple C2 and transmembrane domain-containing protein 1 (Fragment)
C9JGG1	PILRA	Paired immunoglobulin-like type 2 receptor alpha (Fragment)
Q5JY90	BTK	Tyrosine-protein kinase (EC 2.7.10.2)
O75791	GRAP2	GRB2-related adapter protein 2 (Adapter protein GRID) (GRB-2-like protein) (GRB2L) (GRBLG) (GRBX) (Grf40 adapter protein) (Grf-40) (Growth factor receptor-binding protein) (Hematopoietic cell-associated adapter protein GrpL) (P38) (Protein GADS) (SH3-SH2-SH3 adapter Mona)
H0Y8H0	DDX60L	Probable ATP-dependent RNA helicase DDX60-like (Fragment)
Q5VX20	PFKFB3	6-phosphofructo-2-kinase/fructose-2,6-bisphosphatase 3
P51451	BLK	Tyrosine-protein kinase Blk (EC 2.7.10.2) (B lymphocyte kinase) (p55-Blk)
A0A0J9YWU9		Uncharacterized protein (Fragment)
J3KNB8	MAP3K4	Mitogen-activated protein kinase kinase kinase 4
K7ER40	CIRBP	Cold-inducible RNA-binding protein (Fragment)
A0A0G2JI85	DDR1	Epithelial discoidin domain-containing receptor 1 (Fragment)
A0A0U1RR71	PLEKHG3	Pleckstrin homology domain-containing family G member 3 (Fragment)
H7C1M9	MYO3B	Myosin-IIIb (Fragment)
O95476	CTDNEP1	CTD nuclear envelope phosphatase 1 (EC 3.1.3.16) (Serine/threonine-protein phosphatase dullard)
A0A087X0V9	HSH2D	Hematopoietic SH2 domain-containing protein
Q3ZCM7	TUBB8	Tubulin beta-8 chain (Tubulin beta 8 class VIII)
C9J057	ASNS	Asparagine synthetase [glutamine-hydrolyzing] (Fragment)
G3V546	RBM23	Probable RNA-binding protein 23 (Fragment)
P46531	NOTCH1	Neurogenic locus notch homolog protein 1 (Notch 1) (hN1) (Translocation-associated notch protein TAN-1) [Cleaved into: Notch 1 extracellular truncation (NEXT); Notch 1 intracellular domain (NICD)]
A0A0D9SFE4	DNM1	Dynamin-1
F8VV64	TNS2	Tensin-2
Q9UHL0	DDX25	ATP-dependent RNA helicase DDX25 (EC 3.6.4.13) (DEAD box protein 25) (Gonadotropin-regulated testicular RNA helicase)
P21281	ATP6V1B2	V-type proton ATPase subunit B, brain isoform (V-ATPase subunit B 2) (Endomembrane proton pump 58 kDa subunit) (HO57) (Vacuolar proton pump subunit B 2)
Q9H3E2	SNX25	Sorting nexin-25
O95786	DDX58	Probable ATP-dependent RNA helicase DDX58 (EC 3.6.4.13) (DEAD box protein 58) (RIG-I-like receptor 1) (RLR-1) (Retinoic acid-inducible gene 1 protein) (RIG-1) (Retinoic acid-inducible gene I protein) (RIG-I)
B7Z7N5	RGS6	Regulator of G-protein-signaling 6 (cDNA FLJ53896, highly similar to Regulator of G-protein signaling 6)
H0Y8M4	CCND3	G1/S-specific cyclin-D3 (Fragment)
P01780	IGHV3-7	Immunoglobulin heavy variable 3-7 (Ig heavy chain V-III region GAL) (Ig heavy chain V-III region GAR) (Ig heavy chain V-III region JON)
Q9ULG1	INO80	DNA helicase INO80 (hINO80) (EC 3.6.4.12) (INO80 complex subunit A) (Putative DNA helicase INO80 complex homolog 1)
Q9P1W8	SIRPG	Signal-regulatory protein gamma (SIRP-gamma) (CD172 antigen-like family member B) (Signal-regulatory protein beta-2) (SIRP-b2) (SIRP-beta-2) (CD antigen CD172g)
F6VRR5	POLDIP3	Polymerase delta-interacting protein 3
Q9NY57	STK32B	Serine/threonine-protein kinase 32B (EC 2.7.11.1) (Yet another novel kinase 2)
Q96S21	RAB40C	Ras-related protein Rab-40C (Rar-like protein) (Ras-like protein family member 8C) (SOCS box-containing protein RAR3)
A0A0G2JJZ9	DDX39B	Spliceosome RNA helicase DDX39B (Fragment)
A0A087X1G2	TBC1D3K	TBC1 domain family member 3K
A0A140T9Q5	HLA-DMB	HLA class II histocompatibility antigen, DM beta chain (Fragment)
O00459	PIK3R2	Phosphatidylinositol 3-kinase regulatory subunit beta (PI3-kinase regulatory subunit beta) (PI3K regulatory subunit beta) (PtdIns-3-kinase regulatory subunit beta) (Phosphatidylinositol 3-kinase 85 kDa regulatory subunit beta) (PI3-kinase subunit p85-beta) (PtdIns-3-kinase regulatory subunit p85-beta)
A0A0U1RRC9	UBASH3A	Ubiquitin-associated and SH3 domain-containing protein A
A0A075B7F0	IGHV3OR16-10	Immunoglobulin heavy variable 3/OR16-10 (non-functional) (Fragment)
Q8TDG4	HELQ	Helicase POLQ-like (EC 3.6.4.12) (Mus308-like helicase) (POLQ-like helicase)
A0A140T8W8	HLA-A	HLA class I histocompatibility antigen, A-3 alpha chain
P08069	IGF1R	Insulin-like growth factor 1 receptor (EC 2.7.10.1) (Insulin-like growth factor I receptor) (IGF-I receptor) (CD antigen CD221) [Cleaved into: Insulin-like growth factor 1 receptor alpha chain; Insulin-like growth factor 1 receptor beta chain]
Q9NQT8	KIF13B	Kinesin-like protein KIF13B (Kinesin-like protein GAKIN)
A0A0U1RQL3	KIF1B	Kinesin-like protein KIF1B (Fragment)
E9PD56	PXK	PX domain-containing protein kinase-like protein
H7C459	MAP3K13	Mitogen-activated protein kinase kinase kinase 13 (Fragment)
B1AJR9	PTPRT	Receptor-type tyrosine-protein phosphatase T
J3QR64	EIF4A1	Eukaryotic initiation factor 4A-I (Fragment)
C9JQK2	ANKRD53	Ankyrin repeat domain-containing protein 53
A0A0J9YX66	CELF2	CUGBP Elav-like family member 2
A0A0H2UH41	POTEM	Putative POTE ankyrin domain family member M
P51841	GUCY2F	Retinal guanylyl cyclase 2 (RETGC-2) (EC 4.6.1.2) (Guanylate cyclase 2F, retinal) (Guanylate cyclase F) (GC-F) (Rod outer segment membrane guanylate cyclase 2) (ROS-GC2)
P42285	MTREX	Exosome RNA helicase MTR4 (EC 3.6.4.13) (ATP-dependent RNA helicase DOB1) (ATP-dependent RNA helicase SKIV2L2) (Superkiller viralicidic activity 2-like 2) (TRAMP-like complex helicase)
E7EWR4	CSTF2	Cleavage stimulation factor subunit 2
F8WEQ6	RALB	Ras-related protein Ral-B
Q5DX21	IGSF11	Immunoglobulin superfamily member 11 (IgSF11) (Brain and testis-specific immunoglobulin superfamily protein) (Bt-IGSF) (V-set and immunoglobulin domain-containing protein 3)
Q8IZW8	TNS4	Tensin-4 (C-terminal tensin-like protein)
F5GWF8	ATL3	Atlastin-3 (Fragment)
E7EQG2	EIF4A2	Eukaryotic initiation factor 4A-II
F8WEI3	DDX56	Probable ATP-dependent RNA helicase DDX56
P53667	LIMK1	LIM domain kinase 1 (LIMK-1) (EC 2.7.11.1)
F5H669	CPSF7	Cleavage and polyadenylation-specificity factor subunit 7 (Fragment)
K7EKD2	ANKS3	Ankyrin repeat and SAM domain-containing protein 3 (Fragment)
P62195	PSMC5	26S proteasome regulatory subunit 8 (26S proteasome AAA-ATPase subunit RPT6) (Proteasome 26S subunit ATPase 5) (Proteasome subunit p45) (Thyroid hormone receptor-interacting protein 1) (TRIP1) (p45/SUG)
A0A0G2JH91	MICB	MHC class I polypeptide-related sequence B
Q06187	BTK	Tyrosine-protein kinase BTK (EC 2.7.10.2) (Agammaglobulinemia tyrosine kinase) (ATK) (B-cell progenitor kinase) (BPK) (Bruton tyrosine kinase)
F8W8J5	VSTM2A	V-set and transmembrane domain-containing protein 2A
P57059	SIK1	Serine/threonine-protein kinase SIK1 (EC 2.7.11.1) (Salt-inducible kinase 1) (SIK-1) (Serine/threonine-protein kinase SNF1-like kinase 1) (Serine/threonine-protein kinase SNF1LK)
B5MDQ0	ERCC6L	DNA excision repair protein ERCC-6-like (FLJ20105 protein, isoform CRA_a)
Q96BZ9	TBC1D20	TBC1 domain family member 20
F5H6I7	ATL3	Atlastin-3
P41743	PRKCI	Protein kinase C iota type (EC 2.7.11.13) (Atypical protein kinase C-lambda/iota) (PRKC-lambda/iota) (aPKC-lambda/iota) (nPKC-iota)
A0A182DWF5	HLA-DPB1	HLA class II histocompatibility antigen, DP beta 1 chain (Fragment)
Q8WU68	U2AF1L4	Splicing factor U2AF 26 kDa subunit (U2 auxiliary factor 26) (U2 small nuclear RNA auxiliary factor 1-like protein 4) (U2AF1-like 4) (U2(RNU2) small nuclear RNA auxiliary factor 1-like protein 3) (U2 small nuclear RNA auxiliary factor 1-like protein 3) (U2AF1-like protein 3)
A0A075B6N2	TRBV20-1	T cell receptor beta variable 20-1
F8VXI9	GIT2	ARF GTPase-activating protein GIT2
Q5H8Y1	ROS1	Tyrosine-protein kinase receptor (EC 2.7.10.1)
Q13153	PAK1	Serine/threonine-protein kinase PAK 1 (EC 2.7.11.1) (Alpha-PAK) (p21-activated kinase 1) (PAK-1) (p65-PAK)
F5GZH3	PLEKHB1	Pleckstrin homology domain-containing family B member 1 (Fragment)
F1T0B3	DDX1	ATP-dependent RNA helicase DDX1
O14595	CTDSP2	Carboxy-terminal domain RNA polymerase II polypeptide A small phosphatase 2 (EC 3.1.3.16) (Nuclear LIM interactor-interacting factor 2) (NLI-interacting factor 2) (Protein OS-4) (Small C-terminal domain phosphatase 2) (Small CTD phosphatase 2) (SCP2)
A0A0D9SFP6	NTRK3	Tyrosine-protein kinase receptor (EC 2.7.10.1)
D6RC64	SH3BP2	SH3 domain-binding protein 2 (Fragment)
A0A075B6K0	IGLV3-16	Immunoglobulin lambda variable 3-16
Q8N815	CNTD1	Cyclin N-terminal domain-containing protein 1
A0A087WZ13	RAVER1	Ribonucleoprotein PTB-binding 1
H0YE93	OSBPL9	Oxysterol-binding protein-related protein 9 (Fragment)
D6RHY3	ANK3	Ankyrin-3 (Fragment)
E2PSN0	RBM26	RNA-binding protein 26 (Fragment)
Q96JP0	FEM1C	Protein fem-1 homolog C (FEM1c) (FEM1-gamma)
Q8N9B4	ANKRD42	Ankyrin repeat domain-containing protein 42
Q15116	PDCD1	Programmed cell death protein 1 (Protein PD-1) (hPD-1) (CD antigen CD279)
Q86YT6	MIB1	E3 ubiquitin-protein ligase MIB1 (EC 2.3.2.27) (DAPK-interacting protein 1) (DIP-1) (Mind bomb homolog 1) (RING-type E3 ubiquitin transferase MIB1) (Zinc finger ZZ type with ankyrin repeat domain protein 2)
F8WCF1	DVL3	Segment polarity protein dishevelled homolog DVL-3
D6R9F4	IBTK	Inhibitor of Bruton tyrosine kinase
O00148	DDX39A	ATP-dependent RNA helicase DDX39A (EC 3.6.4.13) (DEAD box protein 39) (Nuclear RNA helicase URH49)
Q9H0R5	GBP3	Guanylate-binding protein 3 (EC 3.6.5.-) (GTP-binding protein 3) (GBP-3) (Guanine nucleotide-binding protein 3)
E7EMB1	SWAP70	Switch-associated protein 70
Q8N3E9	PLCD3	1-phosphatidylinositol 4,5-bisphosphate phosphodiesterase delta-3 (EC 3.1.4.11) (Phosphoinositide phospholipase C-delta-3) (Phospholipase C-delta-3) (PLC-delta-3)
B1AHC2	ARHGAP8	Rho GTPase-activating protein 8 (Fragment)
I3L2E9	GRAPL	GRB2-related adapter protein-like (Fragment)
H7BY49	TIA1	Nucleolysin TIA-1 isoform p40 (Fragment)
Q3KNW3	NME9	TXNDC6 protein (Thioredoxin domain-containing protein 6)
B1ALB7	NCF2	Neutrophil cytosol factor 2 (Fragment)
A0A0D9SF53	DDX3X	ATP-dependent RNA helicase DDX3X
Q86WG5	SBF2	Myotubularin-related protein 13 (SET-binding factor 2)
Q5JZY3	EPHA10	Ephrin type-A receptor 10 (EC 2.7.10.1)
Q9Y2U5	MAP3K2	Mitogen-activated protein kinase kinase kinase 2 (EC 2.7.11.25) (MAPK/ERK kinase kinase 2) (MEK kinase 2) (MEKK 2)
Q8IVW4	CDKL3	Cyclin-dependent kinase-like 3 (EC 2.7.11.22) (Serine/threonine-protein kinase NKIAMRE)
E5RI04	ANKRD46	Ankyrin repeat domain-containing protein 46
H0YBU9	RBPMS	RNA-binding protein with multiple-splicing (Fragment)
O43861	ATP9B	Probable phospholipid-transporting ATPase IIB (EC 3.6.3.1) (ATPase class II type 9B)
A0A140T997	HLA-B	HLA class I histocompatibility antigen, B-46 alpha chain (Fragment)
P04792	HSPB1	Heat shock protein beta-1 (HspB1) (28 kDa heat shock protein) (Estrogen-regulated 24 kDa protein) (Heat shock 27 kDa protein) (HSP 27) (Stress-responsive protein 27) (SRP27)
F5H726	TCP1	T-complex protein 1 subunit alpha (Fragment)
Q29836	HLA-B	HLA class I histocompatibility antigen, B-67 alpha chain (MHC class I antigen B*67)
D6RFI7	HAPLN1	Hyaluronan and proteoglycan link protein 1 (Fragment)
A0A0U1RQJ0	DDX17	Probable ATP-dependent RNA helicase DDX17 (Fragment)
E9PNS8	JAML	Junctional adhesion molecule-like (Fragment)
H0YBC2	PIK3R1	Phosphatidylinositol 3-kinase regulatory subunit alpha (Fragment)
P56559	ARL4C	ADP-ribosylation factor-like protein 4C (ADP-ribosylation factor-like protein 7) (ADP-ribosylation factor-like protein LAK)
A0A140T9Q4	HLA-C	HLA class I histocompatibility antigen, Cw-6 alpha chain (Fragment)
Q15424	SAFB	Scaffold attachment factor B1 (SAF-B) (SAF-B1) (HSP27 estrogen response element-TATA box-binding protein) (HSP27 ERE-TATA-binding protein)
H3BT26	HAPLN3	Hyaluronan and proteoglycan link protein 3 (Fragment)
Q5JRI1	SRSF10	Serine/arginine-rich-splicing factor 10
J3QRR3	PSMC5	26S proteasome regulatory subunit 8 (Fragment)
H0YE48	TNNI3K	Serine/threonine-protein kinase TNNI3K (Fragment)
Q9NQI0	DDX4	Probable ATP-dependent RNA helicase DDX4 (EC 3.6.4.13) (DEAD box protein 4) (Vasa homolog)
R4GND0	SLAMF7	SLAM family member 7 (Fragment)
C9JY42	DGKD	Diacylglycerol kinase delta (Fragment)
A0A0G2JPY0	TBC1D3K	TBC1 domain family member 3K
Q9C0K7	STRADB	STE20-related kinase adapter protein beta (STRAD beta) (Amyotrophic lateral sclerosis 2 chromosomal region candidate gene 2 protein) (CALS-21) (ILP-interacting protein) (Pseudokinase ALS2CR2)
A0A0J9YXX5	PUF60	Poly(U)-binding-splicing factor PUF60 (Fragment)
Q9H0X9	OSBPL5	Oxysterol-binding protein-related protein 5 (ORP-5) (OSBP-related protein 5) (Oxysterol-binding protein homolog 1)
A0A0A0MT33	SCAF8	Protein SCAF8
Q9H4W6	EBF3	Transcription factor COE3 (Early B-cell factor 3) (EBF-3) (Olf-1/EBF-like 2) (O/E-2) (OE-2)
A0A140T8Z4	LY6G6D	Lymphocyte antigen 6 complex locus protein G6d
Q8IV61	RASGRP3	Ras guanyl-releasing protein 3 (Calcium and DAG-regulated guanine nucleotide exchange factor III) (Guanine nucleotide exchange factor for Rap1)
Q8N3C0	ASCC3	Activating signal cointegrator 1 complex subunit 3 (EC 3.6.4.12) (ASC-1 complex subunit p200) (ASC1p200) (Helicase, ATP binding 1) (Trip4 complex subunit p200)
Q99952	PTPN18	Tyrosine-protein phosphatase non-receptor type 18 (EC 3.1.3.48) (Brain-derived phosphatase)
I3NI05	ABR	Active breakpoint cluster region-related protein (Fragment)
A0A087WXQ7	POTEC	POTE ankyrin domain family member C
A0JD37	TRDV3	HDV103S1 (T cell receptor delta variable 3) (Fragment)
A0A0A6YYC0	RPS6KA4	Ribosomal protein S6 kinase alpha-4 (Fragment)
B7Z8K7	ARHGAP25	Rho GTPase-activating protein 25 (cDNA FLJ59112, highly similar to Rho-GTPase-activating protein 25)
H3BRD5	MYO9A	Unconventional myosin-IXa
J3QLU9	ERBB2	Receptor protein-tyrosine kinase (EC 2.7.10.1)
M0R2Q2	TIMM50	Mitochondrial import inner membrane translocase subunit TIM50 (Fragment)
M0QX12	RASAL3	RAS protein activator-like-3 (Fragment)
Q9NVP1	DDX18	ATP-dependent RNA helicase DDX18 (EC 3.6.4.13) (DEAD box protein 18) (Myc-regulated DEAD box protein) (MrDb)
A6NIW2	DOCK11	Dedicator of cytokinesis protein 11
A0A096LNH4	LOC102724488	Uncharacterized protein (Fragment)
E7EM58	STK25	Serine/threonine-protein kinase 25 (Fragment)
G8JLH9	STAT3	Signal transducer and activator of transcription
B4DUR8	CCT3	T-complex protein 1 subunit gamma
D6R9G8	SNCAIP	Synphilin-1 (Fragment)
A0A140T909	HLA-DPA1	HLA class II histocompatibility antigen, DP alpha 1 chain (Fragment)
K7EK77	ATP5F1A	ATP synthase subunit alpha, mitochondrial (Fragment)
Q16875	PFKFB3	6-phosphofructo-2-kinase/fructose-2,6-bisphosphatase 3 (6PF-2-K/Fru-2,6-P2ase 3) (PFK/FBPase 3) (6PF-2-K/Fru-2,6-P2ase brain/placenta-type isozyme) (Renal carcinoma antigen NY-REN-56) (iPFK-2) [Includes: 6-phosphofructo-2-kinase (EC 2.7.1.105); Fructose-2,6-bisphosphatase (EC 3.1.3.46)]
J3KNN3	PHKG2	Phosphorylase b kinase gamma catalytic chain, liver/testis isoform
E7ENX8		Uncharacterized protein (Fragment)
P15151	PVR	Poliovirus receptor (Nectin-like protein 5) (NECL-5) (CD antigen CD155)
A0A0G2JRN8	EHMT2	Histone-lysine N-methyltransferase EHMT2 (Fragment)
B1ALP5	KANK4	KN motif and ankyrin repeat domain-containing protein 4
A0A087WV68	TARDBP	TAR DNA-binding protein 43 (Fragment)
P30281	CCND3	G1/S-specific cyclin-D3
A0A0A0MQV9	SETD1B	Histone-lysine N-methyltransferase SETD1B
Q04826	HLA-B	HLA class I histocompatibility antigen, B-40 alpha chain (Bw-60) (MHC class I antigen B*40)
F8VXY6	ZCRB1	Zinc finger CCHC-type and RNA-binding motif-containing protein 1 (Fragment)
J3KPD6	HCK	Tyrosine-protein kinase (EC 2.7.10.2)
A0A0J9YWB2	TRBV7-9	T cell receptor beta variable 7-9 (Fragment)
Q5RJ85	HLA-G	HLA class I histocompatibility antigen, alpha chain G (HLA-G histocompatibility antigen, class I, G, isoform CRA_b)
Q9H4B4	PLK3	Serine/threonine-protein kinase PLK3 (EC 2.7.11.21) (Cytokine-inducible serine/threonine-protein kinase) (FGF-inducible kinase) (Polo-like kinase 3) (PLK-3) (Proliferation-related kinase)
H7C0K6	KIF1A	Kinesin-like protein KIF1A (Fragment)
A0A0A0MSI4	PLEKHB2	Pleckstrin homology domain-containing family B member 2
D6RA62	RPS6KA2	Ribosomal protein S6 kinase alpha-2 (Fragment)
I3L2N2	DVL2	Segment polarity protein dishevelled homolog DVL-2
F6WMF4	TRIOBP	TRIO and F-actin-binding protein (Fragment)
M0QZQ1	PSG1	Pregnancy-specific beta-1-glycoprotein 1 (Fragment)
H7C3K3	ACAP2	Arf-GAP with coiled-coil, ANK repeat and PH domain-containing protein 2 (Fragment)
D6RH01	CCNI	Cyclin-I (Fragment)
A0A0G2JNX1	HLA-G	HLA class I histocompatibility antigen, alpha chain G
E5RGU1	NBN	Nibrin (Fragment)
P21860	ERBB3	Receptor tyrosine-protein kinase erbB-3 (EC 2.7.10.1) (Proto-oncogene-like protein c-ErbB-3) (Tyrosine kinase-type cell surface receptor HER3)
Q9P2K1	CC2D2A	Coiled-coil and C2 domain-containing protein 2A
A6NHY2	ANKDD1B	Ankyrin repeat and death domain-containing protein 1B
X6RDA4	PSPC1	Paraspeckle component 1 (Fragment)
A0A140T8Y4	HLA-A	HLA class I histocompatibility antigen, A-3 alpha chain
J3KSC4	RAC3	Ras-related C3 botulinum toxin substrate 3 (Fragment)
O60890	OPHN1	Oligophrenin-1
C9JIJ1	AKT2	RAC-beta serine/threonine-protein kinase (Fragment)
Q9BZM5	ULBP2	UL16-binding protein 2 (ALCAN-alpha) (NKG2D ligand 2) (N2DL-2) (NKG2DL2) (Retinoic acid early transcript 1H)
P31943	HNRNPH1	Heterogeneous nuclear ribonucleoprotein H (hnRNP H) [Cleaved into: Heterogeneous nuclear ribonucleoprotein H, N-terminally processed]
Q01167	FOXK2	Forkhead box protein K2 (Cellular transcription factor ILF-1) (FOXK1) (Interleukin enhancer-binding factor 1)
C9JNL5	SCLY	Selenocysteine lyase (Fragment)
Q86XW9	NME9	Thioredoxin domain-containing protein 6 (Thioredoxin-like protein 2) (Txl-2)
Q5VTI5	PLEKHA6	Pleckstrin homology domain-containing family A member 6
B0QYQ2	TRIB3	Tribbles homolog 3 (Fragment)
A0A075B6S1	TRBC2	T-cell receptor beta-2 chain C region (Fragment)
Q9NW64	RBM22	Pre-mRNA-splicing factor RBM22 (RNA-binding motif protein 22) (Zinc finger CCCH domain-containing protein 16)
Q9Y5W7	SNX14	Sorting nexin-14
J3KN01	AFDN	Afadin
Q6UXZ3	CD300LD	CMRF35-like molecule 4 (CLM-4) (CD300 antigen-like family member D) (CMRF35-A4) (CD antigen CD300d)
F5H7I4	GABPB1	GA-binding protein subunit beta-1
F5H5E0	TAOK3	Serine/threonine-protein kinase TAO3 (Fragment)
F8W061	NUBPL	Iron-sulfur protein NUBPL (Fragment)
Q8TEA7	TBCK	TBC domain-containing protein kinase-like protein
A0A0B4J1X8	IGHV3-43	Immunoglobulin heavy variable 3-43
Q86V81	ALYREF	THO complex subunit 4 (Tho4) (Ally of AML-1 and LEF-1) (Aly/REF export factor) (Transcriptional coactivator Aly/REF) (bZIP-enhancing factor BEF)
E9PRZ0	MAP2K3	Dual-specificity mitogen-activated protein kinase kinase 3 (Fragment)
A0A0D9SF51	PLCB1	Phosphoinositide phospholipase C (EC 3.1.4.11) (Fragment)
H3BTA9	TBC1D21	TBC1 domain family member 21
H3BSK5	SIRPB1	Signal-regulatory protein beta-1 (Fragment)
Q96HU1	SGSM3	Small G protein signaling modulator 3 (Merlin-associated protein) (RUN and TBC1 domain-containing protein 3) (Rab-GTPase-activating protein-like protein) (RabGAPLP)
M0QYA8	VRK3	Inactive serine/threonine-protein kinase VRK3
C9JDS9	TUBA4A	Tubulin alpha-4A chain (Fragment)
P18462	HLA-A	HLA class I histocompatibility antigen, A-25 alpha chain (HLA class I histocompatibility antigen, A-10 alpha chain) (MHC class I antigen A*25)
F5GZ38	PLEKHB1	Pleckstrin homology domain-containing family B member 1 (Fragment)
Q9Y6V7	DDX49	Probable ATP-dependent RNA helicase DDX49 (EC 3.6.4.13) (DEAD box protein 49)
F5H1R4	ARHGAP45	Rho GTPase-activating protein 45
Q5S007	LRRK2	Leucine-rich repeat serine/threonine-protein kinase 2 (EC 2.7.11.1) (Dardarin)
Q9BUQ8	DDX23	Probable ATP-dependent RNA helicase DDX23 (EC 3.6.4.13) (100 kDa U5 snRNP-specific protein) (DEAD box protein 23) (PRP28 homolog) (U5-100kD)
P19087	GNAT2	Guanine nucleotide-binding protein G(t) subunit alpha-2 (Transducin alpha-2 chain)
A0A0K0K1C0	TRBV11-1	T cell receptor beta variable 11-1
E7EV07	ARHGEF4	Rho guanine nucleotide exchange factor 4
P20036	HLA-DPA1	HLA class II histocompatibility antigen, DP alpha 1 chain (DP(W3)) (DP(W4)) (HLA-SB alpha chain) (MHC class II DP3-alpha) (MHC class II DPA1)
H0YJG4	CHD8	Chromodomain-helicase-DNA-binding protein 8 (Fragment)
H3BRK5	NUBP2	Cytosolic Fe-S cluster assembly factor NUBP2
C9IZA5	VCP	Transitional endoplasmic reticulum ATPase (Fragment)
E9PJJ4	JAML	Junctional adhesion molecule-like (Fragment)
E5RFQ9	STK3	Serine/threonine-protein kinase 3 (Fragment)
A0A0C4DGG9	CHD4	Chromodomain-helicase-DNA-binding protein 4
Q5SVM7	RPS6KA1	Ribosomal protein S6 kinase alpha-1 (Fragment)
F8WE04	HSPB1	Heat shock protein beta-1
Q86SE5	RALYL	RNA-binding Raly-like protein (hRALYL) (Heterogeneous nuclear ribonucleoprotein C-like 3) (hnRNP core protein C-like 3)
E7EQ78	TRPV1	Transient receptor potential cation channel subfamily V member 1
Q86Z02	HIPK1	Homeodomain-interacting protein kinase 1 (EC 2.7.11.1) (Nuclear body-associated kinase 2)
J3KRI6	CCT6B	T-complex protein 1 subunit zeta-2 (Fragment)
O60487	MPZL2	Myelin protein zero-like protein 2 (Epithelial V-like antigen 1)
Q92734	TFG	Protein TFG (TRK-fused gene protein)
Q9Y336	SIGLEC9	Sialic acid-binding Ig-like lectin 9 (Siglec-9) (CDw329) (Protein FOAP-9) (CD antigen CD329)
A0A140T945	HLA-DOB	HLA class II histocompatibility antigen, DO beta chain (Fragment)
H0Y338	RALGPS2	Ras-specific guanine nucleotide-releasing factor RalGPS2 (Fragment)
D6RAT6	FAM13B	Protein FAM13B (Fragment)
G3V520	PRKCH	Protein kinase C eta type (Fragment)
D6RGX3	CCNG1	Cyclin-G1 (Fragment)
Q16849	PTPRN	Receptor-type tyrosine-protein phosphatase-like N (R-PTP-N) (Islet cell antigen 512) (ICA 512) (Islet cell autoantigen 3) (PTP IA-2) [Cleaved into: ICA512-N-terminal fragment (ICA512-NTF); ICA512-transmembrane fragment (ICA512-TMF); ICA512-cleaved cytosolic fragment (ICA512-CCF)]
C9J319	STK33	Serine/threonine-protein kinase 33 (Fragment)
Q5VY80	RAET1L	UL16-binding protein 6 (Retinoic acid early transcript 1L protein)
H3BT78	ULK3	Serine/threonine-protein kinase ULK3
Q9UKI8	TLK1	Serine/threonine-protein kinase tousled-like 1 (EC 2.7.11.1) (PKU-beta) (Tousled-like kinase 1)
Q5H919	HTATSF1	HIV Tat-specific factor 1 (Fragment)
O95104	SCAF4	Splicing factor, arginine/serine-rich 15 (CTD-binding SR-like protein RA4) (SR-related and CTD-associated factor 4)
E9PRC8	CCT3	T-complex protein 1 subunit gamma (Fragment)
K7EIQ7	RHOT1	Mitochondrial Rho GTPase 1 (Fragment)
A0A0B4J240	TRAV10	T cell receptor alpha variable 10
H0Y8D9	U2SURP	U2 snRNP-associated SURP motif-containing protein (Fragment)
Q7L804	RAB11FIP2	Rab11 family-interacting protein 2 (Rab11-FIP2) (NRip11)
Q9Y4H2	IRS2	Insulin receptor substrate 2 (IRS-2)
Q9NX57	RAB20	Ras-related protein Rab-20
D6RHE1	ANK2	Ankyrin-2 (Fragment)
H7C3V9	SCLY	Selenocysteine lyase (Fragment)
Q12923	PTPN13	Tyrosine-protein phosphatase non-receptor type 13 (EC 3.1.3.48) (Fas-associated protein-tyrosine phosphatase 1) (FAP-1) (PTP-BAS) (Protein-tyrosine phosphatase 1E) (PTP-E1) (hPTPE1) (Protein-tyrosine phosphatase PTPL1)
E9PNB9	RAB30	Ras-related protein Rab-30
A0A087WTD7	AKAP13	A-kinase anchor protein 13
E9PR46	DDX25	ATP-dependent RNA helicase DDX25 (Fragment)
A0A0D9SER5	CDK11B	Cyclin-dependent kinase 11B
H7C0A7	AGAP1	Arf-GAP with GTPase, ANK repeat and PH domain-containing protein 1 (Fragment)
Q13163	MAP2K5	Dual specificity mitogen-activated protein kinase kinase 5 (MAP kinase kinase 5) (MAPKK 5) (EC 2.7.12.2) (MAPK/ERK kinase 5) (MEK 5)
E9PAP0	LCK	Tyrosine-protein kinase Lck (Fragment)
Q5JP53	TUBB	Tubulin beta chain
B4DZ74	RDM1	RAD52 motif-containing protein 1 (cDNA FLJ60198, highly similar to Homo sapiens RAD52 motif 1 (RDM1), transcript variant 2, mRNA)
H3BTI9	PHKG2	Phosphorylase b kinase gamma catalytic chain, liver/testis isoform (Fragment)
Q8N556	AFAP1	Actin filament-associated protein 1 (110 kDa actin filament-associated protein) (AFAP-110)
Q86WC6	PPP1R27	Protein phosphatase 1 regulatory subunit 27 (Dysferlin-interacting protein 1) (Toonin)
A0A0C4DH60	STK33	Serine/threonine-protein kinase 33 (Fragment)
H7C4S5	BRAF	Serine/threonine-protein kinase B-raf (Fragment)
G3V2I6	AKT1	RAC-alpha serine/threonine-protein kinase (Fragment)
A0A075B6H9	IGLV4-69	Immunoglobulin lambda variable 4-69
P13765	HLA-DOB	HLA class II histocompatibility antigen, DO beta chain (MHC class II antigen DOB)
A8MSP2	RAB37	RAB37, member RAS oncogene family, isoform CRA_e (Ras-related protein Rab-37) (cDNA FLJ45130 fis, clone BRAWH3037428, highly similar to Homo sapiens RAB37, member RAS oncogene family (RAB37), transcript variant 3, mRNA)
H7C3G9	NAGK	N-acetyl-D-glucosamine kinase
P10398	ARAF	Serine/threonine-protein kinase A-Raf (EC 2.7.11.1) (Proto-oncogene A-Raf) (Proto-oncogene A-Raf-1) (Proto-oncogene Pks)
Q5JX61	CPNE1	Copine-1 (Fragment)
R4GN27	KIF12	Kinesin-like protein
O00238	BMPR1B	Bone morphogenetic protein receptor type-1B (BMP type-1B receptor) (BMPR-1B) (EC 2.7.11.30) (CD antigen CDw293)
B1APG2	PRKACB	cAMP-dependent protein kinase catalytic subunit beta (Fragment)
Q969T7	NT5C3B	7-methylguanosine phosphate-specific 5'-nucleotidase (7-methylguanosine nucleotidase) (EC 3.1.3.91) (Cytosolic 5'-nucleotidase 3B) (Cytosolic 5'-nucleotidase III-like protein) (cN-III-like protein) (EC 3.1.3.5) (N(7)-methylguanylate 5'-phosphatase)
O75563	SKAP2	Src kinase-associated phosphoprotein 2 (Pyk2/RAFTK-associated protein) (Retinoic acid-induced protein 70) (SKAP55 homolog) (SKAP-55HOM) (SKAP-HOM) (Src family-associated phosphoprotein 2) (Src kinase-associated phosphoprotein 55-related protein) (Src-associated adapter protein with PH and SH3 domains)
H7C1A1	NPR2	Atrial natriuretic peptide receptor 2 (Fragment)
P27037	ACVR2A	Activin receptor type-2A (EC 2.7.11.30) (Activin receptor type IIA) (ACTR-IIA) (ACTRIIA)
M0R0E4	PSG9	Pregnancy-specific beta-1-glycoprotein 9
A0A087X241	SGSM1	Small G protein-signaling modulator 1
O95944	NCR2	Natural cytotoxicity triggering receptor 2 (Lymphocyte antigen 95 homolog) (NK cell-activating receptor) (Natural killer cell p44-related protein) (NK-p44) (NKp44) (CD antigen CD336)
Q86Y07	VRK2	Serine/threonine-protein kinase VRK2 (EC 2.7.11.1) (Vaccinia-related kinase 2)
C9JM09	ASNS	Asparagine synthetase [glutamine-hydrolyzing] (Fragment)
Q9BR61	ACBD6	Acyl-CoA-binding domain-containing protein 6
Q16827	PTPRO	Receptor-type tyrosine-protein phosphatase O (R-PTP-O) (EC 3.1.3.48) (Glomerular epithelial protein 1) (Protein tyrosine phosphatase U2) (PTP-U2) (PTPase U2)
P05771	PRKCB	Protein kinase C beta type (PKC-B) (PKC-beta) (EC 2.7.11.13)
H7C0V3	CHN2	Beta-chimaerin (Fragment)
A0A0G2JI36	HLA-A	HLA class I histocompatibility antigen, A-3 alpha chain
H7BYJ3	CIT	Citron Rho-interacting kinase (Fragment)
Q8WWH4	ASZ1	Ankyrin repeat, SAM and basic leucine zipper domain-containing protein 1 (Ankyrin-like protein 1) (Germ cell-specific ankyrin, SAM and basic leucine zipper domain-containing protein)
A0A140T9B7	HLA-F	HLA class I histocompatibility antigen, alpha chain F
Q8NB59	SYT14	Synaptotagmin-14 (Synaptotagmin XIV) (SytXIV)
A0A1B0GX78	TRBV12-5	T cell receptor beta variable 12-5
C9JA17	ATP6V1A	V-type proton ATPase catalytic subunit A (Fragment)
A0A140T9Z4	HLA-C	HLA class I histocompatibility antigen, Cw-6 alpha chain
P21359	NF1	Neurofibromin (Neurofibromatosis-related protein NF-1) [Cleaved into: Neurofibromin truncated]
Q6ICB4	FAM109B	Sesquipedalian-2 (Ses2) (27 kDa inositol polyphosphate phosphatase interacting protein B) (IPIP27B)
A0A140T9M0	HLA-C	HLA class I histocompatibility antigen, Cw-6 alpha chain
F8W059	UNC13A	Protein unc-13 homolog A
O75916	RGS9	Regulator of G-protein signaling 9 (RGS9)
E7EQR6	TCP1	T-complex protein 1 subunit alpha
Q9GZV7	HAPLN2	Hyaluronan and proteoglycan link protein 2 (Brain link protein 1)
E5RGC4	PABPC1	Polyadenylate-binding protein 1 (Fragment)
B4DHE8	MSI2	RNA-binding protein Musashi homolog 2 (cDNA FLJ56904, highly similar to RNA-binding protein Musashi homolog 2)
Q9P1W9	PIM2	Serine/threonine-protein kinase pim-2 (EC 2.7.11.1) (Pim-2h)
E9PID8	CSTF2	Cleavage stimulation factor subunit 2
Q96CN4	EVI5L	EVI5-like protein (Ecotropic viral integration site 5-like protein)
D6RDY0	RIMS2	Regulating synaptic membrane exocytosis protein 2 (Fragment)
Q9UPU7	TBC1D2B	TBC1 domain family member 2B
E9PJX5	BLK	Tyrosine-protein kinase (EC 2.7.10.2)
Q14644	RASA3	Ras GTPase-activating protein 3 (GAP1(IP4BP)) (Ins P4-binding protein)
E5RG71	RALYL	RNA-binding Raly-like protein (Fragment)
Q12852	MAP3K12	Mitogen-activated protein kinase kinase kinase 12 (EC 2.7.11.25) (Dual leucine zipper bearing kinase) (DLK) (Leucine-zipper protein kinase) (ZPK) (MAPK-upstream kinase) (MUK) (Mixed lineage kinase)
P01717	IGLV3-25	Immunoglobulin lambda variable 3-25 (Ig lambda chain V-IV region Hil)
C9JHS6	AKT2	RAC-beta serine/threonine-protein kinase (Fragment)
A0A087WZ06	STK3	Serine/threonine-protein kinase 3
K7EPD3	NEK8	Serine/threonine-protein kinase Nek8 (Fragment)
A0A0K0K1A5	TRBV6-5	T cell receptor beta variable 6-5
K7ENT7	WNK4	Serine/threonine-protein kinase WNK4
A5PLL1	ANKRD34B	Ankyrin repeat domain-containing protein 34B
P63000	RAC1	Ras-related C3 botulinum toxin substrate 1 (Cell migration-inducing gene 5 protein) (Ras-like protein TC25) (p21-Rac1)
P04899	GNAI2	Guanine nucleotide-binding protein G(i) subunit alpha-2 (Adenylate cyclase-inhibiting G alpha protein)
E7EPP6	CHEK1	Serine/threonine-protein kinase Chk1
P54764	EPHA4	Ephrin type-A receptor 4 (EC 2.7.10.1) (EPH-like kinase 8) (EK8) (hEK8) (Tyrosine-protein kinase TYRO1) (Tyrosine-protein kinase receptor SEK)
A0A140T8Y5	DHX16	Pre-mRNA-splicing factor ATP-dependent RNA helicase DHX16
Q8WTQ7	GRK7	Rhodopsin kinase (EC 2.7.11.14) (G protein-coupled receptor kinase 7) (G protein-coupled receptor kinase GRK7)
H3BN78	SYT17	Synaptotagmin-17
J3KN75	TBC1D8B	TBC1 domain family member 8B
Q9P2D1	CHD7	Chromodomain-helicase-DNA-binding protein 7 (CHD-7) (EC 3.6.4.12) (ATP-dependent helicase CHD7)
Q05209	PTPN12	Tyrosine-protein phosphatase non-receptor type 12 (EC 3.1.3.48) (PTP-PEST) (Protein-tyrosine phosphatase G1) (PTPG1)
Q92932	PTPRN2	Receptor-type tyrosine-protein phosphatase N2 (R-PTP-N2) (EC 3.1.3.-) (EC 3.1.3.48) (Islet cell autoantigen-related protein) (IAR) (ICAAR) (Phogrin) [Cleaved into: IA-2beta60]
F5H004	RAP1B	Ras-related protein Rap-1b (Fragment)
K7ES41	RAB27B	Ras-related protein Rab-27B (Fragment)
H3BV80	RNPS1	RNA-binding protein with serine-rich domain 1
Q5TGY6	FGR	Tyrosine-protein kinase (EC 2.7.10.2) (Fragment)
Q8N2I9	STK40	Serine/threonine-protein kinase 40 (EC 2.7.11.1) (SINK-homologous serine/threonine-protein kinase) (Sugen kinase 495) (SgK495)
C9JMW0	IGSF11	Immunoglobulin superfamily member 11
Q52WX2	SBK1	Serine/threonine-protein kinase SBK1 (EC 2.7.11.1) (SH3-binding kinase 1)
P04222	HLA-C	HLA class I histocompatibility antigen, Cw-3 alpha chain (MHC class I antigen Cw*3)
Q8NER5	ACVR1C	Activin receptor type-1C (EC 2.7.11.30) (Activin receptor type IC) (ACTR-IC) (Activin receptor-like kinase 7) (ALK-7)
Q13310	PABPC4	Polyadenylate-binding protein 4 (PABP-4) (Poly(A)-binding protein 4) (Activated-platelet protein 1) (APP-1) (Inducible poly(A)-binding protein) (iPABP)
M0R257	RAB3A	Ras-related protein Rab-3A (Fragment)
Q5SSB8	MOG	Myelin-oligodendrocyte glycoprotein
C9J081	DDX3Y	ATP-dependent RNA helicase DDX3Y (Fragment)
G3V235	CCNK	Cyclin-K (Fragment)
E9PK85	RRAS2	Ras-related protein R-Ras2 (Fragment)
Q9Y2T1	AXIN2	Axin-2 (Axin-like protein) (Axil) (Axis inhibition protein 2) (Conductin)
Q13588	GRAP	GRB2-related adapter protein
Q7LC14	NFKBIE	NF-kappa-B inhibitor epsilon (NFKBIE protein) (cDNA FLJ61640, highly similar to NF-kappa-B inhibitor epsilon)
H0YA20	DGKQ	Diacylglycerol kinase (DAG kinase) (EC 2.7.1.107) (Fragment)
H3BRE1	NUBP2	Cytosolic Fe-S cluster assembly factor NUBP2 (Fragment)
M0QXR5	CEACAM3	Carcinoembryonic antigen-related cell adhesion molecule 3 (Fragment)
Q5TIG5	AFDN	Afadin
B1AH78	RAC2	Ras-related C3 botulinum toxin substrate 2 (Fragment)
C9JIH8	STK25	Serine/threonine-protein kinase 25 (Fragment)
Q96S53	TESK2	Dual specificity testis-specific protein kinase 2 (EC 2.7.12.1) (Testicular protein kinase 2)
Q92882	OSTF1	Osteoclast-stimulating factor 1
Q9Y426	C2CD2	C2 domain-containing protein 2 (Transmembrane protein 24-like)
E9PBG7	CAMK2D	Calcium/calmodulin-dependent protein kinase type II subunit delta
P31483	TIA1	Nucleolysin TIA-1 isoform p40 (RNA-binding protein TIA-1) (T-cell-restricted intracellular antigen-1) (TIA-1) (p40-TIA-1)
Q9Y279	VSIG4	V-set and immunoglobulin domain-containing protein 4 (Protein Z39Ig)
A0A0A0MS09	IGHD	Immunoglobulin heavy constant delta (Fragment)
Q9NW61	PLEKHJ1	Pleckstrin homology domain-containing family J member 1 (PH domain-containing family J member 1) (Guanine nucleotide-releasing protein x)
C9JWP2	PSG4	Pregnancy-specific beta-1-glycoprotein 4 (Fragment)
D6RDL7	FAM13B	Protein FAM13B (Fragment)
P61604	HSPE1	10 kDa heat shock protein, mitochondrial (Hsp10) (10 kDa chaperonin) (Chaperonin 10) (CPN10) (Early-pregnancy factor) (EPF)
P04629	NTRK1	High affinity nerve growth factor receptor (EC 2.7.10.1) (Neurotrophic tyrosine kinase receptor type 1) (TRK1-transforming tyrosine kinase protein) (Tropomyosin-related kinase A) (Tyrosine kinase receptor) (Tyrosine kinase receptor A) (Trk-A) (gp140trk) (p140-TrkA)
Q9UEL6	MPZL1	Myelin protein zero-like protein 1 (Fragment)
Q6UXE8	BTNL3	Butyrophilin-like protein 3 (Butyrophilin-like receptor)
H0YJ40	SLIRP	SRA stem-loop-interacting RNA-binding protein, mitochondrial (Fragment)
Q31610	HLA-B	HLA class I histocompatibility antigen, B-81 alpha chain (B'DT) (MHC class I antigen B*81)
H0Y9S6	RAB28	Ras-related protein Rab-28 (Fragment)
Q2WGJ9	FER1L6	Fer-1-like protein 6
B7WPD9	KIF26B	Kinesin-like protein KIF26B
A0A599	TRBV5-6	T cell receptor beta variable 5-6
Q5JX44	CPNE1	Copine-1 (Fragment)
P17948	FLT1	Vascular endothelial growth factor receptor 1 (VEGFR-1) (EC 2.7.10.1) (Fms-like tyrosine kinase 1) (FLT-1) (Tyrosine-protein kinase FRT) (Tyrosine-protein kinase receptor FLT) (FLT) (Vascular permeability factor receptor)
F6S093	HLA-DMA	HLA class II histocompatibility antigen, DM alpha chain (Fragment)
P27361	MAPK3	Mitogen-activated protein kinase 3 (MAP kinase 3) (MAPK 3) (EC 2.7.11.24) (ERT2) (Extracellular signal-regulated kinase 1) (ERK-1) (Insulin-stimulated MAP2 kinase) (MAP kinase isoform p44) (p44-MAPK) (Microtubule-associated protein 2 kinase) (p44-ERK1)
C9JXG8	RANBP1	Ran-specific GTPase-activating protein (Fragment)
P21709	EPHA1	Ephrin type-A receptor 1 (hEpha1) (EC 2.7.10.1) (EPH tyrosine kinase) (EPH tyrosine kinase 1) (Erythropoietin-producing hepatoma receptor) (Tyrosine-protein kinase receptor EPH)
A9YTQ3	AHRR	Aryl hydrocarbon receptor repressor (AhR repressor) (AhRR) (Class E basic helix-loop-helix protein 77) (bHLHe77)
Q14011	CIRBP	Cold-inducible RNA-binding protein (A18 hnRNP) (Glycine-rich RNA-binding protein CIRP)
E5RGP3	PLEKHA2	Pleckstrin homology domain-containing family A member 2 (Fragment)
Q32P51	HNRNPA1L2	Heterogeneous nuclear ribonucleoprotein A1-like 2 (hnRNP A1-like 2) (hnRNP core protein A1-like 2)
P08754	GNAI3	Guanine nucleotide-binding protein G(k) subunit alpha (G(i) alpha-3)
V9GYF5	ARHGEF2	Rho guanine nucleotide exchange factor 2 (Fragment)
P10321	HLA-C	HLA class I histocompatibility antigen, Cw-7 alpha chain (MHC class I antigen Cw*7)
H0YBZ1	PTK2	Focal adhesion kinase 1 (Fragment)
F6UJY9	HYI	Putative hydroxypyruvate isomerase (Fragment)
A0A087X2D0	SRSF3	Serine/arginine-rich-splicing factor 3
F8VWV9	TUBA1B	Tubulin alpha-1B chain (Fragment)
F8W079	ATP5F1B	ATP synthase subunit beta, mitochondrial (Fragment)
P17980	PSMC3	26S proteasome regulatory subunit 6A (26S proteasome AAA-ATPase subunit RPT5) (Proteasome 26S subunit ATPase 3) (Proteasome subunit P50) (Tat-binding protein 1) (TBP-1)
A0A0A0MQU4	SCLY	Selenocysteine lyase
G3V251	HNRNPC	Heterogeneous nuclear ribonucleoproteins C1/C2 (Fragment)
P06576	ATP5F1B	ATP synthase subunit beta, mitochondrial (EC 3.6.3.14) (ATP synthase F1 subunit beta)
E5RJY4	ITK	Tyrosine-protein kinase ITK/TSK
C9J4A7		Uncharacterized protein (Fragment)
P43487	RANBP1	Ran-specific GTPase-activating protein (Ran-binding protein 1) (RanBP1)
S4R460	IGHV3OR16-9	Immunoglobulin heavy variable 3/OR16-9 (non-functional)
A0A140T951	HLA-B	HLA class I histocompatibility antigen, B-46 alpha chain (Fragment)
A0A0G2JJ55	MICA	MHC class I polypeptide-related sequence A
Q5SVM6	RPS6KA1	Ribosomal protein S6 kinase alpha-1 (Fragment)
Q04759	PRKCQ	Protein kinase C theta type (EC 2.7.11.13) (nPKC-theta)
Q96SB4	SRPK1	SRSF protein kinase 1 (EC 2.7.11.1) (SFRS protein kinase 1) (Serine/arginine-rich protein-specific kinase 1) (SR-protein-specific kinase 1)
H0YEJ2	WEE1	Wee1-like protein kinase (Fragment)
F8VNX2	PFKM	ATP-dependent 6-phosphofructokinase, muscle type (Fragment)
A0A1B0GUL7		Uncharacterized protein
F8W184	CTDSP2	Carboxy-terminal domain RNA polymerase II polypeptide A small phosphatase 2
O75832	PSMD10	26S proteasome non-ATPase regulatory subunit 10 (26S proteasome regulatory subunit p28) (Gankyrin) (p28(GANK))
G5E9Y3	ARAP3	Arf-GAP with Rho-GAP domain, ANK repeat and PH domain-containing protein 3 (Centaurin, delta 3, isoform CRA_b)
Q9H3Y6	SRMS	Tyrosine-protein kinase Srms (EC 2.7.10.2)
A0A087WTT1	PABPC1	Polyadenylate-binding protein (PABP)
Q15262	PTPRK	Receptor-type tyrosine-protein phosphatase kappa (Protein-tyrosine phosphatase kappa) (R-PTP-kappa) (EC 3.1.3.48)
O14559	ARHGAP33	Rho GTPase-activating protein 33 (Rho-type GTPase-activating protein 33) (Sorting nexin-26) (Tc10/CDC42 GTPase-activating protein)
A0A0B4J1S7	PTPN22	Tyrosine-protein phosphatase (EC 3.1.3.48)
K7EN81	UNC13D	Protein unc-13 homolog D (Fragment)
A0A0J9YVT0		Deleted.
Q5VYY1	ANKRD22	Ankyrin repeat domain-containing protein 22
Q6S8J7	POTEA	POTE ankyrin domain family member A (ANKRD26-like family A member 1) (Prostate, ovary, testis-expressed protein on chromosome 8) (POTE-8)
Q5MAI5	CDKL4	Cyclin-dependent kinase-like 4 (EC 2.7.11.22)
Q9NY93	DDX56	Probable ATP-dependent RNA helicase DDX56 (EC 3.6.4.13) (ATP-dependent 61 kDa nucleolar RNA helicase) (DEAD box protein 21) (DEAD box protein 56)
P79483	HLA-DRB3	HLA class II histocompatibility antigen, DR beta 3 chain (MHC class II antigen DRB3)
G3V346	SRP54	Signal recognition particle 54 kDa protein (Fragment)
K7EL04	NEK8	Serine/threonine-protein kinase Nek8
D6RAS9	RASGRF2	Ras-specific guanine nucleotide-releasing factor 2
P26368	U2AF2	Splicing factor U2AF 65 kDa subunit (U2 auxiliary factor 65 kDa subunit) (hU2AF(65)) (hU2AF65) (U2 snRNP auxiliary factor large subunit)
A0A140T8Z5	HLA-DQB1	HLA class II histocompatibility antigen, DQ beta 1 chain (MHC class II antigen)
C9JR22	PRKCE	Protein kinase C epsilon type (Fragment)
Q9Y6R4	MAP3K4	Mitogen-activated protein kinase kinase kinase 4 (EC 2.7.11.25) (MAP three kinase 1) (MAPK/ERK kinase kinase 4) (MEK kinase 4) (MEKK 4)
J3KQ37	RGPD8	RANBP2-like and GRIP domain-containing protein 8
Q96I25	RBM17	Splicing factor 45 (45 kDa-splicing factor) (RNA-binding motif protein 17)
E5RIU6	CDK1	Cyclin-dependent kinase 1 (Fragment)
A0A087WUE1		Deleted.
I3L4U4	TBC1D16	TBC1 domain family member 16 (Fragment)
B1AVT0	CLK2	Dual-specificity protein kinase CLK2
Q6DN14	MCTP1	Multiple C2 and transmembrane domain-containing protein 1
B3VCF4	CHN2	Beta chimaerin isoform B1-CHNdel ex9,11 (Beta-chimaerin)
P13746	HLA-A	HLA class I histocompatibility antigen, A-11 alpha chain (MHC class I antigen A*11)
E9PM61	RBM4B	RNA-binding protein 4B
B4DLF1	CSNK1D	Casein kinase I isoform delta (cDNA FLJ50568, highly similar to Casein kinase I isoform delta (EC 2.7.11.1))
O14640	DVL1	Segment polarity protein dishevelled homolog DVL-1 (Dishevelled-1) (DSH homolog 1)
G5E9C7	MAP2K2	Dual-specificity mitogen-activated protein kinase kinase 2 (Mitogen-activated protein kinase kinase 2, isoform CRA_b)
E9PF55	TNS1	Tensin-1
P36404	ARL2	ADP-ribosylation factor-like protein 2
F8VSH4	NUAK1	NUAK family SNF1-like kinase 1 (Fragment)
P62995	TRA2B	Transformer-2 protein homolog beta (TRA-2 beta) (TRA2-beta) (hTRA2-beta) (Splicing factor, arginine/serine-rich 10) (Transformer-2 protein homolog B)
P52564	MAP2K6	Dual specificity mitogen-activated protein kinase kinase 6 (MAP kinase kinase 6) (MAPKK 6) (EC 2.7.12.2) (MAPK/ERK kinase 6) (MEK 6) (Stress-activated protein kinase kinase 3) (SAPK kinase 3) (SAPKK-3) (SAPKK3)
A0A075B6R6	TRGC2	T-cell receptor gamma-2 chain C region (Fragment)
A0A0J9YXG1	EPHB6	Ephrin type-B receptor 6 (Fragment)
Q495V5	POTEB	POTE ankyrin domain family member B (POTE ankyrin domain family member B2) (POTEB protein)
Q5T8J1	CCND3	G1/S-specific cyclin-D3
O15068	MCF2L	Guanine nucleotide exchange factor DBS (DBL's big sister) (MCF2-transforming sequence-like protein)
H7C224	IRAK1	Interleukin-1 receptor-associated kinase 1 (Fragment)
A0A0A0MTT6	CEACAM7	Carcinoembryonic antigen-related cell adhesion molecule 7
O00194	RAB27B	Ras-related protein Rab-27B (C25KG)
Q13332	PTPRS	Receptor-type tyrosine-protein phosphatase S (R-PTP-S) (EC 3.1.3.48) (Receptor-type tyrosine-protein phosphatase sigma) (R-PTP-sigma)
P07947	YES1	Tyrosine-protein kinase Yes (EC 2.7.10.2) (Proto-oncogene c-Yes) (p61-Yes)
A0A096LNP0		Deleted.
E5RGW5	IKBKB	Inhibitor of nuclear factor kappa-B kinase subunit beta
O14646	CHD1	Chromodomain-helicase-DNA-binding protein 1 (CHD-1) (EC 3.6.4.12) (ATP-dependent helicase CHD1)
P46459	NSF	Vesicle-fusing ATPase (EC 3.6.4.6) (N-ethylmaleimide-sensitive fusion protein) (NEM-sensitive fusion protein) (Vesicular-fusion protein NSF)
H0YJR4	SHE	SH2 domain-containing adapter protein E (Fragment)
A0A0D9SFZ2	CDK8	Cyclin-dependent kinase 8 (Fragment)
Q14147	DHX34	Probable ATP-dependent RNA helicase DHX34 (EC 3.6.4.13) (DEAH box protein 34)
G3V304	PRKCH	Protein kinase C eta type (Fragment)
Q6DT37	CDC42BPG	Serine/threonine-protein kinase MRCK gamma (EC 2.7.11.1) (CDC42-binding protein kinase gamma) (DMPK-like gamma) (Myotonic dystrophy kinase-related CDC42-binding kinase gamma) (MRCK gamma) (MRCKG) (Myotonic dystrophy protein kinase-like gamma) (Myotonic dystrophy protein kinase-like alpha)
Q86YN6	PPARGC1B	Peroxisome proliferator-activated receptor gamma coactivator 1-beta (PGC-1-beta) (PPAR-gamma coactivator 1-beta) (PPARGC-1-beta) (PGC-1-related estrogen receptor alpha coactivator)
Q8WWW8	GAB3	GRB2-associated-binding protein 3 (GRB2-associated binder 3) (Growth factor receptor bound protein 2-associated protein 3)
E9PFP1	PIK3R2	Phosphatidylinositol 3-kinase regulatory subunit beta
A0A087X187	POTEM	Putative POTE ankyrin domain family member M
P50613	CDK7	Cyclin-dependent kinase 7 (EC 2.7.11.22) (EC 2.7.11.23) (39 kDa protein kinase) (p39 Mo15) (CDK-activating kinase 1) (Cell division protein kinase 7) (Serine/threonine-protein kinase 1) (TFIIH basal transcription factor complex kinase subunit)
J3QQN8	NF1	Neurofibromin (Fragment)
Q8IX18	DHX40	Probable ATP-dependent RNA helicase DHX40 (EC 3.6.4.13) (DEAH box protein 40) (Protein PAD)
A0A140T939	HLA-F	HLA class I histocompatibility antigen, alpha chain F (Fragment)
J3QLK5	TLK2	Serine/threonine-protein kinase tousled-like 2
A0A140T972	DDR1	Epithelial discoidin domain-containing receptor 1 (Fragment)
Q9Y4C8	RBM19	Probable RNA-binding protein 19 (RNA-binding motif protein 19)
Q5HYF5	TBCK	TBC domain-containing protein kinase-like protein
A0A0G2JK64	EHMT2	Histone-lysine N-methyltransferase EHMT2
A0A0G2JI43	HLA-DMB	HLA class II histocompatibility antigen, DM beta chain
Q99570	PIK3R4	Phosphoinositide 3-kinase regulatory subunit 4 (PI3-kinase regulatory subunit 4) (EC 2.7.11.1) (PI3-kinase p150 subunit) (Phosphoinositide 3-kinase adaptor protein)
H0YEM1	PUF60	Poly(U)-binding-splicing factor PUF60 (Fragment)
Q9NVM6	DNAJC17	DnaJ homolog subfamily C member 17
A0A0G2JQJ0	IGKV1D-8	Immunoglobulin kappa variable 1D-8 (Fragment)
A0A0A0MS06	TRBV23-1	T cell receptor beta variable 23-1 (non-functional) (Fragment)
J3KT55	PTPRM	Receptor-type tyrosine-protein phosphatase mu (Fragment)
H0YN48	UACA	Uveal autoantigen with coiled-coil domains and ankyrin repeats (Fragment)
D6RC59	HAPLN1	Hyaluronan and proteoglycan link protein 1 (Fragment)
H0Y873	AGAP3	Arf-GAP with GTPase, ANK repeat and PH domain-containing protein 3 (Fragment)
B7Z6P0	NUBP2	Cytosolic Fe-S cluster assembly factor NUBP2 (Nucleotide binding protein 2 (MinD homolog, E. coli), isoform CRA_d) (cDNA FLJ57200, highly similar to Nucleotide-binding protein 2)
J3KPJ3	CAMKK1	Calcium/calmodulin-dependent protein kinase kinase 1
Q504U8	EGFR	Receptor protein-tyrosine kinase (EC 2.7.10.1)
Q9Y2N7	HIF3A	Hypoxia-inducible factor 3-alpha (HIF-3-alpha) (HIF3-alpha) (Basic-helix-loop-helix-PAS protein MOP7) (Class E basic helix-loop-helix protein 17) (bHLHe17) (HIF3-alpha-1) (Inhibitory PAS domain protein) (IPAS) (Member of PAS protein 7) (PAS domain-containing protein 7)
A8K4G0	CD300LB	CMRF35-like molecule 7 (CLM-7) (CD300 antigen-like family member B) (CMRF35-A2) (Immune receptor expressed on myeloid cells 3) (IREM-3) (Leukocyte mono-Ig-like receptor 5) (Triggering receptor expressed on myeloid cells 5) (TREM-5) (CD antigen CD300b)
Q05655	PRKCD	Protein kinase C delta type (EC 2.7.11.13) (Tyrosine-protein kinase PRKCD) (EC 2.7.10.2) (nPKC-delta) [Cleaved into: Protein kinase C delta type regulatory subunit; Protein kinase C delta type catalytic subunit (Sphingosine-dependent protein kinase-1) (SDK1)]
F8W7W8	HFE	Hereditary hemochromatosis protein
F8WE42	NOL8	Nucleolar protein 8 (Fragment)
A0A140T9Z3	HLA-DOB	HLA class II histocompatibility antigen, DO beta chain (Fragment)
H3BTC0	RNPS1	RNA-binding protein with serine-rich domain 1 (Fragment)
C9JQQ1	RHEBL1	GTPase RhebL1
O60282	KIF5C	Kinesin heavy chain isoform 5C (Kinesin heavy chain neuron-specific 2)
E5RFK5	CCNC	Cyclin-C
Q9UPZ9	ICK	Serine/threonine-protein kinase ICK (EC 2.7.11.1) (Intestinal cell kinase) (hICK) (Laryngeal cancer kinase 2) (LCK2) (MAK-related kinase) (MRK)
Q7Z5H3	ARHGAP22	Rho GTPase-activating protein 22 (Rho-type GTPase-activating protein 22)
A0A087X2F4	TRDV1	T cell receptor delta variable 1
I3L136	PKMYT1	Membrane-associated tyrosine- and threonine-specific cdc2-inhibitory kinase (Fragment)
Q9BW19	KIFC1	Kinesin-like protein KIFC1 (Kinesin-like protein 2) (Kinesin-related protein HSET)
A0A0A0MSK6	ARHGAP5	Rho GTPase-activating protein 5
Q08345	DDR1	Epithelial discoidin domain-containing receptor 1 (Epithelial discoidin domain receptor 1) (EC 2.7.10.1) (CD167 antigen-like family member A) (Cell adhesion kinase) (Discoidin receptor tyrosine kinase) (HGK2) (Mammary carcinoma kinase 10) (MCK-10) (Protein-tyrosine kinase 3A) (Protein-tyrosine kinase RTK-6) (TRK E) (Tyrosine kinase DDR) (Tyrosine-protein kinase CAK) (CD antigen CD167a)
H0Y5J9	TRIOBP	TRIO and F-actin-binding protein (Fragment)
A0A087WTK0	PTPRJ	Receptor-type tyrosine-protein phosphatase eta
P10809	HSPD1	60 kDa heat shock protein, mitochondrial (EC 3.6.4.9) (60 kDa chaperonin) (Chaperonin 60) (CPN60) (Heat shock protein 60) (HSP-60) (Hsp60) (HuCHA60) (Mitochondrial matrix protein P1) (P60 lymphocyte protein)
P49758	RGS6	Regulator of G-protein signaling 6 (RGS6) (S914)
G3V3X1	AKT1	RAC-alpha serine/threonine-protein kinase (Fragment)
B0QYV8	ARFGAP3	ADP-ribosylation factor GTPase-activating protein 3 (Fragment)
C9J8J7	HHLA2	HERV-H LTR-associating protein 2 (Fragment)
Q01968	OCRL	Inositol polyphosphate 5-phosphatase OCRL-1 (EC 3.1.3.36) (Lowe oculocerebrorenal syndrome protein)
D6RIH9	HNRNPH1	Heterogeneous nuclear ribonucleoprotein H
P51946	CCNH	Cyclin-H (MO15-associated protein) (p34) (p37)
J3QSF1	DDX5	Probable ATP-dependent RNA helicase DDX5 (Fragment)
B1AH58	IFT27	Intraflagellar transport protein 27 homolog (Fragment)
C9IYI6	PTPN7	Tyrosine-protein phosphatase non-receptor type 7 (Fragment)
A0A075B7D0	IGHV1OR15-1	Immunoglobulin heavy variable 1/OR15-1 (non-functional) (Fragment)
A0A0G2JKJ1	HLA-C	HLA class I histocompatibility antigen, Cw-6 alpha chain
J3KQA0	SYT1	Synaptotagmin I, isoform CRA_b (Synaptotagmin-1)				ϋ_x0008_‰’$·=PΓ_x0002_
H7C264	ADAP1	Arf-GAP with dual PH domain-containing protein 1 (Fragment)
P61224	RAP1B	Ras-related protein Rap-1b (GTP-binding protein smg p21B)
Q5SP00	HLA-DMA	HLA class II histocompatibility antigen, DM alpha chain
M0R0A9	FCGRT	IgG receptor FcRn large subunit p51
Q495A1	TIGIT	T-cell immunoreceptor with Ig and ITIM domains (V-set and immunoglobulin domain-containing protein 9) (V-set and transmembrane domain-containing protein 3)
Q9BZL6	PRKD2	Serine/threonine-protein kinase D2 (EC 2.7.11.13) (nPKC-D2)
E5RJR1	MCTP1	Multiple C2 and transmembrane domain-containing protein 1 (Fragment)
F6VDE0	SMARCA2	Probable global transcription activator SNF2L2
H0Y3G9	SYT8	Synaptotagmin-8 (Fragment)
J3QR51	RAB31	Ras-related protein Rab-31
D6REY7	CAMK4	Calcium/calmodulin-dependent protein kinase type IV
A0A0A0MRE5	ASAP1	Arf-GAP with SH3 domain, ANK repeat and PH domain-containing protein 1 (Development and differentiation enhancing factor 1, isoform CRA_b)
C9JAM5	TBC1D23	TBC1 domain family member 23 (Fragment)
D6RI01	CDK7	Cyclin-dependent kinase 7
E9PPV1	FCMR	Fas apoptotic inhibitory molecule 3 (Fragment)
Q6IQ23	PLEKHA7	Pleckstrin homology domain-containing family A member 7 (PH domain-containing family A member 7)
B4DY08	HNRNPC	Heterogeneous nuclear ribonucleoproteins C1/C2 (cDNA FLJ53542, highly similar to Heterogeneous nuclear ribonucleoproteins C)
K7EKJ7	PTBP1	Polypyrimidine tract-binding protein 1 (Fragment)
F5H5M1	SHC4	SHC-transforming protein 4
G3V4F7	SRP54	Signal recognition particle 54 kDa protein
A2IDC9	NME4	Nucleoside diphosphate kinase, mitochondrial (Fragment)
I3L4J1		Uncharacterized protein (Fragment)
Q5JR05	RHOC	Rho-related GTP-binding protein RhoC
E9PJL7	CRYAB	Alpha-crystallin B chain (Fragment)
B4DIW9	ANKRD28	Serine/threonine-protein phosphatase 6 regulatory ankyrin repeat subunit A (cDNA FLJ54784, highly similar to Ankyrin repeat domain-containing protein 28)
C9J931	RHEB	GTP-binding protein Rheb
A0A0G2JIF2	HLA-A	HLA class I histocompatibility antigen, A-3 alpha chain
K7EML2	RBM42	RNA-binding protein 42
H0YAR2	PABPC1	Polyadenylate-binding protein 1 (Fragment)
D6RCM4	DDX4	Probable ATP-dependent RNA helicase DDX4 (Fragment)
Q96S86	HAPLN3	Hyaluronan and proteoglycan link protein 3
D6RIU0	HNRNPH1	Heterogeneous nuclear ribonucleoprotein H (Fragment)
P35236	PTPN7	Tyrosine-protein phosphatase non-receptor type 7 (EC 3.1.3.48) (Hematopoietic protein-tyrosine phosphatase) (HEPTP) (Protein-tyrosine phosphatase LC-PTP)
D6RAB4	SH3BP2	SH3 domain-binding protein 2 (Fragment)
Q13838	DDX39B	Spliceosome RNA helicase DDX39B (EC 3.6.4.13) (56 kDa U2AF65-associated protein) (ATP-dependent RNA helicase p47) (DEAD box protein UAP56) (HLA-B-associated transcript 1 protein)
Q14164	IKBKE	Inhibitor of nuclear factor kappa-B kinase subunit epsilon (I-kappa-B kinase epsilon) (IKK-E) (IKK-epsilon) (IkBKE) (EC 2.7.11.10) (Inducible I kappa-B kinase) (IKK-i)
F6Y5H0	RBMS1	RNA-binding motif, single-stranded-interacting protein 1
M0R1M2	CD22	B-cell receptor CD22 (Fragment)
Q6ZMQ8	AATK	Serine/threonine-protein kinase LMTK1 (EC 2.7.11.1) (Apoptosis-associated tyrosine kinase) (AATYK) (Brain apoptosis-associated tyrosine kinase) (CDK5-binding protein) (Lemur tyrosine kinase 1) (p35-binding protein) (p35BP)
Q6S545	POTEH	POTE ankyrin domain family member H (ANKRD26-like family C member 3) (Prostate, ovary, testis-expressed protein on chromosome 22) (POTE-22)
H7BZF6	BCS1L	Mitochondrial chaperone BCS1 (Fragment)
H7BXC7	PLEKHG2	Pleckstrin homology domain-containing family G member 2 (Fragment)
B1AK53	ESPN	Espin (Autosomal recessive deafness type 36 protein) (Ectoplasmic specialization protein)
P08243	ASNS	Asparagine synthetase [glutamine-hydrolyzing] (EC 6.3.5.4) (Cell cycle control protein TS11) (Glutamine-dependent asparagine synthetase)
U3KQV3		Uncharacterized protein (Fragment)
P35626	GRK3	Beta-adrenergic receptor kinase 2 (Beta-ARK-2) (EC 2.7.11.15) (G-protein-coupled receptor kinase 3)				¤n·_x0013_B¦†‘(_x0018_ΞlΫQY	™1βλb-_x001D_	q_x0008_Φ1ρ…
A0A087WSY4	IGHV4-30-2	Immunoglobulin heavy variable 4-30-2
A0A0J9YW62		Uncharacterized protein (Fragment)
A0A0D9SG17	PLCB1	Phosphoinositide phospholipase C (EC 3.1.4.11) (Fragment)
Q92499	DDX1	ATP-dependent RNA helicase DDX1 (EC 3.6.4.13) (DEAD box protein 1) (DEAD box protein retinoblastoma) (DBP-RB)
Q8IYJ3	SYTL1	Synaptotagmin-like protein 1 (Exophilin-7) (Protein JFC1)
Q9H2X6	HIPK2	Homeodomain-interacting protein kinase 2 (hHIPk2) (EC 2.7.11.1)
Q96BM9	ARL8A	ADP-ribosylation factor-like protein 8A (ADP-ribosylation factor-like protein 10B) (Novel small G protein indispensable for equal chromosome segregation 2)
A0A087WX67	TARDBP	TAR DNA-binding protein 43 (Fragment)
Q9UPN6	SCAF8	Protein SCAF8 (CDC5L complex-associated protein 7) (RNA-binding motif protein 16) (SR-related and CTD-associated factor 8)
Q5JX60	CPNE1	Copine-1 (Fragment)
A9Z1Z3	FER1L4	Fer-1-like protein 4
Q9NYS0	NKIRAS1	NF-kappa-B inhibitor-interacting Ras-like protein 1 (I-kappa-B-interacting Ras-like protein 1) (Kappa B-Ras protein 1) (KappaB-Ras1)
Q9UHD2	TBK1	Serine/threonine-protein kinase TBK1 (EC 2.7.11.1) (NF-kappa-B-activating kinase) (T2K) (TANK-binding kinase 1)
A0A0A0MT98	TAPBP	Tapasin
V9GY88	BCAN	Brevican core protein
F5H7L0	ANKRD49	Ankyrin repeat domain-containing protein 49 (Fragment)
A0A0A6YYK6	TRAV16	T cell receptor alpha variable 16
Q9HB21	PLEKHA1	Pleckstrin homology domain-containing family A member 1 (PH domain-containing family A member 1) (Tandem PH domain-containing protein 1) (TAPP-1)
Q5T760	SRSF11	Serine/arginine-rich-splicing factor 11 (Fragment)
F8VY01	FGD6	FYVE, RhoGEF and PH domain-containing protein 6
A0A1B0GUN8	CELF2	CUGBP Elav-like family member 2
O00746	NME4	Nucleoside diphosphate kinase, mitochondrial (NDK) (NDP kinase, mitochondrial) (EC 2.7.4.6) (Nucleoside diphosphate kinase D) (NDPKD) (nm23-H4)
O14966	RAB29	Ras-related protein Rab-7L1 (Rab-7-like protein 1) (Ras-related protein Rab-29)
Q9Y617	PSAT1	Phosphoserine aminotransferase (EC 2.6.1.52) (Phosphohydroxythreonine aminotransferase) (PSAT)
M0R283	AKT2	RAC-beta serine/threonine-protein kinase (Fragment)
Q7Z5R6	APBB1IP	Amyloid beta A4 precursor protein-binding family B member 1-interacting protein (APBB1-interacting protein 1) (Proline-rich EVH1 ligand 1) (PREL-1) (Proline-rich protein 73) (Rap1-GTP-interacting adapter molecule) (RIAM) (Retinoic acid-responsive proline-rich protein 1) (RARP-1)
A0A087WV61	RGS22	Regulator of G-protein-signaling 22
B7Z683	ABR	Active breakpoint cluster region-related protein (cDNA FLJ54747, highly similar to Active breakpoint cluster region-related protein)
Q8IV96	DDX6	DDX6 protein (Probable ATP-dependent RNA helicase DDX6)
Q8IVT5	KSR1	Kinase suppressor of Ras 1
O60674	JAK2	Tyrosine-protein kinase JAK2 (EC 2.7.10.2) (Janus kinase 2) (JAK-2)
A0A0C4DH42	IGHV3-66	Immunoglobulin heavy variable 3-66
B1AHC4	PRR5-ARHGAP8	PRR5-ARHGAP8 readthrough
M0QXV9		Uncharacterized protein (Fragment)
H3BPG5	RNPS1	RNA binding protein S1, serine-rich domain, isoform CRA_c (RNA-binding protein with serine-rich domain 1)
Q496F6	CD300E	CMRF35-like molecule 2 (CLM-2) (CD300 antigen-like family member E) (CMRF35-A5) (Immune receptor expressed on myeloid cells 2) (IREM-2) (Polymeric immunoglobulin receptor 2) (PIgR-2) (PIgR2) (Poly-Ig receptor 2) (CD antigen CD300e)
Q8NHH9	ATL2	Atlastin-2 (EC 3.6.5.-) (ADP-ribosylation factor-like protein 6-interacting protein 2) (ARL-6-interacting protein 2) (Aip-2)
A0A087WVF7	ITSN2	Intersectin-2
Q8IY37	DHX37	Probable ATP-dependent RNA helicase DHX37 (EC 3.6.4.13) (DEAH box protein 37)
B4E0Y9	STK26	Serine/threonine-protein kinase 26 (cDNA FLJ54528, highly similar to Serine/threonine-protein kinase MST4 (EC 2.7.11.1)) (cDNA, FLJ79036, highly similar to Serine/threonine-protein kinase MST4 (EC 2.7.11.1))
Q5JX54	CPNE1	Copine-1 (Fragment)
E9PJM7	SWAP70	Switch-associated protein 70 (Fragment)
P78371	CCT2	T-complex protein 1 subunit beta (TCP-1-beta) (CCT-beta)
E7ETC9	CAMK2B	Calcium/calmodulin-dependent protein kinase type II subunit beta (Fragment)
Q7L014	DDX46	Probable ATP-dependent RNA helicase DDX46 (EC 3.6.4.13) (DEAD box protein 46) (PRP5 homolog)
H0Y6Y1	DDX59	Probable ATP-dependent RNA helicase DDX59 (Fragment)
E9PH70	KIDINS220	Kinase D-interacting substrate of 220 kDa (Fragment)
K4DIA0	ICOSLG	ICOS ligand (Inducible T-cell co-stimulator ligand, isoform CRA_b)
[truncated: 4,554 more rows]

## Sheet: Cd_proteins
Entry	Gene names (primary )	Protein names
A0A0X1KG78	CAPS	Calcyphosin (Calcyphosine, isoform CRA_d)
Q5VTW1	ADAMTS4	A disintegrin and metalloproteinase with thrombospondin motifs 4
O75173	ADAMTS4	A disintegrin and metalloproteinase with thrombospondin motifs 4 (ADAM-TS 4) (ADAM-TS4) (ADAMTS-4) (EC 3.4.24.82) (ADMP-1) (Aggrecanase-1)
P04271	S100B	Protein S100-B (S-100 protein beta chain) (S-100 protein subunit beta) (S100 calcium-binding protein B)
A0A0U1RQI5	SORBS1	Sorbin and SH3 domain-containing protein 1 (Fragment)
Q09472	EP300	Histone acetyltransferase p300 (p300 HAT) (EC 2.3.1.48) (E1A-associated protein p300) (Histone butyryltransferase p300) (EC 2.3.1.-) (Histone crotonyltransferase p300) (EC 2.3.1.-) (Protein propionyltransferase p300) (EC 2.3.1.-)
C9JDH9	STK25	Serine/threonine-protein kinase 25 (Fragment)
P35442	THBS2	Thrombospondin-2
H0YFV4	ABCC9	ATP-binding cassette sub-family C member 9 (Fragment)
M0R0P9	AKT2	Non-specific serine/threonine protein kinase (EC 2.7.11.1)
E9PRY3	BRSK2	Serine/threonine-protein kinase BRSK2 (Fragment)
B7ZL91	MEP1A	Meprin A subunit (EC 3.4.24.-) (Endopeptidase-2)
J3QR68	HP	Haptoglobin (Fragment)
Q9ULD4	BRPF3	Bromodomain and PHD finger-containing protein 3
A0A088AWP7	GLIPR2	Golgi-associated plant pathogenesis-related protein 1
C9K088	MNX1	Motor neuron and pancreas homeobox protein 1 (Fragment)
A0A087X1V8	OVCH2	Ovochymase-2
D6REM7	FGFRL1	Fibroblast growth factor receptor-like 1 (Fragment)
P12814	ACTN1	Alpha-actinin-1 (Alpha-actinin cytoskeletal isoform) (F-actin cross-linking protein) (Non-muscle alpha-actinin-1)
Q02297	NRG1	Pro-neuregulin-1, membrane-bound isoform (Pro-NRG1) [Cleaved into: Neuregulin-1 (Acetylcholine receptor-inducing activity) (ARIA) (Breast cancer cell differentiation factor p45) (Glial growth factor) (Heregulin) (HRG) (Neu differentiation factor) (Sensory and motor neuron-derived factor)]
Q8IZJ3	CPAMD8	C3 and PZP-like alpha-2-macroglobulin domain-containing protein 8
Q86YB8	ERO1B	ERO1-like protein beta (ERO1-L-beta) (EC 1.8.4.-) (Endoplasmic reticulum oxidoreductase beta) (Endoplasmic reticulum oxidoreductin-1-like protein B) (Oxidoreductin-1-L-beta)
B7ZBI4	COL20A1	Collagen alpha-1(XX) chain (Fragment)
A0A0C4DH90	IGKV3OR2-268	Immunoglobulin kappa variable 3/OR2-268 (non-functional) (Fragment)
B4DXS3	ARMC3	Armadillo repeat-containing protein 3 (cDNA FLJ55433, highly similar to Homo sapiens armadillo repeat containing 3 (ARMC3), mRNA)
P08519	LPA	Apolipoprotein(a) (Apo(a)) (Lp(a)) (EC 3.4.21.-)
A0A140T9Y9	HLA-DPA1	HLA class II histocompatibility antigen, DP alpha 1 chain (Fragment)
A0A087WUP3	GTPBP8	GTP-binding protein 8
F5H0U3	TMPRSS5	Transmembrane protease serine 5
C9J4S8	FBXO24	F-box only protein 24 (Fragment)
O00391	QSOX1	Sulfhydryl oxidase 1 (hQSOX) (EC 1.8.3.2) (Quiescin Q6)
A6PVI2	PLG	Plasminogen (Fragment)
O75909	CCNK	Cyclin-K
P19525	EIF2AK2	Interferon-induced, double-stranded RNA-activated protein kinase (EC 2.7.11.1) (Eukaryotic translation initiation factor 2-alpha kinase 2) (eIF-2A protein kinase 2) (Interferon-inducible RNA-dependent protein kinase) (P1/eIF-2A protein kinase) (Protein kinase RNA-activated) (PKR) (Protein kinase R) (Tyrosine-protein kinase EIF2AK2) (EC 2.7.10.2) (p68 kinase)
Q8TB40	ABHD4	Protein ABHD4 (EC 3.-.-.-) (Alpha/beta hydrolase domain-containing protein 4) (Abhydrolase domain-containing protein 4) (Alpha/beta-hydrolase 4) (Lyso-N-acylphosphatidylethanolamine lipase)
H0Y897	ABI3BP	Target of Nesh-SH3 (Fragment)
F8VXI2	PTPRQ	Tyrosine-protein phosphatase (EC 3.1.3.48) (Fragment)
H7BXZ5	KALRN	Kalirin (Fragment)
F5H562	ATP7B	Copper-transporting ATPase 2
E7EW18	POLB	DNA polymerase beta (Fragment)
A8MXB9	SUMF2	Sulfatase-modifying factor 2
F6Q0Y6	MPP4	MAGUK p55 subfamily member 4
K7EPH1	WDR88	WD repeat-containing protein 88
P22459	KCNA4	Potassium voltage-gated channel subfamily A member 4 (HPCN2) (Voltage-gated K(+) channel HuKII) (Voltage-gated potassium channel HBK4) (Voltage-gated potassium channel HK1) (Voltage-gated potassium channel subunit Kv1.4)
J3QQS3	STRADA	STE20-related kinase adapter protein alpha
Q14155	ARHGEF7	Rho guanine nucleotide exchange factor 7 (Beta-Pix) (COOL-1) (PAK-interacting exchange factor beta) (p85)
P07942	LAMB1	Laminin subunit beta-1 (Laminin B1 chain) (Laminin-1 subunit beta) (Laminin-10 subunit beta) (Laminin-12 subunit beta) (Laminin-2 subunit beta) (Laminin-6 subunit beta) (Laminin-8 subunit beta)
C9JEQ8	GTPBP10	GTP-binding protein 10 (Fragment)
C9JR56	SATB2	DNA-binding protein SATB (Special AT-rich sequence-binding protein)
A0A075B6I3	IGLV11-55	Immunoglobulin lambda variable 11-55 (non-functional) (Fragment)
Q9NYQ7	CELSR3	Cadherin EGF LAG seven-pass G-type receptor 3 (Cadherin family member 11) (Epidermal growth factor-like protein 1) (EGF-like protein 1) (Flamingo homolog 1) (hFmi1) (Multiple epidermal growth factor-like domains protein 2) (Multiple EGF-like domains protein 2)
P07478	PRSS2	Trypsin-2 (EC 3.4.21.4) (Anionic trypsinogen) (Serine protease 2) (Trypsin II)
E7ENQ8	PGM2	Phosphoglucomutase-2
Q9H8H2	DDX31	Probable ATP-dependent RNA helicase DDX31 (EC 3.6.4.13) (DEAD box protein 31) (Helicain)
Q13520	AQP6	Aquaporin-6 (AQP-6) (Aquaporin-2-like) (Kidney-specific aquaporin) (hKID)
A0A0A0MTS7	TTN	Titin
M0QYY8	DAPK3	Death-associated protein kinase 3 (Fragment)
I3NI28	CTRL	Chymotrypsin-like protease CTRL-1 (Fragment)
B1AM27	UNC13B	Protein unc-13 homolog B
Q8NCW6	GALNT11	Polypeptide N-acetylgalactosaminyltransferase 11 (EC 2.4.1.41) (Polypeptide GalNAc transferase 11) (GalNAc-T11) (pp-GaNTase 11) (Protein-UDP acetylgalactosaminyltransferase 11) (UDP-GalNAc:polypeptide N-acetylgalactosaminyltransferase 11)
G3V195	EML3	Echinoderm microtubule associated protein like 3, isoform CRA_c (Echinoderm microtubule-associated protein-like 3)
Q8N568	DCLK2	Serine/threonine-protein kinase DCLK2 (EC 2.7.11.1) (CaMK-like CREB regulatory kinase 2) (CL2) (CLICK-II) (CLICK2) (Doublecortin domain-containing protein 3B) (Doublecortin-like and CAM kinase-like 2) (Doublecortin-like kinase 2)
F6WML8	BAG6	Large proline-rich protein BAG6 (Fragment)
A0A0B4J1Y8	IGLV9-49	Immunoglobulin lambda variable 9-49
A0A087WXK5	ABCA2	ATP-binding cassette sub-family A member 2
P15313	ATP6V1B1	V-type proton ATPase subunit B, kidney isoform (V-ATPase subunit B 1) (Endomembrane proton pump 58 kDa subunit) (Vacuolar proton pump subunit B 1)
E7ETN3		Uncharacterized protein
A0A0B4J1X2	CACNA1G	Voltage-dependent T-type calcium channel subunit alpha-1G
H0Y9I9	SKP2	S-phase kinase-associated protein 2 (Fragment)
Q5VV63	ATRNL1	Attractin-like protein 1
P04053	DNTT	DNA nucleotidylexotransferase (EC 2.7.7.31) (Terminal addition enzyme) (Terminal deoxynucleotidyltransferase) (Terminal transferase)
Q5T5M1	AQP7	Aquaporin-7
E5RFM2	CETN3	Centrin-3
A0A0D9SF20	PTBP1	Polypyrimidine tract binding protein 1, isoform CRA_e (Polypyrimidine tract-binding protein 1)
J3QS16	C19orf47	Uncharacterized protein C19orf47 (Fragment)
O75812	ERBB3	ErbB-3 R31 (Receptor tyrosine-protein kinase erbB-3) (Fragment)
Q6PK18	OGFOD3	2-oxoglutarate and iron-dependent oxygenase domain-containing protein 3 (EC 1.14.11.-)
P01116	KRAS	GTPase KRas (K-Ras 2) (Ki-Ras) (c-K-ras) (c-Ki-ras) [Cleaved into: GTPase KRas, N-terminally processed]
P62166	NCS1	Neuronal calcium sensor 1 (NCS-1) (Frequenin homolog) (Frequenin-like protein) (Frequenin-like ubiquitous protein)
P47902	CDX1	Homeobox protein CDX-1 (Caudal-type homeobox protein 1)
Q92793	CREBBP	CREB-binding protein (EC 2.3.1.48)
Q92843	BCL2L2	Bcl-2-like protein 2 (Bcl2-L-2) (Apoptosis regulator Bcl-W)
O94885	SASH1	SAM and SH3 domain-containing protein 1 (Proline-glutamate repeat-containing protein)
B4DVT3	INTS14	Integrator complex subunit 14 (cDNA FLJ50705)
P48052	CPA2	Carboxypeptidase A2 (EC 3.4.17.15)
H0Y887	UMODL1	Uromodulin-like 1 (Fragment)
P15882	CHN1	N-chimaerin (A-chimaerin) (Alpha-chimerin) (N-chimerin) (NC) (Rho GTPase-activating protein 2)
D6RHI0	CCNB1	G2/mitotic-specific cyclin-B1 (Fragment)
A0A1B0GU47	CDCP2	CUB domain-containing protein 2
Q08AM2	ADAM33	ADAM33 protein (Disintegrin and metalloproteinase domain-containing protein 33)
Q7KYR7	BTN2A1	Butyrophilin subfamily 2 member A1
Q76MJ5	ERN2	Serine/threonine-protein kinase/endoribonuclease IRE2 (Endoplasmic reticulum-to-nucleus signaling 2) (Inositol-requiring protein 2) (hIRE2p) (Ire1-beta) (IRE1b) [Includes: Serine/threonine-protein kinase (EC 2.7.11.1); Endoribonuclease (EC 3.1.26.-)]
A0A075B6H0	PTPRT	Receptor-type tyrosine-protein phosphatase T
Q8ND30	PPFIBP2	Liprin-beta-2 (Protein tyrosine phosphatase receptor type f polypeptide-interacting protein-binding protein 2) (PTPRF-interacting protein-binding protein 2)
H3BQ50	GABARAPL2	Gamma-aminobutyric acid receptor-associated protein-like 2
M0R117	RPL18A	60S ribosomal protein L18a
Q7M4L6	SHF	SH2 domain-containing adapter protein F
H0Y5H2	CABLES2	CDK5 and ABL1 enzyme substrate 2 (Fragment)
Q53RD9	FBLN7	Fibulin-7 (FIBL-7)
A8MZI4	RAB37	Ras-related protein Rab-37
F2Z2G3	BOLL	Protein boule-like
H0YAM7	RACK1	Receptor of-activated protein C kinase 1 (Fragment)
Q9Y4P3	TBL2	Transducin beta-like protein 2 (WS beta-transducin repeats protein) (WS-betaTRP) (Williams-Beuren syndrome chromosomal region 13 protein)
P04637	TP53	Cellular tumor antigen p53 (Antigen NY-CO-13) (Phosphoprotein p53) (Tumor suppressor p53)
A0A087WV22	RPL10	60S ribosomal protein L10
C9JZR2	CTNND1	Catenin delta-1
B7WPN9	ATP13A4	Cation-transporting ATPase (EC 3.6.3.-)
P56915	GSC	Homeobox protein goosecoid
F5H1A3	TBK1	Serine/threonine-protein kinase TBK1 (Fragment)
P22102	GART	Trifunctional purine biosynthetic protein adenosine-3 [Includes: Phosphoribosylamine--glycine ligase (EC 6.3.4.13) (Glycinamide ribonucleotide synthetase) (GARS) (Phosphoribosylglycinamide synthetase); Phosphoribosylformylglycinamidine cyclo-ligase (EC 6.3.3.1) (AIR synthase) (AIRS) (Phosphoribosyl-aminoimidazole synthetase); Phosphoribosylglycinamide formyltransferase (EC 2.1.2.2) (5'-phosphorib…
A4QPB2	LRP5L	Low-density lipoprotein receptor-related protein 5-like protein (LRP-5-like)
A0A087WSY9	TXNRD1	Thioredoxin reductase 1, cytoplasmic
Q9H981	ACTR8	Actin-related protein 8 (hArp8) (INO80 complex subunit N)
Q8IZJ1	UNC5B	Netrin receptor UNC5B (Protein unc-5 homolog 2) (Protein unc-5 homolog B) (p53-regulated receptor for death and life protein 1) (p53RDL1)
C9K0E3	PRKCD	Protein kinase C delta type (Fragment)
F5H265	UBC	Polyubiquitin-C (Fragment)
O75874	IDH1	Isocitrate dehydrogenase [NADP] cytoplasmic (IDH) (EC 1.1.1.42) (Cytosolic NADP-isocitrate dehydrogenase) (IDP) (NADP(+)-specific ICDH) (Oxalosuccinate decarboxylase)
A0A075B6J1	IGLV5-37	Immunoglobulin lambda variable 5-37
Q9NZ32	ACTR10	Actin-related protein 10 (Actin-related protein 11) (hARP11)
P84085	ARF5	ADP-ribosylation factor 5
P23142	FBLN1	Fibulin-1 (FIBL-1)
Q8N1V2	CFAP52	Cilia- and flagella-associated protein 52 (WD repeat-containing protein 16) (WD40-repeat protein up-regulated in HCC)
Q92529	SHC3	SHC-transforming protein 3 (Neuronal Shc) (N-Shc) (Protein Rai) (SHC-transforming protein C) (Src homology 2 domain-containing-transforming protein C3) (SH2 domain protein C3)
M0R116	ATP1A3	Sodium/potassium-transporting ATPase subunit alpha (EC 3.6.3.-)
A0A0A0MSJ9	RASA2	Ras GTPase-activating protein 2
F5H391	MFSD4A	Major facilitator superfamily domain-containing protein 4A
E9PJQ5	RAB30	Ras-related protein Rab-30 (Fragment)
P14222	PRF1	Perforin-1 (P1) (Cytolysin) (Lymphocyte pore-forming protein) (PFP)
E5RJB9	PABPC1	Polyadenylate-binding protein 1 (Fragment)
A0A087WSY5	CPB2	Carboxypeptidase B2
Q5SWX3	CAMK2G	Calcium/calmodulin-dependent protein kinase (CaM kinase) II gamma, isoform CRA_n (Calcium/calmodulin-dependent protein kinase type II subunit gamma)
A0A0D9SFE0	KCNQ2	Potassium voltage-gated channel subfamily KQT member 2 (Fragment)
A0A087WXZ5	ANTXRL	Anthrax toxin receptor-like
P05067	APP	Amyloid-beta A4 protein (ABPP) (APPI) (APP) (Alzheimer disease amyloid protein) (Amyloid precursor protein) (Amyloid-beta precursor protein) (Cerebral vascular amyloid peptide) (CVAP) (PreA4) (Protease nexin-II) (PN-II) [Cleaved into: N-APP; Soluble APP-alpha (S-APP-alpha); Soluble APP-beta (S-APP-beta); C99 (Beta-secretase C-terminal fragment) (Beta-CTF); Amyloid-beta protein 42 (Abeta42) (Beta-…
Q7Z5A4	PRSS42	Serine protease 42 (EC 3.4.21.-) (Testis serine protease 2)
Q08881	ITK	Tyrosine-protein kinase ITK/TSK (EC 2.7.10.2) (Interleukin-2-inducible T-cell kinase) (IL-2-inducible T-cell kinase) (Kinase EMT) (T-cell-specific kinase) (Tyrosine-protein kinase Lyk)
G3V124	TMPRSS4	Transmembrane protease serine 4 (Transmembrane protease, serine 4, isoform CRA_c)
E9PIT3	F2	Prothrombin
Q92826	HOXB13	Homeobox protein Hox-B13
Q9H3Y0	R3HDML	Peptidase inhibitor R3HDML (Cysteine-rich secretory protein R3HDML)
A0A087WTS0	GPX2	Glutathione peroxidase
E9PNJ4	STIM1	Stromal interaction molecule 1
B5MC98	PREB	Prolactin regulatory element-binding protein
A6NJD9	MRPL23	39S ribosomal protein L23, mitochondrial
E9PNH7	CRYAB	Alpha-crystallin B chain (Fragment)
P20908	COL5A1	Collagen alpha-1(V) chain
E5RJF8	CETN3	Centrin-3
P10911	MCF2	Proto-oncogene DBL (Proto-oncogene MCF-2) [Cleaved into: MCF2-transforming protein; DBL-transforming protein]
J3QQX3	FDXR	NADPH:adrenodoxin oxidoreductase, mitochondrial (EC 1.18.1.6)
Q96GL6	SLC18A1	Chromaffin granule amine transporter (SLC18A1 protein)
A0A0B4J279	TRAV21	T cell receptor alpha variable 21
B7ZM87	SRGAP2	SLIT-ROBO Rho GTPase-activating protein 2 (SRGAP2 protein)
P58304	VSX2	Visual system homeobox 2 (Ceh-10 homeodomain-containing homolog) (Homeobox protein CHX10)
F8WDX3	RBM14	RNA-binding protein 14
H7C3R4	WDR62	WD repeat-containing protein 62 (Fragment)
K7ELH5	LRRC7	Leucine-rich repeat-containing protein 7 (Fragment)
G3V5X7	TEP1	Telomerase protein component 1
Q16281	CNGA3	Cyclic nucleotide-gated cation channel alpha-3 (Cone photoreceptor cGMP-gated channel subunit alpha) (Cyclic nucleotide-gated channel alpha-3) (CNG channel alpha-3) (CNG-3) (CNG3)
A0A0A0MSE1	ERBB4	Receptor protein-tyrosine kinase (EC 2.7.10.1)
Q6ZNL6	FGD5	FYVE, RhoGEF and PH domain-containing protein 5 (Zinc finger FYVE domain-containing protein 23)
Q92729	PTPRU	Receptor-type tyrosine-protein phosphatase U (R-PTP-U) (EC 3.1.3.48) (Pancreatic carcinoma phosphatase 2) (PCP-2) (Protein-tyrosine phosphatase J) (PTP-J) (hPTP-J) (Protein-tyrosine phosphatase pi) (PTP pi) (Protein-tyrosine phosphatase receptor omicron) (PTP-RO) (Receptor-type protein-tyrosine phosphatase psi) (R-PTP-psi)
Q9UHB4	NDOR1	NADPH-dependent diflavin oxidoreductase 1 (EC 1.18.1.-) (NADPH-dependent FMN and FAD-containing oxidoreductase) (Novel reductase 1)
S4R381	FGFR2	Fibroblast growth factor receptor 2
P02743	APCS	Serum amyloid P-component (SAP) (9.5S alpha-1-glycoprotein) [Cleaved into: Serum amyloid P-component(1-203)]
S4R334	TP53	Cellular tumor antigen p53 (Fragment)
Q5VVV9	SLC2A8	Solute carrier family 2, (Facilitated glucose transporter) member 8, isoform CRA_b (Solute carrier family 2, facilitated glucose transporter member 8)
Q6NVV9	ADAM5	Putative disintegrin and metalloproteinase domain-containing protein 5 (Putative transmembrane metalloproteinase-like, disintegrin-like, and cysteine-rich protein II) (tMDC II)
Q7Z3Z4	PIWIL4	Piwi-like protein 4
D6RF75	GFM2	Ribosome-releasing factor 2, mitochondrial (Fragment)
Q8TE60	ADAMTS18	A disintegrin and metalloproteinase with thrombospondin motifs 18 (ADAM-TS 18) (ADAM-TS18) (ADAMTS-18) (EC 3.4.24.-)
Q13418	ILK	Integrin-linked protein kinase (EC 2.7.11.1) (59 kDa serine/threonine-protein kinase) (ILK-1) (ILK-2) (p59ILK)
P06756	ITGAV	Integrin alpha-V (Vitronectin receptor) (Vitronectin receptor subunit alpha) (CD antigen CD51) [Cleaved into: Integrin alpha-V heavy chain; Integrin alpha-V light chain]
O95067	CCNB2	G2/mitotic-specific cyclin-B2
A0A087WXW9	COL5A1	Collagen alpha-1(V) chain
E9PKA3	EFEMP2	EGF-containing fibulin-like extracellular matrix protein 2 (Fragment)
M0R0F9	TRIP10	Cdc42-interacting protein 4
P48167	GLRB	Glycine receptor subunit beta (Glycine receptor 58 kDa subunit)
M0QZQ3	SPTBN4	Spectrin beta chain
A0A0C4DFS5	TDRD9	ATP-dependent RNA helicase TDRD9
H0YEW1	LRRK1	Leucine-rich repeat serine/threonine-protein kinase 1 (Fragment)
H0Y5A9	HSPG2	Basement membrane-specific heparan sulfate proteoglycan core protein (Fragment)
F5H4Z1	PTPN6	Tyrosine-protein phosphatase non-receptor type 6
E9PKP7	UBTF	Nucleolar transcription factor 1
Q6UXG3	CD300LG	CMRF35-like molecule 9 (CLM-9) (CD300 antigen-like family member G) (Triggering receptor expressed on myeloid cells 4) (TREM-4) (CD antigen CD300g)
H0Y3C5	HCK	Tyrosine-protein kinase (EC 2.7.10.2)
Q9BV38	WDR18	WD repeat-containing protein 18
P05156	CFI	Complement factor I (EC 3.4.21.45) (C3B/C4B inactivator) [Cleaved into: Complement factor I heavy chain; Complement factor I light chain]
A6NGE4	DCAF8L1	DDB1- and CUL4-associated factor 8-like protein 1 (WD repeat-containing protein 42B)
E9PP76	CCS	Copper chaperone for superoxide dismutase (Fragment)
O60307	MAST3	Microtubule-associated serine/threonine-protein kinase 3 (EC 2.7.11.1)
H0YBM4	ASAP1	Arf-GAP with SH3 domain, ANK repeat and PH domain-containing protein 1 (Fragment)
Q29983	MICA	MHC class I polypeptide-related sequence A (MIC-A)
H0YAT9	FGF20	Fibroblast growth factor 20 (Fragment)
P62820	RAB1A	Ras-related protein Rab-1A (YPT1-related protein)
K7EMA7	RPL23A	60S ribosomal protein L23a
O75509	TNFRSF21	Tumor necrosis factor receptor superfamily member 21 (Death receptor 6) (CD antigen CD358)
Q9Y243	AKT3	RAC-gamma serine/threonine-protein kinase (EC 2.7.11.1) (Protein kinase Akt-3) (Protein kinase B gamma) (PKB gamma) (RAC-PK-gamma) (STK-2)
C9J580	ACTR3C	Actin-related protein 3C (Fragment)
H0YIP2	PRIM1	DNA primase small subunit (Fragment)
A2A437	PTPRF	Receptor-type tyrosine-protein phosphatase F (Fragment)
Q4VXW1	COL9A3	Collagen alpha-3(IX) chain (Fragment)
J3QRV9	ERAL1	GTPase Era, mitochondrial (Fragment)
S4R3E5	KPNA6	Importin subunit alpha-7
F5H0T8	ZAN	Zonadhesin
O75676	RPS6KA4	Ribosomal protein S6 kinase alpha-4 (S6K-alpha-4) (EC 2.7.11.1) (90 kDa ribosomal protein S6 kinase 4) (Nuclear mitogen- and stress-activated protein kinase 2) (Ribosomal protein kinase B) (RSKB)
E9PF84	IDH3G	Isocitrate dehydrogenase [NAD] subunit, mitochondrial (Fragment)
B6VEX4	ABI1	Abl interactor 1 (Abl-interactor 1 variant 21)
Q15771	RAB30	Ras-related protein Rab-30
F8W0Q1	ACTR6	Actin-related protein 6
H0Y8A5	WDR49	WD repeat-containing protein 49 (Fragment)
H0YE86	CSF3R	Granulocyte colony-stimulating factor receptor (Fragment)
G3V3J3	OTX2	Homeobox protein OTX2 (Fragment)
P98196	ATP11A	Probable phospholipid-transporting ATPase IH (EC 3.6.3.1) (ATPase IS) (ATPase class VI type 11A) (P4-ATPase flippase complex alpha subunit ATP11A)
O00300	TNFRSF11B	Tumor necrosis factor receptor superfamily member 11B (Osteoclastogenesis inhibitory factor) (Osteoprotegerin)
A0A087WV75	NCAM1	Neural cell adhesion molecule 1
Q92879	CELF1	CUGBP Elav-like family member 1 (CELF-1) (50 kDa nuclear polyadenylated RNA-binding protein) (Bruno-like protein 2) (CUG triplet repeat RNA-binding protein 1) (CUG-BP1) (CUG-BP- and ETR-3-like factor 1) (Deadenylation factor CUG-BP) (Embryo deadenylation element-binding protein homolog) (EDEN-BP homolog) (RNA-binding protein BRUNOL-2)
D6R9U1	PITX1	Pituitary homeobox 1 (Fragment)
A4D1T9	PRSS37	Probable inactive serine protease 37 (Probable inactive trypsin-X2)
Q6ZWK6	TMPRSS11F	Transmembrane protease serine 11F (EC 3.4.21.-) (Airway trypsin-like protease 4)
B1AJR6	PTPRT	Receptor-type tyrosine-protein phosphatase T
H0YDH6	COL21A1	Collagen alpha-1(XXI) chain (Fragment)
H0Y6T8	RAB18	Ras-related protein Rab-18 (Fragment)
Q96E39	RBMXL1	RNA binding motif protein, X-linked-like-1 (Heterogeneous nuclear ribonucleoprotein G-like 1)
P36888	FLT3	Receptor-type tyrosine-protein kinase FLT3 (EC 2.7.10.1) (FL cytokine receptor) (Fetal liver kinase-2) (FLK-2) (Fms-like tyrosine kinase 3) (FLT-3) (Stem cell tyrosine kinase 1) (STK-1) (CD antigen CD135)
Q5VT25	CDC42BPA	Serine/threonine-protein kinase MRCK alpha (EC 2.7.11.1) (CDC42-binding protein kinase alpha) (DMPK-like alpha) (Myotonic dystrophy kinase-related CDC42-binding kinase alpha) (MRCK alpha) (Myotonic dystrophy protein kinase-like alpha)
P52294	KPNA1	Importin subunit alpha-5 (Karyopherin subunit alpha-1) (Nucleoprotein interactor 1) (NPI-1) (RAG cohort protein 2) (SRP1-beta) [Cleaved into: Importin subunit alpha-5, N-terminally processed]
C9JR00	PRKAR1B	cAMP-dependent protein kinase type I-beta regulatory subunit (Fragment)
P09104	ENO2	Gamma-enolase (EC 4.2.1.11) (2-phospho-D-glycerate hydro-lyase) (Enolase 2) (Neural enolase) (Neuron-specific enolase) (NSE)
J3KSZ0	EIF4A1	Eukaryotic initiation factor 4A-I (Fragment)
C9JS80	HGF	Hepatocyte growth factor (Fragment)
P01742	IGHV1-69	Immunoglobulin heavy variable 1-69 (Ig heavy chain V-I region EU) (Ig heavy chain V-I region SIE) (Ig heavy chain V-I region WOL)
D7R525	MAPK9	Mitogen-activated protein kinase (EC 2.7.11.24)
H0YCD9	CTTN	Src substrate cortactin (Fragment)
A8MWD9	SNRPGP15	Putative small nuclear ribonucleoprotein G-like protein 15
A0A0A0MSM3	UTRN	Utrophin (Fragment)
A0A1B0GTW2	CACNA1A	Voltage-dependent P/Q-type calcium channel subunit alpha
Q9UN19	DAPP1	Dual adapter for phosphotyrosine and 3-phosphotyrosine and 3-phosphoinositide (hDAPP1) (B lymphocyte adapter protein Bam32) (B-cell adapter molecule of 32 kDa)
E5RGZ4	ENO3	Beta-enolase (Fragment)
Q5T8A5	OBP2A	Odorant-binding protein 2a
C9J795	NECTIN3	Nectin-3 (Fragment)
Q6UW01	CBLN3	Cerebellin-3
A0A0J9YVV7	MYOM2	Myomesin-2
A0A0C4DGS8	HNF1B	Hepatocyte nuclear factor 1-beta
P49674	CSNK1E	Casein kinase I isoform epsilon (CKI-epsilon) (CKIe) (EC 2.7.11.1)
Q9GZL7	WDR12	Ribosome biogenesis protein WDR12 (WD repeat-containing protein 12)
Q14721	KCNB1	Potassium voltage-gated channel subfamily B member 1 (Delayed rectifier potassium channel 1) (DRK1) (h-DRK1) (Voltage-gated potassium channel subunit Kv2.1)
C9JZN1	GNB2	Guanine nucleotide-binding protein G(I)/G(S)/G(T) subunit beta-2 (Fragment)
F8W0P7	ATP5F1B	ATP synthase subunit beta, mitochondrial (Fragment)
Q8NDT2	RBM15B	Putative RNA-binding protein 15B (One-twenty two protein 3) (HuOTT3) (RNA-binding motif protein 15B)
K7EN94	TARDBP	TAR DNA-binding protein 43 (Fragment)
E9PF82	CAMK2D	Calcium/calmodulin-dependent protein kinase type II subunit delta
P21754	ZP3	Zona pellucida sperm-binding protein 3 (Sperm receptor) (ZP3A/ZP3B) (Zona pellucida glycoprotein 3) (Zp-3) (Zona pellucida protein C) [Cleaved into: Processed zona pellucida sperm-binding protein 3]
Q9NZM3	ITSN2	Intersectin-2 (SH3 domain-containing protein 1B) (SH3P18) (SH3P18-like WASP-associated protein)
M0R1X8	SLC25A23	Calcium-binding mitochondrial carrier protein SCaMC-3 (Fragment)
Q9BYP7	WNK3	Serine/threonine-protein kinase WNK3 (EC 2.7.11.1) (Protein kinase lysine-deficient 3) (Protein kinase with no lysine 3)
K7EQ37	UNC13D	Protein unc-13 homolog D (Fragment)
Q07011	TNFRSF9	Tumor necrosis factor receptor superfamily member 9 (4-1BB ligand receptor) (CDw137) (T-cell antigen 4-1BB homolog) (T-cell antigen ILA) (CD antigen CD137)
C9JMW6	ABHD14A	Protein ABHD14A (Fragment)
Q9YNA8	ERVK-19	Endogenous retrovirus group K member 19 Gag polyprotein (HERV-K(C19) Gag protein) (HERV-K_19q11 provirus ancestral Gag polyprotein) (Gag polyprotein)
E9PBE8	CAMK2B	Calcium/calmodulin-dependent protein kinase type II subunit beta (Fragment)
O14514	ADGRB1	Adhesion G protein-coupled receptor B1 (Brain-specific angiogenesis inhibitor 1) [Cleaved into: Vasculostatin-40 (Vstat40); Vasculostatin-120 (Vstat120)]
E9PP67	TOLLIP	Toll-interacting protein
J3QQQ9		Uncharacterized protein
E9PHX8	MERTK	Tyrosine-protein kinase Mer
H7BXM4	COL4A3	Collagen alpha-3(IV) chain (Fragment)
Q9QC07	ERVK-18	Endogenous retrovirus group K member 18 Pol protein (HERV-K(C1a) Pol protein) (HERV-K110 Pol protein) (HERV-K18 Pol protein) (HERV-K_1q23.3 provirus ancestral Pol protein) [Includes: Reverse transcriptase (EC 2.7.7.49); Ribonuclease H (RNase H) (EC 3.1.26.4)]
D6RD67	MCCC2	Methylcrotonoyl-CoA carboxylase beta chain, mitochondrial (Fragment)
R4GN15	ARHGAP9	Rho GTPase-activating protein 9
G3V1V7	MYBPC1	Myosin binding protein C, slow type, isoform CRA_e (Myosin-binding protein C, slow-type)
E9PMV2	HLA-DQA1	HLA class II histocompatibility antigen, DQ alpha 1 chain (Fragment)
P20340	RAB6A	Ras-related protein Rab-6A (Rab-6)
F5H5G1	LSAMP	Limbic system-associated membrane protein
E9PLY0	MACF1	Microtubule-actin cross-linking factor 1, isoforms 1/2/3/5
D6R9K8	ADH4	Alcohol dehydrogenase 4 (Fragment)
O75445	USH2A	Usherin (Usher syndrome type IIa protein) (Usher syndrome type-2A protein)
V9GY63	PLCG1	Phosphoinositide phospholipase C (EC 3.1.4.11) (Fragment)
F5H7S7	IQGAP2	Ras GTPase-activating-like protein IQGAP2
A0A0A0MSS9	DAZ4	Deleted in azoospermia protein 4
A0A087WUI7	DSCAM	Down syndrome cell adhesion molecule
Q9H361	PABPC3	Polyadenylate-binding protein 3 (PABP-3) (Poly(A)-binding protein 3) (Testis-specific poly(A)-binding protein)
J3QQT5	SGK494	Uncharacterized serine/threonine-protein kinase SgK494 (Fragment)
E5RJS4	CRISPLD1	Cysteine-rich secretory protein LCCL domain-containing 1 (Fragment)
O95170	CDRT1	CMT1A duplicated region transcript 1 protein
A0A0D9SGJ7	KCNQ2	Potassium voltage-gated channel subfamily KQT member 2 (Fragment)
Q96RW7	HMCN1	Hemicentin-1 (Fibulin-6) (FIBL-6)
P30483	HLA-B	HLA class I histocompatibility antigen, B-45 alpha chain (Bw-45) (MHC class I antigen B*45)
E9PNJ5	LRP4	Low-density lipoprotein receptor-related protein 4 (Fragment)
Q07954	LRP1	Prolow-density lipoprotein receptor-related protein 1 (LRP-1) (Alpha-2-macroglobulin receptor) (A2MR) (Apolipoprotein E receptor) (APOER) (CD antigen CD91) [Cleaved into: Low-density lipoprotein receptor-related protein 1 85 kDa subunit (LRP-85); Low-density lipoprotein receptor-related protein 1 515 kDa subunit (LRP-515); Low-density lipoprotein receptor-related protein 1 intracellular domain (L…
P14859	POU2F1	POU domain, class 2, transcription factor 1 (NF-A1) (Octamer-binding protein 1) (Oct-1) (Octamer-binding transcription factor 1) (OTF-1)
Q13393	PLD1	Phospholipase D1 (PLD 1) (hPLD1) (EC 3.1.4.4) (Choline phosphatase 1) (Phosphatidylcholine-hydrolyzing phospholipase D1)
P25940	COL5A3	Collagen alpha-3(V) chain
F8VYN5	HNRNPA1	Heterogeneous nuclear ribonucleoprotein A1 (Fragment)
Q5JX59	CPNE1	Copine-1 (Fragment)
C9JEC5	PNCK	Calcium/calmodulin-dependent protein kinase type 1B (Fragment)
P43403	ZAP70	Tyrosine-protein kinase ZAP-70 (EC 2.7.10.2) (70 kDa zeta-chain associated protein) (Syk-related tyrosine kinase)
A0A140T933	HLA-A	HLA class I histocompatibility antigen, A-3 alpha chain (Fragment)
H0YE91	CHI3L2	Chitinase-3-like protein 2 (Fragment)
D6RBM0	HNRNPH1	Heterogeneous nuclear ribonucleoprotein H (Fragment)
C9JCM6	MEST	Mesoderm-specific transcript homolog protein (Fragment)
Q8IVM8	SLC22A9	Solute carrier family 22 member 9 (Organic anion transporter 7)
P21860	ERBB3	Receptor tyrosine-protein kinase erbB-3 (EC 2.7.10.1) (Proto-oncogene-like protein c-ErbB-3) (Tyrosine kinase-type cell surface receptor HER3)
F8VVT9	AGAP2	Arf-GAP with GTPase, ANK repeat and PH domain-containing protein 2
P62917	RPL8	60S ribosomal protein L8 (Large ribosomal subunit protein uL2)
Q12837	POU4F2	POU domain, class 4, transcription factor 2 (Brain-specific homeobox/POU domain protein 3B) (Brain-3B) (Brn-3B)
A0A0A0MTB8	WDR36	WD repeat-containing protein 36
Q86T26	TMPRSS11B	Transmembrane protease serine 11B (EC 3.4.21.-) (Airway trypsin-like protease 5)
E9PC90	CCNB1	G2/mitotic-specific cyclin-B1 (Fragment)
B4DHQ6	SRI	Sorcin (cDNA FLJ54267, moderately similar to Sorcin)
P08567	PLEK	Pleckstrin (Platelet 47 kDa protein) (p47)
P0DJD3	RBMY1A1	RNA-binding motif protein, Y chromosome, family 1 member A1 (RNA-binding motif protein 1) (RNA-binding motif protein 2) (Y chromosome RNA recognition motif 1) (hRBMY)
K7EQZ7	FLII	Protein flightless-1 homolog (Fragment)
Q08257	CRYZ	Quinone oxidoreductase (EC 1.6.5.5) (NADPH:quinone reductase) (Zeta-crystallin)
I3L0X1	ALDH3A2	Fatty aldehyde dehydrogenase
Q5RGS4	PLEKHA1	Pleckstrin homology domain-containing family A member 1
Q9P121	NTM	Neurotrimin (hNT) (IgLON family member 2)
H0Y3M3	EML3	Echinoderm microtubule-associated protein-like 3 (Fragment)
Q96PT4	DUX3	Putative double homeobox protein 3
O96019	ACTL6A	Actin-like protein 6A (53 kDa BRG1-associated factor A) (Actin-related protein Baf53a) (ArpNbeta) (BRG1-associated factor 53A) (BAF53A) (INO80 complex subunit K)
A0A140TA42	GABBR1	Gamma-aminobutyric acid type B receptor subunit 1
H0YIV0	HSP90B1	Endoplasmin (Fragment)
P16109	SELP	P-selectin (CD62 antigen-like family member P) (Granule membrane protein 140) (GMP-140) (Leukocyte-endothelial cell adhesion molecule 3) (LECAM3) (Platelet activation dependent granule-external membrane protein) (PADGEM) (CD antigen CD62P)
A0A140T9M1	MICA	MHC class I polypeptide-related sequence A
Q9UMQ3	BARX2	Homeobox protein BarH-like 2
E9PGT3	RPS6KA1	Ribosomal protein S6 kinase (EC 2.7.11.1)
A6NK97	SLC22A20P	Solute carrier family 22 member 20 (Organic anion transporter 6) (Solute carrier family 22 member 20 pseudogene)
A0A1B0GUM7	CACNA1A	Voltage-dependent P/Q-type calcium channel subunit alpha-1A (Fragment)
Q969Q4	ARL11	ADP-ribosylation factor-like protein 11 (ADP-ribosylation factor-like tumor suppressor protein 1)
P58335	ANTXR2	Anthrax toxin receptor 2 (Capillary morphogenesis gene 2 protein) (CMG-2)
P0DP23	CALM1	Calmodulin-1
P0DP24	CALM2	Calmodulin-2
P0DP25	CALM3	Calmodulin-3
Q96PF2	TSSK2	Testis-specific serine/threonine-protein kinase 2 (TSK-2) (TSK2) (TSSK-2) (Testis-specific kinase 2) (EC 2.7.11.1) (DiGeorge syndrome protein G) (DGS-G) (Serine/threonine-protein kinase 22B)
P17252	PRKCA	Protein kinase C alpha type (PKC-A) (PKC-alpha) (EC 2.7.11.13)
D3YTB5	IRAK1	Interleukin-1 receptor-associated kinase 1
P0CG30	GSTT2B	Glutathione S-transferase theta-2B (EC 2.5.1.18) (GST class-theta-2) (Glutathione S-transferase theta-2)
P11464	PSG1	Pregnancy-specific beta-1-glycoprotein 1 (PS-beta-G-1) (PSBG-1) (Pregnancy-specific glycoprotein 1) (CD66 antigen-like family member F) (Fetal liver non-specific cross-reactive antigen 1/2) (FL-NCA-1/2) (PSG95) (Pregnancy-specific beta-1 glycoprotein C/D) (PS-beta-C/D) (CD antigen CD66f)
Q01082	SPTBN1	Spectrin beta chain, non-erythrocytic 1 (Beta-II spectrin) (Fodrin beta chain) (Spectrin, non-erythroid beta chain 1)
Q9BVQ7	SPATA5L1	Spermatogenesis-associated protein 5-like protein 1
O15522	NKX2-8	Homeobox protein Nkx-2.8 (Homeobox protein NK-2 homolog H)
Q7Z4S9	SH2D6	SH2 domain-containing protein 6
P20273	CD22	B-cell receptor CD22 (B-lymphocyte cell adhesion molecule) (BL-CAM) (Sialic acid-binding Ig-like lectin 2) (Siglec-2) (T-cell surface antigen Leu-14) (CD antigen CD22)
A0A087WYW1	SAMD11	Sterile alpha motif domain-containing protein 11
P35232	PHB	Prohibitin
U3NG26	BTK	Tyrosine-protein kinase (EC 2.7.10.2)
E7ESP4	ITGA2	Integrin alpha-2
H7C2W9	RPL31	60S ribosomal protein L31 (Fragment)
Q14498	RBM39	RNA-binding protein 39 (CAPER alpha) (Hepatocellular carcinoma protein 1) (RNA-binding motif protein 39) (RNA-binding region-containing protein 2) (Splicing factor HCC1)
A0A0A0MS56	ADH6	Alcohol dehydrogenase 6
Q29865	HLA-C	HLA class I histocompatibility antigen, Cw-18 alpha chain (MHC class I antigen Cw*18)
H0Y860	STIM2	Stromal interaction molecule 2
Q5JQP2	POLL	DNA polymerase lambda (Fragment)
Q9NRH2	SNRK	SNF-related serine/threonine-protein kinase (EC 2.7.11.1) (SNF1-related kinase)
H3BQZ6	SYT17	Synaptotagmin-17
G3XAP6	COMP	Cartilage oligomeric matrix protein (Cartilage oligomeric matrix protein, isoform CRA_b)
F5H7V9	TNC	Tenascin
Q9BQI3	EIF2AK1	Eukaryotic translation initiation factor 2-alpha kinase 1 (EC 2.7.11.1) (Heme-controlled repressor) (HCR) (Heme-regulated eukaryotic initiation factor eIF-2-alpha kinase) (Heme-regulated inhibitor) (Hemin-sensitive initiation factor 2-alpha kinase)
P98088	MUC5AC	Mucin-5AC (MUC-5AC) (Gastric mucin) (Lewis B blood group antigen) (LeB) (Major airway glycoprotein) (Mucin-5 subtype AC, tracheobronchial) (Tracheobronchial mucin) (TBM)
Q9BRX9	WDR83	WD repeat domain-containing protein 83 (Mitogen-activated protein kinase organizer 1) (MAPK organizer 1)
Q9Y6T7	DGKB	Diacylglycerol kinase beta (DAG kinase beta) (EC 2.7.1.107) (90 kDa diacylglycerol kinase) (Diglyceride kinase beta) (DGK-beta)
A0A087X1L4	MAGIX	PDZ domain-containing protein MAGIX
D6RAU3	MAPK10	Mitogen-activated protein kinase 10 (Fragment)
Q8TF62	ATP8B4	Probable phospholipid-transporting ATPase IM (EC 3.6.3.1) (ATPase class I type 8B member 4) (P4-ATPase flippase complex alpha subunit ATP8B4)
P24310	COX7A1	Cytochrome c oxidase subunit 7A1, mitochondrial (Cytochrome c oxidase subunit VIIa-heart) (Cytochrome c oxidase subunit VIIa-H) (Cytochrome c oxidase subunit VIIa-muscle) (Cytochrome c oxidase subunit VIIa-M)
H7C218	CPVL	Probable serine carboxypeptidase CPVL (Fragment)
D6RBT6	COPB2	Coatomer subunit beta' (Fragment)
F8WEW2	ACTR3	Actin-related protein 3
Q9UHX3	ADGRE2	Adhesion G protein-coupled receptor E2 (EGF-like module receptor 2) (EGF-like module-containing mucin-like hormone receptor-like 2) (CD antigen CD312)
E9PI30	CTSW	Cathepsin W
Q3ZCN5	OTOGL	Otogelin-like protein
A0A087WYV9	SYNJ2BP-COX16	SYNJ2BP-COX16 readthrough
A0A140TA49	C4A	Complement C4-A
H3BNP6	ADAD2	Adenosine deaminase domain-containing protein 2 (Fragment)
O75578	ITGA10	Integrin alpha-10
A0A0J9YXZ5	IQGAP1	Ras GTPase-activating-like protein IQGAP1
F5GYK2	STRN4	Striatin-4
Q6ZN44	UNC5A	Netrin receptor UNC5A (Protein unc-5 homolog 1) (Protein unc-5 homolog A)
F8VWS0	RPLP0	60S acidic ribosomal protein P0
G3V5V0	NEK9	Serine/threonine-protein kinase Nek9 (Fragment)
O95096	NKX2-2	Homeobox protein Nkx-2.2 (Homeobox protein NK-2 homolog B)
A0A0B4J2E0	TRBV12-4	T cell receptor beta variable 12-4
Q9NRR2	TPSG1	Tryptase gamma (EC 3.4.21.-) (Serine protease 31) (Transmembrane tryptase) [Cleaved into: Tryptase gamma light chain; Tryptase gamma heavy chain]
A0A087X2C3	RAP2C	RAP2C, member of RAS oncogene family, isoform CRA_b (Ras-related protein Rap-2c)
Q15506	SPA17	Sperm surface protein Sp17 (Cancer/testis antigen 22) (CT22) (Sp17-1) (Sperm autoantigenic protein 17) (Sperm protein 17)
A0A087X0K3	GPX6	Glutathione peroxidase
P20336	RAB3A	Ras-related protein Rab-3A
F5H7J9	LRP6	Low-density lipoprotein receptor-related protein
A0A1B0GUM5	TPCN2	Two pore calcium channel protein 2
A0A088AWN2	WDR20	WD repeat-containing protein 20
C9J4V0	RAB7A	Ras-related protein Rab-7a
Q86YS7	C2CD5	C2 domain-containing protein 5 (C2 domain-containing phosphoprotein of 138 kDa)
A0A087WUC4	ADH1C	Alcohol dehydrogenase 1C (Fragment)
A0A0J9YWE8	YWHAB	14-3-3 protein beta/alpha
H0YNQ3	ALDH1A3	Aldehyde dehydrogenase family 1 member A3
Q8N7R7	CCNYL1	Cyclin-Y-like protein 1
Q8TCS8	PNPT1	Polyribonucleotide nucleotidyltransferase 1, mitochondrial (EC 2.7.7.8) (3'-5' RNA exonuclease OLD35) (PNPase old-35) (Polynucleotide phosphorylase 1) (PNPase 1) (Polynucleotide phosphorylase-like protein)
F8W810		Putative eukaryotic translation initiation factor 2 subunit 3-like protein
B5MCI0	SMTN	Smoothelin
E7EQV3	PABPC1	Polyadenylate-binding protein (PABP)
Q96L35	EPHB4	EPH receptor B4, isoform CRA_b (Ephrin type-B receptor 4) (Receptor protein tyrosine kinase variant EphB4v1)
A0A5A6	TRBV11-3	T cell receptor beta variable 11-3
A0A0G2JS65	MUC4	Mucin-4
Q8WY19	DSCAM	Down syndrome cell adhesion molecule (Down syndrome cell adhesion molecule splice variant) (Fragment)
Q96Q07	BTBD9	BTB/POZ domain-containing protein 9
A0A087WZQ5	MERTK	Tyrosine-protein kinase Mer
F5H7D6	TLE3	Transducin-like enhancer protein 3
P01891	HLA-A	HLA class I histocompatibility antigen, A-68 alpha chain (Aw-68) (HLA class I histocompatibility antigen, A-28 alpha chain) (MHC class I antigen A*68)
A0A0D9SFP3	MAGI2	Membrane-associated guanylate kinase, WW and PDZ domain-containing protein 2
A0A0G2JHK4	DDR1	Epithelial discoidin domain-containing receptor 1 (Fragment)
F8WB79	SLC2A11	Solute carrier family 2, facilitated glucose transporter member 11
B7ZB78	RAP1B	Ras-related protein Rap-1b (cDNA, FLJ79442, highly similar to Ras-related protein Rap-1b)
A0A087WUK2	HNRNPDL	Heterogeneous nuclear ribonucleoprotein D-like (Heterogeneous nuclear ribonucleoprotein D-like, isoform CRA_b)
E9PNZ4	MACF1	Microtubule-actin cross-linking factor 1, isoforms 1/2/3/5 (Fragment)
Q9HCH5	SYTL2	Synaptotagmin-like protein 2 (Breast cancer-associated antigen SGA-72M) (Exophilin-4)
Q7Z7M0	MEGF8	Multiple epidermal growth factor-like domains protein 8 (Multiple EGF-like domains protein 8) (Epidermal growth factor-like protein 4) (EGF-like protein 4)
A0A0G2JMH6	HLA-DRA	HLA class II histocompatibility antigen, DR alpha chain (HLA-DRA)
A0A0C4DGH0	CD276	CD276 antigen
F8WCR1	RPL3	60S ribosomal protein L3
P09429	HMGB1	High mobility group protein B1 (High mobility group protein 1) (HMG-1)
A8MX12	MYOM1	Myomesin-1
Q8IWV2	CNTN4	Contactin-4 (Brain-derived immunoglobulin superfamily protein 2) (BIG-2)
P23443	RPS6KB1	Ribosomal protein S6 kinase beta-1 (S6K-beta-1) (S6K1) (EC 2.7.11.1) (70 kDa ribosomal protein S6 kinase 1) (P70S6K1) (p70-S6K 1) (Ribosomal protein S6 kinase I) (Serine/threonine-protein kinase 14A) (p70 ribosomal S6 kinase alpha) (p70 S6 kinase alpha) (p70 S6K-alpha) (p70 S6KA)
P08263	GSTA1	Glutathione S-transferase A1 (EC 2.5.1.18) (GST HA subunit 1) (GST class-alpha member 1) (GST-epsilon) (GSTA1-1) (GTH1) [Cleaved into: Glutathione S-transferase A1, N-terminally processed]
H0Y7C3	PPIL6	Peptidyl-prolyl cis-trans isomerase (PPIase) (EC 5.2.1.8) (Fragment)
P98179	RBM3	RNA-binding protein 3 (RNA-binding motif protein 3) (RNPL)
Q86WS5	TMPRSS12	Transmembrane protease serine 12 (EC 3.4.21.-)
Q7RTZ1	OVCH2	Ovochymase-2 (EC 3.4.21.-) (Oviductin)
U3KQT1	ESD	S-formylglutathione hydrolase (Fragment)
Q13094	LCP2	Lymphocyte cytosolic protein 2 (SH2 domain-containing leukocyte protein of 76 kDa) (SLP-76 tyrosine phosphoprotein) (SLP76)
H0YJ81	GABRG3	Gamma-aminobutyric acid receptor subunit gamma-3 (Fragment)
Q96J02	ITCH	E3 ubiquitin-protein ligase Itchy homolog (Itch) (EC 2.3.2.26) (Atrophin-1-interacting protein 4) (AIP4) (HECT-type E3 ubiquitin transferase Itchy homolog) (NFE2-associated polypeptide 1) (NAPP1)
Q5JX56	CPNE1	Copine-1 (Fragment)
Q01826	SATB1	DNA-binding protein SATB1 (Special AT-rich sequence-binding protein 1)
Q07812	BAX	Apoptosis regulator BAX (Bcl-2-like protein 4) (Bcl2-L-4)
C9JZW5	MFSD1	Major facilitator superfamily domain-containing protein 1 (Fragment)
Q9TNN7	HLA-C	HLA class I histocompatibility antigen, Cw-5 alpha chain (MHC class I antigen Cw*5)
J3QSE2	FTSJ3	pre-rRNA-processing protein FTSJ3 (Fragment)
G3V576	HNRNPC	Heterogeneous nuclear ribonucleoproteins C1/C2
P19622	EN2	Homeobox protein engrailed-2 (Homeobox protein en-2) (Hu-En-2)
G3V2Q1	HNRNPC	Heterogeneous nuclear ribonucleoproteins C1/C2
E7ERQ6	DAZ3	Deleted in azoospermia protein 3
Q99759	MAP3K3	Mitogen-activated protein kinase kinase kinase 3 (EC 2.7.11.25) (MAPK/ERK kinase kinase 3) (MEK kinase 3) (MEKK 3)
F8W1R9	TGFBR1	Receptor protein serine/threonine kinase (EC 2.7.11.30)
K7EIJ8	KATNAL2	Katanin p60 ATPase-containing subunit A-like 2 (Fragment)
P08922	ROS1	Proto-oncogene tyrosine-protein kinase ROS (EC 2.7.10.1) (Proto-oncogene c-Ros) (Proto-oncogene c-Ros-1) (Receptor tyrosine kinase c-ros oncogene 1) (c-Ros receptor tyrosine kinase)
E7ES60	RAB34	Ras-related protein Rab-34, isoform NARR
Q86SR1	GALNT10	Polypeptide N-acetylgalactosaminyltransferase 10 (EC 2.4.1.41) (Polypeptide GalNAc transferase 10) (GalNAc-T10) (pp-GaNTase 10) (Protein-UDP acetylgalactosaminyltransferase 10) (UDP-GalNAc:polypeptide N-acetylgalactosaminyltransferase 10)
P30457	HLA-A	HLA class I histocompatibility antigen, A-66 alpha chain (Aw-66) (HLA class I histocompatibility antigen, A-10 alpha chain) (MHC class I antigen A*66)
C9J3V9	CHN1	N-chimaerin (Fragment)
H3BNV9	COX4I1	Cytochrome c oxidase subunit 4 isoform 1, mitochondrial
A0A0C4DH30	IGHV3-16	Immunoglobulin heavy variable 3-16 (non-functional) (Fragment)
J3QKS7	SMARCE1	SWI/SNF-related matrix-associated actin-dependent regulator of chromatin subfamily E member 1 (Fragment)
F5H8B0	F7	Coagulation factor VII
A0A140TA54	COL11A2	Collagen alpha-2(XI) chain
O75078	ADAM11	Disintegrin and metalloproteinase domain-containing protein 11 (ADAM 11) (Metalloproteinase-like, disintegrin-like, and cysteine-rich protein) (MDC)
P20333	TNFRSF1B	Tumor necrosis factor receptor superfamily member 1B (Tumor necrosis factor receptor 2) (TNF-R2) (Tumor necrosis factor receptor type II) (TNF-RII) (TNFR-II) (p75) (p80 TNF-alpha receptor) (CD antigen CD120b) (Etanercept) [Cleaved into: Tumor necrosis factor receptor superfamily member 1b, membrane form; Tumor necrosis factor-binding protein 2 (TBP-2) (TBPII)]
E7EWV2	KCNJ15	ATP-sensitive inward rectifier potassium channel 15 (Fragment)
H0YA62	CCNB1	G2/mitotic-specific cyclin-B1 (Fragment)
F6QWF9		Deleted.
P63133	ERVK-8	Endogenous retrovirus group K member 8 Pol protein (HERV-K115 Pol protein) (HERV-K_8p23.1 provirus ancestral Pol protein) [Includes: Reverse transcriptase (RT) (EC 2.7.7.49); Ribonuclease H (RNase H) (EC 3.1.26.4); Integrase (IN)]
P0CG39	POTEJ	POTE ankyrin domain family member J
E9PF78	ADAM22	Disintegrin and metalloproteinase domain-containing protein 22 (Fragment)
Q8IV77	CNGA4	Cyclic nucleotide-gated cation channel alpha-4 (Cyclic nucleotide-gated channel alpha-4) (CNG channel alpha-4) (CNG-4) (CNG4)
F6XEV2	MICU1	Calcium uptake protein 1, mitochondrial
P02748	C9	Complement component C9 [Cleaved into: Complement component C9a; Complement component C9b]
Q5TA58	AGO1	Protein argonaute-1
P20039	HLA-DRB1	HLA class II histocompatibility antigen, DRB1-11 beta chain (DR-5) (DR5) (DRw11) (MHC class II antigen DRB1*11)
P14651	HOXB3	Homeobox protein Hox-B3 (Homeobox protein Hox-2.7) (Homeobox protein Hox-2G)
Q2VIR3	EIF2S3L	Putative eukaryotic translation initiation factor 2 subunit 3-like protein (Eukaryotic translation initiation factor 2 subunit gamma A) (eIF-2-gamma A) (eIF-2gA)
Q3KNR5	PAX4	PAX4 protein (Paired box protein Pax-4)
Q9UNK4	PLA2G2D	Group IID secretory phospholipase A2 (GIID sPLA2) (sPLA2-IID) (EC 3.1.1.4) (PLA2IID) (Phosphatidylcholine 2-acylhydrolase 2D) (Secretory-type PLA, stroma-associated homolog)
E7EMG7	SLC16A14	Monocarboxylate transporter 14 (Fragment)
H7C123	RPL10	60S ribosomal protein L10 (Fragment)
A0A087WTE0	ALDH3B1	Aldehyde dehydrogenase family 3 member B1 (Fragment)
Q8TDY4	ASAP3	Arf-GAP with SH3 domain, ANK repeat and PH domain-containing protein 3 (Development and differentiation-enhancing factor-like 1) (Protein up-regulated in liver cancer 1)
Q9UIX4	KCNG1	Potassium voltage-gated channel subfamily G member 1 (Voltage-gated potassium channel subunit Kv6.1) (kH2)
A0A087WYN9	DHX29	ATP-dependent RNA helicase DHX29 (EC 3.6.4.13) (DEAH box protein 29)
C9JEE7	WDR43	WD repeat-containing protein 43 (Fragment)
A0A0C4DGQ5	CAPNS1	Calpain small subunit 1
E9PI60	BRPF3	Bromodomain and PHD finger-containing protein 3
Q68DX3	FRMPD2	FERM and PDZ domain-containing protein 2 (PDZ domain-containing protein 4) (PDZ domain-containing protein 5C)
Q86YQ8	CPNE8	Copine-8 (Copine VIII)
I3L466	CREBBP	CREB-binding protein (Fragment)
H0YDJ3	PRPF4B	Serine/threonine-protein kinase PRP4 homolog (Fragment)
D6RA17	EXOSC9	Exosome complex component RRP45 (Exosome component 9, isoform CRA_e)
C9J979	INTS11	Integrator complex subunit 11 (Fragment)
P14672	SLC2A4	Solute carrier family 2, facilitated glucose transporter member 4 (Glucose transporter type 4, insulin-responsive) (GLUT-4)
P35712	SOX6	Transcription factor SOX-6
H3BRG5	STARD13	StAR-related lipid transfer protein 13 (Fragment)
A0A087X0M8	CHL1	Neural cell adhesion molecule L1-like protein
P11908	PRPS2	Ribose-phosphate pyrophosphokinase 2 (EC 2.7.6.1) (PPRibP) (Phosphoribosyl pyrophosphate synthase II) (PRS-II)
A0A0A0MR07	VAV1	Proto-oncogene vav
Q14766	LTBP1	Latent-transforming growth factor beta-binding protein 1 (LTBP-1) (Transforming growth factor beta-1-binding protein 1) (TGF-beta1-BP-1)
A0A140T9W8	COL11A2	Collagen alpha-2(XI) chain (Fragment)
Q58FF8	HSP90AB2P	Putative heat shock protein HSP 90-beta 2 (Heat shock protein 90-beta b) (Heat shock protein 90Bb)
O60469	DSCAM	Down syndrome cell adhesion molecule (CHD2)
F2Z2F6	SLC2A6	Solute carrier family 2, facilitated glucose transporter member 6 (Fragment)
P07711	CTSL	Cathepsin L1 (EC 3.4.22.15) (Cathepsin L) (Major excreted protein) (MEP) [Cleaved into: Cathepsin L1 heavy chain; Cathepsin L1 light chain]
Q6IQ42	SRSF10	FUSIP1 protein (Serine/arginine-rich-splicing factor 10)
X6R8H3	SGK2	Serine/threonine-protein kinase Sgk2
Q9C040	TRIM2	Tripartite motif-containing protein 2 (EC 2.3.2.27) (E3 ubiquitin-protein ligase TRIM2) (RING finger protein 86) (RING-type E3 ubiquitin transferase TRIM2)
H7C5H6	ARL6	ADP-ribosylation factor-like protein 6 (Fragment)
A0A087WZR6		Deleted.
Q9NS40	KCNH7	Potassium voltage-gated channel subfamily H member 7 (Ether-a-go-go-related gene potassium channel 3) (ERG-3) (Eag-related protein 3) (Ether-a-go-go-related protein 3) (hERG-3) (Voltage-gated potassium channel subunit Kv11.3)
F8WD25	PHKG1	Phosphorylase b kinase gamma catalytic chain, skeletal muscle/heart isoform
F5H4B5	ZAN	Zonadhesin
O43897	TLL1	Tolloid-like protein 1 (EC 3.4.24.-)
Q5VTE0	EEF1A1P5	Putative elongation factor 1-alpha-like 3 (EF-1-alpha-like 3) (Eukaryotic elongation factor 1 A-like 3) (eEF1A-like 3) (Eukaryotic translation elongation factor 1 alpha-1 pseudogene 5)
Q9H013	ADAM19	Disintegrin and metalloproteinase domain-containing protein 19 (ADAM 19) (EC 3.4.24.-) (Meltrin-beta) (Metalloprotease and disintegrin dendritic antigen marker) (MADDAM)
H3BM89	RPL4	60S ribosomal protein L4 (Ribosomal protein L4, isoform CRA_a)
Q13112	CHAF1B	Chromatin assembly factor 1 subunit B (CAF-1 subunit B) (Chromatin assembly factor I p60 subunit) (CAF-I 60 kDa subunit) (CAF-I p60) (M-phase phosphoprotein 7)
F5H0C8	ENO2	Gamma-enolase
H0Y379	KCNMA1	Calcium-activated potassium channel subunit alpha-1 (Fragment)
J3QL45	AKT2	RAC-beta serine/threonine-protein kinase (Fragment)
J3KR88	CORIN	Atrial natriuretic peptide-converting enzyme
Q5JR08	RHOC	Rho-related GTP-binding protein RhoC (Fragment)
K7EJK3	CELF4	CUGBP Elav-like family member 4 (Fragment)
Q86VQ3	TXNDC2	Thioredoxin domain-containing protein 2 (Spermatid-specific thioredoxin-1) (Sptrx-1)
C9JNV3	LSM8	U6 snRNA-associated Sm-like protein LSm8 (Fragment)
Q8N474	SFRP1	Secreted frizzled-related protein 1 (FRP-1) (sFRP-1) (Secreted apoptosis-related protein 2) (SARP-2)
E9PS53	HBS1L	HBS1-like protein (Fragment)
Q6UWY2	PRSS57	Serine protease 57 (EC 3.4.21.-) (Neutrophil serine protease 4) (NSP4) (Serine protease 1-like protein 1)
Q06416	POU5F1B	Putative POU domain, class 5, transcription factor 1B (Oct4-pg1) (Octamer-binding protein 3-like) (Octamer-binding transcription factor 3-like)
Q14807	KIF22	Kinesin-like protein KIF22 (Kinesin-like DNA-binding protein) (Kinesin-like protein 4)
O14981	BTAF1	TATA-binding protein-associated factor 172 (EC 3.6.4.-) (ATP-dependent helicase BTAF1) (B-TFIID transcription factor-associated 170 kDa subunit) (TAF(II)170) (TBP-associated factor 172) (TAF-172)
D6RDG2	TBCK	TBC domain-containing protein kinase-like protein (Fragment)
Q5FWF7	FBXO48	F-box only protein 48
Q5W0J0	RAB18	Ras-related protein Rab-18
A0A0A0MS00	IGLV3-32	Immunoglobulin lambda variable 3-32 (non-functional) (Fragment)
P30504	HLA-C	HLA class I histocompatibility antigen, Cw-4 alpha chain (MHC class I antigen Cw*4)
O95428	PAPLN	Papilin
P98161	PKD1	Polycystin-1 (PC1) (Autosomal dominant polycystic kidney disease 1 protein)
P09105	HBQ1	Hemoglobin subunit theta-1 (Hemoglobin theta-1 chain) (Theta-1-globin)
H0YJX2	PSMC6	26S proteasome regulatory subunit 10B (Fragment)
E7ENA5	DAZ4	Deleted in azoospermia protein 4
P59796	GPX6	Glutathione peroxidase 6 (GPx-6) (GSHPx-6) (EC 1.11.1.9)
O43187	IRAK2	Interleukin-1 receptor-associated kinase-like 2 (IRAK-2)
P61011	SRP54	Signal recognition particle 54 kDa protein (SRP54)
P22105	TNXB	Tenascin-X (TN-X) (Hexabrachion-like protein)
Q8WWF8	CAPSL	Calcyphosin-like protein
Q8IVL6	P3H3	Prolyl 3-hydroxylase 3 (EC 1.14.11.7) (Leprecan-like protein 2) (Protein B)
P63316	TNNC1	Troponin C, slow skeletal and cardiac muscles (TN-C)
A0A0A0MRJ0	CDC42BPA	Non-specific serine/threonine protein kinase (EC 2.7.11.1)
P78560	CRADD	Death domain-containing protein CRADD (Caspase and RIP adapter with death domain) (RIP-associated protein with a death domain)
Q9P2V4	LRIT1	Leucine-rich repeat, immunoglobulin-like domain and transmembrane domain-containing protein 1 (Leucine-rich repeat-containing protein 21) (Photoreceptor-associated LRR superfamily protein) (Retina-specific protein PAL)
Q7L0Q8	RHOU	Rho-related GTP-binding protein RhoU (CDC42-like GTPase 1) (GTP-binding protein-like 1) (Rho GTPase-like protein ARHU) (Ryu GTPase) (Wnt-1 responsive Cdc42 homolog 1) (WRCH-1)
Q96MC6	MFSD14A	Hippocampus abundant transcript 1 protein (Major facilitator superfamily domain-containing 14A) (Putative tetracycline transporter-like protein)
G3V5X3	COCH	Cochlin (Fragment)
M0QXH0	TXN2	Thioredoxin, mitochondrial
A6NC89	CNTNAP3	Contactin-associated protein-like 3
Q8NBK3	SUMF1	Sulfatase-modifying factor 1 (EC 1.8.99.-) (C-alpha-formylglycine-generating enzyme 1)
B5MCT7	PPM1F	Protein phosphatase 1F (Protein phosphatase 1F (PP2C domain containing), isoform CRA_a)
X6R6D0	SHC1	SHC-transforming protein 1
D6REY1	CHIT1	Chitotriosidase-1
M0R0W6	AXL	Tyrosine-protein kinase receptor UFO
A0A0B4J1Z1	SRSF7	Serine/arginine-rich-splicing factor 7 (Splicing factor, arginine/serine-rich 7, 35kDa, isoform CRA_a)
A0A182DWE9	HLA-DPB1	HLA class II histocompatibility antigen, DP beta 1 chain (MHC class II antigen)
F5H7T0	RPS6KC1	Ribosomal protein S6 kinase delta-1
O00444	PLK4	Serine/threonine-protein kinase PLK4 (EC 2.7.11.21) (Polo-like kinase 4) (PLK-4) (Serine/threonine-protein kinase 18) (Serine/threonine-protein kinase Sak)
H0YCK3	ADAR	Double-stranded RNA-specific adenosine deaminase (Fragment)
Q9NYY3	PLK2	Serine/threonine-protein kinase PLK2 (EC 2.7.11.21) (Polo-like kinase 2) (PLK-2) (hPlk2) (Serine/threonine-protein kinase SNK) (hSNK) (Serum-inducible kinase)
M0QZQ6	SH2D3A	SH2 domain-containing protein 3A (Fragment)
E5RI85	MOK	MAPK/MAK/MRK overlapping kinase
C9J8P8	ARMC8	Armadillo repeat-containing protein 8 (Fragment)
D6R9L0	RACK1	Receptor of-activated protein C kinase 1 (Fragment)
Q5TFM2	CFH	Complement factor H
P57052	RBM11	Splicing regulator RBM11 (RNA-binding motif protein 11)
Q7Z6J2	GRASP	General receptor for phosphoinositides 1-associated scaffold protein (GRP1-associated scaffold protein)
A0A0G2JPR0	C4A	Complement C4-A
A0A0G2JLD8	SSBP1	Single-stranded DNA-binding protein, mitochondrial (Fragment)
E9PPZ0	KCNQ1	Potassium voltage-gated channel subfamily KQT member 1 (Fragment)
Q8IZF2	ADGRF5	Adhesion G protein-coupled receptor F5 (G-protein coupled receptor 116)
A0A140T9P3	MICA	MHC class I polypeptide-related sequence A (Fragment)
D6RDM6	MFAP3L	Microfibrillar-associated protein 3-like (Fragment)
Q8N567	ZCCHC9	Zinc finger CCHC domain-containing protein 9
D6R9A6	HMGB2	High mobility group protein B2 (Fragment)
O43826	SLC37A4	Glucose-6-phosphate exchanger SLC37A4 (Glucose-5-phosphate transporter) (Glucose-6-phosphate translocase) (Solute carrier family 37 member 4) (Transformation-related gene 19 protein) (TRG-19)
A0A140T921	HLA-C	HLA class I histocompatibility antigen, Cw-6 alpha chain
J3KNW3	RBFOX1	RNA binding protein fox-1 homolog
A6NCS4	NKX2-6	Homeobox protein Nkx-2.6 (Homeobox protein NK-2 homolog F)
F8VXH8	PMEL	Melanocyte protein PMEL (Fragment)
Q9HCR9	PDE11A	Dual 3',5'-cyclic-AMP and -GMP phosphodiesterase 11A (EC 3.1.4.35) (EC 3.1.4.53) (cAMP and cGMP phosphodiesterase 11A)
P09017	HOXC4	Homeobox protein Hox-C4 (Homeobox protein CP19) (Homeobox protein Hox-3E)
Q7Z5P9	MUC19	Mucin-19 (MUC-19)
K7ERH1	CELF4	CUGBP Elav-like family member 4 (Fragment)
P15169	CPN1	Carboxypeptidase N catalytic chain (CPN) (EC 3.4.17.3) (Anaphylatoxin inactivator) (Arginine carboxypeptidase) (Carboxypeptidase N polypeptide 1) (Carboxypeptidase N small subunit) (Kininase-1) (Lysine carboxypeptidase) (Plasma carboxypeptidase B) (Serum carboxypeptidase N) (SCPN)
P01893	HLA-H	Putative HLA class I histocompatibility antigen, alpha chain H (HLA-12.4) (HLA-AR) (MHC class I antigen H)
Q6ZWH5	NEK10	Serine/threonine-protein kinase Nek10 (EC 2.7.11.1) (Never in mitosis A-related kinase 10) (NimA-related protein kinase 10)
F8VPL3	AQP2	Aquaporin-2 (Fragment)
E9PKG2	LRP8	Low-density lipoprotein receptor-related protein 8
Q5T0M2	SFTPD	Pulmonary surfactant-associated protein D (Fragment)
F5H6L3	ARHGAP44	Rho GTPase-activating protein 44
P49792	RANBP2	E3 SUMO-protein ligase RanBP2 (EC 2.3.2.-) (358 kDa nucleoporin) (Nuclear pore complex protein Nup358) (Nucleoporin Nup358) (Ran-binding protein 2) (RanBP2) (p270)
P01178	OXT	Oxytocin-neurophysin 1 (OT-NPI) [Cleaved into: Oxytocin (Ocytocin); Neurophysin 1]
A0A1B0GVD5	CTSD	Cathepsin D
Q6UWB4	PRSS55	Serine protease 55 (EC 3.4.21.-) (Testis serine protease 1) (T-SP1)
Q9BYH1	SEZ6L	Seizure 6-like protein
Q6P2Q0	ABCB9	ABCB9 protein (ATP-binding cassette sub-family B member 9)
O43155	FLRT2	Leucine-rich repeat transmembrane protein FLRT2 (Fibronectin-like domain-containing leucine-rich transmembrane protein 2)
G5E9Z6	GABRA2	Gamma-aminobutyric acid (GABA) A receptor, alpha 2, isoform CRA_b (Gamma-aminobutyric acid A receptor alpha 2 isoform 1) (Gamma-aminobutyric acid receptor subunit alpha-2)
H0YLD1	PRTG	Protogenin (Fragment)
I3L310	NAA38	N-alpha-acetyltransferase 38, NatC auxiliary subunit
P12259	F5	Coagulation factor V (Activated protein C cofactor) (Proaccelerin, labile factor) [Cleaved into: Coagulation factor V heavy chain; Coagulation factor V light chain]
F8W0P6	UNC13A	Protein unc-13 homolog A
P00747	PLG	Plasminogen (EC 3.4.21.7) [Cleaved into: Plasmin heavy chain A; Activation peptide; Angiostatin; Plasmin heavy chain A, short form; Plasmin light chain B]
Q5SYQ7	ALDH1A1	Retinal dehydrogenase 1 (Fragment)
P55795	HNRNPH2	Heterogeneous nuclear ribonucleoprotein H2 (hnRNP H2) (FTP-3) (Heterogeneous nuclear ribonucleoprotein H') (hnRNP H') [Cleaved into: Heterogeneous nuclear ribonucleoprotein H2, N-terminally processed]
P62942	FKBP1A	Peptidyl-prolyl cis-trans isomerase FKBP1A (PPIase FKBP1A) (EC 5.2.1.8) (12 kDa FK506-binding protein) (12 kDa FKBP) (FKBP-12) (Calstabin-1) (FK506-binding protein 1A) (FKBP-1A) (Immunophilin FKBP12) (Rotamase)
B8ZZK1	SLC3A1	Neutral and basic amino acid transport protein rBAT
H7C1R8	SLC22A5	Solute carrier family 22 member 5 (Fragment)
K7EN73	ALDH3A2	Fatty aldehyde dehydrogenase (Fragment)
Q9P1I2	SLC16A10	Monocarboxylate transporter 10 (PRO0813)
Q14558	PRPSAP1	Phosphoribosyl pyrophosphate synthase-associated protein 1 (PRPP synthase-associated protein 1) (39 kDa phosphoribosypyrophosphate synthase-associated protein) (PAP39)
A0A140T9J9	HLA-C	HLA class I histocompatibility antigen, Cw-6 alpha chain
A0A140T9I5	MICA	MHC class I polypeptide-related sequence A (Fragment)
P0CF51	TRGC1	T-cell receptor gamma chain C region 1
P13611	VCAN	Versican core protein (Chondroitin sulfate proteoglycan core protein 2) (Chondroitin sulfate proteoglycan 2) (Glial hyaluronate-binding protein) (GHAP) (Large fibroblast proteoglycan) (PG-M)
P52298	NCBP2	Nuclear cap-binding protein subunit 2 (20 kDa nuclear cap-binding protein) (Cell proliferation-inducing gene 55 protein) (NCBP 20 kDa subunit) (CBP20) (NCBP-interacting protein 1) (NIP1)
Q86XP3	DDX42	ATP-dependent RNA helicase DDX42 (EC 3.6.4.13) (DEAD box protein 42) (RNA helicase-like protein) (RHELP) (RNA helicase-related protein) (RNAHP) (SF3b DEAD box protein) (Splicing factor 3B-associated 125 kDa protein) (SF3b125)
D6RAU2	RACK1	Receptor of-activated protein C kinase 1
H0Y4G9	MYD88	Myeloid differentiation primary response protein MyD88 (Fragment)
Q15139	PRKD1	Serine/threonine-protein kinase D1 (EC 2.7.11.13) (Protein kinase C mu type) (Protein kinase D) (nPKC-D1) (nPKC-mu)
P20702	ITGAX	Integrin alpha-X (CD11 antigen-like family member C) (Leu M5) (Leukocyte adhesion glycoprotein p150,95 alpha chain) (Leukocyte adhesion receptor p150,95) (CD antigen CD11c)
P13671	C6	Complement component C6
Q9Y6Z7	COLEC10	Collectin-10 (Collectin liver protein 1) (CL-L1) (Collectin-34) (CL-34)
G5E9E7	TJP1	Tight junction protein 1 (Zona occludens 1), isoform CRA_e (Tight junction protein ZO-1)
H7C2I6	IRAK1	Interleukin-1 receptor-associated kinase 1 (Fragment)
A0A075B734	LOC100509620	Uncharacterized protein
X6REW1	BAG6	Large proline-rich protein BAG6 (Fragment)
Q9UBK7	RABL2A	Rab-like protein 2A
Q9BXJ5	C1QTNF2	Complement C1q tumor necrosis factor-related protein 2
B4DUT8	CNN2	Calponin
Q9NY47	CACNA2D2	Voltage-dependent calcium channel subunit alpha-2/delta-2 (Voltage-gated calcium channel subunit alpha-2/delta-2) [Cleaved into: Voltage-dependent calcium channel subunit alpha-2-2; Voltage-dependent calcium channel subunit delta-2]
F8VWU4	RAB5C	Ras-related protein Rab-5C (Fragment)
F8VU08	HHEX	Hematopoietically-expressed homeobox protein HHEX
Q9UKA9	PTBP2	Polypyrimidine tract-binding protein 2 (Neural polypyrimidine tract-binding protein) (Neurally-enriched homolog of PTB) (PTB-like protein)
H3BVB4	DOK4	Docking protein 4 (Fragment)
P23634	ATP2B4	Plasma membrane calcium-transporting ATPase 4 (PMCA4) (EC 3.6.3.8) (Matrix-remodeling-associated protein 1) (Plasma membrane calcium ATPase isoform 4) (Plasma membrane calcium pump isoform 4)
K7EKA8	ADAM11	Disintegrin and metalloproteinase domain-containing protein 11 (Fragment)
H3BN14	CALB2	Calretinin (Fragment)
F6U341	BAG6	Large proline-rich protein BAG6 (Fragment)
E9PGC0	RASA1	Ras GTPase-activating protein 1
H0YIZ5	PLEK2	Pleckstrin-2 (Fragment)
Q9GZP0	PDGFD	Platelet-derived growth factor D (PDGF-D) (Iris-expressed growth factor) (Spinal cord-derived growth factor B) (SCDGF-B) [Cleaved into: Platelet-derived growth factor D, latent form (PDGFD latent form); Platelet-derived growth factor D, receptor-binding form (PDGFD receptor-binding form)]
Q5TAH2	SLC9C2	Sodium/hydrogen exchanger 11 (Na(+)/H(+) exchanger 11) (NHE-11) (Solute carrier family 9 member 11) (Solute carrier family 9 member C2)
P30510	HLA-C	HLA class I histocompatibility antigen, Cw-14 alpha chain (MHC class I antigen Cw*14)
F8WD88	CENPA	Histone H3-like centromeric protein A
P47944	MT4	Metallothionein-4 (MT-4) (Metallothionein-IV) (MT-IV)
Q96IY4	CPB2	Carboxypeptidase B2 (EC 3.4.17.20) (Carboxypeptidase U) (CPU) (Plasma carboxypeptidase B) (pCPB) (Thrombin-activable fibrinolysis inhibitor) (TAFI)
E9PIZ5	TXNRD1	Thioredoxin reductase 1, cytoplasmic (Fragment)
Q93079	HIST1H2BH	Histone H2B type 1-H (Histone H2B.j) (H2B/j)
Q8WXF1	PSPC1	Paraspeckle component 1 (Paraspeckle protein 1)
M0QY05	CD22	B-cell receptor CD22 (Fragment)
R4GNA5	YME1L1	ATP-dependent zinc metalloprotease YME1L1 (Fragment)
Q5STU3	DDX39B	Spliceosome RNA helicase DDX39B
H0Y7T7	LRP1B	Low-density lipoprotein receptor-related protein 1B (Fragment)
A0A087WT27	PGM3	Phosphoacetylglucosamine mutase (Phosphoglucomutase 3, isoform CRA_b)
Q9HB31	SEBOX	Homeobox protein SEBOX (Homeobox OG-9) (Skin-, embryo-, brain- and oocyte-specific homeobox)
E5RGA9	NCALD	Neurocalcin-delta
A0A0A0MTK4	SYT14	Synaptotagmin-14 (Fragment)
Q5T047	SLC22A7	Solute carrier family 22 member 7 (Fragment)
Q9NSV5	AQP6	Aquaporin-6
A0A0B4J1U3	IGLV1-36	Immunoglobulin lambda variable 1-36
P20264	POU3F3	POU domain, class 3, transcription factor 3 (Brain-specific homeobox/POU domain protein 1) (Brain-1) (Brn-1) (Octamer-binding protein 8) (Oct-8) (Octamer-binding transcription factor 8) (OTF-8)
Q04446	GBE1	1,4-alpha-glucan-branching enzyme (EC 2.4.1.18) (Brancher enzyme) (Glycogen-branching enzyme)
Q9H6I2	SOX17	Transcription factor SOX-17
Q5VVH2	FKBP1C	Peptidylprolyl isomerase (EC 5.2.1.8)
Q8IUN7	ADH6	ADH6 protein (Alcohol dehydrogenase 6)
Q92859	NEO1	Neogenin (Immunoglobulin superfamily DCC subclass member 2)
B5MCV4	C1S	Complement C1s subcomponent (Fragment)
D6RCB1	MAPK10	Mitogen-activated protein kinase (EC 2.7.11.24)
C9JEA7	PLCD4	Phosphoinositide phospholipase C (EC 3.1.4.11)
M0QZR9	ELAVL1	ELAV-like protein 1
O14641	DVL2	Segment polarity protein dishevelled homolog DVL-2 (Dishevelled-2) (DSH homolog 2)
F5H6S5	C1RL	Complement C1r subcomponent-like protein (Fragment)
Q5VUJ6	LRCH2	Leucine-rich repeat and calponin homology domain-containing protein 2
B9ZVR7	SPEG	Striated muscle preferentially-expressed protein kinase
A1L390	PLEKHG3	Pleckstrin homology domain-containing family G member 3 (PH domain-containing family G member 3)
J3KRK0	TLK2	Serine/threonine-protein kinase tousled-like 2 (Fragment)
C9K0K7	PRPSAP2	Phosphoribosyl pyrophosphate synthase-associated protein 2 (Fragment)
A0A0U1RQV3	EFEMP1	EGF-containing fibulin-like extracellular matrix protein 1 (Fragment)
X6RHF8	PDIK1L	Serine/threonine-protein kinase PDIK1L (Fragment)
P20648	ATP4A	Potassium-transporting ATPase alpha chain 1 (EC 3.6.3.10) (Gastric H(+)/K(+) ATPase subunit alpha) (Proton pump)
O75096	LRP4	Low-density lipoprotein receptor-related protein 4 (LRP-4) (Multiple epidermal growth factor-like domains 7)
Q04760	GLO1	Lactoylglutathione lyase (EC 4.4.1.5) (Aldoketomutase) (Glyoxalase I) (Glx I) (Ketone-aldehyde mutase) (Methylglyoxalase) (S-D-lactoylglutathione methylglyoxal lyase)
F8WC54	ADAM9	Disintegrin and metalloproteinase domain-containing protein 9
A0A0C4DGL6	AQP8	Aquaporin-8
A0A140T9W2	HLA-C	HLA class I histocompatibility antigen, Cw-6 alpha chain
P16189	HLA-A	HLA class I histocompatibility antigen, A-31 alpha chain (MHC class I antigen A*31)
Q12834	CDC20	Cell division cycle protein 20 homolog (p55CDC)
B0QZ43	ERLIN1	Erlin-1 (Fragment)
P13637	ATP1A3	Sodium/potassium-transporting ATPase subunit alpha-3 (Na(+)/K(+) ATPase alpha-3 subunit) (EC 3.6.3.9) (Na(+)/K(+) ATPase alpha(III) subunit) (Sodium pump subunit alpha-3)
E7EUE6	SCN3A	Sodium channel protein type 3 subunit alpha (Fragment)
F5GWT0	PGA5	Pepsin A-5
D6R997	COPB2	Coatomer subunit beta' (Fragment)
Q9UG01	IFT172	Intraflagellar transport protein 172 homolog
Q9NTZ6	RBM12	RNA-binding protein 12 (RNA-binding motif protein 12) (SH3/WW domain anchor protein in the nucleus) (SWAN)
A6NEQ0	RBMY1E	RNA-binding motif protein, Y chromosome, family 1 member E
Q9HAC8	UBTD1	Ubiquitin domain-containing protein 1
Q5JWQ6	NRP1	Neuropilin
P0C0L4	C4A	Complement C4-A (Acidic complement C4) (C3 and PZP-like alpha-2-macroglobulin domain-containing protein 2) [Cleaved into: Complement C4 beta chain; Complement C4-A alpha chain; C4a anaphylatoxin; C4b-A; C4d-A; Complement C4 gamma chain]
M0R102	EXOSC5	Exosome complex component RRP46 (Fragment)
A0A0G2JSC0	IGLV5-45	Immunoglobulin lambda variable 5-45 (Fragment)
Q86UP6	CUZD1	CUB and zona pellucida-like domain-containing protein 1 (CUB and ZP domain-containing protein 1) (Transmembrane protein UO-44)
Q5JXX5	GLRA4	Glycine receptor subunit alpha-4
Q969X6	UTP4	U3 small nucleolar RNA-associated protein 4 homolog (Cirhin) (UTP4 small subunit processome component)
Q8TAD4	SLC30A5	Zinc transporter 5 (ZnT-5) (Solute carrier family 30 member 5) (ZnT-like transporter 1) (hZTL1)
A0A0D9SGI4	MELK	Maternal embryonic leucine zipper kinase (Fragment)
P22891	PROZ	Vitamin K-dependent protein Z
O14558	HSPB6	Heat shock protein beta-6 (HspB6) (Heat shock 20 kDa-like protein p20)
A0A0G2JJM1	BAG6	Large proline-rich protein BAG6 (Fragment)
A0A087WZS4	NCAM1	Neural cell adhesion molecule 1 (Fragment)
H7C3X8	SIK3	Serine/threonine-protein kinase SIK3 (Fragment)
Q5T7Y4	S100A1	Protein S100-A1 (S100 calcium binding protein A1 isoform 2)
H0YAK0	GALNT7	N-acetylgalactosaminyltransferase 7 (Fragment)
J3KQJ8	SPATA13	Spermatogenesis-associated protein 13 (Fragment)
C9JQ63	CPA1	Carboxypeptidase A1 (Fragment)
A4D1S5	RAB19	Ras-related protein Rab-19
A0A0J9YYE9	TRBC1	T-cell receptor beta-1 chain C region (Fragment)
Q9UQG0	ERVK-11	Endogenous retrovirus group K member 11 Pol protein (HERV-K_3q27.2 provirus ancestral Pol protein) [Includes: Reverse transcriptase (RT) (EC 2.7.7.49); Ribonuclease H (RNase H) (EC 3.1.26.4); Integrase (IN)]
D6R9Z7	COX7C	Cytochrome c oxidase subunit 7C, mitochondrial
H3BSG9	PLA2G4F	Cytosolic phospholipase A2 zeta
F8WE98	FLNA	Filamin-A (Fragment)
Q12805	EFEMP1	EGF-containing fibulin-like extracellular matrix protein 1 (Extracellular protein S1-5) (Fibrillin-like protein) (Fibulin-3) (FIBL-3)
O94769	ECM2	Extracellular matrix protein 2 (Matrix glycoprotein SC1/ECM2)
A6NKZ9	TIAL1	Nucleolysin TIAR
O95741	CPNE6	Copine-6 (Copine VI) (Neuronal-copine) (N-copine)
M0QZS0	ARHGEF18	Rho guanine nucleotide exchange factor 18 (Fragment)
C9J8V5	GTPBP8	GTP-binding protein 8
A0A087WWD4	NCAM1	Neural cell adhesion molecule 1
A8MXD5	GRXCR1	Glutaredoxin domain-containing cysteine-rich protein 1
U5Y3L1	SP140L	Nuclear body protein SP140-like protein (SP140L-1 protein)
Q8N5V2	NGEF	Ephexin-1 (Eph-interacting exchange protein) (Neuronal guanine nucleotide exchange factor)
Q5T244	DDR2	Discoidin domain-containing receptor 2 (Fragment)
A0A0A6YYK1	TRAV8-1	T cell receptor alpha variable 8-1
H0YMQ3	LDLR	Low-density lipoprotein receptor (Fragment)
C9JWX1	GLB1	Beta-galactosidase (Fragment)
C9JYK0	LRCH4	Leucine-rich repeat and calponin homology domain-containing protein 4
G3V380	ACTN1	Alpha-actinin-1 (Fragment)
J3QSH2	CCNL2	Cyclin-L2 (Fragment)
F5GXS0	C4B	Complement C4-B
P35499	SCN4A	Sodium channel protein type 4 subunit alpha (SkM1) (Sodium channel protein skeletal muscle subunit alpha) (Sodium channel protein type IV subunit alpha) (Voltage-gated sodium channel subunit alpha Nav1.4)
F8W8I6	TIA1	Nucleolysin TIA-1 isoform p40
E9PHZ9	HBS1L	HBS1-like protein (Fragment)
Q9Y2G3	ATP11B	Probable phospholipid-transporting ATPase IF (EC 3.6.3.1) (ATPase IR) (ATPase class VI type 11B) (P4-ATPase flippase complex alpha subunit ATP11B)
Q5T8Q9	GSTM5	Glutathione S-transferase (EC 2.5.1.18)
J3KSK7	MPRIP	Myosin phosphatase Rho-interacting protein (Fragment)
Q9H2H8	PPIL3	Peptidyl-prolyl cis-trans isomerase-like 3 (PPIase) (EC 5.2.1.8) (Cyclophilin J) (CyPJ) (Cyclophilin-like protein PPIL3) (Rotamase PPIL3)
Q9H2B2	SYT4	Synaptotagmin-4 (Synaptotagmin IV) (SytIV)
Q5W0S5	RAD23B	UV excision repair protein RAD23 homolog B (Fragment)
A0A0D9SF98	NCAM1	Neural cell adhesion molecule 1 (Fragment)
Q9Y5S2	CDC42BPB	Serine/threonine-protein kinase MRCK beta (EC 2.7.11.1) (CDC42-binding protein kinase beta) (CDC42BP-beta) (DMPK-like beta) (Myotonic dystrophy kinase-related CDC42-binding kinase beta) (MRCK beta) (Myotonic dystrophy protein kinase-like beta)
Q58FF6	HSP90AB4P	Putative heat shock protein HSP 90-beta 4
Q8TEU7	RAPGEF6	Rap guanine nucleotide exchange factor 6 (PDZ domain-containing guanine nucleotide exchange factor 2) (PDZ-GEF2) (RA-GEF-2)
A0A0G2JR65	MUC2	Mucin-2
F6VDE0	SMARCA2	Probable global transcription activator SNF2L2
Q6PID9	ACAN	Aggrecan (Aggrecan core protein)
A0A0U1RQT1	ACAP2	Arf-GAP with coiled-coil, ANK repeat and PH domain-containing protein 2 (Fragment)
Q96JA3	PLEKHA8	Pleckstrin homology domain-containing family A member 8 (PH domain-containing family A member 8) (Phosphatidylinositol-four-phosphate adapter protein 2) (FAPP-2) (Phosphoinositol 4-phosphate adapter protein 2) (hFAPP2) (Serologically defined breast cancer antigen NY-BR-86)
Q6WKZ4	RAB11FIP1	Rab11 family-interacting protein 1 (Rab11-FIP1) (Rab-coupling protein)
A0A075B6G3	DMD	Dystrophin
F6TC96	BAG6	Large proline-rich protein BAG6 (Fragment)
H0Y3H6	C2	Complement C2 (Fragment)
F5H6W8	LDHA	L-lactate dehydrogenase A chain
G3V4I6	AKT1	RAC-alpha serine/threonine-protein kinase (Fragment)
E7ETG2	ERN2	Serine/threonine-protein kinase/endoribonuclease IRE2
Q3KPI9	PTPRD	PTPRD protein (Receptor-type tyrosine-protein phosphatase delta)
Q8N4G2	ARL14	ADP-ribosylation factor-like protein 14 (ADP-ribosylation factor 7)
Q9Y3B7	MRPL11	39S ribosomal protein L11, mitochondrial (L11mt) (MRP-L11) (Mitochondrial large ribosomal subunit protein uL11m)
O14863	SLC30A4	Zinc transporter 4 (ZnT-4) (Solute carrier family 30 member 4)
D6RBW0	CENPE	Centromere-associated protein E (Fragment)
Q9P212	PLCE1	1-phosphatidylinositol 4,5-bisphosphate phosphodiesterase epsilon-1 (EC 3.1.4.11) (Pancreas-enriched phospholipase C) (Phosphoinositide phospholipase C-epsilon-1) (Phospholipase C-epsilon-1) (PLC-epsilon-1)
Q9HCJ2	LRRC4C	Leucine-rich repeat-containing protein 4C (Netrin-G1 ligand) (NGL-1)
J3KPQ0	FGFR4	Fibroblast growth factor receptor (EC 2.7.10.1)
H3BLU2	LSAMP	Limbic system-associated membrane protein (Fragment)
Q96FC7	PHYHIPL	Phytanoyl-CoA hydroxylase-interacting protein-like
E9PKU4	RPL8	60S ribosomal protein L8 (Fragment)
P26885	FKBP2	Peptidyl-prolyl cis-trans isomerase FKBP2 (PPIase FKBP2) (EC 5.2.1.8) (13 kDa FK506-binding protein) (13 kDa FKBP) (FKBP-13) (FK506-binding protein 2) (FKBP-2) (Immunophilin FKBP13) (Rotamase)
H7C3L9	MERTK	Tyrosine-protein kinase Mer (Fragment)
H7C2C5	RPL10	60S ribosomal protein L10 (Fragment)
F5H0H6	PGA4	Pepsin A-3 (Pepsin A-4)
A0A0C4DFP6	CRTAC1	Cartilage acidic protein 1
C9J7Q4	ABHD11	Protein ABHD11
P03989	HLA-B	HLA class I histocompatibility antigen, B-27 alpha chain (MHC class I antigen B*27)
Q8N1P7	CRYBG2	Beta/gamma crystallin domain-containing protein 2 (Absent in melanoma 1-like protein)
Q9UKH3	ERVK-9	Endogenous retrovirus group K member 9 Env polyprotein (EnvK4 protein) (Envelope polyprotein) (HERV-K(C6) envelope protein) (HERV-K109 envelope protein) (HERV-K_6q14.1 provirus ancestral Env polyprotein) [Cleaved into: Surface protein (SU); Transmembrane protein (TM)]
Q9UI40	SLC24A2	Sodium/potassium/calcium exchanger 2 (Na(+)/K(+)/Ca(2+)-exchange protein 2) (Retinal cone Na-Ca+K exchanger) (Solute carrier family 24 member 2)
D6RA44	CDK18	Cyclin-dependent kinase 18 (Fragment)
Q5JR07	RHOC	Rho-related GTP-binding protein RhoC (Fragment)
H0Y3M4	ZP3	Zona pellucida sperm-binding protein 3 (Fragment)
A0A1B0GTG6	CACNA1A	Voltage-dependent P/Q-type calcium channel subunit alpha-1A (Fragment)
Q5JUK3	KCNT1	Potassium channel subfamily T member 1 (KCa4.1)
H0YF66	REXO2	Oligoribonuclease, mitochondrial (Fragment)
B7Z637	ARMC8	Armadillo repeat containing 8, isoform CRA_g (Armadillo repeat-containing protein 8) (cDNA FLJ53383, highly similar to Homo sapiens armadillo repeat containing 8 (ARMC8), transcript variant 2, mRNA)
H0Y8D6	ABCA2	ATP-binding cassette sub-family A member 2 (Fragment)
Q9NP31	SH2D2A	SH2 domain-containing protein 2A (SH2 domain-containing adapter protein) (T cell-specific adapter protein) (TSAd) (VEGF receptor-associated protein)
F5H2J1	MYO3B	Myosin-IIIb (Fragment)
H0Y799	BRD2	Bromodomain-containing protein 2 (Fragment)
Q9P2J9	PDP2	[Pyruvate dehydrogenase [acetyl-transferring]]-phosphatase 2, mitochondrial (PDP 2) (EC 3.1.3.43) (Pyruvate dehydrogenase phosphatase catalytic subunit 2) (PDPC 2)
D3YTJ7	PRPS2	Ribose-phosphate pyrophosphokinase 2
Q9UGM3	DMBT1	Deleted in malignant brain tumors 1 protein (Glycoprotein 340) (Gp-340) (Hensin) (Salivary agglutinin) (SAG) (Surfactant pulmonary-associated D-binding protein)
Q9WJR5	ERVK-19	Endogenous retrovirus group K member 19 Pol protein (HERV-K(C19) Pol protein) (HERV-K_19q11 provirus ancestral Pol protein) [Includes: Reverse transcriptase (RT) (EC 2.7.7.49); Ribonuclease H (RNase H) (EC 3.1.26.4); Integrase (IN)]
Q99700	ATXN2	Ataxin-2 (Spinocerebellar ataxia type 2 protein) (Trinucleotide repeat-containing gene 13 protein)
P46109	CRKL	Crk-like protein
I3L1D4	RBFOX1	RNA-binding protein fox-1 homolog 1 (Fragment)
Q5JRP2	ADAM12	Disintegrin and metalloproteinase domain-containing protein 12 (Fragment)
Q9Y3M8	STARD13	StAR-related lipid transfer protein 13 (46H23.2) (Deleted in liver cancer 2 protein) (DLC-2) (Rho GTPase-activating protein) (START domain-containing protein 13) (StARD13)
P26992	CNTFR	Ciliary neurotrophic factor receptor subunit alpha (CNTF receptor subunit alpha) (CNTFR-alpha)
A0A0U1RR72	PRSS22	Brain-specific serine protease 4
P30450	HLA-A	HLA class I histocompatibility antigen, A-26 alpha chain (MHC class I antigen A*26)
J3QLC8	RPL17	60S ribosomal protein L17
A0A0G2JRD1	RBFOX2	RNA-binding protein fox-1 homolog 2 (Fragment)
Q5TBN3	LCP1	Plastin-2 (Fragment)
C9WSJ3	HGF	Hepatocyte growth factor (Hepatocyte growth factor isoform 6)
Q9HC10	OTOF	Otoferlin (Fer-1-like protein 2)
Q49AQ3	CERS5	Ceramide synthase 5 (LASS5 protein)
Q9NWM8	FKBP14	Peptidyl-prolyl cis-trans isomerase FKBP14 (PPIase FKBP14) (EC 5.2.1.8) (22 kDa FK506-binding protein) (22 kDa FKBP) (FKBP-22) (FK506-binding protein 14) (FKBP-14) (Rotamase)
A0A1B0GUN6	CACNA1D	Voltage-dependent L-type calcium channel subunit alpha
H3BLV4	SUSD1	Sushi domain-containing protein 1 (Fragment)
P41002	CCNF	Cyclin-F (F-box only protein 1)
A0A0U1RQW7	SMARCA2	Probable global transcription activator SNF2L2 (Fragment)
E5RGN6	IPCEF1	Interactor protein for cytohesin exchange factors 1 (Fragment)
P00750	PLAT	Tissue-type plasminogen activator (t-PA) (t-plasminogen activator) (tPA) (EC 3.4.21.68) (Alteplase) (Reteplase) [Cleaved into: Tissue-type plasminogen activator chain A; Tissue-type plasminogen activator chain B]
A0A0A0MT20	EMILIN1	EMILIN-1 (Fragment)
F5H4R1	MAP3K4	Mitogen-activated protein kinase kinase kinase 4
H3BUW0	SIRPB1	Signal-regulatory protein beta-1 (Fragment)
A0A0A0MR25	FGFR2	Fibroblast growth factor receptor (EC 2.7.10.1)
E9PRX0	RAB30	Ras-related protein Rab-30 (Fragment)
H0YJB1	TSSK4	Testis-specific serine/threonine-protein kinase 4 (Fragment)
A0A087WY22	PTPRT	Receptor-type tyrosine-protein phosphatase T
Q13424	SNTA1	Alpha-1-syntrophin (59 kDa dystrophin-associated protein A1 acidic component 1) (Pro-TGF-alpha cytoplasmic domain-interacting protein 1) (TACIP1) (Syntrophin-1)
Q5VVC8	RPL11	60S ribosomal protein L11 (Fragment)
Q8TDC3	BRSK1	Serine/threonine-protein kinase BRSK1 (EC 2.7.11.1) (Brain-selective kinase 1) (EC 2.7.11.26) (Brain-specific serine/threonine-protein kinase 1) (BR serine/threonine-protein kinase 1) (Serine/threonine-protein kinase SAD-B) (Synapses of Amphids Defective homolog 1) (SAD1 homolog) (hSAD1)
J3KTG1	ALDH3A2	Fatty aldehyde dehydrogenase (Fragment)
P08238	HSP90AB1	Heat shock protein HSP 90-beta (HSP 90) (Heat shock 84 kDa) (HSP 84) (HSP84)
P61601	NCALD	Neurocalcin-delta
A0A0A0MRY8	NEK10	Serine/threonine-protein kinase Nek10
P49841	GSK3B	Glycogen synthase kinase-3 beta (GSK-3 beta) (EC 2.7.11.26) (Serine/threonine-protein kinase GSK3B) (EC 2.7.11.1)
A0A1B0GW67	SCN2A	Sodium channel protein type 2 subunit alpha
C9JK28	ADAM7	Disintegrin and metalloproteinase domain-containing protein 7
E5RH67	CETN3	Centrin-3
Q86V90	SCN5A	SCN5A protein (Sodium channel protein type 5 subunit alpha)
Q9H8L6	MMRN2	Multimerin-2 (EMILIN-3) (Elastin microfibril interface located protein 3) (Elastin microfibril interfacer 3) (EndoGlyx-1 p125/p140 subunit)
H0YL19	WDR61	WD repeat-containing protein 61
Q5VVV6	SLC2A8	Solute carrier family 2, facilitated glucose transporter member 8 (Fragment)
J3QQZ1		Deleted.
O60840	CACNA1F	Voltage-dependent L-type calcium channel subunit alpha-1F (Voltage-gated calcium channel subunit alpha Cav1.4)
P48740	MASP1	Mannan-binding lectin serine protease 1 (EC 3.4.21.-) (Complement factor MASP-3) (Complement-activating component of Ra-reactive factor) (Mannose-binding lectin-associated serine protease 1) (MASP-1) (Mannose-binding protein-associated serine protease) (Ra-reactive factor serine protease p100) (RaRF) (Serine protease 5) [Cleaved into: Mannan-binding lectin serine protease 1 heavy chain; Mannan-bi…
D6RA03	RIMS2	Regulating synaptic membrane exocytosis protein 2
Q2M385	MPEG1	Macrophage-expressed gene 1 protein (Macrophage gene 1 protein) (Mpg-1)
H7C1W1	PXDN	Peroxidasin homolog (Fragment)
Q5VTT5	MYOM3	Myomesin-3 (Myomesin family member 3)
K7ERW7	SGK494	Uncharacterized serine/threonine-protein kinase SgK494 (Fragment)
A0A0A0MS07	IGHG1	Immunoglobulin heavy constant gamma 1 (Fragment)
J3KST0	CBLN2	Cerebellin-2
A4QPE4	SPTBN2	SPTBN2 protein (Spectrin beta chain, non-erythrocytic 2)
B4DN67	KIRREL1	Kin of IRRE-like protein 1 (cDNA FLJ56360, highly similar to Kin of IRRE-like protein 1)
O15520	FGF10	Fibroblast growth factor 10 (FGF-10) (Keratinocyte growth factor 2)
C9JC24	WDR48	WD repeat-containing protein 48 (Fragment)
P98077	SHC2	SHC-transforming protein 2 (Protein Sck) (SHC-transforming protein B) (Src homology 2 domain-containing-transforming protein C2) (SH2 domain protein C2)
J3QKT5	MSI2	RNA-binding protein Musashi homolog 2
C9JIR6	PPM1B	Protein phosphatase 1B (Fragment)
X1WI22	SAR1A	GTP-binding protein SAR1a (Fragment)
Q9UM73	ALK	ALK tyrosine kinase receptor (EC 2.7.10.1) (Anaplastic lymphoma kinase) (CD antigen CD246)
P30505	HLA-C	HLA class I histocompatibility antigen, Cw-8 alpha chain (MHC class I antigen Cw*8)
Q9UBW5	BIN2	Bridging integrator 2 (Breast cancer-associated protein 1)
F5GY87	PLEKHB1	Pleckstrin homology domain-containing family B member 1 (Fragment)
P09917	ALOX5	Arachidonate 5-lipoxygenase (5-LO) (5-lipoxygenase) (EC 1.13.11.34)
H0YHE8	PTPRB	Tyrosine-protein phosphatase (EC 3.1.3.48) (Fragment)
E5RFN6	ABCA10	ATP-binding cassette sub-family A member 10
Q8IUZ5	PHYKPL	5-phosphohydroxy-L-lysine phospho-lyase (EC 4.2.3.134) (Alanine--glyoxylate aminotransferase 2-like 2)
X6RDD7	ACBD5	Acyl-CoA-binding domain-containing protein 5 (Fragment)
Q8NHV4	NEDD1	Protein NEDD1 (Neural precursor cell expressed developmentally down-regulated protein 1) (NEDD-1)
Q9Y337	KLK5	Kallikrein-5 (EC 3.4.21.-) (Kallikrein-like protein 2) (KLK-L2) (Stratum corneum tryptic enzyme)
A0A1B0GUV4	MAGI2	Membrane-associated guanylate kinase, WW and PDZ domain-containing protein 2
Q16760	DGKD	Diacylglycerol kinase delta (DAG kinase delta) (EC 2.7.1.107) (130 kDa diacylglycerol kinase) (Diglyceride kinase delta) (DGK-delta)
Q9UKF6	CPSF3	Cleavage and polyadenylation specificity factor subunit 3 (EC 3.1.27.-) (Cleavage and polyadenylation specificity factor 73 kDa subunit) (CPSF 73 kDa subunit) (mRNA 3'-end-processing endonuclease CPSF-73)
F8W1G2	EGLN3	Egl nine homolog 3
H0Y827	FKBP10	Peptidylprolyl isomerase (EC 5.2.1.8) (Fragment)
Q96RR4	CAMKK2	Calcium/calmodulin-dependent protein kinase kinase 2 (CaM-KK 2) (CaM-kinase kinase 2) (CaMKK 2) (EC 2.7.11.17) (Calcium/calmodulin-dependent protein kinase kinase beta) (CaM-KK beta) (CaM-kinase kinase beta) (CaMKK beta)
E9PLN8		Uncharacterized protein (Fragment)
C9J4P8	FKBP9	Peptidylprolyl isomerase (EC 5.2.1.8) (Fragment)
Q29718	HLA-B	HLA class I histocompatibility antigen, B-82 alpha chain (MHC class I antigen B*82)
A0A1B0GU93	CHRNA7	Neuronal acetylcholine receptor subunit alpha-7
E7EX83	MAP4K4	Mitogen-activated protein kinase kinase kinase kinase 4
E9PK50	ABCC8	ATP-binding cassette sub-family C member 8
H3BSX1	SYT17	Synaptotagmin-17
Q5JQP4	POLL	DNA polymerase lambda
A0A1B0GW99		Deleted.
F6XE55	SMARCA2	Probable global transcription activator SNF2L2 (Fragment)
Q96AX2	RAB37	Ras-related protein Rab-37
Q01151	CD83	CD83 antigen (hCD83) (B-cell activation protein) (Cell surface protein HB15) (CD antigen CD83)
H3BM72	REXO5	RNA exonuclease 5 (Fragment)
H3BRE4	CLK3	Dual-specificity protein kinase CLK3 (Fragment)
Q9H9L3	ISG20L2	Interferon-stimulated 20 kDa exonuclease-like 2 (EC 3.1.-.-)
A0A140T9N4	HLA-DMA	HLA class II histocompatibility antigen, DM alpha chain (Fragment)
P83731	RPL24	60S ribosomal protein L24 (60S ribosomal protein L30) (Large ribosomal subunit protein eL24)
Q9H1H9	KIF13A	Kinesin-like protein KIF13A (Kinesin-like protein RBKIN)
Q05513	PRKCZ	Protein kinase C zeta type (EC 2.7.11.13) (nPKC-zeta)
Q5VVW5	SLC2A8	Solute carrier family 2, facilitated glucose transporter member 8
O60333	KIF1B	Kinesin-like protein KIF1B (Klp)
O00750	PIK3C2B	Phosphatidylinositol 4-phosphate 3-kinase C2 domain-containing subunit beta (PI3K-C2-beta) (PtdIns-3-kinase C2 subunit beta) (EC 2.7.1.154) (C2-PI3K) (Phosphoinositide 3-kinase-C2-beta)
Q6PCE3	PGM2L1	Glucose 1,6-bisphosphate synthase (EC 2.7.1.106) (PMMLP) (Phosphoglucomutase-2-like 1)
Q8NCW4	KLK3	Prostate-specific antigen
H3BMH1	CAPN3	Calpain-3 (Fragment)
Q9BXJ0	C1QTNF5	Complement C1q tumor necrosis factor-related protein 5
A0A087X0A8	COL12A1	Collagen alpha-1(XII) chain
H0Y793	MLH1	DNA mismatch repair protein Mlh1 (Fragment)
P05129	PRKCG	Protein kinase C gamma type (PKC-gamma) (EC 2.7.11.13)
P57729	RAB38	Ras-related protein Rab-38 (Melanoma antigen NY-MEL-1)
Q92743	HTRA1	Serine protease HTRA1 (EC 3.4.21.-) (High-temperature requirement A serine peptidase 1) (L56) (Serine protease 11)
B1AKC9	EPHB2	Ephrin type-B receptor 2
F6RH32	CACNA1B	Voltage-dependent N-type calcium channel subunit alpha
P05023	ATP1A1	Sodium/potassium-transporting ATPase subunit alpha-1 (Na(+)/K(+) ATPase alpha-1 subunit) (EC 3.6.3.9) (Sodium pump subunit alpha-1)
D6R9U9	ATP2C1	Calcium-transporting ATPase type 2C member 1 (Fragment)
Q8NFW1	COL22A1	Collagen alpha-1(XXII) chain
P31152	MAPK4	Mitogen-activated protein kinase 4 (MAP kinase 4) (MAPK 4) (EC 2.7.11.24) (Extracellular signal-regulated kinase 4) (ERK-4) (MAP kinase isoform p63) (p63-MAPK)
Q29940	HLA-B	HLA class I histocompatibility antigen, B-59 alpha chain (MHC class I antigen B*59)
A0A0A0MS16	KCNIP1	Kv channel-interacting protein 1
Q8IU80	TMPRSS6	Transmembrane protease serine 6 (EC 3.4.21.-) (Matriptase-2)
E9PDY6	MUC4	Mucin-4
P01766	IGHV3-13	Immunoglobulin heavy variable 3-13 (Ig heavy chain V-III region BRO)
A6NIM6	SLC15A5	Solute carrier family 15 member 5
Q96H35	RBM18	Probable RNA-binding protein 18 (RNA-binding motif protein 18)
E5RHK3	ARMC1	Armadillo repeat-containing protein 1 (Fragment)
Q9BYE2	TMPRSS13	Transmembrane protease serine 13 (EC 3.4.21.-) (Membrane-type mosaic serine protease) (Mosaic serine protease)
Q00889	PSG6	Pregnancy-specific beta-1-glycoprotein 6 (PS-beta-G-6) (PSBG-6) (Pregnancy-specific glycoprotein 6) (Pregnancy-specific beta-1-glycoprotein 10) (PS-beta-G-10) (PSBG-10) (Pregnancy-specific glycoprotein 10) (Pregnancy-specific beta-1-glycoprotein 12) (PS-beta-G-12) (PSBG-12) (Pregnancy-specific glycoprotein 12)
P13640	MT1G	Metallothionein-1G (MT-1G) (Metallothionein-1K) (MT-1K) (Metallothionein-IG) (MT-IG)
A0M8Q6	IGLC7	Immunoglobulin lambda constant 7 (Ig lambda-7 chain C region)
C9JSC3	NCKIPSD	NCK-interacting protein with SH3 domain (Fragment)
A0A1B0GUW5	RBMS3	RNA-binding motif, single-stranded-interacting protein 3 (Fragment)
Q9NYZ4	SIGLEC8	Sialic acid-binding Ig-like lectin 8 (Siglec-8) (Sialoadhesin family member 2) (SAF-2)
P55769	SNU13	NHP2-like protein 1 (High mobility group-like nuclear protein 2 homolog 1) (OTK27) (SNU13 homolog) (hSNU13) (U4/U6.U5 small nuclear ribonucleoprotein SNU13) (U4/U6.U5 tri-snRNP 15.5 kDa protein) [Cleaved into: NHP2-like protein 1, N-terminally processed]
Q6P5W5	SLC39A4	Zinc transporter ZIP4 (Solute carrier family 39 member 4) (Zrt- and Irt-like protein 4) (ZIP-4)
E9PQH6	RHOC	Rho-related GTP-binding protein RhoC (Fragment)
Q4G0X0	DMD	DMD protein (Dystrophin)
P49336	CDK8	Cyclin-dependent kinase 8 (EC 2.7.11.22) (EC 2.7.11.23) (Cell division protein kinase 8) (Mediator complex subunit CDK8) (Mediator of RNA polymerase II transcription subunit CDK8) (Protein kinase K35)
E9PKH0	PTPRC	Receptor-type tyrosine-protein phosphatase C (Fragment)
J3KRB3	RPL17	60S ribosomal protein L17 (Fragment)
Q6UY14	ADAMTSL4	ADAMTS-like protein 4 (ADAMTSL-4) (Thrombospondin repeat-containing protein 1)
Q8MH48	HLA-G	HLA class I histocompatibility antigen, alpha chain G (MHC class I antigen) (MHC class Ib antigen)
P26927	MST1	Hepatocyte growth factor-like protein (Macrophage stimulatory protein) (Macrophage-stimulating protein) (MSP) [Cleaved into: Hepatocyte growth factor-like protein alpha chain; Hepatocyte growth factor-like protein beta chain]
P30050	RPL12	60S ribosomal protein L12 (Large ribosomal subunit protein uL11)
I3L506	SCPEP1	Carboxypeptidase (EC 3.4.16.-) (Fragment)
Q6PIL6	KCNIP4	Kv channel-interacting protein 4 (KChIP4) (A-type potassium channel modulatory protein 4) (Calsenilin-like protein) (Potassium channel-interacting protein 4)
O95069	KCNK2	Potassium channel subfamily K member 2 (Outward rectifying potassium channel protein TREK-1) (TREK-1 K(+) channel subunit) (Two pore domain potassium channel TREK-1) (Two pore potassium channel TPKC1)
P08174	CD55	Complement decay-accelerating factor (CD antigen CD55)
O75077	ADAM23	Disintegrin and metalloproteinase domain-containing protein 23 (ADAM 23) (Metalloproteinase-like, disintegrin-like, and cysteine-rich protein 3) (MDC-3)
J3KPQ4	ARHGAP9	Rho GTPase activating protein 9, isoform CRA_a (Rho GTPase-activating protein 9)
P28370	SMARCA1	Probable global transcription activator SNF2L1 (EC 3.6.4.-) (ATP-dependent helicase SMARCA1) (Nucleosome-remodeling factor subunit SNF2L) (SWI/SNF-related matrix-associated actin-dependent regulator of chromatin subfamily A member 1)
Q9H9Z2	LIN28A	Protein lin-28 homolog A (Lin-28A) (Zinc finger CCHC domain-containing protein 1)
G3V2X9	ACTN1	Alpha-actinin-1 (Fragment)
Q86WH2	RASSF3	Ras association domain-containing protein 3
Q9ULI0	ATAD2B	ATPase family AAA domain-containing protein 2B
A0A0A0MRG2	APP	Amyloid-beta A4 protein
A0A096LNY0	ARHGEF9	Rho guanine nucleotide exchange factor 9 (Fragment)
Q9Y3R0	GRIP1	Glutamate receptor-interacting protein 1 (GRIP-1)
A0A075B6Q0	RAP1A	Ras-related protein Rap-1A (Fragment)
K7ERP6	PRKACA	cAMP-dependent protein kinase catalytic subunit alpha (Fragment)
Q5VWU8	PARD3	Partitioning defective 3 homolog
H0YBB2	COL14A1	Collagen alpha-1(XIV) chain (Fragment)
A0A0D9SEN2	CDK11B	Cyclin-dependent kinase 11B
O95185	UNC5C	Netrin receptor UNC5C (Protein unc-5 homolog 3) (Protein unc-5 homolog C)
P35568	IRS1	Insulin receptor substrate 1 (IRS-1)
Q5JWQ4	NRP1	Neuropilin-1
Q96HF1	SFRP2	Secreted frizzled-related protein 2 (FRP-2) (sFRP-2) (Secreted apoptosis-related protein 1) (SARP-1)
A0A0G2JNN7	TPO	Thyroid peroxidase
A0A087WZT9	PSKH1	Serine/threonine-protein kinase H1
A0A075B6K2	IGLV3-12	Immunoglobulin lambda variable 3-12
E9PS75	MACF1	Microtubule-actin cross-linking factor 1, isoforms 1/2/3/5 (Fragment)
A0A0J9YW53	OVOS	Uncharacterized protein
Q8IWT1	SCN4B	Sodium channel subunit beta-4
H0YKB1	TJP1	Tight junction protein 1 (Zona occludens 1), isoform CRA_d (Tight junction protein ZO-1)
F8W043	ACTR6	Actin-related protein 6
P37173	TGFBR2	TGF-beta receptor type-2 (TGFR-2) (EC 2.7.11.30) (TGF-beta type II receptor) (Transforming growth factor-beta receptor type II) (TGF-beta receptor type II) (TbetaR-II)
Q6YHK3	CD109	CD109 antigen (150 kDa TGF-beta-1-binding protein) (C3 and PZP-like alpha-2-macroglobulin domain-containing protein 7) (Platelet-specific Gov antigen) (p180) (r150) (CD antigen CD109)
Q5JUW8	DLG3	Discs, large homolog 3 (Neuroendocrine-dlg, Drosophila), isoform CRA_b (Disks large homolog 3)
I3L514	P4HB	Protein disulfide-isomerase
F5H1T4	ERBB2	Receptor tyrosine-protein kinase erbB-2
F6S6P2	BAG6	Large proline-rich protein BAG6 (Fragment)
H7C5C9	PCCB	Propionyl-CoA carboxylase beta chain, mitochondrial (Fragment)
A0A0G2JMB4	TRBC2	T-cell receptor beta-2 chain C region (Fragment)
V9GYL7	NRP1	Neuropilin-1 (Fragment)
H0Y6B2	SUSD1	Sushi domain-containing protein 1 (Fragment)
R4GMM8	ROBO2	Roundabout homolog 2 (Fragment)
Q96J66	ABCC11	ATP-binding cassette sub-family C member 11 (Multidrug resistance-associated protein 8)
A0A0A0MQX5	CNTN5	Contactin-5
Q5T0B5	MUSK	Muscle, skeletal receptor tyrosine-protein kinase
D6RBK0	PHB	Prohibitin (Fragment)
H7C4F6	KPNA4	Importin subunit alpha-3 (Fragment)
Q03013	GSTM4	Glutathione S-transferase Mu 4 (EC 2.5.1.18) (GST class-mu 4) (GST-Mu2) (GSTM4-4)
P02452	COL1A1	Collagen alpha-1(I) chain (Alpha-1 type I collagen)
E7EX53	RPL15	Ribosomal protein L15 (Fragment)
K7EP59	STK11	Serine/threonine-protein kinase STK11
P49411	TUFM	Elongation factor Tu, mitochondrial (EF-Tu) (P43)
J3QQV2	SLC16A3	Monocarboxylate transporter 4 (Fragment)
A0A096LNJ3	LOC646743	Uncharacterized protein
H0YIL2	RBM19	Probable RNA-binding protein 19 (Fragment)
Q5JSJ4	INTS6L	Integrator complex subunit 6-like (Protein DDX26B)
P17482	HOXB9	Homeobox protein Hox-B9 (Homeobox protein Hox-2.5) (Homeobox protein Hox-2E)
F5H0Z3	LRP6	Low-density lipoprotein receptor-related protein 6 (Fragment)
O95835	LATS1	Serine/threonine-protein kinase LATS1 (EC 2.7.11.1) (Large tumor suppressor homolog 1) (WARTS protein kinase) (h-warts)
B7ZCA0	SYNGAP1	Ras/Rap GTPase-activating protein SynGAP (Fragment)
A0A140TA29	C4B	Complement C4-B
A0A0G2JID9	AGER	Advanced glycosylation end product-specific receptor
P08631	HCK	Tyrosine-protein kinase HCK (EC 2.7.10.2) (Hematopoietic cell kinase) (Hemopoietic cell kinase) (p59-HCK/p60-HCK) (p59Hck) (p61Hck)
P01024	C3	Complement C3 (C3 and PZP-like alpha-2-macroglobulin domain-containing protein 1) [Cleaved into: Complement C3 beta chain; C3-beta-c (C3bc); Complement C3 alpha chain; C3a anaphylatoxin; Acylation stimulating protein (ASP) (C3adesArg); Complement C3b alpha' chain; Complement C3c alpha' chain fragment 1; Complement C3dg fragment; Complement C3g fragment; Complement C3d fragment; Complement C3f fra…
O15072	ADAMTS3	A disintegrin and metalloproteinase with thrombospondin motifs 3 (ADAM-TS 3) (ADAM-TS3) (ADAMTS-3) (EC 3.4.24.-) (Procollagen II N-proteinase) (PC II-NP) (Procollagen II amino propeptide-processing enzyme)
Q8WVV9	HNRNPLL	Heterogeneous nuclear ribonucleoprotein L-like (hnRNPLL) (Stromal RNA-regulating factor)
P78325	ADAM8	Disintegrin and metalloproteinase domain-containing protein 8 (ADAM 8) (EC 3.4.24.-) (Cell surface antigen MS2) (CD antigen CD156a)
D6RBU4	PPIP5K2	Inositol hexakisphosphate and diphosphoinositol-pentakisphosphate kinase 2 (Fragment)
A0A087WZR0	PCSK6	Proprotein convertase subtilisin/kexin type 6
Q13188	STK3	Serine/threonine-protein kinase 3 (EC 2.7.11.1) (Mammalian STE20-like protein kinase 2) (MST-2) (STE20-like kinase MST2) (Serine/threonine-protein kinase Krs-1) [Cleaved into: Serine/threonine-protein kinase 3 36kDa subunit (MST2/N); Serine/threonine-protein kinase 3 20kDa subunit (MST2/C)]
Q9Y624	F11R	Junctional adhesion molecule A (JAM-A) (Junctional adhesion molecule 1) (JAM-1) (Platelet F11 receptor) (Platelet adhesion molecule 1) (PAM-1) (CD antigen CD321)
J3KPG5	BAZ2A	Bromodomain adjacent to zinc finger domain protein 2A
A0A087WVY2	MPP2	MAGUK p55 subfamily member 2 (Fragment)
H0YMF9	WDR61	WD repeat-containing protein 61
H0YAK9	NPNT	Nephronectin (Fragment)
P61204	ARF3	ADP-ribosylation factor 3
Q5ST52	C2	Complement C2 (Fragment)
Q9HBW9	ADGRL4	Adhesion G protein-coupled receptor L4 (EGF, latrophilin and seven transmembrane domain-containing protein 1) (EGF-TM7-latrophilin-related protein) (ETL protein)
P01859	IGHG2	Immunoglobulin heavy constant gamma 2 (Ig gamma-2 chain C region) (Ig gamma-2 chain C region DOT) (Ig gamma-2 chain C region TIL) (Ig gamma-2 chain C region ZIE)
Q15238	PSG5	Pregnancy-specific beta-1-glycoprotein 5 (PS-beta-G-5) (PSBG-5) (Pregnancy-specific glycoprotein 5) (Fetal liver non-specific cross-reactive antigen 3) (FL-NCA-3)
F8VU39	BAZ2A	Bromodomain adjacent to zinc finger domain protein 2A
Q9NY56	OBP2A	Odorant-binding protein 2a (Odorant-binding protein IIa) (OBPIIa)
A0A0G2JMG7		Deleted.
Q9H4B0	OSGEPL1	Probable tRNA N6-adenosine threonylcarbamoyltransferase, mitochondrial (EC 2.3.1.234) (N6-L-threonylcarbamoyladenine synthase) (t(6)A synthase) (O-sialoglycoprotein endopeptidase-like protein 1) (t(6)A37 threonylcarbamoyladenosine biosynthesis protein OSGEPL1) (tRNA threonylcarbamoyladenosine biosynthesis protein OSGEPL1)
Q96ES6	MFSD3	Major facilitator superfamily domain-containing protein 3
E7EPN2	DDR1	Epithelial discoidin domain-containing receptor 1 (Fragment)
P49189	ALDH9A1	4-trimethylaminobutyraldehyde dehydrogenase (TMABADH) (EC 1.2.1.47) (Aldehyde dehydrogenase E3 isozyme) (Aldehyde dehydrogenase family 9 member A1) (EC 1.2.1.3) (Gamma-aminobutyraldehyde dehydrogenase) (EC 1.2.1.19) (R-aminobutyraldehyde dehydrogenase) [Cleaved into: 4-trimethylaminobutyraldehyde dehydrogenase, N-terminally processed]
P16190	HLA-A	HLA class I histocompatibility antigen, A-33 alpha chain (Aw-19) (Aw-33) (MHC class I antigen A*33)
Q13952	NFYC	Nuclear transcription factor Y subunit gamma (CAAT box DNA-binding protein subunit C) (Nuclear transcription factor Y subunit C) (NF-YC) (Transactivator HSM-1/2)
Q9P0K1	ADAM22	Disintegrin and metalloproteinase domain-containing protein 22 (ADAM 22) (Metalloproteinase-disintegrin ADAM22-3) (Metalloproteinase-like, disintegrin-like, and cysteine-rich protein 2)
Q5JX55	CPNE1	Copine-1 (Fragment)
H3BTI1	DOC2A	Double C2-like domain-containing protein alpha (Fragment)
E9PQM1	CTSB	Cathepsin B (Fragment)
O19617	HLA-C	HLA class I antigen (HLA class I histocompatibility antigen, Cw-6 alpha chain) (HLA-C protein) (MHC class I antigen) (Major histocompatibility complex, class I, C)
Q92997	DVL3	Segment polarity protein dishevelled homolog DVL-3 (Dishevelled-3) (DSH homolog 3)
A0A0B4J2B6	IGHV2OR16-5	Immunoglobulin heavy variable 2/OR16-5 (non-functional) (Fragment)
P01892	HLA-A	HLA class I histocompatibility antigen, A-2 alpha chain (MHC class I antigen A*2)
A0A140T9B0	HLA-DQB2	HLA class II histocompatibility antigen, DQ beta 2 chain (Fragment)
A0A087WWI5	ANK3	Ankyrin-3 (Fragment)
Q8NHQ8	RASSF8	Ras association domain-containing protein 8 (Carcinoma-associated protein HOJ-1)
O15165	LDLRAD4	Low-density lipoprotein receptor class A domain-containing protein 4
Q09160	HLA-A	HLA class I histocompatibility antigen, A-80 alpha chain (Aw-80) (HLA class I histocompatibility antigen, A-1 alpha chain) (MHC class I antigen A*80)
Q5QP02	HAO2	Hydroxyacid oxidase 2 (Fragment)
P02489	CRYAA	Alpha-crystallin A chain (Heat shock protein beta-4) (HspB4) [Cleaved into: Alpha-crystallin A(1-172); Alpha-crystallin A(1-168); Alpha-crystallin A(1-162)]
E2QRG7	COQ2	4-hydroxybenzoate polyprenyltransferase, mitochondrial (4-HB polyprenyltransferase) (EC 2.5.1.39) (4-hydroxybenzoate decaprenyltransferase) (Para-hydroxybenzoate--polyprenyltransferase) (PHB:PPT) (PHB:polyprenyltransferase)
P19105	MYL12A	Myosin regulatory light chain 12A (Epididymis secretory protein Li 24) (HEL-S-24) (MLC-2B) (Myosin RLC) (Myosin regulatory light chain 2, nonsarcomeric) (Myosin regulatory light chain MRLC3)
D2WEZ3	NOTCH2	Neurogenic locus notch homolog protein 2 (Neurogenic locus notch-like protein 2)
A0A0J9YWY2	OVOS	Uncharacterized protein
Q8NHY2	COP1	E3 ubiquitin-protein ligase COP1 (EC 2.3.2.27) (Constitutive photomorphogenesis protein 1 homolog) (hCOP1) (RING finger and WD repeat domain protein 2) (RING finger protein 200) (RING-type E3 ubiquitin transferase RFWD2)
A0A0A0MT10	BIN2	Bridging integrator 2 (Fragment)
Q9NUP9	LIN7C	Protein lin-7 homolog C (Lin-7C) (Mammalian lin-seven protein 3) (MALS-3) (Vertebrate lin-7 homolog 3) (Veli-3)
B8ZZU1	CHN2	Beta-chimaerin (Fragment)
Q9UGQ3	SLC2A6	Solute carrier family 2, facilitated glucose transporter member 6 (Glucose transporter type 6) (GLUT-6) (Glucose transporter type 9) (GLUT-9)
H0YJJ2	TDRD9	ATP-dependent RNA helicase TDRD9 (Fragment)
I3L2R4	SLC2A4	Solute carrier family 2 (Facilitated glucose transporter), member 4, isoform CRA_b (Solute carrier family 2, facilitated glucose transporter member 4)
H3BUM9	CSK	Tyrosine-protein kinase CSK (Fragment)
Q9NP87	POLM	DNA-directed DNA/RNA polymerase mu (Pol Mu) (EC 2.7.7.7) (Terminal transferase)
A0A0G2JPB1	HLA-C	HLA class I histocompatibility antigen, Cw-6 alpha chain
P30414	NKTR	NK-tumor recognition protein (NK-TR protein) (Natural-killer cells cyclophilin-related protein) [Includes: Putative peptidyl-prolyl cis-trans isomerase (PPIase) (EC 5.2.1.8) (Rotamase)]
H3BMM9	RNPS1	RNA-binding protein with serine-rich domain 1 (Fragment)
Q96FX2	DPH3	DPH3 homolog (CSL-type zinc finger-containing protein 2) (DelGEF-interacting protein 1) (DelGIP1)
F5H793	LDHB	L-lactate dehydrogenase B chain (Fragment)
I3L2J2	UMOD	Uromodulin (Fragment)
E9PJF0	MAPK3	Mitogen-activated protein kinase (EC 2.7.11.24)
A0A140T9H9	HLA-DQB1	HLA class II histocompatibility antigen, DQ beta 1 chain (Fragment)
H7C4B3	ADAP1	Arf-GAP with dual PH domain-containing protein 1 (Fragment)
H3BV67	DOK4	Docking protein 4 (Fragment)
B3KVK2	GNB1	Guanine nucleotide-binding protein G(I)/G(S)/G(T) subunit beta-1 (cDNA FLJ16663 fis, clone THYMU2005759, highly similar to Guanine nucleotide-binding proteinG(I)/G(S)/G(T) subunit beta 1)
H0YMJ4	KIF23	Kinesin-like protein KIF23
A6PVV2	WNK2	Serine/threonine-protein kinase WNK2 (Fragment)
J3QQQ8	BPTF	Nucleosome-remodeling factor subunit BPTF (Fragment)
O15381	NVL	Nuclear valosin-containing protein-like (NVLp) (Nuclear VCP-like protein)
P35556	FBN2	Fibrillin-2 [Cleaved into: Fibrillin-2 C-terminal peptide]
P02747	C1QC	Complement C1q subcomponent subunit C
O15524	SOCS1	Suppressor of cytokine signaling 1 (SOCS-1) (JAK-binding protein) (JAB) (STAT-induced STAT inhibitor 1) (SSI-1) (Tec-interacting protein 3) (TIP-3)
Q15842	KCNJ8	ATP-sensitive inward rectifier potassium channel 8 (Inward rectifier K(+) channel Kir6.1) (Potassium channel, inwardly rectifying subfamily J member 8) (uKATP-1)
Q16513	PKN2	Serine/threonine-protein kinase N2 (EC 2.7.11.13) (PKN gamma) (Protein kinase C-like 2) (Protein-kinase C-related kinase 2)
A0A087WV01	EEF1A1	Elongation factor 1-alpha
A0A0G2JNX5	CHRFAM7A	CHRNA7-FAM7A fusion protein
H0YGH5	ACACB	Acetyl-CoA carboxylase 2 (Fragment)
A0A140T9I0	HLA-A	HLA class I histocompatibility antigen, A-3 alpha chain (Fragment)
Q9GJ45	HLA-A	HLA class I histocompatibility antigen, A-3 alpha chain (MHC class I antigen)
Q14137	BOP1	Ribosome biogenesis protein BOP1 (Block of proliferation 1 protein)
F5GYP8	RASSF8	Ras association domain-containing protein 8 (Fragment)
K7EQX4	CIRBP	Cold-inducible RNA-binding protein (Fragment)
P78314	SH3BP2	SH3 domain-binding protein 2 (3BP-2)
Q93084	ATP2A3	Sarcoplasmic/endoplasmic reticulum calcium ATPase 3 (SERCA3) (SR Ca(2+)-ATPase 3) (EC 3.6.3.8) (Calcium pump 3)
P30453	HLA-A	HLA class I histocompatibility antigen, A-34 alpha chain (Aw-34) (HLA class I histocompatibility antigen, A-10 alpha chain) (MHC class I antigen A*34)
Q8NI36	WDR36	WD repeat-containing protein 36 (T-cell activation WD repeat-containing protein) (TA-WDRP)
Q53EL9	SEZ6	Seizure protein 6 homolog (SEZ-6) (hSEZ-6)
D6RIS6	PGM3	Phosphoacetylglucosamine mutase (Fragment)
A0A087WW74	SASH1	SAM and SH3 domain-containing protein 1
P01130	LDLR	Low-density lipoprotein receptor (LDL receptor)
A0A0G2JK28	C2	Complement C2 (Fragment)
H7C523	HHLA2	HERV-H LTR-associating protein 2 (Fragment)
Q8TC94	ACTL9	Actin-like protein 9
P55268	LAMB2	Laminin subunit beta-2 (Laminin B1s chain) (Laminin-11 subunit beta) (Laminin-14 subunit beta) (Laminin-15 subunit beta) (Laminin-3 subunit beta) (Laminin-4 subunit beta) (Laminin-7 subunit beta) (Laminin-9 subunit beta) (S-laminin subunit beta) (S-LAM beta)
Q8TF08	COX7B2	Cytochrome c oxidase subunit 7B2, mitochondrial (Cytochrome c oxidase polypeptide VIIb2)
D6RE65	CAMK4	Calcium/calmodulin-dependent protein kinase type IV (Fragment)
P08319	ADH4	Alcohol dehydrogenase 4 (EC 1.1.1.1) (Alcohol dehydrogenase class II pi chain)
J3KPY9	ANTXR2	Anthrax toxin receptor 2
B1AJS0	PTPRT	Receptor-type tyrosine-protein phosphatase T
Q8N7X1	RBMXL3	RNA-binding motif protein, X-linked-like-3
J3KTJ8	RPL26	60S ribosomal protein L26 (Fragment)
A8MYU2	KCNU1	Potassium channel subfamily U member 1 (Calcium-activated potassium channel subunit alpha-3) (Calcium-activated potassium channel, subfamily M subunit alpha-3) (KCa5) (Slowpoke homolog 3)
D6R9B3	ABCC10	Multidrug resistance-associated protein 7 (Fragment)
H0YF95	SEZ6	Seizure protein 6 homolog (Fragment)
B1AHM9	FBLN1	Fibulin-1 (Fragment)
E5RIF6	HAVCR1	Hepatitis A virus cellular receptor 1 (Fragment)
Q96A83	COL26A1	Collagen alpha-1(XXVI) chain (Alpha-1 type XXVI collagen) (EMI domain-containing protein 2) (Emilin and multimerin domain-containing protein 2) (Emu2)
H0YMG7	ALDH1A2	Retinal dehydrogenase 2
Q92956	TNFRSF14	Tumor necrosis factor receptor superfamily member 14 (Herpes virus entry mediator A) (Herpesvirus entry mediator A) (HveA) (Tumor necrosis factor receptor-like 2) (TR2) (CD antigen CD270)
Q5GAN4	RNASE12	Probable inactive ribonuclease-like protein 12
F2Z349	PAEP	Glycodelin
C9J4X2	NONO	Non-POU domain-containing octamer-binding protein (Fragment)
O75449	KATNA1	Katanin p60 ATPase-containing subunit A1 (Katanin p60 subunit A1) (EC 3.6.4.3) (p60 katanin)
K7EPB7	TXNL1	Thioredoxin-like protein 1
Q5SYZ4	CRABP2	Cellular retinoic acid-binding protein 2 (Fragment)
F8VV32	LYZ	Lysozyme (EC 3.2.1.17)
U3KQ41	CTSA	Lysosomal protective protein (Fragment)
Q16548	BCL2A1	Bcl-2-related protein A1 (Bcl-2-like protein 5) (Bcl2-L-5) (Hemopoietic-specific early response protein) (Protein BFL-1) (Protein GRS)
Q5JT88	SHPRH	E3 ubiquitin-protein ligase SHPRH (Fragment)
A0A087WZ38	PDCD6	Programmed cell death protein 6
Q5TBH0	NEK6	Serine/threonine-protein kinase Nek6 (Fragment)
P60827	C1QTNF8	Complement C1q tumor necrosis factor-related protein 8 (C1q/TNF-related protein 8) (CTRP8)
A0A0B4J248	TRAV1-1	T cell receptor alpha variable 1-1
Q13087	PDIA2	Protein disulfide-isomerase A2 (EC 5.3.4.1) (Pancreas-specific protein disulfide isomerase) (PDIp)
E7ETM0	CSNK1A1	Casein kinase I isoform alpha
F5H369	PIK3C2G	Phosphatidylinositol 4-phosphate 3-kinase C2 domain-containing subunit gamma
Q9UKF5	ADAM29	Disintegrin and metalloproteinase domain-containing protein 29 (ADAM 29) (Cancer/testis antigen 73) (CT73)
F8W8C9	VPREB1	Immunoglobulin iota chain
H7BXU9	FGFR2	Receptor protein-tyrosine kinase (EC 2.7.10.1) (Fragment)
H0Y7A5	GTPBP2	GTP-binding protein 2 (Fragment)
O95259	KCNH1	Potassium voltage-gated channel subfamily H member 1 (Ether-a-go-go potassium channel 1) (EAG channel 1) (h-eag) (hEAG1) (Voltage-gated potassium channel subunit Kv10.1)
P56199	ITGA1	Integrin alpha-1 (CD49 antigen-like family member A) (Laminin and collagen receptor) (VLA-1) (CD antigen CD49a)
A0A087X232	C1S	Complement C1s subcomponent
M0R268	SNRPA	U1 small nuclear ribonucleoprotein A (Fragment)
P04731	MT1A	Metallothionein-1A (MT-1A) (Metallothionein-IA) (MT-IA)
Q9H987	SYNPO2L	Synaptopodin 2-like protein
Q9Y680	FKBP7	Peptidyl-prolyl cis-trans isomerase FKBP7 (PPIase FKBP7) (EC 5.2.1.8) (23 kDa FK506-binding protein) (23 kDa FKBP) (FKBP-23) (FK506-binding protein 7) (FKBP-7) (Rotamase)
A0A075B6F4	TRBV21OR9-2	T cell receptor beta variable 21/OR9-2 (pseudogene) (Fragment)
A0A087WZH6	CHRDL2	Chordin-like protein 2
P35637	FUS	RNA-binding protein FUS (75 kDa DNA-pairing protein) (Oncogene FUS) (Oncogene TLS) (POMp75) (Translocated in liposarcoma protein)
F8VP47	RPH3A	Rabphilin-3A
Q96QE3	ATAD5	ATPase family AAA domain-containing protein 5 (Chromosome fragility-associated gene 1 protein)
H7C5L0	PTK7	Inactive tyrosine-protein kinase 7 (Fragment)
Q6H3X3	RAET1G	UL-16 binding protein 5 (Retinoic acid early transcript 1G protein)
P16278	GLB1	Beta-galactosidase (EC 3.2.1.23) (Acid beta-galactosidase) (Lactase) (Elastin receptor 1)
Q9BZ11	ADAM33	Disintegrin and metalloproteinase domain-containing protein 33 (ADAM 33) (EC 3.4.24.-)
J3KS83	SKAP1	Src kinase-associated phosphoprotein 1 (Fragment)
B7Z7U4	NTRK3	Tyrosine-protein kinase receptor (EC 2.7.10.1)
G3V5B3	ERO1A	ERO1-like protein alpha (Fragment)
H0YM22	GLDN	Gliomedin (Fragment)
Q8TDX7	NEK7	Serine/threonine-protein kinase Nek7 (EC 2.7.11.1) (Never in mitosis A-related kinase 7) (NimA-related protein kinase 7)
Q96RU7	TRIB3	Tribbles homolog 3 (TRB-3) (Neuronal cell death-inducible putative kinase) (SINK) (p65-interacting inhibitor of NF-kappa-B)
P04626	ERBB2	Receptor tyrosine-protein kinase erbB-2 (EC 2.7.10.1) (Metastatic lymph node gene 19 protein) (MLN 19) (Proto-oncogene Neu) (Proto-oncogene c-ErbB-2) (Tyrosine kinase-type cell surface receptor HER2) (p185erbB2) (CD antigen CD340)
H7BYW5	PRKAR1B	cAMP-dependent protein kinase type I-beta regulatory subunit (Fragment)
P43699	NKX2-1	Homeobox protein Nkx-2.1 (Homeobox protein NK-2 homolog A) (Thyroid nuclear factor 1) (Thyroid transcription factor 1) (TTF-1) (Thyroid-specific enhancer-binding protein) (T/EBP)
P26583	HMGB2	High mobility group protein B2 (High mobility group protein 2) (HMG-2)
F5H532	NOL8	Nucleolar protein 8
E7EVQ5	CTHRC1	Collagen triple helix repeat-containing protein 1
F5H483	SLC24A1	Sodium/potassium/calcium exchanger 1
J3KS52	CD300LF	CMRF35-like molecule 1
Q0P5N6	ARL16	ADP-ribosylation factor-like protein 16
Q7LBR1	CHMP1B	Charged multivesicular body protein 1b (CHMP1.5) (Chromatin-modifying protein 1b) (CHMP1b) (Vacuolar protein sorting-associated protein 46-2) (Vps46-2) (hVps46-2)
H7C4T9	SLC22A23	Solute carrier family 22 member 23 (Fragment)
Q13595	TRA2A	Transformer-2 protein homolog alpha (TRA-2 alpha) (TRA2-alpha) (Transformer-2 protein homolog A)
A0A140TA43	COL11A2	COL11A2 (Collagen alpha-2(XI) chain)
A0A140T9S2	HLA-DQB2	HLA class II histocompatibility antigen, DQ beta 2 chain (Fragment)
H7C3K8	ARHGAP4	Rho GTPase-activating protein 4 (Fragment)
F5H7G1	C8B	Complement component C8 beta chain
A6NJS3		Deleted.
Q86VH2	KIF27	Kinesin-like protein KIF27
J3QQL4	KSR1	Kinase suppressor of Ras 1 (Fragment)
O15350	TP73	Tumor protein p73 (p53-like transcription factor) (p53-related protein)
O14807	MRAS	Ras-related protein M-Ras (Ras-related protein R-Ras3)
H3BTC4	MT1H	Metallothionein
P30456	HLA-A	HLA class I histocompatibility antigen, A-43 alpha chain (Aw-43) (MHC class I antigen A*43)
I3L4G8	CHMP6	Charged multivesicular body protein 6 (Fragment)
B1AKF7	ENOX2	Ecto-NOX disulfide-thiol exchanger 2 (Fragment)
A0A0J9YXJ0	CELF2	CUGBP Elav-like family member 2
Q15759	MAPK11	Mitogen-activated protein kinase 11 (MAP kinase 11) (MAPK 11) (EC 2.7.11.24) (Mitogen-activated protein kinase p38 beta) (MAP kinase p38 beta) (p38b) (Stress-activated protein kinase 2b) (SAPK2b) (p38-2)
C9JEG4	MYL7	Myosin regulatory light chain 2, atrial isoform (Myosin, light polypeptide 7, regulatory)
A0A0J9YXT0	ARL6	ADP-ribosylation factor-like protein 6 (Fragment)
H3BSS0	MT1G	Metallothionein
G3V393	PNP	Purine nucleoside phosphorylase (Fragment)
A0A075B6K5	IGLV3-9	Immunoglobulin lambda variable 3-9
E7EUI5	ADAM17	Disintegrin and metalloproteinase domain-containing protein 17
P30530	AXL	Tyrosine-protein kinase receptor UFO (EC 2.7.10.1) (AXL oncogene)
D6RBZ0	HNRNPAB	Heterogeneous nuclear ribonucleoprotein A/B
Q5TCP6	HMCN1	Hemicentin-1 (Fragment)
P36402	TCF7	Transcription factor 7 (TCF-7) (T-cell-specific transcription factor 1) (T-cell factor 1) (TCF-1)
E9PRA8	CRYAB	Alpha-crystallin B chain
K7EP90	RBM42	RNA-binding protein 42
Q16512	PKN1	Serine/threonine-protein kinase N1 (EC 2.7.11.13) (Protease-activated kinase 1) (PAK-1) (Protein kinase C-like 1) (Protein kinase C-like PKN) (Protein kinase PKN-alpha) (Protein-kinase C-related kinase 1) (Serine-threonine protein kinase N)
X6RAY8	MRPL4	39S ribosomal protein L4, mitochondrial
Q9NYL2	MAP3K20	Mitogen-activated protein kinase kinase kinase 20 (EC 2.7.11.25) (Human cervical cancer suppressor gene 4 protein) (HCCS-4) (Leucine zipper- and sterile alpha motif-containing kinase) (MLK-like mitogen-activated protein triple kinase) (Mitogen-activated protein kinase kinase kinase MLT) (Mixed lineage kinase-related kinase) (MLK-related kinase) (MRK) (Sterile alpha motif- and leucine zipper-conta…
E9PAQ1	CFP	Properdin
Q8NFF2	SLC24A4	Sodium/potassium/calcium exchanger 4 (Na(+)/K(+)/Ca(2+)-exchange protein 4) (Solute carrier family 24 member 4)
P98160	HSPG2	Basement membrane-specific heparan sulfate proteoglycan core protein (HSPG) (Perlecan) (PLC) [Cleaved into: Endorepellin; LG3 peptide]
Q969Q0	RPL36AL	60S ribosomal protein L36a-like (Large ribosomal subunit protein eL42-like)
E7EWW9	GSTM1	Glutathione S-transferase Mu 1
C9JBG0	RAB34	Ras-related protein Rab-34, isoform NARR (Fragment)
Q13433	SLC39A6	Zinc transporter ZIP6 (Estrogen-regulated protein LIV-1) (Solute carrier family 39 member 6) (Zrt- and Irt-like protein 6) (ZIP-6)
Q15717	ELAVL1	ELAV-like protein 1 (Hu-antigen R) (HuR)
A0A1B0GTX1	DNMBP	Dynamin-binding protein
Q68G74	LHX8	LIM/homeobox protein Lhx8 (LIM homeobox protein 8)
E5RJS3	GABRA1	Gamma-aminobutyric acid receptor subunit alpha-1 (Fragment)
K7ENJ4	ATP5F1A	ATP synthase subunit alpha, mitochondrial (Fragment)
O60563	CCNT1	Cyclin-T1 (CycT1) (Cyclin-T)
H7C5A5	STIM2	Stromal interaction molecule 2
P43235	CTSK	Cathepsin K (EC 3.4.22.38) (Cathepsin O) (Cathepsin O2) (Cathepsin X)
H0Y4C9	COL21A1	Collagen alpha-1(XXI) chain (Fragment)
P54886	ALDH18A1	Delta-1-pyrroline-5-carboxylate synthase (P5CS) (Aldehyde dehydrogenase family 18 member A1) [Includes: Glutamate 5-kinase (GK) (EC 2.7.2.11) (Gamma-glutamyl kinase); Gamma-glutamyl phosphate reductase (GPR) (EC 1.2.1.41) (Glutamate-5-semialdehyde dehydrogenase) (Glutamyl-gamma-semialdehyde dehydrogenase)]
A6NL68	SLC2A1	Solute carrier family 2, facilitated glucose transporter member 1 (Fragment)
E9PLP5	SAMD12	Sterile alpha motif domain-containing protein 12 (Fragment)
Q4VXP6	KCNQ2	Potassium voltage-gated channel subfamily KQT member 2
A0A087WUZ2	FCGBP	IgGFc-binding protein
G3V4C1	HNRNPC	Heterogeneous nuclear ribonucleoproteins C1/C2
J3QRN2	APOH	Beta-2-glycoprotein 1 (Fragment)
B4DV12	UBB	Polyubiquitin-B (cDNA FLJ51326, highly similar to Homo sapiens ubiquitin B (UBB), mRNA)
B4DN26	PLAT	Tissue-type plasminogen activator (cDNA FLJ59355, highly similar to Tissue-type plasminogen activator (EC 3.4.21.68))
F5H0R6	PLEKHB1	Pleckstrin homology domain-containing family B member 1 (Fragment)
A0A1B0GVW8	UNC13B	Protein unc-13 homolog B
Q15269	PWP2	Periodic tryptophan protein 2 homolog
G3V1U3	METAP2	Methionine aminopeptidase 2 (Methionyl aminopeptidase 2, isoform CRA_c)
F5H5P4	VAV1	Proto-oncogene vav
P83105	HTRA4	Serine protease HTRA4 (EC 3.4.21.-) (High-temperature requirement factor A4)
H0YAN7	MICU3	Calcium uptake protein 3, mitochondrial (Fragment)
A0JD32	TRAV38-2DV8	T cell receptor alpha variable 38-2/delta variable 8
B3KT41	SV2C	Synaptic vesicle glycoprotein 2C (cDNA FLJ37598 fis, clone BRCOC2008642, highly similar to Synaptic vesicle glycoprotein 2C)
A0A140T9E9	BRD2	Bromodomain-containing protein 2 (Fragment)
H0Y9Q0	MTRR	Methionine synthase reductase (Fragment)
K7ENT1	ADAP2	Arf-GAP with dual PH domain-containing protein 2 (Fragment)
J3QLV6	CORO6	Coronin
B4E3S0	CORO1C	Coronin
U3KQV5	GZMM	Granzyme M
O60706	ABCC9	ATP-binding cassette sub-family C member 9 (Sulfonylurea receptor 2)
Q9Y320	TMX2	Thioredoxin-related transmembrane protein 2 (Cell proliferation-inducing gene 26 protein) (Thioredoxin domain-containing protein 14)
B5MCB5	CRABP1	Cellular retinoic acid-binding protein 1 (Fragment)
H3BRB1		Uncharacterized protein
O75616	ERAL1	GTPase Era, mitochondrial (H-ERA) (hERA) (Conserved ERA-like GTPase) (CEGA) (ERA-W) (ERA-like protein 1)
H0YK27	POU6F2	POU domain protein
P57775	FBXW4	F-box/WD repeat-containing protein 4 (Dactylin) (F-box and WD-40 domain-containing protein 4)
E9PE37	RAB2B	Ras-related protein Rab-2B
J3QRM6	DCC	Netrin receptor DCC (Fragment)
Q5VVV5	SLC2A8	Solute carrier family 2, facilitated glucose transporter member 8 (Fragment)
Q9P286	PAK5	Serine/threonine-protein kinase PAK 5 (EC 2.7.11.1) (p21-activated kinase 5) (PAK-5) (p21-activated kinase 7) (PAK-7)
K7EKG3	EML2	Echinoderm microtubule-associated protein-like 2 (Fragment)
Q96T37	RBM15	Putative RNA-binding protein 15 (One-twenty two protein 1) (RNA-binding motif protein 15)
Q5JSH3	WDR44	WD repeat-containing protein 44 (Rabphilin-11)
H0Y6K2	BRD2	Bromodomain-containing protein 2 (Fragment)
P36969	GPX4	Phospholipid hydroperoxide glutathione peroxidase (PHGPx) (EC 1.11.1.12) (Glutathione peroxidase 4) (GPx-4) (GSHPx-4)
C9IZG1	MUC13	Mucin-13 (Fragment)
H0YE76	ASCC1	Activating signal cointegrator 1 complex subunit 1 (Fragment)
C9J8S8	PTPRD	Receptor-type tyrosine-protein phosphatase delta
O60229	KALRN	Kalirin (EC 2.7.11.1) (Huntingtin-associated protein-interacting protein) (Protein Duo) (Serine/threonine-protein kinase with Dbl- and pleckstrin homology domain)
P51692	STAT5B	Signal transducer and activator of transcription 5B
E7EMF1	ITGA2	Integrin alpha-2
Q5T2W1	PDZK1	Na(+)/H(+) exchange regulatory cofactor NHE-RF3 (NHERF-3) (CFTR-associated protein of 70 kDa) (Na(+)/H(+) exchanger regulatory factor 3) (Na/Pi cotransporter C-terminal-associated protein 1) (NaPi-Cap1) (PDZ domain-containing protein 1) (Sodium-hydrogen exchanger regulatory factor 3)
P07339	CTSD	Cathepsin D (EC 3.4.23.5) [Cleaved into: Cathepsin D light chain; Cathepsin D heavy chain]
C9JAL0	CRYZL1	Quinone oxidoreductase-like protein 1 (Fragment)
Q5VX71	SUSD4	Sushi domain-containing protein 4
Q8IY17	PNPLA6	Neuropathy target esterase (EC 3.1.1.5) (Patatin-like phospholipase domain-containing protein 6)
H0Y6N7	KCNQ4	Potassium voltage-gated channel subfamily KQT member 4 (Fragment)
Q92620	DHX38	Pre-mRNA-splicing factor ATP-dependent RNA helicase PRP16 (EC 3.6.4.13) (ATP-dependent RNA helicase DHX38) (DEAH box protein 38)
Q96MI6	PPM1M	Protein phosphatase 1M (EC 3.1.3.16) (Protein phosphatase 2C isoform eta) (PP2C-eta) (PP2CE)
G3V5T7	KRAS	GTPase KRas
Q5SQQ9	VAX1	Ventral anterior homeobox 1
P01703	IGLV1-40	Immunoglobulin lambda variable 1-40 (Ig lambda chain V-I region NEWM)
P54725	RAD23A	UV excision repair protein RAD23 homolog A (HR23A) (hHR23A)
Q9BZM4	ULBP3	UL16-binding protein 3 (ALCAN-gamma) (NKG2D ligand 3) (N2DL-3) (NKG2DL3) (Retinoic acid early transcript 1N)
C9JVZ3	ULK4	Serine/threonine-protein kinase ULK4
Q5JQF8	PABPC1L2A; PABPC1L2B	Polyadenylate-binding protein 1-like 2 (RNA-binding motif protein 32) (RNA-binding protein 32)
H0YIE8	WDR83	WD repeat domain-containing protein 83 (Fragment)
B1ALA7	PRPS1	Ribose-phosphate pyrophosphokinase 1
Q8N7G0	POU5F2	POU domain, class 5, transcription factor 2 (Sperm 1 POU domain transcription factor) (SPRM-1)
Q9UHX1	PUF60	Poly(U)-binding-splicing factor PUF60 (60 kDa poly(U)-binding-splicing factor) (FUSE-binding protein-interacting repressor) (FBP-interacting repressor) (Ro-binding protein 1) (RoBP1) (Siah-binding protein 1) (Siah-BP1)
F5GYR1	RERG	Ras-related and estrogen-regulated growth inhibitor (Fragment)
P10319	HLA-B	HLA class I histocompatibility antigen, B-58 alpha chain (Bw-58) (MHC class I antigen B*58)
A0A0J9YWV2	TRBV4-1	T cell receptor beta variable 4-1 (Fragment)
F6TT59	ABCA4	Retinal-specific ATP-binding cassette transporter
B1AP13	CD55	Complement decay-accelerating factor
H0YJW7	SLIRP	SRA stem-loop-interacting RNA-binding protein, mitochondrial (Fragment)
E7ESE0	RPL9	60S ribosomal protein L9 (Fragment)
P14854	COX6B1	Cytochrome c oxidase subunit 6B1 (Cytochrome c oxidase subunit VIb isoform 1) (COX VIb-1)
W5RWE6	PXK	PX domain-containing protein kinase-like protein (PXK)
P09327	VIL1	Villin-1
P42679	MATK	Megakaryocyte-associated tyrosine-protein kinase (EC 2.7.10.2) (CSK homologous kinase) (CHK) (Hematopoietic consensus tyrosine-lacking kinase) (Protein kinase HYL) (Tyrosine-protein kinase CTK)
Q5TF39	MFSD4B	Sodium-dependent glucose transporter 1 (Major facilitator superfamily domain-containing protein 4B)
E7ESS1	TP53	Cellular tumor antigen p53 (Fragment)
P63132	HERVK_113	Endogenous retrovirus group K member 113 Pol protein (HERV-K113 Pol protein) (HERV-K_19p13.11 provirus ancestral Pol protein) [Includes: Reverse transcriptase (RT) (EC 2.7.7.49); Ribonuclease H (RNase H) (EC 3.1.26.4); Integrase (IN)]
P61163	ACTR1A	Alpha-centractin (Centractin) (ARP1) (Actin-RPV) (Centrosome-associated actin homolog)
Q8WYK1	CNTNAP5	Contactin-associated protein-like 5 (Cell recognition molecule Caspr5)
E7ENI1	LHCGR	Lutropin-choriogonadotropic hormone receptor
D6R9K7	RBM4	RNA-binding protein 4
E9PBY2	DAZ2	Deleted in azoospermia protein 2
E9PC65	PMS1	PMS1 protein homolog 1 (Fragment)
A0A0C4DH43	IGHV2-70D	Immunoglobulin heavy variable 2-70D
I3L3T1	YWHAE	14-3-3 protein epsilon
J3KP55	DLX1	Homeobox protein DLX-1 (Fragment)
P30493	HLA-B	HLA class I histocompatibility antigen, B-55 alpha chain (Bw-55) (HLA class I histocompatibility antigen, B-12 alpha chain) (MHC class I antigen B*55)
Q5T8D3	ACBD5	Acyl-CoA-binding domain-containing protein 5
P69892	HBG2	Hemoglobin subunit gamma-2 (Gamma-2-globin) (Hb F Ggamma) (Hemoglobin gamma-2 chain) (Hemoglobin gamma-G chain)
G3V2Q3	CCNK	Cyclin-K (Fragment)
G5E9C5	PDE5A	Phosphodiesterase (EC 3.1.4.-)
Q02246	CNTN2	Contactin-2 (Axonal glycoprotein TAG-1) (Axonin-1) (Transient axonal glycoprotein 1) (TAX-1)
H3BM37	NETO2	Neuropilin and tolloid-like protein 2 (Fragment)
H3BRD4	ZNF106	Zinc finger protein 106 (Fragment)
S4R433	CPA1	Carboxypeptidase A1 (Fragment)
P17483	HOXB4	Homeobox protein Hox-B4 (Homeobox protein Hox-2.6) (Homeobox protein Hox-2F)
Q9P2N4	ADAMTS9	A disintegrin and metalloproteinase with thrombospondin motifs 9 (ADAM-TS 9) (ADAM-TS9) (ADAMTS-9) (EC 3.4.24.-)
H0YGG5	A2ML1	Alpha-2-macroglobulin-like protein 1 (Fragment)
Q5VVQ7	C4BPB	C4b-binding protein beta chain (Fragment)
Q6IE36	OVOS2	Ovostatin homolog 2
E5RIH1	TMPRSS4	Transmembrane protease serine 4 (Fragment)
J3KT83	SLC16A3	Monocarboxylate transporter 4 (Fragment)
F8WFC4	MPZL1	Myelin protein zero-like protein 1
Q76LX8	ADAMTS13	A disintegrin and metalloproteinase with thrombospondin motifs 13 (ADAM-TS 13) (ADAM-TS13) (ADAMTS-13) (EC 3.4.24.87) (von Willebrand factor-cleaving protease) (vWF-CP) (vWF-cleaving protease)
G3V1V1	ZCRB1	Zinc finger CCHC-type and RNA binding motif 1, isoform CRA_b (Zinc finger CCHC-type and RNA-binding motif-containing protein 1)
A0A140TA44	C4A	Complement C4-A
Q5VTH9	WDR78	WD repeat-containing protein 78
Q8N8A6	DDX51	ATP-dependent RNA helicase DDX51 (EC 3.6.4.13) (DEAD box protein 51)
K7EKE8	NECTIN2	Nectin-2 (Fragment)
K7EQ97	CELF4	CUGBP Elav-like family member 4 (Fragment)
H0Y612	TRIM33	E3 ubiquitin-protein ligase TRIM33 (Fragment)
C9JQ94	CHN2	Beta-chimaerin (Fragment)
Q8NBQ7	AQP11	Aquaporin-11 (AQP-11)
H0Y3K3	RBM33	RNA-binding protein 33 (Fragment)
O95267	RASGRP1	RAS guanyl-releasing protein 1 (Calcium and DAG-regulated guanine nucleotide exchange factor II) (CalDAG-GEFII) (Ras guanyl-releasing protein)
A0A140T913	HLA-A	HLA class I histocompatibility antigen, A-3 alpha chain
Q96AP7	ESAM	Endothelial cell-selective adhesion molecule
Q5GAN6	RNASE10	Inactive ribonuclease-like protein 10
A0A0G2JH66	HLA-F	HLA class I histocompatibility antigen, alpha chain F
Q8NE62	CHDH	Choline dehydrogenase, mitochondrial (CDH) (CHD) (EC 1.1.99.1)
I3L167	CORO7-PAM16	Coronin
Q96E92	PRKAA1	5'-AMP-activated protein kinase catalytic subunit alpha-1 (PRKAA1 protein) (Protein kinase, AMP-activated, alpha 1 catalytic subunit, isoform CRA_b)
A0A0A0MQZ2	SYNGAP1	Ras/Rap GTPase-activating protein SynGAP (Fragment)
F2Z381	POU5F1	POU class 5 homeobox 1 transcript variant 6 (POU class 5 homeobox 1 transcript variant OCT4B1) (POU class 5 homeobox 1 transcript variant OCT4B2) (POU class 5 homeobox 1 transcript variant OCT4B3) (POU domain, class 5, transcription factor 1)
E7ES50	COL13A1	Collagen alpha-1(XIII) chain
P00709	LALBA	Alpha-lactalbumin (Lactose synthase B protein) (Lysozyme-like protein 7)
H3BQK0	DDX19B	ATP-dependent RNA helicase DDX19B (HCG1998531, isoform CRA_g)
Q13443	ADAM9	Disintegrin and metalloproteinase domain-containing protein 9 (ADAM 9) (EC 3.4.24.-) (Cellular disintegrin-related protein) (Meltrin-gamma) (Metalloprotease/disintegrin/cysteine-rich protein 9) (Myeloma cell metalloproteinase)
F5H4Z8	THBS3	Thrombospondin-3
H0YLT8	CD276	CD276 antigen (Fragment)
U3KQU6	CTSA	Carboxypeptidase (EC 3.4.16.-)
H7C144	ACTN4	Alpha-actinin-4 (Fragment)
B4E258	SYNPO2	Synaptopodin-2 (cDNA FLJ52650, moderately similar to Synaptopodin-2)
A0A0D9SF54	SPTAN1	Spectrin alpha chain, non-erythrocytic 1
F8WDP4	MAPK11	Mitogen-activated protein kinase 11
C9J338	TNIK	TRAF2 and NCK-interacting protein kinase (Fragment)
Q5U5Z8	AGBL2	Cytosolic carboxypeptidase 2 (EC 3.4.17.-) (ATP/GTP-binding protein-like 2)
Q9UJV9	DDX41	Probable ATP-dependent RNA helicase DDX41 (EC 3.6.4.13) (DEAD box protein 41) (DEAD box protein abstrakt homolog)
Q5T853	MAP3K8	Mitogen-activated protein kinase kinase kinase 8 (Fragment)
J3QQT9	RPL23	60S ribosomal protein L23 (Fragment)
Q13202	DUSP8	Dual specificity protein phosphatase 8 (EC 3.1.3.16) (EC 3.1.3.48) (Dual specificity protein phosphatase hVH-5)
B4DWY7	ADAM2	Disintegrin and metalloproteinase domain-containing protein 2 (cDNA FLJ60930, highly similar to ADAM 2 (A disintegrin and metalloproteinase domain 2))
H0Y8R1	GRSF1	G-rich sequence factor 1 (Fragment)
A0A0G2JME2	BTNL2	Butyrophilin-like protein 2
E9PBD5	ADAMTS20	A disintegrin and metalloproteinase with thrombospondin motifs 20
H3BR25	MLST8	Target of rapamycin complex subunit LST8 (Fragment)
Q9C0E4	GRIP2	Glutamate receptor-interacting protein 2 (GRIP-2)
P51812	RPS6KA3	Ribosomal protein S6 kinase alpha-3 (S6K-alpha-3) (EC 2.7.11.1) (90 kDa ribosomal protein S6 kinase 3) (p90-RSK 3) (p90RSK3) (Insulin-stimulated protein kinase 1) (ISPK-1) (MAP kinase-activated protein kinase 1b) (MAPK-activated protein kinase 1b) (MAPKAP kinase 1b) (MAPKAPK-1b) (Ribosomal S6 kinase 2) (RSK-2) (pp90RSK2)
Q8IVL0	NAV3	Neuron navigator 3 (Pore membrane and/or filament-interacting-like protein 1) (Steerin-3) (Unc-53 homolog 3) (unc53H3)
E5RJH0	BHMT	Betaine--homocysteine S-methyltransferase 1
P35443	THBS4	Thrombospondin-4
E9PCY9	TP53	Cellular tumor antigen p53 (Fragment)
H7BZJ3	PDIA3	Protein disulfide-isomerase A3 (Fragment)
Q9Y561	LRP12	Low-density lipoprotein receptor-related protein 12 (LRP-12) (Suppressor of tumorigenicity 7 protein)
A0A0G2JJR8	BAG6	Large proline-rich protein BAG6 (Fragment)
A0A0A6YYC5	TRAV14DV4	T cell receptor alpha variable 14/delta variable 4
A0A140T955	HLA-A	HLA class I histocompatibility antigen, A-3 alpha chain
H0Y998	COL4A5	Collagen alpha-5(IV) chain (Fragment)
E9PP75	CHI3L2	Chitinase-3-like protein 2 (Fragment)
F5H6F6	SLC2A14	Solute carrier family 2, facilitated glucose transporter member 14 (Fragment)
Q5TE64	BCL2L1	Bcl-2-like protein 1 (Fragment)
Q8N4V2	SVOP	Synaptic vesicle 2-related protein (SV2-related protein)
P22455	FGFR4	Fibroblast growth factor receptor 4 (FGFR-4) (EC 2.7.10.1) (CD antigen CD334)
B2R5W2	HNRNPC	Heterogeneous nuclear ribonucleoproteins C1/C2 (cDNA, FLJ92657, highly similar to Homo sapiens heterogeneous nuclear ribonucleoprotein C (C1/C2) (HNRPC), transcript variant 2, mRNA)
C9JPE8	RALA	Ras-related protein Ral-A (Fragment)
E7ESL9	AGAP3	Arf-GAP with GTPase, ANK repeat and PH domain-containing protein 3
F8W6L0	RASA4B	Ras GTPase-activating protein 4B
R4GNF9	TSTD1	Thiosulfate:glutathione sulfurtransferase
E9PPZ1	PDZD3	Na(+)/H(+) exchange regulatory cofactor NHE-RF4
P01599	IGKV1-17	Immunoglobulin kappa variable 1-17 (Ig kappa chain V-I region Gal) (Ig kappa chain V-I region WEA)
B3VCG4	CHN2	Beta chimaerin isoform B2-CHNdel ex6p-12pB
A0A140T9B8	MICA	MHC class I polypeptide-related sequence A (Fragment)
F8W6G9	FKBP1B	Peptidylprolyl isomerase (EC 5.2.1.8)
Q58FG0	HSP90AA5P	Putative heat shock protein HSP 90-alpha A5 (Heat shock protein 90-alpha E) (Heat shock protein 90Ae)
I3L3Z4	UMOD	Uromodulin (Fragment)
P01185	AVP	Vasopressin-neurophysin 2-copeptin (AVP-NPII) [Cleaved into: Arg-vasopressin (Arginine-vasopressin); Neurophysin 2 (Neurophysin-II); Copeptin]
H0YKS8	MFGE8	Lactadherin (Fragment)
F5GWQ2	ARAP1	Arf-GAP with Rho-GAP domain, ANK repeat and PH domain-containing protein 1 (Fragment)
A0A1C7CYV9	SLC22A17	Solute carrier family 22 member 17
P54277	PMS1	PMS1 protein homolog 1 (DNA mismatch repair protein PMS1)
J3KR84	PLK4	Serine/threonine-protein kinase PLK4
Q15149	PLEC	Plectin (PCN) (PLTN) (Hemidesmosomal protein 1) (HD1) (Plectin-1)
K7EQV3	MATK	Megakaryocyte-associated tyrosine-protein kinase (Fragment)
P00748	F12	Coagulation factor XII (EC 3.4.21.38) (Hageman factor) (HAF) [Cleaved into: Coagulation factor XIIa heavy chain; Beta-factor XIIa part 1; Coagulation factor XIIa light chain (Beta-factor XIIa part 2)]
Q9BZF1	OSBPL8	Oxysterol-binding protein-related protein 8 (ORP-8) (OSBP-related protein 8)
P23588	EIF4B	Eukaryotic translation initiation factor 4B (eIF-4B)
S4R2X6	SRSF4	Serine/arginine-rich-splicing factor 4
A0A0A0MTL4	NAV2	Neuron navigator 2
J3QL52	EIF4A1	Eukaryotic initiation factor 4A-I (Fragment)
F8WAQ1	SUSD1	Sushi domain-containing protein 1
Q9Y536	PPIAL4A	Peptidyl-prolyl cis-trans isomerase A-like 4A (PPIase A-like 4A) (EC 5.2.1.8) (Chromosome one-amplified sequence 2) (COAS-2) (Cyclophilin homolog overexpressed in liver cancer)
M0R1A7	RPL18A	60S ribosomal protein L18a
Q06418	TYRO3	Tyrosine-protein kinase receptor TYRO3 (EC 2.7.10.1) (Tyrosine-protein kinase BYK) (Tyrosine-protein kinase DTK) (Tyrosine-protein kinase RSE) (Tyrosine-protein kinase SKY) (Tyrosine-protein kinase TIF)
P18505	GABRB1	Gamma-aminobutyric acid receptor subunit beta-1 (GABA(A) receptor subunit beta-1)
G3V357	RNASE1	Ribonuclease pancreatic
Q9UKB1	FBXW11	F-box/WD repeat-containing protein 11 (F-box and WD repeats protein beta-TrCP2) (F-box/WD repeat-containing protein 1B) (Homologous to Slimb protein) (HOS)
Q6IE37	OVOS1	Ovostatin homolog 1
Q6NUK1	SLC25A24	Calcium-binding mitochondrial carrier protein SCaMC-1 (Mitochondrial ATP-Mg/Pi carrier protein 1) (Mitochondrial Ca(2+)-dependent solute carrier protein 1) (Small calcium-binding mitochondrial carrier protein 1) (Solute carrier family 25 member 24)
Q9UNA0	ADAMTS5	A disintegrin and metalloproteinase with thrombospondin motifs 5 (ADAM-TS 5) (ADAM-TS5) (ADAMTS-5) (EC 3.4.24.-) (A disintegrin and metalloproteinase with thrombospondin motifs 11) (ADAM-TS 11) (ADAMTS-11) (ADMP-2) (Aggrecanase-2)
H7BXJ2	UNC5D	Netrin receptor UNC5D
Q13158	FADD	FAS-associated death domain protein (FAS-associating death domain-containing protein) (Growth-inhibiting gene 3 protein) (Mediator of receptor induced toxicity) (Protein FADD)
O43251	RBFOX2	RNA binding protein fox-1 homolog 2 (Fox-1 homolog B) (Hexaribonucleotide-binding protein 2) (RNA-binding motif protein 9) (RNA-binding protein 9) (Repressor of tamoxifen transcriptional activity)
J3KNA0	OXA1L	Mitochondrial inner membrane protein OXA1L
C9JQJ2	TTN	Titin (Fragment)
A0A087X208	AGRN	Agrin
Q92832	NELL1	Protein kinase C-binding protein NELL1 (NEL-like protein 1) (Nel-related protein 1)
E9PFD7	EGFR	Receptor protein-tyrosine kinase (EC 2.7.10.1)
Q5T7B8	KIF24	Kinesin-like protein KIF24
E7EU13	ARAP1	Arf-GAP with Rho-GAP domain, ANK repeat and PH domain-containing protein 1
P06733	ENO1	Alpha-enolase (EC 4.2.1.11) (2-phospho-D-glycerate hydro-lyase) (C-myc promoter-binding protein) (Enolase 1) (MBP-1) (MPB-1) (Non-neural enolase) (NNE) (Phosphopyruvate hydratase) (Plasminogen-binding protein)
H7C480	CUBN	Cubilin (Fragment)
A0A1B0GU92		Uncharacterized protein
F8VR27	RBFOX1	RNA-binding protein fox-1 homolog 1 (Fragment)
Q8TDY3	ACTRT2	Actin-related protein T2 (ARP-T2) (Actin-related protein M2)
P18463	HLA-B	HLA class I histocompatibility antigen, B-37 alpha chain (MHC class I antigen B*37)
J3KP92	HIPK1	Homeodomain-interacting protein kinase 1
E7EUY6	ARHGEF7	Rho guanine nucleotide exchange factor 7 (Fragment)
A0A0D9SFP6	NTRK3	Tyrosine-protein kinase receptor (EC 2.7.10.1)
H0YLA4	SORD	Sorbitol dehydrogenase
C9JA69	BBX	HMG box transcription factor BBX
F8VWZ9	NKX6-1	Homeobox protein Nkx-6.1
Q09013	DMPK	Myotonin-protein kinase (MT-PK) (EC 2.7.11.1) (DM-kinase) (DMK) (DM1 protein kinase) (DMPK) (Myotonic dystrophy protein kinase)
F5GXB1	RHOF	Rho-related GTP-binding protein RhoF (Fragment)
Q5T8R5	SLC16A1	Monocarboxylate transporter 1 (Solute carrier family 16 (Monocarboxylic acid transporters), member 1, isoform CRA_a) (Fragment)
H0YB18	HYI	Putative hydroxypyruvate isomerase (Fragment)
Q99466	NOTCH4	Neurogenic locus notch homolog protein 4 (Notch 4) (hNotch4) [Cleaved into: Notch 4 extracellular truncation; Notch 4 intracellular domain]
A0A0A0MQW6	ADAMTS10	A disintegrin and metalloproteinase with thrombospondin motifs 10
O94806	PRKD3	Serine/threonine-protein kinase D3 (EC 2.7.11.13) (Protein kinase C nu type) (Protein kinase EPK2) (nPKC-nu)
Q9NRR4	DROSHA	Ribonuclease 3 (EC 3.1.26.3) (Protein Drosha) (Ribonuclease III) (RNase III) (p241)
Q9NPH0	ACP6	Lysophosphatidic acid phosphatase type 6 (EC 3.1.3.2) (Acid phosphatase 6, lysophosphatidic) (Acid phosphatase-like protein 1) (PACPL1)
Q03052	POU3F1	POU domain, class 3, transcription factor 1 (Octamer-binding protein 6) (Oct-6) (Octamer-binding transcription factor 6) (OTF-6) (POU domain transcription factor SCIP)
O75582	RPS6KA5	Ribosomal protein S6 kinase alpha-5 (S6K-alpha-5) (EC 2.7.11.1) (90 kDa ribosomal protein S6 kinase 5) (Nuclear mitogen- and stress-activated protein kinase 1) (RSK-like protein kinase) (RSKL)
P20936	RASA1	Ras GTPase-activating protein 1 (GAP) (GTPase-activating protein) (RasGAP) (Ras p21 protein activator) (p120GAP)
P30501	HLA-C	HLA class I histocompatibility antigen, Cw-2 alpha chain (MHC class I antigen Cw*2)
Q8WZ64	ARAP2	Arf-GAP with Rho-GAP domain, ANK repeat and PH domain-containing protein 2 (Centaurin-delta-1) (Cnt-d1) (Protein PARX)
F5H6T5	ARF3	ADP-ribosylation factor 3 (Fragment)
C9JNR4	RHOA	Transforming protein RhoA (Fragment)
A5PKW4	PSD	PH and SEC7 domain-containing protein 1 (Exchange factor for ADP-ribosylation factor guanine nucleotide factor 6) (Exchange factor for ARF6) (Exchange factor for ARF6 A) (Pleckstrin homology and SEC7 domain-containing protein 1)
A0A087X260	TARDBP	TAR DNA-binding protein 43
H3BS85	DOK4	Docking protein 4 (Fragment)
H0YBD7	HNRNPH1	Heterogeneous nuclear ribonucleoprotein H (Fragment)
F8VTT7	TARBP2	RISC-loading complex subunit TARBP2
A0A0A0MSX4	ROBO1	Roundabout homolog 1
P0C0S5	H2AFZ	Histone H2A.Z (H2A/z)
J3QLH6	PSMC5	26S proteasome regulatory subunit 8 (Fragment)
E7EU96	CSNK2A1	Casein kinase II subunit alpha
P58397	ADAMTS12	A disintegrin and metalloproteinase with thrombospondin motifs 12 (ADAM-TS 12) (ADAM-TS12) (ADAMTS-12) (EC 3.4.24.-)
A0A0G2JNM3	MUC4	Mucin-4 (Fragment)
A0A087WX74	CLK4	Dual-specificity protein kinase CLK4
Q96T21	SECISBP2	Selenocysteine insertion sequence-binding protein 2 (SECIS-binding protein 2)
E9PRJ4	SLC37A2	Glucose-6-phosphate exchanger SLC37A2 (Fragment)
E5RJ57	MAPK9	Mitogen-activated protein kinase 9 (Fragment)
A0A0C4DH34	IGHV4-28	Immunoglobulin heavy variable 4-28
A0A140T9J1	HLA-DQB2	HLA class II histocompatibility antigen, DQ beta 2 chain (Fragment)
E9PG46	AAK1	AP2-associated protein kinase 1
A0A0C4DFT3	DLG1	Disks large homolog 1
O75526	RBMXL2	RNA-binding motif protein, X-linked-like-2 (Testis-specific heterogeneous nuclear ribonucleoprotein G-T) (hnRNP G-T)
A0A0U1RRB2	GABRA1	Gamma-aminobutyric acid receptor subunit alpha-1 (Fragment)
P54646	PRKAA2	5'-AMP-activated protein kinase catalytic subunit alpha-2 (AMPK subunit alpha-2) (EC 2.7.11.1) (Acetyl-CoA carboxylase kinase) (ACACA kinase) (EC 2.7.11.27) (Hydroxymethylglutaryl-CoA reductase kinase) (HMGCR kinase) (EC 2.7.11.31)
B4DEW2	MAPK4	Mitogen-activated protein kinase 4 (cDNA FLJ50121, highly similar to Homo sapiens mitogen-activated protein kinase 4 (MAPK4), mRNA)
A0A140T911	HLA-DQB1	HLA class II histocompatibility antigen, DQ beta 1 chain
A0A1B0GUS7	UNC13B	Protein unc-13 homolog B
H0YJ50	VRK1	Serine/threonine-protein kinase VRK1 (Fragment)
D6RA42	MCTP1	Multiple C2 and transmembrane domain-containing protein 1 (Fragment)
A0A0A0MTM5	GABRA2	Gamma-aminobutyric acid receptor subunit alpha-2
Q5JY90	BTK	Tyrosine-protein kinase (EC 2.7.10.2)
H7BZ94	P4HB	Protein disulfide-isomerase
O75791	GRAP2	GRB2-related adapter protein 2 (Adapter protein GRID) (GRB-2-like protein) (GRB2L) (GRBLG) (GRBX) (Grf40 adapter protein) (Grf-40) (Growth factor receptor-binding protein) (Hematopoietic cell-associated adapter protein GrpL) (P38) (Protein GADS) (SH3-SH2-SH3 adapter Mona)
Q8N1S5	SLC39A11	Zinc transporter ZIP11 (Solute carrier family 39 member 11) (Zrt- and Irt-like protein 11) (ZIP-11)
G3V2N2	SIX4	Homeobox protein SIX4 (Fragment)
A0A0J9YWU9		Uncharacterized protein (Fragment)
P35548	MSX2	Homeobox protein MSX-2 (Homeobox protein Hox-8)
A0A0G2JI85	DDR1	Epithelial discoidin domain-containing receptor 1 (Fragment)
F6UDC6	STAU1	Double-stranded RNA-binding protein Staufen homolog 1 (Fragment)
Q05639	EEF1A2	Elongation factor 1-alpha 2 (EF-1-alpha-2) (Eukaryotic elongation factor 1 A-2) (eEF1A-2) (Statin-S1)
A0A0U1RR71	PLEKHG3	Pleckstrin homology domain-containing family G member 3 (Fragment)
Q969S9	GFM2	Ribosome-releasing factor 2, mitochondrial (RRF2mt) (Elongation factor G 2, mitochondrial) (EF-G2mt) (mEF-G 2) (Elongation factor G2) (hEFG2)
H7C1M9	MYO3B	Myosin-IIIb (Fragment)
Q8TD86	CALML6	Calmodulin-like protein 6 (Calglandulin-like protein)
A0A0G2JL54	C4B_2	Complement C4-B
A0A087X0V9	HSH2D	Hematopoietic SH2 domain-containing protein
O75364	PITX3	Pituitary homeobox 3 (Homeobox protein PITX3) (Paired-like homeodomain transcription factor 3)
E7ESC9	WDR17	WD repeat-containing protein 17
Q8TDN2	KCNV2	Potassium voltage-gated channel subfamily V member 2 (Voltage-gated potassium channel subunit Kv8.2)
Q99250	SCN2A	Sodium channel protein type 2 subunit alpha (HBSC II) (Sodium channel protein brain II subunit alpha) (Sodium channel protein type II subunit alpha) (Voltage-gated sodium channel subunit alpha Nav1.2)
Q9Y5Z9	UBIAD1	UbiA prenyltransferase domain-containing protein 1 (EC 2.5.1.-) (Transitional epithelial response protein 1)
Q86XX4	FRAS1	Extracellular matrix protein FRAS1
Q9Y3Q7	ADAM18	Disintegrin and metalloproteinase domain-containing protein 18 (ADAM 18) (Transmembrane metalloproteinase-like, disintegrin-like, and cysteine-rich protein III) (tMDC III)
P29973	CNGA1	cGMP-gated cation channel alpha-1 (Cyclic nucleotide-gated cation channel 1) (Cyclic nucleotide-gated channel alpha-1) (CNG channel alpha-1) (CNG-1) (CNG1) (Cyclic nucleotide-gated channel, photoreceptor) (Rod photoreceptor cGMP-gated channel subunit alpha)
P21281	ATP6V1B2	V-type proton ATPase subunit B, brain isoform (V-ATPase subunit B 2) (Endomembrane proton pump 58 kDa subunit) (HO57) (Vacuolar proton pump subunit B 2)
Q15459	SF3A1	Splicing factor 3A subunit 1 (SF3a120) (Spliceosome-associated protein 114) (SAP 114)
H0Y8M4	CCND3	G1/S-specific cyclin-D3 (Fragment)
H7BYT9	COL13A1	Collagen alpha-1(XIII) chain (Fragment)
J3KMZ9	LDLR	Low-density lipoprotein receptor (Fragment)
Q5T8R1	GSTM5	Glutathione S-transferase (EC 2.5.1.18)
A6NNA5	DRGX	Dorsal root ganglia homeobox protein (Paired-related homeobox protein-like 1)
Q9ULG1	INO80	DNA helicase INO80 (hINO80) (EC 3.6.4.12) (INO80 complex subunit A) (Putative DNA helicase INO80 complex homolog 1)
D6RHZ7	RAP1GDS1	Rap1 GTPase-GDP dissociation stimulator 1 (Fragment)
Q9P1W8	SIRPG	Signal-regulatory protein gamma (SIRP-gamma) (CD172 antigen-like family member B) (Signal-regulatory protein beta-2) (SIRP-b2) (SIRP-beta-2) (CD antigen CD172g)
F6VRR5	POLDIP3	Polymerase delta-interacting protein 3
E2QRF5	ZFAND3	AN1-type zinc finger protein 3
A0A0A0MT26	ATP1A3	Sodium/potassium-transporting ATPase subunit alpha-3
E7EML9	PRSS44	Serine protease 44 (EC 3.4.21.-) (Testis serine protease 4) (TESSP-4)
A0A0G2JJZ9	DDX39B	Spliceosome RNA helicase DDX39B (Fragment)
E9PEK0	HMGXB3	HMG domain-containing protein 3
Q14318	FKBP8	Peptidyl-prolyl cis-trans isomerase FKBP8 (PPIase FKBP8) (EC 5.2.1.8) (38 kDa FK506-binding protein) (38 kDa FKBP) (FKBP-38) (hFKBP38) (FK506-binding protein 8) (FKBP-8) (FKBPR38) (Rotamase)
A0A140T9Q5	HLA-DMB	HLA class II histocompatibility antigen, DM beta chain (Fragment)
V9GZ56	LSM4	U6 snRNA-associated Sm-like protein LSm4 (Fragment)
A0A075B7F0	IGHV3OR16-10	Immunoglobulin heavy variable 3/OR16-10 (non-functional) (Fragment)
Q8TDG4	HELQ	Helicase POLQ-like (EC 3.6.4.12) (Mus308-like helicase) (POLQ-like helicase)
D6RAN1	PDLIM7	PDZ and LIM domain protein 7 (Fragment)
E9PQB6	MRPL11	39S ribosomal protein L11, mitochondrial
P05534	HLA-A	HLA class I histocompatibility antigen, A-24 alpha chain (Aw-24) (HLA class I histocompatibility antigen, A-9 alpha chain) (MHC class I antigen A*24)
J3QR61	SMARCE1	SWI/SNF-related matrix-associated actin-dependent regulator of chromatin subfamily E member 1 (Fragment)
H7C459	MAP3K13	Mitogen-activated protein kinase kinase kinase 13 (Fragment)
E9PHB5	CTNND2	Catenin delta-2
Q06265	EXOSC9	Exosome complex component RRP45 (Autoantigen PM/Scl 1) (Exosome component 9) (P75 polymyositis-scleroderma overlap syndrome-associated autoantigen) (Polymyositis/scleroderma autoantigen 1) (Polymyositis/scleroderma autoantigen 75 kDa) (PM/Scl-75)
O95967	EFEMP2	EGF-containing fibulin-like extracellular matrix protein 2 (Fibulin-4) (FIBL-4) (Protein UPH1)
Q9Y484	WDR45	WD repeat domain phosphoinositide-interacting protein 4 (WIPI-4) (WD repeat-containing protein 45)
F2Z3K7	SLC2A6	Solute carrier family 2, facilitated glucose transporter member 6 (Fragment)
A0A0J9YX66	CELF2	CUGBP Elav-like family member 2
P42285	MTREX	Exosome RNA helicase MTR4 (EC 3.6.4.13) (ATP-dependent RNA helicase DOB1) (ATP-dependent RNA helicase SKIV2L2) (Superkiller viralicidic activity 2-like 2) (TRAMP-like complex helicase)
E7EWR4	CSTF2	Cleavage stimulation factor subunit 2
A0A0G2JS21	TPO	Thyroid peroxidase (Fragment)
H0Y7S5	SHANK2	SH3 and multiple ankyrin repeat domains protein 2 (Fragment)
S4R471	AMBP	Protein AMBP (Fragment)
Q01814	ATP2B2	Plasma membrane calcium-transporting ATPase 2 (PMCA2) (EC 3.6.3.8) (Plasma membrane calcium ATPase isoform 2) (Plasma membrane calcium pump isoform 2)
Q8IZW8	TNS4	Tensin-4 (C-terminal tensin-like protein)
A0A1B0GTS6	SCN2A	Sodium channel protein type 2 subunit alpha
Q8TDF5	NETO1	Neuropilin and tolloid-like protein 1 (Brain-specific transmembrane protein containing 2 CUB and 1 LDL-receptor class A domains protein 1)
C9JG66	MEST	Mesoderm-specific transcript homolog protein (Fragment)
Q8IV13	CCNJL	Cyclin-J-like protein
P53667	LIMK1	LIM domain kinase 1 (LIMK-1) (EC 2.7.11.1)
A0A087WWD6	PTPRT	Receptor-type tyrosine-protein phosphatase T
F5H669	CPSF7	Cleavage and polyadenylation-specificity factor subunit 7 (Fragment)
F2Z3N2	C2	Complement C2 (Fragment)
P62195	PSMC5	26S proteasome regulatory subunit 8 (26S proteasome AAA-ATPase subunit RPT6) (Proteasome 26S subunit ATPase 5) (Proteasome subunit p45) (Thyroid hormone receptor-interacting protein 1) (TRIP1) (p45/SUG)
A0A0G2JH91	MICB	MHC class I polypeptide-related sequence B
Q06187	BTK	Tyrosine-protein kinase BTK (EC 2.7.10.2) (Agammaglobulinemia tyrosine kinase) (ATK) (B-cell progenitor kinase) (BPK) (Bruton tyrosine kinase)
P57059	SIK1	Serine/threonine-protein kinase SIK1 (EC 2.7.11.1) (Salt-inducible kinase 1) (SIK-1) (Serine/threonine-protein kinase SNF1-like kinase 1) (Serine/threonine-protein kinase SNF1LK)
Q99697	PITX2	Pituitary homeobox 2 (ALL1-responsive protein ARP1) (Homeobox protein PITX2) (Paired-like homeodomain transcription factor 2) (RIEG bicoid-related homeobox transcription factor) (Solurshin)
B5MDQ0	ERCC6L	DNA excision repair protein ERCC-6-like (FLJ20105 protein, isoform CRA_a)
Q7L985	LINGO2	Leucine-rich repeat and immunoglobulin-like domain-containing nogo receptor-interacting protein 2 (Leucine-rich repeat neuronal protein 3) (Leucine-rich repeat neuronal protein 6C)
H7C1N8	EPHA4	Ephrin type-A receptor 4 (Fragment)
V9GZ59	WDR5	WD repeat-containing protein 5 (Fragment)
Q5VVF8	VLDLR	Very low-density lipoprotein receptor (Fragment)
Q9BS26	ERP44	Endoplasmic reticulum resident protein 44 (ER protein 44) (ERp44) (Thioredoxin domain-containing protein 4)
P41743	PRKCI	Protein kinase C iota type (EC 2.7.11.13) (Atypical protein kinase C-lambda/iota) (PRKC-lambda/iota) (aPKC-lambda/iota) (nPKC-iota)
A0A182DWF5	HLA-DPB1	HLA class II histocompatibility antigen, DP beta 1 chain (Fragment)
Q9H222	ABCG5	ATP-binding cassette sub-family G member 5 (Sterolin-1)
P48048	KCNJ1	ATP-sensitive inward rectifier potassium channel 1 (ATP-regulated potassium channel ROM-K) (Inward rectifier K(+) channel Kir1.1) (Potassium channel, inwardly rectifying subfamily J member 1)
H0Y987	PGM3	Phosphoacetylglucosamine mutase (Fragment)
Q5H8Y1	ROS1	Tyrosine-protein kinase receptor (EC 2.7.10.1)
Q5T0A1	DHDDS	Ditrans,polycis-polyprenyl diphosphate synthase ((2E,6E)-farnesyl diphosphate specific) (EC 2.5.1.87)
P05091	ALDH2	Aldehyde dehydrogenase, mitochondrial (EC 1.2.1.3) (ALDH class 2) (ALDH-E2) (ALDHI)
C9JZT2	EIF2AK2	Interferon-induced, double-stranded RNA-activated protein kinase (Fragment)
P11215	ITGAM	Integrin alpha-M (CD11 antigen-like family member B) (CR-3 alpha chain) (Cell surface glycoprotein MAC-1 subunit alpha) (Leukocyte adhesion receptor MO1) (Neutrophil adherence receptor) (CD antigen CD11b)
Q15043	SLC39A14	Zinc transporter ZIP14 (LIV-1 subfamily of ZIP zinc transporter 4) (LZT-Hs4) (Solute carrier family 39 member 14) (Zrt- and Irt-like protein 14) (ZIP-14)
Q13153	PAK1	Serine/threonine-protein kinase PAK 1 (EC 2.7.11.1) (Alpha-PAK) (p21-activated kinase 1) (PAK-1) (p65-PAK)
A0A0A0MSX5	HOXD8	Homeobox protein Hox-D8
E9PNR2	RIN1	Ras and Rab interactor 1
A0A0G2JNI0	TMPRSS11E	Transmembrane protease serine (EC 3.4.21.-)
H3BS77	CAPN3	Calpain-3
O15116	LSM1	U6 snRNA-associated Sm-like protein LSm1 (Cancer-associated Sm-like) (Small nuclear ribonuclear CaSm)
Q8N815	CNTD1	Cyclin N-terminal domain-containing protein 1
A0A087WUI4	TPSB2	Tryptase beta-2
E2PSN0	RBM26	RNA-binding protein 26 (Fragment)
Q9NPF0	CD320	CD320 antigen (8D6 antigen) (FDC-signaling molecule 8D6) (FDC-SM-8D6) (Transcobalamin receptor) (TCblR) (CD antigen CD320)
Q15116	PDCD1	Programmed cell death protein 1 (Protein PD-1) (hPD-1) (CD antigen CD279)
E9PF17	VCAN	Versican core protein
G3V3Y2	FBLN5	Fibulin-5 (Fragment)
P35713	SOX18	Transcription factor SOX-18
Q8N3E9	PLCD3	1-phosphatidylinositol 4,5-bisphosphate phosphodiesterase delta-3 (EC 3.1.4.11) (Phosphoinositide phospholipase C-delta-3) (Phospholipase C-delta-3) (PLC-delta-3)
P05981	HPN	Serine protease hepsin (EC 3.4.21.106) (Transmembrane protease serine 1) [Cleaved into: Serine protease hepsin non-catalytic chain; Serine protease hepsin catalytic chain]
H7BY49	TIA1	Nucleolysin TIA-1 isoform p40 (Fragment)
A0A087WV45	TTR	Transthyretin
A0A087WZY5	COL4A6	Collagen alpha-6(IV) chain
A0A0U1RR32		Histone H2A
Q15262	PTPRK	Receptor-type tyrosine-protein phosphatase kappa (Protein-tyrosine phosphatase kappa) (R-PTP-kappa) (EC 3.1.3.48)
P08218	CELA2B	Chymotrypsin-like elastase family member 2B (EC 3.4.21.71) (Elastase-2B)
F6X3N5	GNB1	Guanine nucleotide-binding protein G(I)/G(S)/G(T) subunit beta-1 (Fragment)
Q5JZY3	EPHA10	Ephrin type-A receptor 10 (EC 2.7.10.1)
B7WPE2	EML3	Echinoderm microtubule associated protein like 3, isoform CRA_e (Echinoderm microtubule-associated protein-like 3)
Q8IVW4	CDKL3	Cyclin-dependent kinase-like 3 (EC 2.7.11.22) (Serine/threonine-protein kinase NKIAMRE)
Q9Y2U5	MAP3K2	Mitogen-activated protein kinase kinase kinase 2 (EC 2.7.11.25) (MAPK/ERK kinase kinase 2) (MEK kinase 2) (MEKK 2)
P28161	GSTM2	Glutathione S-transferase Mu 2 (EC 2.5.1.18) (GST class-mu 2) (GSTM2-2)
A0A140T997	HLA-B	HLA class I histocompatibility antigen, B-46 alpha chain (Fragment)
M0R3I5	RPL21	60S ribosomal protein L21
Q9H3D4	TP63	Tumor protein 63 (p63) (Chronic ulcerative stomatitis protein) (CUSP) (Keratinocyte transcription factor KET) (Transformation-related protein 63) (TP63) (Tumor protein p73-like) (p73L) (p40) (p51)
Q29836	HLA-B	HLA class I histocompatibility antigen, B-67 alpha chain (MHC class I antigen B*67)
P46059	SLC15A1	Solute carrier family 15 member 1 (Intestinal H(+)/peptide cotransporter) (Oligopeptide transporter, small intestine isoform) (Peptide transporter 1)
D6RFI7	HAPLN1	Hyaluronan and proteoglycan link protein 1 (Fragment)
Q9NQW7	XPNPEP1	Xaa-Pro aminopeptidase 1 (EC 3.4.11.9) (Aminoacylproline aminopeptidase) (Cytosolic aminopeptidase P) (Soluble aminopeptidase P) (sAmp) (X-Pro aminopeptidase 1) (X-prolyl aminopeptidase 1, soluble)
Q15825	CHRNA6	Neuronal acetylcholine receptor subunit alpha-6
P0DN37	PPIAL4G	Peptidyl-prolyl cis-trans isomerase A-like 4G (PPIase A-like 4G) (EC 5.2.1.8) (Peptidylprolyl cis-trans isomerase A-like 4)
A0A0U1RQJ0	DDX17	Probable ATP-dependent RNA helicase DDX17 (Fragment)
H0YA66	ANK3	Ankyrin-3 (Fragment)
Q9Y6L7	TLL2	Tolloid-like protein 2 (EC 3.4.24.-)
Q92828	CORO2A	Coronin-2A (IR10) (WD repeat-containing protein 2)
A0A0G2JNH7	EPHB6	Ephrin type-B receptor 6
H0YBC2	PIK3R1	Phosphatidylinositol 3-kinase regulatory subunit alpha (Fragment)
Q14449	GRB14	Growth factor receptor-bound protein 14 (GRB14 adapter protein)
Q8TBZ3	WDR20	WD repeat-containing protein 20 (Protein DMR)
Q6PJ61	FBXO46	F-box only protein 46 (F-box only protein 34-like)
Q494W8	CHRFAM7A	CHRNA7-FAM7A fusion protein (CHRNA7-DR1) (D-10)
Q5JRI1	SRSF10	Serine/arginine-rich-splicing factor 10
Q96L46	CAPNS2	Calpain small subunit 2 (CSS2) (Calcium-dependent protease small subunit 2)
Q9NQI0	DDX4	Probable ATP-dependent RNA helicase DDX4 (EC 3.6.4.13) (DEAD box protein 4) (Vasa homolog)
Q15750	TAB1	TGF-beta-activated kinase 1 and MAP3K7-binding protein 1 (Mitogen-activated protein kinase kinase kinase 7-interacting protein 1) (TGF-beta-activated kinase 1-binding protein 1) (TAK1-binding protein 1)
Q05707	COL14A1	Collagen alpha-1(XIV) chain (Undulin)
C9JY42	DGKD	Diacylglycerol kinase delta (Fragment)
A0A0J9YXX5	PUF60	Poly(U)-binding-splicing factor PUF60 (Fragment)
G5E9G0	RPL3	60S ribosomal protein L3 (Ribosomal protein L3, isoform CRA_e)
E9PKY7	FTH1	Ferritin (Fragment)
A0A1B0GV44	CHRNA7	Neuronal acetylcholine receptor subunit alpha-7 (Fragment)
Q8IV61	RASGRP3	Ras guanyl-releasing protein 3 (Calcium and DAG-regulated guanine nucleotide exchange factor III) (Guanine nucleotide exchange factor for Rap1)
E9PP97	CHRNA6	Neuronal acetylcholine receptor subunit alpha-6 (Fragment)
P00533	EGFR	Epidermal growth factor receptor (EC 2.7.10.1) (Proto-oncogene c-ErbB-1) (Receptor tyrosine-protein kinase erbB-1)
B1ALF6	SMARCA2	Probable global transcription activator SNF2L2
D6RF77	PGM3	Phosphoacetylglucosamine mutase (Fragment)
J3QLU9	ERBB2	Receptor protein-tyrosine kinase (EC 2.7.10.1)
A6NIW2	DOCK11	Dedicator of cytokinesis protein 11
E7EX50	SHANK2	SH3 and multiple ankyrin repeat domains protein 2
A0A096LNH4	LOC102724488	Uncharacterized protein (Fragment)
E7EM58	STK25	Serine/threonine-protein kinase 25 (Fragment)
Q15084	PDIA6	Protein disulfide-isomerase A6 (EC 5.3.4.1) (Endoplasmic reticulum protein 5) (ER protein 5) (ERp5) (Protein disulfide isomerase P5) (Thioredoxin domain-containing protein 7)
R4GNC7	LAMC1	Laminin subunit gamma-1 (Fragment)
M0R1V7	UBA52	Ubiquitin-60S ribosomal protein L40 (Fragment)
G8JLH9	STAT3	Signal transducer and activator of transcription
E9PL99	DHDDS	Dehydrodolichyl diphosphate synthase complex subunit DHDDS (Fragment)
A0A1B0GU11	CHRNA7	Neuronal acetylcholine receptor subunit alpha-7
F8W9C3	CSMD1	CUB and sushi domain-containing protein 1
Q6P1L8	MRPL14	39S ribosomal protein L14, mitochondrial (L14mt) (MRP-L14) (39S ribosomal protein L32, mitochondrial) (L32mt) (MRP-L32) (Mitochondrial large ribosomal subunit protein uL14m)
P11168	SLC2A2	Solute carrier family 2, facilitated glucose transporter member 2 (Glucose transporter type 2, liver) (GLUT-2)
K7EK77	ATP5F1A	ATP synthase subunit alpha, mitochondrial (Fragment)
P29323	EPHB2	Ephrin type-B receptor 2 (EC 2.7.10.1) (Developmentally-regulated Eph-related tyrosine kinase) (ELK-related tyrosine kinase) (EPH tyrosine kinase 3) (EPH-like kinase 5) (EK5) (hEK5) (Renal carcinoma antigen NY-REN-47) (Tyrosine-protein kinase TYRO5) (Tyrosine-protein kinase receptor EPH-3)
P15151	PVR	Poliovirus receptor (Nectin-like protein 5) (NECL-5) (CD antigen CD155)
H0YJW4	COCH	Cochlin (Fragment)
E9PG40	APP	Amyloid-beta A4 protein
Q8TCW7	ZPLD1	Zona pellucida-like domain-containing protein 1 (ZP domain-containing protein 1) (Cupulin) [Cleaved into: Zona pellucida-like domain-containing protein 1, secreted form]
P30281	CCND3	G1/S-specific cyclin-D3
A0A0G2JMC1	CHRFAM7A	CHRNA7-FAM7A fusion protein
Q9BRI3	SLC30A2	Zinc transporter 2 (ZnT-2) (Solute carrier family 30 member 2)
Q9UHI8	ADAMTS1	A disintegrin and metalloproteinase with thrombospondin motifs 1 (ADAM-TS 1) (ADAM-TS1) (ADAMTS-1) (EC 3.4.24.-) (METH-1)
Q99878	HIST1H2AJ	Histone H2A type 1-J (Histone H2A/e)
J3KPD6	HCK	Tyrosine-protein kinase (EC 2.7.10.2)
Q9H4B4	PLK3	Serine/threonine-protein kinase PLK3 (EC 2.7.11.21) (Cytokine-inducible serine/threonine-protein kinase) (FGF-inducible kinase) (Polo-like kinase 3) (PLK-3) (Proliferation-related kinase)
H7C0K6	KIF1A	Kinesin-like protein KIF1A (Fragment)
B8ZZF2	WDSUB1	WD repeat, SAM and U-box domain-containing protein 1
C9JYG3	DLG4	Disks large homolog 4 (Fragment)
A0A0A0MSI4	PLEKHB2	Pleckstrin homology domain-containing family B member 2
P0C869	PLA2G4B	Cytosolic phospholipase A2 beta (cPLA2-beta) (EC 3.1.1.4) (Phospholipase A2 group IVB)
Q9Y6N6	LAMC3	Laminin subunit gamma-3 (Laminin-12 subunit gamma) (Laminin-14 subunit gamma) (Laminin-15 subunit gamma)
D6RA95	EDA	Ectodysplasin-A (Fragment)
Q8N339	MT1M	Metallothionein-1M (MT-1M) (Metallothionein-IM) (MT-IM)
M0QZQ1	PSG1	Pregnancy-specific beta-1-glycoprotein 1 (Fragment)
P25774	CTSS	Cathepsin S (EC 3.4.22.27)
P53708	ITGA8	Integrin alpha-8 [Cleaved into: Integrin alpha-8 heavy chain; Integrin alpha-8 light chain]
O95460	MATN4	Matrilin-4
B1B0G8	F8	Coagulation factor VIII (Fragment)
A0A0A0MTC8	SCUBE2	Signal peptide, CUB and EGF-like domain-containing protein 2 (Signal peptide, CUB domain, EGF-like 2, isoform CRA_b)
P52292	KPNA2	Importin subunit alpha-1 (Karyopherin subunit alpha-2) (RAG cohort protein 1) (SRP1-alpha)
A0A140T8Y4	HLA-A	HLA class I histocompatibility antigen, A-3 alpha chain
A0A087X2I2	GPX4	Glutathione peroxidase
A0A140T9F7	BRD2	Bromodomain-containing protein 2 (Fragment)
B1AHL2	FBLN1	Fibulin-1
Q9BZM5	ULBP2	UL16-binding protein 2 (ALCAN-alpha) (NKG2D ligand 2) (N2DL-2) (NKG2DL2) (Retinoic acid early transcript 1H)
P31943	HNRNPH1	Heterogeneous nuclear ribonucleoprotein H (hnRNP H) [Cleaved into: Heterogeneous nuclear ribonucleoprotein H, N-terminally processed]
A0A0B4J207	PRPS1L1	Ribose-phosphate pyrophosphokinase 3
J3KRG6	WSB1	WD repeat and SOCS box-containing protein 1
Q9NW64	RBM22	Pre-mRNA-splicing factor RBM22 (RNA-binding motif protein 22) (Zinc finger CCCH domain-containing protein 16)
Q6UXZ3	CD300LD	CMRF35-like molecule 4 (CLM-4) (CD300 antigen-like family member D) (CMRF35-A4) (CD antigen CD300d)
Q9HD67	MYO10	Unconventional myosin-X (Unconventional myosin-10)
A0A0B4J1X8	IGHV3-43	Immunoglobulin heavy variable 3-43
Q86V81	ALYREF	THO complex subunit 4 (Tho4) (Ally of AML-1 and LEF-1) (Aly/REF export factor) (Transcriptional coactivator Aly/REF) (bZIP-enhancing factor BEF)
A0A0D9SF51	PLCB1	Phosphoinositide phospholipase C (EC 3.1.4.11) (Fragment)
D6RFZ9	RACK1	Receptor of-activated protein C kinase 1 (Fragment)
M0QYA8	VRK3	Inactive serine/threonine-protein kinase VRK3
Q8WTU0	DDI1	Protein DDI1 homolog 1 (EC 3.4.23.-)
A0A1B0GTW8	PRSS22	Brain-specific serine protease 4
P35243	RCVRN	Recoverin (Cancer-associated retinopathy protein) (Protein CAR)
Q5S007	LRRK2	Leucine-rich repeat serine/threonine-protein kinase 2 (EC 2.7.11.1) (Dardarin)
P30466	HLA-B	HLA class I histocompatibility antigen, B-18 alpha chain (MHC class I antigen B*18)
Q86SX6	GLRX5	Glutaredoxin-related protein 5, mitochondrial (Monothiol glutaredoxin-5)
Q8WTR8	NTN5	Netrin-5 (Netrin-1-like protein)
A8TX70	COL6A5	Collagen alpha-5(VI) chain (Collagen alpha-1(XXIX) chain) (von Willebrand factor A domain-containing protein 4)
A0A0K0K1C0	TRBV11-1	T cell receptor beta variable 11-1
P20036	HLA-DPA1	HLA class II histocompatibility antigen, DP alpha 1 chain (DP(W3)) (DP(W4)) (HLA-SB alpha chain) (MHC class II DP3-alpha) (MHC class II DPA1)
A0A087WXB2	KCP	Kielin/chordin-like protein
Q5T8U3	RPL7A	60S ribosomal protein L7a (Ribosomal protein L7a) (Fragment)
H0Y4Y4	EFHD2	EF-hand domain-containing protein D2 (Fragment)
E9PJJ4	JAML	Junctional adhesion molecule-like (Fragment)
E5RFQ9	STK3	Serine/threonine-protein kinase 3 (Fragment)
Q5SVM7	RPS6KA1	Ribosomal protein S6 kinase alpha-1 (Fragment)
O75443	TECTA	Alpha-tectorin
P35716	SOX11	Transcription factor SOX-11
Q86SE5	RALYL	RNA-binding Raly-like protein (hRALYL) (Heterogeneous nuclear ribonucleoprotein C-like 3) (hnRNP core protein C-like 3)
H3BUF6	ATXN2L	Ataxin-2-like protein
C9JLU5	MASP1	Mannan-binding lectin serine protease 1 (Fragment)
K7EM90	ENO1	Alpha-enolase (Fragment)
Q86Z02	HIPK1	Homeodomain-interacting protein kinase 1 (EC 2.7.11.1) (Nuclear body-associated kinase 2)
Q5XUX0	FBXO31	F-box only protein 31
P10316	HLA-A	HLA class I histocompatibility antigen, A-69 alpha chain (Aw-69) (HLA class I histocompatibility antigen, A-28 alpha chain) (MHC class I antigen A*69)
P03950	ANG	Angiogenin (EC 3.1.27.-) (Ribonuclease 5) (RNase 5)
O60487	MPZL2	Myelin protein zero-like protein 2 (Epithelial V-like antigen 1)
E9PDB7	PXYLP1	2-phosphoxylose phosphatase 1
A8MXP8	RCN2	Reticulocalbin-2
A0A140T945	HLA-DOB	HLA class II histocompatibility antigen, DO beta chain (Fragment)
H0Y338	RALGPS2	Ras-specific guanine nucleotide-releasing factor RalGPS2 (Fragment)
H0YNF5	IDH3A	Isocitrate dehydrogenase [NAD] subunit alpha, mitochondrial
P54108	CRISP3	Cysteine-rich secretory protein 3 (CRISP-3) (Specific granule protein of 28 kDa) (SGP28)
G3V520	PRKCH	Protein kinase C eta type (Fragment)
Q4VXT5	PABPC1L	Polyadenylate-binding protein 1-like
A0A087X197	LRCH4	Leucine-rich repeat and calponin homology domain-containing protein 4
E9PHY0	ACP2	Lysosomal acid phosphatase
G3V361	CALM1	Calmodulin-1 (Fragment)
P49796	RGS3	Regulator of G-protein signaling 3 (RGP3) (RGS3)
O75074	LRP3	Low-density lipoprotein receptor-related protein 3 (LRP-3) (105 kDa low-density lipoprotein receptor-related protein) (hLRp105)
H0Y351	LAMA4	Laminin subunit alpha-4 (Fragment)
Q99879	HIST1H2BM	Histone H2B type 1-M (Histone H2B.e) (H2B/e)
C9JH98	NRP2	Neuropilin-2 (Fragment)
C9IZD3	ARHGAP17	Rho GTPase-activating protein 17 (Fragment)
K7EIQ7	RHOT1	Mitochondrial Rho GTPase 1 (Fragment)
H0Y6A4	PAEP	Glycodelin (Fragment)
Q7L1I2	SV2B	Synaptic vesicle glycoprotein 2B
A0A0B4J240	TRAV10	T cell receptor alpha variable 10
Q9Y2U2	KCNK7	Potassium channel subfamily K member 7
Q96JA1	LRIG1	Leucine-rich repeats and immunoglobulin-like domains protein 1 (LIG-1)
Q9Y4H2	IRS2	Insulin receptor substrate 2 (IRS-2)
C9J486	UPP1	Uridine phosphorylase 1 (Fragment)
Q6GMR7	FAAH2	Fatty-acid amide hydrolase 2 (EC 3.5.1.99) (Amidase domain-containing protein) (Anandamide amidohydrolase 2) (Oleamide hydrolase 2)
P78536	ADAM17	Disintegrin and metalloproteinase domain-containing protein 17 (ADAM 17) (EC 3.4.24.86) (Snake venom-like protease) (TNF-alpha convertase) (TNF-alpha-converting enzyme) (CD antigen CD156b)
P46777	RPL5	60S ribosomal protein L5 (Large ribosomal subunit protein uL18)
G3V2W4	ACTN1	Alpha-actinin-1 (Fragment)
H0YKJ1	HMBOX1	Homeobox-containing protein 1
A0A087WTD7	AKAP13	A-kinase anchor protein 13
E9PNB9	RAB30	Ras-related protein Rab-30
H7C0A7	AGAP1	Arf-GAP with GTPase, ANK repeat and PH domain-containing protein 1 (Fragment)
P13796	LCP1	Plastin-2 (L-plastin) (LC64P) (Lymphocyte cytosolic protein 1) (LCP-1)
E9PAP0	LCK	Tyrosine-protein kinase Lck (Fragment)
Q9Y2L9	LRCH1	Leucine-rich repeat and calponin homology domain-containing protein 1 (Calponin homology domain-containing protein 1) (Neuronal protein 81) (NP81)
B4DZ74	RDM1	RAD52 motif-containing protein 1 (cDNA FLJ60198, highly similar to Homo sapiens RAD52 motif 1 (RDM1), transcript variant 2, mRNA)
H3BM82	ZFAND6	AN1-type zinc finger protein 6 (Fragment)
A0A0D9SEZ7	MAGI2	Membrane-associated guanylate kinase, WW and PDZ domain-containing protein 2 (Fragment)
R4GMT0	ACTR1A	Alpha-centractin
F8VQP2	ATXN2	Ataxin-2
Q8N556	AFAP1	Actin filament-associated protein 1 (110 kDa actin filament-associated protein) (AFAP-110)
J3KNX1	ENO4	Enolase 4
P49747	COMP	Cartilage oligomeric matrix protein (COMP) (Thrombospondin-5) (TSP5)
C9JTS3	AAMP	Angio-associated migratory cell protein (Fragment)
H7C4S5	BRAF	Serine/threonine-protein kinase B-raf (Fragment)
A0A140T986	MICA	MHC class I polypeptide-related sequence A
X6RKN2	NFASC	Neurofascin (Fragment)
H7C398	PPIP5K1	Inositol hexakisphosphate and diphosphoinositol-pentakisphosphate kinase 1 (Fragment)
P13765	HLA-DOB	HLA class II histocompatibility antigen, DO beta chain (MHC class II antigen DOB)
H0YAQ8	PPIL6	Peptidyl-prolyl cis-trans isomerase (PPIase) (EC 5.2.1.8) (Fragment)
P11117	ACP2	Lysosomal acid phosphatase (LAP) (EC 3.1.3.2)
Q8NHS7	PTPRS	PTPRS protein (Receptor-type tyrosine-protein phosphatase S)
B7Z4G8	APLP1	Amyloid-like protein 1 (cDNA FLJ56046, highly similar to Amyloid-like protein 1 (APLP)(APLP-1))
A0A0G2JNC5	EPHB6	Ephrin type-B receptor 6
C6ZRK5	TCF7L2	TCF7L2 isoform pFC8A_TCF7L2_ex1-11-13-14 (Transcription factor 7-like 2) (Transcription factor 7-like 2 (T-cell specific, HMG-box), isoform CRA_i)
F8VRE9	CORO1C	Coronin (Fragment)
Q5JX61	CPNE1	Copine-1 (Fragment)
R4GN27	KIF12	Kinesin-like protein
Q9NVP2	ASF1B	Histone chaperone ASF1B (Anti-silencing function protein 1 homolog B) (hAsf1) (hAsf1b) (CCG1-interacting factor A-II) (CIA-II) (hCIA-II)
O00238	BMPR1B	Bone morphogenetic protein receptor type-1B (BMP type-1B receptor) (BMPR-1B) (EC 2.7.11.30) (CD antigen CDw293)
A0A087X080	RYR3	Ryanodine receptor 3
K7EQ72	CNN1	Calponin (Fragment)
C9J6H5	ADAM9	Disintegrin and metalloproteinase domain-containing protein 9
A0A1B0GUH0	RP1	Oxygen-regulated protein 1
Q9Y2B2	PIGL	N-acetylglucosaminyl-phosphatidylinositol de-N-acetylase (EC 3.5.1.89) (Phosphatidylinositol-glycan biosynthesis class L protein) (PIG-L)
P27037	ACVR2A	Activin receptor type-2A (EC 2.7.11.30) (Activin receptor type IIA) (ACTR-IIA) (ACTRIIA)
M0R0E4	PSG9	Pregnancy-specific beta-1-glycoprotein 9
B7Z264	DLG2	Disks large homolog 2 (cDNA FLJ53314, highly similar to Discs large homolog 2)
O15297	PPM1D	Protein phosphatase 1D (EC 3.1.3.16) (Protein phosphatase 2C isoform delta) (PP2C-delta) (Protein phosphatase magnesium-dependent 1 delta) (p53-induced protein phosphatase 1)
P13674	P4HA1	Prolyl 4-hydroxylase subunit alpha-1 (4-PH alpha-1) (EC 1.14.11.2) (Procollagen-proline,2-oxoglutarate-4-dioxygenase subunit alpha-1)
O76071	CIAO1	Probable cytosolic iron-sulfur protein assembly protein CIAO1 (WD repeat-containing protein 39)
Q9UQN3	CHMP2B	Charged multivesicular body protein 2b (CHMP2.5) (Chromatin-modifying protein 2b) (CHMP2b) (Vacuolar protein sorting-associated protein 2-2) (Vps2-2) (hVps2-2)
M0QXX2	KLK5	Kallikrein-5 (Fragment)
Q86Y07	VRK2	Serine/threonine-protein kinase VRK2 (EC 2.7.11.1) (Vaccinia-related kinase 2)
Q53FA7	TP53I3	Quinone oxidoreductase PIG3 (EC 1.-.-.-) (Tumor protein p53-inducible protein 3) (p53-induced gene 3 protein)
H7BYJ3	CIT	Citron Rho-interacting kinase (Fragment)
I3L3W9	ALDH3A1	Aldehyde dehydrogenase, dimeric NADP-preferring (Fragment)
A0A140T9B7	HLA-F	HLA class I histocompatibility antigen, alpha chain F
F8VSA6	NEDD8	NEDD8
A0A0G2JRX3	TPO	Thyroid peroxidase (Fragment)
A0A1B0GX78	TRBV12-5	T cell receptor beta variable 12-5
G3V2J8	HSP90AA1	Heat shock protein HSP 90-alpha (Fragment)
J3KSD1	PIGL	N-acetylglucosaminyl-phosphatidylinositol de-N-acetylase
I3L3C7	PRSS21	Testisin (Fragment)
F8VPI7	STAU2	Double-stranded RNA-binding protein Staufen homolog 2
A0A0G2JSC3	MUC4	Mucin-4
Q9GZV7	HAPLN2	Hyaluronan and proteoglycan link protein 2 (Brain link protein 1)
A0A1B0GWJ3	GRIP2	Glutamate receptor-interacting protein 2
B4DHE8	MSI2	RNA-binding protein Musashi homolog 2 (cDNA FLJ56904, highly similar to RNA-binding protein Musashi homolog 2)
Q2XQG4	KLK9	Kallikrein 9 (Fragment)
Q9P1W9	PIM2	Serine/threonine-protein kinase pim-2 (EC 2.7.11.1) (Pim-2h)
Q96QS3	ARX	Homeobox protein ARX (Aristaless-related homeobox)
E9PID8	CSTF2	Cleavage stimulation factor subunit 2
Q99712	KCNJ15	ATP-sensitive inward rectifier potassium channel 15 (Inward rectifier K(+) channel Kir1.3) (Inward rectifier K(+) channel Kir4.2) (Potassium channel, inwardly rectifying subfamily J member 15)
E9PJX5	BLK	Tyrosine-protein kinase (EC 2.7.10.2)
E7EQU1	HMGB3	High mobility group protein B3 (Fragment)
A0A087WYV8	FBN2	Fibrillin-2
E5RG71	RALYL	RNA-binding Raly-like protein (Fragment)
O00220	TNFRSF10A	Tumor necrosis factor receptor superfamily member 10A (Death receptor 4) (TNF-related apoptosis-inducing ligand receptor 1) (TRAIL receptor 1) (TRAIL-R1) (CD antigen CD261)
Q9HA82	CERS4	Ceramide synthase 4 (CerS4) (LAG1 longevity assurance homolog 4)
P05413	FABP3	Fatty acid-binding protein, heart (Fatty acid-binding protein 3) (Heart-type fatty acid-binding protein) (H-FABP) (Mammary-derived growth inhibitor) (MDGI) (Muscle fatty acid-binding protein) (M-FABP)
O95777	LSM8	U6 snRNA-associated Sm-like protein LSm8
J3KN95	PGM3	Phosphoacetylglucosamine mutase (PAGM) (EC 5.4.2.3) (Acetylglucosamine phosphomutase) (N-acetylglucosamine-phosphate mutase)
P28360	MSX1	Homeobox protein MSX-1 (Homeobox protein Hox-7) (Msh homeobox 1-like protein)
Q02985	CFHR3	Complement factor H-related protein 3 (FHR-3) (DOWN16) (H factor-like protein 3)
A0A087WZ06	STK3	Serine/threonine-protein kinase 3
D6RGJ1	C1QB	Complement C1q subcomponent subunit B (Fragment)
J3QQQ7	ZADH2	Prostaglandin reductase 3 (Fragment)
D6RBD0	RACK1	Receptor of-activated protein C kinase 1 (Fragment)
K7ENT7	WNK4	Serine/threonine-protein kinase WNK4
Q71UI9	H2AFV	Histone H2A.V (H2A.F/Z)
P63000	RAC1	Ras-related C3 botulinum toxin substrate 1 (Cell migration-inducing gene 5 protein) (Ras-like protein TC25) (p21-Rac1)
P18054	ALOX12	Arachidonate 12-lipoxygenase, 12S-type (12S-LOX) (12S-lipoxygenase) (EC 1.13.11.31) (Lipoxin synthase 12-LO) (EC 3.3.2.-) (Platelet-type lipoxygenase 12)
E5RIE9	FBXL8	F-box/LRR-repeat protein 8 (Fragment)
P00325	ADH1B	Alcohol dehydrogenase 1B (EC 1.1.1.1) (Alcohol dehydrogenase subunit beta)
O95388	WISP1	WNT1-inducible-signaling pathway protein 1 (WISP-1) (CCN family member 4) (Wnt-1-induced secreted protein)
Q6MZM0	HEPHL1	Hephaestin-like protein 1 (EC 1.-.-.-)
Q8WXG8	S100Z	Protein S100-Z (S100 calcium-binding protein Z)
A0A087WXT0	TNN	Tenascin-N
A0A087WXL2	OBP2A	Odorant-binding protein 2a
E7EPP6	CHEK1	Serine/threonine-protein kinase Chk1
P54764	EPHA4	Ephrin type-A receptor 4 (EC 2.7.10.1) (EPH-like kinase 8) (EK8) (hEK8) (Tyrosine-protein kinase TYRO1) (Tyrosine-protein kinase receptor SEK)
A0A1B0GW24	CABP2	Calcium-binding protein 2
F5GZK2	COL21A1	Collagen alpha-1(XXI) chain
H3BN78	SYT17	Synaptotagmin-17
P63267	ACTG2	Actin, gamma-enteric smooth muscle (Alpha-actin-3) (Gamma-2-actin) (Smooth muscle gamma-actin) [Cleaved into: Actin, gamma-enteric smooth muscle, intermediate form]
Q15291	RBBP5	Retinoblastoma-binding protein 5 (RBBP-5) (Retinoblastoma-binding protein RBQ-3)
Q9P2D1	CHD7	Chromodomain-helicase-DNA-binding protein 7 (CHD-7) (EC 3.6.4.12) (ATP-dependent helicase CHD7)
A0A0G2JK02	PPT2	Lysosomal thioesterase PPT2 (Fragment)
B4DGG4	SERHL2	Serine hydrolase-like protein 2 (cDNA FLJ60497, highly similar to Serine hydrolase-like protein (EC 3.1.-.-))
F5H004	RAP1B	Ras-related protein Rap-1b (Fragment)
J3QLW4	BPTF	Nucleosome-remodeling factor subunit BPTF (Fragment)
H3BV80	RNPS1	RNA-binding protein with serine-rich domain 1
A0A0A0MQU0	WDR18	WD repeat-containing protein 18 (Fragment)
Q9HB75	PIDD1	p53-induced death domain-containing protein 1 (Leucine-rich repeat and death domain-containing protein)
Q6UWL6	KIRREL2	Kin of IRRE-like protein 2 (Kin of irregular chiasm-like protein 2) (Nephrin-like protein 3)
Q9BUY7	EFCAB11	EF-hand calcium-binding domain-containing protein 11
H3BT15	IL16	Pro-interleukin-16
Q52WX2	SBK1	Serine/threonine-protein kinase SBK1 (EC 2.7.11.1) (SH3-binding kinase 1)
A0A087X109	ALOX5	Arachidonate 5-lipoxygenase
A0A087X188	BIN2	Bridging integrator 2
A0A087WWV9	DNAI1	Dynein intermediate chain 1, axonemal
P04222	HLA-C	HLA class I histocompatibility antigen, Cw-3 alpha chain (MHC class I antigen Cw*3)
P14678	SNRPB	Small nuclear ribonucleoprotein-associated proteins B and B' (snRNP-B) (Sm protein B/B') (Sm-B/B') (SmB/B')
Q8NER5	ACVR1C	Activin receptor type-1C (EC 2.7.11.30) (Activin receptor type IC) (ACTR-IC) (Activin receptor-like kinase 7) (ALK-7)
Q13310	PABPC4	Polyadenylate-binding protein 4 (PABP-4) (Poly(A)-binding protein 4) (Activated-platelet protein 1) (APP-1) (Inducible poly(A)-binding protein) (iPABP)
A8MV57	MPTX1	Putative mucosal pentraxin homolog
J3QRU2	SLC16A3	Monocarboxylate transporter 4 (Fragment)
M0R257	RAB3A	Ras-related protein Rab-3A (Fragment)
H0Y818	MLH1	DNA mismatch repair protein Mlh1 (Fragment)
A6PVD9	COL21A1	Collagen alpha-1(XXI) chain (Fragment)
J3QRI7	RPL26	60S ribosomal protein L26 (Fragment)
H0YMT6	ADAM8	Disintegrin and metalloproteinase domain-containing protein 8 (Fragment)
P31146	CORO1A	Coronin-1A (Coronin-like protein A) (Clipin-A) (Coronin-like protein p57) (Tryptophan aspartate-containing coat protein) (TACO)
G3V235	CCNK	Cyclin-K (Fragment)
R4GMU6	APC	Adenomatous polyposis coli protein (Fragment)
A0A0D9SF60	PKP4	Plakophilin-4
J3KRS3	ARHGAP44	Rho GTPase-activating protein 44
P04070	PROC	Vitamin K-dependent protein C (EC 3.4.21.69) (Anticoagulant protein C) (Autoprothrombin IIA) (Blood coagulation factor XIV) [Cleaved into: Vitamin K-dependent protein C light chain; Vitamin K-dependent protein C heavy chain; Activation peptide]
G3V1J0	WDR55	WD repeat domain 55, isoform CRA_b (WD repeat-containing protein 55)
A0A140T9T7	TAP1	Antigen peptide transporter 1
E9PK85	RRAS2	Ras-related protein R-Ras2 (Fragment)
Q13588	GRAP	GRB2-related adapter protein
D6R9E7	WDR41	WD repeat-containing protein 41 (Fragment)
A0A0A0MSA6	CELA3B	Chymotrypsin-like elastase family member 3B (Fragment)
Q8N531	FBXL6	F-box/LRR-repeat protein 6 (F-box and leucine-rich repeat protein 6) (F-box protein FBL6) (FBL6A)
E9PSF9	SLC16A12	Monocarboxylate transporter 12
Q5VW43	ADARB2	Double-stranded RNA-specific editase B2
A0A0G2JPD3	HLA-A	HLA class I histocompatibility antigen, A-3 alpha chain
O43852	CALU	Calumenin (Crocalbin) (IEF SSP 9302)
A0A0A0MSD0	SVEP1	Sushi, von Willebrand factor type A, EGF and pentraxin domain-containing protein 1
Q96AZ6	ISG20	Interferon-stimulated gene 20 kDa protein (EC 3.1.13.1) (Estrogen-regulated transcript 45 protein) (Promyelocytic leukemia nuclear body-associated protein ISG20)
Q8NFW5	DMBX1	Diencephalon/mesencephalon homeobox protein 1 (Orthodenticle homolog 3) (Paired-like homeobox protein DMBX1)
Q6UXF7	CLEC18B	C-type lectin domain family 18 member B (Mannose receptor-like protein 1)
Q96S53	TESK2	Dual specificity testis-specific protein kinase 2 (EC 2.7.12.1) (Testicular protein kinase 2)
Q58FF7	HSP90AB3P	Putative heat shock protein HSP 90-beta-3 (Heat shock protein 90-beta c) (Heat shock protein 90Bc)
Q5SZE1	CERS2	Ceramide synthase 2 (Fragment)
A3QK37	CAPN8	Calpain-8 (Fragment)
E9PRQ8	EFEMP2	EGF-containing fibulin-like extracellular matrix protein 2 (Fragment)
A6NIR2	HSPB11	Chromosome 1 open reading frame 41, isoform CRA_b (Intraflagellar transport protein 25 homolog)
P0DJD7	PGA4	Pepsin A-4 (EC 3.4.23.1) (Pepsinogen-4)
Q9Y426	C2CD2	C2 domain-containing protein 2 (Transmembrane protein 24-like)
Q9H6Q3	SLA2	Src-like-adapter 2 (Modulator of antigen receptor signaling) (MARS) (Src-like adapter protein 2) (SLAP-2)
J3QSW6	KALRN	Kalirin
P04745	AMY1A; AMY1B; AMY1C	Alpha-amylase 1 (EC 3.2.1.1) (1,4-alpha-D-glucan glucanohydrolase 1) (Salivary alpha-amylase)
I3L4Z9	SCPEP1	Retinoid-inducible serine carboxypeptidase (Fragment)
Q9NR12	PDLIM7	PDZ and LIM domain protein 7 (LIM mineralization protein) (LMP) (Protein enigma)
K7EJB5	SNRPD2	Small nuclear ribonucleoprotein Sm D2
A0A0A0MS09	IGHD	Immunoglobulin heavy constant delta (Fragment)
Q9NW61	PLEKHJ1	Pleckstrin homology domain-containing family J member 1 (PH domain-containing family J member 1) (Guanine nucleotide-releasing protein x)
C9JWP2	PSG4	Pregnancy-specific beta-1-glycoprotein 4 (Fragment)
P0CJ85	DUX4L2	Double homeobox protein 4-like protein 2
B4DY31	VWCE	cDNA FLJ51386 (von Willebrand factor C and EGF domain-containing protein)
C9JLV4	APAF1	Apoptotic protease-activating factor 1
Q9NZN5	ARHGEF12	Rho guanine nucleotide exchange factor 12 (Leukemia-associated RhoGEF)
Q9UEL6	MPZL1	Myelin protein zero-like protein 1 (Fragment)
Q6UXE8	BTNL3	Butyrophilin-like protein 3 (Butyrophilin-like receptor)
Q96FS4	SIPA1	Signal-induced proliferation-associated protein 1 (Sipa-1) (GTPase-activating protein Spa-1) (p130 SPA-1)
Q31610	HLA-B	HLA class I histocompatibility antigen, B-81 alpha chain (B'DT) (MHC class I antigen B*81)
P55265	ADAR	Double-stranded RNA-specific adenosine deaminase (DRADA) (EC 3.5.4.37) (136 kDa double-stranded RNA-binding protein) (p136) (Interferon-inducible protein 4) (IFI-4) (K88DSRBP)
E5RGC1	FBXW11	F-box/WD repeat-containing protein 11 (Fragment)
Q86TB3	ALPK2	Alpha-protein kinase 2 (EC 2.7.11.-) (Heart alpha-protein kinase)
Q9BZP6	CHIA	Acidic mammalian chitinase (AMCase) (EC 3.2.1.14) (Lung-specific protein TSA1902)
F1T0B3	DDX1	ATP-dependent RNA helicase DDX1
Q6ZMM2	ADAMTSL5	ADAMTS-like protein 5 (ADAMTSL-5) (Thrombospondin type-1 domain-containing protein 6)
A0A075B788	PTPRC	Receptor-type tyrosine-protein phosphatase C
Q9H324	ADAMTS10	A disintegrin and metalloproteinase with thrombospondin motifs 10 (ADAM-TS 10) (ADAM-TS10) (ADAMTS-10) (EC 3.4.24.-)
P63128	ERVK-9	Endogenous retrovirus group K member 9 Pol protein (HERV-K(C6) Gag-Pol protein) (HERV-K109 Gag-Pol protein) (HERV-K_6q14.1 provirus ancestral Gag-Pol polyprotein) [Includes: Protease (EC 3.4.23.50) (PR) (Retropepsin); Reverse transcriptase/ribonuclease H (EC 2.7.7.49) (EC 2.7.7.7) (EC 3.1.26.4) (p66 RT)]
I3L4N4	FGF11	Fibroblast growth factor (FGF)
Q9UNX4	WDR3	WD repeat-containing protein 3
Q5TDH0	DDI2	Protein DDI1 homolog 2 (EC 3.4.23.-)
H7BZT7	ESD	S-formylglutathione hydrolase (EC 3.1.2.12) (Fragment)
P80188	LCN2	Neutrophil gelatinase-associated lipocalin (NGAL) (25 kDa alpha-2-microglobulin-related subunit of MMP-9) (Lipocalin-2) (Oncogene 24p3) (Siderocalin LCN2) (p25)
A6NMB1	SIGLEC16	Sialic acid-binding Ig-like lectin 16 (Siglec-16) (Siglec-P16)
E7EPJ7	TRIO	Triple functional domain protein (Fragment)
P27361	MAPK3	Mitogen-activated protein kinase 3 (MAP kinase 3) (MAPK 3) (EC 2.7.11.24) (ERT2) (Extracellular signal-regulated kinase 1) (ERK-1) (Insulin-stimulated MAP2 kinase) (MAP kinase isoform p44) (p44-MAPK) (Microtubule-associated protein 2 kinase) (p44-ERK1)
P19838	NFKB1	Nuclear factor NF-kappa-B p105 subunit (DNA-binding factor KBF1) (EBP-1) (Nuclear factor of kappa light polypeptide gene enhancer in B-cells 1) [Cleaved into: Nuclear factor NF-kappa-B p50 subunit]
P21709	EPHA1	Ephrin type-A receptor 1 (hEpha1) (EC 2.7.10.1) (EPH tyrosine kinase) (EPH tyrosine kinase 1) (Erythropoietin-producing hepatoma receptor) (Tyrosine-protein kinase receptor EPH)
A0A0A0MSY1	WDR64	WD repeat-containing protein 64 (Fragment)
A2VEC9	SSPO	SCO-spondin
Q8NCC5	SLC37A3	Sugar phosphate exchanger 3 (Solute carrier family 37 member 3)
Q14011	CIRBP	Cold-inducible RNA-binding protein (A18 hnRNP) (Glycine-rich RNA-binding protein CIRP)
F6UH26	SMARCA2	Probable global transcription activator SNF2L2 (Fragment)
E5RGP3	PLEKHA2	Pleckstrin homology domain-containing family A member 2 (Fragment)
H3BRL3	UBFD1	Ubiquitin domain-containing protein UBFD1
H0YCZ4	CDON	Cell adhesion molecule-related/down-regulated by oncogenes (Fragment)
P51813	BMX	Cytoplasmic tyrosine-protein kinase BMX (EC 2.7.10.2) (Bone marrow tyrosine kinase gene in chromosome X protein) (Epithelial and endothelial tyrosine kinase) (ETK) (NTK38)
Q9BYB4	GNB1L	Guanine nucleotide-binding protein subunit beta-like protein 1 (G protein subunit beta-like protein 1) (DGCRK3) (WD repeat-containing protein 14) (WD40 repeat-containing protein deleted in VCFS) (WDVCF)
P02458	COL2A1	Collagen alpha-1(II) chain (Alpha-1 type II collagen) [Cleaved into: Collagen alpha-1(II) chain; Chondrocalcin]
P10321	HLA-C	HLA class I histocompatibility antigen, Cw-7 alpha chain (MHC class I antigen Cw*7)
H0YBZ1	PTK2	Focal adhesion kinase 1 (Fragment)
H0YKR4	CERS4	Ceramide synthase 4 (Fragment)
Q96G03	PGM2	Phosphoglucomutase-2 (PGM 2) (EC 5.4.2.2) (Glucose phosphomutase 2) (Phosphodeoxyribomutase) (Phosphopentomutase) (EC 5.4.2.7)
P61328	FGF12	Fibroblast growth factor 12 (FGF-12) (Fibroblast growth factor homologous factor 1) (FHF-1) (Myocyte-activating factor)
H0YG10	GNL2	Nucleolar GTP-binding protein 2 (Fragment)
Q8N3Z0	PRSS35	Inactive serine protease 35
G3V251	HNRNPC	Heterogeneous nuclear ribonucleoproteins C1/C2 (Fragment)
I3L0K7	TRAP1	Heat shock protein 75 kDa, mitochondrial (TNF receptor-associated protein 1, isoform CRA_b)
E5RJY4	ITK	Tyrosine-protein kinase ITK/TSK
Q9NZV8	KCND2	Potassium voltage-gated channel subfamily D member 2 (Voltage-gated potassium channel subunit Kv4.2)
C9J4A7		Uncharacterized protein (Fragment)
F5H6Y3	C1R	Complement C1r subcomponent (Fragment)
S4R460	IGHV3OR16-9	Immunoglobulin heavy variable 3/OR16-9 (non-functional)
E9PI41	EXOSC4	Exosome complex component RRP41 (Fragment)
Q16280	CNGA2	Cyclic nucleotide-gated olfactory channel (Cyclic nucleotide-gated cation channel 2) (Cyclic nucleotide-gated channel alpha-2) (CNG channel alpha-2) (CNG-2) (CNG2)
Q09019	DMWD	Dystrophia myotonica WD repeat-containing protein (Dystrophia myotonica-containing WD repeat motif protein) (Protein 59) (Protein DMR-N9)
Q8NE71	ABCF1	ATP-binding cassette sub-family F member 1 (ATP-binding cassette 50) (TNF-alpha-stimulated ABC protein)
Q96F32	GNB5	GNB5 protein (Guanine nucleotide-binding protein subunit beta-5)
Q96SB4	SRPK1	SRSF protein kinase 1 (EC 2.7.11.1) (SFRS protein kinase 1) (Serine/arginine-rich protein-specific kinase 1) (SR-protein-specific kinase 1)
A0A1B0GUL7		Uncharacterized protein
F6V3V1	PICK1	PRKCA-binding protein (Fragment)
Q92673	SORL1	Sortilin-related receptor (Low-density lipoprotein receptor relative with 11 ligand-binding repeats) (LDLR relative with 11 ligand-binding repeats) (LR11) (SorLA-1) (Sorting protein-related receptor containing LDLR class A repeats) (SorLA)
M0R3E6	INSR	Insulin receptor (Fragment)
A0A0B4J1R4	HPD	4-hydroxyphenylpyruvate dioxygenase
F8W6C1	SPTBN1	Spectrin beta chain, non-erythrocytic 1 (Fragment)
E5RJB7	EFCAB3	EF-hand calcium-binding domain-containing protein 3 (Fragment)
Q6ZRI0	OTOG	Otogelin
E9PR92	ARMC1	Armadillo repeat-containing protein 1
Q5TF96	NCOA7	Nuclear receptor coactivator 7 (Fragment)
P07948	LYN	Tyrosine-protein kinase Lyn (EC 2.7.10.2) (Lck/Yes-related novel protein tyrosine kinase) (V-yes-1 Yamaguchi sarcoma viral related oncogene homolog) (p53Lyn) (p56Lyn)
A0A0C4DG09	CADM3	Cell adhesion molecule 3 (Fragment)
E7EQM8	DCC	Netrin receptor DCC
K7EN81	UNC13D	Protein unc-13 homolog D (Fragment)
P25815	S100P	Protein S100-P (Migration-inducing gene 9 protein) (MIG9) (Protein S100-E) (S100 calcium-binding protein P)
E9PRH4	SLC39A13	Zinc transporter ZIP13
B9A034	TNFRSF14	Tumor necrosis factor receptor superfamily member 14
P62993	GRB2	Growth factor receptor-bound protein 2 (Adapter protein GRB2) (Protein Ash) (SH2/SH3 adapter GRB2)
P54296	MYOM2	Myomesin-2 (165 kDa connectin-associated protein) (165 kDa titin-associated protein) (M-protein) (Myomesin family member 2)
Q9NRA2	SLC17A5	Sialin (H(+)/nitrate cotransporter) (H(+)/sialic acid cotransporter) (AST) (Membrane glycoprotein HP59) (Solute carrier family 17 member 5) (Vesicular H(+)/Aspartate-glutamate cotransporter)
P79483	HLA-DRB3	HLA class II histocompatibility antigen, DR beta 3 chain (MHC class II antigen DRB3)
G3V346	SRP54	Signal recognition particle 54 kDa protein (Fragment)
O75351	VPS4B	Vacuolar protein sorting-associated protein 4B (EC 3.6.4.6) (Cell migration-inducing gene 1 protein) (Suppressor of K(+) transport growth defect 1) (Protein SKD1)
Q6P9H4	CNKSR3	Connector enhancer of kinase suppressor of ras 3 (Connector enhancer of KSR 3) (CNK homolog protein 3) (CNK3) (CNKSR family member 3) (Maguin-like protein)
Q8IZX4	TAF1L	Transcription initiation factor TFIID subunit 1-like (TAF(II)210) (TBP-associated factor 1-like) (TBP-associated factor 210 kDa) (Transcription initiation factor TFIID 210 kDa subunit)
H7BXN9	SLC22A8	Solute carrier family 22 (Organic anion transporter), member 8, isoform CRA_a (Solute carrier family 22 member 8)
F2Z2Q9	ACP1	Low molecular weight phosphotyrosine protein phosphatase
[truncated: 11,454 more rows]

## Sheet: Hg_proteins
Entry	Gene names (primary )	Protein names
H9KV31	NCAM2	Neural cell adhesion molecule 2
Q16825	PTPN21	Tyrosine-protein phosphatase non-receptor type 21 (EC 3.1.3.48) (Protein-tyrosine phosphatase D1)
Q8IVL0	NAV3	Neuron navigator 3 (Pore membrane and/or filament-interacting-like protein 1) (Steerin-3) (Unc-53 homolog 3) (unc53H3)
A6NGQ3	OBSCN	Obscurin
J3QLU9	ERBB2	Receptor protein-tyrosine kinase (EC 2.7.10.1)
Q6VAB6	KSR2	Kinase suppressor of Ras 2 (hKSR2) (EC 2.7.11.1)
J3QL85	NDEL1	Nuclear distribution protein nudE-like 1 (Fragment)
H9KV75	ACTN1	Alpha-actinin-1
I3L222	PLD2	Phospholipase D2
B7WPN9	ATP13A4	Cation-transporting ATPase (EC 3.6.3.-)
Q96JT2	SLC45A3	Solute carrier family 45 member 3 (Prostate cancer-associated protein 6) (Prostein)
A0A0C4DFN7	KLRF1	Killer cell lectin-like receptor subfamily F member 1 (Killer cell lectin-like receptor subfamily F, member 1, isoform CRA_c)
Q9HBW0	LPAR2	Lysophosphatidic acid receptor 2 (LPA receptor 2) (LPA-2) (Lysophosphatidic acid receptor Edg-4)
M0R131	DYRK1B	Dual-specificity tyrosine-phosphorylation-regulated kinase 1B (Fragment)
E9PCB3	CTSB	Cathepsin B
M0QXQ7	KLK2	Kallikrein-2 (Fragment)
H0Y8A9	CFTR	Cystic fibrosis transmembrane conductance regulator (Fragment)
A0A1B0GTG4	RASSF5	Ras association domain-containing protein 5
Q86XP1	DGKH	Diacylglycerol kinase eta (DAG kinase eta) (EC 2.7.1.107) (Diglyceride kinase eta) (DGK-eta)
M0R1V7	UBA52	Ubiquitin-60S ribosomal protein L40 (Fragment)
P33763	S100A5	Protein S100-A5 (Protein S-100D) (S100 calcium-binding protein A5)
E9PLL4	NR1H3	Oxysterols receptor LXR-alpha
A4F3V8	CYP1A1	Cytochrome P450 1A1 (Fragment)
P31997	CEACAM8	Carcinoembryonic antigen-related cell adhesion molecule 8 (CD67 antigen) (Carcinoembryonic antigen CGM6) (Non-specific cross-reacting antigen NCA-95) (CD antigen CD66b)
Q8NG44	PGR	Delta 3+6/2 progesterone receptor (Progesterone receptor) (Progesterone receptor, isoform CRA_e)
O75923	DYSF	Dysferlin (Dystrophy-associated fer-1-like protein) (Fer-1-like protein 1)
D6RA44	CDK18	Cyclin-dependent kinase 18 (Fragment)
A0A140T9X6	HLA-F	HLA class I histocompatibility antigen, alpha chain F (Fragment)
E9PKV7	FGFR1	Fibroblast growth factor receptor 1 (Fragment)
F8VPF5	PRKAG1	5'-AMP-activated protein kinase subunit gamma-1 (Fragment)
P01700	IGLV1-47	Immunoglobulin lambda variable 1-47 (Ig lambda chain V-I region HA) (Ig lambda chain V-I region WAH)
Q63ZY3	KANK2	KN motif and ankyrin repeat domain-containing protein 2 (Ankyrin repeat domain-containing protein 25) (Matrix-remodeling-associated protein 3) (SRC-1-interacting protein) (SIP) (SRC-interacting protein) (SRC1-interacting protein)
H0YFL7	C1RL	Complement C1r subcomponent-like protein (Fragment)
P17405	SMPD1	Sphingomyelin phosphodiesterase (EC 3.1.4.12) (Acid sphingomyelinase) (aSMase)
P55072	VCP	Transitional endoplasmic reticulum ATPase (TER ATPase) (EC 3.6.4.6) (15S Mg(2+)-ATPase p97 subunit) (Valosin-containing protein) (VCP)
J3QSG9	NAT9	N-acetyltransferase 9
B5MD58	SREBF1	Sterol regulatory element-binding protein 1
A0A0B4J2H0	IGHV1-69D	Immunoglobulin heavy variable 1-69D
P46063	RECQL	ATP-dependent DNA helicase Q1 (EC 3.6.4.12) (DNA helicase, RecQ-like type 1) (RecQ1) (DNA-dependent ATPase Q1) (RecQ protein-like 1)
J3KQU5	EPHB6	Ephrin type-B receptor 6
A0A0U1RQL3	KIF1B	Kinesin-like protein KIF1B (Fragment)
K7EIG7	MYO1D	Unconventional myosin-Id
Q13164	MAPK7	Mitogen-activated protein kinase 7 (MAP kinase 7) (MAPK 7) (EC 2.7.11.24) (Big MAP kinase 1) (BMK-1) (Extracellular signal-regulated kinase 5) (ERK-5)
F8VX32	DMD	Dystrophin
F5GX90	P2RY6	P2Y purinoceptor 6 (Fragment)
A0A140T9X5	HLA-A	HLA class I histocompatibility antigen, A-3 alpha chain (Fragment)
H0YAZ9	CDK16	Cyclin-dependent kinase 16 (Fragment)
H7C1X3	PAK2	Serine/threonine-protein kinase PAK 2 (Fragment)
E9PP14	TSTA3	GDP-L-fucose synthase (Fragment)
P13765	HLA-DOB	HLA class II histocompatibility antigen, DO beta chain (MHC class II antigen DOB)
Q9NPB6	PARD6A	Partitioning defective 6 homolog alpha (PAR-6) (PAR-6 alpha) (PAR-6A) (PAR6C) (Tax interaction protein 40) (TIP-40)
E9PIR9	CRYBG2	Beta/gamma crystallin domain-containing protein 2
Q07283	TCHH	Trichohyalin
A0A0A0MRE3	SYNE2	Nesprin-2
H7C1A1	NPR2	Atrial natriuretic peptide receptor 2 (Fragment)
P34947	GRK5	G protein-coupled receptor kinase 5 (EC 2.7.11.16) (G protein-coupled receptor kinase GRK5)
I3L4X3	NFKBIB	NF-kappa-B inhibitor beta (Fragment)
A0A0G2JPL8		Deleted.
Q96P69	GPR78	G-protein coupled receptor 78
A0A0G2JKR7	RXRB	Retinoic acid receptor RXR-beta
Q96FL9	GALNT14	Polypeptide N-acetylgalactosaminyltransferase 14 (EC 2.4.1.41) (Polypeptide GalNAc transferase 14) (GalNAc-T14) (pp-GaNTase 14) (Protein-UDP acetylgalactosaminyltransferase 14) (UDP-GalNAc:polypeptide N-acetylgalactosaminyltransferase 14)
Q5TBG7	NEK6	Serine/threonine-protein kinase Nek6 (Fragment)
A0A1B0GU53	CACNB4	Voltage-dependent L-type calcium channel subunit beta-4
B3KR61	NDUFAF5	Arginine-hydroxylase NDUFAF5, mitochondrial (HCG1811060, isoform CRA_c) (cDNA FLJ33741 fis, clone BRAWH2018875, weakly similar to Protein At1g22800)
P51841	GUCY2F	Retinal guanylyl cyclase 2 (RETGC-2) (EC 4.6.1.2) (Guanylate cyclase 2F, retinal) (Guanylate cyclase F) (GC-F) (Rod outer segment membrane guanylate cyclase 2) (ROS-GC2)
Q9HB89	NMUR1	Neuromedin-U receptor 1 (NMU-R1) (G-protein coupled receptor 66) (G-protein coupled receptor FM-3)
A0A087WY22	PTPRT	Receptor-type tyrosine-protein phosphatase T
A0A075B6F3	DNAH8	Dynein heavy chain 8, axonemal
Q9Y5Q3	MAFB	Transcription factor MafB (Maf-B) (V-maf musculoaponeurotic fibrosarcoma oncogene homolog B)
P01814	IGHV2-70	Immunoglobulin heavy variable 2-70 (Ig heavy chain V-II region COR) (Ig heavy chain V-II region DAW) (Ig heavy chain V-II region OU) (Ig heavy chain V-II region SESS)
Q8TEK8	RASSF5	FLJ00186 protein (Ras association domain-containing protein 5) (Fragment)
Q96JB8	MPP4	MAGUK p55 subfamily member 4 (Amyotrophic lateral sclerosis 2 chromosomal region candidate gene 5 protein) (Discs large homolog 6)
P31994	FCGR2B	Low affinity immunoglobulin gamma Fc region receptor II-b (IgG Fc receptor II-b) (CDw32) (Fc-gamma RII-b) (Fc-gamma-RIIb) (FcRII-b) (CD antigen CD32)
P00749	PLAU	Urokinase-type plasminogen activator (U-plasminogen activator) (uPA) (EC 3.4.21.73) [Cleaved into: Urokinase-type plasminogen activator long chain A; Urokinase-type plasminogen activator short chain A; Urokinase-type plasminogen activator chain B]
G3V5V0	NEK9	Serine/threonine-protein kinase Nek9 (Fragment)
P41181	AQP2	Aquaporin-2 (AQP-2) (ADH water channel) (Aquaporin-CD) (AQP-CD) (Collecting duct water channel protein) (WCH-CD) (Water channel protein for renal collecting duct)
P13727	PRG2	Bone marrow proteoglycan (BMPG) (Proteoglycan 2) [Cleaved into: Eosinophil granule major basic protein (EMBP) (MBP) (Pregnancy-associated major basic protein)]
K7EMV5	ZNF444	Zinc finger protein 444 (Fragment)
D6RJH3	F2RL1	Proteinase-activated receptor 2 (Fragment)
A0A087X1W8	CADM1	Cell adhesion molecule 1
A0A087X2F4	TRDV1	T cell receptor delta variable 1
P54760	EPHB4	Ephrin type-B receptor 4 (EC 2.7.10.1) (Hepatoma transmembrane kinase) (Tyrosine-protein kinase TYRO11)
Q14204	DYNC1H1	Cytoplasmic dynein 1 heavy chain 1 (Cytoplasmic dynein heavy chain 1) (Dynein heavy chain, cytosolic)
A0A1B0GTX4	CDKL5	Cyclin-dependent kinase-like 5 (Fragment)
A2AEA2	HLA-C	HLA class I histocompatibility antigen, Cw-6 alpha chain
P26045	PTPN3	Tyrosine-protein phosphatase non-receptor type 3 (EC 3.1.3.48) (Protein-tyrosine phosphatase H1) (PTP-H1)
A0A087WU64	POLA1	DNA polymerase (EC 2.7.7.7)
Q8IXA3	CSNK1G1	Casein kinase I gamma 1 isoform (Casein kinase I isoform gamma-1) (HCG2004507, isoform CRA_d)
A0A1B0GVW8	UNC13B	Protein unc-13 homolog B
Q96IY4	CPB2	Carboxypeptidase B2 (EC 3.4.17.20) (Carboxypeptidase U) (CPU) (Plasma carboxypeptidase B) (pCPB) (Thrombin-activable fibrinolysis inhibitor) (TAFI)
O75676	RPS6KA4	Ribosomal protein S6 kinase alpha-4 (S6K-alpha-4) (EC 2.7.11.1) (90 kDa ribosomal protein S6 kinase 4) (Nuclear mitogen- and stress-activated protein kinase 2) (Ribosomal protein kinase B) (RSKB)
Q5BKV1	MYH9	MYH9 protein (Myosin-9)
H3BMM1	MYO9A	Unconventional myosin-IXa
Q6UXS0	CLEC19A	C-type lectin domain family 19 member A
A0A0A0MSW2	EBF4	Transcription factor COE4
I3L0I9	KIR2DP1	Killer cell immunoglobulin-like receptor, two Ig domains pseudogene 1
Q92620	DHX38	Pre-mRNA-splicing factor ATP-dependent RNA helicase PRP16 (EC 3.6.4.13) (ATP-dependent RNA helicase DHX38) (DEAH box protein 38)
K7EKQ0	SPINT2	Kunitz-type protease inhibitor 2 (Fragment)
A0A182DWF3	TXNRD2	Thioredoxin reductase 2, mitochondrial
K7EPZ1	ZNF500	Zinc finger protein 500 (Fragment)
A0A0C4DH55	IGKV3D-7	Immunoglobulin kappa variable 3D-7
D6RF74	RAI14	Ankycorbin (Fragment)
O00220	TNFRSF10A	Tumor necrosis factor receptor superfamily member 10A (Death receptor 4) (TNF-related apoptosis-inducing ligand receptor 1) (TRAIL receptor 1) (TRAIL-R1) (CD antigen CD261)
Q14324	MYBPC2	Myosin-binding protein C, fast-type (Fast MyBP-C) (C-protein, skeletal muscle fast isoform)
A0A140T9G7	HLA-DPA1	HLA class II histocompatibility antigen, DP alpha 1 chain (Fragment)
Q13402	MYO7A	Unconventional myosin-VIIa
A0A0C4DH68	IGKV2-24	Immunoglobulin kappa variable 2-24
P19021	PAM	Peptidyl-glycine alpha-amidating monooxygenase (PAM) [Includes: Peptidylglycine alpha-hydroxylating monooxygenase (PHM) (EC 1.14.17.3); Peptidyl-alpha-hydroxyglycine alpha-amidating lyase (EC 4.3.2.5) (Peptidylamidoglycolate lyase) (PAL)]
A0A087WTL7	GPR39	G-protein-coupled receptor 39
P63133	ERVK-8	Endogenous retrovirus group K member 8 Pol protein (HERV-K115 Pol protein) (HERV-K_8p23.1 provirus ancestral Pol protein) [Includes: Reverse transcriptase (RT) (EC 2.7.7.49); Ribonuclease H (RNase H) (EC 3.1.26.4); Integrase (IN)]
H7BXY5	NEXN	Nexilin (Fragment)
Q7Z553	MDGA2	MAM domain-containing glycosylphosphatidylinositol anchor protein 2 (MAM domain-containing protein 1)
A0A140TA34	HLA-DQA2	HLA class II histocompatibility antigen, DQ alpha 2 chain (HLADQA2)
D6RIH8	CDH18	Cadherin-18
P62508	ESRRG	Estrogen-related receptor gamma (ERR gamma-2) (Estrogen receptor-related protein 3) (Nuclear receptor subfamily 3 group B member 3)
Q8WWI1	LMO7	LIM domain only protein 7 (LMO-7) (F-box only protein 20) (LOMP)
Q9ULG1	INO80	DNA helicase INO80 (hINO80) (EC 3.6.4.12) (INO80 complex subunit A) (Putative DNA helicase INO80 complex homolog 1)
Q9BWD1	ACAT2	Acetyl-CoA acetyltransferase, cytosolic (EC 2.3.1.9) (Acetyl-CoA transferase-like protein) (Cytosolic acetoacetyl-CoA thiolase)
C9JHX4	SLC30A3	Zinc transporter 3 (Fragment)
P09110	ACAA1	3-ketoacyl-CoA thiolase, peroxisomal (EC 2.3.1.16) (Acetyl-CoA acyltransferase) (Beta-ketothiolase) (Peroxisomal 3-oxoacyl-CoA thiolase)
Q9BQ69	MACROD1	O-acetyl-ADP-ribose deacetylase MACROD1 (EC 3.2.2.-) (EC 3.5.1.-) (MACRO domain-containing protein 1) (Protein LRP16) ([Protein ADP-ribosylglutamate] hydrolase)
P54725	RAD23A	UV excision repair protein RAD23 homolog A (HR23A) (hHR23A)
S4R2Y5	PTPRE	Receptor-type tyrosine-protein phosphatase epsilon
O14641	DVL2	Segment polarity protein dishevelled homolog DVL-2 (Dishevelled-2) (DSH homolog 2)
P22303	ACHE	Acetylcholinesterase (AChE) (EC 3.1.1.7)
P21709	EPHA1	Ephrin type-A receptor 1 (hEpha1) (EC 2.7.10.1) (EPH tyrosine kinase) (EPH tyrosine kinase 1) (Erythropoietin-producing hepatoma receptor) (Tyrosine-protein kinase receptor EPH)
E5RG50	DMGDH	Dimethylglycine dehydrogenase, mitochondrial
Q07444	KLRC3	NKG2-E type II integral membrane protein (NK cell receptor E) (NKG2-E-activating NK receptor)
Q15077	P2RY6	P2Y purinoceptor 6 (P2Y6)
H7C3P1		Deleted.
A0A0U1RQZ9	SMARCA2	Probable global transcription activator SNF2L2
C9J164	RAPH1	Ras-associated and pleckstrin homology domains-containing protein 1
Q9P2J5	LARS	Leucine--tRNA ligase, cytoplasmic (EC 6.1.1.4) (Leucyl-tRNA synthetase) (LeuRS)
V9H0X6	CLEC11A	C-type lectin domain family 11 member A (C-type lectin domain family 11, member A, isoform CRA_c) (SCGF-beta)
E5RK15	DMGDH	Dimethylglycine dehydrogenase, mitochondrial
Q5T5L3	AQP7	Aquaporin-7 (Fragment)
A0A1B0GU07	CACNB4	Voltage-dependent L-type calcium channel subunit beta-4 (Fragment)
H0YDP9	PTPRK	Receptor-type tyrosine-protein phosphatase kappa (Fragment)
O75027	ABCB7	ATP-binding cassette sub-family B member 7, mitochondrial (ATP-binding cassette transporter 7) (ABC transporter 7 protein)
M0R0B3	PSG4	Pregnancy-specific beta-1-glycoprotein 4 (Fragment)
Q9ULJ8	PPP1R9A	Neurabin-1 (Neurabin-I) (Neural tissue-specific F-actin-binding protein I) (Protein phosphatase 1 regulatory subunit 9A)
P05023	ATP1A1	Sodium/potassium-transporting ATPase subunit alpha-1 (Na(+)/K(+) ATPase alpha-1 subunit) (EC 3.6.3.9) (Sodium pump subunit alpha-1)
Q7RTU0	TCF24	Transcription factor 24 (TCF-24)
C9JD58	WAC	WW domain-containing adapter protein with coiled-coil (Fragment)
Q5SQT3	H2AFY2	Histone H2A (Fragment)
Q13608	PEX6	Peroxisome assembly factor 2 (PAF-2) (Peroxin-6) (Peroxisomal biogenesis factor 6) (Peroxisomal-type ATPase 1)
A0A0A0MQX1	MYO10	Unconventional myosin-X
A0A0G2JPA9	LILRB4	Leukocyte immunoglobulin-like receptor subfamily B member 4
O43699	SIGLEC6	Sialic acid-binding Ig-like lectin 6 (Siglec-6) (CD33 antigen-like 1) (CDw327) (Obesity-binding protein 1) (OB-BP1) (CD antigen CD327)
H9N1E7	FLT1	Vascular endothelial growth factor receptor 1 (p19FLT1)
A0A075B728	PECAM1	Platelet endothelial cell adhesion molecule (Fragment)
B4E124	ANKLE1	Ankyrin repeat and LEM domain-containing protein 1 (cDNA FLJ53264, highly similar to Ankyrin repeat domain-containing protein 41)
P22307	SCP2	Non-specific lipid-transfer protein (NSL-TP) (EC 2.3.1.176) (Propanoyl-CoA C-acyltransferase) (SCP-chi) (SCPX) (Sterol carrier protein 2) (SCP-2) (Sterol carrier protein X) (SCP-X)
Q5TBG4	NEK6	Serine/threonine-protein kinase Nek6 (Fragment)
F5H783	STIP1	Stress-induced-phosphoprotein 1
A0A087X105		Deleted.
Q5SQ64	LY6G6F	Lymphocyte antigen 6 complex locus protein G6f
Q8WYQ9	ZCCHC14	Zinc finger CCHC domain-containing protein 14 (BDG-29)
P00742	F10	Coagulation factor X (EC 3.4.21.6) (Stuart factor) (Stuart-Prower factor) [Cleaved into: Factor X light chain; Factor X heavy chain; Activated factor Xa heavy chain]
Q86YT9	JAML	Junctional adhesion molecule-like (Adhesion molecule interacting with CXADR antigen 1) (Dendritic cell-specific protein CREA7-1)
Q9NS66	GPR173	Probable G-protein coupled receptor 173 (Super conserved receptor expressed in brain 3)
E9PBU7	SDCBP	Syntenin-1
A0A0B4J1W1	LILRB1	Leukocyte immunoglobulin-like receptor subfamily B member 1
Q9BQI3	EIF2AK1	Eukaryotic translation initiation factor 2-alpha kinase 1 (EC 2.7.11.1) (Heme-controlled repressor) (HCR) (Heme-regulated eukaryotic initiation factor eIF-2-alpha kinase) (Heme-regulated inhibitor) (Hemin-sensitive initiation factor 2-alpha kinase)
Q92859	NEO1	Neogenin (Immunoglobulin superfamily DCC subclass member 2)
A0A0H2UH41	POTEM	Putative POTE ankyrin domain family member M
A0A140T9R5	NOTCH4	NOTCH4 (Neurogenic locus notch homolog protein 4)
A0A087WYV9	SYNJ2BP-COX16	SYNJ2BP-COX16 readthrough
A0A1B0GW91	TCF4	Transcription factor 4
C9JAK5	ARF4	ADP-ribosylation factor 4
C9JG19	CXCR2	C-X-C chemokine receptor type 2 (Fragment)
O96013	PAK4	Serine/threonine-protein kinase PAK 4 (EC 2.7.11.1) (p21-activated kinase 4) (PAK-4)
E9PCY5	TOP2B	DNA topoisomerase 2 (EC 5.99.1.3) (Fragment)
B0QY71	MAFF	Transcription factor MafF (Fragment)
A0A075B7B4	IKBKE	Inhibitor of nuclear factor kappa-B kinase subunit epsilon
Q9P126	CLEC1B	C-type lectin domain family 1 member B (C-type lectin-like receptor 2) (CLEC-2)
Q9UQM7	CAMK2A	Calcium/calmodulin-dependent protein kinase type II subunit alpha (CaM kinase II subunit alpha) (CaMK-II subunit alpha) (EC 2.7.11.17)
Q8WXK4	ASB12	Ankyrin repeat and SOCS box protein 12 (ASB-12)
F5GYA3	TMPRSS5	Transmembrane protease serine 5
Q12864	CDH17	Cadherin-17 (Intestinal peptide-associated transporter HPT-1) (Liver-intestine cadherin) (LI-cadherin)
Q13322	GRB10	Growth factor receptor-bound protein 10 (GRB10 adapter protein) (Insulin receptor-binding protein Grb-IR)
F5H5P4	VAV1	Proto-oncogene vav
E5RFI8	SNX31	Sorting nexin-31 (Fragment)
P15498	VAV1	Proto-oncogene vav
A0A0U1RQV9	PRSS22	Brain-specific serine protease 4
Q9Y4K1	CRYBG1	Beta/gamma crystallin domain-containing protein 1 (Absent in melanoma 1 protein)
D6RB49	DTHD1	Death domain-containing protein 1
A0A0A0MRT2	WAC	WW domain-containing adapter protein with coiled-coil
P98174	FGD1	FYVE, RhoGEF and PH domain-containing protein 1 (Faciogenital dysplasia 1 protein) (Rho/Rac guanine nucleotide exchange factor FGD1) (Rho/Rac GEF) (Zinc finger FYVE domain-containing protein 3)
J3KSJ4	RARA	Retinoic acid receptor alpha (Fragment)
P62330	ARF6	ADP-ribosylation factor 6
A0A140T9P9	HLA-F	HLA class I histocompatibility antigen, alpha chain F (Fragment)
Q9H2A3	NEUROG2	Neurogenin-2 (NGN-2) (Class A basic helix-loop-helix protein 8) (bHLHa8) (Protein atonal homolog 4)
A0A140T9J8	HLA-F	HLA class I histocompatibility antigen, alpha chain F (Fragment)
P06858	LPL	Lipoprotein lipase (LPL) (EC 3.1.1.34)
S4R433	CPA1	Carboxypeptidase A1 (Fragment)
Q86VR7	VSIG10L	V-set and immunoglobulin domain-containing protein 10-like (VSIG10-like protein)
U3KQT1	ESD	S-formylglutathione hydrolase (Fragment)
A0A1B0GTZ1	SYT14	Synaptotagmin-14
Q9UKX2	MYH2	Myosin-2 (Myosin heavy chain 2) (Myosin heavy chain 2a) (MyHC-2a) (Myosin heavy chain IIa) (MyHC-IIa) (Myosin heavy chain, skeletal muscle, adult 2)
Q14517	FAT1	Protocadherin Fat 1 (Cadherin family member 7) (Cadherin-related tumor suppressor homolog) (Protein fat homolog) [Cleaved into: Protocadherin Fat 1, nuclear form]
M0R0A9	FCGRT	IgG receptor FcRn large subunit p51
A6NGD5	ZSCAN5C	Putative zinc finger and SCAN domain-containing protein 5C (Zinc finger and SCAN domain-containing protein 5C pseudogene)
P18464	HLA-B	HLA class I histocompatibility antigen, B-51 alpha chain (MHC class I antigen B*51)
P59901	LILRA4	Leukocyte immunoglobulin-like receptor subfamily A member 4 (CD85 antigen-like family member G) (Immunoglobulin-like transcript 7) (ILT-7) (CD antigen CD85g)
P53634	CTSC	Dipeptidyl peptidase 1 (EC 3.4.14.1) (Cathepsin C) (Cathepsin J) (Dipeptidyl peptidase I) (DPP-I) (DPPI) (Dipeptidyl transferase) [Cleaved into: Dipeptidyl peptidase 1 exclusion domain chain (Dipeptidyl peptidase I exclusion domain chain); Dipeptidyl peptidase 1 heavy chain (Dipeptidyl peptidase I heavy chain); Dipeptidyl peptidase 1 light chain (Dipeptidyl peptidase I light chain)]
A0A0C4DG95	PXK	PX domain-containing protein kinase-like protein
A0A0G2JNW2	PTPRC	Receptor-type tyrosine-protein phosphatase C (Fragment)
E9PNZ4	MACF1	Microtubule-actin cross-linking factor 1, isoforms 1/2/3/5 (Fragment)
P13569	CFTR	Cystic fibrosis transmembrane conductance regulator (CFTR) (ATP-binding cassette sub-family C member 7) (Channel conductance-controlling ATPase) (EC 3.6.3.49) (cAMP-dependent chloride channel)
A0A140T9H3	HLA-B	HLA class I histocompatibility antigen, B-46 alpha chain (Fragment)
H0YBP3	GABRA6	Gamma-aminobutyric acid receptor subunit alpha-6 (Fragment)
Q8NDI1	EHBP1	EH domain-binding protein 1
Q9BVQ7	SPATA5L1	Spermatogenesis-associated protein 5-like protein 1
E5RHF2	COPS5	COP9 signalosome complex subunit 5 (Fragment)
J3KN34	PTPN3	Tyrosine-protein phosphatase non-receptor type (EC 3.1.3.48)
Q9BQY6	WFDC6	WAP four-disulfide core domain protein 6 (Putative protease inhibitor WAP6)
Q96L34	MARK4	MAP/microtubule affinity-regulating kinase 4 (EC 2.7.11.1) (MAP/microtubule affinity-regulating kinase-like 1)
P46089	GPR3	G-protein coupled receptor 3 (ACCA orphan receptor)
A0A0A0MR47	ZNF274	Neurotrophin receptor-interacting factor homolog
H0YKB1	TJP1	Tight junction protein 1 (Zona occludens 1), isoform CRA_d (Tight junction protein ZO-1)
A0A087WXL3	POLQ	DNA polymerase theta
Q9HCJ2	LRRC4C	Leucine-rich repeat-containing protein 4C (Netrin-G1 ligand) (NGL-1)
P01763	IGHV3-48	Immunoglobulin heavy variable 3-48 (Ig heavy chain V-III region WEA)
F8VSL2	PRKAG1	5'-AMP-activated protein kinase subunit gamma-1 (Fragment)
P55291	CDH15	Cadherin-15 (Cadherin-14) (Muscle cadherin) (M-cadherin)
A0A5B9	TRBC2	T-cell receptor beta-2 chain C region
F5H6A7	ASB8	Ankyrin repeat and SOCS box protein 8 (Fragment)
E9PDF6	MYO1B	Unconventional myosin-Ib
A2BF26	HLA-C	HLA class I histocompatibility antigen, Cw-6 alpha chain
A0A0G2JNW9	KIR2DL3	Killer cell immunoglobulin-like receptor 2DL3
Q13009	TIAM1	T-lymphoma invasion and metastasis-inducing protein 1 (TIAM-1)
Q92932	PTPRN2	Receptor-type tyrosine-protein phosphatase N2 (R-PTP-N2) (EC 3.1.3.-) (EC 3.1.3.48) (Islet cell autoantigen-related protein) (IAR) (ICAAR) (Phogrin) [Cleaved into: IA-2beta60]
H0YBZ1	PTK2	Focal adhesion kinase 1 (Fragment)
Q8TDD1	DDX54	ATP-dependent RNA helicase DDX54 (EC 3.6.4.13) (ATP-dependent RNA helicase DP97) (DEAD box RNA helicase 97 kDa) (DEAD box protein 54)
A0A0G2JMI3	IGHV1-69-2	Immunoglobulin heavy variable 1-69-2
M0R202	ZNF446	Zinc finger protein 446
C9JXS1	CD86	T-lymphocyte activation antigen CD86 (Fragment)
Q5SZC5	GDA	Guanine deaminase (Fragment)
J3QLH6	PSMC5	26S proteasome regulatory subunit 8 (Fragment)
A0A087WSY1	MUSK	Muscle, skeletal receptor tyrosine-protein kinase
X6R8H3	SGK2	Serine/threonine-protein kinase Sgk2
P10721	KIT	Mast/stem cell growth factor receptor Kit (SCFR) (EC 2.7.10.1) (Piebald trait protein) (PBT) (Proto-oncogene c-Kit) (Tyrosine-protein kinase Kit) (p145 c-kit) (v-kit Hardy-Zuckerman 4 feline sarcoma viral oncogene homolog) (CD antigen CD117)
W5RWE6	PXK	PX domain-containing protein kinase-like protein (PXK)
P37231	PPARG	Peroxisome proliferator-activated receptor gamma (PPAR-gamma) (Nuclear receptor subfamily 1 group C member 3)
A0A0G2JPU4	LILRB4	Leukocyte immunoglobulin-like receptor subfamily B member 4
B1APG2	PRKACB	cAMP-dependent protein kinase catalytic subunit beta (Fragment)
Q9UHY1	NRBP1	Nuclear receptor-binding protein
O94806	PRKD3	Serine/threonine-protein kinase D3 (EC 2.7.11.13) (Protein kinase C nu type) (Protein kinase EPK2) (nPKC-nu)
P01892	HLA-A	HLA class I histocompatibility antigen, A-2 alpha chain (MHC class I antigen A*2)
E9PR46	DDX25	ATP-dependent RNA helicase DDX25 (Fragment)
J3QR41	AURKB	Aurora kinase B (Fragment)
Q96PU5	NEDD4L	E3 ubiquitin-protein ligase NEDD4-like (EC 2.3.2.26) (HECT-type E3 ubiquitin transferase NED4L) (NEDD4.2) (Nedd4-2)
C9JZT5	BTN3A3	Butyrophilin subfamily 3 member A3 (Fragment)
P07204	THBD	Thrombomodulin (TM) (Fetomodulin) (CD antigen CD141)
H0YN29	CD276	CD276 antigen (Fragment)
Q9Y2T1	AXIN2	Axin-2 (Axin-like protein) (Axil) (Axis inhibition protein 2) (Conductin)
H7C420	SULT1C2	Sulfotransferase (EC 2.8.2.-) (Fragment)
A0A140T9E1	HLA-C	HLA class I histocompatibility antigen, Cw-6 alpha chain (Fragment)
A0A024RCN4	ZSCAN26	Zinc finger and SCAN domain-containing protein 26 (Zinc finger protein 187, isoform CRA_a)
J3KRF6	SPG7	Paraplegin (Fragment)
E9PMD8	PSMC3	26S proteasome regulatory subunit 6A (Fragment)
F8W809	TXNRD1	Thioredoxin reductase 1, cytoplasmic
E9PLY6	ECHDC1	Ethylmalonyl-CoA decarboxylase (Fragment)
E9PRI1	MUS81	Crossover junction endonuclease MUS81
E9PRV7	GRK2	G protein-coupled receptor kinase (EC 2.7.11.-)
P11474	ESRRA	Steroid hormone receptor ERR1 (Estrogen receptor-like 1) (Estrogen-related receptor alpha) (ERR-alpha) (Nuclear receptor subfamily 3 group B member 1)
E7EV50	GABRB2	Gamma-aminobutyric acid receptor subunit beta-2
H0YBS7	GABRA6	Gamma-aminobutyric acid receptor subunit alpha-6 (Fragment)
Q5T624	NASP	Nuclear autoantigenic sperm protein
F8WB46	CHRND	Acetylcholine receptor subunit delta
G3V3D8	CLMN	Calmin
P30685	HLA-B	HLA class I histocompatibility antigen, B-35 alpha chain (MHC class I antigen B*35)
I3L108	KCTD13	BTB/POZ domain-containing adapter for CUL3-mediated RhoA degradation protein 1
H7BZM6	SPEG	Striated muscle preferentially-expressed protein kinase (Fragment)
V9GYK4	CYP4A11	Cytochrome P450 4A11
Q9HD43	PTPRH	Receptor-type tyrosine-protein phosphatase H (R-PTP-H) (EC 3.1.3.48) (Stomach cancer-associated protein tyrosine phosphatase 1) (SAP-1) (Transmembrane-type protein-tyrosine phosphatase type H)
P22415	USF1	Upstream stimulatory factor 1 (Class B basic helix-loop-helix protein 11) (bHLHb11) (Major late transcription factor 1)
A0A1B0GUM4	CDKL5	Cyclin-dependent kinase-like 5
Q9H0M0	WWP1	NEDD4-like E3 ubiquitin-protein ligase WWP1 (EC 2.3.2.26) (Atrophin-1-interacting protein 5) (AIP5) (HECT-type E3 ubiquitin transferase WWP1) (TGIF-interacting ubiquitin ligase 1) (Tiul1) (WW domain-containing protein 1)
Q8TDM6	DLG5	Disks large homolog 5 (Discs large protein P-dlg) (Placenta and prostate DLG)
F5GYB3	FCRL6	Fc receptor-like protein 6 (Fragment)
F5H5X9	CDH7	Cadherin-7
A6NGN9	IGLON5	IgLON family member 5
P54707	ATP12A	Potassium-transporting ATPase alpha chain 2 (EC 3.6.3.10) (Non-gastric H(+)/K(+) ATPase subunit alpha) (Proton pump)
C9JCU6	MAP4K2	Mitogen-activated protein kinase kinase kinase kinase 2 (Fragment)
Q07889	SOS1	Son of sevenless homolog 1 (SOS-1)
A0A1B0GTK2	LIN28B	Protein lin-28 homolog B (Fragment)
F8WF29	FAP	Prolyl endopeptidase FAP
B7ZBU3	DDX59	Probable ATP-dependent RNA helicase DDX59 (Fragment)
Q8NE71	ABCF1	ATP-binding cassette sub-family F member 1 (ATP-binding cassette 50) (TNF-alpha-stimulated ABC protein)
Q8IWV2	CNTN4	Contactin-4 (Brain-derived immunoglobulin superfamily protein 2) (BIG-2)
Q9H8V3	ECT2	Protein ECT2 (Epithelial cell-transforming sequence 2 oncogene)
E9PP43	SORL1	Sortilin-related receptor
H3BPR3	SNX33	Sorting nexin-33 (Fragment)
Q9UPS8	ANKRD26	Ankyrin repeat domain-containing protein 26
A0A0D9SFF8	MPP2	MAGUK p55 subfamily member 2
F2Z3P7	ACAA1	3-ketoacyl-CoA thiolase, peroxisomal
Q9BVP2	GNL3	Guanine nucleotide-binding protein-like 3 (E2-induced gene 3 protein) (Novel nucleolar protein 47) (NNP47) (Nucleolar GTP-binding protein 3) (Nucleostemin)
Q5VXI4	ARHGEF10L	Rho guanine nucleotide exchange factor 10-like protein
C9JBS2	NR1H3	Oxysterols receptor LXR-alpha (Fragment)
A0A0A0MS08	IGHG1	Immunoglobulin heavy constant gamma 1 (Fragment)
J3KSK6	MICAL3	[F-actin]-monooxygenase MICAL3 (Fragment)
A0A1B0GTL5	RAB11FIP5	Rab11 family-interacting protein 5
O43143	DHX15	Pre-mRNA-splicing factor ATP-dependent RNA helicase DHX15 (EC 3.6.4.13) (ATP-dependent RNA helicase #46) (DEAH box protein 15)
H3BSK5	SIRPB1	Signal-regulatory protein beta-1 (Fragment)
Q9UBS0	RPS6KB2	Ribosomal protein S6 kinase beta-2 (S6K-beta-2) (S6K2) (EC 2.7.11.1) (70 kDa ribosomal protein S6 kinase 2) (P70S6K2) (p70-S6K 2) (S6 kinase-related kinase) (SRK) (Serine/threonine-protein kinase 14B) (p70 ribosomal S6 kinase beta) (S6K-beta) (p70 S6 kinase beta) (p70 S6K-beta) (p70 S6KB) (p70-beta)
P07307	ASGR2	Asialoglycoprotein receptor 2 (ASGP-R 2) (ASGPR 2) (C-type lectin domain family 4 member H2) (Hepatic lectin H2) (HL-2)
C9JCM2	ZSCAN30	Zinc finger and SCAN domain-containing protein 30
Q5T8R4	SLC16A1	Monocarboxylate transporter 1 (Fragment)
A0A0A6YYA8	CHRFAM7A	CHRNA7-FAM7A fusion protein
C9J798	RASA4B	Ras GTPase-activating protein 4B
X6R549	EBF4	Transcription factor COE4 (Fragment)
P00450	CP	Ceruloplasmin (EC 1.16.3.1) (Ferroxidase)
B4DV12	UBB	Polyubiquitin-B (cDNA FLJ51326, highly similar to Homo sapiens ubiquitin B (UBB), mRNA)
C9IZ08	GAPVD1	GTPase-activating protein and VPS9 domain-containing protein 1 (Fragment)
A0A0G2JMB4	TRBC2	T-cell receptor beta-2 chain C region (Fragment)
P35544	FAU	Ubiquitin-like protein FUBI
A0A0G2JMC1	CHRFAM7A	CHRNA7-FAM7A fusion protein
P98187	CYP4F8	Cytochrome P450 4F8 (EC 1.14.14.1) (CYPIVF8)
P09884	POLA1	DNA polymerase alpha catalytic subunit (EC 2.7.7.7) (DNA polymerase alpha catalytic subunit p180)
O95271	TNKS	Tankyrase-1 (TANK1) (EC 2.4.2.30) (ADP-ribosyltransferase diphtheria toxin-like 5) (ARTD5) (Poly [ADP-ribose] polymerase 5A) (TNKS-1) (TRF1-interacting ankyrin-related ADP-ribose polymerase) (Tankyrase I)
C9JU48	ANKRD54	Ankyrin repeat domain-containing protein 54 (Fragment)
A0A0U1RQT2	PATJ	InaD-like protein
P35251	RFC1	Replication factor C subunit 1 (Activator 1 140 kDa subunit) (A1 140 kDa subunit) (Activator 1 large subunit) (Activator 1 subunit 1) (DNA-binding protein PO-GA) (Replication factor C 140 kDa subunit) (RF-C 140 kDa subunit) (RFC140) (Replication factor C large subunit)
I3L3Y6	MYO1C	Unconventional myosin-Ic (Fragment)
C9J9S3	PPP1CB	Serine/threonine-protein phosphatase (EC 3.1.3.16) (Fragment)
E9PHM2	LARS2	Probable leucine--tRNA ligase, mitochondrial
E9PBQ4	NR4A2	Nuclear receptor subfamily 4 group A member 2
P03951	F11	Coagulation factor XI (FXI) (EC 3.4.21.27) (Plasma thromboplastin antecedent) (PTA) [Cleaved into: Coagulation factor XIa heavy chain; Coagulation factor XIa light chain]
A0A0D9SEN1	FAP	Prolyl endopeptidase FAP
Q8N742	KIR2DL2	KIR2DL2 (Killer cell immunoglobulin-like receptor 2DL2) (Killer cell immunoglobulin-like receptor two domains long cytoplasmic tail 2)
A0A087WXQ7	POTEC	POTE ankyrin domain family member C
I3L2H5	PLK1	Serine/threonine-protein kinase PLK1 (Fragment)
U3KQJ2	TJP2	Tight junction protein ZO-2 (Fragment)
Q96PR1	KCNC2	Potassium voltage-gated channel subfamily C member 2 (Shaw-like potassium channel) (Voltage-gated potassium channel Kv3.2)
H7C5T4	SLC37A3	Sugar phosphate exchanger 3 (Fragment)
H7C5S1	NFKBIZ	NF-kappa-B inhibitor zeta (Fragment)
Q08289	CACNB2	Voltage-dependent L-type calcium channel subunit beta-2 (CAB2) (Calcium channel voltage-dependent subunit beta 2) (Lambert-Eaton myasthenic syndrome antigen B) (MYSB)
P19320	VCAM1	Vascular cell adhesion protein 1 (V-CAM 1) (VCAM-1) (INCAM-100) (CD antigen CD106)
F5H6S1	KDM6A	Lysine-specific demethylase 6A
A0A087X2C1	SNX20	Sorting nexin-20
D6RC97	MCTP1	Multiple C2 and transmembrane domain-containing protein 1 (Fragment)
K7ERD8	MAPRE2	Microtubule-associated protein RP/EB family member 2 (Fragment)
O60682	MSC	Musculin (Activated B-cell factor 1) (ABF-1) (Class A basic helix-loop-helix protein 22) (bHLHa22)
Q4G0X4	KCTD21	BTB/POZ domain-containing protein KCTD21 (KCASH2 protein) (Potassium channel tetramerization domain-containing protein 21)
E7EV27	CPNE1	Copine-1
P23280	CA6	Carbonic anhydrase 6 (EC 4.2.1.1) (Carbonate dehydratase VI) (Carbonic anhydrase VI) (CA-VI) (Salivary carbonic anhydrase) (Secreted carbonic anhydrase)
A0A140TA05	HLA-C	HLA class I histocompatibility antigen, Cw-6 alpha chain
H7C560	BRAF	Serine/threonine-protein kinase B-raf (Fragment)
A0A087WWR5	GBA3	Cytosolic beta-glucosidase
F5H228	TRIO	Triple functional domain protein
A6NEM5	PIGK	GPI-anchor transamidase
Q14644	RASA3	Ras GTPase-activating protein 3 (GAP1(IP4BP)) (Ins P4-binding protein)
A0A0D9SG57	UTRN	Utrophin (Fragment)
H0YBK2	FAT2	Protocadherin Fat 2 (Fragment)
Q8IYD8	FANCM	Fanconi anemia group M protein (Protein FACM) (EC 3.6.4.13) (ATP-dependent RNA helicase FANCM) (Fanconi anemia-associated polypeptide of 250 kDa) (FAAP250) (Protein Hef ortholog)
H0YJM5	RPS6KL1	Ribosomal protein S6 kinase-like 1 (Fragment)
Q5T382	DBH	Dopamine beta-hydroxylase (Fragment)
Q8N468	MFSD4A	Major facilitator superfamily domain-containing protein 4A (Major facilitator superfamily domain-containing protein 4)
E9PIC1	LTB4R2	Leukotriene B4 receptor 2 (Fragment)
Q92974	ARHGEF2	Rho guanine nucleotide exchange factor 2 (Guanine nucleotide exchange factor H1) (GEF-H1) (Microtubule-regulated Rho-GEF) (Proliferating cell nucleolar antigen p40)
B5MD38	HADHB	Trifunctional enzyme subunit beta, mitochondrial
Q9HB75	PIDD1	p53-induced death domain-containing protein 1 (Leucine-rich repeat and death domain-containing protein)
C9JU32	ESRRG	Estrogen-related receptor gamma (Fragment)
Q15555	MAPRE2	Microtubule-associated protein RP/EB family member 2 (APC-binding protein EB2) (End-binding protein 2) (EB2)
Q9NR20	DYRK4	Dual specificity tyrosine-phosphorylation-regulated kinase 4 (EC 2.7.12.1)
I3NI09	CLEC10A	C-type lectin domain family 10 member A (Fragment)
P40939	HADHA	Trifunctional enzyme subunit alpha, mitochondrial (78 kDa gastrin-binding protein) (TP-alpha) [Includes: Long-chain enoyl-CoA hydratase (EC 4.2.1.17); Long chain 3-hydroxyacyl-CoA dehydrogenase (EC 1.1.1.211)]
A8MVX0	ARHGEF33	Rho guanine nucleotide exchange factor 33
H0Y5W8	SBF1	Myotubularin-related protein 5 (Fragment)
A0A0G2JJ84	BTNL2	Butyrophilin-like protein 2
A0A087X1B6	AR	Androgen receptor
P00519	ABL1	Tyrosine-protein kinase ABL1 (EC 2.7.10.2) (Abelson murine leukemia viral oncogene homolog 1) (Abelson tyrosine-protein kinase 1) (Proto-oncogene c-Abl) (p150)
Q68DC2	ANKS6	Ankyrin repeat and SAM domain-containing protein 6 (Ankyrin repeat domain-containing protein 14) (SamCystin) (Sterile alpha motif domain-containing protein 6) (SAM domain-containing protein 6)
E9PM99	ZNF202	Zinc finger protein 202 (Fragment)
P15172	MYOD1	Myoblast determination protein 1 (Class C basic helix-loop-helix protein 1) (bHLHc1) (Myogenic factor 3) (Myf-3)
X6RID7	CFAP70	Cilia- and flagella-associated protein 70 (Fragment)
E5RJ54	CHRNA2	Neuronal acetylcholine receptor subunit alpha-2
E7EWI0	MAGI2	Membrane-associated guanylate kinase, WW and PDZ domain-containing protein 2
A8MWS1		Deleted.
E7EWP2	TRIO	Triple functional domain protein
F5H7I4	GABPB1	GA-binding protein subunit beta-1
E9PFX5	PPARG	Peroxisome proliferator-activated receptor gamma (PPAR-gamma) (Nuclear receptor subfamily 1 group C member 3)
H7BXK9	ABCB6	ATP-binding cassette sub-family B member 6, mitochondrial (Fragment)
P19532	TFE3	Transcription factor E3 (Class E basic helix-loop-helix protein 33) (bHLHe33)
Q29836	HLA-B	HLA class I histocompatibility antigen, B-67 alpha chain (MHC class I antigen B*67)
F5H562	ATP7B	Copper-transporting ATPase 2
A0A0G2JIU9	MOG	Myelin-oligodendrocyte glycoprotein
J3KRI5	CDH8	Cadherin-8
Q9H4D0	CLSTN2	Calsyntenin-2 (Alcadein-gamma) (Alc-gamma)
A0A0C4DFQ5	KLK4	Kallikrein 4 (Prostase, enamel matrix, prostate), isoform CRA_a (Kallikrein B1) (Kallikrein-4)
F8WBM7	F10	Coagulation factor X
D6RBX9	HAPLN1	Hyaluronan and proteoglycan link protein 1 (Fragment)
F8VNV8	CACNB3	Voltage-dependent L-type calcium channel subunit beta-3
Q07157	TJP1	Tight junction protein ZO-1 (Tight junction protein 1) (Zona occludens protein 1) (Zonula occludens protein 1)
A0A1B0GVR6	TCF4	Transcription factor 4
A0A075B720	USP8	Ubiquitin carboxyl-terminal hydrolase 8
Q99705	MCHR1	Melanin-concentrating hormone receptor 1 (MCH receptor 1) (MCH-R1) (MCHR-1) (G-protein coupled receptor 24) (MCH-1R) (MCH1R) (MCHR) (SLC-1) (Somatostatin receptor-like protein)
P09914	IFIT1	Interferon-induced protein with tetratricopeptide repeats 1 (IFIT-1) (Interferon-induced 56 kDa protein) (IFI-56K) (P56)
D6RGG9	CDK7	Cyclin-dependent kinase 7
P00374	DHFR	Dihydrofolate reductase (EC 1.5.1.3)
P41597	CCR2	C-C chemokine receptor type 2 (C-C CKR-2) (CC-CKR-2) (CCR-2) (CCR2) (Monocyte chemoattractant protein 1 receptor) (MCP-1-R) (CD antigen CD192)
A0A087X0A8	COL12A1	Collagen alpha-1(XII) chain
O75563	SKAP2	Src kinase-associated phosphoprotein 2 (Pyk2/RAFTK-associated protein) (Retinoic acid-induced protein 70) (SKAP55 homolog) (SKAP-55HOM) (SKAP-HOM) (Src family-associated phosphoprotein 2) (Src kinase-associated phosphoprotein 55-related protein) (Src-associated adapter protein with PH and SH3 domains)
Q5T3P9	LGALS8	Galectin (Fragment)
Q12955	ANK3	Ankyrin-3 (ANK-3) (Ankyrin-G)
A0A087X2B3	NRCAM	Neuronal cell adhesion molecule
E9PS97	PARVA	Alpha-parvin (Fragment)
Q15784	NEUROD2	Neurogenic differentiation factor 2 (NeuroD2) (Class A basic helix-loop-helix protein 1) (bHLHa1) (NeuroD-related factor) (NDRF)
K7EM03	MPPE1	Metallophosphoesterase 1 (Fragment)
F5GY18	ZSCAN2	Zinc finger and SCAN domain-containing protein 2
A0A087WSZ9	TRAV30	T cell receptor alpha variable 30
Q9Y283	INVS	Inversin (Inversion of embryo turning homolog) (Nephrocystin-2)
H0YIW2	ANAPC7	Anaphase-promoting complex subunit 7 (Fragment)
A0A140T908	HLA-F	HLA class I histocompatibility antigen, alpha chain F (Fragment)
A0A0G2JH37	TAPBP	Tapasin
A0A087WXY1	LARS	Leucine--tRNA ligase, cytoplasmic
Q9Y5F8	PCDHGB7	Protocadherin gamma-B7 (PCDH-gamma-B7)
A0A087WYP8	EPHB6	Ephrin type-B receptor 6 (Fragment)
A8MZF9	DRG2	Developmentally-regulated GTP-binding protein 2
Q12974	PTP4A2	Protein tyrosine phosphatase type IVA 2 (EC 3.1.3.48) (HU-PP-1) (OV-1) (PTP(CAAXII)) (Protein-tyrosine phosphatase 4a2) (Protein-tyrosine phosphatase of regenerating liver 2) (PRL-2)
Q14520	HABP2	Hyaluronan-binding protein 2 (EC 3.4.21.-) (Factor VII-activating protease) (Factor seven-activating protease) (FSAP) (Hepatocyte growth factor activator-like protein) (Plasma hyaluronan-binding protein) [Cleaved into: Hyaluronan-binding protein 2 50 kDa heavy chain; Hyaluronan-binding protein 2 50 kDa heavy chain alternate form; Hyaluronan-binding protein 2 27 kDa light chain; Hyaluronan-binding…
F5H1A3	TBK1	Serine/threonine-protein kinase TBK1 (Fragment)
Q9ULH0	KIDINS220	Kinase D-interacting substrate of 220 kDa (Ankyrin repeat-rich membrane-spanning protein)
Q99743	NPAS2	Neuronal PAS domain-containing protein 2 (Neuronal PAS2) (Basic-helix-loop-helix-PAS protein MOP4) (Class E basic helix-loop-helix protein 9) (bHLHe9) (Member of PAS protein 4) (PAS domain-containing protein 4)
Q96C94	PHLDB1	PHLDB1 protein
O14976	GAK	Cyclin-G-associated kinase (EC 2.7.11.1)
E9PPZ1	PDZD3	Na(+)/H(+) exchange regulatory cofactor NHE-RF4
O15169	AXIN1	Axin-1 (Axis inhibition protein 1) (hAxin)
E9PL09	RPS3	40S ribosomal protein S3
E9PP78	FOXRED1	FAD-dependent oxidoreductase domain-containing protein 1
Q5T4D3	TMTC4	Transmembrane and TPR repeat-containing protein 4
Q9HAC8	UBTD1	Ubiquitin domain-containing protein 1
Q96CM4	NXNL1	Nucleoredoxin-like protein 1 (Thioredoxin-like protein 6)
Q12774	ARHGEF5	Rho guanine nucleotide exchange factor 5 (Ephexin-3) (Guanine nucleotide regulatory protein TIM) (Oncogene TIM) (Transforming immortalized mammary oncogene) (p60 TIM)
P18507	GABRG2	Gamma-aminobutyric acid receptor subunit gamma-2 (GABA(A) receptor subunit gamma-2)
B7Z278	RAPGEF4	Rap guanine nucleotide exchange factor 4 (cDNA FLJ50956, highly similar to Rap guanine nucleotide exchange factor 4) (cDNA FLJ61771, highly similar to Rap guanine nucleotide exchange factor 4)
Q8TF21	ANKRD24	Ankyrin repeat domain-containing protein 24
Q92886	NEUROG1	Neurogenin-1 (NGN-1) (Class A basic helix-loop-helix protein 6) (bHLHa6) (Neurogenic basic-helix-loop-helix protein) (Neurogenic differentiation factor 3) (NeuroD3)
Q5HY54	FLNA	Filamin-A
A0A087X2I9	UTY	Histone demethylase UTY
Q7Z6J4	FGD2	FYVE, RhoGEF and PH domain-containing protein 2 (Zinc finger FYVE domain-containing protein 4)
G3V4C0	CLMN	Calmin (Fragment)
A0A0D9SFH5	DOCK9	Dedicator of cytokinesis protein 9
O95219	SNX4	Sorting nexin-4
F8WBE2	CYP20A1	Cytochrome P450 20A1
Q9NUP9	LIN7C	Protein lin-7 homolog C (Lin-7C) (Mammalian lin-seven protein 3) (MALS-3) (Vertebrate lin-7 homolog 3) (Veli-3)
A0A0U1RQR3	PATJ	InaD-like protein (Fragment)
A0A5C1	TRBV24-1	T cell receptor beta variable 24-1 (V_segment translation product) (Fragment)
A0A1B0GX12	TRBV12-4	T cell receptor beta variable 12-4 (Fragment)
B0QYX1	PPARA	Peroxisome proliferator-activated receptor alpha (Fragment)
Q2TV78	MST1L	Putative macrophage stimulating 1-like protein (Brain rescue factor 1) (BRF-1) (Hepatocyte growth factor-like protein homolog)
A0A140T9U0	HLA-C	HLA class I histocompatibility antigen, Cw-6 alpha chain
H0YMJ5	IGF1R	Insulin-like growth factor 1 receptor (Fragment)
D6RCE4	FAT1	Protocadherin Fat 1 (Fragment)
Q9GZQ6	NPFFR1	Neuropeptide FF receptor 1 (G-protein coupled receptor 147) (RFamide-related peptide receptor OT7T022)
Q8NEM8	AGBL3	Cytosolic carboxypeptidase 3 (EC 3.4.17.-) (ATP/GTP-binding protein-like 3)
P08F94	PKHD1	Fibrocystin (Polycystic kidney and hepatic disease 1 protein) (Polyductin) (Tigmin)
Q7RTX9	SLC16A14	Monocarboxylate transporter 14 (MCT 14) (Solute carrier family 16 member 14)
B9A012	MYO7A	Myosin VIIA, isoform CRA_a (Unconventional myosin-VIIa)
E9PMC0	PCSK7	Proprotein convertase subtilisin/kexin type 7 (Fragment)
Q8NE09	RGS22	Regulator of G-protein signaling 22 (RGS22)
Q9BPV8	P2RY13	P2Y purinoceptor 13 (P2Y13) (G-protein coupled receptor 86) (G-protein coupled receptor 94)
Q6GQY8	PPP1R12B	PPP1R12B protein (Protein phosphatase 1 regulatory subunit 12B)
A0A0G2JPR7	KIR2DS2	Killer cell immunoglobulin-like receptor 2DS2
C9J6S7	ZSCAN31	Zinc finger and SCAN domain-containing protein 31 (Fragment)
Q8IY21	DDX60	Probable ATP-dependent RNA helicase DDX60 (EC 3.6.4.13) (DEAD box protein 60)
A0A0A0MSE1	ERBB4	Receptor protein-tyrosine kinase (EC 2.7.10.1)
Q9NYL2	MAP3K20	Mitogen-activated protein kinase kinase kinase 20 (EC 2.7.11.25) (Human cervical cancer suppressor gene 4 protein) (HCCS-4) (Leucine zipper- and sterile alpha motif-containing kinase) (MLK-like mitogen-activated protein triple kinase) (Mitogen-activated protein kinase kinase kinase MLT) (Mixed lineage kinase-related kinase) (MLK-related kinase) (MRK) (Sterile alpha motif- and leucine zipper-conta…
Q6UVY6	MOXD1	DBH-like monooxygenase protein 1 (EC 1.14.17.-) (Monooxygenase X)
E7EX91	APBB3	Amyloid-beta A4 precursor protein-binding family B member 3
J3KPJ4	KLRC2	NKG2-C type II integral membrane protein
J3QKX5	MEP1B	Meprin A subunit (EC 3.4.24.-) (Endopeptidase-2)
A0A0G2JP64	LILRB1	Leukocyte immunoglobulin-like receptor subfamily B member 1
Q8IZT6	ASPM	Abnormal spindle-like microcephaly-associated protein (Abnormal spindle protein homolog) (Asp homolog)
H9KV53	AGBL2	Cytosolic carboxypeptidase 2
E7EMT5	CYP1A1	Cytochrome P450 (EC 1.14.14.1)
J3KQF5		Deleted.
Q13825	AUH	Methylglutaconyl-CoA hydratase, mitochondrial (EC 4.2.1.18) (AU-specific RNA-binding enoyl-CoA hydratase) (AU-binding protein/enoyl-CoA hydratase) (Itaconyl-CoA hydratase) (EC 4.2.1.56)
P01743	IGHV1-46	Immunoglobulin heavy variable 1-46 (Ig heavy chain V-I region DOT) (Ig heavy chain V-I region HG3) (Ig heavy chain V-I region Mot)
Q5JXL4	KCNG1	Potassium voltage-gated channel subfamily G member 1 (Fragment)
H0Y7Z9	PTPRF	Receptor-type tyrosine-protein phosphatase F (Fragment)
F6UYG0	WNK1	Serine/threonine-protein kinase WNK1
H7C5P0	WEE2	Wee1-like protein kinase 2 (Fragment)
P19235	EPOR	Erythropoietin receptor (EPO-R)
F5H1T4	ERBB2	Receptor tyrosine-protein kinase erbB-2
K7EKP9	DLG4	Disks large homolog 4 (Fragment)
M0QZJ2	CYP2B6	Cytochrome P450 2B6
A0A087X1V8	OVCH2	Ovochymase-2
O00159	MYO1C	Unconventional myosin-Ic (Myosin I beta) (MMI-beta) (MMIb)
I3L2W9	DVL2	Segment polarity protein dishevelled homolog DVL-2 (Fragment)
Q7L5N1	COPS6	COP9 signalosome complex subunit 6 (SGN6) (Signalosome subunit 6) (JAB1-containing signalosome subunit 6) (MOV34 homolog) (Vpr-interacting protein) (hVIP)
Q96SM3	CPXM1	Probable carboxypeptidase X1 (EC 3.4.17.-) (Metallocarboxypeptidase CPX-1)
B7ZBF6	CHEK2	Serine/threonine-protein kinase Chk2 (Fragment)
E5RG43	CA1	Carbonic anhydrase 1 (Fragment)
C9JST2	LILRB4	Leukocyte immunoglobulin-like receptor subfamily B member 4 (Fragment)
E5RIF9	CA1	Carbonic anhydrase 1 (Fragment)
P62760	VSNL1	Visinin-like protein 1 (VILIP) (VLP-1) (Hippocalcin-like protein 3) (HLP3)
M0R132	KLK10	Kallikrein-10 (Fragment)
Q9HCL0	PCDH18	Protocadherin-18
P49917	LIG4	DNA ligase 4 (EC 6.5.1.1) (DNA ligase IV) (Polydeoxyribonucleotide synthase [ATP] 4)
Q8TDS5	OXER1	Oxoeicosanoid receptor 1 (5-oxo-ETE G-protein coupled receptor) (G-protein coupled receptor 170) (G-protein coupled receptor R527) (G-protein coupled receptor TG1019)
P16188	HLA-A	HLA class I histocompatibility antigen, A-30 alpha chain (MHC class I antigen A*30)
O43861	ATP9B	Probable phospholipid-transporting ATPase IIB (EC 3.6.3.1) (ATPase class II type 9B)
A0A0U1RQP1	DNM1	Dynamin-1
E5RIC7	TOP1MT	DNA topoisomerase I, mitochondrial (Fragment)
A0A0B4J291	CDYL2	Chromodomain Y-like protein 2
P10321	HLA-C	HLA class I histocompatibility antigen, Cw-7 alpha chain (MHC class I antigen Cw*7)
J3KT86	AURKB	Aurora kinase B (Fragment)
E7ET55	ATP7B	Copper-transporting ATPase 2
Q99527	GPER1	G-protein coupled estrogen receptor 1 (Chemoattractant receptor-like 2) (Flow-induced endothelial G-protein coupled receptor 1) (FEG-1) (G protein-coupled estrogen receptor 1) (G-protein coupled receptor 30) (GPCR-Br) (IL8-related receptor DRY12) (Lymphocyte-derived G-protein coupled receptor) (LYGPR) (Membrane estrogen receptor) (mER)
Q8WW36	ZCCHC13	Zinc finger CCHC domain-containing protein 13
E9PFX0	HAVCR1	Hepatitis A virus cellular receptor 1
A0A0A0MSL1	DLG5	Disks large homolog 5 (Fragment)
P28340	POLD1	DNA polymerase delta catalytic subunit (EC 2.7.7.7) (EC 3.1.11.-) (DNA polymerase subunit delta p125)
P52735	VAV2	Guanine nucleotide exchange factor VAV2 (VAV-2)
I3L3D7	PRSS33	Serine protease 33 (Fragment)
O60566	BUB1B	Mitotic checkpoint serine/threonine-protein kinase BUB1 beta (EC 2.7.11.1) (MAD3/BUB1-related protein kinase) (hBUBR1) (Mitotic checkpoint kinase MAD3L) (Protein SSK1)
A0JD36	TRDV2	HDV102S1 (T cell receptor delta variable 2) (Fragment)
H3BR74	HAGHL	Hydroxyacylglutathione hydrolase-like protein (Fragment)
P41235	HNF4A	Hepatocyte nuclear factor 4-alpha (HNF-4-alpha) (Nuclear receptor subfamily 2 group A member 1) (Transcription factor 14) (TCF-14) (Transcription factor HNF-4)
Q96KV6	BTN2A3P	Putative butyrophilin subfamily 2 member A3
A0A087WWJ0	CACNB2	Voltage-dependent L-type calcium channel subunit beta-2
Q5H9U9	DDX60L	Probable ATP-dependent RNA helicase DDX60-like (EC 3.6.4.13) (DEAD box protein 60-like)
Q8N3K9	CMYA5	Cardiomyopathy-associated protein 5 (Dystrobrevin-binding protein 2) (Genethonin-3) (Myospryn) (SPRY domain-containing protein 2) (Tripartite motif-containing protein 76)
Q13838	DDX39B	Spliceosome RNA helicase DDX39B (EC 3.6.4.13) (56 kDa U2AF65-associated protein) (ATP-dependent RNA helicase p47) (DEAD box protein UAP56) (HLA-B-associated transcript 1 protein)
H0YM23	ANKRD17	Ankyrin repeat domain-containing protein 17 (Fragment)
Q9NNW7	TXNRD2	Thioredoxin reductase 2, mitochondrial (EC 1.8.1.9) (Selenoprotein Z) (SelZ) (TR-beta) (Thioredoxin reductase TR3)
Q6UB98	ANKRD12	Ankyrin repeat domain-containing protein 12 (Ankyrin repeat-containing cofactor 2) (GAC-1 protein)
Q96TA0	PCDHB18P	Putative protocadherin beta-18 (PCDH-beta-18) (PCDH-psi2)
D6RHZ8	MGAT1	Alpha-1,3-mannosyl-glycoprotein 2-beta-N-acetylglucosaminyltransferase (Fragment)
Q13387	MAPK8IP2	C-Jun-amino-terminal kinase-interacting protein 2 (JIP-2) (JNK-interacting protein 2) (Islet-brain-2) (IB-2) (JNK MAP kinase scaffold protein 2) (Mitogen-activated protein kinase 8-interacting protein 2)
Q06418	TYRO3	Tyrosine-protein kinase receptor TYRO3 (EC 2.7.10.1) (Tyrosine-protein kinase BYK) (Tyrosine-protein kinase DTK) (Tyrosine-protein kinase RSE) (Tyrosine-protein kinase SKY) (Tyrosine-protein kinase TIF)
A0A087WUZ3	SPTBN1	Spectrin beta chain
H7C0J0	CHL1	Neural cell adhesion molecule L1-like protein (Fragment)
D6RIF8	GAB1	GRB2-associated-binding protein 1 (Fragment)
A0A087WVN4	FDPS	Farnesyl pyrophosphate synthase (Fragment)
A0A0J9YYF1	TRBV7-4	T cell receptor beta variable 7-4 (Fragment)
A0A182DWI3	TXNRD1	Thioredoxin reductase 1, cytoplasmic
E7EME3	MRC2	C-type mannose receptor 2
E9PHI8	NEK11	Serine/threonine-protein kinase Nek11
P43632	KIR2DS4	Killer cell immunoglobulin-like receptor 2DS4 (CD158 antigen-like family member I) (MHC class I NK cell receptor) (Natural killer-associated transcript 8) (NKAT-8) (P58 natural killer cell receptor clones CL-39/CL-17) (p58 NK receptor CL-39/CL-17) (CD antigen CD158i)
[truncated: 10,479 more rows]

## Sheet: Pb_proteins
Entry	Gene names (primary )	Protein names
[truncated: 2,972 more rows]
