# Supplementary material for: Shared gene-network signatures between the human heavy metal proteome and neurological disorders and cancer types
Source: Royal Society of Chemistry journal article supplement (doi:10.1039/c8mt00271a), 2018-01-01
Supplement: c8mt00271a5.xlsx [file c8mt00271a5.xlsx]

## Sheet: Sheet1
Category	Term	%	PValue
KEGG_PATHWAY	hsa04010:MAPK signaling pathway	12.1602	7.65193e-46
KEGG_PATHWAY	hsa04014:Ras signaling pathway	10.5866	5.49449e-39
KEGG_PATHWAY	hsa05200:Pathways in cancer	8.86981	1.33982e-14
KEGG_PATHWAY	hsa04722:Neurotrophin signaling pathway	8.15451	4.94312e-40
KEGG_PATHWAY	hsa04015:Rap1 signaling pathway	7.86838	2.20319e-23
KEGG_PATHWAY	hsa04151:PI3K-Akt signaling pathway	7.01001	6.23084e-10
KEGG_PATHWAY	hsa04062:Chemokine signaling pathway	6.86695	4.36328e-20
KEGG_PATHWAY	hsa04510:Focal adhesion	6.86695	3.85505e-18
KEGG_PATHWAY	hsa05205:Proteoglycans in cancer	6.58083	3.7203e-17
KEGG_PATHWAY	hsa04012:ErbB signaling pathway	6.43777	1.89378e-33
KEGG_PATHWAY	hsa04144:Endocytosis	6.43777	3.70238e-12
KEGG_PATHWAY	hsa04921:Oxytocin signaling pathway	6.29471	8.7769e-20
KEGG_PATHWAY	hsa04912:GnRH signaling pathway	6.15165	7.27263e-30
KEGG_PATHWAY	hsa05169:Epstein-Barr virus infection	5.86552	3.10725e-14
KEGG_PATHWAY	hsa04068:FoxO signaling pathway	5.5794	2.93372e-18
KEGG_PATHWAY	hsa04611:Platelet activation	5.43634	7.30375e-18
KEGG_PATHWAY	hsa04660:T cell receptor signaling pathway	5.29328	9.90246e-21
KEGG_PATHWAY	hsa04664:Fc epsilon RI signaling pathway	5.15021	4.23702e-27
KEGG_PATHWAY	hsa04750:Inflammatory mediator regulation of TRP channels	5.15021	1.54494e-20
KEGG_PATHWAY	hsa04810:Regulation of actin cytoskeleton	5.15021	1.51831e-09
KEGG_PATHWAY	hsa04270:Vascular smooth muscle contraction	5.00715	1.47823e-16
KEGG_PATHWAY	hsa04910:Insulin signaling pathway	5.00715	2.24376e-14
KEGG_PATHWAY	hsa04020:Calcium signaling pathway	5.00715	6.09786e-11
KEGG_PATHWAY	hsa04360:Axon guidance	4.86409	1.0445e-14
KEGG_PATHWAY	hsa05164:Influenza A	4.86409	1.23666e-10
KEGG_PATHWAY	hsa05231:Choline metabolism in cancer	4.57797	3.64082e-16
KEGG_PATHWAY	hsa04550:Signaling pathways regulating pluripotency of stem cells	4.57797	7.04386e-12
KEGG_PATHWAY	hsa04024:cAMP signaling pathway	4.43491	1.93977e-07
KEGG_PATHWAY	hsa04914:Progesterone-mediated oocyte maturation	4.29185	2.8345e-16
KEGG_PATHWAY	hsa04380:Osteoclast differentiation	4.29185	3.48289e-11
KEGG_PATHWAY	hsa05160:Hepatitis C	4.29185	5.16739e-11
KEGG_PATHWAY	hsa05214:Glioma	4.14878	3.22303e-19
KEGG_PATHWAY	hsa04668:TNF signaling pathway	4.14878	7.6136e-13
KEGG_PATHWAY	hsa04071:Sphingolipid signaling pathway	4.14878	2.0155e-11
KEGG_PATHWAY	hsa04650:Natural killer cell mediated cytotoxicity	4.14878	3.08087e-11
KEGG_PATHWAY	hsa04310:Wnt signaling pathway	4.14878	6.65929e-10
KEGG_PATHWAY	hsa04370:VEGF signaling pathway	4.00572	5.9998e-19
KEGG_PATHWAY	hsa04620:Toll-like receptor signaling pathway	4.00572	5.09656e-12
KEGG_PATHWAY	hsa04919:Thyroid hormone signaling pathway	4.00572	3.22247e-11
KEGG_PATHWAY	hsa04666:Fc gamma R-mediated phagocytosis	3.86266	8.54207e-14
KEGG_PATHWAY	hsa05161:Hepatitis B	3.86266	4.17511e-08
KEGG_PATHWAY	hsa05152:Tuberculosis	3.86266	2.37579e-06
KEGG_PATHWAY	hsa05166:HTLV-I infection	3.86266	0.00124002
KEGG_PATHWAY	hsa05206:MicroRNAs in cancer	3.86266	0.0054601
KEGG_PATHWAY	hsa04720:Long-term potentiation	3.7196	1.19378e-15
KEGG_PATHWAY	hsa04540:Gap junction	3.7196	2.27046e-12
KEGG_PATHWAY	hsa04066:HIF-1 signaling pathway	3.7196	3.10861e-11
KEGG_PATHWAY	hsa04728:Dopaminergic synapse	3.7196	1.28488e-08
KEGG_PATHWAY	hsa05162:Measles	3.57654	1.24138e-07
KEGG_PATHWAY	hsa04150:mTOR signaling pathway	3.43348	5.23983e-15
KEGG_PATHWAY	hsa04916:Melanogenesis	3.43348	1.80776e-09
KEGG_PATHWAY	hsa04931:Insulin resistance	3.43348	8.86983e-09
KEGG_PATHWAY	hsa04114:Oocyte meiosis	3.43348	1.06946e-08
KEGG_PATHWAY	hsa04022:cGMP-PKG signaling pathway	3.43348	2.43653e-05
KEGG_PATHWAY	hsa05223:Non-small cell lung cancer	3.29041	2.62043e-14
KEGG_PATHWAY	hsa04730:Long-term depression	3.29041	1.41608e-13
KEGG_PATHWAY	hsa05220:Chronic myeloid leukemia	3.29041	9.84478e-12
KEGG_PATHWAY	hsa04925:Aldosterone synthesis and secretion	3.29041	1.30439e-10
KEGG_PATHWAY	hsa05215:Prostate cancer	3.29041	7.49744e-10
KEGG_PATHWAY	hsa04070:Phosphatidylinositol signaling system	3.29041	6.67803e-09
KEGG_PATHWAY	hsa05142:Chagas disease (American trypanosomiasis)	3.29041	2.14489e-08
KEGG_PATHWAY	hsa04725:Cholinergic synapse	3.29041	7.45481e-08
KEGG_PATHWAY	hsa05145:Toxoplasmosis	3.29041	2.32512e-07
KEGG_PATHWAY	hsa04530:Tight junction	3.29041	3.26832e-06
KEGG_PATHWAY	hsa04917:Prolactin signaling pathway	3.14735	5.89819e-11
KEGG_PATHWAY	hsa04915:Estrogen signaling pathway	3.14735	4.2978e-08
KEGG_PATHWAY	hsa04724:Glutamatergic synapse	3.14735	5.42524e-07
KEGG_PATHWAY	hsa04261:Adrenergic signaling in cardiomyocytes	3.14735	3.12349e-05
KEGG_PATHWAY	hsa05168:Herpes simplex infection	3.14735	0.000782336
KEGG_PATHWAY	hsa05230:Central carbon metabolism in cancer	3.00429	5.58105e-11
KEGG_PATHWAY	hsa05212:Pancreatic cancer	3.00429	7.66911e-11
KEGG_PATHWAY	hsa04726:Serotonergic synapse	3.00429	1.46233e-06
KEGG_PATHWAY	hsa04670:Leukocyte transendothelial migration	3.00429	3.93174e-06
KEGG_PATHWAY	hsa05120:Epithelial cell signaling in Helicobacter pylori infection	2.86123	1.09884e-09
KEGG_PATHWAY	hsa04662:B cell receptor signaling pathway	2.86123	1.90462e-09
KEGG_PATHWAY	hsa04922:Glucagon signaling pathway	2.86123	9.8961e-07
KEGG_PATHWAY	hsa04723:Retrograde endocannabinoid signaling	2.86123	1.36216e-06
KEGG_PATHWAY	hsa04390:Hippo signaling pathway	2.86123	0.000441592
KEGG_PATHWAY	hsa04060:Cytokine-cytokine receptor interaction	2.86123	0.0401878
KEGG_PATHWAY	hsa04520:Adherens junction	2.71817	2.14802e-08
KEGG_PATHWAY	hsa04713:Circadian entrainment	2.71817	2.32614e-06
KEGG_PATHWAY	hsa05221:Acute myeloid leukemia	2.57511	2.64652e-09
KEGG_PATHWAY	hsa05211:Renal cell carcinoma	2.57511	3.22307e-08
KEGG_PATHWAY	hsa05218:Melanoma	2.57511	1.32606e-07
KEGG_PATHWAY	hsa04971:Gastric acid secretion	2.57511	2.04867e-07
KEGG_PATHWAY	hsa04350:TGF-beta signaling pathway	2.57511	1.71399e-06
KEGG_PATHWAY	hsa05203:Viral carcinogenesis	2.57511	0.0495491
KEGG_PATHWAY	hsa04064:NF-kappa B signaling pathway	2.43205	1.26901e-05
KEGG_PATHWAY	hsa04110:Cell cycle	2.43205	0.00093665
KEGG_PATHWAY	hsa04932:Non-alcoholic fatty liver disease (NAFLD)	2.43205	0.00702422
KEGG_PATHWAY	hsa05219:Bladder cancer	2.28898	1.22845e-09
KEGG_PATHWAY	hsa05131:Shigellosis	2.28898	9.87411e-07
KEGG_PATHWAY	hsa04920:Adipocytokine signaling pathway	2.28898	3.31835e-06
KEGG_PATHWAY	hsa00562:Inositol phosphate metabolism	2.28898	4.0041e-06
KEGG_PATHWAY	hsa04911:Insulin secretion	2.28898	3.94131e-05
KEGG_PATHWAY	hsa04152:AMPK signaling pathway	2.28898	0.00218739
KEGG_PATHWAY	hsa05213:Endometrial cancer	2.14592	3.65475e-07
KEGG_PATHWAY	hsa05210:Colorectal cancer	2.14592	3.66597e-06
KEGG_PATHWAY	hsa04622:RIG-I-like receptor signaling pathway	2.00286	7.45248e-05
KEGG_PATHWAY	hsa05132:Salmonella infection	2.00286	0.000439578
KEGG_PATHWAY	hsa04621:NOD-like receptor signaling pathway	1.8598	2.64946e-05
KEGG_PATHWAY	hsa05140:Leishmaniasis	1.71674	0.0013136
KEGG_PATHWAY	hsa04970:Salivary secretion	1.71674	0.00610248
KEGG_PATHWAY	hsa04340:Hedgehog signaling pathway	1.57368	6.71013e-07
KEGG_PATHWAY	hsa05031:Amphetamine addiction	1.57368	0.00255802
KEGG_PATHWAY	hsa05133:Pertussis	1.57368	0.00654367
KEGG_PATHWAY	hsa05032:Morphine addiction	1.57368	0.0237937
KEGG_PATHWAY	hsa00564:Glycerophospholipid metabolism	1.57368	0.0309973
KEGG_PATHWAY	hsa05146:Amoebiasis	1.57368	0.0584227
KEGG_PATHWAY	hsa04961:Endocrine and other factor-regulated calcium reabsorption	1.43062	0.000542584
KEGG_PATHWAY	hsa04930:Type II diabetes mellitus	1.43062	0.000890035
KEGG_PATHWAY	hsa04913:Ovarian steroidogenesis	1.43062	0.0010396
KEGG_PATHWAY	hsa04923:Regulation of lipolysis in adipocytes	1.43062	0.00274915
KEGG_PATHWAY	hsa04918:Thyroid hormone synthesis	1.43062	0.0121905
KEGG_PATHWAY	hsa04960:Aldosterone-regulated sodium reabsorption	1.28755	0.00092333
KEGG_PATHWAY	hsa05110:Vibrio cholerae infection	1.28755	0.00689638
KEGG_PATHWAY	hsa04924:Renin secretion	1.28755	0.0206596
KEGG_PATHWAY	hsa05222:Small cell lung cancer	1.28755	0.0859125
KEGG_PATHWAY	hsa05020:Prion diseases	1.14449	0.00156549
KEGG_PATHWAY	hsa04210:Apoptosis	1.14449	0.0477238
KEGG_PATHWAY	hsa05216:Thyroid cancer	1.00143	0.00386197
KEGG_PATHWAY	hsa05143:African trypanosomiasis	1.00143	0.00751055
KEGG_PATHWAY	hsa05014:Amyotrophic lateral sclerosis (ALS)	1.00143	0.0503423
KEGG_PATHWAY	hsa04140:Regulation of autophagy	0.858369	0.0563302
KEGG_PATHWAY	hsa00592:alpha-Linolenic acid metabolism	0.715308	0.0426496
KEGG_PATHWAY	hsa00591:Linoleic acid metabolism	0.715308	0.0677961
