# Supplementary material for: Shared gene-network signatures between the human heavy metal proteome and neurological disorders and cancer types
Source: Royal Society of Chemistry journal article supplement (doi:10.1039/c8mt00271a), 2018-01-01
Supplement: c8mt00271a6.xlsx [file c8mt00271a6.xlsx]

## Sheet: GWAS
Parkinson's	Alzheimer's Disease	Autism	Mult. Scler
RAB25	CR1	AMPD1	TTC34
SLC50A1	CTNNA2	TRIM33	KIF1B
RAB7L1	EDAR	EVI5	CD58
TMEM163	BIN1	VCAM1	CD58;
PHF5GP	MTND3P7	SLC30A7	RNASEL
INPP5D	SNAR-I-	MSNP1	RGS21
MCCC1	ANKRD55	MACROD2	C1orf106
MCC1	MEF2C	MIR137HG	TRNAI13
DGKQ	LOC100289673	RPS17P8	LOC100506047
GAK	SAP30L	ITIH3	PLEK
TMEM175	TRNAI25	TRIM26	MERTK
BST1	TREM2	PP1R11	SP140
FAM47E	CD2AP	SYNE1	EOMES
GPRIN3	ZNF292	CSMD1	NFKBIZ
SNCA	PDE7B	CACNB2	CBLB
HLA-DRA	MTHFD1L	ANK3	TIMMDC1
TRNAI25	BZW2	AS3MT	CD86
SLC2A13	NECAP1P1	CNNM2	SLC15A2
LRRK2	ZCWPW1	NT5C2	IL7R
CCDC62	EPHA1	TENM4	LINC00603
CRHR1	PTK2B	CACNA1C	LOC285626
SPPL2C	MIR6843	MAP1LC3P	HLAF
NSF	CLU	ASMT	TRNAI25
MAPT	GLIS3	RIPK2	HLA, DRA
	SPON1	ZNRD1	HLA-DRA
	CELF1	GLULP6	BTNL2
	MIR6503	CDH9	HLA-DRB6
	MS4A6A	MMP16	C6orf10
	MS4A2	CCDC68	BACH2
	GAB2		MRPS17P5
	PICALM		AHI1
	CRADD		IL20RA
	MYO16		BTF3L4P3
	FERMT2		rs1738074-C
	SLC24A4		rs1738074-G
	CLMN		rs1738074-A
	FLJ45256		ZNF767P
	CACNA1G		MIR1208
	BCAS3		MIR1204
	ABCA7		MLANA
	PVRL2		IL2RA
	TOMM40		ZMIZ1
	APOE		HHEX; EXOC6
	APOC1		TRNAA45P
	CD33		CD6
	TGM6		TNFRSF1A
	CASS4		CLECL1
			METTL1
			AGAP2
			ZFP36L1
			BATF
			GPR65
			CLEC16A
			MIR6774
			STAT3
			MALT1
			TNFSF14
			MPV17L2
			DKKL1
			NCOA5
			CYP24A1
			MAPK1
			ODF3B
			CMC1
			ZPLD1
			PVT1

## Sheet: Cancer Genome Atlas 
BLCA	BRCA	COADREAD	GBM	HNSC	KIRC	LAML	LUAD	LUSC	OV	UCEC	MULTI
ABTB1	AOC3	ACP1	A2M	APP	ANK3	ABL1	ANP32A	ARL4D	ABT1	ATF1	ACVR1B
ATF4	BCR	BCL2	ATF7IP	BRCA1	AR	ANKRD11	CBL	BRCA1	AXL	CDH6	AKT2
BRCA1	CAPN2	CAP1	ATXN1	CASP2	BCL3	BCR	CD226	C22orf46	BCL3	CDH9	BCL3
BTBD2	CASP3	CDK4	C2orf3	CAV1	BRCA1	CALM1	CXCR4	C2orf88	BLK	CDK5RAP3	C2
C7orf64	CSNK2A1	CRADD	CASP3	CD19	CHEK2	CNTNAP1	CYTH2	CTBP1	CALM3	CDKN1A	C3
CALM1	DRAP1	CTNNB1	CCDC6	CFLAR	CNTNAP1	CRKL	DHX9	DLL4	CASP3	CNOT3	CALR
CAMK2A	EDF1	DUSP19	CD40LG	CNKSR1	COL7A1	CSK	DOK1	ETS2	CCL18	CREBBP	CCNH
CBFB	EPHA3	DUSP4	CDH5	CRKL	CREBBP	CSNK2A2	EZR	GRIPAP1	DAB2	CSNK2A1	CFTR
CD44	EZH2	EEF1A1	COL4A2	DNMT1	CSNK2A1	DGKZ	FLT1	HDAC3	DRAP1	CTNNB1	CIITA
CD74	FOS	ESR2	DHFR	DUSP16	EP300	EP300	FUT4	HIF1A	EEF1A1	ESR1	CTGF
CEBPB	GTF2A1	FOXG1	DNAJC1	ELK1	FN1	ERBB4	GAB2	ING1	ESR1	FAF1	DDX5
CEBPG	HES5	GADD45G	DUSP1	ESR1	FOXM1	GAB2	GHR	JUN	ESR2	FGF2	DUT
CHEK1	HIPK2	GATAD2B	EFEMP2	FABP1	HBP1	GCSH	GNB2L1	LMO4	FASLG	FOS	ESR1
CSF1	IGF1R	ITGA7	EIF3G	FAM82A2	HDAC1	GUCY2C	GRB2	MED1	FCGR2A	FOXF2	HMGN1
DCP1B	JAK2	MAPK1	FAM46A	HSPA4	HGS	HSP90AA1	HNRNPC	MED15	FOS	GATA1	HRAS
EGFR	LEPR	MAPK3	FTL	JAK1	HMGA1	KCNQ5	ICAM3	MITF	GALNT10	GRIP1	ITGA4
EIF3D	MCM5	MAPK9	GJA1	KIF1A	IFI16	KIT	IL2RG	NCOA2	GTF2F2	GTF2A1	ITSN1
EIF3L	MYOD1	MYOC	HSPA1A	KRT8	ITGA8	LYN	INSR	NOTCH4	GZMB	GTF2B	JUN
EIF4EBP1	NFKBIA	PPP2R1A	HSPA5	MAP2K7	ITGB1	LYST	IRS1	NR3C1	HSP90AB1	HIPK1	KCNB1
ESR2	NFKBIB	PRKCE	HSPB8	MAPK1	KAT2A	MAPK1	ITGB2	OS9	IL2RG	HOXD4	KCNJ12
HDAC1	NKIRAS1	PSMD8	IER3	MAPK8	KAT5	MAPKAPK5	ITGB7	PIAS3	JUN	IRF3	LGALS8
HHEX	NKIRAS2	PTN	KIAA0408	MAPK8IP3	NCOA4	MATK	JAK2	POU1F1	KLF1	KLF5	LMO4
INSR	PKN2	RAB27A	LAMA4	MAPK9	NFKB1	MED28	KHDRBS1	PRKAR1A	LCK	LIG1	LRP1
JUN	PPP2R5A	RARA	MAPK3	MAPKAP1	PDGFRB	MME	KRT27	PSMD11	MUC1	MED25	LRPAP1
KPNB1	RAC1	RASL12	MPHOSPH6	MAPKSP1	PIAS1	MST1R	LCK	RARB	NOTCH4	NOS2	MAP2
MAPK1	REL	RXRA	NCL	MARK4	PIK3R1	NMI	LTK	RBBP7	PAX2	PAK1	MARK4
MMP7	RELA	SMAD2	NUP85	MDM2	PLK1	NPHS1	LYN	RBP1	PHKA1	PDPK1	MLL2
MRPL44	RPS6KA1	SMAD3	PIAS4	MED1	PTPRB	PELP1	MED28	RFC1	PPP3CA	POLR1B	MMP15
NIPSNAP3A	RXRA	ST13	PPP2CA	MFAP1	RAN	PIK3R1	NGFR	SAP30	PRKACA	PPP1R1B	MTCH2
PIAS3	SNAPC2	STMN2	RAD54L2	NR2C2	RANGAP1	PKD1	NPM1	SMAD2	RB1	PTEN	NEDD9
PSMD11	SPIB	TAL2	RCHY1	PPARG	RORA	PPEF2	PDGFRB	SMURF2	RSBN1	PTPRZ1	PDC
RUNX2	STAM2	TEX11	RIBC2	PRLR	RUNX1	PTPRA	PLSCR1	ST13	SHC1	PYGO1	PDIA3
SETDB1	STAT5A	TSN	SCAMP1	PXN	SHC1	RAF1	PPFIA1	TCF4	SMAD2	SLC18A2	PRKACA
SMAD2	TAF7L	TSNAX	SREBF1	RAF1	SRC	SRC	PRKCB	TPM2	SMAD4	SLC9A3R1	PTPN7
SMAD4	TBK1	TTR	TCF3	RAP1A	STAT2	STAT5B	PTPN6	VHL	TBP	SOX1	RPS6KA1
SNRNP70	TBP	ZCCHC10	TOP1	RASSF1	STAT3	STAT6	PTPRC	VHLL	TEAD1	SRC	RRAD
SOCS1	TP53		TOP2B	RB1	TEK	TNFRSF1A	RTN4R	ZNF675	TGFBR2	SS18L1	SLC9A6
ST5	TUBB		TP53	SRRM2	TELO2	TRAF1	SH2B3		TGM2	TAF4	SMAD2
TNFSF11	TYK2		UBE2A	TUBB	TRAF6	USHBP1	SH2D1A		TRIM27	TAF9	SNAP25
TUBA1A	VAV1		UBE2I	YWHAB	VPS37D	VCL	SHC1		TRIP4	THRA	TH
VCAN	XRCC4		VIM	YWHAG	ZBTB16	WAS	STAT5A		XBP1	TRAT1	TOP1
	ZYX		WWOX			YWHAZ	TRA2B		ZNF76
