# Supplementary material for: Shared gene-network signatures between the human heavy metal proteome and neurological disorders and cancer types
Source: Royal Society of Chemistry journal article supplement (doi:10.1039/c8mt00271a), 2018-01-01
Supplement: c8mt00271a7.xlsx [file c8mt00271a7.xlsx]

## Sheet: Heavy metal_neurological
Gene	Description
ESR1	estrogen receptor 1
ARAF	A-Raf proto-oncogene, serine/threonine kinase
MAP2K1	mitogen-activated protein kinase kinase 1
MAPK3	mitogen-activated protein kinase 3
BRAF	B-Raf proto-oncogene, serine/threonine kinase
RAF1	Raf-1 proto-oncogene, serine/threonine kinase
CREBBP	CREB binding protein

## Sheet: Heavy metal_Cancer
Gene	Description
GALNT10	polypeptide N-acetylgalactosaminyltransferase 10
NOTCH4	notch 4
GZMB	granzyme B
BLK	BLK proto-oncogene, Src family tyrosine kinase
AXL	AXL receptor tyrosine kinase
TGFBR2	transforming growth factor beta receptor 2
IL2RG	interleukin 2 receptor subunit gamma
LCK	LCK proto-oncogene, Src family tyrosine kinase
ESR1	estrogen receptor 1
PRKACA	protein kinase cAMP-activated catalytic subunit alpha
SHC1	SHC adaptor protein 1
HSP90AB1	heat shock protein 90kDa alpha family class B member 1
