# Supplementary material for: Shared gene-network signatures between the human heavy metal proteome and neurological disorders and cancer types
Source: Royal Society of Chemistry journal article supplement (doi:10.1039/c8mt00271a), 2018-01-01
Supplement: c8mt00271a8.xlsx [file c8mt00271a8.xlsx]

## Sheet: Gene_network_neurodiseases
GeneMANIA Results
Gene	Description
ESR1	estrogen receptor 1 [Source:HGNC Symbol;Acc:HGNC:3467]
ARAF	A-Raf proto-oncogene, serine/threonine kinase [Source:HGNC Symbol;Acc:HGNC:646]
MAP2K1	mitogen-activated protein kinase kinase 1 [Source:HGNC Symbol;Acc:HGNC:6840]
MAPK3	mitogen-activated protein kinase 3 [Source:HGNC Symbol;Acc:HGNC:6877]
BRAF	B-Raf proto-oncogene, serine/threonine kinase [Source:HGNC Symbol;Acc:HGNC:1097]
RAF1	Raf-1 proto-oncogene, serine/threonine kinase [Source:HGNC Symbol;Acc:HGNC:9829]
CREBBP	CREB binding protein [Source:HGNC Symbol;Acc:HGNC:2348]
MAP2K2	mitogen-activated protein kinase kinase 2 [Source:HGNC Symbol;Acc:HGNC:6842]
KRAS	KRAS proto-oncogene, GTPase [Source:HGNC Symbol;Acc:HGNC:6407]
TFF1	trefoil factor 1 [Source:HGNC Symbol;Acc:HGNC:11755]
HRAS	Harvey rat sarcoma viral oncogene homolog [Source:HGNC Symbol;Acc:HGNC:5173]
KSR1	kinase suppressor of ras 1 [Source:HGNC Symbol;Acc:HGNC:6465]
MAPK1	mitogen-activated protein kinase 1 [Source:HGNC Symbol;Acc:HGNC:6871]
PKM	pyruvate kinase, muscle [Source:HGNC Symbol;Acc:HGNC:9021]
PLAU	plasminogen activator, urokinase [Source:HGNC Symbol;Acc:HGNC:9052]
NRAS	neuroblastoma RAS viral oncogene homolog [Source:HGNC Symbol;Acc:HGNC:7989]
YWHAB	tyrosine 3-monooxygenase/tryptophan 5-monooxygenase activation protein beta [Source:HGNC Symbol;Acc:HGNC:12849]
KSR2	kinase suppressor of ras 2 [Source:HGNC Symbol;Acc:HGNC:18610]
YWHAH	tyrosine 3-monooxygenase/tryptophan 5-monooxygenase activation protein eta [Source:HGNC Symbol;Acc:HGNC:12853]
CNKSR1	connector enhancer of kinase suppressor of Ras 1 [Source:HGNC Symbol;Acc:HGNC:19700]
SOS1	SOS Ras/Rac guanine nucleotide exchange factor 1 [Source:HGNC Symbol;Acc:HGNC:11187]
STAT1	signal transducer and activator of transcription 1 [Source:HGNC Symbol;Acc:HGNC:11362]
BLVRA	biliverdin reductase A [Source:HGNC Symbol;Acc:HGNC:1062]
YWHAZ	tyrosine 3-monooxygenase/tryptophan 5-monooxygenase activation protein zeta [Source:HGNC Symbol;Acc:HGNC:12855]
HSPA1A	heat shock protein family A (Hsp70) member 1A [Source:HGNC Symbol;Acc:HGNC:5232]
RGS12	regulator of G-protein signaling 12 [Source:HGNC Symbol;Acc:HGNC:9994]
KHDRBS1	KH RNA binding domain containing, signal transduction associated 1 [Source:HGNC Symbol;Acc:HGNC:18116]
GO id	Description	q-value
GO:0000186	activation of MAPKK activity	1.35571e-16
GO:0007265	Ras protein signal transduction	1.5134e-14
GO:0007264	small GTPase mediated signal transduction	1.43606e-13
GO:0008543	fibroblast growth factor receptor signaling pathway	8.62899e-13
GO:0071774	response to fibroblast growth factor	1.31228e-12
GO:0044344	cellular response to fibroblast growth factor stimulus	1.31228e-12
GO:0008286	insulin receptor signaling pathway	1.32795e-11
GO:0071375	cellular response to peptide hormone stimulus	2.20218e-11
GO:0038095	Fc-epsilon receptor signaling pathway	2.20218e-11
GO:1901653	cellular response to peptide	2.20218e-11
GO:0043434	response to peptide hormone	2.84594e-11
GO:1901652	response to peptide	3.23153e-11
GO:0032869	cellular response to insulin stimulus	4.16185e-11
GO:0048011	neurotrophin TRK receptor signaling pathway	4.60533e-11
GO:0032868	response to insulin	4.60533e-11
GO:0038179	neurotrophin signaling pathway	4.8667e-11
GO:0032147	activation of protein kinase activity	9.11307e-11
GO:0007173	epidermal growth factor receptor signaling pathway	1.46715e-10
GO:0038127	ERBB signaling pathway	1.59959e-10
GO:0038093	Fc receptor signaling pathway	1.74532e-10
GO:0002768	immune response-regulating cell surface receptor signaling pathway	3.35964e-09
GO:0032386	regulation of intracellular transport	2.27109e-06
GO:0045022	early endosome to late endosome transport	1.16488e-05
GO:0004674	protein serine/threonine kinase activity	8.17738e-05
GO:0007030	Golgi organization	0.000321911
GO:0032872	regulation of stress-activated MAPK cascade	0.000417965
GO:0070371	ERK1 and ERK2 cascade	0.000417965
GO:0070302	regulation of stress-activated protein kinase signaling cascade	0.000420016
GO:0018105	peptidyl-serine phosphorylation	0.000476645
GO:0018209	peptidyl-serine modification	0.000581382
GO:0043406	positive regulation of MAP kinase activity	0.000609728
GO:0043410	positive regulation of MAPK cascade	0.000609728
GO:0070849	response to epidermal growth factor	0.000624405
