# Supplementary material for: Shared gene-network signatures between the human heavy metal proteome and neurological disorders and cancer types
Source: Royal Society of Chemistry journal article supplement (doi:10.1039/c8mt00271a), 2018-01-01
Supplement: c8mt00271a9.xlsx [file c8mt00271a9.xlsx]

## Sheet: Sheet1
GeneMANIA Results
Gene	Description
GALNT10	polypeptide N-acetylgalactosaminyltransferase 10 [Source:HGNC Symbol;Acc:HGNC:19873]
NOTCH4	notch 4 [Source:HGNC Symbol;Acc:HGNC:7884]
GZMB	granzyme B [Source:HGNC Symbol;Acc:HGNC:4709]
BLK	BLK proto-oncogene, Src family tyrosine kinase [Source:HGNC Symbol;Acc:HGNC:1057]
AXL	AXL receptor tyrosine kinase [Source:HGNC Symbol;Acc:HGNC:905]
TGFBR2	transforming growth factor beta receptor 2 [Source:HGNC Symbol;Acc:HGNC:11773]
IL2RG	interleukin 2 receptor subunit gamma [Source:HGNC Symbol;Acc:HGNC:6010]
LCK	LCK proto-oncogene, Src family tyrosine kinase [Source:HGNC Symbol;Acc:HGNC:6524]
ESR1	estrogen receptor 1 [Source:HGNC Symbol;Acc:HGNC:3467]
PRKACA	protein kinase cAMP-activated catalytic subunit alpha [Source:HGNC Symbol;Acc:HGNC:9380]
SHC1	SHC adaptor protein 1 [Source:HGNC Symbol;Acc:HGNC:10840]
HSP90AB1	heat shock protein 90kDa alpha family class B member 1 [Source:HGNC Symbol;Acc:HGNC:5258]
CD38	CD38 molecule [Source:HGNC Symbol;Acc:HGNC:1667]
PIK3R1	phosphoinositide-3-kinase regulatory subunit 1 [Source:HGNC Symbol;Acc:HGNC:8979]
SAFB	scaffold attachment factor B [Source:HGNC Symbol;Acc:HGNC:10520]
PIK3R2	phosphoinositide-3-kinase regulatory subunit 2 [Source:HGNC Symbol;Acc:HGNC:8980]
CSK	c-src tyrosine kinase [Source:HGNC Symbol;Acc:HGNC:2444]
PDE3A	phosphodiesterase 3A [Source:HGNC Symbol;Acc:HGNC:8778]
DLL4	delta like canonical Notch ligand 4 [Source:HGNC Symbol;Acc:HGNC:2910]
NCOA6	nuclear receptor coactivator 6 [Source:HGNC Symbol;Acc:HGNC:15936]
PLCG2	phospholipase C gamma 2 [Source:HGNC Symbol;Acc:HGNC:9066]
ADRB1	adrenoceptor beta 1 [Source:HGNC Symbol;Acc:HGNC:285]
IQGAP1	IQ motif containing GTPase activating protein 1 [Source:HGNC Symbol;Acc:HGNC:6110]
SERPINB9	serpin family B member 9 [Source:HGNC Symbol;Acc:HGNC:8955]
RASA1	RAS p21 protein activator 1 [Source:HGNC Symbol;Acc:HGNC:9871]
IL15RA	interleukin 15 receptor subunit alpha [Source:HGNC Symbol;Acc:HGNC:5978]
OSR1	odd-skipped related transciption factor 1 [Source:HGNC Symbol;Acc:HGNC:8111]
SKAP2	src kinase associated phosphoprotein 2 [Source:HGNC Symbol;Acc:HGNC:15687]
GAS6	growth arrest specific 6 [Source:HGNC Symbol;Acc:HGNC:4168]
ACVRL1	activin A receptor like type 1 [Source:HGNC Symbol;Acc:HGNC:175]
ENG	endoglin [Source:HGNC Symbol;Acc:HGNC:3349]
HCLS1	hematopoietic cell-specific Lyn substrate 1 [Source:HGNC Symbol;Acc:HGNC:4844]
GO id	Description	q-value
GO:0002768	immune response-regulating cell surface receptor signaling pathway	4.93147e-06
GO:0050851	antigen receptor-mediated signaling pathway	4.93147e-06
GO:0002429	immune response-activating cell surface receptor signaling pathway	4.93147e-06
GO:0030097	hemopoiesis	1.38806e-05
GO:0051251	positive regulation of lymphocyte activation	1.66416e-05
GO:0048534	hematopoietic or lymphoid organ development	1.66416e-05
GO:0002520	immune system development	1.85659e-05
GO:0002696	positive regulation of leukocyte activation	1.85659e-05
GO:0001569	patterning of blood vessels	1.85659e-05
GO:0050867	positive regulation of cell activation	1.95658e-05
GO:0001568	blood vessel development	3.94429e-05
GO:0051249	regulation of lymphocyte activation	6.05177e-05
GO:0060562	epithelial tube morphogenesis	8.01392e-05
GO:0006909	phagocytosis	8.01392e-05
GO:0035239	tube morphogenesis	9.38492e-05
GO:0002694	regulation of leukocyte activation	9.59003e-05
GO:0030971	receptor tyrosine kinase binding	0.000156169
GO:0050865	regulation of cell activation	0.000158053
GO:0002009	morphogenesis of an epithelium	0.000204625
GO:0048514	blood vessel morphogenesis	0.000274825
GO:0035295	tube development	0.000274825
GO:0050852	T cell receptor signaling pathway	0.000281824
GO:0071774	response to fibroblast growth factor	0.000371025
GO:0044344	cellular response to fibroblast growth factor stimulus	0.000371025
GO:0018108	peptidyl-tyrosine phosphorylation	0.000746442
GO:0007173	epidermal growth factor receptor signaling pathway	0.000746442
GO:0048729	tissue morphogenesis	0.000746442
GO:0018212	peptidyl-tyrosine modification	0.000746442
GO:0030168	platelet activation	0.000746442
GO:0038127	ERBB signaling pathway	0.000782816
GO:0038093	Fc receptor signaling pathway	0.000820901
GO:0002521	leukocyte differentiation	0.000954876
