# Supplementary material for: Shared gene-network signatures between the human heavy metal proteome and neurological disorders and cancer types
Source: Royal Society of Chemistry journal article supplement (doi:10.1039/c8mt00271a), 2018-01-01
Supplement: c8mt00271a10.xlsx [file c8mt00271a10.xlsx]

## Sheet: Zn_proteins in Cadmium
Entry	Gene names	Protein names
Q8TDZ2	MICAL1 MICAL NICAL	[F-actin]-monooxygenase MICAL1 (EC 1.14.13.225) (Molecule interacting with CasL protein 1) (MICAL-1) (NEDD9-interacting protein with calponin homology and LIM domains)
O94851	MICAL2 KIAA0750 MICAL2PV1 MICAL2PV2	[F-actin]-monooxygenase MICAL2 (EC 1.14.13.225) (Molecule interacting with CasL protein 2) (MICAL-2)
Q7RTP6	MICAL3 KIAA0819 KIAA1364	[F-actin]-monooxygenase MICAL3 (EC 1.14.13.225) (Molecule interacting with CasL protein 3) (MICAL-3)
J3KSK6	MICAL3	[F-actin]-monooxygenase MICAL3 (Fragment)
Q05823	RNASEL RNS4	2-5A-dependent ribonuclease (2-5A-dependent RNase) (EC 3.1.26.-) (Ribonuclease 4) (Ribonuclease L) (RNase L)
P61927	RPL37	60S ribosomal protein L37 (G1.16) (Large ribosomal subunit protein eL37)
P61513	RPL37A	60S ribosomal protein L37a (Large ribosomal subunit protein eL43)
Q9UHI8	ADAMTS1 KIAA1346 METH1	A disintegrin and metalloproteinase with thrombospondin motifs 1 (ADAM-TS 1) (ADAM-TS1) (ADAMTS-1) (EC 3.4.24.-) (METH-1)
Q9H324	ADAMTS10	A disintegrin and metalloproteinase with thrombospondin motifs 10 (ADAM-TS 10) (ADAM-TS10) (ADAMTS-10) (EC 3.4.24.-)
P58397	ADAMTS12 UNQ1918/PRO4389	A disintegrin and metalloproteinase with thrombospondin motifs 12 (ADAM-TS 12) (ADAM-TS12) (ADAMTS-12) (EC 3.4.24.-)
Q76LX8	ADAMTS13 C9orf8 UNQ6102/PRO20085	A disintegrin and metalloproteinase with thrombospondin motifs 13 (ADAM-TS 13) (ADAM-TS13) (ADAMTS-13) (EC 3.4.24.87) (von Willebrand factor-cleaving protease) (vWF-CP) (vWF-cleaving protease)
Q8WXS8	ADAMTS14	A disintegrin and metalloproteinase with thrombospondin motifs 14 (ADAM-TS 14) (ADAM-TS14) (ADAMTS-14) (EC 3.4.24.-)
Q8TE58	ADAMTS15	A disintegrin and metalloproteinase with thrombospondin motifs 15 (ADAM-TS 15) (ADAM-TS15) (ADAMTS-15) (EC 3.4.24.-)
Q8TE57	ADAMTS16 KIAA2029	A disintegrin and metalloproteinase with thrombospondin motifs 16 (ADAM-TS 16) (ADAM-TS16) (ADAMTS-16) (EC 3.4.24.-)
Q8TE56	ADAMTS17	A disintegrin and metalloproteinase with thrombospondin motifs 17 (ADAM-TS 17) (ADAM-TS17) (ADAMTS-17) (EC 3.4.24.-)
Q8TE60	ADAMTS18 ADAMTS21	A disintegrin and metalloproteinase with thrombospondin motifs 18 (ADAM-TS 18) (ADAM-TS18) (ADAMTS-18) (EC 3.4.24.-)
Q8TE59	ADAMTS19	A disintegrin and metalloproteinase with thrombospondin motifs 19 (ADAM-TS 19) (ADAM-TS19) (ADAMTS-19) (EC 3.4.24.-)
O95450	ADAMTS2 PCINP PCPNI	A disintegrin and metalloproteinase with thrombospondin motifs 2 (ADAM-TS 2) (ADAM-TS2) (ADAMTS-2) (EC 3.4.24.14) (Procollagen I N-proteinase) (PC I-NP) (Procollagen I/II amino propeptide-processing enzyme) (Procollagen N-endopeptidase) (pNPI)
P59510	ADAMTS20	A disintegrin and metalloproteinase with thrombospondin motifs 20 (ADAM-TS 20) (ADAM-TS20) (ADAMTS-20) (EC 3.4.24.-)
O15072	ADAMTS3 KIAA0366	A disintegrin and metalloproteinase with thrombospondin motifs 3 (ADAM-TS 3) (ADAM-TS3) (ADAMTS-3) (EC 3.4.24.-) (Procollagen II N-proteinase) (PC II-NP) (Procollagen II amino propeptide-processing enzyme)
O75173	ADAMTS4 KIAA0688 UNQ769/PRO1563	A disintegrin and metalloproteinase with thrombospondin motifs 4 (ADAM-TS 4) (ADAM-TS4) (ADAMTS-4) (EC 3.4.24.82) (ADMP-1) (Aggrecanase-1)
Q9UNA0	ADAMTS5 ADAMTS11 ADMP2	A disintegrin and metalloproteinase with thrombospondin motifs 5 (ADAM-TS 5) (ADAM-TS5) (ADAMTS-5) (EC 3.4.24.-) (A disintegrin and metalloproteinase with thrombospondin motifs 11) (ADAM-TS 11) (ADAMTS-11) (ADMP-2) (Aggrecanase-2)
Q9UKP5	ADAMTS6	A disintegrin and metalloproteinase with thrombospondin motifs 6 (ADAM-TS 6) (ADAM-TS6) (ADAMTS-6) (EC 3.4.24.-)
Q9UKP4	ADAMTS7	A disintegrin and metalloproteinase with thrombospondin motifs 7 (ADAM-TS 7) (ADAM-TS7) (ADAMTS-7) (EC 3.4.24.-) (COMPase)
Q9UP79	ADAMTS8 METH2	A disintegrin and metalloproteinase with thrombospondin motifs 8 (ADAM-TS 8) (ADAM-TS8) (ADAMTS-8) (EC 3.4.24.-) (METH-2) (METH-8)
Q9P2N4	ADAMTS9 KIAA1312	A disintegrin and metalloproteinase with thrombospondin motifs 9 (ADAM-TS 9) (ADAM-TS9) (ADAMTS-9) (EC 3.4.24.-)
Q9H2P0	ADNP ADNP1 KIAA0784	Activity-dependent neuroprotector homeobox protein (Activity-dependent neuroprotective protein)
O15204	ADAMDEC1	ADAM DEC1 (EC 3.4.24.-) (A disintegrin and metalloproteinase domain-like protein decysin-1) (ADAM-like protein decysin-1)
O95396	MOCS3 UBA4	Adenylyltransferase and sulfurtransferase MOCS3 (Molybdenum cofactor synthesis protein 3) (Molybdopterin synthase sulfurylase) (MPT synthase sulfurylase) [Includes: Molybdopterin-synthase adenylyltransferase (EC 2.7.7.80) (Adenylyltransferase MOCS3) (Sulfur carrier protein MOCS2A adenylyltransferase); Molybdopterin-synthase sulfurtransferase (EC 2.8.1.11) (Sulfur carrier protein MOCS2A sulfurtran…
Q8IUN7	ADH6	ADH6 protein (Alcohol dehydrogenase 6)
Q9Y4W6	AFG3L2	AFG3-like protein 2 (EC 3.4.24.-) (Paraplegin-like protein)
A0A087WTD7	AKAP13	A-kinase anchor protein 13
A8MYJ1	AKAP13	A-kinase anchor protein 13
Q12802	AKAP13 BRX HT31 LBC	A-kinase anchor protein 13 (AKAP-13) (AKAP-Lbc) (Breast cancer nuclear receptor-binding auxiliary protein) (Guanine nucleotide exchange factor Lbc) (Human thyroid-anchoring protein 31) (Lymphoid blast crisis oncogene) (LBC oncogene) (Non-oncogenic Rho GTPase-specific GTP exchange factor) (Protein kinase A-anchoring protein 13) (PRKA13) (p47)
P07327	ADH1A ADH1	Alcohol dehydrogenase 1A (EC 1.1.1.1) (Alcohol dehydrogenase subunit alpha)
D6RHZ6	ADH1B	Alcohol dehydrogenase 1B
P00325	ADH1B ADH2	Alcohol dehydrogenase 1B (EC 1.1.1.1) (Alcohol dehydrogenase subunit beta)
P00326	ADH1C ADH3	Alcohol dehydrogenase 1C (EC 1.1.1.1) (Alcohol dehydrogenase subunit gamma)
A0A0D9SFB5	ADH4	Alcohol dehydrogenase 4
P08319	ADH4	Alcohol dehydrogenase 4 (EC 1.1.1.1) (Alcohol dehydrogenase class II pi chain)
P28332	ADH6	Alcohol dehydrogenase 6 (EC 1.1.1.1)
D6RH17	ADH6	Alcohol dehydrogenase 6 (Fragment)
E9PFG0	ADH7	Alcohol dehydrogenase class 4 mu/sigma chain
A0A0C4DG85	ADH7	Alcohol dehydrogenase class 4 mu/sigma chain
P40394	ADH7	Alcohol dehydrogenase class 4 mu/sigma chain (EC 1.1.1.1) (Alcohol dehydrogenase class IV mu/sigma chain) (Gastric alcohol dehydrogenase) (Retinol dehydrogenase)
P11766	ADH5 ADHX FDH	Alcohol dehydrogenase class-3 (EC 1.1.1.1) (Alcohol dehydrogenase 5) (Alcohol dehydrogenase class chi chain) (Alcohol dehydrogenase class-III) (Glutathione-dependent formaldehyde dehydrogenase) (FALDH) (FDH) (GSH-FDH) (EC 1.1.1.-) (S-(hydroxymethyl)glutathione dehydrogenase) (EC 1.1.1.284)
H0YAG8	ADH5	Alcohol dehydrogenase class-3 (Fragment)
E7EWH7	CRYAA	Alpha-crystallin A chain
P02489	CRYAA CRYA1 HSPB4	Alpha-crystallin A chain (Heat shock protein beta-4) (HspB4) [Cleaved into: Alpha-crystallin A(1-172); Alpha-crystallin A(1-168); Alpha-crystallin A(1-162)]
A0A096LPJ9	CRYAA2	Alpha-crystallin A2 chain
A0A140G945	CRYAA2 CRYAA	Alpha-crystallin A2 chain [Cleaved into: Alpha-crystallin A2(1-172); Alpha-crystallin A2(1-168); Alpha-crystallin A2(1-162)]
P02511	CRYAB CRYA2 HSPB5	Alpha-crystallin B chain (Alpha(B)-crystallin) (Heat shock protein beta-5) (HspB5) (Renal carcinoma antigen NY-REN-27) (Rosenthal fiber component)
E9PJL7	CRYAB	Alpha-crystallin B chain (Fragment)
E9PR44	CRYAB	Alpha-crystallin B chain (Fragment)
P05067	APP A4 AD1	Amyloid-beta A4 protein (ABPP) (APPI) (APP) (Alzheimer disease amyloid protein) (Amyloid precursor protein) (Amyloid-beta precursor protein) (Cerebral vascular amyloid peptide) (CVAP) (PreA4) (Protease nexin-II) (PN-II) [Cleaved into: N-APP; Soluble APP-alpha (S-APP-alpha); Soluble APP-beta (S-APP-beta); C99 (Beta-secretase C-terminal fragment) (Beta-CTF); Amyloid-beta protein 42 (Abeta42) (Beta-…
P51693	APLP1	Amyloid-like protein 1 (APLP) (APLP-1) [Cleaved into: C30]
Q8TCF1	ZFAND1	AN1-type zinc finger protein 1
E5RIS3	ZFAND1	AN1-type zinc finger protein 1
Q8N6M9	ZFAND2A	AN1-type zinc finger protein 2A
J3KQ25	ZFAND2A	AN1-type zinc finger protein 2A
A8MYA3	ZFAND2A hCG_1744855	AN1-type zinc finger protein 2A (Zinc finger, AN1-type domain 2A, isoform CRA_b) (Fragment)
E9PFU9	ZFAND2B	AN1-type zinc finger protein 2B
B8ZZ56	ZFAND2B	AN1-type zinc finger protein 2B
A0A087X0D9	ZFAND2B	AN1-type zinc finger protein 2B
F8WEE4	ZFAND2B	AN1-type zinc finger protein 2B
Q8WV99	ZFAND2B AIRAPL	AN1-type zinc finger protein 2B (Arsenite-inducible RNA-associated protein-like protein) (AIRAP-like protein)
E7EV05	ZFAND2B	AN1-type zinc finger protein 2B (Fragment)
C9J1R6	ZFAND2B	AN1-type zinc finger protein 2B (Fragment)
E2QRF5	ZFAND3	AN1-type zinc finger protein 3
Q9H8U3	ZFAND3 TEX27	AN1-type zinc finger protein 3 (Testis-expressed protein 27)
J3KPC0	ZFAND4	AN1-type zinc finger protein 4
Q86XD8	ZFAND4 ANUBL1	AN1-type zinc finger protein 4 (AN1-type zinc finger and ubiquitin domain-containing protein-like 1)
O76080	ZFAND5 ZA20D2 ZNF216	AN1-type zinc finger protein 5 (Zinc finger A20 domain-containing protein 2) (Zinc finger protein 216)
Q6FIF0	ZFAND6 AWP1 ZA20D3 HT032	AN1-type zinc finger protein 6 (Associated with PRK1 protein) (Zinc finger A20 domain-containing protein 3)
H3BM82	ZFAND6	AN1-type zinc finger protein 6 (Fragment)
Q96II5	ARAF	ARAF protein (Serine/threonine-protein kinase A-Raf)
Q15027	ACAP1 CENTB1 KIAA0050	Arf-GAP with coiled-coil, ANK repeat and PH domain-containing protein 1 (Centaurin-beta-1) (Cnt-b1)
A0A087X1H5	ACAP2	Arf-GAP with coiled-coil, ANK repeat and PH domain-containing protein 2
Q15057	ACAP2 CENTB2 KIAA0041	Arf-GAP with coiled-coil, ANK repeat and PH domain-containing protein 2 (Centaurin-beta-2) (Cnt-b2)
A0A0U1RQT1	ACAP2	Arf-GAP with coiled-coil, ANK repeat and PH domain-containing protein 2 (Fragment)
Q96P50	ACAP3 CENTB5 KIAA1716	Arf-GAP with coiled-coil, ANK repeat and PH domain-containing protein 3 (Centaurin-beta-5) (Cnt-b5)
O75689	ADAP1 CENTA1	Arf-GAP with dual PH domain-containing protein 1 (Centaurin-alpha-1) (Cnt-a1) (Putative MAPK-activating protein PM25)
Q2V6Q1	ADAP2 CENTA2	Arf-GAP with dual PH domain-containing protein 2 (Centaurin alpha 2)
Q9NPF8	ADAP2 CENTA2	Arf-GAP with dual PH domain-containing protein 2 (Centaurin-alpha-2) (Cnt-a2)
J3QRD3	ADAP2	Arf-GAP with dual PH domain-containing protein 2 (Fragment)
F5GXM9	AGAP1	Arf-GAP with GTPase, ANK repeat and PH domain-containing protein 1
E7EUN2	AGAP1	Arf-GAP with GTPase, ANK repeat and PH domain-containing protein 1
A0A087X1U1	AGAP1	Arf-GAP with GTPase, ANK repeat and PH domain-containing protein 1
Q9UPQ3	AGAP1 CENTG2 KIAA1099	Arf-GAP with GTPase, ANK repeat and PH domain-containing protein 1 (AGAP-1) (Centaurin-gamma-2) (Cnt-g2) (GTP-binding and GTPase-activating protein 1) (GGAP1)
H7C0A7	AGAP1	Arf-GAP with GTPase, ANK repeat and PH domain-containing protein 1 (Fragment)
F8VVT9	AGAP2	Arf-GAP with GTPase, ANK repeat and PH domain-containing protein 2
Q99490	AGAP2 CENTG1 KIAA0167	Arf-GAP with GTPase, ANK repeat and PH domain-containing protein 2 (AGAP-2) (Centaurin-gamma-1) (Cnt-g1) (GTP-binding and GTPase-activating protein 2) (GGAP2) (Phosphatidylinositol 3-kinase enhancer) (PIKE)
J3KNM6	AGAP2	Arf-GAP with GTPase, ANK repeat and PH domain-containing protein 2 (Fragment)
Q96P47	AGAP3 CENTG3	Arf-GAP with GTPase, ANK repeat and PH domain-containing protein 3 (AGAP-3) (CRAM-associated GTPase) (CRAG) (Centaurin-gamma-3) (Cnt-g3) (MR1-interacting protein) (MRIP-1)
E7EU13	ARAP1	Arf-GAP with Rho-GAP domain, ANK repeat and PH domain-containing protein 1
Q96P48	ARAP1 CENTD2 KIAA0782	Arf-GAP with Rho-GAP domain, ANK repeat and PH domain-containing protein 1 (Centaurin-delta-2) (Cnt-d2)
Q8WZ64	ARAP2 CENTD1 KIAA0580	Arf-GAP with Rho-GAP domain, ANK repeat and PH domain-containing protein 2 (Centaurin-delta-1) (Cnt-d1) (Protein PARX)
G5E9Y3	ARAP3 CENTD3 hCG_1980706	Arf-GAP with Rho-GAP domain, ANK repeat and PH domain-containing protein 3 (Centaurin, delta 3, isoform CRA_b)
Q8WWN8	ARAP3 CENTD3	Arf-GAP with Rho-GAP domain, ANK repeat and PH domain-containing protein 3 (Centaurin-delta-3) (Cnt-d3)
Q9ULH1	ASAP1 DDEF1 KIAA1249	Arf-GAP with SH3 domain, ANK repeat and PH domain-containing protein 1 (130 kDa phosphatidylinositol 4,5-bisphosphate-dependent ARF1 GTPase-activating protein) (ADP-ribosylation factor-directed GTPase-activating protein 1) (ARF GTPase-activating protein 1) (Development and differentiation-enhancing factor 1) (DEF-1) (Differentiation-enhancing factor 1) (PIP2-dependent ARF1 GAP)
A0A0A0MRE5	ASAP1 DDEF1 hCG_2009092	Arf-GAP with SH3 domain, ANK repeat and PH domain-containing protein 1 (Development and differentiation enhancing factor 1, isoform CRA_b)
H0YBF7	ASAP1	Arf-GAP with SH3 domain, ANK repeat and PH domain-containing protein 1 (Fragment)
O43150	ASAP2 DDEF2 KIAA0400	Arf-GAP with SH3 domain, ANK repeat and PH domain-containing protein 2 (Development and differentiation-enhancing factor 2) (Paxillin-associated protein with ARF GAP activity 3) (PAG3) (Pyk2 C-terminus-associated protein) (PAP)
Q8TDY4	ASAP3 DDEFL1 UPLC1	Arf-GAP with SH3 domain, ANK repeat and PH domain-containing protein 3 (Development and differentiation-enhancing factor-like 1) (Protein up-regulated in liver cancer 1)
Q6HA08	ASTL	Astacin-like metalloendopeptidase (EC 3.4.-.-) (Oocyte astacin) (Ovastacin)
A0A087WXS7	ASNA1	ATPase ASNA1 (EC 3.6.-.-) (Arsenical pump-driving ATPase) (Arsenite-stimulated ATPase)
O43681	ASNA1 ARSA TRC40	ATPase ASNA1 (EC 3.6.-.-) (Arsenical pump-driving ATPase) (Arsenite-stimulated ATPase) (Transmembrane domain recognition complex 40 kDa ATPase subunit) (hARSA-I) (hASNA-I)
Q96S55	WRNIP1 WHIP	ATPase WRNIP1 (EC 3.6.1.3) (Werner helicase-interacting protein 1)
Q96TA2	YME1L1 FTSH1 YME1L UNQ1868/PRO4304	ATP-dependent zinc metalloprotease YME1L1 (EC 3.4.24.-) (ATP-dependent metalloprotease FtsH1) (Meg-4) (Presenilin-associated metalloprotease) (PAMP) (YME1-like protein 1)
Q16611	BAK1 BAK BCL2L7 CDN1	Bcl-2 homologous antagonist/killer (Apoptosis regulator BAK) (Bcl-2-like protein 7) (Bcl2-L-7)
B3VCF5	CHN2	Beta chimaerin isoform B1-CHNdel ex10-11 (Beta-chimaerin)
B3VCF6	CHN2	Beta chimaerin isoform B1-CHNdel ex11-12 (Beta-chimaerin)
P52757	CHN2 ARHGAP3 BCH	Beta-chimaerin (Beta-chimerin) (Rho GTPase-activating protein 3)
H7C0V3	CHN2	Beta-chimaerin (Fragment)
E5RJH0	BHMT	Betaine--homocysteine S-methyltransferase 1
Q93088	BHMT	Betaine--homocysteine S-methyltransferase 1 (EC 2.1.1.5)
P07814	EPRS GLNS PARS QARS QPRS PIG32	Bifunctional glutamate/proline--tRNA ligase (Bifunctional aminoacyl-tRNA synthetase) (Cell proliferation-inducing gene 32 protein) (Glutamatyl-prolyl-tRNA synthetase) [Includes: Glutamate--tRNA ligase (EC 6.1.1.17) (Glutamyl-tRNA synthetase) (GluRS); Proline--tRNA ligase (EC 6.1.1.15) (Prolyl-tRNA synthetase)]
P54132	BLM RECQ2 RECQL3	Bloom syndrome protein (EC 3.6.4.12) (DNA helicase, RecQ-like type 2) (RecQ2) (RecQ protein-like 3)
P13497	BMP1 PCOLC	Bone morphogenetic protein 1 (BMP-1) (EC 3.4.24.19) (Mammalian tolloid protein) (mTld) (Procollagen C-proteinase) (PCP)
Q9NRL2	BAZ1A ACF1 WCRF180 HSPC317	Bromodomain adjacent to zinc finger domain protein 1A (ATP-dependent chromatin-remodeling protein) (ATP-utilizing chromatin assembly and remodeling factor 1) (hACF1) (CHRAC subunit ACF1) (Williams syndrome transcription factor-related chromatin-remodeling factor 180) (WCRF180) (hWALp1)
J3KPG5	BAZ2A	Bromodomain adjacent to zinc finger domain protein 2A
F8VU39	BAZ2A	Bromodomain adjacent to zinc finger domain protein 2A
A0A0C4DGI9	BAZ2A	Bromodomain adjacent to zinc finger domain protein 2A (Fragment)
Q9UIF9	BAZ2A KIAA0314 TIP5	Bromodomain adjacent to zinc finger domain protein 2A (Transcription termination factor I-interacting protein 5) (TTF-I-interacting protein 5) (Tip5) (hWALp3)
Q9UIF8	BAZ2B KIAA1476	Bromodomain adjacent to zinc finger domain protein 2B (hWALp4)
Q9ULD4	BRPF3 KIAA1286	Bromodomain and PHD finger-containing protein 3
E9PI60	BRPF3	Bromodomain and PHD finger-containing protein 3
E9PSF3	BRPF3	Bromodomain and PHD finger-containing protein 3
O95696	BRD1 BRL BRPF2	Bromodomain-containing protein 1 (BR140-like protein) (Bromodomain and PHD finger-containing protein 2)
A8K7I4	CLCA1 CACC1	Calcium-activated chloride channel regulator 1 (EC 3.4.-.-) (Calcium-activated chloride channel family member 1) (hCLCA1) (Calcium-activated chloride channel protein 1) (CaCC-1) (hCaCC-1)
Q14CN2	CLCA4 CaCC2 UNQ562/PRO1124	Calcium-activated chloride channel regulator 4 (EC 3.4.-.-) (Calcium-activated chloride channel family member 4) (hCLCA4) (Calcium-activated chloride channel protein 2) (CaCC-2) (hCaCC-2) (Chloride channel accessory 4) [Cleaved into: Calcium-activated chloride channel regulator 4, 110 kDa form; Calcium-activated chloride channel regulator 4, 30 kDa form]
P15085	CPA1 CPA	Carboxypeptidase A1 (EC 3.4.17.1)
P48052	CPA2	Carboxypeptidase A2 (EC 3.4.17.15)
Q9UI42	CPA4 CPA3 UNQ694/PRO1339	Carboxypeptidase A4 (EC 3.4.17.-) (Carboxypeptidase A3)
Q8WXQ8	CPA5	Carboxypeptidase A5 (EC 3.4.17.-)
Q8N4T0	CPA6 CPAH	Carboxypeptidase A6 (EC 3.4.17.-)
P15086	CPB1 CPB PCPB	Carboxypeptidase B (EC 3.4.17.2) (Pancreas-specific protein) (PASP)
Q96IY4	CPB2	Carboxypeptidase B2 (EC 3.4.17.20) (Carboxypeptidase U) (CPU) (Plasma carboxypeptidase B) (pCPB) (Thrombin-activable fibrinolysis inhibitor) (TAFI)
O75976	CPD	Carboxypeptidase D (EC 3.4.17.22) (Metallocarboxypeptidase D) (gp180)
P16870	CPE	Carboxypeptidase E (CPE) (EC 3.4.17.10) (Carboxypeptidase H) (CPH) (Enkephalin convertase) (Prohormone-processing carboxypeptidase)
P14384	CPM	Carboxypeptidase M (CPM) (EC 3.4.17.12)
P15169	CPN1 ACBP	Carboxypeptidase N catalytic chain (CPN) (EC 3.4.17.3) (Anaphylatoxin inactivator) (Arginine carboxypeptidase) (Carboxypeptidase N polypeptide 1) (Carboxypeptidase N small subunit) (Kininase-1) (Lysine carboxypeptidase) (Plasma carboxypeptidase B) (Serum carboxypeptidase N) (SCPN)
Q8IVL8	CPO	Carboxypeptidase O (CPO) (EC 3.4.17.-)
Q66K79	CPZ	Carboxypeptidase Z (CPZ) (EC 3.4.17.-)
O95628	CNOT4 NOT4	CCR4-NOT transcription complex subunit 4 (EC 2.3.2.27) (CCR4-associated factor 4) (E3 ubiquitin-protein ligase CNOT4) (Potential transcriptional repressor NOT4Hp) (RING-type E3 ubiquitin transferase CNOT4)
B7Z493	FGD4	cDNA FLJ55905, highly similar to FYVE, RhoGEF and PH domain-containing protein 4
B4DEN4	ZFAND2B	cDNA FLJ60439, highly similar to AN1-type zinc finger protein 2B
P62633	CNBP RNF163 ZNF9	Cellular nucleic acid-binding protein (CNBP) (Zinc finger protein 9)
D6RAT4	CNBP	Cellular nucleic acid-binding protein (Fragment)
A0A0C4DFW9	TP73 hCG_19088	Cellular tumor antigen p53
A0A087WZU8	TP53	Cellular tumor antigen p53
A0A087X1Q1	TP53	Cellular tumor antigen p53
A0A087WXZ1	TP53	Cellular tumor antigen p53
A0A087WT22	TP53	Cellular tumor antigen p53
A0A0U1RQC9	TP53	Cellular tumor antigen p53
J3KP33	TP53	Cellular tumor antigen p53
E7EQX7	TP53	Cellular tumor antigen p53
P04637	TP53 P53	Cellular tumor antigen p53 (Antigen NY-CO-13) (Phosphoprotein p53) (Tumor suppressor p53)
E9PFT5	TP53	Cellular tumor antigen p53 (Fragment)
E7ESS1	TP53	Cellular tumor antigen p53 (Fragment)
E7EMR6	TP53	Cellular tumor antigen p53 (Fragment)
Q12873	CHD3	Chromodomain-helicase-DNA-binding protein 3 (CHD-3) (EC 3.6.4.12) (ATP-dependent helicase CHD3) (Mi-2 autoantigen 240 kDa protein) (Mi2-alpha) (Zinc finger helicase) (hZFH)
F5GWX5	CHD4	Chromodomain-helicase-DNA-binding protein 4
A0A0C4DGG9	CHD4	Chromodomain-helicase-DNA-binding protein 4
Q14839	CHD4	Chromodomain-helicase-DNA-binding protein 4 (CHD-4) (EC 3.6.4.12) (ATP-dependent helicase CHD4) (Mi-2 autoantigen 218 kDa protein) (Mi2-beta)
F2Z2R5	CHD5	Chromodomain-helicase-DNA-binding protein 5
Q8TDI0	CHD5 KIAA0444	Chromodomain-helicase-DNA-binding protein 5 (CHD-5) (EC 3.6.4.12) (ATP-dependent helicase CHD5)
O14578	CIT CRIK KIAA0949 STK21	Citron Rho-interacting kinase (CRIK) (EC 2.7.11.1) (Serine/threonine-protein kinase 21)
Q9UKF6	CPSF3 CPSF73	Cleavage and polyadenylation specificity factor subunit 3 (EC 3.1.27.-) (Cleavage and polyadenylation specificity factor 73 kDa subunit) (CPSF 73 kDa subunit) (mRNA 3'-end-processing endonuclease CPSF-73)
O95639	CPSF4 CPSF30 NAR NEB1	Cleavage and polyadenylation specificity factor subunit 4 (Cleavage and polyadenylation specificity factor 30 kDa subunit) (CPSF 30 kDa subunit) (NS1 effector domain-binding protein 1) (Neb-1) (No arches homolog)
C9JEV9	CPSF4	Cleavage and polyadenylation-specificity factor subunit 4
B7Z7B0	CPSF4	Cleavage and polyadenylation-specificity factor subunit 4 (cDNA FLJ52791, highly similar to Cleavage and polyadenylation specificityfactor 30 kDa subunit)
P20849	COL9A1	Collagen alpha-1(IX) chain
P39060	COL18A1	Collagen alpha-1(XVIII) chain [Cleaved into: Endostatin; Non-collagenous domain 1 (NC1)]
O14618	CCS	Copper chaperone for superoxide dismutase (Superoxide dismutase copper chaperone)
Q92793	CREBBP CBP	CREB-binding protein (EC 2.3.1.48)
P10606	COX5B	Cytochrome c oxidase subunit 5B, mitochondrial (Cytochrome c oxidase polypeptide Vb)
P51813	BMX	Cytoplasmic tyrosine-protein kinase BMX (EC 2.7.10.2) (Bone marrow tyrosine kinase gene in chromosome X protein) (Epithelial and endothelial tyrosine kinase) (ETK) (NTK38)
Q9UPW5	AGTPBP1 CCP1 KIAA1035 NNA1	Cytosolic carboxypeptidase 1 (EC 3.4.17.-) (ATP/GTP-binding protein 1) (Nervous system nuclear protein induced by axotomy protein 1 homolog)
Q5U5Z8	AGBL2 CCP2	Cytosolic carboxypeptidase 2 (EC 3.4.17.-) (ATP/GTP-binding protein-like 2)
Q8NEM8	AGBL3 CCP3	Cytosolic carboxypeptidase 3 (EC 3.4.17.-) (ATP/GTP-binding protein-like 3)
Q96MI9	AGBL1 CCP4	Cytosolic carboxypeptidase 4 (EC 3.4.17.-) (ATP/GTP-binding protein-like 1)
Q5VU57	AGBL4 CCP6	Cytosolic carboxypeptidase 6 (EC 3.4.17.-) (ATP/GTP-binding protein-like 4)
Q8NDL9	AGBL5 CCP5	Cytosolic carboxypeptidase-like protein 5 (EC 3.4.17.-) (ATP/GTP-binding protein-like 5)
Q9Y3Z3	SAMHD1 MOP5	Deoxynucleoside triphosphate triphosphohydrolase SAMHD1 (dNTPase) (EC 3.1.5.-) (Dendritic cell-derived IFNG-induced protein) (DCIP) (Monocyte protein 5) (MOP-5) (SAM domain and HD domain-containing protein 1) (hSAMHD1)
H0YA20	DGKQ	Diacylglycerol kinase (DAG kinase) (EC 2.7.1.107) (Fragment)
P23743	DGKA DAGK DAGK1	Diacylglycerol kinase alpha (DAG kinase alpha) (EC 2.7.1.107) (80 kDa diacylglycerol kinase) (Diglyceride kinase alpha) (DGK-alpha)
Q9Y6T7	DGKB DAGK2 KIAA0718	Diacylglycerol kinase beta (DAG kinase beta) (EC 2.7.1.107) (90 kDa diacylglycerol kinase) (Diglyceride kinase beta) (DGK-beta)
Q16760	DGKD KIAA0145	Diacylglycerol kinase delta (DAG kinase delta) (EC 2.7.1.107) (130 kDa diacylglycerol kinase) (Diglyceride kinase delta) (DGK-delta)
P52429	DGKE DAGK5	Diacylglycerol kinase epsilon (DAG kinase epsilon) (EC 2.7.1.107) (Diglyceride kinase epsilon) (DGK-epsilon)
Q86XP1	DGKH	Diacylglycerol kinase eta (DAG kinase eta) (EC 2.7.1.107) (Diglyceride kinase eta) (DGK-eta)
P49619	DGKG DAGK3	Diacylglycerol kinase gamma (DAG kinase gamma) (EC 2.7.1.107) (Diglyceride kinase gamma) (DGK-gamma)
H7C0L0	DGKG	Diacylglycerol kinase gamma (Fragment)
O75912	DGKI	Diacylglycerol kinase iota (DAG kinase iota) (EC 2.7.1.107) (Diglyceride kinase iota) (DGK-iota)
Q5KSL6	DGKK	Diacylglycerol kinase kappa (DAG kinase kappa) (EC 2.7.1.107) (142 kDa diacylglycerol kinase) (Diglyceride kinase kappa) (DGK-kappa)
P52824	DGKQ DAGK4	Diacylglycerol kinase theta (DAG kinase theta) (EC 2.7.1.107) (Diglyceride kinase theta) (DGK-theta)
Q13574	DGKZ DAGK6	Diacylglycerol kinase zeta (DAG kinase zeta) (EC 2.7.1.107) (Diglyceride kinase zeta) (DGK-zeta)
Q6ZN54	DEF8	Differentially expressed in FDCP 8 homolog (DEF-8)
J3QLL2	DPEP2	Dipeptidase (EC 3.4.13.19) (Fragment)
J3KSU4	DPEP2	Dipeptidase (EC 3.4.13.19) (Fragment)
H3BP43	DPEP1	Dipeptidase (EC 3.4.13.19) (Fragment)
I3L348	DPEP2	Dipeptidase (EC 3.4.13.19) (Fragment)
H3BQS5	DPEP1	Dipeptidase (EC 3.4.13.19) (Fragment)
P16444	DPEP1 MDP RDP	Dipeptidase 1 (EC 3.4.13.19) (Dehydropeptidase-I) (Microsomal dipeptidase) (Renal dipeptidase) (hRDP)
Q9H4A9	DPEP2 UNQ284/PRO323	Dipeptidase 2 (EC 3.4.13.19)
Q9H4B8	DPEP3 UNQ834/PRO1772	Dipeptidase 3 (EC 3.4.13.19)
O14672	ADAM10 KUZ MADM	Disintegrin and metalloproteinase domain-containing protein 10 (ADAM 10) (EC 3.4.24.81) (CDw156) (Kuzbanian protein homolog) (Mammalian disintegrin-metalloprotease) (CD antigen CD156c)
O43184	ADAM12 MLTN UNQ346/PRO545	Disintegrin and metalloproteinase domain-containing protein 12 (ADAM 12) (EC 3.4.24.-) (Meltrin-alpha)
Q13444	ADAM15 MDC15	Disintegrin and metalloproteinase domain-containing protein 15 (ADAM 15) (EC 3.4.24.-) (Metalloprotease RGD disintegrin protein) (Metalloproteinase-like, disintegrin-like, and cysteine-rich protein 15) (MDC-15) (Metargidin)
P78536	ADAM17 CSVP TACE	Disintegrin and metalloproteinase domain-containing protein 17 (ADAM 17) (EC 3.4.24.86) (Snake venom-like protease) (TNF-alpha convertase) (TNF-alpha-converting enzyme) (CD antigen CD156b)
Q9H013	ADAM19 MLTNB FKSG34	Disintegrin and metalloproteinase domain-containing protein 19 (ADAM 19) (EC 3.4.24.-) (Meltrin-beta) (Metalloprotease and disintegrin dendritic antigen marker) (MADDAM)
O43506	ADAM20	Disintegrin and metalloproteinase domain-containing protein 20 (ADAM 20) (EC 3.4.24.-)
Q9UKJ8	ADAM21	Disintegrin and metalloproteinase domain-containing protein 21 (ADAM 21) (EC 3.4.24.-)
Q9UKQ2	ADAM28 ADAM23 MDCL	Disintegrin and metalloproteinase domain-containing protein 28 (ADAM 28) (EC 3.4.24.-) (Epididymal metalloproteinase-like, disintegrin-like, and cysteine-rich protein II) (eMDC II) (Metalloproteinase-like, disintegrin-like, and cysteine-rich protein L) (MDC-L)
Q9UKF2	ADAM30 UNQ2509/PRO5997	Disintegrin and metalloproteinase domain-containing protein 30 (ADAM 30) (EC 3.4.24.-)
Q9BZ11	ADAM33 C20orf153 UNQ873/PRO1891	Disintegrin and metalloproteinase domain-containing protein 33 (ADAM 33) (EC 3.4.24.-)
P78325	ADAM8 MS2	Disintegrin and metalloproteinase domain-containing protein 8 (ADAM 8) (EC 3.4.24.-) (Cell surface antigen MS2) (CD antigen CD156a)
Q13443	ADAM9 KIAA0021 MCMP MDC9 MLTNG	Disintegrin and metalloproteinase domain-containing protein 9 (ADAM 9) (EC 3.4.24.-) (Cellular disintegrin-related protein) (Meltrin-gamma) (Metalloprotease/disintegrin/cysteine-rich protein 9) (Myeloma cell metalloproteinase)
Q5FWF4	ZRANB3	DNA annealing helicase and endonuclease ZRANB3 (Annealing helicase 2) (AH2) (Zinc finger Ran-binding domain-containing protein 3) [Includes: DNA annealing helicase ZRANB3 (EC 3.6.4.-); Endonuclease ZRANB3 (EC 3.1.-.-)]
P49642	PRIM1	DNA primase small subunit (EC 2.7.7.-) (DNA primase 49 kDa subunit) (p49)
P38935	IGHMBP2 SMBP2 SMUBP2	DNA-binding protein SMUBP-2 (EC 3.6.4.12) (EC 3.6.4.13) (ATP-dependent helicase IGHMBP2) (Glial factor 1) (GF-1) (Immunoglobulin mu-binding protein 2)
A0A0A0MT77	DNAJC24	DnaJ homolog subfamily C member 24
Q6P3W2	DNAJC24 DPH4 ZCSL3	DnaJ homolog subfamily C member 24 (CSL-type zinc finger-containing protein 3) (Diphthamide biosynthesis protein 4)
P55265	ADAR ADAR1 DSRAD G1P1 IFI4	Double-stranded RNA-specific adenosine deaminase (DRADA) (EC 3.5.4.37) (136 kDa double-stranded RNA-binding protein) (p136) (Interferon-inducible protein 4) (IFI-4) (K88DSRBP)
P78563	ADARB1 ADAR2 DRADA2 RED1	Double-stranded RNA-specific editase 1 (EC 3.5.4.37) (RNA-editing deaminase 1) (RNA-editing enzyme 1) (dsRNA adenosine deaminase)
Q9NS39	ADARB2 ADAR3 RED2	Double-stranded RNA-specific editase B2 (EC 3.5.-.-) (RNA-dependent adenosine deaminase 3) (RNA-editing deaminase 2) (RNA-editing enzyme 2) (dsRNA adenosine deaminase B2)
Q96FX2	DPH3 DESR1 ZCSL2	DPH3 homolog (CSL-type zinc finger-containing protein 2) (DelGEF-interacting protein 1) (DelGIP1)
A0A075B6G3	DMD	Dystrophin
P11532	DMD	Dystrophin
E9PDN5	DMD	Dystrophin
A0A087WV90	DMD	Dystrophin
A0A087WTU7	DMD	Dystrophin
P49792	RANBP2 NUP358	E3 SUMO-protein ligase RanBP2 (EC 2.3.2.-) (358 kDa nucleoporin) (Nuclear pore complex protein Nup358) (Nucleoporin Nup358) (Ran-binding protein 2) (RanBP2) (p270)
Q8NHY2	COP1 RFWD2 RNF200	E3 ubiquitin-protein ligase COP1 (EC 2.3.2.27) (Constitutive photomorphogenesis protein 1 homolog) (hCOP1) (RING finger and WD repeat domain protein 2) (RING finger protein 200) (RING-type E3 ubiquitin transferase RFWD2)
H0Y339	COP1	E3 ubiquitin-protein ligase COP1 (Fragment)
Q8TBB1	LNX1 LNX PDZRN2 UNQ574/PRO1136	E3 ubiquitin-protein ligase LNX (EC 2.3.2.27) (Ligand of Numb-protein X 1) (Numb-binding protein 1) (PDZ domain-containing RING finger protein 2) (RING-type E3 ubiquitin transferase LNX)
Q6UWE0	LRSAM1 TAL UNQ6496/PRO21356	E3 ubiquitin-protein ligase LRSAM1 (EC 2.3.2.27) (Leucine-rich repeat and sterile alpha motif-containing protein 1) (RING-type E3 ubiquitin transferase LRSAM1) (Tsg101-associated ligase) (hTAL)
O15344	MID1 FXY RNF59 TRIM18 XPRF	E3 ubiquitin-protein ligase Midline-1 (EC 2.3.2.27) (Midin) (Putative transcription factor XPRF) (RING finger protein 59) (RING finger protein Midline-1) (RING-type E3 ubiquitin transferase Midline-1) (Tripartite motif-containing protein 18)
C9J453	MID1	E3 ubiquitin-protein ligase Midline-1 (Fragment)
O60260	PRKN PARK2	E3 ubiquitin-protein ligase parkin (Parkin) (EC 2.3.2.31) (Parkin RBR E3 ubiquitin-protein ligase) (Parkinson juvenile disease protein 2) (Parkinson disease protein 2)
Q9UPQ7	PDZRN3 KIAA1095 LNX3 SEMCAP3	E3 ubiquitin-protein ligase PDZRN3 (EC 2.3.2.27) (Ligand of Numb protein X 3) (PDZ domain-containing RING finger protein 3) (RING-type E3 ubiquitin transferase PDZRN3) (Semaphorin cytoplasmic domain-associated protein 3) (Protein SEMACAP3)
Q7Z6J0	SH3RF1 KIAA1494 POSH POSH1 RNF142 SH3MD2	E3 ubiquitin-protein ligase SH3RF1 (EC 2.3.2.27) (Plenty of SH3s) (Protein POSH) (RING finger protein 142) (RING-type E3 ubiquitin transferase SH3RF1) (SH3 domain-containing RING finger protein 1) (SH3 multiple domains protein 2)
Q8TEC5	SH3RF2 POSH3 POSHER PPP1R39 RNF158	E3 ubiquitin-protein ligase SH3RF2 (EC 2.3.2.27) (Heart protein phosphatase 1-binding protein) (HEPP1) (POSH-eliminating RING protein) (Protein phosphatase 1 regulatory subunit 39) (RING finger protein 158) (RING-type E3 ubiquitin transferase SH3RF2) (SH3 domain-containing RING finger protein 2)
Q8TEJ3	SH3RF3 POSH2 SH3MD4	E3 ubiquitin-protein ligase SH3RF3 (EC 2.3.2.27) (Plenty of SH3s 2) (SH3 domain-containing RING finger protein 3) (SH3 multiple domains protein 4)
Q149N8	SHPRH KIAA2023	E3 ubiquitin-protein ligase SHPRH (EC 2.3.2.27) (EC 3.6.4.-) (RING-type E3 ubiquitin transferase SHPRH) (SNF2, histone-linker, PHD and RING finger domain-containing helicase)
A0A0D9SFM0	SHPRH hCG_18061	E3 ubiquitin-protein ligase SHPRH (SNF2 histone linker PHD RING helicase, isoform CRA_a)
Q6Q0C0	TRAF7 RFWD1 RNF119	E3 ubiquitin-protein ligase TRAF7 (EC 2.3.2.27) (RING finger and WD repeat-containing protein 1) (RING finger protein 119) (RING-type E3 ubiquitin transferase TRAF7) (TNF receptor-associated factor 7)
P36406	TRIM23 ARD1 ARFD1 RNF46	E3 ubiquitin-protein ligase TRIM23 (EC 2.3.2.27) (ADP-ribosylation factor domain-containing protein 1) (GTP-binding protein ARD-1) (RING finger protein 46) (RING-type E3 ubiquitin transferase TRIM23) (Tripartite motif-containing protein 23)
Q13049	TRIM32 HT2A	E3 ubiquitin-protein ligase TRIM32 (EC 2.3.2.27) (72 kDa Tat-interacting protein) (RING-type E3 ubiquitin transferase TRIM32) (Tripartite motif-containing protein 32) (Zinc finger protein HT2A)
Q9UPN9	TRIM33 KIAA1113 RFG7 TIF1G	E3 ubiquitin-protein ligase TRIM33 (EC 2.3.2.27) (Ectodermin homolog) (RET-fused gene 7 protein) (Protein Rfg7) (RING-type E3 ubiquitin transferase TRIM33) (Transcription intermediary factor 1-gamma) (TIF1-gamma) (Tripartite motif-containing protein 33)
H0Y612	TRIM33	E3 ubiquitin-protein ligase TRIM33 (Fragment)
E9PBG3	TRIM36	E3 ubiquitin-protein ligase TRIM36
Q9NQ86	TRIM36 RBCC728 RNF98	E3 ubiquitin-protein ligase TRIM36 (EC 2.3.2.27) (RING finger protein 98) (RING-type E3 ubiquitin transferase TRIM36) (Tripartite motif-containing protein 36) (Zinc-binding protein Rbcc728)
Q2Q1W2	TRIM71 LIN41	E3 ubiquitin-protein ligase TRIM71 (EC 2.3.2.27) (Protein lin-41 homolog) (RING-type E3 ubiquitin transferase TRIM71) (Tripartite motif-containing protein 71)
Q9C026	TRIM9 KIAA0282 RNF91	E3 ubiquitin-protein ligase TRIM9 (EC 2.3.2.27) (RING finger protein 91) (RING-type E3 ubiquitin transferase TRIM9) (Tripartite motif-containing protein 9)
O95071	UBR5 EDD EDD1 HYD KIAA0896	E3 ubiquitin-protein ligase UBR5 (EC 2.3.2.26) (E3 ubiquitin-protein ligase, HECT domain-containing 1) (HECT-type E3 ubiquitin transferase UBR5) (Hyperplastic discs protein homolog) (hHYD) (Progestin-induced protein)
A0A087WTW0	UHRF1	E3 ubiquitin-protein ligase UHRF1
Q96T88	UHRF1 ICBP90 NP95 RNF106	E3 ubiquitin-protein ligase UHRF1 (EC 2.3.2.27) (Inverted CCAAT box-binding protein of 90 kDa) (Nuclear protein 95) (Nuclear zinc finger protein Np95) (HuNp95) (hNp95) (RING finger protein 106) (RING-type E3 ubiquitin transferase UHRF1) (Transcription factor ICBP90) (Ubiquitin-like PHD and RING finger domain-containing protein 1) (hUHRF1) (Ubiquitin-like-containing PHD and RING finger domains pro…
A0A087WVR3	UHRF1 hCG_23497	E3 ubiquitin-protein ligase UHRF1 (Ubiquitin-like, containing PHD and RING finger domains, 1, isoform CRA_b)
Q96PU4	UHRF2 NIRF RNF107	E3 ubiquitin-protein ligase UHRF2 (EC 2.3.2.27) (Np95/ICBP90-like RING finger protein) (Np95-like RING finger protein) (Nuclear protein 97) (Nuclear zinc finger protein Np97) (RING finger protein 107) (RING-type E3 ubiquitin transferase UHRF2) (Ubiquitin-like PHD and RING finger domain-containing protein 2) (Ubiquitin-like-containing PHD and RING finger domains protein 2)
Q9GZT9	EGLN1 C1orf12 PNAS-118 PNAS-137	Egl nine homolog 1 (EC 1.14.11.29) (Hypoxia-inducible factor prolyl hydroxylase 2) (HIF-PH2) (HIF-prolyl hydroxylase 2) (HPH-2) (Prolyl hydroxylase domain-containing protein 2) (PHD2) (SM-20)
P87889	ERVK-10	Endogenous retrovirus group K member 10 Gag polyprotein (HERV-K10 Gag protein) (HERV-K107 Gag protein) (HERV-K_5q33.3 provirus ancestral Gag polyprotein) (Gag polyprotein)
P10266	ERVK-10	Endogenous retrovirus group K member 10 Pol protein (HERV-K10 Pol protein) (HERV-K107 Pol protein) (HERV-K_5q33.3 provirus ancestral Pol protein) [Includes: Reverse transcriptase (RT) (EC 2.7.7.49); Ribonuclease H (RNase H) (EC 3.1.26.4); Integrase (IN)]
Q9UQG0	ERVK-11	Endogenous retrovirus group K member 11 Pol protein (HERV-K_3q27.2 provirus ancestral Pol protein) [Includes: Reverse transcriptase (RT) (EC 2.7.7.49); Ribonuclease H (RNase H) (EC 3.1.26.4); Integrase (IN)]
P62684	HERVK_113	Endogenous retrovirus group K member 113 Gag polyprotein (HERV-K113 Gag protein) (HERV-K_19p13.11 provirus ancestral Gag polyprotein) (Gag polyprotein)
P63132	HERVK_113	Endogenous retrovirus group K member 113 Pol protein (HERV-K113 Pol protein) (HERV-K_19p13.11 provirus ancestral Pol protein) [Includes: Reverse transcriptase (RT) (EC 2.7.7.49); Ribonuclease H (RNase H) (EC 3.1.26.4); Integrase (IN)]
Q9QC07	ERVK-18	Endogenous retrovirus group K member 18 Pol protein (HERV-K(C1a) Pol protein) (HERV-K110 Pol protein) (HERV-K18 Pol protein) (HERV-K_1q23.3 provirus ancestral Pol protein) [Includes: Reverse transcriptase (EC 2.7.7.49); Ribonuclease H (RNase H) (EC 3.1.26.4)]
Q9YNA8	ERVK-19	Endogenous retrovirus group K member 19 Gag polyprotein (HERV-K(C19) Gag protein) (HERV-K_19q11 provirus ancestral Gag polyprotein) (Gag polyprotein)
Q9WJR5	ERVK-19	Endogenous retrovirus group K member 19 Pol protein (HERV-K(C19) Pol protein) (HERV-K_19q11 provirus ancestral Pol protein) [Includes: Reverse transcriptase (RT) (EC 2.7.7.49); Ribonuclease H (RNase H) (EC 3.1.26.4); Integrase (IN)]
P62683	ERVK-21	Endogenous retrovirus group K member 21 Gag polyprotein (HERV-K_12q14.1 provirus ancestral Gag polyprotein) (Gag polyprotein)
P63145	ERVK-24	Endogenous retrovirus group K member 24 Gag polyprotein (HERV-K101 Gag protein) (HERV-K_22q11.21 provirus ancestral Gag polyprotein) (Gag polyprotein)
P63136	ERVK-25	Endogenous retrovirus group K member 25 Pol protein (HERV-K_11q22.1 provirus ancestral Pol protein) [Includes: Reverse transcriptase (RT) (EC 2.7.7.49); Ribonuclease H (RNase H) (EC 3.1.26.4); Integrase (IN)]
Q9HDB9	ERVK-5 ERVK5	Endogenous retrovirus group K member 5 Gag polyprotein (HERV-K(II) Gag protein) (HERV-K_3q12.3 provirus ancestral Gag polyprotein) (Gag polyprotein)
Q7LDI9	ERVK-6 ERVK6	Endogenous retrovirus group K member 6 Gag polyprotein (HERV-K(C7) Gag protein) (HERV-K(HML-2.HOM) Gag protein) (HERV-K108 Gag protein) (HERV-K_7p22.1 provirus ancestral Gag polyprotein) (Gag polyprotein)
Q9BXR3	ERVK-6 ERVK6	Endogenous retrovirus group K member 6 Pol protein (HERV-K(C7) Pol protein) (HERV-K(HML-2.HOM) Pol protein) (HERV-K108 Pol protein) (HERV-K_7p22.1 provirus ancestral Pol protein) [Includes: Reverse transcriptase (RT) (EC 2.7.7.49); Ribonuclease H (RNase H) (EC 3.1.26.4); Integrase (IN)]
P63130	ERVK-7	Endogenous retrovirus group K member 7 Gag polyprotein (HERV-K(III) Gag protein) (HERV-K102 Gag protein) (HERV-K_1q22 provirus ancestral Gag polyprotein) (Gag polyprotein)
P63135	ERVK-7	Endogenous retrovirus group K member 7 Pol protein (HERV-K(III) Pol protein) (HERV-K102 Pol protein) (HERV-K_1q22 provirus ancestral Pol protein) [Includes: Reverse transcriptase (RT) (EC 2.7.7.49); Ribonuclease H (RNase H) (EC 3.1.26.4); Integrase (IN)]
P62685	ERVK-8	Endogenous retrovirus group K member 8 Gag polyprotein (HERV-K115 Gag protein) (HERV-K_8p23.1 provirus ancestral Gag polyprotein) (Gag polyprotein)
P63133	ERVK-8	Endogenous retrovirus group K member 8 Pol protein (HERV-K115 Pol protein) (HERV-K_8p23.1 provirus ancestral Pol protein) [Includes: Reverse transcriptase (RT) (EC 2.7.7.49); Ribonuclease H (RNase H) (EC 3.1.26.4); Integrase (IN)]
P63126	ERVK-9	Endogenous retrovirus group K member 9 Gag polyprotein (HERV-K(C6) Gag protein) (HERV-K109 Gag protein) (HERV-K_6q14.1 provirus ancestral Gag polyprotein) (Gag polyprotein)
P63128	ERVK-9	Endogenous retrovirus group K member 9 Pol protein (HERV-K(C6) Gag-Pol protein) (HERV-K109 Gag-Pol protein) (HERV-K_6q14.1 provirus ancestral Gag-Pol polyprotein) [Includes: Protease (EC 3.4.23.50) (PR) (Retropepsin); Reverse transcriptase/ribonuclease H (EC 2.7.7.49) (EC 2.7.7.7) (EC 3.1.26.4) (p66 RT)]
Q53H82	LACTB2 CGI-83	Endoribonuclease LACTB2 (EC 3.1.27.-) (Beta-lactamase-like protein 2)
C9JGE3	EWSR1	EWS RNA-binding protein variant 6 (RNA-binding protein EWS)
P08294	SOD3	Extracellular superoxide dismutase [Cu-Zn] (EC-SOD) (EC 1.15.1.1)
Q86XK2	FBXO11 FBX11 PRMT9 VIT1 UG063H01	F-box only protein 11 (Protein arginine N-methyltransferase 9) (Vitiligo-associated protein 1) (VIT-1)
B7ZM68	FGD5	FGD5 protein (FYVE, RhoGEF and PH domain-containing protein 5)
P98174	FGD1 FGDY ZFYVE3	FYVE, RhoGEF and PH domain-containing protein 1 (Faciogenital dysplasia 1 protein) (Rho/Rac guanine nucleotide exchange factor FGD1) (Rho/Rac GEF) (Zinc finger FYVE domain-containing protein 3)
Q7Z6J4	FGD2 ZFYVE4	FYVE, RhoGEF and PH domain-containing protein 2 (Zinc finger FYVE domain-containing protein 4)
Q5JSP0	FGD3 ZFYVE5	FYVE, RhoGEF and PH domain-containing protein 3 (Zinc finger FYVE domain-containing protein 5)
E9PJX4	FGD4	FYVE, RhoGEF and PH domain-containing protein 4
F8VWL3	FGD4	FYVE, RhoGEF and PH domain-containing protein 4
F8W1R0	FGD4	FYVE, RhoGEF and PH domain-containing protein 4
Q96M96	FGD4 FRABP ZFYVE6	FYVE, RhoGEF and PH domain-containing protein 4 (Actin filament-binding protein frabin) (FGD1-related F-actin-binding protein) (Zinc finger FYVE domain-containing protein 6)
Q6ZNL6	FGD5 ZFYVE23	FYVE, RhoGEF and PH domain-containing protein 5 (Zinc finger FYVE domain-containing protein 23)
F8VQX5	FGD6	FYVE, RhoGEF and PH domain-containing protein 6 (Fragment)
Q6ZV73	FGD6 KIAA1362 ZFYVE24	FYVE, RhoGEF and PH domain-containing protein 6 (Zinc finger FYVE domain-containing protein 24)
P23415	GLRA1	Glycine receptor subunit alpha-1 (Glycine receptor 48 kDa subunit) (Glycine receptor strychnine-binding subunit)
P23416	GLRA2	Glycine receptor subunit alpha-2
P52735	VAV2	Guanine nucleotide exchange factor VAV2 (VAV-2)
Q9UKW4	VAV3	Guanine nucleotide exchange factor VAV3 (VAV-3)
Q14527	HLTF HIP116A RNF80 SMARCA3 SNF2L3 ZBU1	Helicase-like transcription factor (EC 2.3.2.27) (EC 3.6.4.-) (DNA-binding protein/plasminogen activator inhibitor 1 regulator) (HIP116) (RING finger protein 80) (RING-type E3 ubiquitin transferase HLTF) (SWI/SNF-related matrix-associated actin-dependent regulator of chromatin subfamily A member 3) (Sucrose nonfermenting protein 2-like 3)
H7C5K0	HLTF	Helicase-like transcription factor (Fragment)
A0A0C4DGA6	HLTF SMARCA3 hCG_21212	Helicase-like transcription factor (SWI/SNF related, matrix associated, actin dependent regulator of chromatin, subfamily a, member 3, isoform CRA_c)
P04196	HRG	Histidine-rich glycoprotein (Histidine-proline-rich glycoprotein) (HPRG)
Q09472	EP300 P300	Histone acetyltransferase p300 (p300 HAT) (EC 2.3.1.48) (E1A-associated protein p300) (Histone butyryltransferase p300) (EC 2.3.1.-) (Histone crotonyltransferase p300) (EC 2.3.1.-) (Protein propionyltransferase p300) (EC 2.3.1.-)
Q9NR48	ASH1L KIAA1420 KMT2H	Histone-lysine N-methyltransferase ASH1L (EC 2.1.1.43) (ASH1-like protein) (huASH1) (Absent small and homeotic disks protein 1 homolog) (Lysine N-methyltransferase 2H)
O96028	NSD2 KIAA1090 MMSET TRX5 WHSC1	Histone-lysine N-methyltransferase NSD2 (EC 2.1.1.43) (Multiple myeloma SET domain-containing protein) (MMSET) (Nuclear SET domain-containing protein 2) (Protein trithorax-5) (Wolf-Hirschhorn syndrome candidate 1 protein)
E9PMV2	HLA-DQA1	HLA class II histocompatibility antigen, DQ alpha 1 chain (Fragment)
Q16775	HAGH GLO2 HAGH1	Hydroxyacylglutathione hydrolase, mitochondrial (EC 3.1.2.6) (Glyoxalase II) (Glx II)
Q6PII5	HAGHL	Hydroxyacylglutathione hydrolase-like protein (EC 3.1.2.-)
D6RBJ1	ISL1	Insulin gene enhancer protein ISL-1
P61371	ISL1	Insulin gene enhancer protein ISL-1 (Islet-1)
Q96A47	ISL2	Insulin gene enhancer protein ISL-2 (Islet-2)
Q9BYX4	IFIH1 MDA5 RH116	Interferon-induced helicase C domain-containing protein 1 (EC 3.6.4.13) (Clinically amyopathic dermatomyositis autoantigen 140 kDa) (CADM-140 autoantigen) (Helicase with 2 CARD domains) (Helicard) (Interferon-induced with helicase C domain protein 1) (Melanoma differentiation-associated protein 5) (MDA-5) (Murabutide down-regulated protein) (RIG-I-like receptor 2) (RLR-2) (RNA helicase-DEAD box p…
Q9Y5K2	KLK4 EMSP1 PRSS17 PSTS	Kallikrein-4 (EC 3.4.21.-) (Enamel matrix serine proteinase 1) (Kallikrein-like protein 1) (KLK-L1) (Prostase) (Serine protease 17)
A0A0A0MQW1	KSR1	Kinase suppressor of Ras 1
Q8IVT5	KSR1 KSR	Kinase suppressor of Ras 1
E9PB13	KSR2	Kinase suppressor of Ras 2
Q6VAB6	KSR2	Kinase suppressor of Ras 2 (hKSR2) (EC 2.7.11.1)
Q04760	GLO1	Lactoylglutathione lyase (EC 4.4.1.5) (Aldoketomutase) (Glyoxalase I) (Glx I) (Ketone-aldehyde mutase) (Methylglyoxalase) (S-D-lactoylglutathione methylglyoxal lyase)
Q96B70	LENG9	Leukocyte receptor cluster member 9
A0A087WVD1	LENG9	Leukocyte receptor cluster member 9
Q8N448	LNX2 PDZRN1	Ligand of Numb protein X 2 (Numb-binding protein 2) (PDZ domain-containing RING finger protein 1)
Q9UPQ0	LIMCH1 KIAA1102	LIM and calponin homology domains-containing protein 1
D6RD46	LIMCH1	LIM and calponin homology domains-containing protein 1
E9PC47	LIMK1	LIM domain kinase 1
P53667	LIMK1 LIMK	LIM domain kinase 1 (LIMK-1) (EC 2.7.11.1)
B5MC51	LIMK2	LIM domain kinase 2
P53671	LIMK2	LIM domain kinase 2 (LIMK-2) (EC 2.7.11.1)
J3KP06	LMO7	LIM domain only protein 7
F8WD26	LMO7	LIM domain only protein 7
E9PMS6	LMO7	LIM domain only protein 7
E9PMT2	LMO7	LIM domain only protein 7
Q8WWI1	LMO7 FBX20 FBXO20 KIAA0858	LIM domain only protein 7 (LMO-7) (F-box only protein 20) (LOMP)
O75112	LDB3 KIAA0613 ZASP	LIM domain-binding protein 3 (Protein cypher) (Z-band alternatively spliced PDZ-motif protein)
Q8TE12	LMX1A	LIM homeobox transcription factor 1-alpha (LIM/homeobox protein 1.1) (LMX-1.1) (LIM/homeobox protein LMX1A)
O60663	LMX1B	LIM homeobox transcription factor 1-beta (LIM/homeobox protein 1.2) (LMX-1.2) (LIM/homeobox protein LMX1B)
B7ZLH2	LMX1B	LIM homeobox transcription factor 1-beta (LMX1B protein)
P48742	LHX1 LIM-1 LIM1	LIM/homeobox protein Lhx1 (LIM homeobox protein 1) (Homeobox protein Lim-1) (hLim-1)
H7C0H1	LHX2	LIM/homeobox protein Lhx2 (Fragment)
P50458	LHX2 LH2	LIM/homeobox protein Lhx2 (Homeobox protein LH-2) (LIM homeobox protein 2)
F1T0D7	LHX3	LIM/homeobox protein Lhx3
Q9UBR4	LHX3	LIM/homeobox protein Lhx3 (LIM homeobox protein 3)
Q969G2	LHX4	LIM/homeobox protein Lhx4 (LIM homeobox protein 4)
Q9H2C1	LHX5	LIM/homeobox protein Lhx5 (LIM homeobox protein 5)
Q9UPM6	LHX6 LHX6.1	LIM/homeobox protein Lhx6 (LIM homeobox protein 6) (LIM/homeobox protein Lhx6.1)
Q68G74	LHX8	LIM/homeobox protein Lhx8 (LIM homeobox protein 8)
H0YL54	LHX9	LIM/homeobox protein Lhx9
Q9NQ69	LHX9	LIM/homeobox protein Lhx9 (LIM homeobox protein 9)
P04156	PRNP ALTPRP PRIP PRP	Major prion protein (PrP) (ASCR) (PrP27-30) (PrP33-35C) (CD antigen CD230)
Q9HBH9	MKNK2 GPRK7 MNK2	MAP kinase-interacting serine/threonine-protein kinase 2 (EC 2.7.11.1) (MAP kinase signal-integrating kinase 2) (MAPK signal-integrating kinase 2) (Mnk2)
P15088	CPA3	Mast cell carboxypeptidase A (MC-CPA) (EC 3.4.17.1) (Carboxypeptidase A3)
J3QKX5	MEP1B hCG_25081	Meprin A subunit (EC 3.4.24.-) (Endopeptidase-2)
B7ZL91	MEP1A	Meprin A subunit (EC 3.4.24.-) (Endopeptidase-2)
Q16819	MEP1A	Meprin A subunit alpha (EC 3.4.24.18) (Endopeptidase-2) (N-benzoyl-L-tyrosyl-P-amino-benzoic acid hydrolase subunit alpha) (PABA peptide hydrolase) (PPH alpha)
Q16820	MEP1B	Meprin A subunit beta (EC 3.4.24.63) (Endopeptidase-2) (Meprin B) (N-benzoyl-L-tyrosyl-P-amino-benzoic acid hydrolase subunit beta) (PABA peptide hydrolase) (PPH beta)
A4D2B0	MBLAC1	Metallo-beta-lactamase domain-containing protein 1 (EC 3.-.-.-)
Q68D91	MBLAC2	Metallo-beta-lactamase domain-containing protein 2 (EC 3.-.-.-)
E9PD25	TLL1	Metalloendopeptidase (EC 3.4.24.-)
Q3MIM8	BMP1	Metalloendopeptidase (EC 3.4.24.-)
P04731	MT1A MT1S	Metallothionein-1A (MT-1A) (Metallothionein-IA) (MT-IA)
P07438	MT1B MT1Q	Metallothionein-1B (MT-1B) (Metallothionein-IB) (MT-IB)
P04732	MT1E	Metallothionein-1E (MT-1E) (Metallothionein-IE) (MT-IE)
P04733	MT1F PRO0376	Metallothionein-1F (MT-1F) (Metallothionein-IF) (MT-IF)
P13640	MT1G MT1K MT1M	Metallothionein-1G (MT-1G) (Metallothionein-1K) (MT-1K) (Metallothionein-IG) (MT-IG)
P80294	MT1H	Metallothionein-1H (MT-1H) (Metallothionein-0) (MT-0) (Metallothionein-IH) (MT-IH)
Q93083	MT1L	Metallothionein-1L (MT-1L) (Metallothionein-IL) (MT-IL)
Q8N339	MT1M MT1K	Metallothionein-1M (MT-1M) (Metallothionein-IM) (MT-IM)
P80297	MT1X	Metallothionein-1X (MT-1X) (Metallothionein-IX) (MT-IX)
P02795	MT2A CES1 MT2	Metallothionein-2 (MT-2) (Metallothionein-2A) (Metallothionein-II) (MT-II)
P25713	MT3	Metallothionein-3 (MT-3) (GIFB) (GIF) (Growth inhibitory factor) (Metallothionein-III) (MT-III)
P47944	MT4	Metallothionein-4 (MT-4) (Metallothionein-IV) (MT-IV)
Q99707	MTR	Methionine synthase (EC 2.1.1.13) (5-methyltetrahydrofolate--homocysteine methyltransferase) (Vitamin-B12 dependent methionine synthase) (MS)
Q8N3F8	MICALL1 KIAA1668 MIRAB13	MICAL-like protein 1 (Molecule interacting with Rab13) (MIRab13)
Q8IY33	MICALL2 JRAB	MICAL-like protein 2 (Junctional Rab13-binding protein) (Molecule interacting with CasL-like 2) (MICAL-L2)
Q13233	MAP3K1 MAPKKK1 MEKK MEKK1	Mitogen-activated protein kinase kinase kinase 1 (EC 2.7.11.25) (MAPK/ERK kinase kinase 1) (MEK kinase 1) (MEKK 1)
Q14896	MYBPC3	Myosin-binding protein C, cardiac-type (Cardiac MyBP-C) (C-protein, cardiac muscle isoform)
B8ZZ96	CHN1	N-chimaerin
P15882	CHN1 ARHGAP2 CHN	N-chimaerin (A-chimaerin) (Alpha-chimerin) (N-chimerin) (NC) (Rho GTPase-activating protein 2)
C9J1N1	CHN1	N-chimaerin (Fragment)
C9J3V9	CHN1	N-chimaerin (Fragment)
C9JR98	CHN1	N-chimaerin (Fragment)
P29474	NOS3	Nitric oxide synthase, endothelial (EC 1.14.13.39) (Constitutive NOS) (cNOS) (EC-NOS) (Endothelial NOS) (eNOS) (NOS type III) (NOSIII)
P35228	NOS2 NOS2A	Nitric oxide synthase, inducible (EC 1.14.13.39) (Hepatocyte NOS) (HEP-NOS) (Inducible NO synthase) (Inducible NOS) (iNOS) (NOS type II) (Peptidyl-cysteine S-nitrosylase NOS2)
A0A0A0MRJ0	CDC42BPA	Non-specific serine/threonine protein kinase (EC 2.7.11.1)
H0Y4R8	SP100	Nuclear autoantigen Sp-100 (Fragment)
Q13342	SP140 LYSP100	Nuclear body protein SP140 (Lymphoid-restricted homolog of Sp100) (LYSp100) (Nuclear autoantigen Sp-140) (Speckled 140 kDa)
Q9H930	SP140L	Nuclear body protein SP140-like protein
U5Y3L1	SP140L	Nuclear body protein SP140-like protein (SP140L-1 protein)
H7BYP4	SP140L	Nuclear body protein SP140-like protein (SP140L-2 protein)
E9PE19	BPTF	Nucleosome-remodeling factor subunit BPTF
Q12830	BPTF FAC1 FALZ	Nucleosome-remodeling factor subunit BPTF (Bromodomain and PHD finger-containing transcription factor) (Fetal Alz-50 clone 1 protein) (Fetal Alzheimer antigen)
E7ETD6	BPTF	Nucleosome-remodeling factor subunit BPTF (Fragment)
J3QQQ8	BPTF	Nucleosome-remodeling factor subunit BPTF (Fragment)
Q13219	PAPPA	Pappalysin-1 (EC 3.4.24.79) (Insulin-like growth factor-dependent IGF-binding protein 4 protease) (IGF-dependent IGFBP-4 protease) (IGFBP-4ase) (Pregnancy-associated plasma protein A) (PAPP-A)
Q9BXP8	PAPPA2 PLAC3	Pappalysin-2 (EC 3.4.24.-) (Pregnancy-associated plasma protein A2) (PAPP-A2) (Pregnancy-associated plasma protein E1) (PAPP-E)
Q9UQ90	SPG7 CAR CMAR PGN	Paraplegin (EC 3.4.24.-) (Cell matrix adhesion regulator) (Spastic paraplegia 7 protein)
O00151	PDLIM1 CLIM1 CLP36	PDZ and LIM domain protein 1 (C-terminal LIM domain protein 1) (Elfin) (LIM domain protein CLP-36)
A0A087WVI1	PDLIM2	PDZ and LIM domain protein 2
Q96JY6	PDLIM2 PP6345	PDZ and LIM domain protein 2 (PDZ-LIM protein mystique)
A0A087WYF8	PDLIM3	PDZ and LIM domain protein 3
Q53GG5	PDLIM3 ALP	PDZ and LIM domain protein 3 (Actinin-associated LIM protein) (Alpha-actinin-2-associated LIM protein)
P50479	PDLIM4 RIL	PDZ and LIM domain protein 4 (LIM protein RIL) (Reversion-induced LIM protein)
Q96HC4	PDLIM5 ENH L9	PDZ and LIM domain protein 5 (Enigma homolog) (Enigma-like PDZ and LIM domains protein)
Q9NR12	PDLIM7 ENIGMA	PDZ and LIM domain protein 7 (LIM mineralization protein) (LMP) (Protein enigma)
Q8NEN9	PDZD8 PDZK8	PDZ domain-containing protein 8 (Sarcoma antigen NY-SAR-84/NY-SAR-104)
Q6ZMN7	PDZRN4 LNX4 SEMCAP3L	PDZ domain-containing RING finger protein 4 (Ligand of Numb protein X 4) (SEMACAP3-like protein)
P19021	PAM	Peptidyl-glycine alpha-amidating monooxygenase (PAM) [Includes: Peptidylglycine alpha-hydroxylating monooxygenase (PHM) (EC 1.14.17.3); Peptidyl-alpha-hydroxyglycine alpha-amidating lyase (EC 4.3.2.5) (Peptidylamidoglycolate lyase) (PAL)]
P55201	BRPF1 BR140	Peregrin (Bromodomain and PHD finger-containing protein 1) (Protein Br140)
Q96S99	PLEKHF1 APPD LAPF ZFYVE15	Pleckstrin homology domain-containing family F member 1 (PH domain-containing family F member 1) (Lysosome-associated apoptosis-inducing protein containing PH and FYVE domains) (Apoptosis-inducing protein) (PH and FYVE domain-containing protein 1) (Phafin-1) (Zinc finger FYVE domain-containing protein 15)
Q9H8W4	PLEKHF2 ZFYVE18	Pleckstrin homology domain-containing family F member 2 (PH domain-containing family F member 2) (Endoplasmic reticulum-associated apoptosis-involved protein containing PH and FYVE domains) (EAPF) (PH and FYVE domain-containing protein 2) (Phafin-2) (Phafin2) (Zinc finger FYVE domain-containing protein 18)
Q6ZWE6	PLEKHM3 DAPR PLEKHM1L	Pleckstrin homology domain-containing family M member 3 (PH domain-containing family M member 3) (Differentiation associated protein)
Q9NSA2	KCND1	Potassium voltage-gated channel subfamily D member 1 (Voltage-gated potassium channel subunit Kv4.1)
Q9NZV8	KCND2 KIAA1044	Potassium voltage-gated channel subfamily D member 2 (Voltage-gated potassium channel subunit Kv4.2)
Q9UK17	KCND3	Potassium voltage-gated channel subfamily D member 3 (Voltage-gated potassium channel subunit Kv4.3)
Q9NW64	RBM22 ZC3H16 199G4	Pre-mRNA-splicing factor RBM22 (RNA-binding motif protein 22) (Zinc finger CCCH domain-containing protein 16)
Q9NRD5	PICK1 PRKCABP	PRKCA-binding protein (Protein interacting with C kinase 1) (Protein kinase C-alpha-binding protein)
Q9UJV9	DDX41 ABS	Probable ATP-dependent RNA helicase DDX41 (EC 3.6.4.13) (DEAD box protein 41) (DEAD box protein abstrakt homolog)
A2A376	DDX58	Probable ATP-dependent RNA helicase DDX58
O95786	DDX58	Probable ATP-dependent RNA helicase DDX58 (EC 3.6.4.13) (DEAD box protein 58) (RIG-I-like receptor 1) (RLR-1) (Retinoic acid-inducible gene 1 protein) (RIG-1) (Retinoic acid-inducible gene I protein) (RIG-I)
Q5T1V6	DDX59 ZNHIT5	Probable ATP-dependent RNA helicase DDX59 (EC 3.6.4.13) (DEAD box protein 59) (Zinc finger HIT domain-containing protein 5)
Q96C10	DHX58 D11LGP2E LGP2	Probable ATP-dependent RNA helicase DHX58 (EC 3.6.4.13) (Probable ATP-dependent helicase LGP2) (Protein D11Lgp2 homolog) (RIG-I-like receptor 3) (RLR-3) (RIG-I-like receptor LGP2) (RLR)
Q96SM3	CPXM1 CPX1 CPXM UNQ3015/PRO9782	Probable carboxypeptidase X1 (EC 3.4.17.-) (Metallocarboxypeptidase CPX-1)
Q8N490	PNKD KIAA1184 MR1 TAHCCP2 FKSG19 UNQ2491/PRO5778	Probable hydrolase PNKD (EC 3.-.-.-) (Myofibrillogenesis regulator 1) (MR-1) (Paroxysmal nonkinesiogenic dyskinesia protein) (Trans-activated by hepatitis C virus core protein 2)
A0A087X0I9	PRKCQ	Protein kinase C (EC 2.7.11.13)
J3KRN5	PRKCA	Protein kinase C alpha type
J3KN97	PRKCA	Protein kinase C alpha type (Fragment)
P17252	PRKCA PKCA PRKACA	Protein kinase C alpha type (PKC-A) (PKC-alpha) (EC 2.7.11.13)
P05771	PRKCB PKCB PRKCB1	Protein kinase C beta type (PKC-B) (PKC-beta) (EC 2.7.11.13)
Q05655	PRKCD	Protein kinase C delta type (EC 2.7.11.13) (Tyrosine-protein kinase PRKCD) (EC 2.7.10.2) (nPKC-delta) [Cleaved into: Protein kinase C delta type regulatory subunit; Protein kinase C delta type catalytic subunit (Sphingosine-dependent protein kinase-1) (SDK1)]
C9K0E3	PRKCD	Protein kinase C delta type (Fragment)
Q02156	PRKCE PKCE	Protein kinase C epsilon type (EC 2.7.11.13) (nPKC-epsilon)
P24723	PRKCH PKCL PRKCL	Protein kinase C eta type (EC 2.7.11.13) (PKC-L) (nPKC-eta)
G3V4Q6	PRKCH	Protein kinase C eta type (Fragment)
G3V4Q9	PRKCH	Protein kinase C eta type (Fragment)
G3V304	PRKCH	Protein kinase C eta type (Fragment)
G3V4X4	PRKCH	Protein kinase C eta type (Fragment)
G3V5U5	PRKCH	Protein kinase C eta type (Fragment)
P05129	PRKCG PKCG	Protein kinase C gamma type (PKC-gamma) (EC 2.7.11.13)
P41743	PRKCI DXS1179E	Protein kinase C iota type (EC 2.7.11.13) (Atypical protein kinase C-lambda/iota) (PRKC-lambda/iota) (aPKC-lambda/iota) (nPKC-iota)
Q04759	PRKCQ PRKCT	Protein kinase C theta type (EC 2.7.11.13) (nPKC-theta)
Q05513	PRKCZ PKC2	Protein kinase C zeta type (EC 2.7.11.13) (nPKC-zeta)
F2Z3C5	PRKCZ	Protein kinase C zeta type (Fragment)
A0A087WYS3	ZMYND8	Protein kinase C-binding protein 1
A0A087WV57	ZMYND8	Protein kinase C-binding protein 1
A0A087WVZ6	ZMYND8	Protein kinase C-binding protein 1
Q9ULU4	ZMYND8 KIAA1125 PRKCBP1 RACK7	Protein kinase C-binding protein 1 (Cutaneous T-cell lymphoma-associated antigen se14-3) (CTCL-associated antigen se14-3) (Rack7) (Zinc finger MYND domain-containing protein 8)
H7C4X9	ZMYND8	Protein kinase C-binding protein 1 (Fragment)
Q5TH12	ZMYND8	Protein kinase C-binding protein 1 (Fragment)
Q9H9Z2	LIN28A CSDD1 LIN28 ZCCHC1	Protein lin-28 homolog A (Lin-28A) (Zinc finger CCHC domain-containing protein 1)
A0A1B0GVD3	LIN28B	Protein lin-28 homolog B
A0A1B0GTK2	LIN28B	Protein lin-28 homolog B (Fragment)
Q6ZN17	LIN28B CSDD2	Protein lin-28 homolog B (Lin-28B)
Q9Y6V0	PCLO ACZ KIAA0559	Protein piccolo (Aczonin)
P80511	S100A12	Protein S100-A12 (CGRP) (Calcium-binding protein in amniotic fluid 1) (CAAF1) (Calgranulin-C) (CAGC) (Extracellular newly identified RAGE-binding protein) (EN-RAGE) (Migration inhibitory factor-related protein 6) (MRP-6) (p6) (Neutrophil S100 protein) (S100 calcium-binding protein A12) [Cleaved into: Calcitermin]
Q96FQ6	S100A16 S100F AAG13	Protein S100-A16 (Aging-associated gene 13 protein) (Protein S100-F) (S100 calcium-binding protein A16)
P33764	S100A3 S100E	Protein S100-A3 (Protein S-100E) (S100 calcium-binding protein A3)
P33763	S100A5 S100D	Protein S100-A5 (Protein S-100D) (S100 calcium-binding protein A5)
P31151	S100A7 PSOR1 S100A7C	Protein S100-A7 (Psoriasin) (S100 calcium-binding protein A7)
Q86SG5	S100A7A S100A15 S100A7L1	Protein S100-A7A (S100 calcium-binding protein A15) (S100 calcium-binding protein A7-like 1) (S100 calcium-binding protein A7A)
Q5SY68	S100A7L2 S100A7B	Protein S100-A7-like 2 (S100 calcium-binding protein A7-like 2)
P05109	S100A8 CAGA CFAG MRP8	Protein S100-A8 (Calgranulin-A) (Calprotectin L1L subunit) (Cystic fibrosis antigen) (CFAG) (Leukocyte L1 complex light chain) (Migration inhibitory factor-related protein 8) (MRP-8) (p8) (S100 calcium-binding protein A8) (Urinary stone protein band A)
P06702	S100A9 CAGB CFAG MRP14	Protein S100-A9 (Calgranulin-B) (Calprotectin L1H subunit) (Leukocyte L1 complex heavy chain) (Migration inhibitory factor-related protein 14) (MRP-14) (p14) (S100 calcium-binding protein A9)
P04271	S100B	Protein S100-B (S-100 protein beta chain) (S-100 protein subunit beta) (S100 calcium-binding protein B)
F5H365	SEC23A	Protein transport protein SEC23
Q5QPE1	SEC23B	Protein transport protein SEC23 (Fragment)
Q15437	SEC23B	Protein transport protein Sec23B (hSec23B) (SEC23-related protein B)
P53992	SEC24C KIAA0079	Protein transport protein Sec24C (SEC24-related protein C)
F8W0P6	UNC13A	Protein unc-13 homolog A
F8VZH8	UNC13A	Protein unc-13 homolog A
F8W059	UNC13A	Protein unc-13 homolog A
Q9UPW8	UNC13A KIAA1032	Protein unc-13 homolog A (Munc13-1)
A0A1B0GVW8	UNC13B	Protein unc-13 homolog B
A0A1B0GUS7	UNC13B	Protein unc-13 homolog B
F8W8M9	UNC13B	Protein unc-13 homolog B
B1AM27	UNC13B	Protein unc-13 homolog B
O14795	UNC13B UNC13	Protein unc-13 homolog B (Munc13-2) (munc13)
I6L9J0	UNC13B	Protein unc-13 homolog B (UNC13B protein)
Q8NB66	UNC13C	Protein unc-13 homolog C (Munc13-3)
P15498	VAV1 VAV	Proto-oncogene vav
A0A0A0MR07	VAV1	Proto-oncogene vav
F5H5P4	VAV1	Proto-oncogene vav
Q96D37	VAV1	Proto-oncogene vav (VAV1 protein)
A6NKH3	RPL37AP8 RPL37L	Putative 60S ribosomal protein L37a-like protein (Ribosomal protein L37a pseudogene 8)
Q6P158	DHX57	Putative ATP-dependent RNA helicase DHX57 (EC 3.6.4.13) (DEAH box protein 57)
Q9H4G8	DPH3P1 C20orf143 DPH3B ZCSL1	Putative DPH3 homolog B (CSL-type zinc finger-containing protein 1)
F8VP47	RPH3A	Rabphilin-3A
Q9Y2J0	RPH3A KIAA0985	Rabphilin-3A (Exophilin-1)
Q9H0H5	RACGAP1 KIAA1478 MGCRACGAP	Rac GTPase-activating protein 1 (Male germ cell RacGap) (MgcRacGAP) (Protein CYK4 homolog) (CYK4) (HsCYK-4)
P04049	RAF1 RAF	RAF proto-oncogene serine/threonine-protein kinase (EC 2.7.11.1) (Proto-oncogene c-RAF) (cRaf) (Raf-1)
H7C155	RAF1	RAF proto-oncogene serine/threonine-protein kinase (Fragment)
Q9NS23	RASSF1 RDA32	Ras association domain-containing protein 1
A0A075B763	RASSF5	Ras association domain-containing protein 5
Q8WWW0	RASSF5 NORE1 RAPL	Ras association domain-containing protein 5 (New ras effector 1) (Regulator for cell adhesion and polarization enriched in lymphoid tissues) (RAPL)
A0A0A0MSJ9	RASA2	Ras GTPase-activating protein 2
Q15283	RASA2 GAP1M RASGAP	Ras GTPase-activating protein 2 (GTPase-activating protein 1m) (GAP1m)
Q14644	RASA3	Ras GTPase-activating protein 3 (GAP1(IP4BP)) (Ins P4-binding protein)
E7ERK1	RASA4	Ras GTPase-activating protein 4
O43374	RASA4 CAPRI GAPL KIAA0538	Ras GTPase-activating protein 4 (Calcium-promoted Ras inactivator) (Ras p21 protein activator 4) (RasGAP-activating-like protein 2)
F8W6L0	RASA4B	Ras GTPase-activating protein 4B
C9J798	RASA4B	Ras GTPase-activating protein 4B
F5GXT2	RASA4B	Ras GTPase-activating protein 4B
H0YKM0	RASGRP1	RAS guanyl-releasing protein 1
F5H514	RASGRP1	RAS guanyl-releasing protein 1
O95267	RASGRP1 RASGRP	RAS guanyl-releasing protein 1 (Calcium and DAG-regulated guanine nucleotide exchange factor II) (CalDAG-GEFII) (Ras guanyl-releasing protein)
H0YMF3	RASGRP1	RAS guanyl-releasing protein 1 (Fragment)
Q7LDG7	RASGRP2 CDC25L MCG7	RAS guanyl-releasing protein 2 (Calcium and DAG-regulated guanine nucleotide exchange factor I) (CalDAG-GEFI) (Cdc25-like protein) (hCDC25L) (F25B3.3 kinase-like protein)
Q8IV61	RASGRP3 GRP3 KIAA0846	Ras guanyl-releasing protein 3 (Calcium and DAG-regulated guanine nucleotide exchange factor III) (Guanine nucleotide exchange factor for Rap1)
Q8TDF6	RASGRP4	RAS guanyl-releasing protein 4
O95294	RASAL1 RASAL	RasGAP-activating-like protein 1 (RAS protein activator like 1) (Ras GTPase-activating-like protein)
Q15493	RGN SMP30	Regucalcin (RC) (Gluconolactonase) (GNL) (EC 3.1.1.17) (Senescence marker protein 30) (SMP-30)
Q86UR5	RIMS1 KIAA0340 RAB3IP2 RIM1 Nbla00761	Regulating synaptic membrane exocytosis protein 1 (Rab-3-interacting molecule 1) (RIM 1) (Rab-3-interacting protein 2)
A0A0J9YWD4	RIMS2	Regulating synaptic membrane exocytosis protein 2 (Fragment)
Q9UQ26	RIMS2 KIAA0751 RAB3IP3 RIM2	Regulating synaptic membrane exocytosis protein 2 (Rab-3-interacting molecule 2) (RIM 2) (Rab-3-interacting protein 3)
Q8N8U3	RTL3 MAR3 MART3 ZCCHC5	Retrotransposon Gag-like protein 3 (Zinc finger CCHC domain-containing protein 5)
F8VWZ8	ARHGAP29	Rho GTPase-activating protein 29
Q52LW3	ARHGAP29 PARG1	Rho GTPase-activating protein 29 (PTPL1-associated RhoGAP protein 1) (Rho-type GTPase-activating protein 29)
A0A087WZG4	ARHGEF18	Rho guanine nucleotide exchange factor 18 (Fragment)
Q8N1W1	ARHGEF28 KIAA1998 RGNEF	Rho guanine nucleotide exchange factor 28 (190 kDa guanine nucleotide exchange factor) (p190-RhoGEF) (p190RhoGEF) (Rho guanine nucleotide exchange factor)
Q13464	ROCK1	Rho-associated protein kinase 1 (EC 2.7.11.1) (Renal carcinoma antigen NY-REN-35) (Rho-associated, coiled-coil-containing protein kinase 1) (Rho-associated, coiled-coil-containing protein kinase I) (ROCK-I) (p160 ROCK-1) (p160ROCK)
E9PF63	ROCK2	Rho-associated protein kinase 2
O75116	ROCK2 KIAA0619	Rho-associated protein kinase 2 (EC 2.7.11.1) (Rho kinase 2) (Rho-associated, coiled-coil-containing protein kinase 2) (Rho-associated, coiled-coil-containing protein kinase II) (ROCK-II) (p164 ROCK-2)
D6RG19	RPL37	Ribosomal protein L37
D6R9X9	RPL37	Ribosomal protein L37
P98175	RBM10 DXS8237E GPATC9 GPATCH9 KIAA0122	RNA-binding protein 10 (G patch domain-containing protein 9) (RNA-binding motif protein 10) (RNA-binding protein S1-1) (S1-1)
Q9BWF3	RBM4 RBM4A	RNA-binding protein 4 (Lark homolog) (hLark) (RNA-binding motif protein 4) (RNA-binding motif protein 4a)
Q9BQ04	RBM4B RBM30	RNA-binding protein 4B (RNA-binding motif protein 30) (RNA-binding motif protein 4B) (RNA-binding protein 30)
P52756	RBM5 H37 LUCA15	RNA-binding protein 5 (Protein G15) (Putative tumor suppressor LUCA15) (RNA-binding motif protein 5) (Renal carcinoma antigen NY-REN-9)
A0A0D9SFL3	EWSR1	RNA-binding protein EWS
B0QYK0	EWSR1	RNA-binding protein EWS
Q01844	EWSR1 EWS	RNA-binding protein EWS (EWS oncogene) (Ewing sarcoma breakpoint region 1 protein)
H3BPE7	FUS	RNA-binding protein FUS
P35637	FUS TLS	RNA-binding protein FUS (75 kDa DNA-pairing protein) (Oncogene FUS) (Oncogene TLS) (POMp75) (Translocated in liposarcoma protein)
Q16629	SRSF7 SFRS7	Serine/arginine-rich splicing factor 7 (Splicing factor 9G8) (Splicing factor, arginine/serine-rich 7)
C9JAB2	SRSF7	Serine/arginine-rich-splicing factor 7
F8WEA1	SRSF7	Serine/arginine-rich-splicing factor 7
A0A0B4J1Z1	SRSF7 SFRS7 hCG_15878	Serine/arginine-rich-splicing factor 7 (Splicing factor, arginine/serine-rich 7, 35kDa, isoform CRA_a)
F8WBA3	PRKD1	Serine/threonine-protein kinase (EC 2.7.11.13)
P10398	ARAF ARAF1 PKS PKS2	Serine/threonine-protein kinase A-Raf (EC 2.7.11.1) (Proto-oncogene A-Raf) (Proto-oncogene A-Raf-1) (Proto-oncogene Pks)
H7C560	BRAF	Serine/threonine-protein kinase B-raf
P15056	BRAF BRAF1 RAFB1	Serine/threonine-protein kinase B-raf (EC 2.7.11.1) (Proto-oncogene B-Raf) (p94) (v-Raf murine sarcoma viral oncogene homolog B1)
Q15139	PRKD1 PKD PKD1 PRKCM	Serine/threonine-protein kinase D1 (EC 2.7.11.13) (Protein kinase C mu type) (Protein kinase D) (nPKC-D1) (nPKC-mu)
F8VZ98	PRKD1	Serine/threonine-protein kinase D1 (Fragment)
Q9BZL6	PRKD2 PKD2 HSPC187	Serine/threonine-protein kinase D2 (EC 2.7.11.13) (nPKC-D2)
O94806	PRKD3 EPK2 PRKCN	Serine/threonine-protein kinase D3 (EC 2.7.11.13) (Protein kinase C nu type) (Protein kinase EPK2) (nPKC-nu)
C9JKP8	PRKD3	Serine/threonine-protein kinase D3 (Fragment)
A0A0A0MRJ1	CDC42BPA	Serine/threonine-protein kinase MRCK alpha
Q5VT25	CDC42BPA KIAA0451	Serine/threonine-protein kinase MRCK alpha (EC 2.7.11.1) (CDC42-binding protein kinase alpha) (DMPK-like alpha) (Myotonic dystrophy kinase-related CDC42-binding kinase alpha) (MRCK alpha) (Myotonic dystrophy protein kinase-like alpha)
H0Y6V3	CDC42BPA	Serine/threonine-protein kinase MRCK alpha (Fragment)
Q9Y5S2	CDC42BPB KIAA1124	Serine/threonine-protein kinase MRCK beta (EC 2.7.11.1) (CDC42-binding protein kinase beta) (CDC42BP-beta) (DMPK-like beta) (Myotonic dystrophy kinase-related CDC42-binding kinase beta) (MRCK beta) (Myotonic dystrophy protein kinase-like beta)
H0YLY0	CDC42BPB	Serine/threonine-protein kinase MRCK beta (Fragment)
Q6DT37	CDC42BPG DMPK2	Serine/threonine-protein kinase MRCK gamma (EC 2.7.11.1) (CDC42-binding protein kinase gamma) (DMPK-like gamma) (Myotonic dystrophy kinase-related CDC42-binding kinase gamma) (MRCK gamma) (MRCKG) (Myotonic dystrophy protein kinase-like gamma) (Myotonic dystrophy protein kinase-like alpha)
Q99469	STAC STAC1	SH3 and cysteine-rich domain-containing protein (Src homology 3 and cysteine-rich domain-containing protein)
Q6ZMT1	STAC2	SH3 and cysteine-rich domain-containing protein 2 (24b2/STAC2) (Src homology 3 and cysteine-rich domain-containing protein 2)
Q96MF2	STAC3	SH3 and cysteine-rich domain-containing protein 3
Q9H2M3	BHMT2	S-methylmethionine--homocysteine S-methyltransferase BHMT2 (SMM-hcy methyltransferase) (EC 2.1.1.10) (Betaine--homocysteine S-methyltransferase 2)
H0YLA4	SORD	Sorbitol dehydrogenase
Q00796	SORD	Sorbitol dehydrogenase (EC 1.1.1.14) (L-iditol 2-dehydrogenase)
Q9H6E5	TUT1 RBM21	Speckle targeted PIP5K1A-regulated poly(A) polymerase (Star-PAP) (EC 2.7.7.19) (RNA-binding motif protein 21) (RNA-binding protein 21) (U6 snRNA-specific terminal uridylyltransferase 1) (U6-TUTase) (EC 2.7.7.52)
Q15637	SF1 ZFM1 ZNF162	Splicing factor 1 (Mammalian branch point-binding protein) (BBP) (mBBP) (Transcription factor ZFM1) (Zinc finger gene in MEN1 locus) (Zinc finger protein 162)
Q8WU68	U2AF1L4 U2AF1-RS3 U2AF1L3	Splicing factor U2AF 26 kDa subunit (U2 auxiliary factor 26) (U2 small nuclear RNA auxiliary factor 1-like protein 4) (U2AF1-like 4) (U2(RNU2) small nuclear RNA auxiliary factor 1-like protein 3) (U2 small nuclear RNA auxiliary factor 1-like protein 3) (U2AF1-like protein 3)
Q01081	U2AF1 U2AF35 U2AFBP FP793	Splicing factor U2AF 35 kDa subunit (U2 auxiliary factor 35 kDa subunit) (U2 small nuclear RNA auxiliary factor 1) (U2 snRNP auxiliary factor small subunit)
P0DN76	U2AF1L5	Splicing factor U2AF 35 kDa subunit-like protein (U2 small nuclear RNA auxiliary factor 1-like protein 5)
H7BYH4	SOD1	Superoxide dismutase [Cu-Zn] (EC 1.15.1.1)
P00441	SOD1	Superoxide dismutase [Cu-Zn] (EC 1.15.1.1) (Superoxide dismutase 1) (hSod1)
Q96C24	SYTL4	Synaptotagmin-like protein 4 (Exophilin-2) (Granuphilin)
Q8TDW5	SYTL5 SLP5	Synaptotagmin-like protein 5
O95271	TNKS PARP5A PARPL TIN1 TINF1 TNKS1	Tankyrase-1 (TANK1) (EC 2.4.2.30) (ADP-ribosyltransferase diphtheria toxin-like 5) (ARTD5) (Poly [ADP-ribose] polymerase 5A) (TNKS-1) (TRF1-interacting ankyrin-related ADP-ribose polymerase) (Tankyrase I)
Q9H2K2	TNKS2 PARP5B TANK2 TNKL	Tankyrase-2 (TANK2) (EC 2.4.2.30) (ADP-ribosyltransferase diphtheria toxin-like 6) (ARTD6) (Poly [ADP-ribose] polymerase 5B) (TNKS-2) (TRF1-interacting ankyrin-related ADP-ribose polymerase 2) (Tankyrase II) (Tankyrase-like protein) (Tankyrase-related protein)
A0A075B7D9	TAF15	TATA-binding protein-associated factor 2N
Q92804	TAF15 RBP56 TAF2N	TATA-binding protein-associated factor 2N (68 kDa TATA-binding protein-associated factor) (TAF(II)68) (TAFII68) (RNA-binding protein 56)
F8VV64	TNS2	Tensin-2
Q63HR2	TNS2 KIAA1075 TENC1	Tensin-2 (EC 3.1.3.-) (C1 domain-containing phosphatase and tensin homolog) (C1-TEN) (Tensin-like C1 domain-containing phosphatase)
A0A0C4DFM7	TUT4	Terminal uridylyltransferase 4
H0YDJ1	TUT4	Terminal uridylyltransferase 4 (Fragment)
H0YEE8	TUT4	Terminal uridylyltransferase 4 (Fragment)
Q5TAX3	TUT4 KIAA0191 ZCCHC11	Terminal uridylyltransferase 4 (TUTase 4) (EC 2.7.7.52) (Zinc finger CCHC domain-containing protein 11)
X6R3Q3	TUT7	Terminal uridylyltransferase 7
A0A0C4DFW3	TUT7	Terminal uridylyltransferase 7
Q5VYS8	TUT7 HS2 KIAA1711 ZCCHC6	Terminal uridylyltransferase 7 (TUTase 7) (EC 2.7.7.52) (Zinc finger CCHC domain-containing protein 6)
O43897	TLL1 TLL	Tolloid-like protein 1 (EC 3.4.24.-)
Q9Y6L7	TLL2 KIAA0932	Tolloid-like protein 2 (EC 3.4.24.-)
O15164	TRIM24 RNF82 TIF1 TIF1A	Transcription intermediary factor 1-alpha (TIF1-alpha) (EC 2.3.2.27) (E3 ubiquitin-protein ligase TRIM24) (RING finger protein 82) (RING-type E3 ubiquitin transferase TIF1-alpha) (Tripartite motif-containing protein 24)
P46100	ATRX RAD54L XH2	Transcriptional regulator ATRX (EC 3.6.4.12) (ATP-dependent helicase ATRX) (X-linked helicase II) (X-linked nuclear protein) (XNP) (Znf-HX)
Q9BX84	TRPM6 CHAK2	Transient receptor potential cation channel subfamily M member 6 (EC 2.7.11.1) (Channel kinase 2) (Melastatin-related TRP cation channel 6)
Q96QT4	TRPM7 CHAK1 LTRPC7	Transient receptor potential cation channel subfamily M member 7 (EC 2.7.11.1) (Channel-kinase 1) (Long transient receptor potential channel 7) (LTrpC-7) (LTrpC7)
Q9C040	TRIM2 KIAA0517 RNF86	Tripartite motif-containing protein 2 (EC 2.3.2.27) (E3 ubiquitin-protein ligase TRIM2) (RING finger protein 86) (RING-type E3 ubiquitin transferase TRIM2)
O75382	TRIM3 BERP RNF22 RNF97	Tripartite motif-containing protein 3 (Brain-expressed RING finger protein) (RING finger protein 22) (RING finger protein 97)
Q8IWZ5	TRIM42	Tripartite motif-containing protein 42
O15016	TRIM66 C11orf29 KIAA0298	Tripartite motif-containing protein 66
B5MCJ9	TRIM66	Tripartite motif-containing protein 66
H0YF52	TRIM66	Tripartite motif-containing protein 66 (Fragment)
F8W8C1	TRIM67	Tripartite motif-containing protein 67
Q6ZTA4	TRIM67 TNL	Tripartite motif-containing protein 67 (TRIM9-like protein)
Q9BUB4	ADAT1	tRNA-specific adenosine deaminase 1 (hADAT1) (EC 3.5.4.34) (tRNA-specific adenosine-37 deaminase)
P50591	TNFSF10 APO2L TRAIL	Tumor necrosis factor ligand superfamily member 10 (Apo-2 ligand) (Apo-2L) (TNF-related apoptosis-inducing ligand) (Protein TRAIL) (CD antigen CD253)
Q9H3D4	TP63 KET P63 P73H P73L TP73L	Tumor protein 63 (p63) (Chronic ulcerative stomatitis protein) (CUSP) (Keratinocyte transcription factor KET) (Transformation-related protein 63) (TP63) (Tumor protein p73-like) (p73L) (p40) (p51)
O15350	TP73 P73	Tumor protein p73 (p53-like transcription factor) (p53-related protein)
U3NG26	BTK	Tyrosine-protein kinase (EC 2.7.10.2)
Q5JY90	BTK hCG_20400	Tyrosine-protein kinase (EC 2.7.10.2)
Q9UIG0	BAZ1B WBSC10 WBSCR10 WBSCR9 WSTF	Tyrosine-protein kinase BAZ1B (EC 2.7.10.2) (Bromodomain adjacent to zinc finger domain protein 1B) (Williams syndrome transcription factor) (Williams-Beuren syndrome chromosomal region 10 protein) (Williams-Beuren syndrome chromosomal region 9 protein) (hWALp2)
Q06187	BTK AGMX1 ATK BPK	Tyrosine-protein kinase BTK (EC 2.7.10.2) (Agammaglobulinemia tyrosine kinase) (ATK) (B-cell progenitor kinase) (BPK) (Bruton tyrosine kinase)
Q08881	ITK EMT LYK	Tyrosine-protein kinase ITK/TSK (EC 2.7.10.2) (Interleukin-2-inducible T-cell kinase) (IL-2-inducible T-cell kinase) (Kinase EMT) (T-cell-specific kinase) (Tyrosine-protein kinase Lyk)
P42680	TEC PSCTK4	Tyrosine-protein kinase Tec (EC 2.7.10.2)
Q15695	ZRSR1 U2AF1-RS1 U2AF1L1 U2AF1P U2AF1RS1 U2AFBPL	U2 small nuclear ribonucleoprotein auxiliary factor 35 kDa subunit-related protein 1 (CCCH type zinc finger, RNA-binding motif and serine/arginine rich protein 1) (U2(RNU2) small nuclear RNA auxiliary factor 1-like 1)
Q15696	ZRSR2 U2AF1-RS2 U2AF1L2 U2AF1RS2 URP	U2 small nuclear ribonucleoprotein auxiliary factor 35 kDa subunit-related protein 2 (CCCH type zinc finger, RNA-binding motif and serine/arginine rich protein 2) (Renal carcinoma antigen NY-REN-20) (U2(RNU2) small nuclear RNA auxiliary factor 1-like 2) (U2AF35-related protein) (URP)
P62979	RPS27A UBA80 UBCEP1	Ubiquitin-40S ribosomal protein S27a (Ubiquitin carboxyl extension protein 80) [Cleaved into: Ubiquitin; 40S ribosomal protein S27a (Small ribosomal subunit protein eS31)]
H0Y626		Uncharacterized protein
H3BRD5	MYO9A	Unconventional myosin-IXa
B2RTY4	MYO9A MYR7	Unconventional myosin-IXa (Unconventional myosin-9a)
M0R0P8	MYO9B	Unconventional myosin-IXb
Q13459	MYO9B MYR5	Unconventional myosin-IXb (Unconventional myosin-9b)
P46939	UTRN DMDL DRP1	Utrophin (Dystrophin-related protein 1) (DRP-1)
O95180	CACNA1H	Voltage-dependent T-type calcium channel subunit alpha-1H (Low-voltage-activated calcium channel alpha1 3.2 subunit) (Voltage-gated calcium channel subunit alpha Cav3.2)
Q8IWB7	WDFY1 KIAA1435 WDF1 ZFYVE17	WD repeat and FYVE domain-containing protein 1 (FENS-1) (Phosphoinositide-binding protein 1) (WD40- and FYVE domain-containing protein 1) (Zinc finger FYVE domain-containing protein 17)
Q96P53	WDFY2 WDF2 ZFYVE22	WD repeat and FYVE domain-containing protein 2 (Propeller-FYVE protein) (Prof) (WD40- and FYVE domain-containing protein 2) (Zinc finger FYVE domain-containing protein 22)
Q14191	WRN RECQ3 RECQL2	Werner syndrome ATP-dependent helicase (EC 3.6.4.12) (DNA helicase, RecQ-like type 3) (RecQ3) (Exonuclease WRN) (EC 3.1.-.-) (RecQ protein-like 2)
O43895	XPNPEP2	Xaa-Pro aminopeptidase 2 (EC 3.4.11.9) (Aminoacylproline aminopeptidase) (Membrane-bound aminopeptidase P) (Membrane-bound APP) (Membrane-bound AmP) (mAmP) (X-Pro aminopeptidase 2)
Q8WW36	ZCCHC13	Zinc finger CCHC domain-containing protein 13
Q8WYQ9	ZCCHC14 KIAA0579	Zinc finger CCHC domain-containing protein 14 (BDG-29)
H3BS18	ZCCHC14	Zinc finger CCHC domain-containing protein 14 (Fragment)
Q9C0B9	ZCCHC2 C18orf49 KIAA1744	Zinc finger CCHC domain-containing protein 2
K7ERQ9	ZCCHC2	Zinc finger CCHC domain-containing protein 2 (Fragment)
K7ESN2	ZCCHC2	Zinc finger CCHC domain-containing protein 2 (Fragment)
Q9NUD5	ZCCHC3 C20orf99	Zinc finger CCHC domain-containing protein 3
Q8N3Z6	ZCCHC7 HSPC086	Zinc finger CCHC domain-containing protein 7 (TRAMP-like complex RNA-binding factor ZCCHC7)
Q6NZY4	ZCCHC8	Zinc finger CCHC domain-containing protein 8 (TRAMP-like complex RNA-binding factor ZCCHC8)
Q8N567	ZCCHC9	Zinc finger CCHC domain-containing protein 9
G3V1V1	ZCRB1 hCG_1818570	Zinc finger CCHC-type and RNA binding motif 1, isoform CRA_b (Zinc finger CCHC-type and RNA-binding motif-containing protein 1)
F8VXY6	ZCRB1	Zinc finger CCHC-type and RNA-binding motif-containing protein 1 (Fragment)
Q8TBF4	ZCRB1	Zinc finger CCHC-type and RNA-binding motif-containing protein 1 (U11/U12 small nuclear ribonucleoprotein 31 kDa protein) (U11/U12 snRNP 31 kDa protein) (U11/U12-31K)
P37275	ZEB1 AREB6 TCF8	Zinc finger E-box-binding homeobox 1 (NIL-2-A zinc finger protein) (Negative regulator of IL2) (Transcription factor 8) (TCF-8)
E7EUW9	ZEB2	Zinc finger E-box-binding homeobox 2 (Fragment)
Q9C0A1	ZFHX2 KIAA1056 KIAA1762 ZNF409	Zinc finger homeobox protein 2 (Zinc finger homeodomain protein 2) (ZFH-2)
Q15911	ZFHX3 ATBF1	Zinc finger homeobox protein 3 (AT motif-binding factor 1) (AT-binding transcription factor 1) (Alpha-fetoprotein enhancer-binding protein) (Zinc finger homeodomain protein 3) (ZFH-3)
E7EVZ1	ZFHX4	Zinc finger homeobox protein 4
Q86UP3	ZFHX4	Zinc finger homeobox protein 4 (Zinc finger homeodomain protein 4) (ZFH-4)
E7ENI9	ZMYND11	Zinc finger MYND domain-containing protein 11
B0QZE2	ZMYND11	Zinc finger MYND domain-containing protein 11
A0A0A0MRY2	ZMYND11	Zinc finger MYND domain-containing protein 11
Q15326	ZMYND11 BRAM1 BS69	Zinc finger MYND domain-containing protein 11 (Adenovirus 5 E1A-binding protein) (Bone morphogenetic protein receptor-associated molecule 1) (Protein BS69)
B7Z2J6	ZMYND11	Zinc finger MYND domain-containing protein 11 (cDNA FLJ50504, highly similar to Mus musculus zinc finger, MYND domain containing 11 (Zmynd11), mRNA)
J3QKD2	ZMYND11 hCG_23206	Zinc finger MYND domain-containing protein 11 (Zinc finger, MYND domain containing 11, isoform CRA_d)
Q9H2Y7	ZNF106 SH3BP3 ZFP106 ZNF474	Zinc finger protein 106 (Zfp-106) (Zinc finger protein 474)
Q14966	ZNF638 NP220 ZFML	Zinc finger protein 638 (Cutaneous T-cell lymphoma-associated antigen se33-1) (CTCL-associated antigen se33-1) (Nuclear protein 220) (Zinc finger matrin-like protein)
Q9UKY1	ZHX1	Zinc fingers and homeoboxes protein 1
Q9Y6X8	ZHX2 AFR1 KIAA0854 RAF	Zinc fingers and homeoboxes protein 2 (Alpha-fetoprotein regulator 1) (AFP regulator 1) (Regulator of AFP) (Zinc finger and homeodomain protein 2)
Q9H4I2	ZHX3 KIAA0395 TIX1	Zinc fingers and homeoboxes protein 3 (Triple homeobox protein 1) (Zinc finger and homeodomain protein 3)
Q9H777	ELAC1 D29	Zinc phosphodiesterase ELAC protein 1 (EC 3.1.26.11) (Deleted in Ma29) (ElaC homolog protein 1) (Ribonuclease Z 1) (RNase Z 1) (tRNA 3 endonuclease 1) (tRNase Z 1)
Q9Y6M5	SLC30A1 ZNT1	Zinc transporter 1 (ZnT-1) (Solute carrier family 30 member 1)
Q6XR72	SLC30A10 ZNT10 ZNT8	Zinc transporter 10 (ZnT-10) (Manganese transporter SLC30A10) (Solute carrier family 30 member 10)
Q9BRI3	SLC30A2 ZNT2	Zinc transporter 2 (ZnT-2) (Solute carrier family 30 member 2)
Q99726	SLC30A3 ZNT3	Zinc transporter 3 (ZnT-3) (Solute carrier family 30 member 3)
O14863	SLC30A4 ZNT4	Zinc transporter 4 (ZnT-4) (Solute carrier family 30 member 4)
Q8TAD4	SLC30A5 ZNT5 ZNTL1 ZTL1 UNQ863/PRO1879	Zinc transporter 5 (ZnT-5) (Solute carrier family 30 member 5) (ZnT-like transporter 1) (hZTL1)
Q6NXT4	SLC30A6 ZNT6	Zinc transporter 6 (ZnT-6) (Solute carrier family 30 member 6)
Q8NEW0	SLC30A7 ZNT7 ZNTL2	Zinc transporter 7 (ZnT-7) (Solute carrier family 30 member 7) (Znt-like transporter 2)
Q8IWU4	SLC30A8 ZNT8	Zinc transporter 8 (ZnT-8) (Solute carrier family 30 member 8)
Q6PML9	SLC30A9 C4orf1 HUEL	Zinc transporter 9 (ZnT-9) (Human embryonic lung protein) (HuEL) (Solute carrier family 30 member 9)
Q92504	SLC39A7 HKE4 RING5	Zinc transporter SLC39A7 (Histidine-rich membrane protein Ke4) (Really interesting new gene 5 protein) (Solute carrier family 39 member 7) (Zrt-, Irt-like protein 7) (ZIP7)
Q9NY26	SLC39A1 IRT1 ZIP1 ZIRTL CGI-08 CGI-71	Zinc transporter ZIP1 (Solute carrier family 39 member 1) (Zinc-iron-regulated transporter-like) (Zrt- and Irt-like protein 1) (ZIP-1) (hZIP1)
Q9ULF5	SLC39A10 KIAA1265 ZIP10	Zinc transporter ZIP10 (Solute carrier family 39 member 10) (Zrt- and Irt-like protein 10) (ZIP-10)
Q8N1S5	SLC39A11 C17orf26 ZIP11	Zinc transporter ZIP11 (Solute carrier family 39 member 11) (Zrt- and Irt-like protein 11) (ZIP-11)
Q504Y0	SLC39A12 ZIP12	Zinc transporter ZIP12 (LIV-1 subfamily of ZIP zinc transporter 8) (LZT-Hs8) (Solute carrier family 39 member 12) (Zrt- and Irt-like protein 12) (ZIP-12)
Q96H72	SLC39A13 ZIP13	Zinc transporter ZIP13 (LIV-1 subfamily of ZIP zinc transporter 9) (LZT-Hs9) (Solute carrier family 39 member 13) (Zrt- and Irt-like protein 13) (ZIP-13)
Q15043	SLC39A14 KIAA0062 ZIP14	Zinc transporter ZIP14 (LIV-1 subfamily of ZIP zinc transporter 4) (LZT-Hs4) (Solute carrier family 39 member 14) (Zrt- and Irt-like protein 14) (ZIP-14)
Q9NP94	SLC39A2 ZIP2	Zinc transporter ZIP2 (6A1) (Eti-1) (Solute carrier family 39 member 2) (Zrt- and Irt-like protein 2) (ZIP-2) (hZIP2)
Q9BRY0	SLC39A3 ZIP3	Zinc transporter ZIP3 (Solute carrier family 39 member 3) (Zrt- and Irt-like protein 3) (ZIP-3)
Q6P5W5	SLC39A4 ZIP4	Zinc transporter ZIP4 (Solute carrier family 39 member 4) (Zrt- and Irt-like protein 4) (ZIP-4)
Q6ZMH5	SLC39A5 ZIP5	Zinc transporter ZIP5 (Solute carrier family 39 member 5) (Zrt- and Irt-like protein 5) (ZIP-5)
Q13433	SLC39A6 LIV1 ZIP6	Zinc transporter ZIP6 (Estrogen-regulated protein LIV-1) (Solute carrier family 39 member 6) (Zrt- and Irt-like protein 6) (ZIP-6)
Q9C0K1	SLC39A8 BIGM103 ZIP8 PP3105	Zinc transporter ZIP8 (BCG-induced integral membrane protein in monocyte clone 103 protein) (LIV-1 subfamily of ZIP zinc transporter 6) (LZT-Hs6) (Solute carrier family 39 member 8) (Zrt- and Irt-like protein 8) (ZIP-8)
Q9NUM3	SLC39A9 ZIP9 UNQ714/PRO1377	Zinc transporter ZIP9 (Solute carrier family 39 member 9) (Zrt- and Irt-like protein 9) (ZIP-9)
Q401N2	ZACN L2 LGICZ LGICZ1 ZAC	Zinc-activated ligand-gated ion channel (Ligand-gated ion channel zinc-activated 1) (Ligand-gated ion-channel receptor L2)

## Sheet: Ca_proteins in Cadmium
Entry	Gene names	Protein names
Q8IZ41	RASEF RAB45	Ras and EF-hand domain-containing protein (Ras-related protein Rab-45)
P35243	RCVRN RCV1	Recoverin (Cancer-associated retinopathy protein) (Protein CAR)
Q15493	RGN SMP30	Regucalcin (RC) (Gluconolactonase) (GNL) (EC 3.1.1.17) (Senescence marker protein 30) (SMP-30)
O14827	RASGRF2 GRF2	Ras-specific guanine nucleotide-releasing factor 2 (Ras-GRF2) (Ras guanine nucleotide exchange factor 2)
A2VEC9	SSPO KIAA2036	SCO-spondin
O95425	SVIL	Supervillin (Archvillin) (p205/p250)
Q13425	SNTB2 D16S2531E SNT2B2 SNTL	Beta-2-syntrophin (59 kDa dystrophin-associated protein A1 basic component 2) (Syntrophin-3) (SNT3) (Syntrophin-like) (SNTL)
Q6UWL2	SUSD1 UNQ2438/PRO4999	Sushi domain-containing protein 1
Q9P246	STIM2 KIAA1482	Stromal interaction molecule 2
Q9H2B2	SYT4 KIAA1342	Synaptotagmin-4 (Synaptotagmin IV) (SytIV)
P04271	S100B	Protein S100-B (S-100 protein beta chain) (S-100 protein subunit beta) (S100 calcium-binding protein B)
P35247	SFTPD COLEC7 PSPD SFTP4	Pulmonary surfactant-associated protein D (PSP-D) (SP-D) (Collectin-7) (Lung surfactant protein D)
P25815	S100P S100E	Protein S100-P (Migration-inducing gene 9 protein) (MIG9) (Protein S100-E) (S100 calcium-binding protein P)
Q8IWY4	SCUBE1	Signal peptide, CUB and EGF-like domain-containing protein 1
P06703	S100A6 CACY	Protein S100-A6 (Calcyclin) (Growth factor-inducible protein 2A9) (MLN 4) (Prolactin receptor-associated protein) (PRA) (S100 calcium-binding protein A6)
Q6NUK1	SLC25A24 APC1 MCSC1 SCAMC1	Calcium-binding mitochondrial carrier protein SCaMC-1 (Mitochondrial ATP-Mg/Pi carrier protein 1) (Mitochondrial Ca(2+)-dependent solute carrier protein 1) (Small calcium-binding mitochondrial carrier protein 1) (Solute carrier family 25 member 24)
P23297	S100A1 S100A	Protein S100-A1 (S-100 protein alpha chain) (S-100 protein subunit alpha) (S100 calcium-binding protein A1)
Q8WXG8	S100Z	Protein S100-Z (S100 calcium-binding protein Z)
Q13424	SNTA1 SNT1	Alpha-1-syntrophin (59 kDa dystrophin-associated protein A1 acidic component 1) (Pro-TGF-alpha cytoplasmic domain-interacting protein 1) (TACIP1) (Syntrophin-1)
P21579	SYT1 SVP65 SYT	Synaptotagmin-1 (Synaptotagmin I) (SytI) (p65)
Q13813	SPTAN1 NEAS SPTA2	Spectrin alpha chain, non-erythrocytic 1 (Alpha-II spectrin) (Fodrin alpha chain) (Spectrin, non-erythroid alpha subunit)
Q9BT88	SYT11 KIAA0080	Synaptotagmin-11 (Synaptotagmin XI) (SytXI)
P80511	S100A12	Protein S100-A12 (CGRP) (Calcium-binding protein in amniotic fluid 1) (CAAF1) (Calgranulin-C) (CAGC) (Extracellular newly identified RAGE-binding protein) (EN-RAGE) (Migration inhibitory factor-related protein 6) (MRP-6) (p6) (Neutrophil S100 protein) (S100 calcium-binding protein A12) [Cleaved into: Calcitermin]
Q9BUY7	EFCAB11 C14orf143	EF-hand calcium-binding domain-containing protein 11
Q8N7B9	EFCAB3	EF-hand calcium-binding domain-containing protein 3
P23634	ATP2B4 ATP2B2 MXRA1	Plasma membrane calcium-transporting ATPase 4 (PMCA4) (EC 3.6.3.8) (Matrix-remodeling-associated protein 1) (Plasma membrane calcium ATPase isoform 4) (Plasma membrane calcium pump isoform 4)
O75185	ATP2C2 KIAA0703 SPCA2	Calcium-transporting ATPase type 2C member 2 (ATPase 2C2) (EC 3.6.3.8) (Secretory pathway Ca(2+)-ATPase 2)
Q76LX8	ADAMTS13 C9orf8 UNQ6102/PRO20085	A disintegrin and metalloproteinase with thrombospondin motifs 13 (ADAM-TS 13) (ADAM-TS13) (ADAMTS-13) (EC 3.4.24.87) (von Willebrand factor-cleaving protease) (vWF-CP) (vWF-cleaving protease)
O43745	CHP2 HCA520	Calcineurin B homologous protein 2 (Hepatocellular carcinoma-associated antigen 520)
P20908	COL5A1	Collagen alpha-1(V) chain
P08123	COL1A2	Collagen alpha-2(I) chain (Alpha-2 type I collagen)
Q9Y6Z7	COLEC10 CLL1 UNQ366/PRO702	Collectin-10 (Collectin liver protein 1) (CL-L1) (Collectin-34) (CL-34)
P02461	COL3A1	Collagen alpha-1(III) chain
P02452	COL1A1	Collagen alpha-1(I) chain (Alpha-1 type I collagen)
P02458	COL2A1	Collagen alpha-1(II) chain (Alpha-1 type II collagen) [Cleaved into: Collagen alpha-1(II) chain; Chondrocalcin]
P49747	COMP	Cartilage oligomeric matrix protein (COMP) (Thrombospondin-5) (TSP5)
Q9UHI8	ADAMTS1 KIAA1346 METH1	A disintegrin and metalloproteinase with thrombospondin motifs 1 (ADAM-TS 1) (ADAM-TS1) (ADAMTS-1) (EC 3.4.24.-) (METH-1)
Q9NRD9	DUOX1 DUOX LNOX1 THOX1	Dual oxidase 1 (EC 1.11.1.-) (EC 1.6.3.1) (Large NOX 1) (Long NOX 1) (NADPH thyroid oxidase 1) (Thyroid oxidase 1)
Q86XQ3	CATSPER3	Cation channel sperm-associated protein 3 (CatSper3) (Ca(v)-like protein) (One-repeat calcium channel-like protein)
O60494	CUBN IFCR	Cubilin (460 kDa receptor) (Intestinal intrinsic factor receptor) (Intrinsic factor-cobalamin receptor) (Intrinsic factor-vitamin B12 receptor)
A0PJX0	CIB4	Calcium and integrin-binding family member 4
Q9NYQ6	CELSR1 CDHF9 FMI2	Cadherin EGF LAG seven-pass G-type receptor 1 (Cadherin family member 9) (Flamingo homolog 2) (hFmi2)
Q03692	COL10A1	Collagen alpha-1(X) chain
Q9NYQ7	CELSR3 CDHF11 EGFL1 FMI1 KIAA0812 MEGF2	Cadherin EGF LAG seven-pass G-type receptor 3 (Cadherin family member 11) (Epidermal growth factor-like protein 1) (EGF-like protein 1) (Flamingo homolog 1) (hFmi1) (Multiple epidermal growth factor-like domains protein 2) (Multiple EGF-like domains protein 2)
Q9NPF0	CD320 8D6A UNQ198/PRO224	CD320 antigen (8D6 antigen) (FDC-signaling molecule 8D6) (FDC-SM-8D6) (Transcobalamin receptor) (TCblR) (CD antigen CD320)
O15182	CETN3 CEN3	Centrin-3
P05156	CFI IF	Complement factor I (EC 3.4.21.45) (C3B/C4B inactivator) [Cleaved into: Complement factor I heavy chain; Complement factor I light chain]
O43707	ACTN4	Alpha-actinin-4 (Non-muscle alpha-actinin 4)
O14727	APAF1 KIAA0413	Apoptotic protease-activating factor 1 (APAF-1)
P13497	BMP1 PCOLC	Bone morphogenetic protein 1 (BMP-1) (EC 3.4.24.19) (Mammalian tolloid protein) (mTld) (Procollagen C-proteinase) (PCP)
Q5VU97	CACHD1 KIAA1573 VWCD1	VWFA and cache domain-containing protein 1 (Cache domain-containing protein 1)
P57796	CABP4	Calcium-binding protein 4 (CaBP4)
Q9NP86	CABP5 CABP3	Calcium-binding protein 5 (CaBP5)
Q9NY47	CACNA2D2 KIAA0558	Voltage-dependent calcium channel subunit alpha-2/delta-2 (Voltage-gated calcium channel subunit alpha-2/delta-2) [Cleaved into: Voltage-dependent calcium channel subunit alpha-2-2; Voltage-dependent calcium channel subunit delta-2]
Q8N126	CADM3 IGSF4B NECL1 SYNCAM3 TSLL1 UNQ225/PRO258	Cell adhesion molecule 3 (Brain immunoglobulin receptor) (Immunoglobulin superfamily member 4B) (IgSF4B) (Nectin-like protein 1) (NECL-1) (Synaptic cell adhesion molecule 3) (SynCAM3) (TSLC1-like protein 1) (TSLL1)
O43852	CALU	Calumenin (Crocalbin) (IEF SSP 9302)
P63098	PPP3R1 CNA2 CNB	Calcineurin subunit B type 1 (Protein phosphatase 2B regulatory subunit 1) (Protein phosphatase 3 regulatory subunit B alpha isoform 1)
Q9P0X4	CACNA1I KIAA1120	Voltage-dependent T-type calcium channel subunit alpha-1I (Voltage-gated calcium channel subunit alpha Cav3.3) (Ca(v)3.3)
Q86YS7	C2CD5 CDP138 KIAA0528	C2 domain-containing protein 5 (C2 domain-containing phosphoprotein of 138 kDa)
Q8WWF8	CAPSL	Calcyphosin-like protein
O75952	CABYR CBP86 FSP2	Calcium-binding tyrosine phosphorylation-regulated protein (Calcium-binding protein 86) (Cancer/testis antigen 88) (CT88) (Fibrousheathin II) (Fibrousheathin-2) (FSP-2) (Testis-specific calcium-binding protein CBP86)
O60840	CACNA1F CACNAF1	Voltage-dependent L-type calcium channel subunit alpha-1F (Voltage-gated calcium channel subunit alpha Cav1.4)
Q13938	CAPS	Calcyphosin (Calcyphosine)
Q8TD86	CALML6 CAGLP CALGP	Calmodulin-like protein 6 (Calglandulin-like protein)
P0DP23	CALM1 CALM CAM CAM1	Calmodulin-1
P0DP24	CALM2 CAM2 CAMB	Calmodulin-2
P0DP25	CALM3 CALML2 CAM3 CAMC CAMIII	Calmodulin-3
O95180	CACNA1H	Voltage-dependent T-type calcium channel subunit alpha-1H (Low-voltage-activated calcium channel alpha1 3.2 subunit) (Voltage-gated calcium channel subunit alpha Cav3.2)
P22676	CALB2 CAB29	Calretinin (CR) (29 kDa calbindin)
Q6P2M8	PNCK	Calcium/calmodulin-dependent protein kinase type 1B (EC 2.7.11.17) (CaM kinase I beta) (CaM kinase IB) (CaM-KI beta) (CaMKI-beta) (Pregnancy up-regulated non-ubiquitously-expressed CaM kinase)
P56199	ITGA1	Integrin alpha-1 (CD49 antigen-like family member A) (Laminin and collagen receptor) (VLA-1) (CD antigen CD49a)
P17301	ITGA2 CD49B	Integrin alpha-2 (CD49 antigen-like family member B) (Collagen receptor) (Platelet membrane glycoprotein Ia) (GPIa) (VLA-2 subunit alpha) (CD antigen CD49b)
Q6PIL6	KCNIP4 CALP KCHIP4	Kv channel-interacting protein 4 (KChIP4) (A-type potassium channel modulatory protein 4) (Calsenilin-like protein) (Potassium channel-interacting protein 4)
Q9NZI2	KCNIP1 KCHIP1 VABP	Kv channel-interacting protein 1 (KChIP1) (A-type potassium channel modulatory protein 1) (Potassium channel-interacting protein 1) (Vesicle APC-binding protein)
Q5JUK3	KCNT1 KIAA1422	Potassium channel subfamily T member 1 (KCa4.1)
P26006	ITGA3 MSK18	Integrin alpha-3 (CD49 antigen-like family member C) (FRP-2) (Galactoprotein B3) (GAPB3) (VLA-3 subunit alpha) (CD antigen CD49c) [Cleaved into: Integrin alpha-3 heavy chain; Integrin alpha-3 light chain]
P53708	ITGA8	Integrin alpha-8 [Cleaved into: Integrin alpha-8 heavy chain; Integrin alpha-8 light chain]
Q9NZM3	ITSN2 KIAA1256 SH3D1B SWAP	Intersectin-2 (SH3 domain-containing protein 1B) (SH3P18) (SH3P18-like WASP-associated protein)
Q14571	ITPR2	Inositol 1,4,5-trisphosphate receptor type 2 (IP3 receptor isoform 2) (IP3R 2) (InsP3R2) (Type 2 inositol 1,4,5-trisphosphate receptor) (Type 2 InsP3 receptor)
P00709	LALBA LYZL7	Alpha-lactalbumin (Lactose synthase B protein) (Lysozyme-like protein 7)
P05129	PRKCG PKCG	Protein kinase C gamma type (PKC-gamma) (EC 2.7.11.13)
P05771	PRKCB PKCB PRKCB1	Protein kinase C beta type (PKC-B) (PKC-beta) (EC 2.7.11.13)
Q8NDA2	HMCN2	Hemicentin-2
Q9ULI3	HEG1 KIAA1237	Protein HEG homolog 1
P20702	ITGAX CD11C	Integrin alpha-X (CD11 antigen-like family member C) (Leu M5) (Leukocyte adhesion glycoprotein p150,95 alpha chain) (Leukocyte adhesion receptor p150,95) (CD antigen CD11c)
Q9NS61	KCNIP2 KCHIP2	Kv channel-interacting protein 2 (KChIP2) (A-type potassium channel modulatory protein 2) (Cardiac voltage-gated potassium channel modulatory subunit) (Potassium channel-interacting protein 2)
P08648	ITGA5 FNRA	Integrin alpha-5 (CD49 antigen-like family member E) (Fibronectin receptor subunit alpha) (Integrin alpha-F) (VLA-5) (CD antigen CD49e) [Cleaved into: Integrin alpha-5 heavy chain; Integrin alpha-5 light chain]
Q13683	ITGA7 UNQ406/PRO768	Integrin alpha-7 [Cleaved into: Integrin alpha-7 heavy chain; Integrin alpha-7 light chain; Integrin alpha-7 70 kDa form]
Q13349	ITGAD	Integrin alpha-D (ADB2) (CD11 antigen-like family member D) (Leukointegrin alpha D) (CD antigen CD11d)
Q14643	ITPR1 INSP3R1	Inositol 1,4,5-trisphosphate receptor type 1 (IP3 receptor isoform 1) (IP3R 1) (InsP3R1) (Type 1 inositol 1,4,5-trisphosphate receptor) (Type 1 InsP3 receptor)
P78504	JAG1 JAGL1	Protein jagged-1 (Jagged1) (hJ1) (CD antigen CD339)
Q15811	ITSN1 ITSN SH3D1A	Intersectin-1 (SH3 domain-containing protein 1A) (SH3P17)
P38570	ITGAE	Integrin alpha-E (HML-1 antigen) (Integrin alpha-IEL) (Mucosal lymphocyte 1 antigen) (CD antigen CD103) [Cleaved into: Integrin alpha-E light chain; Integrin alpha-E heavy chain]
P08514	ITGA2B GP2B ITGAB	Integrin alpha-IIb (GPalpha IIb) (GPIIb) (Platelet membrane glycoprotein IIb) (CD antigen CD41) [Cleaved into: Integrin alpha-IIb heavy chain; Integrin alpha-IIb light chain, form 1; Integrin alpha-IIb light chain, form 2]
O75578	ITGA10 UNQ468/PRO827	Integrin alpha-10
P20701	ITGAL CD11A	Integrin alpha-L (CD11 antigen-like family member A) (Leukocyte adhesion glycoprotein LFA-1 alpha chain) (LFA-1A) (Leukocyte function-associated molecule 1 alpha chain) (CD antigen CD11a)
P11215	ITGAM CD11B CR3A	Integrin alpha-M (CD11 antigen-like family member B) (CR-3 alpha chain) (Cell surface glycoprotein MAC-1 subunit alpha) (Leukocyte adhesion receptor MO1) (Neutrophil adherence receptor) (CD antigen CD11b)
P06756	ITGAV MSK8 VNRA VTNR	Integrin alpha-V (Vitronectin receptor) (Vitronectin receptor subunit alpha) (CD antigen CD51) [Cleaved into: Integrin alpha-V heavy chain; Integrin alpha-V light chain]
Q96RW7	HMCN1 FIBL6	Hemicentin-1 (Fibulin-6) (FIBL-6)
P43080	GUCA1A C6orf131 GCAP GCAP1 GUCA1	Guanylyl cyclase-activating protein 1 (GCAP 1) (Guanylate cyclase activator 1A)
P37235	HPCAL1 BDR1	Hippocalcin-like protein 1 (Calcium-binding protein BDR-1) (HLP2) (Visinin-like protein 3) (VILIP-3)
Q9Y547	HSPB11 C1orf41 IFT25 HSPC034	Intraflagellar transport protein 25 homolog (Heat shock protein beta-11) (Hspb11) (Placental protein 25) (PP25)
P35442	THBS2 TSP2	Thrombospondin-2
P63316	TNNC1 TNNC	Troponin C, slow skeletal and cardiac muscles (TN-C)
Q9BX84	TRPM6 CHAK2	Transient receptor potential cation channel subfamily M member 6 (EC 2.7.11.1) (Channel kinase 2) (Melastatin-related TRP cation channel 6)
P07996	THBS1 TSP TSP1	Thrombospondin-1 (Glycoprotein G)
P07478	PRSS2 TRY2 TRYP2	Trypsin-2 (EC 3.4.21.4) (Anionic trypsinogen) (Serine protease 2) (Trypsin II)
Q8NET8	TRPV3	Transient receptor potential cation channel subfamily V member 3 (TrpV3) (Vanilloid receptor-like 3) (VRL-3)
Q9UBN4	TRPC4	Short transient receptor potential channel 4 (TrpC4) (Trp-related protein 4) (hTrp-4) (hTrp4)
P35443	THBS4 TSP4	Thrombospondin-4
Q9HCF6	TRPM3 KIAA1616 LTRPC3	Transient receptor potential cation channel subfamily M member 3 (Long transient receptor potential channel 3) (LTrpC-3) (LTrpC3) (Melastatin-2) (MLSN2)
Q9ULQ1	TPCN1 KIAA1169 TPC1	Two pore calcium channel protein 1 (Voltage-dependent calcium channel protein TPC1)
Q07283	TCHH THH THL TRHY	Trichohyalin
P02585	TNNC2	Troponin C, skeletal muscle
Q9HBA0	TRPV4 VRL2 VROAC	Transient receptor potential cation channel subfamily V member 4 (TrpV4) (Osm-9-like TRP channel 4) (OTRPC4) (Transient receptor potential protein 12) (TRP12) (Vanilloid receptor-like channel 2) (Vanilloid receptor-like protein 2) (VRL-2) (Vanilloid receptor-related osmotically-activated channel) (VR-OAC)
P49746	THBS3 TSP3	Thrombospondin-3
Q96DN2	VWCE URG11	von Willebrand factor C and EGF domain-containing protein (HBV X protein up-regulated gene 11 protein) (HBxAg up-regulated gene 11 protein)
O15195	VILL	Villin-like protein
P09327	VIL1 VIL	Villin-1
Q9UL62	TRPC5 TRP5	Short transient receptor potential channel 5 (TrpC5) (Transient receptor protein 5) (TRP-5) (hTRP-5) (hTRP5)
Q13507	TRPC3 TRP3	Short transient receptor potential channel 3 (TrpC3) (Transient receptor protein 3) (TRP-3) (hTrp-3) (hTrp3)
Q8WZ42	TTN	Titin (EC 2.7.11.1) (Connectin) (Rhabdomyosarcoma antigen MU-RMS-40.14)
P00734	F2	Prothrombin (EC 3.4.21.5) (Coagulation factor II) [Cleaved into: Activation peptide fragment 1; Activation peptide fragment 2; Thrombin light chain; Thrombin heavy chain]
O43897	TLL1 TLL	Tolloid-like protein 1 (EC 3.4.24.-)
Q9Y6L7	TLL2 KIAA0932	Tolloid-like protein 2 (EC 3.4.24.-)
P06396	GSN	Gelsolin (AGEL) (Actin-depolymerizing factor) (ADF) (Brevin)
P00740	F9	Coagulation factor IX (EC 3.4.21.22) (Christmas factor) (Plasma thromboplastin component) (PTC) [Cleaved into: Coagulation factor IXa light chain; Coagulation factor IXa heavy chain]
Q8IV61	RASGRP3 GRP3 KIAA0846	Ras guanyl-releasing protein 3 (Calcium and DAG-regulated guanine nucleotide exchange factor III) (Guanine nucleotide exchange factor for Rap1)
P00451	F8 F8C	Coagulation factor VIII (Antihemophilic factor) (AHF) (Procoagulant component) [Cleaved into: Factor VIIIa heavy chain, 200 kDa isoform; Factor VIIIa heavy chain, 92 kDa isoform; Factor VIII B chain; Factor VIIIa light chain]
P14625	HSP90B1 GRP94 TRA1	Endoplasmin (94 kDa glucose-regulated protein) (GRP-94) (Heat shock protein 90 kDa beta member 1) (Tumor rejection antigen 1) (gp96 homolog)
Q8N7U6	EFHB	EF-hand domain-containing family member B
O95267	RASGRP1 RASGRP	RAS guanyl-releasing protein 1 (Calcium and DAG-regulated guanine nucleotide exchange factor II) (CalDAG-GEFII) (Ras guanyl-releasing protein)
Q8TDF6	RASGRP4	RAS guanyl-releasing protein 4
P98095	FBLN2	Fibulin-2 (FIBL-2)
Q9Y680	FKBP7 FKBP23 UNQ670/PRO1304	Peptidyl-prolyl cis-trans isomerase FKBP7 (PPIase FKBP7) (EC 5.2.1.8) (23 kDa FK506-binding protein) (23 kDa FKBP) (FKBP-23) (FK506-binding protein 7) (FKBP-7) (Rotamase)
O95967	EFEMP2 FBLN4 UNQ200/PRO226	EGF-containing fibulin-like extracellular matrix protein 2 (Fibulin-4) (FIBL-4) (Protein UPH1)
Q9NWM8	FKBP14 FKBP22 UNQ322/PRO381	Peptidyl-prolyl cis-trans isomerase FKBP14 (PPIase FKBP14) (EC 5.2.1.8) (22 kDa FK506-binding protein) (22 kDa FKBP) (FKBP-22) (FK506-binding protein 14) (FKBP-14) (Rotamase)
P35555	FBN1 FBN	Fibrillin-1 [Cleaved into: Asprosin]
Q12805	EFEMP1 FBLN3 FBNL	EGF-containing fibulin-like extracellular matrix protein 1 (Extracellular protein S1-5) (Fibrillin-like protein) (Fibulin-3) (FIBL-3)
Q15485	FCN2 FCNL	Ficolin-2 (37 kDa elastin-binding protein) (Collagen/fibrinogen domain-containing protein 2) (EBP-37) (Ficolin-B) (Ficolin-beta) (Hucolin) (L-ficolin) (Serum lectin p35)
P08709	F7	Coagulation factor VII (EC 3.4.21.21) (Proconvertin) (Serum prothrombin conversion accelerator) (SPCA) (Eptacog alfa) [Cleaved into: Factor VII light chain; Factor VII heavy chain]
P12259	F5	Coagulation factor V (Activated protein C cofactor) (Proaccelerin, labile factor) [Cleaved into: Coagulation factor V heavy chain; Coagulation factor V light chain]
Q75N90	FBN3 KIAA1776	Fibrillin-3 [Cleaved into: Fibrillin-3 C-terminal peptide]
P23142	FBLN1 PP213	Fibulin-1 (FIBL-1)
P23743	DGKA DAGK DAGK1	Diacylglycerol kinase alpha (DAG kinase alpha) (EC 2.7.1.107) (80 kDa diacylglycerol kinase) (Diglyceride kinase alpha) (DGK-alpha)
Q9Y6T7	DGKB DAGK2 KIAA0718	Diacylglycerol kinase beta (DAG kinase beta) (EC 2.7.1.107) (90 kDa diacylglycerol kinase) (Diglyceride kinase beta) (DGK-beta)
Q14184	DOC2B DOC2BL	Double C2-like domain-containing protein beta (Doc2-beta)
Q8IUX8	EGFL6 MAEG PP648 UNQ281/PRO320	Epidermal growth factor-like protein 6 (EGF-like protein 6) (MAM and EGF domains-containing gene protein)
Q14318	FKBP8 FKBP38	Peptidyl-prolyl cis-trans isomerase FKBP8 (PPIase FKBP8) (EC 5.2.1.8) (38 kDa FK506-binding protein) (38 kDa FKBP) (FKBP-38) (hFKBP38) (FK506-binding protein 8) (FKBP-8) (FKBPR38) (Rotamase)
P54315	PNLIPRP1 PLRP1	Inactive pancreatic lipase-related protein 1 (PL-RP1)
P17252	PRKCA PKCA PRKACA	Protein kinase C alpha type (PKC-A) (PKC-alpha) (EC 2.7.11.13)
Q9NZR2	LRP1B LRPDIT	Low-density lipoprotein receptor-related protein 1B (LRP-1B) (Low-density lipoprotein receptor-related protein-deleted in tumor) (LRP-DIT)
O00187	MASP2	Mannan-binding lectin serine protease 2 (EC 3.4.21.104) (MBL-associated serine protease 2) (Mannose-binding protein-associated serine protease 2) (MASP-2) [Cleaved into: Mannan-binding lectin serine protease 2 A chain; Mannan-binding lectin serine protease 2 B chain]
Q6DN12	MCTP2	Multiple C2 and transmembrane domain-containing protein 2
P98164	LRP2	Low-density lipoprotein receptor-related protein 2 (LRP-2) (Glycoprotein 330) (gp330) (Megalin)
Q9UPN3	MACF1 ABP620 ACF7 KIAA0465 KIAA1251	Microtubule-actin cross-linking factor 1, isoforms 1/2/3/5 (620 kDa actin-binding protein) (ABP620) (Actin cross-linking family protein 7) (Macrophin-1) (Trabeculin-alpha)
P09917	ALOX5 LOG5	Arachidonate 5-lipoxygenase (5-LO) (5-lipoxygenase) (EC 1.13.11.34)
P11226	MBL2 COLEC1 MBL	Mannose-binding protein C (MBP-C) (Collectin-1) (MBP1) (Mannan-binding protein) (Mannose-binding lectin)
Q8NFF2	SLC24A4 NCKX4	Sodium/potassium/calcium exchanger 4 (Na(+)/K(+)/Ca(2+)-exchange protein 4) (Solute carrier family 24 member 4)
O14594	NCAN CSPG3 NEUR	Neurocan core protein (Chondroitin sulfate proteoglycan 3)
Q71RS6	SLC24A5 JSX NCKX5	Sodium/potassium/calcium exchanger 5 (Na(+)/K(+)/Ca(2+)-exchange protein 5) (Solute carrier family 24 member 5)
P61601	NCALD	Neurocalcin-delta
Q9UI40	SLC24A2 NCKX2	Sodium/potassium/calcium exchanger 2 (Na(+)/K(+)/Ca(2+)-exchange protein 2) (Retinal cone Na-Ca+K exchanger) (Solute carrier family 24 member 2)
P14222	PRF1 PFP	Perforin-1 (P1) (Cytolysin) (Lymphocyte pore-forming protein) (PFP)
Q7Z7M0	MEGF8 C19orf49 EGFL4 KIAA0817	Multiple epidermal growth factor-like domains protein 8 (Multiple EGF-like domains protein 8) (Epidermal growth factor-like protein 4) (EGF-like protein 4)
P19105	MYL12A MLCB MRLC3 RLC	Myosin regulatory light chain 12A (Epididymis secretory protein Li 24) (HEL-S-24) (MLC-2B) (Myosin RLC) (Myosin regulatory light chain 2, nonsarcomeric) (Myosin regulatory light chain MRLC3)
Q86XE3	MICU3 EFHA2	Calcium uptake protein 3, mitochondrial (EF-hand domain-containing family member A2)
Q14680	MELK KIAA0175	Maternal embryonic leucine zipper kinase (hMELK) (EC 2.7.11.1) (Protein kinase Eg3) (pEg3 kinase) (Protein kinase PK38) (hPK38) (Tyrosine-protein kinase MELK) (EC 2.7.10.2)
P48740	MASP1 CRARF CRARF1 PRSS5	Mannan-binding lectin serine protease 1 (EC 3.4.21.-) (Complement factor MASP-3) (Complement-activating component of Ra-reactive factor) (Mannose-binding lectin-associated serine protease 1) (MASP-1) (Mannose-binding protein-associated serine protease) (Ra-reactive factor serine protease p100) (RaRF) (Serine protease 5) [Cleaved into: Mannan-binding lectin serine protease 1 heavy chain; Mannan-bi…
P16109	SELP GMRP GRMP	P-selectin (CD62 antigen-like family member P) (Granule membrane protein 140) (GMP-140) (Leukocyte-endothelial cell adhesion molecule 3) (LECAM3) (Platelet activation dependent granule-external membrane protein) (PADGEM) (CD antigen CD62P)
Q6DN14	MCTP1	Multiple C2 and transmembrane domain-containing protein 1
O75096	LRP4 KIAA0816 LRP10 MEGF7	Low-density lipoprotein receptor-related protein 4 (LRP-4) (Multiple epidermal growth factor-like domains 7)
Q07954	LRP1 A2MR APR	Prolow-density lipoprotein receptor-related protein 1 (LRP-1) (Alpha-2-macroglobulin receptor) (A2MR) (Apolipoprotein E receptor) (APOER) (CD antigen CD91) [Cleaved into: Low-density lipoprotein receptor-related protein 1 85 kDa subunit (LRP-85); Low-density lipoprotein receptor-related protein 1 515 kDa subunit (LRP-515); Low-density lipoprotein receptor-related protein 1 intracellular domain (L…
A8MV57	MPTX1 MPTX	Putative mucosal pentraxin homolog
P62166	NCS1 FLUP FREQ	Neuronal calcium sensor 1 (NCS-1) (Frequenin homolog) (Frequenin-like protein) (Frequenin-like ubiquitous protein)
Q8NBK3	SUMF1 PSEC0152 UNQ3037/PRO9852	Formylglycine-generating enzyme (FGE) (EC 1.8.3.7) (C-alpha-formylglycine-generating enzyme 1) (Sulfatase-modifying factor 1)
P31949	S100A11 MLN70 S100C	Protein S100-A11 (Calgizzarin) (Metastatic lymph node gene 70 protein) (MLN 70) (Protein S100-C) (S100 calcium-binding protein A11) [Cleaved into: Protein S100-A11, N-terminally processed]
P20472	PVALB	Parvalbumin alpha
Q8IX30	SCUBE3 CEGF3	Signal peptide, CUB and EGF-like domain-containing protein 3
P29377	S100G CABP9K CALB3 S100D	Protein S100-G (Calbindin-D9k) (S100 calcium-binding protein G) (Vitamin D-dependent calcium-binding protein, intestinal) (CABP)
P02743	APCS PTX2	Serum amyloid P-component (SAP) (9.5S alpha-1-glycoprotein) [Cleaved into: Serum amyloid P-component(1-203)]
Q6UXI9	NPNT EGFL6L POEM UNQ295/PRO334	Nephronectin (Preosteoblast EGF-like repeat protein with MAM domain) (Protein EGFL6-like)
Q92832	NELL1 NRP1	Protein kinase C-binding protein NELL1 (NEL-like protein 1) (Nel-related protein 1)
P29474	NOS3	Nitric oxide synthase, endothelial (EC 1.14.13.39) (Constitutive NOS) (cNOS) (EC-NOS) (Endothelial NOS) (eNOS) (NOS type III) (NOSIII)
P35228	NOS2 NOS2A	Nitric oxide synthase, inducible (EC 1.14.13.39) (Hepatocyte NOS) (HEP-NOS) (Inducible NO synthase) (Inducible NOS) (iNOS) (NOS type II) (Peptidyl-cysteine S-nitrosylase NOS2)
O14786	NRP1 NRP VEGF165R	Neuropilin-1 (Vascular endothelial cell growth factor 165 receptor) (CD antigen CD304)
P16112	ACAN AGC1 CSPG1 MSK16	Aggrecan core protein (Cartilage-specific proteoglycan core protein) (CSPCP) (Chondroitin sulfate proteoglycan core protein 1) (Chondroitin sulfate proteoglycan 1) [Cleaved into: Aggrecan core protein 2]
Q86XX4	FRAS1 KIAA1500	Extracellular matrix protein FRAS1
Q53RD9	FBLN7 TM14	Fibulin-7 (FIBL-7)
P35556	FBN2	Fibrillin-2 [Cleaved into: Fibrillin-2 C-terminal peptide]
Q08345	DDR1 CAK EDDR1 NEP NTRK4 PTK3A RTK6 TRKE	Epithelial discoidin domain-containing receptor 1 (Epithelial discoidin domain receptor 1) (EC 2.7.10.1) (CD167 antigen-like family member A) (Cell adhesion kinase) (Discoidin receptor tyrosine kinase) (HGK2) (Mammary carcinoma kinase 10) (MCK-10) (Protein-tyrosine kinase 3A) (Protein-tyrosine kinase RTK-6) (TRK E) (Tyrosine kinase DDR) (Tyrosine-protein kinase CAK) (CD antigen CD167a)
Q93084	ATP2A3	Sarcoplasmic/endoplasmic reticulum calcium ATPase 3 (SERCA3) (SR Ca(2+)-ATPase 3) (EC 3.6.3.8) (Calcium pump 3)
P98194	ATP2C1 KIAA1347 PMR1L HUSSY-28	Calcium-transporting ATPase type 2C member 1 (ATPase 2C1) (EC 3.6.3.8) (ATP-dependent Ca(2+) pump PMR1)
Q5KU26	COLEC12 CLP1 NSR2 SCARA4 SRCL	Collectin-12 (Collectin placenta protein 1) (CL-P1) (hCL-P1) (Nurse cell scavenger receptor 2) (Scavenger receptor class A member 4) (Scavenger receptor with C-type lectin)
Q9Y2W7	KCNIP3 CSEN DREAM KCHIP3	Calsenilin (A-type potassium channel modulatory protein 3) (DRE-antagonist modulator) (DREAM) (Kv channel-interacting protein 3) (KChIP3)
Q9NRD8	DUOX2 LNOX2 THOX2	Dual oxidase 2 (EC 1.11.1.-) (EC 1.6.3.1) (Large NOX 2) (Long NOX 2) (NADH/NADPH thyroid oxidase p138-tox) (NADPH oxidase/peroxidase DUOX2) (NADPH thyroid oxidase 2) (Thyroid oxidase 2) (p138 thyroid oxidase)
Q96P56	CATSPER2	Cation channel sperm-associated protein 2 (CatSper2)
Q6UXH1	CRELD2 UNQ185/PRO211	Cysteine-rich with EGF-like domain protein 2
P13611	VCAN CSPG2	Versican core protein (Chondroitin sulfate proteoglycan core protein 2) (Chondroitin sulfate proteoglycan 2) (Glial hyaluronate-binding protein) (GHAP) (Large fibroblast proteoglycan) (PG-M)
P05997	COL5A2	Collagen alpha-2(V) chain
Q96L46	CAPNS2	Calpain small subunit 2 (CSS2) (Calcium-dependent protease small subunit 2)
P14543	NID1 NID	Nidogen-1 (NID-1) (Entactin)
Q14112	NID2	Nidogen-2 (NID-2) (Osteonidogen)
P07202	TPO	Thyroid peroxidase (TPO) (EC 1.11.1.8)
Q9P212	PLCE1 KIAA1516 PLCE PPLC	1-phosphatidylinositol 4,5-bisphosphate phosphodiesterase epsilon-1 (EC 3.1.4.11) (Pancreas-enriched phospholipase C) (Phosphoinositide phospholipase C-epsilon-1) (Phospholipase C-epsilon-1) (PLC-epsilon-1)
O75038	PLCH2 KIAA0450 PLCL4	1-phosphatidylinositol 4,5-bisphosphate phosphodiesterase eta-2 (EC 3.1.4.11) (Phosphoinositide phospholipase C-eta-2) (Phosphoinositide phospholipase C-like 4) (PLC-L4) (Phospholipase C-like protein 4) (Phospholipase C-eta-2) (PLC-eta2)
Q9BRC7	PLCD4	1-phosphatidylinositol 4,5-bisphosphate phosphodiesterase delta-4 (hPLCD4) (EC 3.1.4.11) (Phosphoinositide phospholipase C-delta-4) (Phospholipase C-delta-4) (PLC-delta-4)
Q9Y6V0	PCLO ACZ KIAA0559	Protein piccolo (Aczonin)
Q15746	MYLK MLCK MLCK1 MYLK1	Myosin light chain kinase, smooth muscle (MLCK) (smMLCK) (EC 2.7.11.18) (Kinase-related protein) (KRP) (Telokin) [Cleaved into: Myosin light chain kinase, smooth muscle, deglutamylated form]
P0C869	PLA2G4B	Cytosolic phospholipase A2 beta (cPLA2-beta) (EC 3.1.1.4) (Phospholipase A2 group IVB)
P04054	PLA2G1B PLA2 PLA2A PPLA2	Phospholipase A2 (EC 3.1.1.4) (Group IB phospholipase A2) (Phosphatidylcholine 2-acylhydrolase 1B)
Q7RTY7	OVCH1	Ovochymase-1 (EC 3.4.21.-)
Q7RTZ1	OVCH2 OVTN	Ovochymase-2 (EC 3.4.21.-) (Oviductin)
Q86XP0	PLA2G4D	Cytosolic phospholipase A2 delta (cPLA2-delta) (EC 3.1.1.4) (Phospholipase A2 group IVD)
P0CE72	OCM OCM1 OCMN	Oncomodulin-1 (OM) (Parvalbumin beta)
Q5R387	PLA2G2C	Putative inactive group IIC secretory phospholipase A2 (Phosphatidylcholine 2-acylhydrolase-like protein GIIC)
Q9UNK4	PLA2G2D SPLASH	Group IID secretory phospholipase A2 (GIID sPLA2) (sPLA2-IID) (EC 3.1.1.4) (PLA2IID) (Phosphatidylcholine 2-acylhydrolase 2D) (Secretory-type PLA, stroma-associated homolog)
Q9HC10	OTOF FER1L2	Otoferlin (Fer-1-like protein 2)
Q9BZM2	PLA2G2F	Group IIF secretory phospholipase A2 (GIIF sPLA2) (sPLA2-IIF) (EC 3.1.1.4) (Phosphatidylcholine 2-acylhydrolase 2F)
Q9NXG6	P4HTM PH4	Transmembrane prolyl 4-hydroxylase (P4H-TM) (EC 1.14.11.-) (Hypoxia-inducible factor prolyl hydroxylase 4) (HIF-PH4) (HIF-prolyl hydroxylase 4) (HPH-4)
P47712	PLA2G4A CPLA2 PLA2G4	Cytosolic phospholipase A2 (cPLA2) (Phospholipase A2 group IVA) [Includes: Phospholipase A2 (EC 3.1.1.4) (Phosphatidylcholine 2-acylhydrolase); Lysophospholipase (EC 3.1.1.5)]
P39877	PLA2G5	Calcium-dependent phospholipase A2 (EC 3.1.1.4) (Group V phospholipase A2) (PLA2-10) (Phosphatidylcholine 2-acylhydrolase 5)
P16885	PLCG2	1-phosphatidylinositol 4,5-bisphosphate phosphodiesterase gamma-2 (EC 3.1.4.11) (Phosphoinositide phospholipase C-gamma-2) (Phospholipase C-IV) (PLC-IV) (Phospholipase C-gamma-2) (PLC-gamma-2)
P19174	PLCG1 PLC1	1-phosphatidylinositol 4,5-bisphosphate phosphodiesterase gamma-1 (EC 3.1.4.11) (PLC-148) (Phosphoinositide phospholipase C-gamma-1) (Phospholipase C-II) (PLC-II) (Phospholipase C-gamma-1) (PLC-gamma-1)
Q8N3E9	PLCD3 KIAA1964	1-phosphatidylinositol 4,5-bisphosphate phosphodiesterase delta-3 (EC 3.1.4.11) (Phosphoinositide phospholipase C-delta-3) (Phospholipase C-delta-3) (PLC-delta-3)
Q14651	PLS1	Plastin-1 (Intestine-specific plastin) (I-plastin)
P13796	LCP1 PLS2	Plastin-2 (L-plastin) (LC64P) (Lymphocyte cytosolic protein 1) (LCP-1)
P80303	NUCB2 NEFA	Nucleobindin-2 (DNA-binding protein NEFA) (Epididymis secretory protein Li 109) (Gastric cancer antigen Zg4) (Prepronesfatin) [Cleaved into: Nesfatin-1]
P04070	PROC	Vitamin K-dependent protein C (EC 3.4.21.69) (Anticoagulant protein C) (Autoprothrombin IIA) (Blood coagulation factor XIV) [Cleaved into: Vitamin K-dependent protein C light chain; Vitamin K-dependent protein C heavy chain; Activation peptide]
P22891	PROZ	Vitamin K-dependent protein Z
Q9UGM1	CHRNA9 NACHRA9	Neuronal acetylcholine receptor subunit alpha-9 (Nicotinic acetylcholine receptor subunit alpha-9) (NACHR alpha-9)
Q14246	ADGRE1 EMR1 TM7LN3	Adhesion G protein-coupled receptor E1 (EGF-like module receptor 1) (EGF-like module-containing mucin-like hormone receptor-like 1) (EMR1 hormone receptor)
P12814	ACTN1	Alpha-actinin-1 (Alpha-actinin cytoskeletal isoform) (F-actin cross-linking protein) (Non-muscle alpha-actinin-1)
O00468	AGRN AGRIN	Agrin [Cleaved into: Agrin N-terminal 110 kDa subunit; Agrin C-terminal 110 kDa subunit; Agrin C-terminal 90 kDa fragment (C90); Agrin C-terminal 22 kDa fragment (C22)]
Q9HBW9	ADGRL4 ELTD1 ETL UNQ202/PRO228	Adhesion G protein-coupled receptor L4 (EGF, latrophilin and seven transmembrane domain-containing protein 1) (EGF-TM7-latrophilin-related protein) (ETL protein)
P04746	AMY2A	Pancreatic alpha-amylase (PA) (EC 3.2.1.1) (1,4-alpha-D-glucan glucanohydrolase)
Q9BY15	ADGRE3 EMR3 UNQ683/PRO1562	Adhesion G protein-coupled receptor E3 (EGF-like module receptor 3) (EGF-like module-containing mucin-like hormone receptor-like 3)
P04745	AMY1A AMY1; AMY1B AMY1; AMY1C AMY1	Alpha-amylase 1 (EC 3.2.1.1) (1,4-alpha-D-glucan glucanohydrolase 1) (Salivary alpha-amylase)
Q9UHX3	ADGRE2 EMR2	Adhesion G protein-coupled receptor E2 (EGF-like module receptor 2) (EGF-like module-containing mucin-like hormone receptor-like 2) (CD antigen CD312)
P16615	ATP2A2 ATP2B	Sarcoplasmic/endoplasmic reticulum calcium ATPase 2 (SERCA2) (SR Ca(2+)-ATPase 2) (EC 3.6.3.8) (Calcium pump 2) (Calcium-transporting ATPase sarcoplasmic reticulum type, slow twitch skeletal muscle isoform) (Endoplasmic reticulum class 1/2 Ca(2+) ATPase)
O14983	ATP2A1	Sarcoplasmic/endoplasmic reticulum calcium ATPase 1 (SERCA1) (SR Ca(2+)-ATPase 1) (EC 3.6.3.8) (Calcium pump 1) (Calcium-transporting ATPase sarcoplasmic reticulum type, fast twitch skeletal muscle isoform) (Endoplasmic reticulum class 1/2 Ca(2+) ATPase)
P20020	ATP2B1 PMCA1	Plasma membrane calcium-transporting ATPase 1 (PMCA1) (EC 3.6.3.8) (Plasma membrane calcium ATPase isoform 1) (Plasma membrane calcium pump isoform 1)
Q01814	ATP2B2 PMCA2	Plasma membrane calcium-transporting ATPase 2 (PMCA2) (EC 3.6.3.8) (Plasma membrane calcium ATPase isoform 2) (Plasma membrane calcium pump isoform 2)
Q5T7Y6	S100A1 hCG_15470	Protein S100 (S100 calcium-binding protein)
A0A1B0GUC7	PPP3R2	Calcineurin subunit B type 2
A0A1B0GW24	CABP2	Calcium-binding protein 2
M0R1X8	SLC25A23	Calcium-binding mitochondrial carrier protein SCaMC-3 (Fragment)
E9PDR3	CACNA1B	Voltage-dependent N-type calcium channel subunit alpha
A0A087WTU8	KCNIP1	Kv channel-interacting protein 1
R4GN98	S100A6	Protein S100 (S100 calcium-binding protein) (Fragment)
U3KQI3	PLS3	Plastin-3 (Fragment)
X6RAN8	DUOX2	Dual oxidase 2
A0A0A0MS16	KCNIP1	Kv channel-interacting protein 1
F8W7U0	ITSN1	Intersectin-1
E7ERY9	ATP2B1	Calcium-transporting ATPase (EC 3.6.3.8)
H0YKM0	RASGRP1	RAS guanyl-releasing protein 1
A0A1B0GUN6	CACNA1D	Voltage-dependent L-type calcium channel subunit alpha
A0A0D9SF54	SPTAN1	Spectrin alpha chain, non-erythrocytic 1
A0A087WZT4	PLA2G2D	Phospholipase A(2) (EC 3.1.1.4)
C9JDI3	TNNC1	Troponin C, slow skeletal and cardiac muscles (Fragment)
E5RI78	NCALD	Neurocalcin-delta (Fragment)
H7BZC1	HPCAL1	Hippocalcin-like protein 1 (Fragment)
A0A0G2JRI7	LPCAT1	Lysophosphatidylcholine acyltransferase 1
A3QK37	CAPN8	Calpain-8 (Fragment)
E9PC71	HPCAL1	Hippocalcin-like protein 1
E5RIA5	NCALD	Neurocalcin-delta (Fragment)
Q5JWQ6	NRP1	Neuropilin
F6XEV2	MICU1	Calcium uptake protein 1, mitochondrial
H7BZE4	MYL7	Myosin regulatory light chain 2, atrial isoform (Fragment)
H3BMH1	CAPN3	Calpain-3 (Fragment)
E7ES19	THBS4	Thrombospondin-4
A0A075B7C0	CAPNS1	Calpain small subunit 1 (Fragment)
P47972	NPTX2	Neuronal pentraxin-2 (NP2) (Neuronal pentraxin II) (NP-II)
Q92626	PXDN KIAA0230 MG50 PRG2 VPO VPO1	Peroxidasin homolog (EC 1.11.1.7) (Melanoma-associated antigen MG50) (Vascular peroxidase 1) (p53-responsive gene 2 protein)
Q96A99	PTX4 C16orf38	Pentraxin-4
P98160	HSPG2	Basement membrane-specific heparan sulfate proteoglycan core protein (HSPG) (Perlecan) (PLC) [Cleaved into: Endorepellin; LG3 peptide]
A0A1B0GWK0	PVALEF	Parvalbumin-like EF-hand-containing protein
C9J7T9	TNNC2 hCG_38373	Troponin C type 2 (Fast), isoform CRA_a (Troponin C, skeletal muscle)
A0A087WW63	CACNA1A	Voltage-dependent P/Q-type calcium channel subunit alpha
G3XA98	FBLN5 hCG_21251	Fibulin 5, isoform CRA_a (Fibulin-5)
C9JEG4	MYL7 hCG_18302	Myosin regulatory light chain 2, atrial isoform (Myosin, light polypeptide 7, regulatory)
H0YAN7	MICU3	Calcium uptake protein 3, mitochondrial (Fragment)
H3BN14	CALB2	Calretinin (Fragment)
A0A1C7CYY9	CACNA1A	Voltage-dependent P/Q-type calcium channel subunit alpha
A0A1B0GTW2	CACNA1A	Voltage-dependent P/Q-type calcium channel subunit alpha
D6REJ2	FBN2	Fibrillin-2
D2WEZ3	NOTCH2	Neurogenic locus notch homolog protein 2 (Neurogenic locus notch-like protein 2)
B4E2Q0	ATP2C1 hCG_14809	Calcium-transporting ATPase (EC 3.6.3.8)
A0A087WSV8	NUCB2 hCG_15642	Nucleobindin 2, isoform CRA_b (Nucleobindin-2)
G3V1E2	SDF4 hCG_19193	45 kDa calcium-binding protein (Stromal cell derived factor 4, isoform CRA_a)
H7BXZ6	RHOT1 hCG_1991479	Mitochondrial Rho GTPase (EC 3.6.5.-)
A0A024QZ42	PDCD6 hCG_1985580	HCG1985580, isoform CRA_c (Programmed cell death protein 6)
A0A0A0MTC8	SCUBE2 hCG_23893	Signal peptide, CUB and EGF-like domain-containing protein 2 (Signal peptide, CUB domain, EGF-like 2, isoform CRA_b)
B4DHQ6	SRI	cDNA FLJ54267, moderately similar to Sorcin
Q96HY3	CALM1 CALM2 CALM3 hCG_17033 hCG_20313	CALM1 protein (Calmodulin 2 (Phosphorylase kinase, delta), isoform CRA_a) (Calmodulin 3 (Phosphorylase kinase, delta), isoform CRA_a) (Calmodulin-1) (Calmodulin-3) (LP7057 protein)
B1AH72	PVALB	Parvalbumin alpha
H0Y3U0	PVALB	Parvalbumin alpha (Fragment)
G3XAP6	COMP hCG_37043	Cartilage oligomeric matrix protein, isoform CRA_b
C9JNI2	GUCA1C hCG_26941	Guanylate cyclase activator 1C, isoform CRA_b (Guanylyl cyclase-activating protein 3)
H3BQK9	MACF1	Microtubule-actin cross-linking factor 1, isoforms 1/2/3/5
B5MCD5	DGKB	Diacylglycerol kinase (DAG kinase) (EC 2.7.1.107)
J3KP11	CACNA1E	Voltage-dependent R-type calcium channel subunit alpha
A0A087WVF7	ITSN2	Intersectin-2
G3V226	CALM1	Calmodulin-1
A0A0A0MSP0	ATP2C2	Calcium-transporting ATPase (EC 3.6.3.8)
A0A1B0GTN0	CACNA1D	Voltage-dependent L-type calcium channel subunit alpha
A0A0C4DFQ7	KCNIP1	Kv channel-interacting protein 1
F6RH32	CACNA1B	Voltage-dependent N-type calcium channel subunit alpha
E5RJB7	EFCAB3	EF-hand calcium-binding domain-containing protein 3 (Fragment)
D6RHD7	CAPSL	Calcyphosin-like protein
B1ALM3	CACNA1S	Voltage-dependent L-type calcium channel subunit alpha
C9J7M7	GUCA1C	Guanylyl cyclase-activating protein 3
H0Y827	FKBP10	Peptidylprolyl isomerase (EC 5.2.1.8) (Fragment)
E7ER47	VSNL1	Visinin-like protein 1 (Fragment)
Q5TBN3	LCP1	Plastin-2 (Fragment)
D3YTA9	PPP3R1	Calcineurin subunit B type 1
Q5T7F0	NRP1	Neuropilin
H0Y4F5	MACF1	Microtubule-actin cross-linking factor 1, isoforms 1/2/3/5 (Fragment)
D6RF97	CAPSL	Calcyphosin-like protein (Fragment)
K7EIV0	CAPNS1	Calpain small subunit 1 (Fragment)
H3BPE1	MACF1	Microtubule-actin cross-linking factor 1, isoforms 1/2/3/5
E9PKG6	NUCB2	Nucleobindin-2
H3BUZ3	CAPN3	Calpain-3 (Fragment)
E9PE24	VSNL1	Visinin-like protein 1 (Fragment)
E5RGZ0	NCALD	Neurocalcin-delta (Fragment)
B1AHL2	FBLN1	Fibulin-1
E9PRU1	EFEMP2	EGF-containing fibulin-like extracellular matrix protein 2
A8MXP8	RCN2	Reticulocalbin-2
H3BS77	CAPN3	Calpain-3
H0Y7A7	CALM2	Calmodulin-2 (Fragment)
A0A087WZ38	PDCD6	Programmed cell death protein 6
A0A0A0MTF5	GUCA1A	Guanylyl cyclase-activating protein 1
A0A0C4DGQ5	CAPNS1	Calpain small subunit 1
A0A1B0GUB6	CACNA1D	Voltage-dependent L-type calcium channel subunit alpha
F8W8F5	CAPN3	Calpain-3
G3V361	CALM1	Calmodulin-1 (Fragment)
H7C243	MYL7	Myosin regulatory light chain 2, atrial isoform (Fragment)
A0A0A0MSQ0	PLS3	Plastin-3
F5H4Z8	THBS3	Thrombospondin-3
E5RGA9	NCALD	Neurocalcin-delta
K7ES72	CAPS	Calcyphosin (Fragment)
C9JEA7	PLCD4	Phosphoinositide phospholipase C (EC 3.1.4.11)
F5H638	CACNA1C	Voltage-dependent L-type calcium channel subunit alpha
E9PEP6	NRP1	Neuropilin
A6NFF4	KCNIP2	Kv channel-interacting protein 2
A0A0A0MRH3	KCNIP3	Calsenilin
Q96D15	RCN3 UNQ239/PRO272	Reticulocalbin-3 (EF-hand calcium-binding protein RLP49)
Q14257	RCN2 ERC55	Reticulocalbin-2 (Calcium-binding protein ERC-55) (E6-binding protein) (E6BP)
Q6XPR3	RPTN	Repetin
Q13884	SNTB1 SNT2B1	Beta-1-syntrophin (59 kDa dystrophin-associated protein A1 basic component 1) (DAPA1B) (BSYN2) (Syntrophin-2) (Tax interaction protein 43) (TIP-43)
Q13586	STIM1 GOK	Stromal interaction molecule 1
P02549	SPTA1 SPTA	Spectrin alpha chain, erythrocytic 1 (Erythroid alpha-spectrin)
Q6XYQ8	SYT10	Synaptotagmin-10 (Synaptotagmin X) (SytX)
O00445	SYT5	Synaptotagmin-5 (Synaptotagmin V) (SytV)
Q4LDE5	SVEP1 C9orf13 CCP22 SELOB	Sushi, von Willebrand factor type A, EGF and pentraxin domain-containing protein 1 (CCP module-containing protein 22) (Polydom) (Selectin-like osteoblast-derived protein) (SEL-OB) (Serologically defined breast cancer antigen NY-BR-38)
O43581	SYT7 PCANAP7	Synaptotagmin-7 (IPCA-7) (Prostate cancer-associated protein 7) (Synaptotagmin VII) (SytVII)
Q86SS6	SYT9	Synaptotagmin-9 (Synaptotagmin IX) (SytIX)
P30626	SRI	Sorcin (22 kDa protein) (CP-22) (CP22) (V19)
Q8TER0	SNED1	Sushi, nidogen and EGF-like domain-containing protein 1 (Insulin-responsive sequence DNA-binding protein 1) (IRE-BP1)
Q9BQG1	SYT3	Synaptotagmin-3 (Synaptotagmin III) (SytIII)
Q5T7P8	SYT6	Synaptotagmin-6 (Synaptotagmin VI) (SytVI)
Q9HBX9	RXFP1 LGR7	Relaxin receptor 1 (Leucine-rich repeat-containing G-protein coupled receptor 7) (Relaxin family peptide receptor 1)
P26447	S100A4 CAPL MTS1	Protein S100-A4 (Calvasculin) (Metastasin) (Placental calcium-binding protein) (Protein Mts1) (S100 calcium-binding protein A4)
P33763	S100A5 S100D	Protein S100-A5 (Protein S-100D) (S100 calcium-binding protein A5)
P29034	S100A2 S100L	Protein S100-A2 (CAN19) (Protein S-100L) (S100 calcium-binding protein A2)
Q9BV35	SLC25A23 APC2 MCSC2 SCAMC3	Calcium-binding mitochondrial carrier protein SCaMC-3 (Mitochondrial ATP-Mg/Pi carrier protein 2) (Mitochondrial Ca(2+)-dependent solute carrier protein 2) (Small calcium-binding mitochondrial carrier protein 3) (Solute carrier family 25 member 23)
Q9NQ36	SCUBE2 CEGP1	Signal peptide, CUB and EGF-like domain-containing protein 2 (Protein CEGP1) (Scube/You)
Q6KCM7	SLC25A25 APC3 KIAA1896 MCSC3 SCAMC2 UNQ549/PRO1106	Calcium-binding mitochondrial carrier protein SCaMC-2 (Mitochondrial ATP-Mg/Pi carrier protein 3) (Mitochondrial Ca(2+)-dependent solute carrier protein 3) (Small calcium-binding mitochondrial carrier protein 2) (Solute carrier family 25 member 25)
Q92736	RYR2	Ryanodine receptor 2 (RYR-2) (RyR2) (hRYR-2) (Cardiac muscle ryanodine receptor) (Cardiac muscle ryanodine receptor-calcium release channel) (Type 2 ryanodine receptor)
Q86SG5	S100A7A S100A15 S100A7L1	Protein S100-A7A (S100 calcium-binding protein A15) (S100 calcium-binding protein A7-like 1) (S100 calcium-binding protein A7A)
Q96FQ6	S100A16 S100F AAG13	Protein S100-A16 (Aging-associated gene 13 protein) (Protein S100-F) (S100 calcium-binding protein A16)
Q5SY68	S100A7L2 S100A7B	Protein S100-A7-like 2 (S100 calcium-binding protein A7-like 2)
P05109	S100A8 CAGA CFAG MRP8	Protein S100-A8 (Calgranulin-A) (Calprotectin L1L subunit) (Cystic fibrosis antigen) (CFAG) (Leukocyte L1 complex light chain) (Migration inhibitory factor-related protein 8) (MRP-8) (p8) (S100 calcium-binding protein A8) (Urinary stone protein band A)
O76038	SCGN SECRET	Secretagogin
Q8N9I0	SYT2	Synaptotagmin-2 (Synaptotagmin II) (SytII)
Q9BUD6	SPON2 DIL1 UNQ435/PRO866	Spondin-2 (Differentially expressed in cancerous and non-cancerous lung cells 1) (DIL-1) (Mindin)
P31151	S100A7 PSOR1 S100A7C	Protein S100-A7 (Psoriasin) (S100 calcium-binding protein A7)
P06702	S100A9 CAGB CFAG MRP14	Protein S100-A9 (Calgranulin-B) (Calprotectin L1H subunit) (Leukocyte L1 complex heavy chain) (Migration inhibitory factor-related protein 14) (MRP-14) (p14) (S100 calcium-binding protein A9)
Q99584	S100A13	Protein S100-A13 (S100 calcium-binding protein A13)
Q9BSW2	CRACR2A EFCAB4B	EF-hand calcium-binding domain-containing protein 4B (Calcium release-activated calcium channel regulator 2A) (CRAC channel regulator 2A) (Calcium release-activated channel regulator 2A)
Q9HAE3	EFCAB1	EF-hand calcium-binding domain-containing protein 1
P48960	CD97	CD97 antigen (Leukocyte antigen CD97) (CD antigen CD97) [Cleaved into: CD97 antigen subunit alpha; CD97 antigen subunit beta]
P13942	COL11A2	Collagen alpha-2(XI) chain
A8K7I4	CLCA1 CACC1	Calcium-activated chloride channel regulator 1 (EC 3.4.-.-) (Calcium-activated chloride channel family member 1) (hCLCA1) (Calcium-activated chloride channel protein 1) (CaCC-1) (hCaCC-1)
P12107	COL11A1 COLL6	Collagen alpha-1(XI) chain
Q8IZC6	COL27A1 KIAA1870	Collagen alpha-1(XXVII) chain
O75366	AVIL	Advillin (p92)
Q7RTX7	CATSPER4	Cation channel sperm-associated protein 4 (CatSper4)
Q8NEC5	CATSPER1	Cation channel sperm-associated protein 1 (CatSper1) (hCatSper)
Q96Q77	CIB3 KIP3	Calcium and integrin-binding family member 3 (Kinase-interacting protein 3) (KIP 3)
Q12798	CETN1 CEN1 CETN	Centrin-1 (Caltractin isoform 2)
P41208	CETN2 CALT CEN2	Centrin-2 (Caltractin isoform 1)
Q99653	CHP1 CHP	Calcineurin B homologous protein 1 (Calcineurin B-like protein) (Calcium-binding protein CHP) (Calcium-binding protein p22) (EF-hand calcium-binding domain-containing protein p22)
P07384	CAPN1 CANPL1 PIG30	Calpain-1 catalytic subunit (EC 3.4.22.52) (Calcium-activated neutral proteinase 1) (CANP 1) (Calpain mu-type) (Calpain-1 large subunit) (Cell proliferation-inducing gene 30 protein) (Micromolar-calpain) (muCANP)
Q9NPB3	CABP2	Calcium-binding protein 2 (CaBP2)
Q99674	CGREF1 CGR11	Cell growth regulator with EF hand domain protein 1 (Cell growth regulatory gene 11 protein) (Hydrophobestin)
Q9UNI1	CELA1 ELA1	Chymotrypsin-like elastase family member 1 (EC 3.4.21.36) (Elastase-1) (Pancreatic elastase 1)
Q13936	CACNA1C CACH2 CACN2 CACNL1A1 CCHL1A1	Voltage-dependent L-type calcium channel subunit alpha-1C (Calcium channel, L type, alpha-1 polypeptide, isoform 1, cardiac muscle) (Voltage-gated calcium channel subunit alpha Cav1.2)
Q9ULU8	CADPS CAPS CAPS1 KIAA1121	Calcium-dependent secretion activator 1 (Calcium-dependent activator protein for secretion 1) (CAPS-1)
Q9HCU4	CELSR2 CDHF10 EGFL2 KIAA0279 MEGF3	Cadherin EGF LAG seven-pass G-type receptor 2 (Cadherin family member 10) (Epidermal growth factor-like protein 2) (EGF-like protein 2) (Flamingo homolog 3) (Multiple epidermal growth factor-like domains protein 3) (Multiple EGF-like domains protein 3)
P17655	CAPN2 CANPL2	Calpain-2 catalytic subunit (EC 3.4.22.53) (Calcium-activated neutral proteinase 2) (CANP 2) (Calpain M-type) (Calpain large polypeptide L2) (Calpain-2 large subunit) (Millimolar-calpain) (M-calpain)
O43497	CACNA1G KIAA1123	Voltage-dependent T-type calcium channel subunit alpha-1G (Cav3.1c) (NBR13) (Voltage-gated calcium channel subunit alpha Cav3.1)
Q01668	CACNA1D CACH3 CACN4 CACNL1A2 CCHL1A2	Voltage-dependent L-type calcium channel subunit alpha-1D (Calcium channel, L type, alpha-1 polypeptide, isoform 2) (Voltage-gated calcium channel subunit alpha Cav1.3)
P05937	CALB1 CAB27	Calbindin (Calbindin D28) (D-28K) (Vitamin D-dependent calcium-binding protein, avian-type)
Q00975	CACNA1B CACH5 CACNL1A5	Voltage-dependent N-type calcium channel subunit alpha-1B (Brain calcium channel III) (BIII) (Calcium channel, L type, alpha-1 polypeptide isoform 5) (Voltage-gated calcium channel subunit alpha Cav2.2)
Q13698	CACNA1S CACH1 CACN1 CACNL1A3	Voltage-dependent L-type calcium channel subunit alpha-1S (Calcium channel, L type, alpha-1 polypeptide, isoform 3, skeletal muscle) (Voltage-gated calcium channel subunit alpha Cav1.1)
Q15878	CACNA1E CACH6 CACNL1A6	Voltage-dependent R-type calcium channel subunit alpha-1E (Brain calcium channel II) (BII) (Calcium channel, L type, alpha-1 polypeptide, isoform 6) (Voltage-gated calcium channel subunit alpha Cav2.3)
O00555	CACNA1A CACH4 CACN3 CACNL1A4	Voltage-dependent P/Q-type calcium channel subunit alpha-1A (Brain calcium channel I) (BI) (Calcium channel, L type, alpha-1 polypeptide isoform 4) (Voltage-gated calcium channel subunit alpha Cav2.1)
Q6IMN6	CAPRIN2 C1QDC1 EEG1 KIAA1873 RNG140	Caprin-2 (C1q domain-containing protein 1) (Cytoplasmic activation/proliferation-associated protein 2) (Gastric cancer multidrug resistance-associated protein) (Protein EEG-1) (RNA granule protein 140)
Q13938	CAPS	Calcyphosin (Calcyphosine)
Q86UW7	CADPS2 CAPS2 KIAA1591	Calcium-dependent secretion activator 2 (Calcium-dependent activator protein for secretion 2) (CAPS-2)
Q9BRK5	SDF4 CAB45 PSEC0034	45 kDa calcium-binding protein (Cab45) (Stromal cell-derived factor 4) (SDF-4)
Q9NZU7	CABP1	Calcium-binding protein 1 (CaBP1) (Calbrain) (Caldendrin)
Q9NZT1	CALML5 CLSP	Calmodulin-like protein 5 (Calmodulin-like skin protein)
Q6UXH8	CCBE1 KIAA1983 UNQ1921/PRO4395	Collagen and calcium-binding EGF domain-containing protein 1 (Full of fluid protein homolog)
P09871	C1S	Complement C1s subcomponent (EC 3.4.21.42) (C1 esterase) (Complement component 1 subcomponent s) [Cleaved into: Complement C1s subcomponent heavy chain; Complement C1s subcomponent light chain]
Q9BXU9	CALN1 CABP8	Calcium-binding protein 8 (CaBP8) (Calneuron I) (Calneuron-1)
P54289	CACNA2D1 CACNL2A CCHL2A MHS3	Voltage-dependent calcium channel subunit alpha-2/delta-1 (Voltage-gated calcium channel subunit alpha-2/delta-1) [Cleaved into: Voltage-dependent calcium channel subunit alpha-2-1; Voltage-dependent calcium channel subunit delta-1]
Q86V35	CABP7 CALN2	Calcium-binding protein 7 (CaBP7) (Calneuron II) (Calneuron-2)
Q96LZ3	PPP3R2 CBLP PPP3RL	Calcineurin subunit B type 2 (Calcineurin B-like protein) (CBLP) (Calcineurin BII) (CNBII) (PPP3R1-like) (Protein phosphatase 2B regulatory subunit 2) (Protein phosphatase 3 regulatory subunit B beta isoform)
P27482	CALML3	Calmodulin-like protein 3 (CaM-like protein) (CLP) (Calmodulin-related protein NB-1)
Q8IU85	CAMK1D CAMKID	Calcium/calmodulin-dependent protein kinase type 1D (EC 2.7.11.17) (CaM kinase I delta) (CaM kinase ID) (CaM-KI delta) (CaMKI delta) (CaMKID) (CaMKI-like protein kinase) (CKLiK)
Q12791	KCNMA1 KCNMA SLO	Calcium-activated potassium channel subunit alpha-1 (BK channel) (BKCA alpha) (Calcium-activated potassium channel, subfamily M subunit alpha-1) (K(VCA)alpha) (KCa1.1) (Maxi K channel) (MaxiK) (Slo-alpha) (Slo1) (Slowpoke homolog) (Slo homolog) (hSlo)
Q14573	ITPR3	Inositol 1,4,5-trisphosphate receptor type 3 (IP3 receptor isoform 3) (IP3R 3) (InsP3R3) (Type 3 inositol 1,4,5-trisphosphate receptor) (Type 3 InsP3 receptor)
Q16566	CAMK4 CAMK CAMK-GR CAMKIV	Calcium/calmodulin-dependent protein kinase type IV (CaMK IV) (EC 2.7.11.17) (CaM kinase-GR)
P23229	ITGA6	Integrin alpha-6 (CD49 antigen-like family member F) (VLA-6) (CD antigen CD49f) [Cleaved into: Integrin alpha-6 heavy chain; Integrin alpha-6 light chain; Processed integrin alpha-6 (Alpha6p)]
Q9UMX6	GUCA1B GCAP2	Guanylyl cyclase-activating protein 2 (GCAP 2) (Guanylate cyclase activator 1B)
O95843	GUCA1C GCAP3	Guanylyl cyclase-activating protein 3 (GCAP 3) (Guanylate cyclase activator 1C)
Q9Y219	JAG2	Protein jagged-2 (Jagged2) (hJ2)
Q13797	ITGA9	Integrin alpha-9 (Integrin alpha-RLC)
Q9UKX5	ITGA11 MSTP018	Integrin alpha-11
P13612	ITGA4 CD49D	Integrin alpha-4 (CD49 antigen-like family member D) (Integrin alpha-IV) (VLA-4 subunit alpha) (CD antigen CD49d)
P84074	HPCA BDR2	Neuron-specific calcium-binding protein hippocalcin (Calcium-binding protein BDR-2)
Q9UM19	HPCAL4	Hippocalcin-like protein 4 (HLP4)
Q86YZ3	HRNR S100A18	Hornerin
O60760	HPGDS GSTS PGDS PTGDS2	Hematopoietic prostaglandin D synthase (H-PGDS) (EC 5.3.99.2) (GST class-sigma) (Glutathione S-transferase) (EC 2.5.1.18) (Glutathione-dependent PGD synthase) (Glutathione-requiring prostaglandin D synthase) (Prostaglandin-H2 D-isomerase)
P48995	TRPC1 TRP1	Short transient receptor potential channel 1 (TrpC1) (Transient receptor protein 1) (TRP-1)
Q9NQA5	TRPV5 ECAC1	Transient receptor potential cation channel subfamily V member 5 (TrpV5) (Calcium transport protein 2) (CaT2) (Epithelial calcium channel 1) (ECaC) (ECaC1) (Osm-9-like TRP channel 3) (OTRPC3)
Q8NHX9	TPCN2 TPC2	Two pore calcium channel protein 2 (Voltage-dependent calcium channel protein TPC2)
Q8NER1	TRPV1 VR1	Transient receptor potential cation channel subfamily V member 1 (TrpV1) (Capsaicin receptor) (Osm-9-like TRP channel 1) (OTRPC1) (Vanilloid receptor 1)
O94759	TRPM2 EREG1 KNP3 LTRPC2 TRPC7	Transient receptor potential cation channel subfamily M member 2 (Estrogen-responsive element-associated gene 1 protein) (Long transient receptor potential channel 2) (LTrpC-2) (LTrpC2) (Transient receptor potential channel 7) (TrpC7) (Transient receptor potential melastatin 2)
Q9H1D0	TRPV6 ECAC2	Transient receptor potential cation channel subfamily V member 6 (TrpV6) (CaT-like) (CaT-L) (Calcium transport protein 1) (CaT1) (Epithelial calcium channel 2) (ECaC2)
P46939	UTRN DMDL DRP1	Utrophin (Dystrophin-related protein 1) (DRP-1)
Q5DID0	UMODL1	Uromodulin-like 1 (Olfactorin)
Q9Y210	TRPC6 TRP6	Short transient receptor potential channel 6 (TrpC6) (Transient receptor protein 6) (TRP-6)
Q8TD43	TRPM4 LTRPC4	Transient receptor potential cation channel subfamily M member 4 (hTRPM4) (Calcium-activated non-selective cation channel 1) (Long transient receptor potential channel 4) (LTrpC-4) (LTrpC4) (Melastatin-4)
P35030	PRSS3 PRSS4 TRY3 TRY4	Trypsin-3 (EC 3.4.21.4) (Brain trypsinogen) (Mesotrypsinogen) (Serine protease 3) (Serine protease 4) (Trypsin III) (Trypsin IV)
Q8NHM4	PRSS3P2 T6 TRY6	Putative trypsin-6 (EC 3.4.21.4) (Serine protease 3 pseudogene 2) (Trypsinogen C)
Q9HCX4	TRPC7 TRP7	Short transient receptor potential channel 7 (TrpC7) (Transient receptor protein 7) (TRP-7) (hTRP7)
P62760	VSNL1 VISL1	Visinin-like protein 1 (VILIP) (VLP-1) (Hippocalcin-like protein 3) (HLP3)
Q9Y5S1	TRPV2 VRL	Transient receptor potential cation channel subfamily V member 2 (TrpV2) (Osm-9-like TRP channel 2) (OTRPC2) (Vanilloid receptor-like protein 1) (VRL-1)
Q96QT4	TRPM7 CHAK1 LTRPC7	Transient receptor potential cation channel subfamily M member 7 (EC 2.7.11.1) (Channel-kinase 1) (Long transient receptor potential channel 7) (LTrpC-7) (LTrpC7)
P07477	PRSS1 TRP1 TRY1 TRYP1	Trypsin-1 (EC 3.4.21.4) (Beta-trypsin) (Cationic trypsinogen) (Serine protease 1) (Trypsin I) [Cleaved into: Alpha-trypsin chain 1; Alpha-trypsin chain 2]
Q14393	GAS6 AXLLG	Growth arrest-specific protein 6 (GAS-6) (AXL receptor tyrosine kinase ligand)
A0FGR9	ESYT3 FAM62C	Extended synaptotagmin-3 (E-Syt3) (Chr3Syt)
Q96C19	EFHD2 SWS1	EF-hand domain-containing protein D2 (Swiprosin-1)
Q9UHF1	EGFL7 MEGF7 UNQ187/PRO1449	Epidermal growth factor-like protein 7 (EGF-like protein 7) (Multiple epidermal growth factor-like domains protein 7) (Multiple EGF-like domains protein 7) (NOTCH4-like protein) (Vascular endothelial statin) (VE-statin) (Zneu1)
Q9BSJ8	ESYT1 FAM62A KIAA0747 MBC2	Extended synaptotagmin-1 (E-Syt1) (Membrane-bound C2 domain-containing protein)
Q7LDG7	RASGRP2 CDC25L MCG7	RAS guanyl-releasing protein 2 (Calcium and DAG-regulated guanine nucleotide exchange factor I) (CalDAG-GEFI) (Cdc25-like protein) (hCDC25L) (F25B3.3 kinase-like protein)
P49619	DGKG DAGK3	Diacylglycerol kinase gamma (DAG kinase gamma) (EC 2.7.1.107) (Diglyceride kinase gamma) (DGK-gamma)
Q75LS8	FKBP9P1 FKBP9L	Putative FK506-binding protein 9-like protein (FK506-binding protein 9-like protein pseudogene)
Q9UBX5	FBLN5 DANCE UNQ184/PRO210	Fibulin-5 (FIBL-5) (Developmental arteries and neural crest EGF-like protein) (Dance) (Urine p50 protein) (UP50)
P00742	F10	Coagulation factor X (EC 3.4.21.6) (Stuart factor) (Stuart-Prower factor) [Cleaved into: Factor X light chain; Factor X heavy chain; Activated factor Xa heavy chain]
A0FGR8	ESYT2 FAM62B KIAA1228	Extended synaptotagmin-2 (E-Syt2) (Chr2Syt)
P20930	FLG	Filaggrin
Q5D862	FLG2 IFPS	Filaggrin-2 (FLG-2) (Intermediate filament-associated and psoriasis-susceptibility protein) (Ifapsoriasin)
Q96AY3	FKBP10 FKBP65 PSEC0056	Peptidyl-prolyl cis-trans isomerase FKBP10 (PPIase FKBP10) (EC 5.2.1.8) (65 kDa FK506-binding protein) (65 kDa FKBP) (FKBP-65) (FK506-binding protein 10) (FKBP-10) (Immunophilin FKBP65) (Rotamase)
O95302	FKBP9 FKBP60 FKBP63	Peptidyl-prolyl cis-trans isomerase FKBP9 (PPIase FKBP9) (EC 5.2.1.8) (63 kDa FK506-binding protein) (63 kDa FKBP) (FKBP-63) (FK506-binding protein 9) (FKBP-9) (Rotamase)
Q6V0I7	FAT4 CDHF14 FATJ Nbla00548	Protocadherin Fat 4 (hFat4) (Cadherin family member 14) (FAT tumor suppressor homolog 4) (Fat-like cadherin protein FAT-J)
O75923	DYSF FER1L1	Dysferlin (Dystrophy-associated fer-1-like protein) (Fer-1-like protein 1)
Q14184	DOC2B DOC2BL	Double C2-like domain-containing protein beta (Doc2-beta)
Q14183	DOC2A	Double C2-like domain-containing protein alpha (Doc2) (Doc2-alpha)
O43854	EDIL3 DEL1	EGF-like repeat and discoidin I-like domain-containing protein 3 (Developmentally-regulated endothelial cell locus 1 protein) (Integrin-binding protein DEL1)
Q9BUP0	EFHD1 SWS2 PP3051	EF-hand domain-containing protein D1 (EF-hand domain-containing protein 1) (Swiprosin-2)
Q03001	DST BP230 BP240 BPAG1 DMH DT KIAA0728	Dystonin (230 kDa bullous pemphigoid antigen) (230/240 kDa bullous pemphigoid antigen) (Bullous pemphigoid antigen 1) (BPA) (Bullous pemphigoid antigen) (Dystonia musculorum protein) (Hemidesmosomal plaque protein)
P11532	DMD	Dystrophin
Q99944	EGFL8 C6orf8 NG3 UNQ8752/PRO29920	Epidermal growth factor-like protein 8 (EGF-like protein 8) (Vascular endothelial statin-2) (VE-statin-2)
P16233	PNLIP	Pancreatic triacylglycerol lipase (PL) (PTL) (Pancreatic lipase) (EC 3.1.1.3)
P54317	PNLIPRP2 PLRP2	Pancreatic lipase-related protein 2 (PL-RP2) (EC 3.1.1.26) (EC 3.1.1.3) (Galactolipase)
O75095	MEGF6 EGFL3 KIAA0815	Multiple epidermal growth factor-like domains protein 6 (Multiple EGF-like domains protein 6) (Epidermal growth factor-like protein 3) (EGF-like protein 3)
Q8IXI1	RHOT2 ARHT2 C16orf39	Mitochondrial Rho GTPase 2 (MIRO-2) (hMiro-2) (EC 3.6.5.-) (Ras homolog gene family member T2)
P14151	SELL LNHR LYAM1	L-selectin (CD62 antigen-like family member L) (Leukocyte adhesion molecule 1) (LAM-1) (Leukocyte surface antigen Leu-8) (Leukocyte-endothelial cell adhesion molecule 1) (LECAM1) (Lymph node homing receptor) (TQ1) (gp90-MEL) (CD antigen CD62L)
Q9UBV8	PEF1 ABP32 UNQ1845/PRO3573	Peflin (PEF protein with a long N-terminal hydrophobic domain) (Penta-EF hand domain-containing protein 1)
Q6J4K2	SLC8B1 NCKX6 NCLX SLC24A6	Mitochondrial sodium/calcium exchanger protein (Na(+)/K(+)/Ca(2+)-exchange protein 6) (Sodium/calcium exchanger protein, mitochondrial) (Sodium/potassium/calcium exchanger 6) (Solute carrier family 24 member 6) (Solute carrier family 8 member B1)
P24844	MYL9 MLC2 MRLC1 MYRL2	Myosin regulatory light polypeptide 9 (20 kDa myosin light chain) (LC20) (MLC-2C) (Myosin RLC) (Myosin regulatory light chain 2, smooth muscle isoform) (Myosin regulatory light chain 9) (Myosin regulatory light chain MRLC1)
Q9UPR5	SLC8A2 KIAA1087 NCX2	Sodium/calcium exchanger 2 (Na(+)/Ca(2+)-exchange protein 2) (Solute carrier family 8 member 2)
Q9HC58	SLC24A3 NCKX3	Sodium/potassium/calcium exchanger 3 (Na(+)/K(+)/Ca(2+)-exchange protein 3) (Solute carrier family 24 member 3)
P32418	SLC8A1 CNC NCX1	Sodium/calcium exchanger 1 (Na(+)/Ca(2+)-exchange protein 1) (Solute carrier family 8 member 1)
Q8IXI2	RHOT1 ARHT1	Mitochondrial Rho GTPase 1 (MIRO-1) (hMiro-1) (EC 3.6.5.-) (Rac-GTP-binding protein-like protein) (Ras homolog gene family member T1)
Q8NI22	MCFD2 SDNSF	Multiple coagulation factor deficiency protein 2 (Neural stem cell-derived neuronal survival protein)
O15296	ALOX15B	Arachidonate 15-lipoxygenase B (15-LOX-B) (EC 1.13.11.33) (15-lipoxygenase 2) (15-LOX-2) (Arachidonate 15-lipoxygenase type II) (Linoleate 13-lipoxygenase 15-LOb) (EC 1.13.11.-)
Q14114	LRP8 APOER2	Low-density lipoprotein receptor-related protein 8 (LRP-8) (Apolipoprotein E receptor 2)
P16581	SELE ELAM1	E-selectin (CD62 antigen-like family member E) (Endothelial leukocyte adhesion molecule 1) (ELAM-1) (Leukocyte-endothelial cell adhesion molecule 2) (LECAM2) (CD antigen CD62E)
P16050	ALOX15 LOG15	Arachidonate 15-lipoxygenase (15-LOX) (15-LOX-1) (EC 1.13.11.33) (12/15-lipoxygenase) (Arachidonate 12-lipoxygenase, leukocyte-type) (12-LOX) (EC 1.13.11.31) (Arachidonate omega-6 lipoxygenase)
P57103	SLC8A3 NCX3	Sodium/calcium exchanger 3 (Na(+)/Ca(2+)-exchange protein 3) (Solute carrier family 8 member 3)
P22897	MRC1 CLEC13D CLEC13DL MRC1L1	Macrophage mannose receptor 1 (MMR) (C-type lectin domain family 13 member D) (C-type lectin domain family 13 member D-like) (Human mannose receptor) (hMR) (Macrophage mannose receptor 1-like protein 1) (CD antigen CD206)
Q99435	NELL2 NRP2	Protein kinase C-binding protein NELL2 (NEL-like protein 2) (Nel-related protein 2)
Q7Z6G3	NECAB2 EFCBP2	N-terminal EF-hand calcium-binding protein 2 (EF-hand calcium-binding protein 2) (Neuronal calcium-binding protein 2) (Synaptotagmin-interacting protein 2) (Stip-2)
Q15413	RYR3 HBRR	Ryanodine receptor 3 (RYR-3) (RyR3) (Brain ryanodine receptor-calcium release channel) (Brain-type ryanodine receptor) (Type 3 ryanodine receptor)
P21817	RYR1 RYDR	Ryanodine receptor 1 (RYR-1) (RyR1) (Skeletal muscle calcium release channel) (Skeletal muscle ryanodine receptor) (Skeletal muscle-type ryanodine receptor) (Type 1 ryanodine receptor)
Q9Y2J0	RPH3A KIAA0985	Rabphilin-3A (Exophilin-1)
Q8NBJ7	SUMF2 PSEC0171 UNQ1968/PRO4500	Inactive C-alpha-formylglycine-generating enzyme 2 (Paralog of formylglycine-generating enzyme) (pFGE) (Sulfatase-modifying factor 2)
P33764	S100A3 S100E	Protein S100-A3 (Protein S-100E) (S100 calcium-binding protein A3)
P46531	NOTCH1 TAN1	Neurogenic locus notch homolog protein 1 (Notch 1) (hN1) (Translocation-associated notch protein TAN-1) [Cleaved into: Notch 1 extracellular truncation (NEXT); Notch 1 intracellular domain (NICD)]
Q02818	NUCB1 NUC	Nucleobindin-1 (CALNUC)
Q7Z3S9	NOTCH2NLA N2N NOTCH2NL	Notch homolog 2 N-terminal-like protein A (Notch homolog 2 N-terminal-like protein)
Q8N987	NECAB1 EFCBP1	N-terminal EF-hand calcium-binding protein 1 (EF-hand calcium-binding protein 1) (Neuronal calcium-binding protein 1)
O95502	NPTXR	Neuronal pentraxin receptor
O60721	SLC24A1 KIAA0702 NCKX1	Sodium/potassium/calcium exchanger 1 (Na(+)/K(+)/Ca(2+)-exchange protein 1) (Retinal rod Na-Ca+K exchanger) (Solute carrier family 24 member 1)
P16112	ACAN AGC1 CSPG1 MSK16	Aggrecan core protein (Cartilage-specific proteoglycan core protein) (CSPCP) (Chondroitin sulfate proteoglycan core protein 1) (Chondroitin sulfate proteoglycan 1) [Cleaved into: Aggrecan core protein 2]
O00602	FCN1 FCNM	Ficolin-1 (Collagen/fibrinogen domain-containing protein 1) (Ficolin-A) (Ficolin-alpha) (M-ficolin)
Q5THR3	EFCAB6 DJBP KIAA1672	EF-hand calcium-binding domain-containing protein 6 (CAP-binding protein complex-interacting protein 1) (DJ-1-binding protein) (DJBP)
O75129	ASTN2 KIAA0634	Astrotactin-2
Q16720	ATP2B3	Plasma membrane calcium-transporting ATPase 3 (PMCA3) (EC 3.6.3.8) (Plasma membrane calcium ATPase isoform 3) (Plasma membrane calcium pump isoform 3)
Q9BWP8	COLEC11 UNQ596/PRO1182	Collectin-11 (Collectin kidney protein 1) (CL-K1)
P04632	CAPNS1 CAPN4 CAPNS	Calpain small subunit 1 (CSS1) (Calcium-activated neutral proteinase small subunit) (CANP small subunit) (Calcium-dependent protease small subunit) (CDPS) (Calcium-dependent protease small subunit 1) (Calpain regulatory subunit)
P02741	CRP PTX1	C-reactive protein [Cleaved into: C-reactive protein(1-205)]
Q96HD1	CRELD1 CIRRIN UNQ188/PRO214	Cysteine-rich with EGF-like domain protein 1
Q9UBG3	CRNN C1orf10 DRC1 PDRC1 SEP53	Cornulin (53 kDa putative calcium-binding protein) (53 kDa squamous epithelial-induced stress protein) (58 kDa heat shock protein) (Squamous epithelial heat shock protein 53) (Tumor-related protein)
Q15147	PLCB4	1-phosphatidylinositol 4,5-bisphosphate phosphodiesterase beta-4 (EC 3.1.4.11) (Phosphoinositide phospholipase C-beta-4) (Phospholipase C-beta-4) (PLC-beta-4)
Q4KWH8	PLCH1 KIAA1069 PLCL3	1-phosphatidylinositol 4,5-bisphosphate phosphodiesterase eta-1 (EC 3.1.4.11) (Phosphoinositide phospholipase C-eta-1) (Phospholipase C-eta-1) (PLC-eta-1) (Phospholipase C-like protein 3) (PLC-L3)
P51178	PLCD1	1-phosphatidylinositol 4,5-bisphosphate phosphodiesterase delta-1 (EC 3.1.4.11) (Phosphoinositide phospholipase C-delta-1) (Phospholipase C-III) (PLC-III) (Phospholipase C-delta-1) (PLC-delta-1)
Q7L5N7	LPCAT2 AGPAT11 AYTL1	Lysophosphatidylcholine acyltransferase 2 (LPC acyltransferase 2) (LPCAT-2) (LysoPC acyltransferase 2) (EC 2.3.1.23) (1-acylglycerol-3-phosphate O-acyltransferase 11) (1-AGP acyltransferase 11) (1-AGPAT 11) (EC 2.3.1.51) (1-acylglycerophosphocholine O-acyltransferase) (1-alkylglycerophosphocholine O-acetyltransferase) (EC 2.3.1.67) (Acetyl-CoA:lyso-platelet-activating factor acetyltransferase) (A…
Q86YW0	PLCZ1	1-phosphatidylinositol 4,5-bisphosphate phosphodiesterase zeta-1 (EC 3.1.4.11) (Phosphoinositide phospholipase C-zeta-1) (Phospholipase C-zeta-1) (PLC-zeta-1) (Testis-development protein NYD-SP27)
P29122	PCSK6 PACE4	Proprotein convertase subtilisin/kexin type 6 (EC 3.4.21.-) (Paired basic amino acid cleaving enzyme 4) (Subtilisin-like proprotein convertase 4) (SPC4) (Subtilisin/kexin-like protease PACE4)
O75340	PDCD6 ALG2	Programmed cell death protein 6 (Apoptosis-linked gene 2 protein homolog) (ALG-2)
Q9P0J1	PDP1 PDP PPM2C	[Pyruvate dehydrogenase [acetyl-transferring]]-phosphatase 1, mitochondrial (PDP 1) (EC 3.1.3.43) (Protein phosphatase 2C) (Pyruvate dehydrogenase phosphatase catalytic subunit 1) (PDPC 1)
Q9Y5P8	PPP2R3B PPP2R3L	Serine/threonine-protein phosphatase 2A regulatory subunit B'' subunit beta (PP2A subunit B isoform PR48) (Protein phosphatase 2A 48 kDa regulatory subunit)
Q68DD2	PLA2G4F	Cytosolic phospholipase A2 zeta (cPLA2-zeta) (EC 3.1.1.4) (Phospholipase A2 group IVF)
Q8NF37	LPCAT1 AYTL2 PFAAP3	Lysophosphatidylcholine acyltransferase 1 (LPC acyltransferase 1) (LPCAT-1) (LysoPC acyltransferase 1) (EC 2.3.1.23) (1-acylglycerophosphocholine O-acyltransferase) (1-alkylglycerophosphocholine O-acetyltransferase) (EC 2.3.1.67) (Acetyl-CoA:lyso-platelet-activating factor acetyltransferase) (Acetyl-CoA:lyso-PAF acetyltransferase) (Lyso-PAF acetyltransferase) (LysoPAFAT) (Acyltransferase-like 2) …
Q06190	PPP2R3A PPP2R3	Serine/threonine-protein phosphatase 2A regulatory subunit B'' subunit alpha (PP2A subunit B isoform PR72/PR130) (PP2A subunit B isoform R3 isoform) (PP2A subunit B isoforms B''-PR72/PR130) (PP2A subunit B isoforms B72/B130) (Serine/threonine-protein phosphatase 2A 72/130 kDa regulatory subunit B)
P14555	PLA2G2A PLA2B PLA2L RASF-A	Phospholipase A2, membrane associated (EC 3.1.1.4) (GIIC sPLA2) (Group IIA phospholipase A2) (Non-pancreatic secretory phospholipase A2) (NPS-PLA2) (Phosphatidylcholine 2-acylhydrolase 2A)
Q9NZK7	PLA2G2E	Group IIE secretory phospholipase A2 (GIIE sPLA2) (sPLA2-IIE) (EC 3.1.1.4) (Phosphatidylcholine 2-acylhydrolase 2E)
O15496	PLA2G10	Group 10 secretory phospholipase A2 (EC 3.1.1.4) (Group X secretory phospholipase A2) (GX sPLA2) (sPLA2-X) (Phosphatidylcholine 2-acylhydrolase 10)
Q02509	OC90 PLA2L	Otoconin-90 (Oc90) (Phospholipase A2 homolog)
A6NHN0	OTOL1	Otolin-1
Q3MJ16	PLA2G4E	Cytosolic phospholipase A2 epsilon (cPLA2-epsilon) (EC 3.1.1.4) (Phospholipase A2 group IVE)
Q7Z443	PKD1L3	Polycystic kidney disease protein 1-like 3 (PC1-like 3 protein) (Polycystin-1L3)
Q8TDX9	PKD1L1 UNQ5785/PRO19563	Polycystic kidney disease protein 1-like 1 (PC1-like 1 protein) (Polycystin-1L1)
O14829	PPEF1 PPEF PPP7C	Serine/threonine-protein phosphatase with EF-hands 1 (PPEF-1) (EC 3.1.3.16) (Protein phosphatase with EF calcium-binding domain) (PPEF) (Serine/threonine-protein phosphatase 7) (PP7)
Q01970	PLCB3	1-phosphatidylinositol 4,5-bisphosphate phosphodiesterase beta-3 (EC 3.1.4.11) (Phosphoinositide phospholipase C-beta-3) (Phospholipase C-beta-3) (PLC-beta-3)
Q00722	PLCB2	1-phosphatidylinositol 4,5-bisphosphate phosphodiesterase beta-2 (EC 3.1.4.11) (Phosphoinositide phospholipase C-beta-2) (Phospholipase C-beta-2) (PLC-beta-2)
Q9NRD5	PICK1 PRKCABP	PRKCA-binding protein (Protein interacting with C kinase 1) (Protein kinase C-alpha-binding protein)
P0CE71	OCM2 OCMN	Putative oncomodulin-2
Q8WWZ8	OIT3 LZP UNQ826/PRO1753	Oncoprotein-induced transcript 3 protein (Liver-specific zona pellucida domain-containing protein)
P80303	NUCB2 NEFA	Nucleobindin-2 (DNA-binding protein NEFA) (Epididymis secretory protein Li 109) (Gastric cancer antigen Zg4) (Prepronesfatin) [Cleaved into: Nesfatin-1]
P13797	PLS3	Plastin-3 (T-plastin)
O14830	PPEF2	Serine/threonine-protein phosphatase with EF-hands 2 (PPEF-2) (EC 3.1.3.16)
P07225	PROS1 PROS	Vitamin K-dependent protein S
Q9GZZ6	CHRNA10 NACHRA10	Neuronal acetylcholine receptor subunit alpha-10 (Nicotinic acetylcholine receptor subunit alpha-10) (NACHR alpha-10)
P35609	ACTN2	Alpha-actinin-2 (Alpha-actinin skeletal muscle isoform 2) (F-actin cross-linking protein)
Q08043	ACTN3	Alpha-actinin-3 (Alpha-actinin skeletal muscle isoform 3) (F-actin cross-linking protein)
P19961	AMY2B	Alpha-amylase 2B (EC 3.2.1.1) (1,4-alpha-D-glucan glucanohydrolase 2B) (Carcinoid alpha-amylase)
Q9Y6U3	SCIN KIAA1905	Adseverin (Scinderin)
Q86SQ3	ADGRE4P EMR4 EMR4P GPR127 PGR16	Putative adhesion G protein-coupled receptor E4P (EGF-like module receptor 4) (EGF-like module-containing mucin-like hormone receptor-like 4) (G-protein coupled receptor 127) (G-protein coupled receptor PGR16)
A0A1B0GW98	CACNA1D	Voltage-dependent L-type calcium channel subunit alpha-1D (Fragment)
A0A1B0GXG3	NCALD	Neurocalcin-delta (Fragment)
A0A1B0GTZ7	KCNIP1	Kv channel-interacting protein 1
A0A0G2JN52	PPP2R3B	Serine/threonine-protein phosphatase 2A regulatory subunit B'' subunit beta
H0YKC8	CIB2	Calcium and integrin-binding family member 2
B5MBY2	DGKB	Diacylglycerol kinase (DAG kinase) (EC 2.7.1.107)
A0A0D9SGF6	SPTAN1	Spectrin alpha chain, non-erythrocytic 1
F6U1T9	PPP3R1	Calcineurin subunit B type 1
E7ETZ0	CALM1	Calmodulin-1
H0YMF3	RASGRP1	RAS guanyl-releasing protein 1 (Fragment)
A0A087X285	SCUBE1	Signal peptide, CUB and EGF-like domain-containing protein 1
E9PFU3	CALN1	Calcium-binding protein 8 (Fragment)
A0A1B0GVQ9	CACNA1A	Voltage-dependent P/Q-type calcium channel subunit alpha
E7ESS6	CAPN9	Calpain-9
C9JAM3	PLS1	Plastin-1 (Fragment)
F6QMI7	DST	Dystonin
B9DI82	PLCH2	Phosphoinositide phospholipase C (EC 3.1.4.11) (Fragment)
F5GXS2	ACTN4	Alpha-actinin-4
E5RHB1	EFCAB3	EF-hand calcium-binding domain-containing protein 3 (Fragment)
K7EKF7	CACNA1A	Voltage-dependent P/Q-type calcium channel subunit alpha-1A (Fragment)
C9JIZ3	GCA	Grancalcin (Fragment)
A0A1B0GUS3	CACNA1A	Voltage-dependent P/Q-type calcium channel subunit alpha
F5H514	RASGRP1	RAS guanyl-releasing protein 1
E5RIG4	NCALD	Neurocalcin-delta (Fragment)
F8W9Z1	CACNA1E	Voltage-dependent R-type calcium channel subunit alpha
Q15818	NPTX1	Neuronal pentraxin-1 (NP1) (Neuronal pentraxin I) (NP-I)
O60462	NRP2 VEGF165R2	Neuropilin-2 (Vascular endothelial cell growth factor 165 receptor 2)
A1KZ92	PXDNL VPO2	Peroxidasin-like protein (EC 1.11.1.7) (Cardiac peroxidase) (Vascular peroxidase 2) (polysomal ribonuclease 1) (PRM1)
B1AKR1	CALML6 hCG_23465	Calmodulin-like 6, isoform CRA_a (Calmodulin-like protein 6)
H3BRW4	PLA2G10 hCG_1746186	Phospholipase A(2) (EC 3.1.1.4)
Q9BS22	PLA2G1B	Phospholipase A(2) (EC 3.1.1.4)
Q59GD8	CACNA1D	Calcium channel, voltage-dependent, L type, alpha 1D subunit variant (Voltage-dependent L-type calcium channel subunit alpha-1D) (Fragment)
B8ZZ19	PVALB	Parvalbumin alpha (Fragment)
B5TYJ1	CACNA1A	Voltage-dependent P/Q-type calcium channel subunit alpha
K7EKD8	CAPNS1	Calpain small subunit 1
E5RI95	NCALD	Neurocalcin-delta (Fragment)
J3QRS3	MYL12A MRCL3 hCG_2045956	Myosin regulatory light chain 12A (Myosin regulatory light chain MRCL3, isoform CRA_b)
A6NER6	CALB2 hCG_2011413	Calbindin 2, 29kDa (Calretinin), isoform CRA_b
E5RG14	CALB1	Calbindin (Fragment)
A0A140T9R5	NOTCH4	NOTCH4 (Neurogenic locus notch homolog protein 4)
B1AQK6	CACNA1B	Voltage-dependent N-type calcium channel subunit alpha
Q5Y7D3	HLA-DQB1	HLA class II histocompatibility antigen, DQ beta 1 chain (MHC class II antigen)
A0A0G2JQ62	LPCAT1	Lysophosphatidylcholine acyltransferase 1 (Fragment)
A0A1U9X989	NOTCH4	NOTCH4 (Neurogenic locus notch homolog protein 4)
B4DGW9	HPCAL4	cDNA FLJ50758, moderately similar to Hippocalcin-like protein 4
A0A140T8Y6	NOTCH4	NOTCH4 (Neurogenic locus notch homolog protein 4)
H0YC53	EFCAB1	EF-hand calcium-binding domain-containing protein 1 (Fragment)
A0A1B0GTP8	CACNA1D	Voltage-dependent L-type calcium channel subunit alpha-1D
F5GY28	CACNA1C	Voltage-dependent L-type calcium channel subunit alpha
B4DWB8	ADGRE2	Adhesion G protein-coupled receptor E2 (cDNA FLJ60183, highly similar to Homo sapiens egf-like module containing, mucin-like, hormone receptor-like 2, transcript variant 6, mRNA)
M0QZ52	CALM1 CALM2 CALM3 hCG_20313	Calmodulin 3 (Phosphorylase kinase, delta), isoform CRA_d (Calmodulin-1) (Calmodulin-2) (Calmodulin-3)
H3BMN5	CALB2	Calretinin (Fragment)
J3KN42	SLC25A24	Calcium-binding mitochondrial carrier protein SCaMC-1
A0A1B0GVX1	CACNA1A	Voltage-dependent P/Q-type calcium channel subunit alpha-1A (Fragment)
A0A0U1RRK1	MICU1	Calcium uptake protein 1, mitochondrial
J3KTJ1	MYL12A	Myosin regulatory light chain 12A (Fragment)
C9JVY2	PLS1	Plastin-1 (Fragment)
A6PVH5	GUCA1A	Guanylyl cyclase-activating protein 1 (Fragment)
G3V4E1	DGKA	Diacylglycerol kinase (DAG kinase) (EC 2.7.1.107) (Fragment)
A0A1B0GU74	CACNA1A	Voltage-dependent P/Q-type calcium channel subunit alpha
D6RJ91	MYL5	Myosin light chain 5 (Fragment)
E5RIZ8	CALB1	Calbindin (Fragment)
H3BV08	CAPN3	Calpain-3 (Fragment)
C9J359	PLS1	Plastin-1 (Fragment)
H7C592	PPEF1	Serine/threonine-protein phosphatase with EF-hands 1 (Fragment)
E9PDI6	CACNA1C	Voltage-dependent L-type calcium channel subunit alpha
H7BYZ3		Uncharacterized protein
K7EQ95	CACNA1A	Voltage-dependent P/Q-type calcium channel subunit alpha-1A (Fragment)
A0A1B0GTI4	CACNA1A	Voltage-dependent P/Q-type calcium channel subunit alpha
F8W062	PLA2G1B	Phospholipase A(2) (EC 3.1.1.4)
H0Y3T6	SDF4	45 kDa calcium-binding protein (Fragment)
A0A0A0MSA1	CACNA1C	Voltage-dependent L-type calcium channel subunit alpha
C9J0K6	SRI	Sorcin
E9PIE8	CACNA1E	Voltage-dependent R-type calcium channel subunit alpha (Fragment)
A0A1B0GU81	CACNA1A	Voltage-dependent P/Q-type calcium channel subunit alpha
E5RIZ1	NCALD	Neurocalcin-delta (Fragment)
G3V4U0	FBLN5	Fibulin-5
E9PHM6	DST	Dystonin
F5H522	CACNA1C	Voltage-dependent L-type calcium channel subunit alpha
A0A0G2JNR6	PPP2R3B	Serine/threonine-protein phosphatase 2A regulatory subunit B'' subunit beta
H0Y314	MACF1	Microtubule-actin cross-linking factor 1, isoforms 1/2/3/5 (Fragment)
E5RHE8	NCALD	Neurocalcin-delta (Fragment)
B1AH90	SCUBE1	Signal peptide, CUB and EGF-like domain-containing protein 1
A0A0A0MR67	CACNA1C	Voltage-dependent L-type calcium channel subunit alpha
E7EMB3	CALM2	Calmodulin-2
H0Y6T5	MACF1	Microtubule-actin cross-linking factor 1, isoforms 1/2/3/5 (Fragment)
H0Y390	MACF1	Microtubule-actin cross-linking factor 1, isoforms 1/2/3/5 (Fragment)
E5RHC8	NCALD	Neurocalcin-delta (Fragment)
H7BXD5	GCA	Grancalcin
E5RJJ6	NCALD	Neurocalcin-delta (Fragment)
A0A1B0GTN7	CACNA1A	Voltage-dependent P/Q-type calcium channel subunit alpha
C9JU08	PLS1	Plastin-1 (Fragment)
A0A1B0GWE1	CACNA1D	Voltage-dependent L-type calcium channel subunit alpha (Fragment)
B1AQK7	CACNA1B	Voltage-dependent N-type calcium channel subunit alpha
C9J8G2	CABP1	Calcium-binding protein 1
U3KPR7	CAPNS1	Calpain small subunit 1 (Fragment)
H7C4S8	CACNA1D	Voltage-dependent L-type calcium channel subunit alpha-1D (Fragment)
M0R0K5	ADGRE2	Adhesion G protein-coupled receptor E2
Q5TBN5	LCP1	Plastin-2 (Fragment)
U3KQE2	CAPNS1	Calpain small subunit 1 (Fragment)
A0A087WZV3	CACNA1C	Voltage-dependent L-type calcium channel subunit alpha-1C
H7BZI1	NUCB1	Nucleobindin-1 (Fragment)
C9J0F3	PLS1	Plastin-1 (Fragment)
F8W9J4	DST	Dystonin
H0Y9X3	PDCD6	Programmed cell death protein 6 (Fragment)
J3KMZ3	PLA2G2C	Phospholipase A(2) (EC 3.1.1.4)

## Sheet: Cu_proteins in Cadmium
Entry	Gene names	Protein names
P05067	APP A4 AD1	Amyloid-beta A4 protein (ABPP) (APPI) (APP) (Alzheimer disease amyloid protein) (Amyloid precursor protein) (Amyloid-beta precursor protein) (Cerebral vascular amyloid peptide) (CVAP) (PreA4) (Protease nexin-II) (PN-II) [Cleaved into: N-APP; Soluble APP-alpha (S-APP-alpha); Soluble APP-beta (S-APP-beta); C99 (Beta-secretase C-terminal fragment) (Beta-CTF); Amyloid-beta protein 42 (Abeta42) (Beta-…
P51693	APLP1	Amyloid-like protein 1 (APLP) (APLP-1) [Cleaved into: C30]
E9PFZ2	CP	Ceruloplasmin
P00450	CP	Ceruloplasmin (EC 1.16.3.1) (Ferroxidase)
H7C5R1	CP	Ceruloplasmin (Fragment)
P12259	F5	Coagulation factor V (Activated protein C cofactor) (Proaccelerin, labile factor) [Cleaved into: Coagulation factor V heavy chain; Coagulation factor V light chain]
O14618	CCS	Copper chaperone for superoxide dismutase (Superoxide dismutase copper chaperone)
O00244	ATOX1 HAH1	Copper transport protein ATOX1 (Metal transport protein ATX1)
Q04656	ATP7A MC1 MNK	Copper-transporting ATPase 1 (EC 3.6.3.54) (Copper pump 1) (Menkes disease-associated protein)
P35670	ATP7B PWD WC1 WND	Copper-transporting ATPase 2 (EC 3.6.3.54) (Copper pump 2) (Wilson disease-associated protein) [Cleaved into: WND/140 kDa]
P00395	MT-CO1 COI COXI MTCO1	Cytochrome c oxidase subunit 1 (EC 1.9.3.1) (Cytochrome c oxidase polypeptide I)
P00403	MT-CO2 COII COX2 COXII MTCO2	Cytochrome c oxidase subunit 2 (Cytochrome c oxidase polypeptide II)
Q8TC92	ENOX1 PIG38	Ecto-NOX disulfide-thiol exchanger 1 (Candidate growth-related and time keeping constitutive hydroquinone [NADH] oxidase) (cCNOX) (Cell proliferation-inducing gene 38 protein) (Constitutive Ecto-NOX) (cNOX) [Includes: Hydroquinone [NADH] oxidase (EC 1.-.-.-); Protein disulfide-thiol oxidoreductase (EC 1.-.-.-)]
Q16206	ENOX2 COVA1	Ecto-NOX disulfide-thiol exchanger 2 (APK1 antigen) (Cytosolic ovarian carcinoma antigen 1) (Tumor-associated hydroquinone oxidase) (tNOX) [Includes: Hydroquinone [NADH] oxidase (EC 1.-.-.-); Protein disulfide-thiol oxidoreductase (EC 1.-.-.-)]
P08294	SOD3	Extracellular superoxide dismutase [Cu-Zn] (EC-SOD) (EC 1.15.1.1)
Q8NBK3	SUMF1 PSEC0152 UNQ3037/PRO9852	Formylglycine-generating enzyme (FGE) (EC 1.8.3.7) (C-alpha-formylglycine-generating enzyme 1) (Sulfatase-modifying factor 1)
E7ES21	HEPH	Hephaestin
Q9BQS7	HEPH KIAA0698 UNQ2562/PRO6242	Hephaestin (EC 1.-.-.-)
A0A0C4DG76	HEPH hCG_18329	Hephaestin, isoform CRA_c
Q6MZM0	HEPHL1	Hephaestin-like protein 1 (EC 1.-.-.-)
P04196	HRG	Histidine-rich glycoprotein (Histidine-proline-rich glycoprotein) (HPRG)
X6RKS3	PRNP	Major prion protein (Fragment)
A2A2V1	PRNP	Major prion protein (Fragment)
P04156	PRNP ALTPRP PRIP PRP	Major prion protein (PrP) (ASCR) (PrP27-30) (PrP33-35C) (CD antigen CD230)
P04731	MT1A MT1S	Metallothionein-1A (MT-1A) (Metallothionein-IA) (MT-IA)
P07438	MT1B MT1Q	Metallothionein-1B (MT-1B) (Metallothionein-IB) (MT-IB)
P04732	MT1E	Metallothionein-1E (MT-1E) (Metallothionein-IE) (MT-IE)
P04733	MT1F PRO0376	Metallothionein-1F (MT-1F) (Metallothionein-IF) (MT-IF)
P13640	MT1G MT1K MT1M	Metallothionein-1G (MT-1G) (Metallothionein-1K) (MT-1K) (Metallothionein-IG) (MT-IG)
P80294	MT1H	Metallothionein-1H (MT-1H) (Metallothionein-0) (MT-0) (Metallothionein-IH) (MT-IH)
Q93083	MT1L	Metallothionein-1L (MT-1L) (Metallothionein-IL) (MT-IL)
Q8N339	MT1M MT1K	Metallothionein-1M (MT-1M) (Metallothionein-IM) (MT-IM)
P80297	MT1X	Metallothionein-1X (MT-1X) (Metallothionein-IX) (MT-IX)
P25713	MT3	Metallothionein-3 (MT-3) (GIFB) (GIF) (Growth inhibitory factor) (Metallothionein-III) (MT-III)
P47944	MT4	Metallothionein-4 (MT-4) (Metallothionein-IV) (MT-IV)
P19021	PAM	Peptidyl-glycine alpha-amidating monooxygenase (PAM) [Includes: Peptidylglycine alpha-hydroxylating monooxygenase (PHM) (EC 1.14.17.3); Peptidyl-alpha-hydroxyglycine alpha-amidating lyase (EC 4.3.2.5) (Peptidylamidoglycolate lyase) (PAL)]
Q9UKY0	PRND DPL UNQ1830/PRO3443	Prion-like protein doppel (PrPLP) (Prion protein 2)
P80511	S100A12	Protein S100-A12 (CGRP) (Calcium-binding protein in amniotic fluid 1) (CAAF1) (Calgranulin-C) (CAGC) (Extracellular newly identified RAGE-binding protein) (EN-RAGE) (Migration inhibitory factor-related protein 6) (MRP-6) (p6) (Neutrophil S100 protein) (S100 calcium-binding protein A12) [Cleaved into: Calcitermin]
Q99584	S100A13	Protein S100-A13 (S100 calcium-binding protein A13)
P33763	S100A5 S100D	Protein S100-A5 (Protein S-100D) (S100 calcium-binding protein A5)
O75880	SCO1 SCOD1	Protein SCO1 homolog, mitochondrial
O43819	SCO2	Protein SCO2 homolog, mitochondrial
H7BYH4	SOD1	Superoxide dismutase [Cu-Zn] (EC 1.15.1.1)
P00441	SOD1	Superoxide dismutase [Cu-Zn] (EC 1.15.1.1) (Superoxide dismutase 1) (hSod1)

## Sheet: Zn_proteins in Aluminum
Entry	Gene names	Protein names
E9PDH4	PIKFYVE	1-phosphatidylinositol 3-phosphate 5-kinase (Fragment)
Q9Y2I7	PIKFYVE KIAA0981 PIP5K3	1-phosphatidylinositol 3-phosphate 5-kinase (Phosphatidylinositol 3-phosphate 5-kinase) (EC 2.7.1.150) (FYVE finger-containing phosphoinositide kinase) (PIKfyve) (Phosphatidylinositol 3-phosphate 5-kinase type III) (PIPkin-III) (Type III PIP kinase)
Q05823	RNASEL RNS4	2-5A-dependent ribonuclease (2-5A-dependent RNase) (EC 3.1.26.-) (Ribonuclease 4) (Ribonuclease L) (RNase L)
E5RGL6	ARFGAP1	ADP-ribosylation factor GTPase-activating protein 1
Q8N6T3	ARFGAP1 ARF1GAP	ADP-ribosylation factor GTPase-activating protein 1 (ARF GAP 1) (ADP-ribosylation factor 1 GTPase-activating protein) (ARF1 GAP) (ARF1-directed GTPase-activating protein)
E5RIU2	ARFGAP1	ADP-ribosylation factor GTPase-activating protein 1 (Fragment)
F8VWB3	ARFGAP1	ADP-ribosylation factor GTPase-activating protein 1 (Fragment)
E5RHC5	ARFGAP1	ADP-ribosylation factor GTPase-activating protein 1 (Fragment)
E9PNY8	ARFGAP2	ADP-ribosylation factor GTPase-activating protein 2
E9PM18	ARFGAP2	ADP-ribosylation factor GTPase-activating protein 2
E9PM63	ARFGAP2	ADP-ribosylation factor GTPase-activating protein 2
E9PMR9	ARFGAP2	ADP-ribosylation factor GTPase-activating protein 2
G5E9L0	ARFGAP2	ADP-ribosylation factor GTPase-activating protein 2
Q8N6H7	ARFGAP2 ZNF289 Nbla10535	ADP-ribosylation factor GTPase-activating protein 2 (ARF GAP 2) (GTPase-activating protein ZNF289) (Zinc finger protein 289)
E9PN48	ARFGAP2	ADP-ribosylation factor GTPase-activating protein 2 (Fragment)
E9PQP3	ARFGAP2	ADP-ribosylation factor GTPase-activating protein 2 (Fragment)
E9PIY6	ARFGAP2	ADP-ribosylation factor GTPase-activating protein 2 (Fragment)
H0YDX1	ARFGAP2	ADP-ribosylation factor GTPase-activating protein 2 (Fragment)
E9PMU9	ARFGAP2	ADP-ribosylation factor GTPase-activating protein 2 (Fragment)
E9PK28	ARFGAP2	ADP-ribosylation factor GTPase-activating protein 2 (Fragment)
E9PJT7	ARFGAP2	ADP-ribosylation factor GTPase-activating protein 2 (Fragment)
A0A0D9SF70	ARFGAP2 ZNF289 hCG_1811553	ADP-ribosylation factor GTPase-activating protein 2 (Zinc finger protein 289, ID1 regulated, isoform CRA_d)
Q9NP61	ARFGAP3 ARFGAP1	ADP-ribosylation factor GTPase-activating protein 3 (ARF GAP 3)
B0QYV9	ARFGAP3	ADP-ribosylation factor GTPase-activating protein 3 (Fragment)
B0QYV8	ARFGAP3	ADP-ribosylation factor GTPase-activating protein 3 (Fragment)
Q9Y4W6	AFG3L2	AFG3-like protein 2 (EC 3.4.24.-) (Paraplegin-like protein)
A0A087WTD7	AKAP13	A-kinase anchor protein 13
A8MYJ1	AKAP13	A-kinase anchor protein 13
Q12802	AKAP13 BRX HT31 LBC	A-kinase anchor protein 13 (AKAP-13) (AKAP-Lbc) (Breast cancer nuclear receptor-binding auxiliary protein) (Guanine nucleotide exchange factor Lbc) (Human thyroid-anchoring protein 31) (Lymphoid blast crisis oncogene) (LBC oncogene) (Non-oncogenic Rho GTPase-specific GTP exchange factor) (Protein kinase A-anchoring protein 13) (PRKA13) (p47)
P05187	ALPP PLAP	Alkaline phosphatase, placental type (EC 3.1.3.1) (Alkaline phosphatase Regan isozyme) (Placental alkaline phosphatase 1) (PLAP-1)
P10696	ALPPL2 ALPPL	Alkaline phosphatase, placental-like (EC 3.1.3.1) (ALP-1) (Alkaline phosphatase Nagao isozyme) (Germ cell alkaline phosphatase) (GCAP) (Placental alkaline phosphatase-like) (PLAP-like)
P05186	ALPL	Alkaline phosphatase, tissue-nonspecific isozyme (AP-TNAP) (TNSALP) (EC 3.1.3.1) (Alkaline phosphatase liver/bone/kidney isozyme)
E7EWH7	CRYAA	Alpha-crystallin A chain
P02489	CRYAA CRYA1 HSPB4	Alpha-crystallin A chain (Heat shock protein beta-4) (HspB4) [Cleaved into: Alpha-crystallin A(1-172); Alpha-crystallin A(1-168); Alpha-crystallin A(1-162)]
A0A096LPJ9	CRYAA2	Alpha-crystallin A2 chain
A0A140G945	CRYAA2 CRYAA	Alpha-crystallin A2 chain [Cleaved into: Alpha-crystallin A2(1-172); Alpha-crystallin A2(1-168); Alpha-crystallin A2(1-162)]
P02511	CRYAB CRYA2 HSPB5	Alpha-crystallin B chain (Alpha(B)-crystallin) (Heat shock protein beta-5) (HspB5) (Renal carcinoma antigen NY-REN-27) (Rosenthal fiber component)
E9PR44	CRYAB	Alpha-crystallin B chain (Fragment)
E9PJL7	CRYAB	Alpha-crystallin B chain (Fragment)
Q6GPI0	ANKMY1	ANKMY1 protein (Ankyrin repeat and MYND domain-containing protein 1)
B5MBY4	ANKMY1 hCG_1811573	Ankyrin repeat and MYND domain containing 1, isoform CRA_a (Ankyrin repeat and MYND domain-containing protein 1)
J3KQ21	ANKMY1	Ankyrin repeat and MYND domain-containing protein 1
J3KPY5	ANKMY1	Ankyrin repeat and MYND domain-containing protein 1
Q9P2S6	ANKMY1 TSAL1 ZMYND13	Ankyrin repeat and MYND domain-containing protein 1 (Testis-specific ankyrin-like protein 1) (Zinc finger MYND domain-containing protein 13)
Q8IV38	ANKMY2	Ankyrin repeat and MYND domain-containing protein 2
Q7Z2E3	APTX AXA1	Aprataxin (EC 3.1.11.7) (EC 3.1.12.2) (Forkhead-associated domain histidine triad-like protein) (FHA-HIT)
Q96II5	ARAF	ARAF protein (Serine/threonine-protein kinase A-Raf)
J3QRU8	GIT1	ARF GTPase-activating protein GIT1
A0A0C4DGN6	GIT1	ARF GTPase-activating protein GIT1
Q9Y2X7	GIT1	ARF GTPase-activating protein GIT1 (ARF GAP GIT1) (Cool-associated and tyrosine-phosphorylated protein 1) (CAT-1) (CAT1) (G protein-coupled receptor kinase-interactor 1) (GRK-interacting protein 1)
K7EN79	GIT1	ARF GTPase-activating protein GIT1 (Fragment)
F8WAK2	GIT2	ARF GTPase-activating protein GIT2
F8VXI9	GIT2	ARF GTPase-activating protein GIT2
F8W822	GIT2	ARF GTPase-activating protein GIT2
Q14161	GIT2 KIAA0148	ARF GTPase-activating protein GIT2 (ARF GAP GIT2) (Cool-interacting tyrosine-phosphorylated protein 2) (CAT-2) (CAT2) (G protein-coupled receptor kinase-interactor 2) (GRK-interacting protein 2)
B8ZZY2	AGFG1	Arf-GAP domain and FG repeat-containing protein 1
P52594	AGFG1 HRB RAB RIP	Arf-GAP domain and FG repeat-containing protein 1 (HIV-1 Rev-binding protein) (Nucleoporin-like protein RIP) (Rev-interacting protein) (Rev/Rex activation domain-binding protein)
A0A0C4DG34	AGFG2 HRBL hCG_20457	Arf-GAP domain and FG repeat-containing protein 2 (HIV-1 Rev binding protein-like, isoform CRA_c)
O95081	AGFG2 HRBL RABR	Arf-GAP domain and FG repeat-containing protein 2 (HIV-1 Rev-binding protein-like protein) (Rev/Rex activation domain-binding protein related) (RAB-R)
Q15027	ACAP1 CENTB1 KIAA0050	Arf-GAP with coiled-coil, ANK repeat and PH domain-containing protein 1 (Centaurin-beta-1) (Cnt-b1)
A0A087X1H5	ACAP2	Arf-GAP with coiled-coil, ANK repeat and PH domain-containing protein 2
Q15057	ACAP2 CENTB2 KIAA0041	Arf-GAP with coiled-coil, ANK repeat and PH domain-containing protein 2 (Centaurin-beta-2) (Cnt-b2)
H7C3K3	ACAP2	Arf-GAP with coiled-coil, ANK repeat and PH domain-containing protein 2 (Fragment)
A0A0U1RQT1	ACAP2	Arf-GAP with coiled-coil, ANK repeat and PH domain-containing protein 2 (Fragment)
Q96P50	ACAP3 CENTB5 KIAA1716	Arf-GAP with coiled-coil, ANK repeat and PH domain-containing protein 3 (Centaurin-beta-5) (Cnt-b5)
O75689	ADAP1 CENTA1	Arf-GAP with dual PH domain-containing protein 1 (Centaurin-alpha-1) (Cnt-a1) (Putative MAPK-activating protein PM25)
C9JN36	ADAP1	Arf-GAP with dual PH domain-containing protein 1 (Fragment)
J3KT70	ADAP2	Arf-GAP with dual PH domain-containing protein 2
J3QRA6	ADAP2	Arf-GAP with dual PH domain-containing protein 2
Q2V6Q1	ADAP2 CENTA2	Arf-GAP with dual PH domain-containing protein 2 (Centaurin alpha 2)
Q9NPF8	ADAP2 CENTA2	Arf-GAP with dual PH domain-containing protein 2 (Centaurin-alpha-2) (Cnt-a2)
J3QRD3	ADAP2	Arf-GAP with dual PH domain-containing protein 2 (Fragment)
E7EUN2	AGAP1	Arf-GAP with GTPase, ANK repeat and PH domain-containing protein 1
F5GXM9	AGAP1	Arf-GAP with GTPase, ANK repeat and PH domain-containing protein 1
A0A087X1U1	AGAP1	Arf-GAP with GTPase, ANK repeat and PH domain-containing protein 1
Q9UPQ3	AGAP1 CENTG2 KIAA1099	Arf-GAP with GTPase, ANK repeat and PH domain-containing protein 1 (AGAP-1) (Centaurin-gamma-2) (Cnt-g2) (GTP-binding and GTPase-activating protein 1) (GGAP1)
H7C0A7	AGAP1	Arf-GAP with GTPase, ANK repeat and PH domain-containing protein 1 (Fragment)
Q8TF27	AGAP11 KIAA1975	Arf-GAP with GTPase, ANK repeat and PH domain-containing protein 11 (AGAP-11) (Centaurin-gamma-like protein KIAA1975)
F8VVT9	AGAP2	Arf-GAP with GTPase, ANK repeat and PH domain-containing protein 2
Q99490	AGAP2 CENTG1 KIAA0167	Arf-GAP with GTPase, ANK repeat and PH domain-containing protein 2 (AGAP-2) (Centaurin-gamma-1) (Cnt-g1) (GTP-binding and GTPase-activating protein 2) (GGAP2) (Phosphatidylinositol 3-kinase enhancer) (PIKE)
J3KNM6	AGAP2	Arf-GAP with GTPase, ANK repeat and PH domain-containing protein 2 (Fragment)
Q96P47	AGAP3 CENTG3	Arf-GAP with GTPase, ANK repeat and PH domain-containing protein 3 (AGAP-3) (CRAM-associated GTPase) (CRAG) (Centaurin-gamma-3) (Cnt-g3) (MR1-interacting protein) (MRIP-1)
H0Y873	AGAP3	Arf-GAP with GTPase, ANK repeat and PH domain-containing protein 3 (Fragment)
A0A087X0Z1	AGAP4	Arf-GAP with GTPase, ANK repeat and PH domain-containing protein 4
A0A087WSV4	AGAP4	Arf-GAP with GTPase, ANK repeat and PH domain-containing protein 4
A0A087WTP8	AGAP4	Arf-GAP with GTPase, ANK repeat and PH domain-containing protein 4
Q96P64	AGAP4 AGAP8 CTGLF1 CTGLF5 MRIP2	Arf-GAP with GTPase, ANK repeat and PH domain-containing protein 4 (AGAP-4) (Centaurin-gamma-like family member 1) (Centaurin-gamma-like family member 5)
J3KQL4	AGAP5	Arf-GAP with GTPase, ANK repeat and PH domain-containing protein 5
A0A0D9SFU9	AGAP5	Arf-GAP with GTPase, ANK repeat and PH domain-containing protein 5
A6NIR3	AGAP5 CTGLF2	Arf-GAP with GTPase, ANK repeat and PH domain-containing protein 5 (AGAP-5) (Centaurin-gamma-like family member 2)
A0A087X0I8	AGAP6	Arf-GAP with GTPase, ANK repeat and PH domain-containing protein 6
Q5VW22	AGAP6 CTGLF3	Arf-GAP with GTPase, ANK repeat and PH domain-containing protein 6 (AGAP-6) (Centaurin-gamma-like family member 3)
Q5VTM2	AGAP9 CTGLF6	Arf-GAP with GTPase, ANK repeat and PH domain-containing protein 9 (AGAP-9) (Centaurin-gamma-like family member 6)
E7EU13	ARAP1	Arf-GAP with Rho-GAP domain, ANK repeat and PH domain-containing protein 1
Q96P48	ARAP1 CENTD2 KIAA0782	Arf-GAP with Rho-GAP domain, ANK repeat and PH domain-containing protein 1 (Centaurin-delta-2) (Cnt-d2)
Q8WZ64	ARAP2 CENTD1 KIAA0580	Arf-GAP with Rho-GAP domain, ANK repeat and PH domain-containing protein 2 (Centaurin-delta-1) (Cnt-d1) (Protein PARX)
G5E9Y3	ARAP3 CENTD3 hCG_1980706	Arf-GAP with Rho-GAP domain, ANK repeat and PH domain-containing protein 3 (Centaurin, delta 3, isoform CRA_b)
Q8WWN8	ARAP3 CENTD3	Arf-GAP with Rho-GAP domain, ANK repeat and PH domain-containing protein 3 (Centaurin-delta-3) (Cnt-d3)
Q9ULH1	ASAP1 DDEF1 KIAA1249	Arf-GAP with SH3 domain, ANK repeat and PH domain-containing protein 1 (130 kDa phosphatidylinositol 4,5-bisphosphate-dependent ARF1 GTPase-activating protein) (ADP-ribosylation factor-directed GTPase-activating protein 1) (ARF GTPase-activating protein 1) (Development and differentiation-enhancing factor 1) (DEF-1) (Differentiation-enhancing factor 1) (PIP2-dependent ARF1 GAP)
A0A0A0MRE5	ASAP1 DDEF1 hCG_2009092	Arf-GAP with SH3 domain, ANK repeat and PH domain-containing protein 1 (Development and differentiation enhancing factor 1, isoform CRA_b)
H0YBF7	ASAP1	Arf-GAP with SH3 domain, ANK repeat and PH domain-containing protein 1 (Fragment)
O43150	ASAP2 DDEF2 KIAA0400	Arf-GAP with SH3 domain, ANK repeat and PH domain-containing protein 2 (Development and differentiation-enhancing factor 2) (Paxillin-associated protein with ARF GAP activity 3) (PAG3) (Pyk2 C-terminus-associated protein) (PAP)
Q8TDY4	ASAP3 DDEFL1 UPLC1	Arf-GAP with SH3 domain, ANK repeat and PH domain-containing protein 3 (Development and differentiation-enhancing factor-like 1) (Protein up-regulated in liver cancer 1)
A0A087WXS7	ASNA1	ATPase ASNA1 (EC 3.6.-.-) (Arsenical pump-driving ATPase) (Arsenite-stimulated ATPase)
O43681	ASNA1 ARSA TRC40	ATPase ASNA1 (EC 3.6.-.-) (Arsenical pump-driving ATPase) (Arsenite-stimulated ATPase) (Transmembrane domain recognition complex 40 kDa ATPase subunit) (hARSA-I) (hASNA-I)
Q96S55	WRNIP1 WHIP	ATPase WRNIP1 (EC 3.6.1.3) (Werner helicase-interacting protein 1)
Q96TA2	YME1L1 FTSH1 YME1L UNQ1868/PRO4304	ATP-dependent zinc metalloprotease YME1L1 (EC 3.4.24.-) (ATP-dependent metalloprotease FtsH1) (Meg-4) (Presenilin-associated metalloprotease) (PAMP) (YME1-like protein 1)
B3VCF5	CHN2	Beta chimaerin isoform B1-CHNdel ex10-11 (Beta-chimaerin)
B3VCF6	CHN2	Beta chimaerin isoform B1-CHNdel ex11-12 (Beta-chimaerin)
P52757	CHN2 ARHGAP3 BCH	Beta-chimaerin (Beta-chimerin) (Rho GTPase-activating protein 3)
H7C0V3	CHN2	Beta-chimaerin (Fragment)
P54132	BLM RECQ2 RECQL3	Bloom syndrome protein (EC 3.6.4.12) (DNA helicase, RecQ-like type 2) (RecQ2) (RecQ protein-like 3)
O95628	CNOT4 NOT4	CCR4-NOT transcription complex subunit 4 (EC 2.3.2.27) (CCR4-associated factor 4) (E3 ubiquitin-protein ligase CNOT4) (Potential transcriptional repressor NOT4Hp) (RING-type E3 ubiquitin transferase CNOT4)
B7Z934	EBF2	cDNA FLJ55302, highly similar to Transcription factor COE2
B7Z493	FGD4	cDNA FLJ55905, highly similar to FYVE, RhoGEF and PH domain-containing protein 4
Q12873	CHD3	Chromodomain-helicase-DNA-binding protein 3 (CHD-3) (EC 3.6.4.12) (ATP-dependent helicase CHD3) (Mi-2 autoantigen 240 kDa protein) (Mi2-alpha) (Zinc finger helicase) (hZFH)
F5GWX5	CHD4	Chromodomain-helicase-DNA-binding protein 4
A0A0C4DGG9	CHD4	Chromodomain-helicase-DNA-binding protein 4
Q14839	CHD4	Chromodomain-helicase-DNA-binding protein 4 (CHD-4) (EC 3.6.4.12) (ATP-dependent helicase CHD4) (Mi-2 autoantigen 218 kDa protein) (Mi2-beta)
F2Z2R5	CHD5	Chromodomain-helicase-DNA-binding protein 5
Q8TDI0	CHD5 KIAA0444	Chromodomain-helicase-DNA-binding protein 5 (CHD-5) (EC 3.6.4.12) (ATP-dependent helicase CHD5)
O14578	CIT CRIK KIAA0949 STK21	Citron Rho-interacting kinase (CRIK) (EC 2.7.11.1) (Serine/threonine-protein kinase 21)
P51813	BMX	Cytoplasmic tyrosine-protein kinase BMX (EC 2.7.10.2) (Bone marrow tyrosine kinase gene in chromosome X protein) (Epithelial and endothelial tyrosine kinase) (ETK) (NTK38)
H0YA20	DGKQ	Diacylglycerol kinase (DAG kinase) (EC 2.7.1.107) (Fragment)
P23743	DGKA DAGK DAGK1	Diacylglycerol kinase alpha (DAG kinase alpha) (EC 2.7.1.107) (80 kDa diacylglycerol kinase) (Diglyceride kinase alpha) (DGK-alpha)
Q9Y6T7	DGKB DAGK2 KIAA0718	Diacylglycerol kinase beta (DAG kinase beta) (EC 2.7.1.107) (90 kDa diacylglycerol kinase) (Diglyceride kinase beta) (DGK-beta)
Q16760	DGKD KIAA0145	Diacylglycerol kinase delta (DAG kinase delta) (EC 2.7.1.107) (130 kDa diacylglycerol kinase) (Diglyceride kinase delta) (DGK-delta)
P52429	DGKE DAGK5	Diacylglycerol kinase epsilon (DAG kinase epsilon) (EC 2.7.1.107) (Diglyceride kinase epsilon) (DGK-epsilon)
Q86XP1	DGKH	Diacylglycerol kinase eta (DAG kinase eta) (EC 2.7.1.107) (Diglyceride kinase eta) (DGK-eta)
P49619	DGKG DAGK3	Diacylglycerol kinase gamma (DAG kinase gamma) (EC 2.7.1.107) (Diglyceride kinase gamma) (DGK-gamma)
H7C0L0	DGKG	Diacylglycerol kinase gamma (Fragment)
O75912	DGKI	Diacylglycerol kinase iota (DAG kinase iota) (EC 2.7.1.107) (Diglyceride kinase iota) (DGK-iota)
Q5KSL6	DGKK	Diacylglycerol kinase kappa (DAG kinase kappa) (EC 2.7.1.107) (142 kDa diacylglycerol kinase) (Diglyceride kinase kappa) (DGK-kappa)
P52824	DGKQ DAGK4	Diacylglycerol kinase theta (DAG kinase theta) (EC 2.7.1.107) (Diglyceride kinase theta) (DGK-theta)
Q13574	DGKZ DAGK6	Diacylglycerol kinase zeta (DAG kinase zeta) (EC 2.7.1.107) (Diglyceride kinase zeta) (DGK-zeta)
Q6ZN54	DEF8	Differentially expressed in FDCP 8 homolog (DEF-8)
Q5FWF4	ZRANB3	DNA annealing helicase and endonuclease ZRANB3 (Annealing helicase 2) (AH2) (Zinc finger Ran-binding domain-containing protein 3) [Includes: DNA annealing helicase ZRANB3 (EC 3.6.4.-); Endonuclease ZRANB3 (EC 3.1.-.-)]
P49792	RANBP2 NUP358	E3 SUMO-protein ligase RanBP2 (EC 2.3.2.-) (358 kDa nucleoporin) (Nuclear pore complex protein Nup358) (Nucleoporin Nup358) (Ran-binding protein 2) (RanBP2) (p270)
Q96EP1	CHFR RNF196	E3 ubiquitin-protein ligase CHFR (EC 2.3.2.27) (Checkpoint with forkhead and RING finger domains protein) (RING finger protein 196) (RING-type E3 ubiquitin transferase CHFR)
Q86YT6	MIB1 DIP1 KIAA1323 ZZANK2	E3 ubiquitin-protein ligase MIB1 (EC 2.3.2.27) (DAPK-interacting protein 1) (DIP-1) (Mind bomb homolog 1) (RING-type E3 ubiquitin transferase MIB1) (Zinc finger ZZ type with ankyrin repeat domain protein 2)
E9PD12	MIB2	E3 ubiquitin-protein ligase MIB2
F2Z2L2	MIB2	E3 ubiquitin-protein ligase MIB2
D6RAZ0	MIB2	E3 ubiquitin-protein ligase MIB2
Q96AX9	MIB2 SKD ZZANK1	E3 ubiquitin-protein ligase MIB2 (EC 2.3.2.27) (Mind bomb homolog 2) (Novel zinc finger protein) (Novelzin) (Putative NF-kappa-B-activating protein 002N) (RING-type E3 ubiquitin transferase MIB2) (Skeletrophin) (Zinc finger ZZ type with ankyrin repeat domain protein 1)
H0YAM8	MIB2	E3 ubiquitin-protein ligase MIB2 (Fragment)
O76064	RNF8 KIAA0646	E3 ubiquitin-protein ligase RNF8 (hRNF8) (EC 2.3.2.27) (RING finger protein 8) (RING-type E3 ubiquitin transferase RNF8)
Q149N8	SHPRH KIAA2023	E3 ubiquitin-protein ligase SHPRH (EC 2.3.2.27) (EC 3.6.4.-) (RING-type E3 ubiquitin transferase SHPRH) (SNF2, histone-linker, PHD and RING finger domain-containing helicase)
A0A0D9SFM0	SHPRH hCG_18061	E3 ubiquitin-protein ligase SHPRH (SNF2 histone linker PHD RING helicase, isoform CRA_a)
P36406	TRIM23 ARD1 ARFD1 RNF46	E3 ubiquitin-protein ligase TRIM23 (EC 2.3.2.27) (ADP-ribosylation factor domain-containing protein 1) (GTP-binding protein ARD-1) (RING finger protein 46) (RING-type E3 ubiquitin transferase TRIM23) (Tripartite motif-containing protein 23)
C9JGE3	EWSR1	EWS RNA-binding protein variant 6 (RNA-binding protein EWS)
B7ZM68	FGD5	FGD5 protein (FYVE, RhoGEF and PH domain-containing protein 5)
P98174	FGD1 FGDY ZFYVE3	FYVE, RhoGEF and PH domain-containing protein 1 (Faciogenital dysplasia 1 protein) (Rho/Rac guanine nucleotide exchange factor FGD1) (Rho/Rac GEF) (Zinc finger FYVE domain-containing protein 3)
Q7Z6J4	FGD2 ZFYVE4	FYVE, RhoGEF and PH domain-containing protein 2 (Zinc finger FYVE domain-containing protein 4)
Q5JSP0	FGD3 ZFYVE5	FYVE, RhoGEF and PH domain-containing protein 3 (Zinc finger FYVE domain-containing protein 5)
E9PJX4	FGD4	FYVE, RhoGEF and PH domain-containing protein 4
F8VWL3	FGD4	FYVE, RhoGEF and PH domain-containing protein 4
F8W1R0	FGD4	FYVE, RhoGEF and PH domain-containing protein 4
Q96M96	FGD4 FRABP ZFYVE6	FYVE, RhoGEF and PH domain-containing protein 4 (Actin filament-binding protein frabin) (FGD1-related F-actin-binding protein) (Zinc finger FYVE domain-containing protein 6)
Q6ZNL6	FGD5 ZFYVE23	FYVE, RhoGEF and PH domain-containing protein 5 (Zinc finger FYVE domain-containing protein 23)
F8VQX5	FGD6	FYVE, RhoGEF and PH domain-containing protein 6 (Fragment)
Q6ZV73	FGD6 KIAA1362 ZFYVE24	FYVE, RhoGEF and PH domain-containing protein 6 (Zinc finger FYVE domain-containing protein 24)
Q9P107	GMIP	GEM-interacting protein (GMIP)
P52735	VAV2	Guanine nucleotide exchange factor VAV2 (VAV-2)
Q9UKW4	VAV3	Guanine nucleotide exchange factor VAV3 (VAV-3)
Q14527	HLTF HIP116A RNF80 SMARCA3 SNF2L3 ZBU1	Helicase-like transcription factor (EC 2.3.2.27) (EC 3.6.4.-) (DNA-binding protein/plasminogen activator inhibitor 1 regulator) (HIP116) (RING finger protein 80) (RING-type E3 ubiquitin transferase HLTF) (SWI/SNF-related matrix-associated actin-dependent regulator of chromatin subfamily A member 3) (Sucrose nonfermenting protein 2-like 3)
H7C5K0	HLTF	Helicase-like transcription factor (Fragment)
A0A0C4DGA6	HLTF SMARCA3 hCG_21212	Helicase-like transcription factor (SWI/SNF related, matrix associated, actin dependent regulator of chromatin, subfamily a, member 3, isoform CRA_c)
Q9H9B1	EHMT1 EUHMTASE1 GLP KIAA1876 KMT1D	Histone-lysine N-methyltransferase EHMT1 (EC 2.1.1.-) (EC 2.1.1.43) (Euchromatic histone-lysine N-methyltransferase 1) (Eu-HMTase1) (G9a-like protein 1) (GLP) (GLP1) (Histone H3-K9 methyltransferase 5) (H3-K9-HMTase 5) (Lysine N-methyltransferase 1D)
E9PMV2	HLA-DQA1	HLA class II histocompatibility antigen, DQ alpha 1 chain (Fragment)
Q9BYX4	IFIH1 MDA5 RH116	Interferon-induced helicase C domain-containing protein 1 (EC 3.6.4.13) (Clinically amyopathic dermatomyositis autoantigen 140 kDa) (CADM-140 autoantigen) (Helicase with 2 CARD domains) (Helicard) (Interferon-induced with helicase C domain protein 1) (Melanoma differentiation-associated protein 5) (MDA-5) (Murabutide down-regulated protein) (RIG-I-like receptor 2) (RLR-2) (RNA helicase-DEAD box p…
P09923	ALPI	Intestinal-type alkaline phosphatase (IAP) (Intestinal alkaline phosphatase) (EC 3.1.3.1)
Q8IVT5	KSR1 KSR	Kinase suppressor of Ras 1
A0A0A0MQW1	KSR1	Kinase suppressor of Ras 1
E9PB13	KSR2	Kinase suppressor of Ras 2
Q6VAB6	KSR2	Kinase suppressor of Ras 2 (hKSR2) (EC 2.7.11.1)
E9PC47	LIMK1	LIM domain kinase 1
P53667	LIMK1 LIMK	LIM domain kinase 1 (LIMK-1) (EC 2.7.11.1)
B5MC51	LIMK2	LIM domain kinase 2
P53671	LIMK2	LIM domain kinase 2 (LIMK-2) (EC 2.7.11.1)
Q9HBH9	MKNK2 GPRK7 MNK2	MAP kinase-interacting serine/threonine-protein kinase 2 (EC 2.7.11.1) (MAP kinase signal-integrating kinase 2) (MAPK signal-integrating kinase 2) (Mnk2)
P08582	MELTF MAP97 MFI2	Melanotransferrin (Melanoma-associated antigen p97) (CD antigen CD228)
Q13233	MAP3K1 MAPKKK1 MEKK MEKK1	Mitogen-activated protein kinase kinase kinase 1 (EC 2.7.11.25) (MAPK/ERK kinase kinase 1) (MEK kinase 1) (MEKK 1)
B8ZZ96	CHN1	N-chimaerin
P15882	CHN1 ARHGAP2 CHN	N-chimaerin (A-chimaerin) (Alpha-chimerin) (N-chimerin) (NC) (Rho GTPase-activating protein 2)
C9J1N1	CHN1	N-chimaerin (Fragment)
C9J3V9	CHN1	N-chimaerin (Fragment)
C9JR98	CHN1	N-chimaerin (Fragment)
Q14596	NBR1 1A13B KIAA0049 M17S2 MIG19	Next to BRCA1 gene 1 protein (Cell migration-inducing gene 19 protein) (Membrane component chromosome 17 surface marker 2) (Neighbor of BRCA1 gene 1 protein) (Protein 1A1-3B)
A0A0A0MRJ0	CDC42BPA	Non-specific serine/threonine protein kinase (EC 2.7.11.1)
Q9UQ90	SPG7 CAR CMAR PGN	Paraplegin (EC 3.4.24.-) (Cell matrix adhesion regulator) (Spastic paraplegia 7 protein)
Q8NEN9	PDZD8 PDZK8	PDZ domain-containing protein 8 (Sarcoma antigen NY-SAR-84/NY-SAR-104)
Q96S99	PLEKHF1 APPD LAPF ZFYVE15	Pleckstrin homology domain-containing family F member 1 (PH domain-containing family F member 1) (Lysosome-associated apoptosis-inducing protein containing PH and FYVE domains) (Apoptosis-inducing protein) (PH and FYVE domain-containing protein 1) (Phafin-1) (Zinc finger FYVE domain-containing protein 15)
Q9H8W4	PLEKHF2 ZFYVE18	Pleckstrin homology domain-containing family F member 2 (PH domain-containing family F member 2) (Endoplasmic reticulum-associated apoptosis-involved protein containing PH and FYVE domains) (EAPF) (PH and FYVE domain-containing protein 2) (Phafin-2) (Phafin2) (Zinc finger FYVE domain-containing protein 18)
Q6ZWE6	PLEKHM3 DAPR PLEKHM1L	Pleckstrin homology domain-containing family M member 3 (PH domain-containing family M member 3) (Differentiation associated protein)
Q9NW64	RBM22 ZC3H16 199G4	Pre-mRNA-splicing factor RBM22 (RNA-binding motif protein 22) (Zinc finger CCCH domain-containing protein 16)
Q9UJV9	DDX41 ABS	Probable ATP-dependent RNA helicase DDX41 (EC 3.6.4.13) (DEAD box protein 41) (DEAD box protein abstrakt homolog)
A2A376	DDX58	Probable ATP-dependent RNA helicase DDX58
O95786	DDX58	Probable ATP-dependent RNA helicase DDX58 (EC 3.6.4.13) (DEAD box protein 58) (RIG-I-like receptor 1) (RLR-1) (Retinoic acid-inducible gene 1 protein) (RIG-1) (Retinoic acid-inducible gene I protein) (RIG-I)
Q5T1V6	DDX59 ZNHIT5	Probable ATP-dependent RNA helicase DDX59 (EC 3.6.4.13) (DEAD box protein 59) (Zinc finger HIT domain-containing protein 5)
Q96C10	DHX58 D11LGP2E LGP2	Probable ATP-dependent RNA helicase DHX58 (EC 3.6.4.13) (Probable ATP-dependent helicase LGP2) (Protein D11Lgp2 homolog) (RIG-I-like receptor 3) (RLR-3) (RIG-I-like receptor LGP2) (RLR)
A0A087X0I9	PRKCQ	Protein kinase C (EC 2.7.11.13)
J3KRN5	PRKCA	Protein kinase C alpha type
J3KN97	PRKCA	Protein kinase C alpha type (Fragment)
P17252	PRKCA PKCA PRKACA	Protein kinase C alpha type (PKC-A) (PKC-alpha) (EC 2.7.11.13)
P05771	PRKCB PKCB PRKCB1	Protein kinase C beta type (PKC-B) (PKC-beta) (EC 2.7.11.13)
Q05655	PRKCD	Protein kinase C delta type (EC 2.7.11.13) (Tyrosine-protein kinase PRKCD) (EC 2.7.10.2) (nPKC-delta) [Cleaved into: Protein kinase C delta type regulatory subunit; Protein kinase C delta type catalytic subunit (Sphingosine-dependent protein kinase-1) (SDK1)]
C9K0E3	PRKCD	Protein kinase C delta type (Fragment)
Q02156	PRKCE PKCE	Protein kinase C epsilon type (EC 2.7.11.13) (nPKC-epsilon)
P24723	PRKCH PKCL PRKCL	Protein kinase C eta type (EC 2.7.11.13) (PKC-L) (nPKC-eta)
G3V4Q6	PRKCH	Protein kinase C eta type (Fragment)
G3V4Q9	PRKCH	Protein kinase C eta type (Fragment)
G3V4X4	PRKCH	Protein kinase C eta type (Fragment)
G3V5U5	PRKCH	Protein kinase C eta type (Fragment)
G3V304	PRKCH	Protein kinase C eta type (Fragment)
P05129	PRKCG PKCG	Protein kinase C gamma type (PKC-gamma) (EC 2.7.11.13)
P41743	PRKCI DXS1179E	Protein kinase C iota type (EC 2.7.11.13) (Atypical protein kinase C-lambda/iota) (PRKC-lambda/iota) (aPKC-lambda/iota) (nPKC-iota)
Q04759	PRKCQ PRKCT	Protein kinase C theta type (EC 2.7.11.13) (nPKC-theta)
Q05513	PRKCZ PKC2	Protein kinase C zeta type (EC 2.7.11.13) (nPKC-zeta)
F2Z3C5	PRKCZ	Protein kinase C zeta type (Fragment)
Q9Y6V0	PCLO ACZ KIAA0559	Protein piccolo (Aczonin)
F8W0P6	UNC13A	Protein unc-13 homolog A
F8VZH8	UNC13A	Protein unc-13 homolog A
F8W059	UNC13A	Protein unc-13 homolog A
Q9UPW8	UNC13A KIAA1032	Protein unc-13 homolog A (Munc13-1)
A0A1B0GVW8	UNC13B	Protein unc-13 homolog B
A0A1B0GUS7	UNC13B	Protein unc-13 homolog B
F8W8M9	UNC13B	Protein unc-13 homolog B
B1AM27	UNC13B	Protein unc-13 homolog B
O14795	UNC13B UNC13	Protein unc-13 homolog B (Munc13-2) (munc13)
I6L9J0	UNC13B	Protein unc-13 homolog B (UNC13B protein)
Q8NB66	UNC13C	Protein unc-13 homolog C (Munc13-3)
P15498	VAV1 VAV	Proto-oncogene vav
A0A0A0MR07	VAV1	Proto-oncogene vav
F5H5P4	VAV1	Proto-oncogene vav
Q96D37	VAV1	Proto-oncogene vav (VAV1 protein)
Q5VUJ5	AGAP7P AGAP7 CTGLF4	Putative Arf-GAP with GTPase, ANK repeat and PH domain-containing protein 7 (AGAP-7) (Arf-GAP with GTPase, ANK repeat and PH domain-containing protein 7 pseudogene) (Centaurin-gamma-like family member 4)
Q6P158	DHX57	Putative ATP-dependent RNA helicase DHX57 (EC 3.6.4.13) (DEAH box protein 57)
Q9P2R3	ANKFY1 ANKHZN KIAA1255	Rabankyrin-5 (Rank-5) (Ankyrin repeat and FYVE domain-containing protein 1) (Ankyrin repeats hooked to a zinc finger motif)
F8VP47	RPH3A	Rabphilin-3A
Q9Y2J0	RPH3A KIAA0985	Rabphilin-3A (Exophilin-1)
Q9H0H5	RACGAP1 KIAA1478 MGCRACGAP	Rac GTPase-activating protein 1 (Male germ cell RacGap) (MgcRacGAP) (Protein CYK4 homolog) (CYK4) (HsCYK-4)
P04049	RAF1 RAF	RAF proto-oncogene serine/threonine-protein kinase (EC 2.7.11.1) (Proto-oncogene c-RAF) (cRaf) (Raf-1)
H7C155	RAF1	RAF proto-oncogene serine/threonine-protein kinase (Fragment)
A0A075B763	RASSF5	Ras association domain-containing protein 5
Q8WWW0	RASSF5 NORE1 RAPL	Ras association domain-containing protein 5 (New ras effector 1) (Regulator for cell adhesion and polarization enriched in lymphoid tissues) (RAPL)
A0A0A0MSJ9	RASA2	Ras GTPase-activating protein 2
Q15283	RASA2 GAP1M RASGAP	Ras GTPase-activating protein 2 (GTPase-activating protein 1m) (GAP1m)
Q14644	RASA3	Ras GTPase-activating protein 3 (GAP1(IP4BP)) (Ins P4-binding protein)
E7ERK1	RASA4	Ras GTPase-activating protein 4
O43374	RASA4 CAPRI GAPL KIAA0538	Ras GTPase-activating protein 4 (Calcium-promoted Ras inactivator) (Ras p21 protein activator 4) (RasGAP-activating-like protein 2)
C9J798	RASA4B	Ras GTPase-activating protein 4B
F5GXT2	RASA4B	Ras GTPase-activating protein 4B
F8W6L0	RASA4B	Ras GTPase-activating protein 4B
H0YKM0	RASGRP1	RAS guanyl-releasing protein 1
F5H514	RASGRP1	RAS guanyl-releasing protein 1
O95267	RASGRP1 RASGRP	RAS guanyl-releasing protein 1 (Calcium and DAG-regulated guanine nucleotide exchange factor II) (CalDAG-GEFII) (Ras guanyl-releasing protein)
H0YMF3	RASGRP1	RAS guanyl-releasing protein 1 (Fragment)
Q7LDG7	RASGRP2 CDC25L MCG7	RAS guanyl-releasing protein 2 (Calcium and DAG-regulated guanine nucleotide exchange factor I) (CalDAG-GEFI) (Cdc25-like protein) (hCDC25L) (F25B3.3 kinase-like protein)
Q8IV61	RASGRP3 GRP3 KIAA0846	Ras guanyl-releasing protein 3 (Calcium and DAG-regulated guanine nucleotide exchange factor III) (Guanine nucleotide exchange factor for Rap1)
Q8TDF6	RASGRP4	RAS guanyl-releasing protein 4
O95294	RASAL1 RASAL	RasGAP-activating-like protein 1 (RAS protein activator like 1) (Ras GTPase-activating-like protein)
Q86UR5	RIMS1 KIAA0340 RAB3IP2 RIM1 Nbla00761	Regulating synaptic membrane exocytosis protein 1 (Rab-3-interacting molecule 1) (RIM 1) (Rab-3-interacting protein 2)
A0A0J9YWD4	RIMS2	Regulating synaptic membrane exocytosis protein 2 (Fragment)
Q9UQ26	RIMS2 KIAA0751 RAB3IP3 RIM2	Regulating synaptic membrane exocytosis protein 2 (Rab-3-interacting molecule 2) (RIM 2) (Rab-3-interacting protein 3)
F8VWZ8	ARHGAP29	Rho GTPase-activating protein 29
Q52LW3	ARHGAP29 PARG1	Rho GTPase-activating protein 29 (PTPL1-associated RhoGAP protein 1) (Rho-type GTPase-activating protein 29)
K7ES92	ARHGAP45	Rho GTPase-activating protein 45
F5H1R4	ARHGAP45	Rho GTPase-activating protein 45
K7EM85	ARHGAP45	Rho GTPase-activating protein 45
K7ES98	ARHGAP45	Rho GTPase-activating protein 45
Q92619	ARHGAP45 HMHA1 KIAA0223	Rho GTPase-activating protein 45 [Cleaved into: Minor histocompatibility antigen HA-1 (mHag HA-1)]
A0A087WZG4	ARHGEF18	Rho guanine nucleotide exchange factor 18 (Fragment)
Q8N1W1	ARHGEF28 KIAA1998 RGNEF	Rho guanine nucleotide exchange factor 28 (190 kDa guanine nucleotide exchange factor) (p190-RhoGEF) (p190RhoGEF) (Rho guanine nucleotide exchange factor)
Q13464	ROCK1	Rho-associated protein kinase 1 (EC 2.7.11.1) (Renal carcinoma antigen NY-REN-35) (Rho-associated, coiled-coil-containing protein kinase 1) (Rho-associated, coiled-coil-containing protein kinase I) (ROCK-I) (p160 ROCK-1) (p160ROCK)
E9PF63	ROCK2	Rho-associated protein kinase 2
O75116	ROCK2 KIAA0619	Rho-associated protein kinase 2 (EC 2.7.11.1) (Rho kinase 2) (Rho-associated, coiled-coil-containing protein kinase 2) (Rho-associated, coiled-coil-containing protein kinase II) (ROCK-II) (p164 ROCK-2)
Q9ULX5	RNF112 BFP ZNF179	RING finger protein 112 (EC 2.3.2.27) (Brain finger protein) (Zinc finger protein 179)
P98175	RBM10 DXS8237E GPATC9 GPATCH9 KIAA0122	RNA-binding protein 10 (G patch domain-containing protein 9) (RNA-binding motif protein 10) (RNA-binding protein S1-1) (S1-1)
Q9BWF3	RBM4 RBM4A	RNA-binding protein 4 (Lark homolog) (hLark) (RNA-binding motif protein 4) (RNA-binding motif protein 4a)
Q9BQ04	RBM4B RBM30	RNA-binding protein 4B (RNA-binding motif protein 30) (RNA-binding motif protein 4B) (RNA-binding protein 30)
P52756	RBM5 H37 LUCA15	RNA-binding protein 5 (Protein G15) (Putative tumor suppressor LUCA15) (RNA-binding motif protein 5) (Renal carcinoma antigen NY-REN-9)
A0A0D9SFL3	EWSR1	RNA-binding protein EWS
B0QYK0	EWSR1	RNA-binding protein EWS
Q01844	EWSR1 EWS	RNA-binding protein EWS (EWS oncogene) (Ewing sarcoma breakpoint region 1 protein)
H3BPE7	FUS	RNA-binding protein FUS
P35637	FUS TLS	RNA-binding protein FUS (75 kDa DNA-pairing protein) (Oncogene FUS) (Oncogene TLS) (POMp75) (Translocated in liposarcoma protein)
E7EMC7	SQSTM1	Sequestosome-1
Q13501	SQSTM1 ORCA OSIL	Sequestosome-1 (EBI3-associated protein of 60 kDa) (EBIAP) (p60) (Phosphotyrosine-independent ligand for the Lck SH2 domain of 62 kDa) (Ubiquitin-binding protein p62)
E3W990	SQSTM1	Sequestosome-1 (Fragment)
Q16629	SRSF7 SFRS7	Serine/arginine-rich splicing factor 7 (Splicing factor 9G8) (Splicing factor, arginine/serine-rich 7)
C9JAB2	SRSF7	Serine/arginine-rich-splicing factor 7
A0A0B4J1Z1	SRSF7 SFRS7 hCG_15878	Serine/arginine-rich-splicing factor 7 (Splicing factor, arginine/serine-rich 7, 35kDa, isoform CRA_a)
F8WBA3	PRKD1	Serine/threonine-protein kinase (EC 2.7.11.13)
P10398	ARAF ARAF1 PKS PKS2	Serine/threonine-protein kinase A-Raf (EC 2.7.11.1) (Proto-oncogene A-Raf) (Proto-oncogene A-Raf-1) (Proto-oncogene Pks)
H7C560	BRAF	Serine/threonine-protein kinase B-raf
P15056	BRAF BRAF1 RAFB1	Serine/threonine-protein kinase B-raf (EC 2.7.11.1) (Proto-oncogene B-Raf) (p94) (v-Raf murine sarcoma viral oncogene homolog B1)
Q15139	PRKD1 PKD PKD1 PRKCM	Serine/threonine-protein kinase D1 (EC 2.7.11.13) (Protein kinase C mu type) (Protein kinase D) (nPKC-D1) (nPKC-mu)
F8VZ98	PRKD1	Serine/threonine-protein kinase D1 (Fragment)
Q9BZL6	PRKD2 PKD2 HSPC187	Serine/threonine-protein kinase D2 (EC 2.7.11.13) (nPKC-D2)
O94806	PRKD3 EPK2 PRKCN	Serine/threonine-protein kinase D3 (EC 2.7.11.13) (Protein kinase C nu type) (Protein kinase EPK2) (nPKC-nu)
C9JKP8	PRKD3	Serine/threonine-protein kinase D3 (Fragment)
A0A0A0MRJ1	CDC42BPA	Serine/threonine-protein kinase MRCK alpha
Q5VT25	CDC42BPA KIAA0451	Serine/threonine-protein kinase MRCK alpha (EC 2.7.11.1) (CDC42-binding protein kinase alpha) (DMPK-like alpha) (Myotonic dystrophy kinase-related CDC42-binding kinase alpha) (MRCK alpha) (Myotonic dystrophy protein kinase-like alpha)
H0Y6V3	CDC42BPA	Serine/threonine-protein kinase MRCK alpha (Fragment)
Q9Y5S2	CDC42BPB KIAA1124	Serine/threonine-protein kinase MRCK beta (EC 2.7.11.1) (CDC42-binding protein kinase beta) (CDC42BP-beta) (DMPK-like beta) (Myotonic dystrophy kinase-related CDC42-binding kinase beta) (MRCK beta) (Myotonic dystrophy protein kinase-like beta)
H0YLY0	CDC42BPB	Serine/threonine-protein kinase MRCK beta (Fragment)
Q6DT37	CDC42BPG DMPK2	Serine/threonine-protein kinase MRCK gamma (EC 2.7.11.1) (CDC42-binding protein kinase gamma) (DMPK-like gamma) (Myotonic dystrophy kinase-related CDC42-binding kinase gamma) (MRCK gamma) (MRCKG) (Myotonic dystrophy protein kinase-like gamma) (Myotonic dystrophy protein kinase-like alpha)
Q99469	STAC STAC1	SH3 and cysteine-rich domain-containing protein (Src homology 3 and cysteine-rich domain-containing protein)
Q6ZMT1	STAC2	SH3 and cysteine-rich domain-containing protein 2 (24b2/STAC2) (Src homology 3 and cysteine-rich domain-containing protein 2)
Q96MF2	STAC3	SH3 and cysteine-rich domain-containing protein 3
Q9H6E5	TUT1 RBM21	Speckle targeted PIP5K1A-regulated poly(A) polymerase (Star-PAP) (EC 2.7.7.19) (RNA-binding motif protein 21) (RNA-binding protein 21) (U6 snRNA-specific terminal uridylyltransferase 1) (U6-TUTase) (EC 2.7.7.52)
Q8WU68	U2AF1L4 U2AF1-RS3 U2AF1L3	Splicing factor U2AF 26 kDa subunit (U2 auxiliary factor 26) (U2 small nuclear RNA auxiliary factor 1-like protein 4) (U2AF1-like 4) (U2(RNU2) small nuclear RNA auxiliary factor 1-like protein 3) (U2 small nuclear RNA auxiliary factor 1-like protein 3) (U2AF1-like protein 3)
Q01081	U2AF1 U2AF35 U2AFBP FP793	Splicing factor U2AF 35 kDa subunit (U2 auxiliary factor 35 kDa subunit) (U2 small nuclear RNA auxiliary factor 1) (U2 snRNP auxiliary factor small subunit)
P0DN76	U2AF1L5	Splicing factor U2AF 35 kDa subunit-like protein (U2 small nuclear RNA auxiliary factor 1-like protein 5)
Q8IYB5	SMAP1	Stromal membrane-associated protein 1
A0A087X1X9	SMAP1	Stromal membrane-associated protein 1
A0A087WV97	SMAP2	Stromal membrane-associated protein 2
X6RCC3	SMAP2	Stromal membrane-associated protein 2 (Fragment)
Q8WU79	SMAP2 SMAP1L	Stromal membrane-associated protein 2 (Stromal membrane-associated protein 1-like)
Q96C24	SYTL4	Synaptotagmin-like protein 4 (Exophilin-2) (Granuphilin)
Q8TDW5	SYTL5 SLP5	Synaptotagmin-like protein 5
O95271	TNKS PARP5A PARPL TIN1 TINF1 TNKS1	Tankyrase-1 (TANK1) (EC 2.4.2.30) (ADP-ribosyltransferase diphtheria toxin-like 5) (ARTD5) (Poly [ADP-ribose] polymerase 5A) (TNKS-1) (TRF1-interacting ankyrin-related ADP-ribose polymerase) (Tankyrase I)
Q9H2K2	TNKS2 PARP5B TANK2 TNKL	Tankyrase-2 (TANK2) (EC 2.4.2.30) (ADP-ribosyltransferase diphtheria toxin-like 6) (ARTD6) (Poly [ADP-ribose] polymerase 5B) (TNKS-2) (TRF1-interacting ankyrin-related ADP-ribose polymerase 2) (Tankyrase II) (Tankyrase-like protein) (Tankyrase-related protein)
A0A075B7D9	TAF15	TATA-binding protein-associated factor 2N
Q92804	TAF15 RBP56 TAF2N	TATA-binding protein-associated factor 2N (68 kDa TATA-binding protein-associated factor) (TAF(II)68) (TAFII68) (RNA-binding protein 56)
D2IYK5	TCF19 hCG_25998	TCF19 (Transcription factor 19 isoform 2)
A0A0G2JIJ7	TCF19	TCF19 (Transcription factor 19)
F8VV64	TNS2	Tensin-2
Q63HR2	TNS2 KIAA1075 TENC1	Tensin-2 (EC 3.1.3.-) (C1 domain-containing phosphatase and tensin homolog) (C1-TEN) (Tensin-like C1 domain-containing phosphatase)
Q9Y242	TCF19 SC1	Transcription factor 19 (TCF-19) (Transcription factor SC1)
A0A087WTE5	EBF1	Transcription factor COE1
E5RFQ1	EBF1	Transcription factor COE1
Q9UH73	EBF1 COE1 EBF	Transcription factor COE1 (O/E-1) (OE-1) (Early B-cell factor)
Q9HAK2	EBF2 COE2	Transcription factor COE2 (Early B-cell factor 2) (EBF-2)
Q9H4W6	EBF3 COE3	Transcription factor COE3 (Early B-cell factor 3) (EBF-3) (Olf-1/EBF-like 2) (O/E-2) (OE-2)
E9PEI2	EBF4	Transcription factor COE4
A0A0A0MSW2	EBF4	Transcription factor COE4
Q9BQW3	EBF4 COE4 KIAA1442	Transcription factor COE4 (Early B-cell factor 4) (EBF-4) (Olf-1/EBF-like 4) (O/E-4) (OE-4)
X6R549	EBF4	Transcription factor COE4 (Fragment)
P46100	ATRX RAD54L XH2	Transcriptional regulator ATRX (EC 3.6.4.12) (ATP-dependent helicase ATRX) (X-linked helicase II) (X-linked nuclear protein) (XNP) (Znf-HX)
U3NG26	BTK	Tyrosine-protein kinase (EC 2.7.10.2)
Q5JY90	BTK hCG_20400	Tyrosine-protein kinase (EC 2.7.10.2)
Q06187	BTK AGMX1 ATK BPK	Tyrosine-protein kinase BTK (EC 2.7.10.2) (Agammaglobulinemia tyrosine kinase) (ATK) (B-cell progenitor kinase) (BPK) (Bruton tyrosine kinase)
Q08881	ITK EMT LYK	Tyrosine-protein kinase ITK/TSK (EC 2.7.10.2) (Interleukin-2-inducible T-cell kinase) (IL-2-inducible T-cell kinase) (Kinase EMT) (T-cell-specific kinase) (Tyrosine-protein kinase Lyk)
P42680	TEC PSCTK4	Tyrosine-protein kinase Tec (EC 2.7.10.2)
Q15695	ZRSR1 U2AF1-RS1 U2AF1L1 U2AF1P U2AF1RS1 U2AFBPL	U2 small nuclear ribonucleoprotein auxiliary factor 35 kDa subunit-related protein 1 (CCCH type zinc finger, RNA-binding motif and serine/arginine rich protein 1) (U2(RNU2) small nuclear RNA auxiliary factor 1-like 1)
Q15696	ZRSR2 U2AF1-RS2 U2AF1L2 U2AF1RS2 URP	U2 small nuclear ribonucleoprotein auxiliary factor 35 kDa subunit-related protein 2 (CCCH type zinc finger, RNA-binding motif and serine/arginine rich protein 2) (Renal carcinoma antigen NY-REN-20) (U2(RNU2) small nuclear RNA auxiliary factor 1-like 2) (U2AF35-related protein) (URP)
H3BRD5	MYO9A	Unconventional myosin-IXa
B2RTY4	MYO9A MYR7	Unconventional myosin-IXa (Unconventional myosin-9a)
M0R0P8	MYO9B	Unconventional myosin-IXb
Q13459	MYO9B MYR5	Unconventional myosin-IXb (Unconventional myosin-9b)
Q14191	WRN RECQ3 RECQL2	Werner syndrome ATP-dependent helicase (EC 3.6.4.12) (DNA helicase, RecQ-like type 3) (RecQ3) (Exonuclease WRN) (EC 3.1.-.-) (RecQ protein-like 2)
G3V1V1	ZCRB1 hCG_1818570	Zinc finger CCHC-type and RNA binding motif 1, isoform CRA_b (Zinc finger CCHC-type and RNA-binding motif-containing protein 1)
F8VXY6	ZCRB1	Zinc finger CCHC-type and RNA-binding motif-containing protein 1 (Fragment)
Q8TBF4	ZCRB1	Zinc finger CCHC-type and RNA-binding motif-containing protein 1 (U11/U12 small nuclear ribonucleoprotein 31 kDa protein) (U11/U12 snRNP 31 kDa protein) (U11/U12-31K)
Q14966	ZNF638 NP220 ZFML	Zinc finger protein 638 (Cutaneous T-cell lymphoma-associated antigen se33-1) (CTCL-associated antigen se33-1) (Nuclear protein 220) (Zinc finger matrin-like protein)

## Sheet: Ca_proteins in Aluminum
Entry	Gene names	Protein names
Q8IZ41	RASEF RAB45	Ras and EF-hand domain-containing protein (Ras-related protein Rab-45)
O14827	RASGRF2 GRF2	Ras-specific guanine nucleotide-releasing factor 2 (Ras-GRF2) (Ras guanine nucleotide exchange factor 2)
Q13884	SNTB1 SNT2B1	Beta-1-syntrophin (59 kDa dystrophin-associated protein A1 basic component 1) (DAPA1B) (BSYN2) (Syntrophin-2) (Tax interaction protein 43) (TIP-43)
Q6XYQ8	SYT10	Synaptotagmin-10 (Synaptotagmin X) (SytX)
O00445	SYT5	Synaptotagmin-5 (Synaptotagmin V) (SytV)
Q9H2B2	SYT4 KIAA1342	Synaptotagmin-4 (Synaptotagmin IV) (SytIV)
O43581	SYT7 PCANAP7	Synaptotagmin-7 (IPCA-7) (Prostate cancer-associated protein 7) (Synaptotagmin VII) (SytVII)
Q86SS6	SYT9	Synaptotagmin-9 (Synaptotagmin IX) (SytIX)
Q9BQG1	SYT3	Synaptotagmin-3 (Synaptotagmin III) (SytIII)
Q5T7P8	SYT6	Synaptotagmin-6 (Synaptotagmin VI) (SytVI)
Q13424	SNTA1 SNT1	Alpha-1-syntrophin (59 kDa dystrophin-associated protein A1 acidic component 1) (Pro-TGF-alpha cytoplasmic domain-interacting protein 1) (TACIP1) (Syntrophin-1)
Q8N9I0	SYT2	Synaptotagmin-2 (Synaptotagmin II) (SytII)
P21579	SYT1 SVP65 SYT	Synaptotagmin-1 (Synaptotagmin I) (SytI) (p65)
Q9BT88	SYT11 KIAA0080	Synaptotagmin-11 (Synaptotagmin XI) (SytXI)
P23634	ATP2B4 ATP2B2 MXRA1	Plasma membrane calcium-transporting ATPase 4 (PMCA4) (EC 3.6.3.8) (Matrix-remodeling-associated protein 1) (Plasma membrane calcium ATPase isoform 4) (Plasma membrane calcium pump isoform 4)
O75185	ATP2C2 KIAA0703 SPCA2	Calcium-transporting ATPase type 2C member 2 (ATPase 2C2) (EC 3.6.3.8) (Secretory pathway Ca(2+)-ATPase 2)
Q9ULU8	CADPS CAPS CAPS1 KIAA1121	Calcium-dependent secretion activator 1 (Calcium-dependent activator protein for secretion 1) (CAPS-1)
Q86YS7	C2CD5 CDP138 KIAA0528	C2 domain-containing protein 5 (C2 domain-containing phosphoprotein of 138 kDa)
Q86UW7	CADPS2 CAPS2 KIAA1591	Calcium-dependent secretion activator 2 (Calcium-dependent activator protein for secretion 2) (CAPS-2)
Q6P2M8	PNCK	Calcium/calmodulin-dependent protein kinase type 1B (EC 2.7.11.17) (CaM kinase I beta) (CaM kinase IB) (CaM-KI beta) (CaMKI-beta) (Pregnancy up-regulated non-ubiquitously-expressed CaM kinase)
Q8IU85	CAMK1D CAMKID	Calcium/calmodulin-dependent protein kinase type 1D (EC 2.7.11.17) (CaM kinase I delta) (CaM kinase ID) (CaM-KI delta) (CaMKI delta) (CaMKID) (CaMKI-like protein kinase) (CKLiK)
Q16566	CAMK4 CAMK CAMK-GR CAMKIV	Calcium/calmodulin-dependent protein kinase type IV (CaMK IV) (EC 2.7.11.17) (CaM kinase-GR)
Q9NZM3	ITSN2 KIAA1256 SH3D1B SWAP	Intersectin-2 (SH3 domain-containing protein 1B) (SH3P18) (SH3P18-like WASP-associated protein)
P05129	PRKCG PKCG	Protein kinase C gamma type (PKC-gamma) (EC 2.7.11.13)
P05771	PRKCB PKCB PRKCB1	Protein kinase C beta type (PKC-B) (PKC-beta) (EC 2.7.11.13)
Q15811	ITSN1 ITSN SH3D1A	Intersectin-1 (SH3 domain-containing protein 1A) (SH3P17)
Q9NQA5	TRPV5 ECAC1	Transient receptor potential cation channel subfamily V member 5 (TrpV5) (Calcium transport protein 2) (CaT2) (Epithelial calcium channel 1) (ECaC) (ECaC1) (Osm-9-like TRP channel 3) (OTRPC3)
Q8NET8	TRPV3	Transient receptor potential cation channel subfamily V member 3 (TrpV3) (Vanilloid receptor-like 3) (VRL-3)
Q8NER1	TRPV1 VR1	Transient receptor potential cation channel subfamily V member 1 (TrpV1) (Capsaicin receptor) (Osm-9-like TRP channel 1) (OTRPC1) (Vanilloid receptor 1)
Q9H1D0	TRPV6 ECAC2	Transient receptor potential cation channel subfamily V member 6 (TrpV6) (CaT-like) (CaT-L) (Calcium transport protein 1) (CaT1) (Epithelial calcium channel 2) (ECaC2)
Q9Y210	TRPC6 TRP6	Short transient receptor potential channel 6 (TrpC6) (Transient receptor protein 6) (TRP-6)
Q9HCX4	TRPC7 TRP7	Short transient receptor potential channel 7 (TrpC7) (Transient receptor protein 7) (TRP-7) (hTRP7)
Q9UL62	TRPC5 TRP5	Short transient receptor potential channel 5 (TrpC5) (Transient receptor protein 5) (TRP-5) (hTRP-5) (hTRP5)
Q9Y5S1	TRPV2 VRL	Transient receptor potential cation channel subfamily V member 2 (TrpV2) (Osm-9-like TRP channel 2) (OTRPC2) (Vanilloid receptor-like protein 1) (VRL-1)
Q8WZ42	TTN	Titin (EC 2.7.11.1) (Connectin) (Rhabdomyosarcoma antigen MU-RMS-40.14)
A0FGR9	ESYT3 FAM62C	Extended synaptotagmin-3 (E-Syt3) (Chr3Syt)
Q8IV61	RASGRP3 GRP3 KIAA0846	Ras guanyl-releasing protein 3 (Calcium and DAG-regulated guanine nucleotide exchange factor III) (Guanine nucleotide exchange factor for Rap1)
Q9BSJ8	ESYT1 FAM62A KIAA0747 MBC2	Extended synaptotagmin-1 (E-Syt1) (Membrane-bound C2 domain-containing protein)
O95267	RASGRP1 RASGRP	RAS guanyl-releasing protein 1 (Calcium and DAG-regulated guanine nucleotide exchange factor II) (CalDAG-GEFII) (Ras guanyl-releasing protein)
Q7LDG7	RASGRP2 CDC25L MCG7	RAS guanyl-releasing protein 2 (Calcium and DAG-regulated guanine nucleotide exchange factor I) (CalDAG-GEFI) (Cdc25-like protein) (hCDC25L) (F25B3.3 kinase-like protein)
Q8TDF6	RASGRP4	RAS guanyl-releasing protein 4
P49619	DGKG DAGK3	Diacylglycerol kinase gamma (DAG kinase gamma) (EC 2.7.1.107) (Diglyceride kinase gamma) (DGK-gamma)
A0FGR8	ESYT2 FAM62B KIAA1228	Extended synaptotagmin-2 (E-Syt2) (Chr2Syt)
P23743	DGKA DAGK DAGK1	Diacylglycerol kinase alpha (DAG kinase alpha) (EC 2.7.1.107) (80 kDa diacylglycerol kinase) (Diglyceride kinase alpha) (DGK-alpha)
Q9Y6T7	DGKB DAGK2 KIAA0718	Diacylglycerol kinase beta (DAG kinase beta) (EC 2.7.1.107) (90 kDa diacylglycerol kinase) (Diglyceride kinase beta) (DGK-beta)
O75923	DYSF FER1L1	Dysferlin (Dystrophy-associated fer-1-like protein) (Fer-1-like protein 1)
Q14184	DOC2B DOC2BL	Double C2-like domain-containing protein beta (Doc2-beta)
Q14183	DOC2A	Double C2-like domain-containing protein alpha (Doc2) (Doc2-alpha)
P17252	PRKCA PKCA PRKACA	Protein kinase C alpha type (PKC-A) (PKC-alpha) (EC 2.7.11.13)
Q8IXI1	RHOT2 ARHT2 C16orf39	Mitochondrial Rho GTPase 2 (MIRO-2) (hMiro-2) (EC 3.6.5.-) (Ras homolog gene family member T2)
Q6DN12	MCTP2	Multiple C2 and transmembrane domain-containing protein 2
O14594	NCAN CSPG3 NEUR	Neurocan core protein (Chondroitin sulfate proteoglycan 3)
P14222	PRF1 PFP	Perforin-1 (P1) (Cytolysin) (Lymphocyte pore-forming protein) (PFP)
Q8IXI2	RHOT1 ARHT1	Mitochondrial Rho GTPase 1 (MIRO-1) (hMiro-1) (EC 3.6.5.-) (Rac-GTP-binding protein-like protein) (Ras homolog gene family member T1)
Q14680	MELK KIAA0175	Maternal embryonic leucine zipper kinase (hMELK) (EC 2.7.11.1) (Protein kinase Eg3) (pEg3 kinase) (Protein kinase PK38) (hPK38) (Tyrosine-protein kinase MELK) (EC 2.7.10.2)
Q6DN14	MCTP1	Multiple C2 and transmembrane domain-containing protein 1
Q9Y2J0	RPH3A KIAA0985	Rabphilin-3A (Exophilin-1)
P46531	NOTCH1 TAN1	Neurogenic locus notch homolog protein 1 (Notch 1) (hN1) (Translocation-associated notch protein TAN-1) [Cleaved into: Notch 1 extracellular truncation (NEXT); Notch 1 intracellular domain (NICD)]
P16112	ACAN AGC1 CSPG1 MSK16	Aggrecan core protein (Cartilage-specific proteoglycan core protein) (CSPCP) (Chondroitin sulfate proteoglycan core protein 1) (Chondroitin sulfate proteoglycan 1) [Cleaved into: Aggrecan core protein 2]
Q08345	DDR1 CAK EDDR1 NEP NTRK4 PTK3A RTK6 TRKE	Epithelial discoidin domain-containing receptor 1 (Epithelial discoidin domain receptor 1) (EC 2.7.10.1) (CD167 antigen-like family member A) (Cell adhesion kinase) (Discoidin receptor tyrosine kinase) (HGK2) (Mammary carcinoma kinase 10) (MCK-10) (Protein-tyrosine kinase 3A) (Protein-tyrosine kinase RTK-6) (TRK E) (Tyrosine kinase DDR) (Tyrosine-protein kinase CAK) (CD antigen CD167a)
Q93084	ATP2A3	Sarcoplasmic/endoplasmic reticulum calcium ATPase 3 (SERCA3) (SR Ca(2+)-ATPase 3) (EC 3.6.3.8) (Calcium pump 3)
Q16720	ATP2B3	Plasma membrane calcium-transporting ATPase 3 (PMCA3) (EC 3.6.3.8) (Plasma membrane calcium ATPase isoform 3) (Plasma membrane calcium pump isoform 3)
P98194	ATP2C1 KIAA1347 PMR1L HUSSY-28	Calcium-transporting ATPase type 2C member 1 (ATPase 2C1) (EC 3.6.3.8) (ATP-dependent Ca(2+) pump PMR1)
P13611	VCAN CSPG2	Versican core protein (Chondroitin sulfate proteoglycan core protein 2) (Chondroitin sulfate proteoglycan 2) (Glial hyaluronate-binding protein) (GHAP) (Large fibroblast proteoglycan) (PG-M)
Q9P212	PLCE1 KIAA1516 PLCE PPLC	1-phosphatidylinositol 4,5-bisphosphate phosphodiesterase epsilon-1 (EC 3.1.4.11) (Pancreas-enriched phospholipase C) (Phosphoinositide phospholipase C-epsilon-1) (Phospholipase C-epsilon-1) (PLC-epsilon-1)
Q15147	PLCB4	1-phosphatidylinositol 4,5-bisphosphate phosphodiesterase beta-4 (EC 3.1.4.11) (Phosphoinositide phospholipase C-beta-4) (Phospholipase C-beta-4) (PLC-beta-4)
Q4KWH8	PLCH1 KIAA1069 PLCL3	1-phosphatidylinositol 4,5-bisphosphate phosphodiesterase eta-1 (EC 3.1.4.11) (Phosphoinositide phospholipase C-eta-1) (Phospholipase C-eta-1) (PLC-eta-1) (Phospholipase C-like protein 3) (PLC-L3)
O75038	PLCH2 KIAA0450 PLCL4	1-phosphatidylinositol 4,5-bisphosphate phosphodiesterase eta-2 (EC 3.1.4.11) (Phosphoinositide phospholipase C-eta-2) (Phosphoinositide phospholipase C-like 4) (PLC-L4) (Phospholipase C-like protein 4) (Phospholipase C-eta-2) (PLC-eta2)
P51178	PLCD1	1-phosphatidylinositol 4,5-bisphosphate phosphodiesterase delta-1 (EC 3.1.4.11) (Phosphoinositide phospholipase C-delta-1) (Phospholipase C-III) (PLC-III) (Phospholipase C-delta-1) (PLC-delta-1)
Q9BRC7	PLCD4	1-phosphatidylinositol 4,5-bisphosphate phosphodiesterase delta-4 (hPLCD4) (EC 3.1.4.11) (Phosphoinositide phospholipase C-delta-4) (Phospholipase C-delta-4) (PLC-delta-4)
Q86YW0	PLCZ1	1-phosphatidylinositol 4,5-bisphosphate phosphodiesterase zeta-1 (EC 3.1.4.11) (Phosphoinositide phospholipase C-zeta-1) (Phospholipase C-zeta-1) (PLC-zeta-1) (Testis-development protein NYD-SP27)
Q9Y6V0	PCLO ACZ KIAA0559	Protein piccolo (Aczonin)
Q15746	MYLK MLCK MLCK1 MYLK1	Myosin light chain kinase, smooth muscle (MLCK) (smMLCK) (EC 2.7.11.18) (Kinase-related protein) (KRP) (Telokin) [Cleaved into: Myosin light chain kinase, smooth muscle, deglutamylated form]
P0C869	PLA2G4B	Cytosolic phospholipase A2 beta (cPLA2-beta) (EC 3.1.1.4) (Phospholipase A2 group IVB)
Q86XP0	PLA2G4D	Cytosolic phospholipase A2 delta (cPLA2-delta) (EC 3.1.1.4) (Phospholipase A2 group IVD)
Q68DD2	PLA2G4F	Cytosolic phospholipase A2 zeta (cPLA2-zeta) (EC 3.1.1.4) (Phospholipase A2 group IVF)
Q9HC10	OTOF FER1L2	Otoferlin (Fer-1-like protein 2)
P47712	PLA2G4A CPLA2 PLA2G4	Cytosolic phospholipase A2 (cPLA2) (Phospholipase A2 group IVA) [Includes: Phospholipase A2 (EC 3.1.1.4) (Phosphatidylcholine 2-acylhydrolase); Lysophospholipase (EC 3.1.1.5)]
Q3MJ16	PLA2G4E	Cytosolic phospholipase A2 epsilon (cPLA2-epsilon) (EC 3.1.1.4) (Phospholipase A2 group IVE)
P16885	PLCG2	1-phosphatidylinositol 4,5-bisphosphate phosphodiesterase gamma-2 (EC 3.1.4.11) (Phosphoinositide phospholipase C-gamma-2) (Phospholipase C-IV) (PLC-IV) (Phospholipase C-gamma-2) (PLC-gamma-2)
P19174	PLCG1 PLC1	1-phosphatidylinositol 4,5-bisphosphate phosphodiesterase gamma-1 (EC 3.1.4.11) (PLC-148) (Phosphoinositide phospholipase C-gamma-1) (Phospholipase C-II) (PLC-II) (Phospholipase C-gamma-1) (PLC-gamma-1)
Q01970	PLCB3	1-phosphatidylinositol 4,5-bisphosphate phosphodiesterase beta-3 (EC 3.1.4.11) (Phosphoinositide phospholipase C-beta-3) (Phospholipase C-beta-3) (PLC-beta-3)
Q8N3E9	PLCD3 KIAA1964	1-phosphatidylinositol 4,5-bisphosphate phosphodiesterase delta-3 (EC 3.1.4.11) (Phosphoinositide phospholipase C-delta-3) (Phospholipase C-delta-3) (PLC-delta-3)
Q00722	PLCB2	1-phosphatidylinositol 4,5-bisphosphate phosphodiesterase beta-2 (EC 3.1.4.11) (Phosphoinositide phospholipase C-beta-2) (Phospholipase C-beta-2) (PLC-beta-2)
P16615	ATP2A2 ATP2B	Sarcoplasmic/endoplasmic reticulum calcium ATPase 2 (SERCA2) (SR Ca(2+)-ATPase 2) (EC 3.6.3.8) (Calcium pump 2) (Calcium-transporting ATPase sarcoplasmic reticulum type, slow twitch skeletal muscle isoform) (Endoplasmic reticulum class 1/2 Ca(2+) ATPase)
O14983	ATP2A1	Sarcoplasmic/endoplasmic reticulum calcium ATPase 1 (SERCA1) (SR Ca(2+)-ATPase 1) (EC 3.6.3.8) (Calcium pump 1) (Calcium-transporting ATPase sarcoplasmic reticulum type, fast twitch skeletal muscle isoform) (Endoplasmic reticulum class 1/2 Ca(2+) ATPase)
P20020	ATP2B1 PMCA1	Plasma membrane calcium-transporting ATPase 1 (PMCA1) (EC 3.6.3.8) (Plasma membrane calcium ATPase isoform 1) (Plasma membrane calcium pump isoform 1)
Q01814	ATP2B2 PMCA2	Plasma membrane calcium-transporting ATPase 2 (PMCA2) (EC 3.6.3.8) (Plasma membrane calcium ATPase isoform 2) (Plasma membrane calcium pump isoform 2)
B5MBY2	DGKB	Diacylglycerol kinase (DAG kinase) (EC 2.7.1.107)
H0YMF3	RASGRP1	RAS guanyl-releasing protein 1 (Fragment)
E7ERY9	ATP2B1	Calcium-transporting ATPase (EC 3.6.3.8)
H0YKM0	RASGRP1	RAS guanyl-releasing protein 1
B9DI82	PLCH2	Phosphoinositide phospholipase C (EC 3.1.4.11) (Fragment)
F5H514	RASGRP1	RAS guanyl-releasing protein 1
A0A140T9R5	NOTCH4	NOTCH4 (Neurogenic locus notch homolog protein 4)
Q5Y7D3	HLA-DQB1	HLA class II histocompatibility antigen, DQ beta 1 chain (MHC class II antigen)
A0A1U9X989	NOTCH4	NOTCH4 (Neurogenic locus notch homolog protein 4)
A0A140T8Y6	NOTCH4	NOTCH4 (Neurogenic locus notch homolog protein 4)
B4E2Q0	ATP2C1 hCG_14809	Calcium-transporting ATPase (EC 3.6.3.8)
H7BXZ6	RHOT1 hCG_1991479	Mitochondrial Rho GTPase (EC 3.6.5.-)
B5MCD5	DGKB	Diacylglycerol kinase (DAG kinase) (EC 2.7.1.107)
A0A087WVF7	ITSN2	Intersectin-2
A0A0A0MSP0	ATP2C2	Calcium-transporting ATPase (EC 3.6.3.8)
G3V4E1	DGKA	Diacylglycerol kinase (DAG kinase) (EC 2.7.1.107) (Fragment)
C9JEA7	PLCD4	Phosphoinositide phospholipase C (EC 3.1.4.11)

## Sheet: Cu_proteins in Aluminum
Entry	Gene names	Protein names
Q16206	ENOX2 COVA1	Ecto-NOX disulfide-thiol exchanger 2 (APK1 antigen) (Cytosolic ovarian carcinoma antigen 1) (Tumor-associated hydroquinone oxidase) (tNOX) [Includes: Hydroquinone [NADH] oxidase (EC 1.-.-.-); Protein disulfide-thiol oxidoreductase (EC 1.-.-.-)]
Q8TC92	ENOX1 PIG38	Ecto-NOX disulfide-thiol exchanger 1 (Candidate growth-related and time keeping constitutive hydroquinone [NADH] oxidase) (cCNOX) (Cell proliferation-inducing gene 38 protein) (Constitutive Ecto-NOX) (cNOX) [Includes: Hydroquinone [NADH] oxidase (EC 1.-.-.-); Protein disulfide-thiol oxidoreductase (EC 1.-.-.-)]
P35670	ATP7B PWD WC1 WND	Copper-transporting ATPase 2 (EC 3.6.3.54) (Copper pump 2) (Wilson disease-associated protein) [Cleaved into: WND/140 kDa]
Q04656	ATP7A MC1 MNK	Copper-transporting ATPase 1 (EC 3.6.3.54) (Copper pump 1) (Menkes disease-associated protein)

## Sheet: Zn_proteins in Hg
Entry	Gene names	Protein names
Q8TDZ2	MICAL1 MICAL NICAL	[F-actin]-monooxygenase MICAL1 (EC 1.14.13.225) (Molecule interacting with CasL protein 1) (MICAL-1) (NEDD9-interacting protein with calponin homology and LIM domains)
O94851	MICAL2 KIAA0750 MICAL2PV1 MICAL2PV2	[F-actin]-monooxygenase MICAL2 (EC 1.14.13.225) (Molecule interacting with CasL protein 2) (MICAL-2)
Q7RTP6	MICAL3 KIAA0819 KIAA1364	[F-actin]-monooxygenase MICAL3 (EC 1.14.13.225) (Molecule interacting with CasL protein 3) (MICAL-3)
J3KSK6	MICAL3	[F-actin]-monooxygenase MICAL3 (Fragment)
Q05823	RNASEL RNS4	2-5A-dependent ribonuclease (2-5A-dependent RNase) (EC 3.1.26.-) (Ribonuclease 4) (Ribonuclease L) (RNase L)
O00487	PSMD14 POH1	26S proteasome non-ATPase regulatory subunit 14 (EC 3.4.19.-) (26S proteasome regulatory subunit RPN11) (26S proteasome-associated PAD1 homolog 1)
P21589	NT5E NT5 NTE	5'-nucleotidase (5'-NT) (EC 3.1.3.5) (Ecto-5'-nucleotidase) (CD antigen CD73)
Q6ZNF0	ACP7 PAPL PAPL1	Acid phosphatase type 7 (EC 3.1.3.2) (Purple acid phosphatase long form)
Q92484	SMPDL3A ASML3A	Acid sphingomyelinase-like phosphodiesterase 3a (ASM-like phosphodiesterase 3a) (EC 3.1.4.-)
Q92485	SMPDL3B ASML3B ASMLPD	Acid sphingomyelinase-like phosphodiesterase 3b (ASM-like phosphodiesterase 3b) (EC 3.1.4.-)
O95396	MOCS3 UBA4	Adenylyltransferase and sulfurtransferase MOCS3 (Molybdenum cofactor synthesis protein 3) (Molybdopterin synthase sulfurylase) (MPT synthase sulfurylase) [Includes: Molybdopterin-synthase adenylyltransferase (EC 2.7.7.80) (Adenylyltransferase MOCS3) (Sulfur carrier protein MOCS2A adenylyltransferase); Molybdopterin-synthase sulfurtransferase (EC 2.8.1.11) (Sulfur carrier protein MOCS2A sulfurtran…
Q9Y4W6	AFG3L2	AFG3-like protein 2 (EC 3.4.24.-) (Paraplegin-like protein)
A0A087WTD7	AKAP13	A-kinase anchor protein 13
A8MYJ1	AKAP13	A-kinase anchor protein 13
Q12802	AKAP13 BRX HT31 LBC	A-kinase anchor protein 13 (AKAP-13) (AKAP-Lbc) (Breast cancer nuclear receptor-binding auxiliary protein) (Guanine nucleotide exchange factor Lbc) (Human thyroid-anchoring protein 31) (Lymphoid blast crisis oncogene) (LBC oncogene) (Non-oncogenic Rho GTPase-specific GTP exchange factor) (Protein kinase A-anchoring protein 13) (PRKA13) (p47)
Q96BT7	ALKBH8 ABH8	Alkylated DNA repair protein alkB homolog 8 (EC 1.14.11.-) (Probable alpha-ketoglutarate-dependent dioxygenase ABH8) (S-adenosyl-L-methionine-dependent tRNA methyltransferase ABH8) (tRNA (carboxymethyluridine(34)-5-O)-methyltransferase ABH8) (EC 2.1.1.229)
Q96FJ0	STAMBPL1 AMSHLP KIAA1373	AMSH-like protease (AMSH-LP) (EC 3.4.19.-) (STAM-binding protein-like 1)
P05067	APP A4 AD1	Amyloid-beta A4 protein (ABPP) (APPI) (APP) (Alzheimer disease amyloid protein) (Amyloid precursor protein) (Amyloid-beta precursor protein) (Cerebral vascular amyloid peptide) (CVAP) (PreA4) (Protease nexin-II) (PN-II) [Cleaved into: N-APP; Soluble APP-alpha (S-APP-alpha); Soluble APP-beta (S-APP-beta); C99 (Beta-secretase C-terminal fragment) (Beta-CTF); Amyloid-beta protein 42 (Abeta42) (Beta-…
Q86XD8	ZFAND4 ANUBL1	AN1-type zinc finger protein 4 (AN1-type zinc finger and ubiquitin domain-containing protein-like 1)
A0A087X1B6	AR	Androgen receptor
A0A087WZ66	AR	Androgen receptor
F5GZG9	AR	Androgen receptor
E9PEG3	AR	Androgen receptor
P10275	AR DHTR NR3C4	Androgen receptor (Dihydrotestosterone receptor) (Nuclear receptor subfamily 3 group C member 4)
Q6GPI0	ANKMY1	ANKMY1 protein (Ankyrin repeat and MYND domain-containing protein 1)
Q9P2G1	ANKIB1 KIAA1386	Ankyrin repeat and IBR domain-containing protein 1 (EC 2.3.2.31)
B5MBY4	ANKMY1 hCG_1811573	Ankyrin repeat and MYND domain containing 1, isoform CRA_a (Ankyrin repeat and MYND domain-containing protein 1)
J3KPY5	ANKMY1	Ankyrin repeat and MYND domain-containing protein 1
J3KQ21	ANKMY1	Ankyrin repeat and MYND domain-containing protein 1
Q9P2S6	ANKMY1 TSAL1 ZMYND13	Ankyrin repeat and MYND domain-containing protein 1 (Testis-specific ankyrin-like protein 1) (Zinc finger MYND domain-containing protein 13)
Q8IV38	ANKMY2	Ankyrin repeat and MYND domain-containing protein 2
Q96II5	ARAF	ARAF protein (Serine/threonine-protein kinase A-Raf)
J3QRU8	GIT1	ARF GTPase-activating protein GIT1
A0A0C4DGN6	GIT1	ARF GTPase-activating protein GIT1
Q9Y2X7	GIT1	ARF GTPase-activating protein GIT1 (ARF GAP GIT1) (Cool-associated and tyrosine-phosphorylated protein 1) (CAT-1) (CAT1) (G protein-coupled receptor kinase-interactor 1) (GRK-interacting protein 1)
F8VXI9	GIT2	ARF GTPase-activating protein GIT2
F8WAK2	GIT2	ARF GTPase-activating protein GIT2
F8W822	GIT2	ARF GTPase-activating protein GIT2
Q14161	GIT2 KIAA0148	ARF GTPase-activating protein GIT2 (ARF GAP GIT2) (Cool-interacting tyrosine-phosphorylated protein 2) (CAT-2) (CAT2) (G protein-coupled receptor kinase-interactor 2) (GRK-interacting protein 2)
Q15027	ACAP1 CENTB1 KIAA0050	Arf-GAP with coiled-coil, ANK repeat and PH domain-containing protein 1 (Centaurin-beta-1) (Cnt-b1)
A0A087X1H5	ACAP2	Arf-GAP with coiled-coil, ANK repeat and PH domain-containing protein 2
Q15057	ACAP2 CENTB2 KIAA0041	Arf-GAP with coiled-coil, ANK repeat and PH domain-containing protein 2 (Centaurin-beta-2) (Cnt-b2)
A0A0U1RQT1	ACAP2	Arf-GAP with coiled-coil, ANK repeat and PH domain-containing protein 2 (Fragment)
Q96P50	ACAP3 CENTB5 KIAA1716	Arf-GAP with coiled-coil, ANK repeat and PH domain-containing protein 3 (Centaurin-beta-5) (Cnt-b5)
O75689	ADAP1 CENTA1	Arf-GAP with dual PH domain-containing protein 1 (Centaurin-alpha-1) (Cnt-a1) (Putative MAPK-activating protein PM25)
Q2V6Q1	ADAP2 CENTA2	Arf-GAP with dual PH domain-containing protein 2 (Centaurin alpha 2)
Q9NPF8	ADAP2 CENTA2	Arf-GAP with dual PH domain-containing protein 2 (Centaurin-alpha-2) (Cnt-a2)
J3QRD3	ADAP2	Arf-GAP with dual PH domain-containing protein 2 (Fragment)
E7EUN2	AGAP1	Arf-GAP with GTPase, ANK repeat and PH domain-containing protein 1
A0A087X1U1	AGAP1	Arf-GAP with GTPase, ANK repeat and PH domain-containing protein 1
F5GXM9	AGAP1	Arf-GAP with GTPase, ANK repeat and PH domain-containing protein 1
Q9UPQ3	AGAP1 CENTG2 KIAA1099	Arf-GAP with GTPase, ANK repeat and PH domain-containing protein 1 (AGAP-1) (Centaurin-gamma-2) (Cnt-g2) (GTP-binding and GTPase-activating protein 1) (GGAP1)
H7C0A7	AGAP1	Arf-GAP with GTPase, ANK repeat and PH domain-containing protein 1 (Fragment)
Q8TF27	AGAP11 KIAA1975	Arf-GAP with GTPase, ANK repeat and PH domain-containing protein 11 (AGAP-11) (Centaurin-gamma-like protein KIAA1975)
F8VVT9	AGAP2	Arf-GAP with GTPase, ANK repeat and PH domain-containing protein 2
Q99490	AGAP2 CENTG1 KIAA0167	Arf-GAP with GTPase, ANK repeat and PH domain-containing protein 2 (AGAP-2) (Centaurin-gamma-1) (Cnt-g1) (GTP-binding and GTPase-activating protein 2) (GGAP2) (Phosphatidylinositol 3-kinase enhancer) (PIKE)
J3KNM6	AGAP2	Arf-GAP with GTPase, ANK repeat and PH domain-containing protein 2 (Fragment)
Q96P47	AGAP3 CENTG3	Arf-GAP with GTPase, ANK repeat and PH domain-containing protein 3 (AGAP-3) (CRAM-associated GTPase) (CRAG) (Centaurin-gamma-3) (Cnt-g3) (MR1-interacting protein) (MRIP-1)
H0Y873	AGAP3	Arf-GAP with GTPase, ANK repeat and PH domain-containing protein 3 (Fragment)
A0A087WSV4	AGAP4	Arf-GAP with GTPase, ANK repeat and PH domain-containing protein 4
A0A087X0Z1	AGAP4	Arf-GAP with GTPase, ANK repeat and PH domain-containing protein 4
Q96P64	AGAP4 AGAP8 CTGLF1 CTGLF5 MRIP2	Arf-GAP with GTPase, ANK repeat and PH domain-containing protein 4 (AGAP-4) (Centaurin-gamma-like family member 1) (Centaurin-gamma-like family member 5)
J3KQL4	AGAP5	Arf-GAP with GTPase, ANK repeat and PH domain-containing protein 5
A0A0D9SFU9	AGAP5	Arf-GAP with GTPase, ANK repeat and PH domain-containing protein 5
A6NIR3	AGAP5 CTGLF2	Arf-GAP with GTPase, ANK repeat and PH domain-containing protein 5 (AGAP-5) (Centaurin-gamma-like family member 2)
A0A087X0I8	AGAP6	Arf-GAP with GTPase, ANK repeat and PH domain-containing protein 6
Q5VW22	AGAP6 CTGLF3	Arf-GAP with GTPase, ANK repeat and PH domain-containing protein 6 (AGAP-6) (Centaurin-gamma-like family member 3)
E7EU13	ARAP1	Arf-GAP with Rho-GAP domain, ANK repeat and PH domain-containing protein 1
Q96P48	ARAP1 CENTD2 KIAA0782	Arf-GAP with Rho-GAP domain, ANK repeat and PH domain-containing protein 1 (Centaurin-delta-2) (Cnt-d2)
Q8WZ64	ARAP2 CENTD1 KIAA0580	Arf-GAP with Rho-GAP domain, ANK repeat and PH domain-containing protein 2 (Centaurin-delta-1) (Cnt-d1) (Protein PARX)
G5E9Y3	ARAP3 CENTD3 hCG_1980706	Arf-GAP with Rho-GAP domain, ANK repeat and PH domain-containing protein 3 (Centaurin, delta 3, isoform CRA_b)
Q8WWN8	ARAP3 CENTD3	Arf-GAP with Rho-GAP domain, ANK repeat and PH domain-containing protein 3 (Centaurin-delta-3) (Cnt-d3)
Q9ULH1	ASAP1 DDEF1 KIAA1249	Arf-GAP with SH3 domain, ANK repeat and PH domain-containing protein 1 (130 kDa phosphatidylinositol 4,5-bisphosphate-dependent ARF1 GTPase-activating protein) (ADP-ribosylation factor-directed GTPase-activating protein 1) (ARF GTPase-activating protein 1) (Development and differentiation-enhancing factor 1) (DEF-1) (Differentiation-enhancing factor 1) (PIP2-dependent ARF1 GAP)
A0A0A0MRE5	ASAP1 DDEF1 hCG_2009092	Arf-GAP with SH3 domain, ANK repeat and PH domain-containing protein 1 (Development and differentiation enhancing factor 1, isoform CRA_b)
H0YBF7	ASAP1	Arf-GAP with SH3 domain, ANK repeat and PH domain-containing protein 1 (Fragment)
O43150	ASAP2 DDEF2 KIAA0400	Arf-GAP with SH3 domain, ANK repeat and PH domain-containing protein 2 (Development and differentiation-enhancing factor 2) (Paxillin-associated protein with ARF GAP activity 3) (PAG3) (Pyk2 C-terminus-associated protein) (PAP)
Q8TDY4	ASAP3 DDEFL1 UPLC1	Arf-GAP with SH3 domain, ANK repeat and PH domain-containing protein 3 (Development and differentiation-enhancing factor-like 1) (Protein up-regulated in liver cancer 1)
Q6HA08	ASTL	Astacin-like metalloendopeptidase (EC 3.4.-.-) (Oocyte astacin) (Ovastacin)
Q96S55	WRNIP1 WHIP	ATPase WRNIP1 (EC 3.6.1.3) (Werner helicase-interacting protein 1)
Q96TA2	YME1L1 FTSH1 YME1L UNQ1868/PRO4304	ATP-dependent zinc metalloprotease YME1L1 (EC 3.4.24.-) (ATP-dependent metalloprotease FtsH1) (Meg-4) (Presenilin-associated metalloprotease) (PAMP) (YME1-like protein 1)
Q9UBR1	UPB1 BUP1	Beta-ureidopropionase (EC 3.5.1.6) (BUP-1) (Beta-alanine synthase) (N-carbamoyl-beta-alanine amidohydrolase)
G8JLB0	NR1H4	Bile acid receptor
Q96RI1	NR1H4 BAR FXR HRR1 RIP14	Bile acid receptor (Farnesoid X-activated receptor) (Farnesol receptor HRR-1) (Nuclear receptor subfamily 1 group H member 4) (Retinoid X receptor-interacting protein 14) (RXR-interacting protein 14)
P54132	BLM RECQ2 RECQL3	Bloom syndrome protein (EC 3.6.4.12) (DNA helicase, RecQ-like type 2) (RecQ2) (RecQ protein-like 3)
P13497	BMP1 PCOLC	Bone morphogenetic protein 1 (BMP-1) (EC 3.4.24.19) (Mammalian tolloid protein) (mTld) (Procollagen C-proteinase) (PCP)
Q99728	BARD1	BRCA1-associated RING domain protein 1 (BARD-1) (EC 2.3.2.27) (RING-type E3 ubiquitin transferase BARD1)
P38398	BRCA1 RNF53	Breast cancer type 1 susceptibility protein (EC 2.3.2.27) (RING finger protein 53) (RING-type E3 ubiquitin transferase BRCA1)
E7EUM2	BRCA1	Breast cancer type 1 susceptibility protein (Fragment)
P27708	CAD	CAD protein [Includes: Glutamine-dependent carbamoyl-phosphate synthase (EC 6.3.5.5); Aspartate carbamoyltransferase (EC 2.1.3.2); Dihydroorotase (EC 3.5.2.3)]
P00915	CA1	Carbonic anhydrase 1 (EC 4.2.1.1) (Carbonate dehydratase I) (Carbonic anhydrase B) (CAB) (Carbonic anhydrase I) (CA-I)
E5RH81	CA1	Carbonic anhydrase 1 (Fragment)
E5RG43	CA1	Carbonic anhydrase 1 (Fragment)
H0YBE2	CA1	Carbonic anhydrase 1 (Fragment)
E5RIF9	CA1	Carbonic anhydrase 1 (Fragment)
E5RFE7	CA1	Carbonic anhydrase 1 (Fragment)
E5RHP7	CA1	Carbonic anhydrase 1 (Fragment)
B3KUB4	CA12 hCG_2003428	Carbonic anhydrase 12 (Carbonic anhydrase XII, isoform CRA_d) (cDNA FLJ39526 fis, clone PUAEN2003018, highly similar to CARBONIC ANHYDRASE XII)
O43570	CA12	Carbonic anhydrase 12 (EC 4.2.1.1) (Carbonate dehydratase XII) (Carbonic anhydrase XII) (CA-XII) (Tumor antigen HOM-RCC-3.1.3)
Q8N1Q1	CA13	Carbonic anhydrase 13 (EC 4.2.1.1) (Carbonate dehydratase XIII) (Carbonic anhydrase XIII) (CA-XIII)
Q9ULX7	CA14 UNQ690/PRO1335	Carbonic anhydrase 14 (EC 4.2.1.1) (Carbonate dehydratase XIV) (Carbonic anhydrase XIV) (CA-XIV)
P00918	CA2	Carbonic anhydrase 2 (EC 4.2.1.1) (Carbonate dehydratase II) (Carbonic anhydrase C) (CAC) (Carbonic anhydrase II) (CA-II)
P07451	CA3	Carbonic anhydrase 3 (EC 4.2.1.1) (Carbonate dehydratase III) (Carbonic anhydrase III) (CA-III)
P22748	CA4	Carbonic anhydrase 4 (EC 4.2.1.1) (Carbonate dehydratase IV) (Carbonic anhydrase IV) (CA-IV)
P35218	CA5A CA5	Carbonic anhydrase 5A, mitochondrial (EC 4.2.1.1) (Carbonate dehydratase VA) (Carbonic anhydrase VA) (CA-VA)
Q9Y2D0	CA5B	Carbonic anhydrase 5B, mitochondrial (EC 4.2.1.1) (Carbonate dehydratase VB) (Carbonic anhydrase VB) (CA-VB)
P23280	CA6	Carbonic anhydrase 6 (EC 4.2.1.1) (Carbonate dehydratase VI) (Carbonic anhydrase VI) (CA-VI) (Salivary carbonic anhydrase) (Secreted carbonic anhydrase)
F8W148	CA6	Carbonic anhydrase 6 (Fragment)
P43166	CA7	Carbonic anhydrase 7 (EC 4.2.1.1) (Carbonate dehydratase VII) (Carbonic anhydrase VII) (CA-VII)
A0A087WYS4	CA9	Carbonic anhydrase 9
Q16790	CA9 G250 MN	Carbonic anhydrase 9 (EC 4.2.1.1) (Carbonate dehydratase IX) (Carbonic anhydrase IX) (CA-IX) (CAIX) (Membrane antigen MN) (P54/58N) (Renal cell carcinoma-associated antigen G250) (RCC-associated antigen G250) (pMW1)
P35219	CA8 CALS	Carbonic anhydrase-related protein (CARP) (Carbonic anhydrase VIII) (CA-VIII)
P15085	CPA1 CPA	Carboxypeptidase A1 (EC 3.4.17.1)
P48052	CPA2	Carboxypeptidase A2 (EC 3.4.17.15)
Q9UI42	CPA4 CPA3 UNQ694/PRO1339	Carboxypeptidase A4 (EC 3.4.17.-) (Carboxypeptidase A3)
Q8WXQ8	CPA5	Carboxypeptidase A5 (EC 3.4.17.-)
Q8N4T0	CPA6 CPAH	Carboxypeptidase A6 (EC 3.4.17.-)
P15086	CPB1 CPB PCPB	Carboxypeptidase B (EC 3.4.17.2) (Pancreas-specific protein) (PASP)
Q96IY4	CPB2	Carboxypeptidase B2 (EC 3.4.17.20) (Carboxypeptidase U) (CPU) (Plasma carboxypeptidase B) (pCPB) (Thrombin-activable fibrinolysis inhibitor) (TAFI)
O75976	CPD	Carboxypeptidase D (EC 3.4.17.22) (Metallocarboxypeptidase D) (gp180)
P16870	CPE	Carboxypeptidase E (CPE) (EC 3.4.17.10) (Carboxypeptidase H) (CPH) (Enkephalin convertase) (Prohormone-processing carboxypeptidase)
P14384	CPM	Carboxypeptidase M (CPM) (EC 3.4.17.12)
P15169	CPN1 ACBP	Carboxypeptidase N catalytic chain (CPN) (EC 3.4.17.3) (Anaphylatoxin inactivator) (Arginine carboxypeptidase) (Carboxypeptidase N polypeptide 1) (Carboxypeptidase N small subunit) (Kininase-1) (Lysine carboxypeptidase) (Plasma carboxypeptidase B) (Serum carboxypeptidase N) (SCPN)
Q8IVL8	CPO	Carboxypeptidase O (CPO) (EC 3.4.17.-)
Q66K79	CPZ	Carboxypeptidase Z (CPZ) (EC 3.4.17.-)
B7Z934	EBF2	cDNA FLJ55302, highly similar to Transcription factor COE2
B7Z493	FGD4	cDNA FLJ55905, highly similar to FYVE, RhoGEF and PH domain-containing protein 4
B4DXU5	NR1H3	cDNA FLJ56172, highly similar to Oxysterols receptor LXR-alpha
P62633	CNBP RNF163 ZNF9	Cellular nucleic acid-binding protein (CNBP) (Zinc finger protein 9)
D6RAT4	CNBP	Cellular nucleic acid-binding protein (Fragment)
Q12873	CHD3	Chromodomain-helicase-DNA-binding protein 3 (CHD-3) (EC 3.6.4.12) (ATP-dependent helicase CHD3) (Mi-2 autoantigen 240 kDa protein) (Mi2-alpha) (Zinc finger helicase) (hZFH)
F5GWX5	CHD4	Chromodomain-helicase-DNA-binding protein 4
A0A0C4DGG9	CHD4	Chromodomain-helicase-DNA-binding protein 4
Q14839	CHD4	Chromodomain-helicase-DNA-binding protein 4 (CHD-4) (EC 3.6.4.12) (ATP-dependent helicase CHD4) (Mi-2 autoantigen 218 kDa protein) (Mi2-beta)
F2Z2R5	CHD5	Chromodomain-helicase-DNA-binding protein 5
Q8TDI0	CHD5 KIAA0444	Chromodomain-helicase-DNA-binding protein 5 (CHD-5) (EC 3.6.4.12) (ATP-dependent helicase CHD5)
O14578	CIT CRIK KIAA0949 STK21	Citron Rho-interacting kinase (CRIK) (EC 2.7.11.1) (Serine/threonine-protein kinase 21)
Q9UKF6	CPSF3 CPSF73	Cleavage and polyadenylation specificity factor subunit 3 (EC 3.1.27.-) (Cleavage and polyadenylation specificity factor 73 kDa subunit) (CPSF 73 kDa subunit) (mRNA 3'-end-processing endonuclease CPSF-73)
O95639	CPSF4 CPSF30 NAR NEB1	Cleavage and polyadenylation specificity factor subunit 4 (Cleavage and polyadenylation specificity factor 30 kDa subunit) (CPSF 30 kDa subunit) (NS1 effector domain-binding protein 1) (Neb-1) (No arches homolog)
C9JEV9	CPSF4	Cleavage and polyadenylation-specificity factor subunit 4
B7Z7B0	CPSF4	Cleavage and polyadenylation-specificity factor subunit 4 (cDNA FLJ52791, highly similar to Cleavage and polyadenylation specificityfactor 30 kDa subunit)
Q6GZ81	NR1I3	Constitutive androstane receptor SV10 (Constitutive androstane receptor SV4) (Constitutive androstane receptor SV9) (Nuclear receptor subfamily 1 group I member 3)
Q6GZ72	NR1I3	Constitutive androstane receptor SV17 (Constitutive androstane receptor SV18) (Nuclear receptor subfamily 1 group I member 3)
Q6GZ70	NR1I3	Constitutive androstane receptor SV19 (Constitutive androstane receptor SV20) (Nuclear receptor subfamily 1 group I member 3)
Q6GZ69	NR1I3	Constitutive androstane receptor SV21 (Nuclear receptor subfamily 1 group I member 3)
O14618	CCS	Copper chaperone for superoxide dismutase (Superoxide dismutase copper chaperone)
P10589	NR2F1 EAR3 ERBAL3 TFCOUP1	COUP transcription factor 1 (COUP-TF1) (COUP transcription factor I) (COUP-TF I) (Nuclear receptor subfamily 2 group F member 1) (V-erbA-related protein 3) (EAR-3)
F1DAL9	NR2F1	COUP transcription factor 1 (Ovalbumin upstream promoter-transcription factor I)
P24468	NR2F2 ARP1 TFCOUP2	COUP transcription factor 2 (COUP-TF2) (Apolipoprotein A-I regulatory protein 1) (ARP-1) (COUP transcription factor II) (COUP-TF II) (Nuclear receptor subfamily 2 group F member 2)
Q92793	CREBBP CBP	CREB-binding protein (EC 2.3.1.48)
P51813	BMX	Cytoplasmic tyrosine-protein kinase BMX (EC 2.7.10.2) (Bone marrow tyrosine kinase gene in chromosome X protein) (Epithelial and endothelial tyrosine kinase) (ETK) (NTK38)
Q9UPW5	AGTPBP1 CCP1 KIAA1035 NNA1	Cytosolic carboxypeptidase 1 (EC 3.4.17.-) (ATP/GTP-binding protein 1) (Nervous system nuclear protein induced by axotomy protein 1 homolog)
Q5U5Z8	AGBL2 CCP2	Cytosolic carboxypeptidase 2 (EC 3.4.17.-) (ATP/GTP-binding protein-like 2)
Q8NEM8	AGBL3 CCP3	Cytosolic carboxypeptidase 3 (EC 3.4.17.-) (ATP/GTP-binding protein-like 3)
Q96MI9	AGBL1 CCP4	Cytosolic carboxypeptidase 4 (EC 3.4.17.-) (ATP/GTP-binding protein-like 1)
Q5VU57	AGBL4 CCP6	Cytosolic carboxypeptidase 6 (EC 3.4.17.-) (ATP/GTP-binding protein-like 4)
Q8NDL9	AGBL5 CCP5	Cytosolic carboxypeptidase-like protein 5 (EC 3.4.17.-) (ATP/GTP-binding protein-like 5)
Q8NG44	PGR PR hCG_39657	Delta 3+6/2 progesterone receptor (Progesterone receptor, isoform CRA_e)
Q8NG42	PGR PR hCG_39657	Delta 6/2 progesterone receptor (Progesterone receptor, isoform CRA_a)
P13716	ALAD	Delta-aminolevulinic acid dehydratase (ALADH) (EC 4.2.1.24) (Porphobilinogen synthase)
H0YA20	DGKQ	Diacylglycerol kinase (DAG kinase) (EC 2.7.1.107) (Fragment)
Q16760	DGKD KIAA0145	Diacylglycerol kinase delta (DAG kinase delta) (EC 2.7.1.107) (130 kDa diacylglycerol kinase) (Diglyceride kinase delta) (DGK-delta)
Q86XP1	DGKH	Diacylglycerol kinase eta (DAG kinase eta) (EC 2.7.1.107) (Diglyceride kinase eta) (DGK-eta)
Q5KSL6	DGKK	Diacylglycerol kinase kappa (DAG kinase kappa) (EC 2.7.1.107) (142 kDa diacylglycerol kinase) (Diglyceride kinase kappa) (DGK-kappa)
P52824	DGKQ DAGK4	Diacylglycerol kinase theta (DAG kinase theta) (EC 2.7.1.107) (Diglyceride kinase theta) (DGK-theta)
Q14117	DPYS	Dihydropyrimidinase (DHP) (DHPase) (EC 3.5.2.2) (Dihydropyrimidine amidohydrolase) (Hydantoinase)
Q5FWF4	ZRANB3	DNA annealing helicase and endonuclease ZRANB3 (Annealing helicase 2) (AH2) (Zinc finger Ran-binding domain-containing protein 3) [Includes: DNA annealing helicase ZRANB3 (EC 3.6.4.-); Endonuclease ZRANB3 (EC 3.1.-.-)]
P49916	LIG3	DNA ligase 3 (EC 6.5.1.1) (DNA ligase III) (Polydeoxyribonucleotide synthase [ATP] 3)
M0R2B7	POLD1	DNA polymerase (EC 2.7.7.7)
A6NMQ1	POLA1	DNA polymerase (EC 2.7.7.7)
A0A087WU64	POLA1	DNA polymerase (EC 2.7.7.7)
P09884	POLA1 POLA	DNA polymerase alpha catalytic subunit (EC 2.7.7.7) (DNA polymerase alpha catalytic subunit p180)
P28340	POLD1 POLD	DNA polymerase delta catalytic subunit (EC 2.7.7.7) (EC 3.1.11.-) (DNA polymerase subunit delta p125)
F5H1D6	POLE	DNA polymerase epsilon catalytic subunit (EC 2.7.7.7)
F5H7E4	POLE	DNA polymerase epsilon catalytic subunit (EC 2.7.7.7)
Q07864	POLE POLE1	DNA polymerase epsilon catalytic subunit A (EC 2.7.7.7) (DNA polymerase II subunit A)
O60673	REV3L POLZ REV3	DNA polymerase zeta catalytic subunit (EC 2.7.7.7) (Protein reversionless 3-like) (REV3-like) (hREV3)
E7EN38	RAD50	DNA repair protein RAD50 (Fragment)
Q92878	RAD50	DNA repair protein RAD50 (hRAD50) (EC 3.6.-.-)
Q13472	TOP3A TOP3	DNA topoisomerase 3-alpha (EC 5.99.1.2) (DNA topoisomerase III alpha)
F5GZY3	DMD	Dystrophin
E9PDN5	DMD	Dystrophin
A0A087WV90	DMD	Dystrophin
F8VX32	DMD	Dystrophin
E7ESB2	DMD	Dystrophin
A0A087WTU7	DMD	Dystrophin
P11532	DMD	Dystrophin
E7EQR9	DMD	Dystrophin
E7EQS5	DMD	Dystrophin
A0A075B6G3	DMD	Dystrophin
H0Y304	DMD	Dystrophin (Fragment)
Q13474	DRP2	Dystrophin-related protein 2 (DRP-2)
Q8TBB1	LNX1 LNX PDZRN2 UNQ574/PRO1136	E3 ubiquitin-protein ligase LNX (EC 2.3.2.27) (Ligand of Numb-protein X 1) (Numb-binding protein 1) (PDZ domain-containing RING finger protein 2) (RING-type E3 ubiquitin transferase LNX)
Q86YT6	MIB1 DIP1 KIAA1323 ZZANK2	E3 ubiquitin-protein ligase MIB1 (EC 2.3.2.27) (DAPK-interacting protein 1) (DIP-1) (Mind bomb homolog 1) (RING-type E3 ubiquitin transferase MIB1) (Zinc finger ZZ type with ankyrin repeat domain protein 2)
E9PD12	MIB2	E3 ubiquitin-protein ligase MIB2
F2Z2L2	MIB2	E3 ubiquitin-protein ligase MIB2
D6RAZ0	MIB2	E3 ubiquitin-protein ligase MIB2
Q96AX9	MIB2 SKD ZZANK1	E3 ubiquitin-protein ligase MIB2 (EC 2.3.2.27) (Mind bomb homolog 2) (Novel zinc finger protein) (Novelzin) (Putative NF-kappa-B-activating protein 002N) (RING-type E3 ubiquitin transferase MIB2) (Skeletrophin) (Zinc finger ZZ type with ankyrin repeat domain protein 1)
H0YAM8	MIB2	E3 ubiquitin-protein ligase MIB2 (Fragment)
O15344	MID1 FXY RNF59 TRIM18 XPRF	E3 ubiquitin-protein ligase Midline-1 (EC 2.3.2.27) (Midin) (Putative transcription factor XPRF) (RING finger protein 59) (RING finger protein Midline-1) (RING-type E3 ubiquitin transferase Midline-1) (Tripartite motif-containing protein 18)
C9J453	MID1	E3 ubiquitin-protein ligase Midline-1 (Fragment)
O60260	PRKN PARK2	E3 ubiquitin-protein ligase parkin (Parkin) (EC 2.3.2.31) (Parkin RBR E3 ubiquitin-protein ligase) (Parkinson juvenile disease protein 2) (Parkinson disease protein 2)
Q9UPQ7	PDZRN3 KIAA1095 LNX3 SEMCAP3	E3 ubiquitin-protein ligase PDZRN3 (EC 2.3.2.27) (Ligand of Numb protein X 3) (PDZ domain-containing RING finger protein 3) (RING-type E3 ubiquitin transferase PDZRN3) (Semaphorin cytoplasmic domain-associated protein 3) (Protein SEMACAP3)
K4DI94	SHPRH	E3 ubiquitin-protein ligase SHPRH
Q149N8	SHPRH KIAA2023	E3 ubiquitin-protein ligase SHPRH (EC 2.3.2.27) (EC 3.6.4.-) (RING-type E3 ubiquitin transferase SHPRH) (SNF2, histone-linker, PHD and RING finger domain-containing helicase)
A0A0D9SFM0	SHPRH hCG_18061	E3 ubiquitin-protein ligase SHPRH (SNF2 histone linker PHD RING helicase, isoform CRA_a)
P36406	TRIM23 ARD1 ARFD1 RNF46	E3 ubiquitin-protein ligase TRIM23 (EC 2.3.2.27) (ADP-ribosylation factor domain-containing protein 1) (GTP-binding protein ARD-1) (RING finger protein 46) (RING-type E3 ubiquitin transferase TRIM23) (Tripartite motif-containing protein 23)
Q13049	TRIM32 HT2A	E3 ubiquitin-protein ligase TRIM32 (EC 2.3.2.27) (72 kDa Tat-interacting protein) (RING-type E3 ubiquitin transferase TRIM32) (Tripartite motif-containing protein 32) (Zinc finger protein HT2A)
E9PBG3	TRIM36	E3 ubiquitin-protein ligase TRIM36
Q9NQ86	TRIM36 RBCC728 RNF98	E3 ubiquitin-protein ligase TRIM36 (EC 2.3.2.27) (RING finger protein 98) (RING-type E3 ubiquitin transferase TRIM36) (Tripartite motif-containing protein 36) (Zinc-binding protein Rbcc728)
Q2Q1W2	TRIM71 LIN41	E3 ubiquitin-protein ligase TRIM71 (EC 2.3.2.27) (Protein lin-41 homolog) (RING-type E3 ubiquitin transferase TRIM71) (Tripartite motif-containing protein 71)
Q9C026	TRIM9 KIAA0282 RNF91	E3 ubiquitin-protein ligase TRIM9 (EC 2.3.2.27) (RING finger protein 91) (RING-type E3 ubiquitin transferase TRIM9) (Tripartite motif-containing protein 9)
A0A087WTW0	UHRF1	E3 ubiquitin-protein ligase UHRF1
Q96T88	UHRF1 ICBP90 NP95 RNF106	E3 ubiquitin-protein ligase UHRF1 (EC 2.3.2.27) (Inverted CCAAT box-binding protein of 90 kDa) (Nuclear protein 95) (Nuclear zinc finger protein Np95) (HuNp95) (hNp95) (RING finger protein 106) (RING-type E3 ubiquitin transferase UHRF1) (Transcription factor ICBP90) (Ubiquitin-like PHD and RING finger domain-containing protein 1) (hUHRF1) (Ubiquitin-like-containing PHD and RING finger domains pro…
A0A087WVR3	UHRF1 hCG_23497	E3 ubiquitin-protein ligase UHRF1 (Ubiquitin-like, containing PHD and RING finger domains, 1, isoform CRA_b)
Q96PU4	UHRF2 NIRF RNF107	E3 ubiquitin-protein ligase UHRF2 (EC 2.3.2.27) (Np95/ICBP90-like RING finger protein) (Np95-like RING finger protein) (Nuclear protein 97) (Nuclear zinc finger protein Np97) (RING finger protein 107) (RING-type E3 ubiquitin transferase UHRF2) (Ubiquitin-like PHD and RING finger domain-containing protein 2) (Ubiquitin-like-containing PHD and RING finger domains protein 2)
P87889	ERVK-10	Endogenous retrovirus group K member 10 Gag polyprotein (HERV-K10 Gag protein) (HERV-K107 Gag protein) (HERV-K_5q33.3 provirus ancestral Gag polyprotein) (Gag polyprotein)
P10266	ERVK-10	Endogenous retrovirus group K member 10 Pol protein (HERV-K10 Pol protein) (HERV-K107 Pol protein) (HERV-K_5q33.3 provirus ancestral Pol protein) [Includes: Reverse transcriptase (RT) (EC 2.7.7.49); Ribonuclease H (RNase H) (EC 3.1.26.4); Integrase (IN)]
Q9UQG0	ERVK-11	Endogenous retrovirus group K member 11 Pol protein (HERV-K_3q27.2 provirus ancestral Pol protein) [Includes: Reverse transcriptase (RT) (EC 2.7.7.49); Ribonuclease H (RNase H) (EC 3.1.26.4); Integrase (IN)]
P62684	HERVK_113	Endogenous retrovirus group K member 113 Gag polyprotein (HERV-K113 Gag protein) (HERV-K_19p13.11 provirus ancestral Gag polyprotein) (Gag polyprotein)
P63132	HERVK_113	Endogenous retrovirus group K member 113 Pol protein (HERV-K113 Pol protein) (HERV-K_19p13.11 provirus ancestral Pol protein) [Includes: Reverse transcriptase (RT) (EC 2.7.7.49); Ribonuclease H (RNase H) (EC 3.1.26.4); Integrase (IN)]
Q9QC07	ERVK-18	Endogenous retrovirus group K member 18 Pol protein (HERV-K(C1a) Pol protein) (HERV-K110 Pol protein) (HERV-K18 Pol protein) (HERV-K_1q23.3 provirus ancestral Pol protein) [Includes: Reverse transcriptase (EC 2.7.7.49); Ribonuclease H (RNase H) (EC 3.1.26.4)]
Q9YNA8	ERVK-19	Endogenous retrovirus group K member 19 Gag polyprotein (HERV-K(C19) Gag protein) (HERV-K_19q11 provirus ancestral Gag polyprotein) (Gag polyprotein)
Q9WJR5	ERVK-19	Endogenous retrovirus group K member 19 Pol protein (HERV-K(C19) Pol protein) (HERV-K_19q11 provirus ancestral Pol protein) [Includes: Reverse transcriptase (RT) (EC 2.7.7.49); Ribonuclease H (RNase H) (EC 3.1.26.4); Integrase (IN)]
P62683	ERVK-21	Endogenous retrovirus group K member 21 Gag polyprotein (HERV-K_12q14.1 provirus ancestral Gag polyprotein) (Gag polyprotein)
P63145	ERVK-24	Endogenous retrovirus group K member 24 Gag polyprotein (HERV-K101 Gag protein) (HERV-K_22q11.21 provirus ancestral Gag polyprotein) (Gag polyprotein)
P63136	ERVK-25	Endogenous retrovirus group K member 25 Pol protein (HERV-K_11q22.1 provirus ancestral Pol protein) [Includes: Reverse transcriptase (RT) (EC 2.7.7.49); Ribonuclease H (RNase H) (EC 3.1.26.4); Integrase (IN)]
Q9HDB9	ERVK-5 ERVK5	Endogenous retrovirus group K member 5 Gag polyprotein (HERV-K(II) Gag protein) (HERV-K_3q12.3 provirus ancestral Gag polyprotein) (Gag polyprotein)
Q7LDI9	ERVK-6 ERVK6	Endogenous retrovirus group K member 6 Gag polyprotein (HERV-K(C7) Gag protein) (HERV-K(HML-2.HOM) Gag protein) (HERV-K108 Gag protein) (HERV-K_7p22.1 provirus ancestral Gag polyprotein) (Gag polyprotein)
Q9BXR3	ERVK-6 ERVK6	Endogenous retrovirus group K member 6 Pol protein (HERV-K(C7) Pol protein) (HERV-K(HML-2.HOM) Pol protein) (HERV-K108 Pol protein) (HERV-K_7p22.1 provirus ancestral Pol protein) [Includes: Reverse transcriptase (RT) (EC 2.7.7.49); Ribonuclease H (RNase H) (EC 3.1.26.4); Integrase (IN)]
P63130	ERVK-7	Endogenous retrovirus group K member 7 Gag polyprotein (HERV-K(III) Gag protein) (HERV-K102 Gag protein) (HERV-K_1q22 provirus ancestral Gag polyprotein) (Gag polyprotein)
P63135	ERVK-7	Endogenous retrovirus group K member 7 Pol protein (HERV-K(III) Pol protein) (HERV-K102 Pol protein) (HERV-K_1q22 provirus ancestral Pol protein) [Includes: Reverse transcriptase (RT) (EC 2.7.7.49); Ribonuclease H (RNase H) (EC 3.1.26.4); Integrase (IN)]
P62685	ERVK-8	Endogenous retrovirus group K member 8 Gag polyprotein (HERV-K115 Gag protein) (HERV-K_8p23.1 provirus ancestral Gag polyprotein) (Gag polyprotein)
P63133	ERVK-8	Endogenous retrovirus group K member 8 Pol protein (HERV-K115 Pol protein) (HERV-K_8p23.1 provirus ancestral Pol protein) [Includes: Reverse transcriptase (RT) (EC 2.7.7.49); Ribonuclease H (RNase H) (EC 3.1.26.4); Integrase (IN)]
P63126	ERVK-9	Endogenous retrovirus group K member 9 Gag polyprotein (HERV-K(C6) Gag protein) (HERV-K109 Gag protein) (HERV-K_6q14.1 provirus ancestral Gag polyprotein) (Gag polyprotein)
P63128	ERVK-9	Endogenous retrovirus group K member 9 Pol protein (HERV-K(C6) Gag-Pol protein) (HERV-K109 Gag-Pol protein) (HERV-K_6q14.1 provirus ancestral Gag-Pol polyprotein) [Includes: Protease (EC 3.4.23.50) (PR) (Retropepsin); Reverse transcriptase/ribonuclease H (EC 2.7.7.49) (EC 2.7.7.7) (EC 3.1.26.4) (p66 RT)]
Q53H82	LACTB2 CGI-83	Endoribonuclease LACTB2 (EC 3.1.27.-) (Beta-lactamase-like protein 2)
H0Y4W6	ESR1	Estrogen receptor
P03372	ESR1 ESR NR3A1	Estrogen receptor (ER) (ER-alpha) (Estradiol receptor) (Nuclear receptor subfamily 3 group A member 1)
B0QYW7	ESR1	Estrogen receptor (Fragment)
G3V5S2	ESR2	Estrogen receptor beta
Q92731	ESR2 ESTRB NR3A2	Estrogen receptor beta (ER-beta) (Nuclear receptor subfamily 3 group A member 2)
P62508	ESRRG ERR3 ERRG2 KIAA0832 NR3B3	Estrogen-related receptor gamma (ERR gamma-2) (Estrogen receptor-related protein 3) (Nuclear receptor subfamily 3 group B member 3)
C9JU32	ESRRG	Estrogen-related receptor gamma (Fragment)
B7ZM68	FGD5	FGD5 protein (FYVE, RhoGEF and PH domain-containing protein 5)
P98174	FGD1 FGDY ZFYVE3	FYVE, RhoGEF and PH domain-containing protein 1 (Faciogenital dysplasia 1 protein) (Rho/Rac guanine nucleotide exchange factor FGD1) (Rho/Rac GEF) (Zinc finger FYVE domain-containing protein 3)
Q7Z6J4	FGD2 ZFYVE4	FYVE, RhoGEF and PH domain-containing protein 2 (Zinc finger FYVE domain-containing protein 4)
Q5JSP0	FGD3 ZFYVE5	FYVE, RhoGEF and PH domain-containing protein 3 (Zinc finger FYVE domain-containing protein 5)
F8VWL3	FGD4	FYVE, RhoGEF and PH domain-containing protein 4
E9PJX4	FGD4	FYVE, RhoGEF and PH domain-containing protein 4
F8W1R0	FGD4	FYVE, RhoGEF and PH domain-containing protein 4
Q96M96	FGD4 FRABP ZFYVE6	FYVE, RhoGEF and PH domain-containing protein 4 (Actin filament-binding protein frabin) (FGD1-related F-actin-binding protein) (Zinc finger FYVE domain-containing protein 6)
Q6ZNL6	FGD5 ZFYVE23	FYVE, RhoGEF and PH domain-containing protein 5 (Zinc finger FYVE domain-containing protein 23)
F8VQX5	FGD6	FYVE, RhoGEF and PH domain-containing protein 6 (Fragment)
Q6ZV73	FGD6 KIAA1362 ZFYVE24	FYVE, RhoGEF and PH domain-containing protein 6 (Zinc finger FYVE domain-containing protein 24)
P04150	NR3C1 GRL	Glucocorticoid receptor (GR) (Nuclear receptor subfamily 3 group C member 1)
P23415	GLRA1	Glycine receptor subunit alpha-1 (Glycine receptor 48 kDa subunit) (Glycine receptor strychnine-binding subunit)
P23416	GLRA2	Glycine receptor subunit alpha-2
O43194	GPR39	G-protein coupled receptor 39
Q9Y2T3	GDA KIAA1258	Guanine deaminase (Guanase) (Guanine aminase) (EC 3.5.4.3) (Guanine aminohydrolase) (GAH) (p51-nedasin)
P52735	VAV2	Guanine nucleotide exchange factor VAV2 (VAV-2)
Q9UKW4	VAV3	Guanine nucleotide exchange factor VAV3 (VAV-3)
Q14527	HLTF HIP116A RNF80 SMARCA3 SNF2L3 ZBU1	Helicase-like transcription factor (EC 2.3.2.27) (EC 3.6.4.-) (DNA-binding protein/plasminogen activator inhibitor 1 regulator) (HIP116) (RING finger protein 80) (RING-type E3 ubiquitin transferase HLTF) (SWI/SNF-related matrix-associated actin-dependent regulator of chromatin subfamily A member 3) (Sucrose nonfermenting protein 2-like 3)
H7C5K0	HLTF	Helicase-like transcription factor (Fragment)
A0A0C4DGA6	HLTF SMARCA3 hCG_21212	Helicase-like transcription factor (SWI/SNF related, matrix associated, actin dependent regulator of chromatin, subfamily a, member 3, isoform CRA_c)
A0A087WXV4	HNF4A	Hepatocyte nuclear factor 4-alpha
P41235	HNF4A HNF4 NR2A1 TCF14	Hepatocyte nuclear factor 4-alpha (HNF-4-alpha) (Nuclear receptor subfamily 2 group A member 1) (Transcription factor 14) (TCF-14) (Transcription factor HNF-4)
Q14541	HNF4G NR2A2	Hepatocyte nuclear factor 4-gamma (HNF-4-gamma) (Nuclear receptor subfamily 2 group A member 2)
Q09472	EP300 P300	Histone acetyltransferase p300 (p300 HAT) (EC 2.3.1.48) (E1A-associated protein p300) (Histone butyryltransferase p300) (EC 2.3.1.-) (Histone crotonyltransferase p300) (EC 2.3.1.-) (Protein propionyltransferase p300) (EC 2.3.1.-)
O14607	UTY KDM6C	Histone demethylase UTY (EC 1.14.11.-) (Ubiquitously-transcribed TPR protein on the Y chromosome) (Ubiquitously-transcribed Y chromosome tetratricopeptide repeat protein)
Q5VVJ2	MYSM1 KIAA1915	Histone H2A deubiquitinase MYSM1 (2A-DUB) (EC 3.4.19.-) (Myb-like, SWIRM and MPN domain-containing protein 1)
Q9UPP1	PHF8 KIAA1111 ZNF422	Histone lysine demethylase PHF8 (EC 1.14.11.27) (PHD finger protein 8)
Q9H9B1	EHMT1 EUHMTASE1 GLP KIAA1876 KMT1D	Histone-lysine N-methyltransferase EHMT1 (EC 2.1.1.-) (EC 2.1.1.43) (Euchromatic histone-lysine N-methyltransferase 1) (Eu-HMTase1) (G9a-like protein 1) (GLP) (GLP1) (Histone H3-K9 methyltransferase 5) (H3-K9-HMTase 5) (Lysine N-methyltransferase 1D)
Q96KQ7	EHMT2 BAT8 C6orf30 G9A KMT1C NG36	Histone-lysine N-methyltransferase EHMT2 (EC 2.1.1.-) (EC 2.1.1.43) (Euchromatic histone-lysine N-methyltransferase 2) (HLA-B-associated transcript 8) (Histone H3-K9 methyltransferase 3) (H3-K9-HMTase 3) (Lysine N-methyltransferase 1C) (Protein G9a)
Q9BYW2	SETD2 HIF1 HYPB KIAA1732 KMT3A SET2 HSPC069	Histone-lysine N-methyltransferase SETD2 (EC 2.1.1.43) (HIF-1) (Huntingtin yeast partner B) (Huntingtin-interacting protein 1) (HIP-1) (Huntingtin-interacting protein B) (Lysine N-methyltransferase 3A) (Protein-lysine N-methyltransferase SETD2) (EC 2.1.1.-) (SET domain-containing protein 2) (hSET2) (p231HBP)
E9PMV2	HLA-DQA1	HLA class II histocompatibility antigen, DQ alpha 1 chain (Fragment)
B9VVT8	HNF4A HNF4alpha	HNF4alpha10/11/12 (Hepatocyte nuclear factor 4-alpha) (Fragment)
Q16775	HAGH GLO2 HAGH1	Hydroxyacylglutathione hydrolase, mitochondrial (EC 3.1.2.6) (Glyoxalase II) (Glx II)
Q6PII5	HAGHL	Hydroxyacylglutathione hydrolase-like protein (EC 3.1.2.-)
Q9BYX4	IFIH1 MDA5 RH116	Interferon-induced helicase C domain-containing protein 1 (EC 3.6.4.13) (Clinically amyopathic dermatomyositis autoantigen 140 kDa) (CADM-140 autoantigen) (Helicase with 2 CARD domains) (Helicard) (Interferon-induced with helicase C domain protein 1) (Melanoma differentiation-associated protein 5) (MDA-5) (Murabutide down-regulated protein) (RIG-I-like receptor 2) (RLR-2) (RNA helicase-DEAD box p…
B3KV94	KDM5B JARID1B hCG_2027322	Jumonji, AT rich interactive domain 1B (RBP2-like), isoform CRA_a (Lysine-specific demethylase 5B) (cDNA FLJ16281 fis, clone NT2RI3003104, highly similar to Homo sapiens Jumonji, AT rich interactive domain 1B (RBP2-like) (JARID1B), mRNA) (Fragment)
Q9Y5K2	KLK4 EMSP1 PRSS17 PSTS	Kallikrein-4 (EC 3.4.21.-) (Enamel matrix serine proteinase 1) (Kallikrein-like protein 1) (KLK-L1) (Prostase) (Serine protease 17)
A0A0A0MQW1	KSR1	Kinase suppressor of Ras 1
Q8IVT5	KSR1 KSR	Kinase suppressor of Ras 1
E9PB13	KSR2	Kinase suppressor of Ras 2
Q6VAB6	KSR2	Kinase suppressor of Ras 2 (hKSR2) (EC 2.7.11.1)
Q04760	GLO1	Lactoylglutathione lyase (EC 4.4.1.5) (Aldoketomutase) (Glyoxalase I) (Glx I) (Ketone-aldehyde mutase) (Methylglyoxalase) (S-D-lactoylglutathione methylglyoxal lyase)
Q8N448	LNX2 PDZRN1	Ligand of Numb protein X 2 (Numb-binding protein 2) (PDZ domain-containing RING finger protein 1)
Q9UPQ0	LIMCH1 KIAA1102	LIM and calponin homology domains-containing protein 1
D6RD46	LIMCH1	LIM and calponin homology domains-containing protein 1
E9PC47	LIMK1	LIM domain kinase 1
P53667	LIMK1 LIMK	LIM domain kinase 1 (LIMK-1) (EC 2.7.11.1)
B5MC51	LIMK2	LIM domain kinase 2
P53671	LIMK2	LIM domain kinase 2 (LIMK-2) (EC 2.7.11.1)
J3KP06	LMO7	LIM domain only protein 7
F8WD26	LMO7	LIM domain only protein 7
E9PMS6	LMO7	LIM domain only protein 7
E9PMT2	LMO7	LIM domain only protein 7
Q8WWI1	LMO7 FBX20 FBXO20 KIAA0858	LIM domain only protein 7 (LMO-7) (F-box only protein 20) (LOMP)
O75112	LDB3 KIAA0613 ZASP	LIM domain-binding protein 3 (Protein cypher) (Z-band alternatively spliced PDZ-motif protein)
P46736	BRCC3 BRCC36 C6.1A CXorf53	Lys-63-specific deubiquitinase BRCC36 (EC 3.4.19.-) (BRCA1-A complex subunit BRCC36) (BRCA1/BRCA2-containing complex subunit 3) (BRCA1/BRCA2-containing complex subunit 36) (BRISC complex subunit BRCC36)
Q9Y2K7	KDM2A CXXC8 FBL7 FBXL11 JHDM1A KIAA1004	Lysine-specific demethylase 2A (EC 1.14.11.27) (CXXC-type zinc finger protein 8) (F-box and leucine-rich repeat protein 11) (F-box protein FBL7) (F-box protein Lilina) (F-box/LRR-repeat protein 11) (JmjC domain-containing histone demethylation protein 1A) ([Histone-H3]-lysine-36 demethylase 1A)
I3VM54	KDM2A	Lysine-specific demethylase 2A (N-terminus deleted lysine-specific demethylase 2A)
Q9Y4C1	KDM3A JHDM2A JMJD1 JMJD1A KIAA0742 TSGA	Lysine-specific demethylase 3A (EC 1.14.11.-) (JmjC domain-containing histone demethylation protein 2A) (Jumonji domain-containing protein 1A)
Q7LBC6	KDM3B C5orf7 JHDM2B JMJD1B KIAA1082	Lysine-specific demethylase 3B (EC 1.14.11.-) (JmjC domain-containing histone demethylation protein 2B) (Jumonji domain-containing protein 1B) (Nuclear protein 5qNCA)
O75164	KDM4A JHDM3A JMJD2 JMJD2A KIAA0677	Lysine-specific demethylase 4A (EC 1.14.11.-) (JmjC domain-containing histone demethylation protein 3A) (Jumonji domain-containing protein 2A)
F5GX28	KDM4B	Lysine-specific demethylase 4B
A0A0C4DFL8	KDM4B	Lysine-specific demethylase 4B
O94953	KDM4B JHDM3B JMJD2B KIAA0876	Lysine-specific demethylase 4B (EC 1.14.11.-) (JmjC domain-containing histone demethylation protein 3B) (Jumonji domain-containing protein 2B)
Q9H3R0	KDM4C GASC1 JHDM3C JMJD2C KIAA0780	Lysine-specific demethylase 4C (EC 1.14.11.-) (Gene amplified in squamous cell carcinoma 1 protein) (GASC-1 protein) (JmjC domain-containing histone demethylation protein 3C) (Jumonji domain-containing protein 2C)
Q6B0I6	KDM4D JHDM3D JMJD2D	Lysine-specific demethylase 4D (EC 1.14.11.-) (JmjC domain-containing histone demethylation protein 3D) (Jumonji domain-containing protein 2D)
B2RXH2	KDM4E KDM4DL	Lysine-specific demethylase 4E (EC 1.14.11.-) (KDM4D-like protein) (Lysine-specific demethylase 4D-like)
P29375	KDM5A JARID1A RBBP2 RBP2	Lysine-specific demethylase 5A (EC 1.14.11.-) (Histone demethylase JARID1A) (Jumonji/ARID domain-containing protein 1A) (Retinoblastoma-binding protein 2) (RBBP-2)
Q9UGL1	KDM5B JARID1B PLU1 RBBP2H1	Lysine-specific demethylase 5B (EC 1.14.11.-) (Cancer/testis antigen 31) (CT31) (Histone demethylase JARID1B) (Jumonji/ARID domain-containing protein 1B) (PLU-1) (Retinoblastoma-binding protein 2 homolog 1) (RBP2-H1)
P41229	KDM5C DXS1272E JARID1C SMCX XE169	Lysine-specific demethylase 5C (EC 1.14.11.-) (Histone demethylase JARID1C) (Jumonji/ARID domain-containing protein 1C) (Protein SmcX) (Protein Xe169)
Q9BY66	KDM5D HY HYA JARID1D KIAA0234 SMCY	Lysine-specific demethylase 5D (EC 1.14.11.-) (Histocompatibility Y antigen) (H-Y) (Histone demethylase JARID1D) (Jumonji/ARID domain-containing protein 1D) (Protein SmcY)
E9PFH2	KDM5D	Lysine-specific demethylase 5D (Fragment)
O15550	KDM6A UTX	Lysine-specific demethylase 6A (EC 1.14.11.-) (Histone demethylase UTX) (Ubiquitously-transcribed TPR protein on the X chromosome) (Ubiquitously-transcribed X chromosome tetratricopeptide repeat protein)
O15054	KDM6B JMJD3 KIAA0346	Lysine-specific demethylase 6B (EC 1.14.11.-) (JmjC domain-containing protein 3) (Jumonji domain-containing protein 3) (Lysine demethylase 6B)
Q6ZMT4	KDM7A JHDM1D KDM7 KIAA1718	Lysine-specific demethylase 7A (EC 1.14.11.-) (JmjC domain-containing histone demethylation protein 1D) (Lysine-specific demethylase 7)
O43593	HR	Lysine-specific demethylase hairless (EC 1.14.11.-)
O75151	PHF2 CENP-35 KIAA0662	Lysine-specific demethylase PHF2 (EC 1.14.11.-) (GRC5) (PHD finger protein 2)
H0Y6H0	KDM1B	Lysine-specific histone demethylase 1B
Q8NB78	KDM1B AOF1 C6orf193 LSD2	Lysine-specific histone demethylase 1B (EC 1.-.-.-) (Flavin-containing amine oxidase domain-containing protein 1) (Lysine-specific histone demethylase 2)
Q3LIE5	ADPRM C17orf48 MDS006 Nbla03831	Manganese-dependent ADP-ribose/CDP-alcohol diphosphatase (EC 3.6.1.13) (EC 3.6.1.16) (EC 3.6.1.53) (ADPRibase-Mn) (CDP-choline phosphohydrolase)
Q9HBH9	MKNK2 GPRK7 MNK2	MAP kinase-interacting serine/threonine-protein kinase 2 (EC 2.7.11.1) (MAP kinase signal-integrating kinase 2) (MAPK signal-integrating kinase 2) (Mnk2)
P15088	CPA3	Mast cell carboxypeptidase A (MC-CPA) (EC 3.4.17.1) (Carboxypeptidase A3)
O43462	MBTPS2 S2P	Membrane-bound transcription factor site-2 protease (EC 3.4.24.85) (Endopeptidase S2P) (Sterol regulatory element-binding proteins intramembrane protease) (SREBPs intramembrane protease)
J3QKX5	MEP1B hCG_25081	Meprin A subunit (EC 3.4.24.-) (Endopeptidase-2)
B7ZL91	MEP1A	Meprin A subunit (EC 3.4.24.-) (Endopeptidase-2)
Q16819	MEP1A	Meprin A subunit alpha (EC 3.4.24.18) (Endopeptidase-2) (N-benzoyl-L-tyrosyl-P-amino-benzoic acid hydrolase subunit alpha) (PABA peptide hydrolase) (PPH alpha)
Q16820	MEP1B	Meprin A subunit beta (EC 3.4.24.63) (Endopeptidase-2) (Meprin B) (N-benzoyl-L-tyrosyl-P-amino-benzoic acid hydrolase subunit beta) (PABA peptide hydrolase) (PPH beta)
A4D2B0	MBLAC1	Metallo-beta-lactamase domain-containing protein 1 (EC 3.-.-.-)
Q68D91	MBLAC2	Metallo-beta-lactamase domain-containing protein 2 (EC 3.-.-.-)
E9PD25	TLL1	Metalloendopeptidase (EC 3.4.24.-)
Q3MIM8	BMP1	Metalloendopeptidase (EC 3.4.24.-)
Q8N3F8	MICALL1 KIAA1668 MIRAB13	MICAL-like protein 1 (Molecule interacting with Rab13) (MIRab13)
Q8IY33	MICALL2 JRAB	MICAL-like protein 2 (Junctional Rab13-binding protein) (Molecule interacting with CasL-like 2) (MICAL-L2)
A0A0D9SFL9	NR3C2	Mineralocorticoid receptor
P08235	NR3C2 MCR MLR	Mineralocorticoid receptor (MR) (Nuclear receptor subfamily 3 group C member 2)
B0ZBF6	NR3C2	Mineralocorticoid receptor (Nuclear receptor subfamily 3, group C, member 2 variant 1)
B0ZBF8	NR3C2	Mineralocorticoid receptor 3 (Nuclear receptor subfamily 3, group C, member 2 variant 4)
Q13233	MAP3K1 MAPKKK1 MEKK MEKK1	Mitogen-activated protein kinase kinase kinase 1 (EC 2.7.11.25) (MAPK/ERK kinase kinase 1) (MEK kinase 1) (MEKK 1)
Q8N594	MPND	MPN domain-containing protein (EC 3.4.-.-)
P28698	MZF1 MZF ZNF42 ZSCAN6	Myeloid zinc finger 1 (MZF-1) (Zinc finger and SCAN domain-containing protein 6) (Zinc finger protein 42)
Q14896	MYBPC3	Myosin-binding protein C, cardiac-type (Cardiac MyBP-C) (C-protein, cardiac muscle isoform)
Q96PD5	PGLYRP2 PGLYRPL PGRPL UNQ3103/PRO10102	N-acetylmuramoyl-L-alanine amidase (EC 3.5.1.28) (Peptidoglycan recognition protein 2) (Peptidoglycan recognition protein long) (PGRP-L)
Q6IQ20	NAPEPLD C7orf18	N-acyl-phosphatidylethanolamine-hydrolyzing phospholipase D (N-acyl phosphatidylethanolamine phospholipase D) (NAPE-PLD) (NAPE-hydrolyzing phospholipase D) (EC 3.1.4.54)
A0A0A0MR47	ZNF274	Neurotrophin receptor-interacting factor homolog
Q96GC6	ZNF274 ZKSCAN19 SP2114	Neurotrophin receptor-interacting factor homolog (Zinc finger protein 274) (Zinc finger protein HFB101) (Zinc finger protein with KRAB and SCAN domains 19) (Zinc finger protein zfp2) (Zf2)
A0A0A0MRJ0	CDC42BPA	Non-specific serine/threonine protein kinase (EC 2.7.11.1)
Q6NSM0	NR1D2	NR1D2 protein (Nuclear receptor subfamily 1 group D member 2)
C0H5Y2	NR1I3 hCG_1766510	NR1I3 protein (Nuclear receptor subfamily 1 group I member 3) (Nuclear receptor subfamily 1, group I, member 3, isoform CRA_c)
Q8IVZ9	NR2E3	NR2E3 protein (Photoreceptor-specific nuclear receptor)
A0A0C4DG53	RORA	Nuclear receptor ROR-alpha
H0YLS5	RORA	Nuclear receptor ROR-alpha (Fragment)
P35398	RORA NR1F1 RZRA	Nuclear receptor ROR-alpha (Nuclear receptor RZR-alpha) (Nuclear receptor subfamily 1 group F member 1) (RAR-related orphan receptor A) (Retinoid-related orphan receptor-alpha)
A0A0C4DFP5	RORA hCG_1787044	Nuclear receptor ROR-alpha (RAR-related orphan receptor A, isoform CRA_c)
Q92753	RORB NR1F2 RZRB	Nuclear receptor ROR-beta (Nuclear receptor RZR-beta) (Nuclear receptor subfamily 1 group F member 2) (Retinoid-related orphan receptor-beta)
P51449	RORC NR1F3 RORG RZRG	Nuclear receptor ROR-gamma (Nuclear receptor RZR-gamma) (Nuclear receptor subfamily 1 group F member 3) (RAR-related orphan receptor C) (Retinoid-related orphan receptor-gamma)
P20393	NR1D1 EAR1 HREV THRAL	Nuclear receptor subfamily 1 group D member 1 (Rev-erbA-alpha) (V-erbA-related protein 1) (EAR-1)
Q14995	NR1D2	Nuclear receptor subfamily 1 group D member 2 (Orphan nuclear hormone receptor BD73) (Rev-erb alpha-related receptor) (RVR) (Rev-erb-beta) (V-erbA-related protein 1-related) (EAR-1R)
J3KPQ3	NR1I2 hCG_21777	Nuclear receptor subfamily 1 group I member 2 (Nuclear receptor subfamily 1, group I, member 2, isoform CRA_a)
H0Y8E2	NR1I2 hCG_21777	Nuclear receptor subfamily 1 group I member 2 (Nuclear receptor subfamily 1, group I, member 2, isoform CRA_c)
O75469	NR1I2 PXR	Nuclear receptor subfamily 1 group I member 2 (Orphan nuclear receptor PAR1) (Orphan nuclear receptor PXR) (Pregnane X receptor) (Steroid and xenobiotic receptor) (SXR)
E9PCF2	NR1I3	Nuclear receptor subfamily 1 group I member 3
B7Z8R7	NR1I3	Nuclear receptor subfamily 1 group I member 3 (cDNA FLJ56764, highly similar to Orphan nuclear receptor NR1I3) (cDNA, FLJ79107, highly similar to Orphan nuclear receptor NR1I3)
Q14994	NR1I3 CAR	Nuclear receptor subfamily 1 group I member 3 (Constitutive activator of retinoid response) (Constitutive active response) (Constitutive androstane receptor) (CAR) (Orphan nuclear receptor MB67)
A0A087WUK4	NR2C1	Nuclear receptor subfamily 2 group C member 1
P13056	NR2C1 TR2	Nuclear receptor subfamily 2 group C member 1 (Orphan nuclear receptor TR2) (Testicular receptor 2)
C9JKS0	NR2C2	Nuclear receptor subfamily 2 group C member 2 (Fragment)
P49116	NR2C2 TAK1 TR4	Nuclear receptor subfamily 2 group C member 2 (Orphan nuclear receptor TAK1) (Orphan nuclear receptor TR4) (Testicular receptor 4)
Q9Y466	NR2E1 TLX	Nuclear receptor subfamily 2 group E member 1 (Nuclear receptor TLX) (Protein tailless homolog) (Tll) (hTll)
P10588	NR2F6 EAR2 ERBAL2	Nuclear receptor subfamily 2 group F member 6 (V-erbA-related protein 2) (EAR-2)
F5GXF0	NR4A1	Nuclear receptor subfamily 4 group A member 1
P22736	NR4A1 GFRP1 HMR NAK1	Nuclear receptor subfamily 4 group A member 1 (Early response protein NAK1) (Nuclear hormone receptor NUR/77) (Nur77) (Orphan nuclear receptor HMR) (Orphan nuclear receptor TR3) (ST-59) (Testicular receptor 3)
H3BT85	NR4A1	Nuclear receptor subfamily 4 group A member 1 (Fragment)
C9J8W4	NR4A2	Nuclear receptor subfamily 4 group A member 2
F8W6I3	NR4A2	Nuclear receptor subfamily 4 group A member 2
E9PBQ4	NR4A2	Nuclear receptor subfamily 4 group A member 2
H7BZ00	NR4A2	Nuclear receptor subfamily 4 group A member 2 (Fragment)
P43354	NR4A2 NOT NURR1 TINUR	Nuclear receptor subfamily 4 group A member 2 (Immediate-early response protein NOT) (Orphan nuclear receptor NURR1) (Transcriptionally-inducible nuclear receptor)
Q92570	NR4A3 CHN CSMF MINOR NOR1 TEC	Nuclear receptor subfamily 4 group A member 3 (Mitogen-induced nuclear orphan receptor) (Neuron-derived orphan receptor 1) (Nuclear hormone receptor NOR-1)
O00482	NR5A2 B1F CPF FTF	Nuclear receptor subfamily 5 group A member 2 (Alpha-1-fetoprotein transcription factor) (B1-binding factor) (hB1F) (CYP7A promoter-binding factor) (Hepatocytic transcription factor) (Liver receptor homolog 1) (LRH-1)
H0Y328	NR5A2	Nuclear receptor subfamily 5 group A member 2 (Fragment)
C9JDI9	NR6A1	Nuclear receptor subfamily 6 group A member 1 (Fragment)
Q15406	NR6A1 GCNF	Nuclear receptor subfamily 6 group A member 1 (Germ cell nuclear factor) (GCNF) (hGCNF) (Retinoid receptor-related testis-specific receptor) (RTR) (hRTR)
B5MBY7	NR1H3	Oxysterols receptor LXR-alpha
E9PID2	NR1H3	Oxysterols receptor LXR-alpha
E9PLL4	NR1H3	Oxysterols receptor LXR-alpha
C9JBS2	NR1H3	Oxysterols receptor LXR-alpha (Fragment)
C9J4R0	NR1H3	Oxysterols receptor LXR-alpha (Fragment)
C9JJ16	NR1H3	Oxysterols receptor LXR-alpha (Fragment)
C9JCS0	NR1H3	Oxysterols receptor LXR-alpha (Fragment)
C9J2C8	NR1H3	Oxysterols receptor LXR-alpha (Fragment)
Q13133	NR1H3 LXRA	Oxysterols receptor LXR-alpha (Liver X receptor alpha) (Nuclear receptor subfamily 1 group H member 3)
M0R2F9	NR1H2	Oxysterols receptor LXR-beta
M0R229	NR1H2	Oxysterols receptor LXR-beta
M0R0K3	NR1H2	Oxysterols receptor LXR-beta
M0QYE6	NR1H2	Oxysterols receptor LXR-beta (Fragment)
M0QZF5	NR1H2	Oxysterols receptor LXR-beta (Fragment)
M0R1V8	NR1H2	Oxysterols receptor LXR-beta (Fragment)
P55055	NR1H2 LXRB NER UNR	Oxysterols receptor LXR-beta (Liver X receptor beta) (Nuclear receptor NER) (Nuclear receptor subfamily 1 group H member 2) (Ubiquitously-expressed nuclear receptor)
Q9UQ90	SPG7 CAR CMAR PGN	Paraplegin (EC 3.4.24.-) (Cell matrix adhesion regulator) (Spastic paraplegia 7 protein)
Q9GZU2	PEG3 KIAA0287 ZSCAN24	Paternally-expressed gene 3 protein (Zinc finger and SCAN domain-containing protein 24)
O00151	PDLIM1 CLIM1 CLP36	PDZ and LIM domain protein 1 (C-terminal LIM domain protein 1) (Elfin) (LIM domain protein CLP-36)
A0A087WVI1	PDLIM2	PDZ and LIM domain protein 2
Q96JY6	PDLIM2 PP6345	PDZ and LIM domain protein 2 (PDZ-LIM protein mystique)
A0A087WYF8	PDLIM3	PDZ and LIM domain protein 3
Q53GG5	PDLIM3 ALP	PDZ and LIM domain protein 3 (Actinin-associated LIM protein) (Alpha-actinin-2-associated LIM protein)
P50479	PDLIM4 RIL	PDZ and LIM domain protein 4 (LIM protein RIL) (Reversion-induced LIM protein)
Q96HC4	PDLIM5 ENH L9	PDZ and LIM domain protein 5 (Enigma homolog) (Enigma-like PDZ and LIM domains protein)
Q9NR12	PDLIM7 ENIGMA	PDZ and LIM domain protein 7 (LIM mineralization protein) (LMP) (Protein enigma)
Q8NEN9	PDZD8 PDZK8	PDZ domain-containing protein 8 (Sarcoma antigen NY-SAR-84/NY-SAR-104)
Q6ZMN7	PDZRN4 LNX4 SEMCAP3L	PDZ domain-containing RING finger protein 4 (Ligand of Numb protein X 4) (SEMACAP3-like protein)
P19021	PAM	Peptidyl-glycine alpha-amidating monooxygenase (PAM) [Includes: Peptidylglycine alpha-hydroxylating monooxygenase (PHM) (EC 1.14.17.3); Peptidyl-alpha-hydroxyglycine alpha-amidating lyase (EC 4.3.2.5) (Peptidylamidoglycolate lyase) (PAL)]
Q07869	PPARA NR1C1 PPAR	Peroxisome proliferator-activated receptor alpha (PPAR-alpha) (Nuclear receptor subfamily 1 group C member 1)
Q03181	PPARD NR1C2 PPARB	Peroxisome proliferator-activated receptor delta (PPAR-delta) (NUCI) (Nuclear hormone receptor 1) (NUC1) (Nuclear receptor subfamily 1 group C member 2) (Peroxisome proliferator-activated receptor beta) (PPAR-beta)
P37231	PPARG NR1C3	Peroxisome proliferator-activated receptor gamma (PPAR-gamma) (Nuclear receptor subfamily 1 group C member 3)
E9PFV2	PPARG	Peroxisome proliferator-activated receptor gamma (PPAR-gamma) (Nuclear receptor subfamily 1 group C member 3)
E9PFX5	PPARG	Peroxisome proliferator-activated receptor gamma (PPAR-gamma) (Nuclear receptor subfamily 1 group C member 3)
E7EUD1	PPARG	Peroxisome proliferator-activated receptor gamma (PPAR-gamma) (Nuclear receptor subfamily 1 group C member 3) (Fragment)
Q9Y5X4	NR2E3 PNR RNR	Photoreceptor-specific nuclear receptor (Nuclear receptor subfamily 2 group E member 3) (Retina-specific nuclear receptor)
Q96S99	PLEKHF1 APPD LAPF ZFYVE15	Pleckstrin homology domain-containing family F member 1 (PH domain-containing family F member 1) (Lysosome-associated apoptosis-inducing protein containing PH and FYVE domains) (Apoptosis-inducing protein) (PH and FYVE domain-containing protein 1) (Phafin-1) (Zinc finger FYVE domain-containing protein 15)
Q9H8W4	PLEKHF2 ZFYVE18	Pleckstrin homology domain-containing family F member 2 (PH domain-containing family F member 2) (Endoplasmic reticulum-associated apoptosis-involved protein containing PH and FYVE domains) (EAPF) (PH and FYVE domain-containing protein 2) (Phafin-2) (Phafin2) (Zinc finger FYVE domain-containing protein 18)
Q6ZWE6	PLEKHM3 DAPR PLEKHM1L	Pleckstrin homology domain-containing family M member 3 (PH domain-containing family M member 3) (Differentiation associated protein)
P09874	PARP1 ADPRT PPOL	Poly [ADP-ribose] polymerase 1 (PARP-1) (EC 2.4.2.30) (ADP-ribosyltransferase diphtheria toxin-like 1) (ARTD1) (NAD(+) ADP-ribosyltransferase 1) (ADPRT 1) (Poly[ADP-ribose] synthase 1)
Q9NSA2	KCND1	Potassium voltage-gated channel subfamily D member 1 (Voltage-gated potassium channel subunit Kv4.1)
Q9NZV8	KCND2 KIAA1044	Potassium voltage-gated channel subfamily D member 2 (Voltage-gated potassium channel subunit Kv4.2)
Q9UK17	KCND3	Potassium voltage-gated channel subfamily D member 3 (Voltage-gated potassium channel subunit Kv4.3)
Q9NRD5	PICK1 PRKCABP	PRKCA-binding protein (Protein interacting with C kinase 1) (Protein kinase C-alpha-binding protein)
Q9UJV9	DDX41 ABS	Probable ATP-dependent RNA helicase DDX41 (EC 3.6.4.13) (DEAD box protein 41) (DEAD box protein abstrakt homolog)
A2A376	DDX58	Probable ATP-dependent RNA helicase DDX58
O95786	DDX58	Probable ATP-dependent RNA helicase DDX58 (EC 3.6.4.13) (DEAD box protein 58) (RIG-I-like receptor 1) (RLR-1) (Retinoic acid-inducible gene 1 protein) (RIG-1) (Retinoic acid-inducible gene I protein) (RIG-I)
Q5T1V6	DDX59 ZNHIT5	Probable ATP-dependent RNA helicase DDX59 (EC 3.6.4.13) (DEAD box protein 59) (Zinc finger HIT domain-containing protein 5)
Q96C10	DHX58 D11LGP2E LGP2	Probable ATP-dependent RNA helicase DHX58 (EC 3.6.4.13) (Probable ATP-dependent helicase LGP2) (Protein D11Lgp2 homolog) (RIG-I-like receptor 3) (RLR-3) (RIG-I-like receptor LGP2) (RLR)
Q96SM3	CPXM1 CPX1 CPXM UNQ3015/PRO9782	Probable carboxypeptidase X1 (EC 3.4.17.-) (Metallocarboxypeptidase CPX-1)
Q8N490	PNKD KIAA1184 MR1 TAHCCP2 FKSG19 UNQ2491/PRO5778	Probable hydrolase PNKD (EC 3.-.-.-) (Myofibrillogenesis regulator 1) (MR-1) (Paroxysmal nonkinesiogenic dyskinesia protein) (Trans-activated by hepatitis C virus core protein 2)
Q96NU7	AMDHD1 HMFT1272	Probable imidazolonepropionase (EC 3.5.2.7) (Amidohydrolase domain-containing protein 1)
Q15652	JMJD1C JHDM2C KIAA1380 TRIP8	Probable JmjC domain-containing histone demethylation protein 2C (EC 1.14.11.-) (Jumonji domain-containing protein 1C) (Thyroid receptor-interacting protein 8) (TR-interacting protein 8) (TRIP-8)
A0A087WXR4	PGR	Progesterone receptor
A0A0J9YVP1	PGR	Progesterone receptor (Fragment)
P06401	PGR NR3C3	Progesterone receptor (PR) (Nuclear receptor subfamily 3 group C member 3)
Q8NG45	PGR PR hCG_39657	Progesterone receptor, isoform CRA_f
A0A087X0I9	PRKCQ	Protein kinase C (EC 2.7.11.13)
J3KRN5	PRKCA	Protein kinase C alpha type
P17252	PRKCA PKCA PRKACA	Protein kinase C alpha type (PKC-A) (PKC-alpha) (EC 2.7.11.13)
P05771	PRKCB PKCB PRKCB1	Protein kinase C beta type (PKC-B) (PKC-beta) (EC 2.7.11.13)
Q05655	PRKCD	Protein kinase C delta type (EC 2.7.11.13) (Tyrosine-protein kinase PRKCD) (EC 2.7.10.2) (nPKC-delta) [Cleaved into: Protein kinase C delta type regulatory subunit; Protein kinase C delta type catalytic subunit (Sphingosine-dependent protein kinase-1) (SDK1)]
Q02156	PRKCE PKCE	Protein kinase C epsilon type (EC 2.7.11.13) (nPKC-epsilon)
P24723	PRKCH PKCL PRKCL	Protein kinase C eta type (EC 2.7.11.13) (PKC-L) (nPKC-eta)
P05129	PRKCG PKCG	Protein kinase C gamma type (PKC-gamma) (EC 2.7.11.13)
P41743	PRKCI DXS1179E	Protein kinase C iota type (EC 2.7.11.13) (Atypical protein kinase C-lambda/iota) (PRKC-lambda/iota) (aPKC-lambda/iota) (nPKC-iota)
Q04759	PRKCQ PRKCT	Protein kinase C theta type (EC 2.7.11.13) (nPKC-theta)
Q05513	PRKCZ PKC2	Protein kinase C zeta type (EC 2.7.11.13) (nPKC-zeta)
Q9H9Z2	LIN28A CSDD1 LIN28 ZCCHC1	Protein lin-28 homolog A (Lin-28A) (Zinc finger CCHC domain-containing protein 1)
A0A1B0GVD3	LIN28B	Protein lin-28 homolog B
A0A1B0GTK2	LIN28B	Protein lin-28 homolog B (Fragment)
Q6ZN17	LIN28B CSDD2	Protein lin-28 homolog B (Lin-28B)
Q9Y6V0	PCLO ACZ KIAA0559	Protein piccolo (Aczonin)
P80511	S100A12	Protein S100-A12 (CGRP) (Calcium-binding protein in amniotic fluid 1) (CAAF1) (Calgranulin-C) (CAGC) (Extracellular newly identified RAGE-binding protein) (EN-RAGE) (Migration inhibitory factor-related protein 6) (MRP-6) (p6) (Neutrophil S100 protein) (S100 calcium-binding protein A12) [Cleaved into: Calcitermin]
Q96FQ6	S100A16 S100F AAG13	Protein S100-A16 (Aging-associated gene 13 protein) (Protein S100-F) (S100 calcium-binding protein A16)
P33764	S100A3 S100E	Protein S100-A3 (Protein S-100E) (S100 calcium-binding protein A3)
P33763	S100A5 S100D	Protein S100-A5 (Protein S-100D) (S100 calcium-binding protein A5)
P31151	S100A7 PSOR1 S100A7C	Protein S100-A7 (Psoriasin) (S100 calcium-binding protein A7)
Q86SG5	S100A7A S100A15 S100A7L1	Protein S100-A7A (S100 calcium-binding protein A15) (S100 calcium-binding protein A7-like 1) (S100 calcium-binding protein A7A)
Q5SY68	S100A7L2 S100A7B	Protein S100-A7-like 2 (S100 calcium-binding protein A7-like 2)
P05109	S100A8 CAGA CFAG MRP8	Protein S100-A8 (Calgranulin-A) (Calprotectin L1L subunit) (Cystic fibrosis antigen) (CFAG) (Leukocyte L1 complex light chain) (Migration inhibitory factor-related protein 8) (MRP-8) (p8) (S100 calcium-binding protein A8) (Urinary stone protein band A)
P06702	S100A9 CAGB CFAG MRP14	Protein S100-A9 (Calgranulin-B) (Calprotectin L1H subunit) (Leukocyte L1 complex heavy chain) (Migration inhibitory factor-related protein 14) (MRP-14) (p14) (S100 calcium-binding protein A9)
P04271	S100B	Protein S100-B (S-100 protein beta chain) (S-100 protein subunit beta) (S100 calcium-binding protein B)
F8VZH8	UNC13A	Protein unc-13 homolog A
F8W059	UNC13A	Protein unc-13 homolog A
F8W0P6	UNC13A	Protein unc-13 homolog A
Q9UPW8	UNC13A KIAA1032	Protein unc-13 homolog A (Munc13-1)
A0A1B0GVW8	UNC13B	Protein unc-13 homolog B
A0A1B0GUS7	UNC13B	Protein unc-13 homolog B
F8W8M9	UNC13B	Protein unc-13 homolog B
B1AM27	UNC13B	Protein unc-13 homolog B
O14795	UNC13B UNC13	Protein unc-13 homolog B (Munc13-2) (munc13)
I6L9J0	UNC13B	Protein unc-13 homolog B (UNC13B protein)
Q8NB66	UNC13C	Protein unc-13 homolog C (Munc13-3)
P15498	VAV1 VAV	Proto-oncogene vav
A0A0A0MR07	VAV1	Proto-oncogene vav
F5H5P4	VAV1	Proto-oncogene vav
Q96D37	VAV1	Proto-oncogene vav (VAV1 protein)
Q5VUJ5	AGAP7P AGAP7 CTGLF4	Putative Arf-GAP with GTPase, ANK repeat and PH domain-containing protein 7 (AGAP-7) (Arf-GAP with GTPase, ANK repeat and PH domain-containing protein 7 pseudogene) (Centaurin-gamma-like family member 4)
Q6P158	DHX57	Putative ATP-dependent RNA helicase DHX57 (EC 3.6.4.13) (DEAH box protein 57)
A6NGD5	ZSCAN5C ZSCAN5CP	Putative zinc finger and SCAN domain-containing protein 5C (Zinc finger and SCAN domain-containing protein 5C pseudogene)
P0CG00	ZSCAN5DP ZSCAN5D	Putative zinc finger and SCAN domain-containing protein 5D (Zinc finger and SCAN domain-containing protein 5D pseudogene)
Q92670	ZNF75CP ZNF75C	Putative zinc finger protein 75C (Zinc finger protein 75C pseudogene)
Q9P2R3	ANKFY1 ANKHZN KIAA1255	Rabankyrin-5 (Rank-5) (Ankyrin repeat and FYVE domain-containing protein 1) (Ankyrin repeats hooked to a zinc finger motif)
F8VP47	RPH3A	Rabphilin-3A
Q9Y2J0	RPH3A KIAA0985	Rabphilin-3A (Exophilin-1)
P04049	RAF1 RAF	RAF proto-oncogene serine/threonine-protein kinase (EC 2.7.11.1) (Proto-oncogene c-RAF) (cRaf) (Raf-1)
H7C155	RAF1	RAF proto-oncogene serine/threonine-protein kinase (Fragment)
Q9NS23	RASSF1 RDA32	Ras association domain-containing protein 1
A0A075B763	RASSF5	Ras association domain-containing protein 5
Q8WWW0	RASSF5 NORE1 RAPL	Ras association domain-containing protein 5 (New ras effector 1) (Regulator for cell adhesion and polarization enriched in lymphoid tissues) (RAPL)
A0A0A0MSJ9	RASA2	Ras GTPase-activating protein 2
Q15283	RASA2 GAP1M RASGAP	Ras GTPase-activating protein 2 (GTPase-activating protein 1m) (GAP1m)
Q14644	RASA3	Ras GTPase-activating protein 3 (GAP1(IP4BP)) (Ins P4-binding protein)
E7ERK1	RASA4	Ras GTPase-activating protein 4
O43374	RASA4 CAPRI GAPL KIAA0538	Ras GTPase-activating protein 4 (Calcium-promoted Ras inactivator) (Ras p21 protein activator 4) (RasGAP-activating-like protein 2)
C9J798	RASA4B	Ras GTPase-activating protein 4B
F5GXT2	RASA4B	Ras GTPase-activating protein 4B
F8W6L0	RASA4B	Ras GTPase-activating protein 4B
O95294	RASAL1 RASAL	RasGAP-activating-like protein 1 (RAS protein activator like 1) (Ras GTPase-activating-like protein)
Q15493	RGN SMP30	Regucalcin (RC) (Gluconolactonase) (GNL) (EC 3.1.1.17) (Senescence marker protein 30) (SMP-30)
Q86UR5	RIMS1 KIAA0340 RAB3IP2 RIM1 Nbla00761	Regulating synaptic membrane exocytosis protein 1 (Rab-3-interacting molecule 1) (RIM 1) (Rab-3-interacting protein 2)
A0A0J9YWD4	RIMS2	Regulating synaptic membrane exocytosis protein 2 (Fragment)
Q9UQ26	RIMS2 KIAA0751 RAB3IP3 RIM2	Regulating synaptic membrane exocytosis protein 2 (Rab-3-interacting molecule 2) (RIM 2) (Rab-3-interacting protein 3)
J3KSJ4	RARA	Retinoic acid receptor alpha (Fragment)
P10276	RARA NR1B1	Retinoic acid receptor alpha (RAR-alpha) (Nuclear receptor subfamily 1 group B member 1)
A8MUP8	RARA hCG_2007196	Retinoic acid receptor alpha (Retinoic acid receptor, alpha, isoform CRA_e)
D6RBI3	RARB	Retinoic acid receptor beta (Fragment)
P10826	RARB HAP NR1B2	Retinoic acid receptor beta (RAR-beta) (HBV-activated protein) (Nuclear receptor subfamily 1 group B member 2) (RAR-epsilon)
P13631	RARG NR1B3	Retinoic acid receptor gamma (RAR-gamma) (Nuclear receptor subfamily 1 group B member 3)
P19793	RXRA NR2B1	Retinoic acid receptor RXR-alpha (Nuclear receptor subfamily 2 group B member 1) (Retinoid X receptor alpha)
A0A0G2JKR7	RXRB	Retinoic acid receptor RXR-beta
P28702	RXRB NR2B2	Retinoic acid receptor RXR-beta (Nuclear receptor subfamily 2 group B member 2) (Retinoid X receptor beta)
A0A087WZ88	RXRG	Retinoic acid receptor RXR-gamma
P48443	RXRG NR2B3	Retinoic acid receptor RXR-gamma (Nuclear receptor subfamily 2 group B member 3) (Retinoid X receptor gamma)
Q8N8U3	RTL3 MAR3 MART3 ZCCHC5	Retrotransposon Gag-like protein 3 (Zinc finger CCHC domain-containing protein 5)
A0A087WZG4	ARHGEF18	Rho guanine nucleotide exchange factor 18 (Fragment)
V9GYM8	ARHGEF2	Rho guanine nucleotide exchange factor 2
Q92974	ARHGEF2 KIAA0651 LFP40	Rho guanine nucleotide exchange factor 2 (Guanine nucleotide exchange factor H1) (GEF-H1) (Microtubule-regulated Rho-GEF) (Proliferating cell nucleolar antigen p40)
Q8N1W1	ARHGEF28 KIAA1998 RGNEF	Rho guanine nucleotide exchange factor 28 (190 kDa guanine nucleotide exchange factor) (p190-RhoGEF) (p190RhoGEF) (Rho guanine nucleotide exchange factor)
Q13464	ROCK1	Rho-associated protein kinase 1 (EC 2.7.11.1) (Renal carcinoma antigen NY-REN-35) (Rho-associated, coiled-coil-containing protein kinase 1) (Rho-associated, coiled-coil-containing protein kinase I) (ROCK-I) (p160 ROCK-1) (p160ROCK)
E9PF63	ROCK2	Rho-associated protein kinase 2
O75116	ROCK2 KIAA0619	Rho-associated protein kinase 2 (EC 2.7.11.1) (Rho kinase 2) (Rho-associated, coiled-coil-containing protein kinase 2) (Rho-associated, coiled-coil-containing protein kinase II) (ROCK-II) (p164 ROCK-2)
P08100	RHO OPN2	Rhodopsin (Opsin-2)
Q9H0A6	RNF32 FKSG33 HSD15	RING finger protein 32
E9PES2	RNF32	RING finger protein 32 (Fragment)
G5E940	RNF32 hCG_18857	RING finger protein 32 (Ring finger protein 32, isoform CRA_a)
Q9BWF3	RBM4 RBM4A	RNA-binding protein 4 (Lark homolog) (hLark) (RNA-binding motif protein 4) (RNA-binding motif protein 4a)
Q9BQ04	RBM4B RBM30	RNA-binding protein 4B (RNA-binding motif protein 30) (RNA-binding motif protein 4B) (RNA-binding protein 30)
F8WEA1	SRSF7	Serine/arginine-rich-splicing factor 7
A0A0B4J1Z1	SRSF7 SFRS7 hCG_15878	Serine/arginine-rich-splicing factor 7 (Splicing factor, arginine/serine-rich 7, 35kDa, isoform CRA_a)
F8WBA3	PRKD1	Serine/threonine-protein kinase (EC 2.7.11.13)
P10398	ARAF ARAF1 PKS PKS2	Serine/threonine-protein kinase A-Raf (EC 2.7.11.1) (Proto-oncogene A-Raf) (Proto-oncogene A-Raf-1) (Proto-oncogene Pks)
H7C560	BRAF	Serine/threonine-protein kinase B-raf
P15056	BRAF BRAF1 RAFB1	Serine/threonine-protein kinase B-raf (EC 2.7.11.1) (Proto-oncogene B-Raf) (p94) (v-Raf murine sarcoma viral oncogene homolog B1)
Q15139	PRKD1 PKD PKD1 PRKCM	Serine/threonine-protein kinase D1 (EC 2.7.11.13) (Protein kinase C mu type) (Protein kinase D) (nPKC-D1) (nPKC-mu)
Q9BZL6	PRKD2 PKD2 HSPC187	Serine/threonine-protein kinase D2 (EC 2.7.11.13) (nPKC-D2)
O94806	PRKD3 EPK2 PRKCN	Serine/threonine-protein kinase D3 (EC 2.7.11.13) (Protein kinase C nu type) (Protein kinase EPK2) (nPKC-nu)
Q5VT25	CDC42BPA KIAA0451	Serine/threonine-protein kinase MRCK alpha (EC 2.7.11.1) (CDC42-binding protein kinase alpha) (DMPK-like alpha) (Myotonic dystrophy kinase-related CDC42-binding kinase alpha) (MRCK alpha) (Myotonic dystrophy protein kinase-like alpha)
Q9Y5S2	CDC42BPB KIAA1124	Serine/threonine-protein kinase MRCK beta (EC 2.7.11.1) (CDC42-binding protein kinase beta) (CDC42BP-beta) (DMPK-like beta) (Myotonic dystrophy kinase-related CDC42-binding kinase beta) (MRCK beta) (Myotonic dystrophy protein kinase-like beta)
Q6DT37	CDC42BPG DMPK2	Serine/threonine-protein kinase MRCK gamma (EC 2.7.11.1) (CDC42-binding protein kinase gamma) (DMPK-like gamma) (Myotonic dystrophy kinase-related CDC42-binding kinase gamma) (MRCK gamma) (MRCKG) (Myotonic dystrophy protein kinase-like gamma) (Myotonic dystrophy protein kinase-like alpha)
Q08209	PPP3CA CALNA CNA	Serine/threonine-protein phosphatase 2B catalytic subunit alpha isoform (EC 3.1.3.16) (CAM-PRP catalytic subunit) (Calmodulin-dependent calcineurin A subunit alpha isoform)
P16298	PPP3CB CALNA2 CALNB CNA2	Serine/threonine-protein phosphatase 2B catalytic subunit beta isoform (EC 3.1.3.16) (CAM-PRP catalytic subunit) (Calmodulin-dependent calcineurin A subunit beta isoform) (CNA beta)
P48454	PPP3CC CALNA3 CNA3	Serine/threonine-protein phosphatase 2B catalytic subunit gamma isoform (EC 3.1.3.16) (CAM-PRP catalytic subunit) (Calcineurin, testis-specific catalytic subunit) (Calmodulin-dependent calcineurin A subunit gamma isoform)
P17405	SMPD1 ASM	Sphingomyelin phosphodiesterase (EC 3.1.4.12) (Acid sphingomyelinase) (aSMase)
Q15637	SF1 ZFM1 ZNF162	Splicing factor 1 (Mammalian branch point-binding protein) (BBP) (mBBP) (Transcription factor ZFM1) (Zinc finger gene in MEN1 locus) (Zinc finger protein 162)
O95630	STAMBP AMSH	STAM-binding protein (EC 3.4.19.-) (Associated molecule with the SH3 domain of STAM) (Endosome-associated ubiquitin isopeptidase)
P11474	ESRRA ERR1 ESRL1 NR3B1	Steroid hormone receptor ERR1 (Estrogen receptor-like 1) (Estrogen-related receptor alpha) (ERR-alpha) (Nuclear receptor subfamily 3 group B member 1)
F5GWT5	ESRRA	Steroid hormone receptor ERR1 (Fragment)
E7EWD9	ESRRB	Steroid hormone receptor ERR2
O95718	ESRRB ERRB2 ESRL2 NR3B2	Steroid hormone receptor ERR2 (ERR beta-2) (Estrogen receptor-like 2) (Estrogen-related receptor beta) (ERR-beta) (Nuclear receptor subfamily 3 group B member 2)
Q5T6F6	NR5A1	Steroidogenic factor 1 (Fragment)
Q13285	NR5A1 AD4BP FTZF1 SF1	Steroidogenic factor 1 (SF-1) (STF-1) (hSF-1) (Adrenal 4-binding protein) (Fushi tarazu factor homolog 1) (Nuclear receptor subfamily 5 group A member 1) (Steroid hormone receptor Ad4BP)
F1DAM0	NR5A1	Steroidogenic factor 1 nuclear receptor
Q96C24	SYTL4	Synaptotagmin-like protein 4 (Exophilin-2) (Granuphilin)
Q8TDW5	SYTL5 SLP5	Synaptotagmin-like protein 5
O95271	TNKS PARP5A PARPL TIN1 TINF1 TNKS1	Tankyrase-1 (TANK1) (EC 2.4.2.30) (ADP-ribosyltransferase diphtheria toxin-like 5) (ARTD5) (Poly [ADP-ribose] polymerase 5A) (TNKS-1) (TRF1-interacting ankyrin-related ADP-ribose polymerase) (Tankyrase I)
Q9H2K2	TNKS2 PARP5B TANK2 TNKL	Tankyrase-2 (TANK2) (EC 2.4.2.30) (ADP-ribosyltransferase diphtheria toxin-like 6) (ARTD6) (Poly [ADP-ribose] polymerase 5B) (TNKS-2) (TRF1-interacting ankyrin-related ADP-ribose polymerase 2) (Tankyrase II) (Tankyrase-like protein) (Tankyrase-related protein)
A0A0C4DFM7	TUT4	Terminal uridylyltransferase 4
H0YDJ1	TUT4	Terminal uridylyltransferase 4 (Fragment)
H0YEE8	TUT4	Terminal uridylyltransferase 4 (Fragment)
Q5TAX3	TUT4 KIAA0191 ZCCHC11	Terminal uridylyltransferase 4 (TUTase 4) (EC 2.7.7.52) (Zinc finger CCHC domain-containing protein 11)
X6R3Q3	TUT7	Terminal uridylyltransferase 7
A0A0C4DFW3	TUT7	Terminal uridylyltransferase 7
Q5VYS8	TUT7 HS2 KIAA1711 ZCCHC6	Terminal uridylyltransferase 7 (TUTase 7) (EC 2.7.7.52) (Zinc finger CCHC domain-containing protein 6)
J3QRA9	THRA	Thyroid hormone receptor alpha (Fragment)
P10827	THRA EAR7 ERBA1 NR1A1 THRA1 THRA2	Thyroid hormone receptor alpha (Nuclear receptor subfamily 1 group A member 1) (V-erbA-related protein 7) (EAR-7) (c-erbA-1) (c-erbA-alpha)
C9JNQ4	THRB	Thyroid hormone receptor beta (Fragment)
P10828	THRB ERBA2 NR1A2 THR1	Thyroid hormone receptor beta (Nuclear receptor subfamily 1 group A member 2) (c-erbA-2) (c-erbA-beta)
O43897	TLL1 TLL	Tolloid-like protein 1 (EC 3.4.24.-)
Q9Y6L7	TLL2 KIAA0932	Tolloid-like protein 2 (EC 3.4.24.-)
A0A087WTE5	EBF1	Transcription factor COE1
E5RFQ1	EBF1	Transcription factor COE1
Q9UH73	EBF1 COE1 EBF	Transcription factor COE1 (O/E-1) (OE-1) (Early B-cell factor)
Q9HAK2	EBF2 COE2	Transcription factor COE2 (Early B-cell factor 2) (EBF-2)
Q9H4W6	EBF3 COE3	Transcription factor COE3 (Early B-cell factor 3) (EBF-3) (Olf-1/EBF-like 2) (O/E-2) (OE-2)
A0A0A0MSW2	EBF4	Transcription factor COE4
E9PEI2	EBF4	Transcription factor COE4
Q9BQW3	EBF4 COE4 KIAA1442	Transcription factor COE4 (Early B-cell factor 4) (EBF-4) (Olf-1/EBF-like 4) (O/E-4) (OE-4)
X6R549	EBF4	Transcription factor COE4 (Fragment)
V9GYU8	EBF4	Transcription factor COE4 (Fragment)
P46100	ATRX RAD54L XH2	Transcriptional regulator ATRX (EC 3.6.4.12) (ATP-dependent helicase ATRX) (X-linked helicase II) (X-linked nuclear protein) (XNP) (Znf-HX)
Q9C040	TRIM2 KIAA0517 RNF86	Tripartite motif-containing protein 2 (EC 2.3.2.27) (E3 ubiquitin-protein ligase TRIM2) (RING finger protein 86) (RING-type E3 ubiquitin transferase TRIM2)
O75382	TRIM3 BERP RNF22 RNF97	Tripartite motif-containing protein 3 (Brain-expressed RING finger protein) (RING finger protein 22) (RING finger protein 97)
Q8IWZ5	TRIM42	Tripartite motif-containing protein 42
F8W8C1	TRIM67	Tripartite motif-containing protein 67
Q6ZTA4	TRIM67 TNL	Tripartite motif-containing protein 67 (TRIM9-like protein)
U3NG26	BTK	Tyrosine-protein kinase (EC 2.7.10.2)
Q5JY90	BTK hCG_20400	Tyrosine-protein kinase (EC 2.7.10.2)
Q06187	BTK AGMX1 ATK BPK	Tyrosine-protein kinase BTK (EC 2.7.10.2) (Agammaglobulinemia tyrosine kinase) (ATK) (B-cell progenitor kinase) (BPK) (Bruton tyrosine kinase)
Q08881	ITK EMT LYK	Tyrosine-protein kinase ITK/TSK (EC 2.7.10.2) (Interleukin-2-inducible T-cell kinase) (IL-2-inducible T-cell kinase) (Kinase EMT) (T-cell-specific kinase) (Tyrosine-protein kinase Lyk)
P42680	TEC PSCTK4	Tyrosine-protein kinase Tec (EC 2.7.10.2)
P62979	RPS27A UBA80 UBCEP1	Ubiquitin-40S ribosomal protein S27a (Ubiquitin carboxyl extension protein 80) [Cleaved into: Ubiquitin; 40S ribosomal protein S27a (Small ribosomal subunit protein eS31)]
H3BRD5	MYO9A	Unconventional myosin-IXa
B2RTY4	MYO9A MYR7	Unconventional myosin-IXa (Unconventional myosin-9a)
M0R0P8	MYO9B	Unconventional myosin-IXb
Q13459	MYO9B MYR5	Unconventional myosin-IXb (Unconventional myosin-9b)
Q5T097	UTRN	Utrophin
P46939	UTRN DMDL DRP1	Utrophin (Dystrophin-related protein 1) (DRP-1)
F8VXQ9	VDR	Vitamin D3 receptor
F8VPF8	VDR	Vitamin D3 receptor (Fragment)
F8VRJ4	VDR	Vitamin D3 receptor (Fragment)
F8VVY8	VDR	Vitamin D3 receptor (Fragment)
P11473	VDR NR1I1	Vitamin D3 receptor (VDR) (1,25-dihydroxyvitamin D3 receptor) (Nuclear receptor subfamily 1 group I member 1)
Q14191	WRN RECQ3 RECQL2	Werner syndrome ATP-dependent helicase (EC 3.6.4.12) (DNA helicase, RecQ-like type 3) (RecQ3) (Exonuclease WRN) (EC 3.1.-.-) (RecQ protein-like 2)
O75554	WBP4 FBP21 FNBP21	WW domain-binding protein 4 (WBP-4) (Formin-binding protein 21) (WW domain-containing-binding protein 4)
Q8NBB4	ZSCAN1	Zinc finger and SCAN domain-containing protein 1
I3L1J3	ZSCAN10	Zinc finger and SCAN domain-containing protein 10
Q96SZ4	ZSCAN10 ZNF206	Zinc finger and SCAN domain-containing protein 10 (Zinc finger protein 206)
O43309	ZSCAN12 KIAA0426 ZNF305 ZNF96	Zinc finger and SCAN domain-containing protein 12 (Zinc finger protein 305) (Zinc finger protein 96)
Q9H4T2	ZSCAN16 ZNF392 ZNF435	Zinc finger and SCAN domain-containing protein 16 (Zinc finger protein 392) (Zinc finger protein 435)
Q8TBC5	ZSCAN18 ZNF447	Zinc finger and SCAN domain-containing protein 18 (Zinc finger protein 447)
A0A0C4DFQ3	ZSCAN2	Zinc finger and SCAN domain-containing protein 2
Q7Z7L9	ZSCAN2 ZFP29 ZNF854	Zinc finger and SCAN domain-containing protein 2 (Zinc finger protein 29 homolog) (Zfp-29) (Zinc finger protein 854)
P17040	ZSCAN20 KOX29 ZNF31 ZNF360	Zinc finger and SCAN domain-containing protein 20 (Zinc finger protein 31) (Zinc finger protein 360) (Zinc finger protein KOX29)
G3V1M0	ZSCAN21 DKFZp686H10254	Zinc finger and SCAN domain-containing protein 21
Q9Y5A6	ZSCAN21 ZFP38 ZNF38	Zinc finger and SCAN domain-containing protein 21 (Renal carcinoma antigen NY-REN-21) (Zinc finger protein 38 homolog) (Zfp-38)
P10073	ZSCAN22 HKR2 ZNF50	Zinc finger and SCAN domain-containing protein 22 (Krueppel-related zinc finger protein 2) (Protein HKR2) (Zinc finger protein 50)
Q3MJ62	ZSCAN23 ZNF390 ZNF453	Zinc finger and SCAN domain-containing protein 23 (Zinc finger protein 390) (Zinc finger protein 453)
A0A0C4DFN0	ZSCAN25	Zinc finger and SCAN domain-containing protein 25
Q6NSZ9	ZSCAN25 ZNF498	Zinc finger and SCAN domain-containing protein 25 (Zinc finger protein 498)
Q16670	ZSCAN26 ZNF187	Zinc finger and SCAN domain-containing protein 26 (Protein SRE-ZBP) (Zinc finger protein 187)
A0A024RCN4	ZSCAN26 ZNF187 hCG_31430	Zinc finger and SCAN domain-containing protein 26 (Zinc finger protein 187, isoform CRA_a)
A0A0C4DGM2	ZSCAN29	Zinc finger and SCAN domain-containing protein 29
Q8IWY8	ZSCAN29 ZNF690	Zinc finger and SCAN domain-containing protein 29 (Zinc finger protein 690)
Q86W11	ZSCAN30 ZNF397OS	Zinc finger and SCAN domain-containing protein 30 (ZNF-WYM) (Zinc finger protein 397 opposite strand) (Zinc finger protein 397OS)
Q96LW9	ZSCAN31 ZNF310P ZNF323	Zinc finger and SCAN domain-containing protein 31 (Zinc finger protein 323)
Q9NX65	ZSCAN32 ZNF434 HCCS5	Zinc finger and SCAN domain-containing protein 32 (Human cervical cancer suppressor gene 5 protein) (HCCS-5) (Zinc finger protein 434)
Q8NAM6	ZSCAN4 ZNF494	Zinc finger and SCAN domain-containing protein 4 (Zinc finger protein 494)
A0A0C4DGQ1	ZSCAN5A	Zinc finger and SCAN domain-containing protein 5A
Q9BUG6	ZSCAN5A ZNF495 ZSCAN5	Zinc finger and SCAN domain-containing protein 5A (Zinc finger protein 495)
A6NJL1	ZSCAN5B	Zinc finger and SCAN domain-containing protein 5B
O15535	ZSCAN9 ZNF193 PIG12	Zinc finger and SCAN domain-containing protein 9 (Cell proliferation-inducing gene 12 protein) (PRD51) (Zinc finger protein 193)
E9PQL7	ZSCAN9	Zinc finger and SCAN domain-containing protein 9 (Fragment)
Q9UGR2	ZC3H7B KIAA1031	Zinc finger CCCH domain-containing protein 7B (Rotavirus 'X'-associated non-structural protein) (RoXaN)
Q8WW36	ZCCHC13	Zinc finger CCHC domain-containing protein 13
Q8WYQ9	ZCCHC14 KIAA0579	Zinc finger CCHC domain-containing protein 14 (BDG-29)
H3BS18	ZCCHC14	Zinc finger CCHC domain-containing protein 14 (Fragment)
Q9C0B9	ZCCHC2 C18orf49 KIAA1744	Zinc finger CCHC domain-containing protein 2
K7ERQ9	ZCCHC2	Zinc finger CCHC domain-containing protein 2 (Fragment)
K7ESN2	ZCCHC2	Zinc finger CCHC domain-containing protein 2 (Fragment)
Q9NUD5	ZCCHC3 C20orf99	Zinc finger CCHC domain-containing protein 3
Q8N3Z6	ZCCHC7 HSPC086	Zinc finger CCHC domain-containing protein 7 (TRAMP-like complex RNA-binding factor ZCCHC7)
Q6NZY4	ZCCHC8	Zinc finger CCHC domain-containing protein 8 (TRAMP-like complex RNA-binding factor ZCCHC8)
Q8N567	ZCCHC9	Zinc finger CCHC domain-containing protein 9
G3V1V1	ZCRB1 hCG_1818570	Zinc finger CCHC-type and RNA binding motif 1, isoform CRA_b (Zinc finger CCHC-type and RNA-binding motif-containing protein 1)
F8VXY6	ZCRB1	Zinc finger CCHC-type and RNA-binding motif-containing protein 1 (Fragment)
Q8TBF4	ZCRB1	Zinc finger CCHC-type and RNA-binding motif-containing protein 1 (U11/U12 small nuclear ribonucleoprotein 31 kDa protein) (U11/U12 snRNP 31 kDa protein) (U11/U12-31K)
P49910	ZNF165 ZPF165 ZSCAN7	Zinc finger protein 165 (Cancer/testis antigen 53) (CT53) (LD65) (Zinc finger and SCAN domain-containing protein 7)
Q15697	ZNF174 ZSCAN8	Zinc finger protein 174 (AW-1) (Zinc finger and SCAN domain-containing protein 8)
P17022	ZNF18 HDSG1 KOX11 ZKSCAN6 ZNF535	Zinc finger protein 18 (Heart development-specific gene 1 protein) (Zinc finger protein 535) (Zinc finger protein KOX11) (Zinc finger protein with KRAB and SCAN domains 6)
O14709	ZNF197 ZKSCAN9 ZNF166	Zinc finger protein 197 (Zinc finger protein with KRAB and SCAN domains 9) (ZnF20) (pVHL-associated KRAB domain-containing protein)
O95125	ZNF202 ZKSCAN10	Zinc finger protein 202 (Zinc finger protein with KRAB and SCAN domains 10)
O14771	ZNF213 ZKSCAN21	Zinc finger protein 213 (Putative transcription factor CR53) (Zinc finger protein with KRAB and SCAN domains 21)
Q9UL58	ZNF215 BAZ2 ZKSCAN11	Zinc finger protein 215 (BWSCR2-associated zinc finger protein 2) (BAZ-2) (Zinc finger protein with KRAB and SCAN domains 11)
I3L4J6	ZNF232	Zinc finger protein 232
Q9UNY5	ZNF232 ZSCAN11	Zinc finger protein 232 (Zinc finger and SCAN domain-containing protein 11)
P17028	ZNF24 KOX17 ZNF191 ZSCAN3	Zinc finger protein 24 (Retinoic acid suppression protein A) (RSG-A) (Zinc finger and SCAN domain-containing protein 3) (Zinc finger protein 191) (Zinc finger protein KOX17)
O14978	ZNF263 FPM315 ZKSCAN12	Zinc finger protein 263 (Zinc finger protein FPM315) (Zinc finger protein with KRAB and SCAN domains 12)
Q9HBT7	ZNF287 ZKSCAN13	Zinc finger protein 287 (Zinc finger protein with KRAB and SCAN domains 13)
Q53GI3	ZNF394 ZKSCAN14	Zinc finger protein 394 (Zinc finger protein with KRAB and SCAN domains 14)
Q96N95	ZNF396 ZSCAN14	Zinc finger protein 396 (Zinc finger and SCAN domain-containing protein 14)
Q8NF99	ZNF397 ZNF47 ZSCAN15	Zinc finger protein 397 (Zinc finger and SCAN domain-containing protein 15) (Zinc finger protein 47)
Q8N0Y2	ZNF444 EZF2 ZSCAN17	Zinc finger protein 444 (Endothelial zinc finger protein 2) (EZF-2) (Zinc finger and SCAN domain-containing protein 17)
P59923	ZNF445 ZKSCAN15 ZNF168	Zinc finger protein 445 (Zinc finger protein 168) (Zinc finger protein with KRAB and SCAN domains 15)
M0R202	ZNF446	Zinc finger protein 446
A0A087WUM8	ZNF446	Zinc finger protein 446
A0A0B4J2G2	ZNF446	Zinc finger protein 446
Q9NWS9	ZNF446 ZKSCAN20	Zinc finger protein 446 (Zinc finger protein with KRAB and SCAN domains 20)
Q6P9G9	ZNF449 ZSCAN19	Zinc finger protein 449 (Zinc finger and SCAN domain-containing protein 19)
Q8TF39	ZNF483 KIAA1962 ZKSCAN16	Zinc finger protein 483 (Zinc finger protein with KRAB and SCAN domains 16)
Q96IT1	ZNF496 ZKSCAN17	Zinc finger protein 496 (Zinc finger protein with KRAB and SCAN domains 17)
O60304	ZNF500 KIAA0557 ZKSCAN18	Zinc finger protein 500 (Zinc finger protein with KRAB and SCAN domains 18)
Q9UJL9	ZFP69B ZNF643	Zinc finger protein 69 homolog B (Zinc finger protein 643)
P51815	ZNF75D ZNF75 ZNF82	Zinc finger protein 75D (Zinc finger protein 75) (Zinc finger protein 82)
E9PC66	ZKSCAN1	Zinc finger protein with KRAB and SCAN domains 1
P17029	ZKSCAN1 KOX18 ZNF139 ZNF36	Zinc finger protein with KRAB and SCAN domains 1 (Zinc finger protein 139) (Zinc finger protein 36) (Zinc finger protein KOX18)
Q63HK3	ZKSCAN2 ZNF694	Zinc finger protein with KRAB and SCAN domains 2 (Zinc finger protein 694)
Q9BRR0	ZKSCAN3 ZFP47 ZNF306 ZNF309 ZSCAN13	Zinc finger protein with KRAB and SCAN domains 3 (Zinc finger and SCAN domain-containing protein 13) (Zinc finger protein 306) (Zinc finger protein 309) (Zinc finger protein 47 homolog) (Zf47) (Zfp-47)
Q969J2	ZKSCAN4 ZNF307 ZNF427	Zinc finger protein with KRAB and SCAN domains 4 (P373c6.1) (Zinc finger protein 307) (Zinc finger protein 427)
Q9Y2L8	ZKSCAN5 KIAA1015 ZFP95	Zinc finger protein with KRAB and SCAN domains 5 (Zinc finger protein 95 homolog) (Zfp-95)
Q9P0L1	ZKSCAN7 ZNF167 ZNF448 ZNF64	Zinc finger protein with KRAB and SCAN domains 7 (Zinc finger protein 167) (Zinc finger protein 448) (Zinc finger protein 64)
Q15776	ZKSCAN8 ZNF192	Zinc finger protein with KRAB and SCAN domains 8 (LD5-1) (Zinc finger protein 192)
Q9H777	ELAC1 D29	Zinc phosphodiesterase ELAC protein 1 (EC 3.1.26.11) (Deleted in Ma29) (ElaC homolog protein 1) (Ribonuclease Z 1) (RNase Z 1) (tRNA 3 endonuclease 1) (tRNase Z 1)
Q9BQ52	ELAC2 HPC2	Zinc phosphodiesterase ELAC protein 2 (EC 3.1.26.11) (ElaC homolog protein 2) (Heredity prostate cancer protein 2) (Ribonuclease Z 2) (RNase Z 2) (tRNA 3 endonuclease 2) (tRNase Z 2)
Q9Y6M5	SLC30A1 ZNT1	Zinc transporter 1 (ZnT-1) (Solute carrier family 30 member 1)
Q6XR72	SLC30A10 ZNT10 ZNT8	Zinc transporter 10 (ZnT-10) (Manganese transporter SLC30A10) (Solute carrier family 30 member 10)
Q9BRI3	SLC30A2 ZNT2	Zinc transporter 2 (ZnT-2) (Solute carrier family 30 member 2)
Q99726	SLC30A3 ZNT3	Zinc transporter 3 (ZnT-3) (Solute carrier family 30 member 3)
O14863	SLC30A4 ZNT4	Zinc transporter 4 (ZnT-4) (Solute carrier family 30 member 4)
Q8TAD4	SLC30A5 ZNT5 ZNTL1 ZTL1 UNQ863/PRO1879	Zinc transporter 5 (ZnT-5) (Solute carrier family 30 member 5) (ZnT-like transporter 1) (hZTL1)
Q6NXT4	SLC30A6 ZNT6	Zinc transporter 6 (ZnT-6) (Solute carrier family 30 member 6)
Q8NEW0	SLC30A7 ZNT7 ZNTL2	Zinc transporter 7 (ZnT-7) (Solute carrier family 30 member 7) (Znt-like transporter 2)
Q8IWU4	SLC30A8 ZNT8	Zinc transporter 8 (ZnT-8) (Solute carrier family 30 member 8)
Q6PML9	SLC30A9 C4orf1 HUEL	Zinc transporter 9 (ZnT-9) (Human embryonic lung protein) (HuEL) (Solute carrier family 30 member 9)
Q401N2	ZACN L2 LGICZ LGICZ1 ZAC	Zinc-activated ligand-gated ion channel (Ligand-gated ion channel zinc-activated 1) (Ligand-gated ion-channel receptor L2)

## Sheet: Ca_proteins in Hg
Entry	Gene names	Protein names
Q15493	RGN SMP30	Regucalcin (RC) (Gluconolactonase) (GNL) (EC 3.1.1.17) (Senescence marker protein 30) (SMP-30)
P02549	SPTA1 SPTA	Spectrin alpha chain, erythrocytic 1 (Erythroid alpha-spectrin)
Q13425	SNTB2 D16S2531E SNT2B2 SNTL	Beta-2-syntrophin (59 kDa dystrophin-associated protein A1 basic component 2) (Syntrophin-3) (SNT3) (Syntrophin-like) (SNTL)
O43581	SYT7 PCANAP7	Synaptotagmin-7 (IPCA-7) (Prostate cancer-associated protein 7) (Synaptotagmin VII) (SytVII)
Q86SS6	SYT9	Synaptotagmin-9 (Synaptotagmin IX) (SytIX)
Q9H4F8	SMOC1	SPARC-related modular calcium-binding protein 1 (Secreted modular calcium-binding protein 1) (SMOC-1)
P04271	S100B	Protein S100-B (S-100 protein beta chain) (S-100 protein subunit beta) (S100 calcium-binding protein B)
P35247	SFTPD COLEC7 PSPD SFTP4	Pulmonary surfactant-associated protein D (PSP-D) (SP-D) (Collectin-7) (Lung surfactant protein D)
P26447	S100A4 CAPL MTS1	Protein S100-A4 (Calvasculin) (Metastasin) (Placental calcium-binding protein) (Protein Mts1) (S100 calcium-binding protein A4)
P29034	S100A2 S100L	Protein S100-A2 (CAN19) (Protein S-100L) (S100 calcium-binding protein A2)
P25815	S100P S100E	Protein S100-P (Migration-inducing gene 9 protein) (MIG9) (Protein S100-E) (S100 calcium-binding protein P)
Q8IWL2	SFTPA1 COLEC4 PSAP SFTP1 SFTPA SFTPA1B	Pulmonary surfactant-associated protein A1 (PSP-A) (PSPA) (SP-A) (SP-A1) (35 kDa pulmonary surfactant-associated protein) (Alveolar proteinosis protein) (Collectin-4)
Q96FQ6	S100A16 S100F AAG13	Protein S100-A16 (Aging-associated gene 13 protein) (Protein S100-F) (S100 calcium-binding protein A16)
P06703	S100A6 CACY	Protein S100-A6 (Calcyclin) (Growth factor-inducible protein 2A9) (MLN 4) (Prolactin receptor-associated protein) (PRA) (S100 calcium-binding protein A6)
P23297	S100A1 S100A	Protein S100-A1 (S-100 protein alpha chain) (S-100 protein subunit alpha) (S100 calcium-binding protein A1)
P05109	S100A8 CAGA CFAG MRP8	Protein S100-A8 (Calgranulin-A) (Calprotectin L1L subunit) (Cystic fibrosis antigen) (CFAG) (Leukocyte L1 complex light chain) (Migration inhibitory factor-related protein 8) (MRP-8) (p8) (S100 calcium-binding protein A8) (Urinary stone protein band A)
Q13424	SNTA1 SNT1	Alpha-1-syntrophin (59 kDa dystrophin-associated protein A1 acidic component 1) (Pro-TGF-alpha cytoplasmic domain-interacting protein 1) (TACIP1) (Syntrophin-1)
Q13813	SPTAN1 NEAS SPTA2	Spectrin alpha chain, non-erythrocytic 1 (Alpha-II spectrin) (Fodrin alpha chain) (Spectrin, non-erythroid alpha subunit)
P80511	S100A12	Protein S100-A12 (CGRP) (Calcium-binding protein in amniotic fluid 1) (CAAF1) (Calgranulin-C) (CAGC) (Extracellular newly identified RAGE-binding protein) (EN-RAGE) (Migration inhibitory factor-related protein 6) (MRP-6) (p6) (Neutrophil S100 protein) (S100 calcium-binding protein A12) [Cleaved into: Calcitermin]
Q8IWL1	SFTPA2 COLEC5 PSAP SFTP1 SFTPA SFTPA2B	Pulmonary surfactant-associated protein A2 (PSP-A) (PSPA) (SP-A) (SP-A2) (35 kDa pulmonary surfactant-associated protein) (Alveolar proteinosis protein) (Collectin-5)
P06702	S100A9 CAGB CFAG MRP14	Protein S100-A9 (Calgranulin-B) (Calprotectin L1H subunit) (Leukocyte L1 complex heavy chain) (Migration inhibitory factor-related protein 14) (MRP-14) (p14) (S100 calcium-binding protein A9)
P23634	ATP2B4 ATP2B2 MXRA1	Plasma membrane calcium-transporting ATPase 4 (PMCA4) (EC 3.6.3.8) (Matrix-remodeling-associated protein 1) (Plasma membrane calcium ATPase isoform 4) (Plasma membrane calcium pump isoform 4)
O43745	CHP2 HCA520	Calcineurin B homologous protein 2 (Hepatocellular carcinoma-associated antigen 520)
Q8WXI8	CLEC4D CLECSF8 MCL	C-type lectin domain family 4 member D (C-type lectin superfamily member 8) (C-type lectin-like receptor 6) (CLEC-6)
Q9Y6Z7	COLEC10 CLL1 UNQ366/PRO702	Collectin-10 (Collectin liver protein 1) (CL-L1) (Collectin-34) (CL-34)
Q9NYQ6	CELSR1 CDHF9 FMI2	Cadherin EGF LAG seven-pass G-type receptor 1 (Cadherin family member 9) (Flamingo homolog 2) (hFmi2)
Q8TER0	SNED1	Sushi, nidogen and EGF-like domain-containing protein 1 (Insulin-responsive sequence DNA-binding protein 1) (IRE-BP1)
Q9BQG1	SYT3	Synaptotagmin-3 (Synaptotagmin III) (SytIII)
P33763	S100A5 S100D	Protein S100-A5 (Protein S-100D) (S100 calcium-binding protein A5)
Q86SG5	S100A7A S100A15 S100A7L1	Protein S100-A7A (S100 calcium-binding protein A15) (S100 calcium-binding protein A7-like 1) (S100 calcium-binding protein A7A)
O75185	ATP2C2 KIAA0703 SPCA2	Calcium-transporting ATPase type 2C member 2 (ATPase 2C2) (EC 3.6.3.8) (Secretory pathway Ca(2+)-ATPase 2)
Q6ZS10	CLEC17A	C-type lectin domain family 17, member A (Prolectin)
Q9H2X3	CLEC4M CD209L CD209L1 CD299	C-type lectin domain family 4 member M (CD209 antigen-like protein 1) (DC-SIGN-related protein) (DC-SIGNR) (Dendritic cell-specific ICAM-3-grabbing non-integrin 2) (DC-SIGN2) (Liver/lymph node-specific ICAM-3-grabbing non-integrin) (L-SIGN) (CD antigen CD299)
Q99653	CHP1 CHP	Calcineurin B homologous protein 1 (Calcineurin B-like protein) (Calcium-binding protein CHP) (Calcium-binding protein p22) (EF-hand calcium-binding domain-containing protein p22)
Q9ULY5	CLEC4E CLECSF9 MINCLE UNQ218/PRO244	C-type lectin domain family 4 member E (C-type lectin superfamily member 9) (Macrophage-inducible C-type lectin) (MINCLE)
Q6EIG7	CLEC6A CLECSF10 DECTIN2	C-type lectin domain family 6 member A (C-type lectin superfamily member 10) (Dendritic cell-associated C-type lectin 2) (DC-associated C-type lectin 2) (Dectin-2)
P51801	CLCNKB	Chloride channel protein ClC-Kb (Chloride channel Kb) (ClC-K2)
P51800	CLCNKA	Chloride channel protein ClC-Ka (Chloride channel Ka) (ClC-K1)
A6H8M9	CDHR4 CDH29 UNQ9392/PRO34300	Cadherin-related family member 4 (Cadherin-like protein 29)
P54284	CACNB3 CACNLB3	Voltage-dependent L-type calcium channel subunit beta-3 (CAB3) (Calcium channel voltage-dependent subunit beta 3)
Q9UNI1	CELA1 ELA1	Chymotrypsin-like elastase family member 1 (EC 3.4.21.36) (Elastase-1) (Pancreatic elastase 1)
Q9HCU4	CELSR2 CDHF10 EGFL2 KIAA0279 MEGF3	Cadherin EGF LAG seven-pass G-type receptor 2 (Cadherin family member 10) (Epidermal growth factor-like protein 2) (EGF-like protein 2) (Flamingo homolog 3) (Multiple epidermal growth factor-like domains protein 3) (Multiple EGF-like domains protein 3)
O43707	ACTN4	Alpha-actinin-4 (Non-muscle alpha-actinin 4)
Q9ULB5	CDH7 CDH7L1	Cadherin-7
P57796	CABP4	Calcium-binding protein 4 (CaBP4)
Q8N126	CADM3 IGSF4B NECL1 SYNCAM3 TSLL1 UNQ225/PRO258	Cell adhesion molecule 3 (Brain immunoglobulin receptor) (Immunoglobulin superfamily member 4B) (IgSF4B) (Nectin-like protein 1) (NECL-1) (Synaptic cell adhesion molecule 3) (SynCAM3) (TSLC1-like protein 1) (TSLL1)
Q02641	CACNB1 CACNLB1	Voltage-dependent L-type calcium channel subunit beta-1 (CAB1) (Calcium channel voltage-dependent subunit beta 1)
P33151	CDH5	Cadherin-5 (7B4 antigen) (Vascular endothelial cadherin) (VE-cadherin) (CD antigen CD144)
P63098	PPP3R1 CNA2 CNB	Calcineurin subunit B type 1 (Protein phosphatase 2B regulatory subunit 1) (Protein phosphatase 3 regulatory subunit B alpha isoform 1)
P12830	CDH1 CDHE UVO	Cadherin-1 (CAM 120/80) (Epithelial cadherin) (E-cadherin) (Uvomorulin) (CD antigen CD324) [Cleaved into: E-Cad/CTF1; E-Cad/CTF2; E-Cad/CTF3]
Q8IXH8	CDH26	Cadherin-like protein 26 (Cadherin-like protein VR20)
P55287	CDH11	Cadherin-11 (OSF-4) (Osteoblast cadherin) (OB-cadherin)
P55289	CDH12	Cadherin-12 (Brain cadherin) (BR-cadherin) (Neural type cadherin 2) (N-cadherin 2)
Q08289	CACNB2 CACNLB2 MYSB	Voltage-dependent L-type calcium channel subunit beta-2 (CAB2) (Calcium channel voltage-dependent subunit beta 2) (Lambert-Eaton myasthenic syndrome antigen B) (MYSB)
Q9Y6N8	CDH10	Cadherin-10 (T2-cadherin)
O75309	CDH16 UNQ695/PRO1340	Cadherin-16 (Kidney-specific cadherin) (Ksp-cadherin)
Q12864	CDH17	Cadherin-17 (Intestinal peptide-associated transporter HPT-1) (Liver-intestine cadherin) (LI-cadherin)
Q9H159	CDH19 CDH7L2 UNQ478/PRO941	Cadherin-19
P55290	CDH13 CDHH	Cadherin-13 (Heart cadherin) (H-cadherin) (P105) (Truncated cadherin) (T-cad) (T-cadherin)
P55291	CDH15 CDH14 CDH3	Cadherin-15 (Cadherin-14) (Muscle cadherin) (M-cadherin)
Q13634	CDH18 CDH14	Cadherin-18 (Cadherin-14)
P22223	CDH3 CDHP	Cadherin-3 (Placental cadherin) (P-cadherin)
Q9NZT1	CALML5 CLSP	Calmodulin-like protein 5 (Calmodulin-like skin protein)
Q9HCU0	CD248 CD164L1 TEM1	Endosialin (Tumor endothelial marker 1) (CD antigen CD248)
Q86UP0	CDH24 CDH11L UNQ2834/PRO34009	Cadherin-24
P55285	CDH6	Cadherin-6 (Kidney cadherin) (K-cadherin)
Q96LZ3	PPP3R2 CBLP PPP3RL	Calcineurin subunit B type 2 (Calcineurin B-like protein) (CBLP) (Calcineurin BII) (CNBII) (PPP3R1-like) (Protein phosphatase 2B regulatory subunit 2) (Protein phosphatase 3 regulatory subunit B beta isoform)
P27482	CALML3	Calmodulin-like protein 3 (CaM-like protein) (CLP) (Calmodulin-related protein NB-1)
Q9NZM3	ITSN2 KIAA1256 SH3D1B SWAP	Intersectin-2 (SH3 domain-containing protein 1B) (SH3P18) (SH3P18-like WASP-associated protein)
P05129	PRKCG PKCG	Protein kinase C gamma type (PKC-gamma) (EC 2.7.11.13)
P05771	PRKCB PKCB PRKCB1	Protein kinase C beta type (PKC-B) (PKC-beta) (EC 2.7.11.13)
Q8NDA2	HMCN2	Hemicentin-2
Q15811	ITSN1 ITSN SH3D1A	Intersectin-1 (SH3 domain-containing protein 1A) (SH3P17)
Q96RW7	HMCN1 FIBL6	Hemicentin-1 (Fibulin-6) (FIBL-6)
P43080	GUCA1A C6orf131 GCAP GCAP1 GUCA1	Guanylyl cyclase-activating protein 1 (GCAP 1) (Guanylate cyclase activator 1A)
P84074	HPCA BDR2	Neuron-specific calcium-binding protein hippocalcin (Calcium-binding protein BDR-2)
Q9UM19	HPCAL4	Hippocalcin-like protein 4 (HLP4)
P63316	TNNC1 TNNC	Troponin C, slow skeletal and cardiac muscles (TN-C)
P07478	PRSS2 TRY2 TRYP2	Trypsin-2 (EC 3.4.21.4) (Anionic trypsinogen) (Serine protease 2) (Trypsin II)
Q8NET8	TRPV3	Transient receptor potential cation channel subfamily V member 3 (TrpV3) (Vanilloid receptor-like 3) (VRL-3)
Q8NER1	TRPV1 VR1	Transient receptor potential cation channel subfamily V member 1 (TrpV1) (Capsaicin receptor) (Osm-9-like TRP channel 1) (OTRPC1) (Vanilloid receptor 1)
Q9Y210	TRPC6 TRP6	Short transient receptor potential channel 6 (TrpC6) (Transient receptor protein 6) (TRP-6)
Q07283	TCHH THH THL TRHY	Trichohyalin
Q9HBA0	TRPV4 VRL2 VROAC	Transient receptor potential cation channel subfamily V member 4 (TrpV4) (Osm-9-like TRP channel 4) (OTRPC4) (Transient receptor potential protein 12) (TRP12) (Vanilloid receptor-like channel 2) (Vanilloid receptor-like protein 2) (VRL-2) (Vanilloid receptor-related osmotically-activated channel) (VR-OAC)
Q8NHM4	PRSS3P2 T6 TRY6	Putative trypsin-6 (EC 3.4.21.4) (Serine protease 3 pseudogene 2) (Trypsinogen C)
Q9HCX4	TRPC7 TRP7	Short transient receptor potential channel 7 (TrpC7) (Transient receptor protein 7) (TRP-7) (hTRP7)
P62760	VSNL1 VISL1	Visinin-like protein 1 (VILIP) (VLP-1) (Hippocalcin-like protein 3) (HLP3)
Q9UL62	TRPC5 TRP5	Short transient receptor potential channel 5 (TrpC5) (Transient receptor protein 5) (TRP-5) (hTRP-5) (hTRP5)
Q9Y5S1	TRPV2 VRL	Transient receptor potential cation channel subfamily V member 2 (TrpV2) (Osm-9-like TRP channel 2) (OTRPC2) (Vanilloid receptor-like protein 1) (VRL-1)
Q8WZ42	TTN	Titin (EC 2.7.11.1) (Connectin) (Rhabdomyosarcoma antigen MU-RMS-40.14)
P00734	F2	Prothrombin (EC 3.4.21.5) (Coagulation factor II) [Cleaved into: Activation peptide fragment 1; Activation peptide fragment 2; Thrombin light chain; Thrombin heavy chain]
O43897	TLL1 TLL	Tolloid-like protein 1 (EC 3.4.24.-)
Q9Y6L7	TLL2 KIAA0932	Tolloid-like protein 2 (EC 3.4.24.-)
Q9BQ16	SPOCK3 TICN3 UNQ409/PRO771	Testican-3 (SPARC/osteonectin, CWCV, and Kazal-like domains proteoglycan 3)
Q14393	GAS6 AXLLG	Growth arrest-specific protein 6 (GAS-6) (AXL receptor tyrosine kinase ligand)
P00740	F9	Coagulation factor IX (EC 3.4.21.22) (Christmas factor) (Plasma thromboplastin component) (PTC) [Cleaved into: Coagulation factor IXa light chain; Coagulation factor IXa heavy chain]
P00451	F8 F8C	Coagulation factor VIII (Antihemophilic factor) (AHF) (Procoagulant component) [Cleaved into: Factor VIIIa heavy chain, 200 kDa isoform; Factor VIIIa heavy chain, 92 kDa isoform; Factor VIII B chain; Factor VIIIa light chain]
Q14517	FAT1 CDHF7 FAT	Protocadherin Fat 1 (Cadherin family member 7) (Cadherin-related tumor suppressor homolog) (Protein fat homolog) [Cleaved into: Protocadherin Fat 1, nuclear form]
Q9NYQ8	FAT2 CDHF8 KIAA0811 MEGF1	Protocadherin Fat 2 (hFat2) (Cadherin family member 8) (Multiple epidermal growth factor-like domains protein 1) (Multiple EGF-like domains protein 1)
P00742	F10	Coagulation factor X (EC 3.4.21.6) (Stuart factor) (Stuart-Prower factor) [Cleaved into: Factor X light chain; Factor X heavy chain; Activated factor Xa heavy chain]
Q8TDW7	FAT3 CDHF15 KIAA1989	Protocadherin Fat 3 (hFat3) (Cadherin family member 15) (FAT tumor suppressor homolog 3)
P20930	FLG	Filaggrin
Q5D862	FLG2 IFPS	Filaggrin-2 (FLG-2) (Intermediate filament-associated and psoriasis-susceptibility protein) (Ifapsoriasin)
Q6V0I7	FAT4 CDHF14 FATJ Nbla00548	Protocadherin Fat 4 (hFat4) (Cadherin family member 14) (FAT tumor suppressor homolog 4) (Fat-like cadherin protein FAT-J)
Q02413	DSG1 CDHF4	Desmoglein-1 (Cadherin family member 4) (Desmosomal glycoprotein 1) (DG1) (DGI) (Pemphigus foliaceus antigen)
O75923	DYSF FER1L1	Dysferlin (Dystrophy-associated fer-1-like protein) (Fer-1-like protein 1)
Q14126	DSG2 CDHF5	Desmoglein-2 (Cadherin family member 5) (HDGC)
Q86SJ6	DSG4 CDHF13	Desmoglein-4 (Cadherin family member 13)
Q14183	DOC2A	Double C2-like domain-containing protein alpha (Doc2) (Doc2-alpha)
Q02487	DSC2 CDHF2 DSC3	Desmocollin-2 (Cadherin family member 2) (Desmocollin-3) (Desmosomal glycoprotein II) (Desmosomal glycoprotein III)
Q03001	DST BP230 BP240 BPAG1 DMH DT KIAA0728	Dystonin (230 kDa bullous pemphigoid antigen) (230/240 kDa bullous pemphigoid antigen) (Bullous pemphigoid antigen 1) (BPA) (Bullous pemphigoid antigen) (Dystonia musculorum protein) (Hemidesmosomal plaque protein)
Q08554	DSC1 CDHF1	Desmocollin-1 (Cadherin family member 1) (Desmosomal glycoprotein 2/3) (DG2/DG3)
P16233	PNLIP	Pancreatic triacylglycerol lipase (PL) (PTL) (Pancreatic lipase) (EC 3.1.1.3)
P54317	PNLIPRP2 PLRP2	Pancreatic lipase-related protein 2 (PL-RP2) (EC 3.1.1.26) (EC 3.1.1.3) (Galactolipase)
P17252	PRKCA PKCA PRKACA	Protein kinase C alpha type (PKC-A) (PKC-alpha) (EC 2.7.11.13)
O00187	MASP2	Mannan-binding lectin serine protease 2 (EC 3.4.21.104) (MBL-associated serine protease 2) (Mannose-binding protein-associated serine protease 2) (MASP-2) [Cleaved into: Mannan-binding lectin serine protease 2 A chain; Mannan-binding lectin serine protease 2 B chain]
P14151	SELL LNHR LYAM1	L-selectin (CD62 antigen-like family member L) (Leukocyte adhesion molecule 1) (LAM-1) (Leukocyte surface antigen Leu-8) (Leukocyte-endothelial cell adhesion molecule 1) (LECAM1) (Lymph node homing receptor) (TQ1) (gp90-MEL) (CD antigen CD62L)
Q9UPN3	MACF1 ABP620 ACF7 KIAA0465 KIAA1251	Microtubule-actin cross-linking factor 1, isoforms 1/2/3/5 (620 kDa actin-binding protein) (ABP620) (Actin cross-linking family protein 7) (Macrophin-1) (Trabeculin-alpha)
O14594	NCAN CSPG3 NEUR	Neurocan core protein (Chondroitin sulfate proteoglycan 3)
P61601	NCALD	Neurocalcin-delta
Q14680	MELK KIAA0175	Maternal embryonic leucine zipper kinase (hMELK) (EC 2.7.11.1) (Protein kinase Eg3) (pEg3 kinase) (Protein kinase PK38) (hPK38) (Tyrosine-protein kinase MELK) (EC 2.7.10.2)
P48740	MASP1 CRARF CRARF1 PRSS5	Mannan-binding lectin serine protease 1 (EC 3.4.21.-) (Complement factor MASP-3) (Complement-activating component of Ra-reactive factor) (Mannose-binding lectin-associated serine protease 1) (MASP-1) (Mannose-binding protein-associated serine protease) (Ra-reactive factor serine protease p100) (RaRF) (Serine protease 5) [Cleaved into: Mannan-binding lectin serine protease 1 heavy chain; Mannan-bi…
P16109	SELP GMRP GRMP	P-selectin (CD62 antigen-like family member P) (Granule membrane protein 140) (GMP-140) (Leukocyte-endothelial cell adhesion molecule 3) (LECAM3) (Platelet activation dependent granule-external membrane protein) (PADGEM) (CD antigen CD62P)
Q6DN14	MCTP1	Multiple C2 and transmembrane domain-containing protein 1
Q9UBG0	MRC2 CLEC13E ENDO180 KIAA0709 UPARAP	C-type mannose receptor 2 (C-type lectin domain family 13 member E) (Endocytic receptor 180) (Macrophage mannose receptor 2) (Urokinase-type plasminogen activator receptor-associated protein) (UPAR-associated protein) (Urokinase receptor-associated protein) (CD antigen CD280)
P22897	MRC1 CLEC13D CLEC13DL MRC1L1	Macrophage mannose receptor 1 (MMR) (C-type lectin domain family 13 member D) (C-type lectin domain family 13 member D-like) (Human mannose receptor) (hMR) (Macrophage mannose receptor 1-like protein 1) (CD antigen CD206)
P29120	PCSK1 NEC1	Neuroendocrine convertase 1 (NEC 1) (EC 3.4.21.93) (Prohormone convertase 1) (Proprotein convertase 1) (PC1)
P31949	S100A11 MLN70 S100C	Protein S100-A11 (Calgizzarin) (Metastatic lymph node gene 70 protein) (MLN 70) (Protein S100-C) (S100 calcium-binding protein A11) [Cleaved into: Protein S100-A11, N-terminally processed]
P46531	NOTCH1 TAN1	Neurogenic locus notch homolog protein 1 (Notch 1) (hN1) (Translocation-associated notch protein TAN-1) [Cleaved into: Notch 1 extracellular truncation (NEXT); Notch 1 intracellular domain (NICD)]
P09958	FURIN FUR PACE PCSK3	Furin (EC 3.4.21.75) (Dibasic-processing enzyme) (Paired basic amino acid residue-cleaving enzyme) (PACE)
Q08345	DDR1 CAK EDDR1 NEP NTRK4 PTK3A RTK6 TRKE	Epithelial discoidin domain-containing receptor 1 (Epithelial discoidin domain receptor 1) (EC 2.7.10.1) (CD167 antigen-like family member A) (Cell adhesion kinase) (Discoidin receptor tyrosine kinase) (HGK2) (Mammary carcinoma kinase 10) (MCK-10) (Protein-tyrosine kinase 3A) (Protein-tyrosine kinase RTK-6) (TRK E) (Tyrosine kinase DDR) (Tyrosine-protein kinase CAK) (CD antigen CD167a)
P07306	ASGR1 CLEC4H1	Asialoglycoprotein receptor 1 (ASGP-R 1) (ASGPR 1) (C-type lectin domain family 4 member H1) (Hepatic lectin H1) (HL-1)
P07307	ASGR2 CLEC4H2	Asialoglycoprotein receptor 2 (ASGP-R 2) (ASGPR 2) (C-type lectin domain family 4 member H2) (Hepatic lectin H2) (HL-2)
Q93084	ATP2A3	Sarcoplasmic/endoplasmic reticulum calcium ATPase 3 (SERCA3) (SR Ca(2+)-ATPase 3) (EC 3.6.3.8) (Calcium pump 3)
Q16720	ATP2B3	Plasma membrane calcium-transporting ATPase 3 (PMCA3) (EC 3.6.3.8) (Plasma membrane calcium ATPase isoform 3) (Plasma membrane calcium pump isoform 3)
P98194	ATP2C1 KIAA1347 PMR1L HUSSY-28	Calcium-transporting ATPase type 2C member 1 (ATPase 2C1) (EC 3.6.3.8) (ATP-dependent Ca(2+) pump PMR1)
Q9H4D0	CLSTN2 CS2	Calsyntenin-2 (Alcadein-gamma) (Alc-gamma)
Q9BQT9	CLSTN3 CS3 KIAA0726	Calsyntenin-3 (Alcadein-beta) (Alc-beta)
Q9BWP8	COLEC11 UNQ596/PRO1182	Collectin-11 (Collectin kidney protein 1) (CL-K1)
Q9UMR7	CLEC4A CLECSF6 DCIR LLIR HDCGC13P	C-type lectin domain family 4 member A (C-type lectin DDB27) (C-type lectin superfamily member 6) (Dendritic cell immunoreceptor) (Lectin-like immunoreceptor)
Q9UBG3	CRNN C1orf10 DRC1 PDRC1 SEP53	Cornulin (53 kDa putative calcium-binding protein) (53 kDa squamous epithelial-induced stress protein) (58 kDa heat shock protein) (Squamous epithelial heat shock protein 53) (Tumor-related protein)
Q9P212	PLCE1 KIAA1516 PLCE PPLC	1-phosphatidylinositol 4,5-bisphosphate phosphodiesterase epsilon-1 (EC 3.1.4.11) (Pancreas-enriched phospholipase C) (Phosphoinositide phospholipase C-epsilon-1) (Phospholipase C-epsilon-1) (PLC-epsilon-1)
Q15147	PLCB4	1-phosphatidylinositol 4,5-bisphosphate phosphodiesterase beta-4 (EC 3.1.4.11) (Phosphoinositide phospholipase C-beta-4) (Phospholipase C-beta-4) (PLC-beta-4)
Q4KWH8	PLCH1 KIAA1069 PLCL3	1-phosphatidylinositol 4,5-bisphosphate phosphodiesterase eta-1 (EC 3.1.4.11) (Phosphoinositide phospholipase C-eta-1) (Phospholipase C-eta-1) (PLC-eta-1) (Phospholipase C-like protein 3) (PLC-L3)
P51178	PLCD1	1-phosphatidylinositol 4,5-bisphosphate phosphodiesterase delta-1 (EC 3.1.4.11) (Phosphoinositide phospholipase C-delta-1) (Phospholipase C-III) (PLC-III) (Phospholipase C-delta-1) (PLC-delta-1)
Q9Y5H0	PCDHGA3	Protocadherin gamma-A3 (PCDH-gamma-A3)
O95206	PCDH8	Protocadherin-8 (Arcadlin)
Q9Y5G0	PCDHGB5	Protocadherin gamma-B5 (PCDH-gamma-B5)
Q9UN70	PCDHGC3 PCDH2	Protocadherin gamma-C3 (PCDH-gamma-C3) (Protocadherin-2) (Protocadherin-43) (PC-43)
Q9HCL0	PCDH18 KIAA1562	Protocadherin-18
Q8N6Y1	PCDH20 PCDH13	Protocadherin-20 (Protocadherin-13)
Q9BRC7	PLCD4	1-phosphatidylinositol 4,5-bisphosphate phosphodiesterase delta-4 (hPLCD4) (EC 3.1.4.11) (Phosphoinositide phospholipase C-delta-4) (Phospholipase C-delta-4) (PLC-delta-4)
Q86YW0	PLCZ1	1-phosphatidylinositol 4,5-bisphosphate phosphodiesterase zeta-1 (EC 3.1.4.11) (Phosphoinositide phospholipase C-zeta-1) (Phospholipase C-zeta-1) (PLC-zeta-1) (Testis-development protein NYD-SP27)
Q9Y5H7	PCDHA5 CNRS6	Protocadherin alpha-5 (PCDH-alpha-5)
Q9HC56	PCDH9	Protocadherin-9
Q9Y5F8	PCDHGB7	Protocadherin gamma-B7 (PCDH-gamma-B7)
Q9Y5I3	PCDHA1	Protocadherin alpha-1 (PCDH-alpha-1)
Q15746	MYLK MLCK MLCK1 MYLK1	Myosin light chain kinase, smooth muscle (MLCK) (smMLCK) (EC 2.7.11.18) (Kinase-related protein) (KRP) (Telokin) [Cleaved into: Myosin light chain kinase, smooth muscle, deglutamylated form]
P0C869	PLA2G4B	Cytosolic phospholipase A2 beta (cPLA2-beta) (EC 3.1.1.4) (Phospholipase A2 group IVB)
Q9Y5I4	PCDHAC2	Protocadherin alpha-C2 (PCDH-alpha-C2)
Q7RTY7	OVCH1	Ovochymase-1 (EC 3.4.21.-)
Q9Y5G4	PCDHGA9	Protocadherin gamma-A9 (PCDH-gamma-A9)
Q96JQ0	DCHS1 CDH19 CDH25 FIB1 KIAA1773 PCDH16	Protocadherin-16 (Cadherin-19) (Cadherin-25) (Fibroblast cadherin-1) (Protein dachsous homolog 1)
Q9Y5F7	PCDHGC4	Protocadherin gamma-C4 (PCDH-gamma-C4)
Q96TA0	PCDHB18P PCDHB18	Putative protocadherin beta-18 (PCDH-beta-18) (PCDH-psi2)
Q9UN73	PCDHA6 CNRS2	Protocadherin alpha-6 (PCDH-alpha-6)
Q9Y5E8	PCDHB15	Protocadherin beta-15 (PCDH-beta-15)
Q9UN75	PCDHA12	Protocadherin alpha-12 (PCDH-alpha-12)
Q9Y5H2	PCDHGA11	Protocadherin gamma-A11 (PCDH-gamma-A11)
Q6V1P9	DCHS2 CDH27 CDHJ PCDH23 PCDHJ	Protocadherin-23 (Cadherin-27) (Cadherin-like protein CDHJ) (Cadherin-like protein VR8) (Protein dachsous homolog 2) (Protocadherin PCDHJ)
Q9Y5H8	PCDHA3	Protocadherin alpha-3 (PCDH-alpha-3)
Q9UN71	PCDHGB4 CDH20 FIB2	Protocadherin gamma-B4 (PCDH-gamma-B4) (Cadherin-20) (Fibroblast cadherin-2)
Q08174	PCDH1	Protocadherin-1 (Cadherin-like protein 1) (Protocadherin-42) (PC42)
Q7RTZ1	OVCH2 OVTN	Ovochymase-2 (EC 3.4.21.-) (Oviductin)
Q9Y5G2	PCDHGB2	Protocadherin gamma-B2 (PCDH-gamma-B2)
Q9Y5F6	PCDHGC5	Protocadherin gamma-C5 (PCDH-gamma-C5)
O60245	PCDH7 BHPCDH	Protocadherin-7 (Brain-heart protocadherin) (BH-Pcdh)
Q9UN67	PCDHB10 UNQ1906/PRO4352	Protocadherin beta-10 (PCDH-beta-10)
Q9Y5E9	PCDHB14	Protocadherin beta-14 (PCDH-beta-14)
Q9Y5G5	PCDHGA8 KIAA0327	Protocadherin gamma-A8 (PCDH-gamma-A8)
Q9Y5I0	PCDHA13 CNRS5	Protocadherin alpha-13 (PCDH-alpha-13)
Q9HC10	OTOF FER1L2	Otoferlin (Fer-1-like protein 2)
P47712	PLA2G4A CPLA2 PLA2G4	Cytosolic phospholipase A2 (cPLA2) (Phospholipase A2 group IVA) [Includes: Phospholipase A2 (EC 3.1.1.4) (Phosphatidylcholine 2-acylhydrolase); Lysophospholipase (EC 3.1.1.5)]
O14829	PPEF1 PPEF PPP7C	Serine/threonine-protein phosphatase with EF-hands 1 (PPEF-1) (EC 3.1.3.16) (Protein phosphatase with EF calcium-binding domain) (PPEF) (Serine/threonine-protein phosphatase 7) (PP7)
Q01970	PLCB3	1-phosphatidylinositol 4,5-bisphosphate phosphodiesterase beta-3 (EC 3.1.4.11) (Phosphoinositide phospholipase C-beta-3) (Phospholipase C-beta-3) (PLC-beta-3)
Q00722	PLCB2	1-phosphatidylinositol 4,5-bisphosphate phosphodiesterase beta-2 (EC 3.1.4.11) (Phosphoinositide phospholipase C-beta-2) (Phospholipase C-beta-2) (PLC-beta-2)
Q14651	PLS1	Plastin-1 (Intestine-specific plastin) (I-plastin)
Q9NRD5	PICK1 PRKCABP	PRKCA-binding protein (Protein interacting with C kinase 1) (Protein kinase C-alpha-binding protein)
P13797	PLS3	Plastin-3 (T-plastin)
O14830	PPEF2	Serine/threonine-protein phosphatase with EF-hands 2 (PPEF-2) (EC 3.1.3.16)
P04070	PROC	Vitamin K-dependent protein C (EC 3.4.21.69) (Anticoagulant protein C) (Autoprothrombin IIA) (Blood coagulation factor XIV) [Cleaved into: Vitamin K-dependent protein C light chain; Vitamin K-dependent protein C heavy chain; Activation peptide]
P07225	PROS1 PROS	Vitamin K-dependent protein S
P22891	PROZ	Vitamin K-dependent protein Z
Q9UGM1	CHRNA9 NACHRA9	Neuronal acetylcholine receptor subunit alpha-9 (Nicotinic acetylcholine receptor subunit alpha-9) (NACHR alpha-9)
P35609	ACTN2	Alpha-actinin-2 (Alpha-actinin skeletal muscle isoform 2) (F-actin cross-linking protein)
Q08043	ACTN3	Alpha-actinin-3 (Alpha-actinin skeletal muscle isoform 3) (F-actin cross-linking protein)
P12814	ACTN1	Alpha-actinin-1 (Alpha-actinin cytoskeletal isoform) (F-actin cross-linking protein) (Non-muscle alpha-actinin-1)
P19961	AMY2B	Alpha-amylase 2B (EC 3.2.1.1) (1,4-alpha-D-glucan glucanohydrolase 2B) (Carcinoid alpha-amylase)
P04745	AMY1A AMY1; AMY1B AMY1; AMY1C AMY1	Alpha-amylase 1 (EC 3.2.1.1) (1,4-alpha-D-glucan glucanohydrolase 1) (Salivary alpha-amylase)
P16615	ATP2A2 ATP2B	Sarcoplasmic/endoplasmic reticulum calcium ATPase 2 (SERCA2) (SR Ca(2+)-ATPase 2) (EC 3.6.3.8) (Calcium pump 2) (Calcium-transporting ATPase sarcoplasmic reticulum type, slow twitch skeletal muscle isoform) (Endoplasmic reticulum class 1/2 Ca(2+) ATPase)
P20020	ATP2B1 PMCA1	Plasma membrane calcium-transporting ATPase 1 (PMCA1) (EC 3.6.3.8) (Plasma membrane calcium ATPase isoform 1) (Plasma membrane calcium pump isoform 1)
Q92626	PXDN KIAA0230 MG50 PRG2 VPO VPO1	Peroxidasin homolog (EC 1.11.1.7) (Melanoma-associated antigen MG50) (Vascular peroxidase 1) (p53-responsive gene 2 protein)
P98160	HSPG2	Basement membrane-specific heparan sulfate proteoglycan core protein (HSPG) (Perlecan) (PLC) [Cleaved into: Endorepellin; LG3 peptide]
A1KZ92	PXDNL VPO2	Peroxidasin-like protein (EC 1.11.1.7) (Cardiac peroxidase) (Vascular peroxidase 2) (polysomal ribonuclease 1) (PRM1)
A0A1B0GW24	CABP2	Calcium-binding protein 2
R4GN98	S100A6	Protein S100 (S100 calcium-binding protein) (Fragment)
E7ERY9	ATP2B1	Calcium-transporting ATPase (EC 3.6.3.8)
F5H5X9	CDH7	Cadherin-7
F6QMI7	DST	Dystonin
B9DI82	PLCH2	Phosphoinositide phospholipase C (EC 3.1.4.11) (Fragment)
H3BUU9	CDH11	Cadherin-11
A2A3E3	PCDH15	Protocadherin-15
H3BVI7	CDH1	Cadherin-1
H0YBK2	FAT2	Protocadherin Fat 2 (Fragment)
X6R3Y6	CDH8	Cadherin-8
E5RJT3	CDH17	Cadherin-17 (Fragment)
H0Y7R9	CELSR1	Cadherin EGF LAG seven-pass G-type receptor 1 (Fragment)
B1AVV0	CDH23	Cadherin-23
A0A087WYR8	CDH23	Cadherin-23
Q8N5B3	CDH23	CDH23 protein (Cadherin-23)
B7ZM79	PCDH9	PCDH9 protein (Protocadherin-9)
E5RG14	CALB1	Calbindin (Fragment)
A0A140T9R5	NOTCH4	NOTCH4 (Neurogenic locus notch homolog protein 4)
D6RF86	CDH6	Cadherin-6
A0A0G2JRA4	CDH4	Cadherin-4 (Fragment)
Q5Y7D3	HLA-DQB1	HLA class II histocompatibility antigen, DQ beta 1 chain (MHC class II antigen)
A0A1U9X989	NOTCH4	NOTCH4 (Neurogenic locus notch homolog protein 4)
B4DGW9	HPCAL4	cDNA FLJ50758, moderately similar to Hippocalcin-like protein 4
J3KSI6	DSG2	Desmoglein-2
E7EN24	CDH17	Cadherin-17
B4E2Q0	ATP2C1 hCG_14809	Calcium-transporting ATPase (EC 3.6.3.8)
E9PQ73	FAT3	Protocadherin Fat 3
A0A0A0MRC0	DCHS2	Protocadherin-23
A0A096LP94	PCDHB5	Protocadherin beta-5 (Fragment)
A0A087X2C4	PCDH7	Protocadherin-7 (Fragment)
D6RAX3	PCDH1	Protocadherin-1
D6RIG4	PCDH18	Protocadherin-18
C9JVY2	PLS1	Plastin-1 (Fragment)
A0A096LPC0	PCDHB15	Protocadherin beta-15 (Fragment)
A0A087WVF7	ITSN2	Intersectin-2
A0A0A0MSP0	ATP2C2	Calcium-transporting ATPase (EC 3.6.3.8)
D6RIH8	CDH18	Cadherin-18
D6RER2	CDH18	Cadherin-18
G8JLI8	CDH23	Cadherin-23
A0A096LNH7	PCDHB6	Protocadherin beta-6
Q5TBN3	LCP1	Plastin-2 (Fragment)
A0A0A6YYA3	CDHR1	Cadherin-related family member 1 (Fragment)
D3YTA9	PPP3R1	Calcineurin subunit B type 1
A2A3E5	PCDH15	Protocadherin-15
A2A3E8	PCDH15	Protocadherin-15
E9PHM6	DST	Dystonin
I3L1J2	CDH5	Cadherin-5
A0A0A0MQS6	CDH23	Cadherin-23
H0Y390	MACF1	Microtubule-actin cross-linking factor 1, isoforms 1/2/3/5 (Fragment)
A0A087WX17	CDH1	Cadherin-1
E9PE24	VSNL1	Visinin-like protein 1 (Fragment)
D6RA20	PCDHA4	Protocadherin alpha-4
A0A087WTR7	CDH24	Cadherin-24
A0A087WU43	CDH1	Cadherin-1
H3BS77	CAPN3	Calpain-3
A0A087WXI5	CDH1	Cadherin-1
A2A3E6	PCDH15	Protocadherin-15
H3BNC6	CDH1	Cadherin-1
Q5TBN5	LCP1	Plastin-2 (Fragment)
G3V361	CALM1	Calmodulin-1 (Fragment)
C9JA99	PCDHA13	Protocadherin alpha-13
J3KRI5	CDH8	Cadherin-8
A0A0A0MSQ0	PLS3	Plastin-3
C9J0F3	PLS1	Plastin-1 (Fragment)
C9JEA7	PLCD4	Phosphoinositide phospholipase C (EC 3.1.4.11)
F8W9J4	DST	Dystonin
H3BQH2	CDH11	Cadherin-11 (Fragment)
O14827	RASGRF2 GRF2	Ras-specific guanine nucleotide-releasing factor 2 (Ras-GRF2) (Ras guanine nucleotide exchange factor 2)
Q6XPR3	RPTN	Repetin
Q13884	SNTB1 SNT2B1	Beta-1-syntrophin (59 kDa dystrophin-associated protein A1 basic component 1) (DAPA1B) (BSYN2) (Syntrophin-2) (Tax interaction protein 43) (TIP-43)
P09486	SPARC ON	SPARC (Basement-membrane protein 40) (BM-40) (Osteonectin) (ON) (Secreted protein acidic and rich in cysteine)
Q6XYQ8	SYT10	Synaptotagmin-10 (Synaptotagmin X) (SytX)
O00445	SYT5	Synaptotagmin-5 (Synaptotagmin V) (SytV)
Q9H2B2	SYT4 KIAA1342	Synaptotagmin-4 (Synaptotagmin IV) (SytIV)
Q5T7P8	SYT6	Synaptotagmin-6 (Synaptotagmin VI) (SytVI)
Q9H3U7	SMOC2 SMAP2 MSTP117	SPARC-related modular calcium-binding protein 2 (Secreted modular calcium-binding protein 2) (SMOC-2) (Smooth muscle-associated protein 2) (SMAP-2)
Q9HBX9	RXFP1 LGR7	Relaxin receptor 1 (Leucine-rich repeat-containing G-protein coupled receptor 7) (Relaxin family peptide receptor 1)
Q5SY68	S100A7L2 S100A7B	Protein S100-A7-like 2 (S100 calcium-binding protein A7-like 2)
Q8WXG8	S100Z	Protein S100-Z (S100 calcium-binding protein Z)
O76038	SCGN SECRET	Secretagogin
Q8N9I0	SYT2	Synaptotagmin-2 (Synaptotagmin II) (SytII)
Q14515	SPARCL1	SPARC-like protein 1 (High endothelial venule protein) (Hevin) (MAST 9)
P21579	SYT1 SVP65 SYT	Synaptotagmin-1 (Synaptotagmin I) (SytI) (p65)
Q9BT88	SYT11 KIAA0080	Synaptotagmin-11 (Synaptotagmin XI) (SytXI)
P31151	S100A7 PSOR1 S100A7C	Protein S100-A7 (Psoriasin) (S100 calcium-binding protein A7)
Q99584	S100A13	Protein S100-A13 (S100 calcium-binding protein A13)
Q8WTT0	CLEC4C BDCA2 CLECSF11 CLECSF7 DLEC HECL UNQ9361/PRO34150	C-type lectin domain family 4 member C (Blood dendritic cell antigen 2) (BDCA-2) (C-type lectin superfamily member 7) (Dendritic lectin) (CD antigen CD303)
Q9NRD9	DUOX1 DUOX LNOX1 THOX1	Dual oxidase 1 (EC 1.11.1.-) (EC 1.6.3.1) (Large NOX 1) (Long NOX 1) (NADPH thyroid oxidase 1) (Thyroid oxidase 1)
O94985	CLSTN1 CS1 KIAA0911	Calsyntenin-1 (Alcadein-alpha) (Alc-alpha) (Alzheimer-related cadherin-like protein) (Non-classical cadherin XB31alpha) [Cleaved into: Soluble Alc-alpha (SAlc-alpha); CTF1-alpha (C-terminal fragment 1-alpha)]
Q9HBT6	CDH20 CDH7L3	Cadherin-20
Q9NPB3	CABP2	Calcium-binding protein 2 (CaBP2)
Q9NYQ7	CELSR3 CDHF11 EGFL1 FMI1 KIAA0812 MEGF2	Cadherin EGF LAG seven-pass G-type receptor 3 (Cadherin family member 11) (Epidermal growth factor-like protein 1) (EGF-like protein 1) (Flamingo homolog 1) (hFmi1) (Multiple epidermal growth factor-like domains protein 2) (Multiple EGF-like domains protein 2)
P55283	CDH4	Cadherin-4 (Retinal cadherin) (R-CAD) (R-cadherin)
Q9ULU8	CADPS CAPS CAPS1 KIAA1121	Calcium-dependent secretion activator 1 (Calcium-dependent activator protein for secretion 1) (CAPS-1)
P05156	CFI IF	Complement factor I (EC 3.4.21.45) (C3B/C4B inactivator) [Cleaved into: Complement factor I heavy chain; Complement factor I light chain]
P13497	BMP1 PCOLC	Bone morphogenetic protein 1 (BMP-1) (EC 3.4.24.19) (Mammalian tolloid protein) (mTld) (Procollagen C-proteinase) (PCP)
O00305	CACNB4 CACNLB4	Voltage-dependent L-type calcium channel subunit beta-4 (CAB4) (Calcium channel voltage-dependent subunit beta 4)
Q9UJ99	CDH22 C20orf25	Cadherin-22 (Pituitary and brain cadherin) (PB-cadherin)
P19022	CDH2 CDHN NCAD	Cadherin-2 (CDw325) (Neural cadherin) (N-cadherin) (CD antigen CD325)
Q86YS7	C2CD5 CDP138 KIAA0528	C2 domain-containing protein 5 (C2 domain-containing phosphoprotein of 138 kDa)
Q9H251	CDH23 KIAA1774 KIAA1812 UNQ1894/PRO4340	Cadherin-23 (Otocadherin)
P55286	CDH8	Cadherin-8
Q86UW7	CADPS2 CAPS2 KIAA1591	Calcium-dependent secretion activator 2 (Calcium-dependent activator protein for secretion 2) (CAPS-2)
Q9NNX6	CD209 CLEC4L	CD209 antigen (C-type lectin domain family 4 member L) (Dendritic cell-specific ICAM-3-grabbing non-integrin 1) (DC-SIGN) (DC-SIGN1) (CD antigen CD209)
Q9NZU7	CABP1	Calcium-binding protein 1 (CaBP1) (Calbrain) (Caldendrin)
Q9BYE9	CDHR2 PCDH24 PCLKC	Cadherin-related family member 2 (Protocadherin LKC) (PC-LKC) (Protocadherin-24)
Q96JP9	CDHR1 KIAA1775 PCDH21 PRCAD	Cadherin-related family member 1 (Photoreceptor cadherin) (prCAD) (Protocadherin-21)
Q6ZTQ4	CDHR3 CDH28	Cadherin-related family member 3 (Cadherin-like protein 28)
P09871	C1S	Complement C1s subcomponent (EC 3.4.21.42) (C1 esterase) (Complement component 1 subcomponent s) [Cleaved into: Complement C1s subcomponent heavy chain; Complement C1s subcomponent light chain]
Q9ULB4	CDH9	Cadherin-9
Q6P2M8	PNCK	Calcium/calmodulin-dependent protein kinase type 1B (EC 2.7.11.17) (CaM kinase I beta) (CaM kinase IB) (CaM-KI beta) (CaMKI-beta) (Pregnancy up-regulated non-ubiquitously-expressed CaM kinase)
Q8IU85	CAMK1D CAMKID	Calcium/calmodulin-dependent protein kinase type 1D (EC 2.7.11.17) (CaM kinase I delta) (CaM kinase ID) (CaM-KI delta) (CaMKI delta) (CaMKID) (CaMKI-like protein kinase) (CKLiK)
Q16566	CAMK4 CAMK CAMK-GR CAMKIV	Calcium/calmodulin-dependent protein kinase type IV (CaMK IV) (EC 2.7.11.17) (CaM kinase-GR)
P43304	GPD2	Glycerol-3-phosphate dehydrogenase, mitochondrial (GPD-M) (GPDH-M) (EC 1.1.5.3) (mtGPD)
O95843	GUCA1C GCAP3	Guanylyl cyclase-activating protein 3 (GCAP 3) (Guanylate cyclase activator 1C)
P37235	HPCAL1 BDR1	Hippocalcin-like protein 1 (Calcium-binding protein BDR-1) (HLP2) (Visinin-like protein 3) (VILIP-3)
Q86YZ3	HRNR S100A18	Hornerin
Q9NQA5	TRPV5 ECAC1	Transient receptor potential cation channel subfamily V member 5 (TrpV5) (Calcium transport protein 2) (CaT2) (Epithelial calcium channel 1) (ECaC) (ECaC1) (Osm-9-like TRP channel 3) (OTRPC3)
Q9H1D0	TRPV6 ECAC2	Transient receptor potential cation channel subfamily V member 6 (TrpV6) (CaT-like) (CaT-L) (Calcium transport protein 1) (CaT1) (Epithelial calcium channel 2) (ECaC2)
P46939	UTRN DMDL DRP1	Utrophin (Dystrophin-related protein 1) (DRP-1)
P35030	PRSS3 PRSS4 TRY3 TRY4	Trypsin-3 (EC 3.4.21.4) (Brain trypsinogen) (Mesotrypsinogen) (Serine protease 3) (Serine protease 4) (Trypsin III) (Trypsin IV)
P07477	PRSS1 TRP1 TRY1 TRYP1	Trypsin-1 (EC 3.4.21.4) (Beta-trypsin) (Cationic trypsinogen) (Serine protease 1) (Trypsin I) [Cleaved into: Alpha-trypsin chain 1; Alpha-trypsin chain 2]
Q92563	SPOCK2 KIAA0275 TICN2 UNQ269/PRO306	Testican-2 (SPARC/osteonectin, CWCV, and Kazal-like domains proteoglycan 2)
A0FGR9	ESYT3 FAM62C	Extended synaptotagmin-3 (E-Syt3) (Chr3Syt)
P14625	HSP90B1 GRP94 TRA1	Endoplasmin (94 kDa glucose-regulated protein) (GRP-94) (Heat shock protein 90 kDa beta member 1) (Tumor rejection antigen 1) (gp96 homolog)
P06734	FCER2 CD23A CLEC4J FCE2 IGEBF	Low affinity immunoglobulin epsilon Fc receptor (BLAST-2) (C-type lectin domain family 4 member J) (Fc-epsilon-RII) (Immunoglobulin E-binding factor) (Lymphocyte IgE receptor) (CD antigen CD23) [Cleaved into: Low affinity immunoglobulin epsilon Fc receptor membrane-bound form; Low affinity immunoglobulin epsilon Fc receptor soluble form]
Q9BSJ8	ESYT1 FAM62A KIAA0747 MBC2	Extended synaptotagmin-1 (E-Syt1) (Membrane-bound C2 domain-containing protein)
A0FGR8	ESYT2 FAM62B KIAA1228	Extended synaptotagmin-2 (E-Syt2) (Chr2Syt)
P08709	F7	Coagulation factor VII (EC 3.4.21.21) (Proconvertin) (Serum prothrombin conversion accelerator) (SPCA) (Eptacog alfa) [Cleaved into: Factor VII light chain; Factor VII heavy chain]
P12259	F5	Coagulation factor V (Activated protein C cofactor) (Proaccelerin, labile factor) [Cleaved into: Coagulation factor V heavy chain; Coagulation factor V light chain]
Q14184	DOC2B DOC2BL	Double C2-like domain-containing protein beta (Doc2-beta)
Q14574	DSC3 CDHF3 DSC4	Desmocollin-3 (Cadherin family member 3) (Desmocollin-4) (HT-CP)
P32926	DSG3 CDHF6	Desmoglein-3 (130 kDa pemphigus vulgaris antigen) (PVA) (Cadherin family member 6)
P11532	DMD	Dystrophin
Q5H8C1	FREM1 C9orf143 C9orf145 C9orf154	FRAS1-related extracellular matrix protein 1 (Protein QBRICK)
P54315	PNLIPRP1 PLRP1	Inactive pancreatic lipase-related protein 1 (PL-RP1)
Q14703	MBTPS1 KIAA0091 S1P SKI1	Membrane-bound transcription factor site-1 protease (EC 3.4.21.112) (Endopeptidase S1P) (Subtilisin/kexin-isozyme 1) (SKI-1)
Q6DN12	MCTP2	Multiple C2 and transmembrane domain-containing protein 2
P11226	MBL2 COLEC1 MBL	Mannose-binding protein C (MBP-C) (Collectin-1) (MBP1) (Mannan-binding protein) (Mannose-binding lectin)
P14222	PRF1 PFP	Perforin-1 (P1) (Cytolysin) (Lymphocyte pore-forming protein) (PFP)
P16581	SELE ELAM1	E-selectin (CD62 antigen-like family member E) (Endothelial leukocyte adhesion molecule 1) (ELAM-1) (Leukocyte-endothelial cell adhesion molecule 2) (LECAM2) (CD antigen CD62E)
P62166	NCS1 FLUP FREQ	Neuronal calcium sensor 1 (NCS-1) (Frequenin homolog) (Frequenin-like protein) (Frequenin-like ubiquitous protein)
Q9Y2J0	RPH3A KIAA0985	Rabphilin-3A (Exophilin-1)
P33764	S100A3 S100E	Protein S100-A3 (Protein S-100E) (S100 calcium-binding protein A3)
P29377	S100G CABP9K CALB3 S100D	Protein S100-G (Calbindin-D9k) (S100 calcium-binding protein G) (Vitamin D-dependent calcium-binding protein, intestinal) (CABP)
P16112	ACAN AGC1 CSPG1 MSK16	Aggrecan core protein (Cartilage-specific proteoglycan core protein) (CSPCP) (Chondroitin sulfate proteoglycan core protein 1) (Chondroitin sulfate proteoglycan 1) [Cleaved into: Aggrecan core protein 2]
Q5KU26	COLEC12 CLP1 NSR2 SCARA4 SRCL	Collectin-12 (Collectin placenta protein 1) (CL-P1) (hCL-P1) (Nurse cell scavenger receptor 2) (Scavenger receptor class A member 4) (Scavenger receptor with C-type lectin)
Q9Y2W7	KCNIP3 CSEN DREAM KCHIP3	Calsenilin (A-type potassium channel modulatory protein 3) (DRE-antagonist modulator) (DREAM) (Kv channel-interacting protein 3) (KChIP3)
Q9NRD8	DUOX2 LNOX2 THOX2	Dual oxidase 2 (EC 1.11.1.-) (EC 1.6.3.1) (Large NOX 2) (Long NOX 2) (NADH/NADPH thyroid oxidase p138-tox) (NADPH oxidase/peroxidase DUOX2) (NADPH thyroid oxidase 2) (Thyroid oxidase 2) (p138 thyroid oxidase)
P13611	VCAN CSPG2	Versican core protein (Chondroitin sulfate proteoglycan core protein 2) (Chondroitin sulfate proteoglycan 2) (Glial hyaluronate-binding protein) (GHAP) (Large fibroblast proteoglycan) (PG-M)
Q9Y5F0	PCDHB13 UNQ332/PRO531	Protocadherin beta-13 (PCDH-beta-13)
O75038	PLCH2 KIAA0450 PLCL4	1-phosphatidylinositol 4,5-bisphosphate phosphodiesterase eta-2 (EC 3.1.4.11) (Phosphoinositide phospholipase C-eta-2) (Phosphoinositide phospholipase C-like 4) (PLC-L4) (Phospholipase C-like protein 4) (Phospholipase C-eta-2) (PLC-eta2)
Q9Y5H1	PCDHGA2	Protocadherin gamma-A2 (PCDH-gamma-A2)
Q9Y5G7	PCDHGA6	Protocadherin gamma-A6 (PCDH-gamma-A6)
Q9Y5I1	PCDHA11 CNRS7	Protocadherin alpha-11 (PCDH-alpha-11)
Q9Y5G3	PCDHGB1	Protocadherin gamma-B1 (PCDH-gamma-B1)
O14917	PCDH17 PCDH68 PCH68	Protocadherin-17 (Protocadherin-68)
Q9Y5E1	PCDHB9 PCDH3H	Protocadherin beta-9 (PCDH-beta-9) (Protocadherin-3H)
Q9Y5H4	PCDHGA1	Protocadherin gamma-A1 (PCDH-gamma-A1)
Q7L5N7	LPCAT2 AGPAT11 AYTL1	Lysophosphatidylcholine acyltransferase 2 (LPC acyltransferase 2) (LPCAT-2) (LysoPC acyltransferase 2) (EC 2.3.1.23) (1-acylglycerol-3-phosphate O-acyltransferase 11) (1-AGP acyltransferase 11) (1-AGPAT 11) (EC 2.3.1.51) (1-acylglycerophosphocholine O-acyltransferase) (1-alkylglycerophosphocholine O-acetyltransferase) (EC 2.3.1.67) (Acetyl-CoA:lyso-platelet-activating factor acetyltransferase) (A…
Q9H158	PCDHAC1	Protocadherin alpha-C1 (PCDH-alpha-C1)
Q9Y5H6	PCDHA8	Protocadherin alpha-8 (PCDH-alpha-8)
Q9Y5G9	PCDHGA4	Protocadherin gamma-A4 (PCDH-gamma-A4)
Q9Y5I2	PCDHA10 CNRS8	Protocadherin alpha-10 (PCDH-alpha-10)
Q9Y5F9	PCDHGB6	Protocadherin gamma-B6 (PCDH-gamma-B6)
Q9Y5E4	PCDHB5	Protocadherin beta-5 (PCDH-beta-5)
Q9Y5E2	PCDHB7	Protocadherin beta-7 (PCDH-beta-7)
Q9Y5F2	PCDHB11	Protocadherin beta-11 (PCDH-beta-11)
Q9Y5F1	PCDHB12	Protocadherin beta-12 (PCDH-beta-12)
Q9Y6V0	PCLO ACZ KIAA0559	Protein piccolo (Aczonin)
P29122	PCSK6 PACE4	Proprotein convertase subtilisin/kexin type 6 (EC 3.4.21.-) (Paired basic amino acid cleaving enzyme 4) (Subtilisin-like proprotein convertase 4) (SPC4) (Subtilisin/kexin-like protease PACE4)
Q9NRJ7	PCDHB16 KIAA1621 PCDH3X	Protocadherin beta-16 (PCDH-beta-16) (Protocadherin-3X)
Q9UN72	PCDHA7 CNRS4	Protocadherin alpha-7 (PCDH-alpha-7)
Q9BZA7	PCDH11X KIAA1326 PCDH11 PCDHX	Protocadherin-11 X-linked (Protocadherin-11) (Protocadherin on the X chromosome) (PCDH-X) (Protocadherin-S)
Q9Y5G6	PCDHGA7	Protocadherin gamma-A7 (PCDH-gamma-A7)
Q96QU1	PCDH15 USH1F	Protocadherin-15
Q8TAB3	PCDH19 KIAA1313	Protocadherin-19
Q9Y5H9	PCDHA2	Protocadherin alpha-2 (PCDH-alpha-2)
Q9UN66	PCDHB8 PCDH3I	Protocadherin beta-8 (PCDH-beta-8) (Protocadherin-3I)
Q9UN74	PCDHA4	Protocadherin alpha-4 (PCDH-alpha-4)
Q9Y5H3	PCDHGA10	Protocadherin gamma-A10 (PCDH-gamma-A10)
Q9Y5G1	PCDHGB3	Protocadherin gamma-B3 (PCDH-gamma-B3)
Q9Y5E3	PCDHB6	Protocadherin beta-6 (PCDH-beta-6)
Q9Y5H5	PCDHA9 KIAA0345	Protocadherin alpha-9 (PCDH-alpha-9)
Q9Y5E7	PCDHB2	Protocadherin beta-2 (PCDH-beta-2)
Q9Y5E6	PCDHB3	Protocadherin beta-3 (PCDH-beta-3)
Q9Y5G8	PCDHGA5	Protocadherin gamma-A5 (PCDH-gamma-A5)
Q9BZA8	PCDH11Y PCDH11 PCDH22 PCDHY	Protocadherin-11 Y-linked (Protocadherin-11) (Protocadherin on the Y chromosome) (PCDH-Y) (Protocadherin prostate cancer) (Protocadherin-PC) (Protocadherin-22)
O60330	PCDHGA12 CDH21 FIB3 KIAA0588 UNQ371/PRO707	Protocadherin gamma-A12 (PCDH-gamma-A12) (Cadherin-21) (Fibroblast cadherin-3)
Q9Y5F3	PCDHB1	Protocadherin beta-1 (PCDH-beta-1)
Q9Y5E5	PCDHB4	Protocadherin beta-4 (PCDH-beta-4)
Q9P2E7	PCDH10 KIAA1400	Protocadherin-10
Q9NPG4	PCDH12 UNQ395/PRO731	Protocadherin-12 (Vascular cadherin-2) (Vascular endothelial cadherin-2) (VE-cad-2) (VE-cadherin-2) [Cleaved into: Protocadherin-12, secreted form]
Q8NBP7	PCSK9 NARC1 PSEC0052	Proprotein convertase subtilisin/kexin type 9 (EC 3.4.21.-) (Neural apoptosis-regulated convertase 1) (NARC-1) (Proprotein convertase 9) (PC9) (Subtilisin/kexin-like protease PC9)
Q86XP0	PLA2G4D	Cytosolic phospholipase A2 delta (cPLA2-delta) (EC 3.1.1.4) (Phospholipase A2 group IVD)
Q68DD2	PLA2G4F	Cytosolic phospholipase A2 zeta (cPLA2-zeta) (EC 3.1.1.4) (Phospholipase A2 group IVF)
Q3MJ16	PLA2G4E	Cytosolic phospholipase A2 epsilon (cPLA2-epsilon) (EC 3.1.1.4) (Phospholipase A2 group IVE)
Q7Z443	PKD1L3	Polycystic kidney disease protein 1-like 3 (PC1-like 3 protein) (Polycystin-1L3)
P16885	PLCG2	1-phosphatidylinositol 4,5-bisphosphate phosphodiesterase gamma-2 (EC 3.1.4.11) (Phosphoinositide phospholipase C-gamma-2) (Phospholipase C-IV) (PLC-IV) (Phospholipase C-gamma-2) (PLC-gamma-2)
P19174	PLCG1 PLC1	1-phosphatidylinositol 4,5-bisphosphate phosphodiesterase gamma-1 (EC 3.1.4.11) (PLC-148) (Phosphoinositide phospholipase C-gamma-1) (Phospholipase C-II) (PLC-II) (Phospholipase C-gamma-1) (PLC-gamma-1)
Q8N3E9	PLCD3 KIAA1964	1-phosphatidylinositol 4,5-bisphosphate phosphodiesterase delta-3 (EC 3.1.4.11) (Phosphoinositide phospholipase C-delta-3) (Phospholipase C-delta-3) (PLC-delta-3)
P13796	LCP1 PLS2	Plastin-2 (L-plastin) (LC64P) (Lymphocyte cytosolic protein 1) (LCP-1)
Q9GZZ6	CHRNA10 NACHRA10	Neuronal acetylcholine receptor subunit alpha-10 (Nicotinic acetylcholine receptor subunit alpha-10) (NACHR alpha-10)
P04746	AMY2A	Pancreatic alpha-amylase (PA) (EC 3.2.1.1) (1,4-alpha-D-glucan glucanohydrolase)
O14983	ATP2A1	Sarcoplasmic/endoplasmic reticulum calcium ATPase 1 (SERCA1) (SR Ca(2+)-ATPase 1) (EC 3.6.3.8) (Calcium pump 1) (Calcium-transporting ATPase sarcoplasmic reticulum type, fast twitch skeletal muscle isoform) (Endoplasmic reticulum class 1/2 Ca(2+) ATPase)
Q01814	ATP2B2 PMCA2	Plasma membrane calcium-transporting ATPase 2 (PMCA2) (EC 3.6.3.8) (Plasma membrane calcium ATPase isoform 2) (Plasma membrane calcium pump isoform 2)
Q5T7Y6	S100A1 hCG_15470	Protein S100 (S100 calcium-binding protein)
F8VVI9	CDH19	Cadherin-19 (Fragment)
A0A0D9SGF6	SPTAN1	Spectrin alpha chain, non-erythrocytic 1
U3KQI3	PLS3	Plastin-3 (Fragment)
F6U1T9	PPP3R1	Calcineurin subunit B type 1
X6RAN8	DUOX2	Dual oxidase 2
E7EMG0	PCDH15	Protocadherin-15
H0YAH0	PCDH7	Protocadherin-7 (Fragment)
A0A087X250	PCDH15	Protocadherin-15
A2A3E4	PCDH15	Protocadherin-15
A0A0D9SF54	SPTAN1	Spectrin alpha chain, non-erythrocytic 1
A9Z1W1	PCDH15	Protocadherin-15
C9JAM3	PLS1	Plastin-1 (Fragment)
C9J4F3	PCDH15	Protocadherin-15
F5GXS2	ACTN4	Alpha-actinin-4
A2A3E7	PCDH15	Protocadherin-15
E5RIA5	NCALD	Neurocalcin-delta (Fragment)
A0A087WSW8	PCDHA4	Protocadherin alpha-4
A0A087WX99	CDH4	Cadherin-4
J3KTG8	CDH8	Cadherin-8 (Fragment)
A0A087X1T6	PCDH15	Protocadherin-15
J3KTP3	CDH19	Cadherin-19
A0A087WZN9	PCDH15	Protocadherin-15
H0Y3J4	SMOC2	SPARC-related modular calcium-binding protein 2 (Fragment)
A0A096LNH0	DCHS2	Protocadherin-23
A0A140T8Y6	NOTCH4	NOTCH4 (Neurogenic locus notch homolog protein 4)
H7BY79	CDH26	Cadherin-like protein 26 (Fragment)
A0A096LP81	PCDHB16	Protocadherin beta-16 (Fragment)
A0A087WZW3	PCDH15	Protocadherin-15
E7EMG8	PCDH15	Protocadherin-15
Q5VT82	PCDH9 hCG_2026614	Protocadherin-9
H3BQK9	MACF1	Microtubule-actin cross-linking factor 1, isoforms 1/2/3/5
H0YAK3	CDH18	Cadherin-18 (Fragment)
A0A087WZ37	PCDH15	Protocadherin-15
A0A087X097	CDH23	Cadherin-23
B7ZBT8	PCDH15	Protocadherin-15
C9J359	PLS1	Plastin-1 (Fragment)
A0A087WVP1	FAT1	Protocadherin Fat 1
J3QKW5	CDH8	Cadherin-8
A0A087WTR6	PCDH15	Protocadherin-15
A0A0A0MS94	CDH23	Cadherin-23
H0Y9F5	PCDH1	Protocadherin-1 (Fragment)
D6RJG0	CDH10	Cadherin-10
E7ER47	VSNL1	Visinin-like protein 1 (Fragment)
H3BSG2	CDH16	Cadherin-16
R4GN92	CDH23	Cadherin-23 (Fragment)
A0A087WUA8	PCDH15	Protocadherin-15
H3BPE1	MACF1	Microtubule-actin cross-linking factor 1, isoforms 1/2/3/5
H0Y5I1	SMOC2	SPARC-related modular calcium-binding protein 2 (Fragment)
E7EM97	PCDH15	Protocadherin-15
H3BUZ3	CAPN3	Calpain-3 (Fragment)
A2A3E1	PCDH15	Protocadherin-15
A0A087X1P2	PCDHGC3	Protocadherin gamma-C3 (Fragment)
C9JU08	PLS1	Plastin-1 (Fragment)
A0A0A0MTF5	GUCA1A	Guanylyl cyclase-activating protein 1
J3QLE6	CDH8	Cadherin-8
E7EM53	PCDH15	Protocadherin-15
A2A3D8	PCDH15	Protocadherin-15
A0A0A0MRH3	KCNIP3	Calsenilin

## Sheet: Cu_proteins in Hg
Entry	Gene names	Protein names
P05067	APP A4 AD1	Amyloid-beta A4 protein (ABPP) (APPI) (APP) (Alzheimer disease amyloid protein) (Amyloid precursor protein) (Amyloid-beta precursor protein) (Cerebral vascular amyloid peptide) (CVAP) (PreA4) (Protease nexin-II) (PN-II) [Cleaved into: N-APP; Soluble APP-alpha (S-APP-alpha); Soluble APP-beta (S-APP-beta); C99 (Beta-secretase C-terminal fragment) (Beta-CTF); Amyloid-beta protein 42 (Abeta42) (Beta-…
E9PFZ2	CP	Ceruloplasmin
P00450	CP	Ceruloplasmin (EC 1.16.3.1) (Ferroxidase)
H7C5R1	CP	Ceruloplasmin (Fragment)
P12259	F5	Coagulation factor V (Activated protein C cofactor) (Proaccelerin, labile factor) [Cleaved into: Coagulation factor V heavy chain; Coagulation factor V light chain]
O14618	CCS	Copper chaperone for superoxide dismutase (Superoxide dismutase copper chaperone)
O00244	ATOX1 HAH1	Copper transport protein ATOX1 (Metal transport protein ATX1)
Q04656	ATP7A MC1 MNK	Copper-transporting ATPase 1 (EC 3.6.3.54) (Copper pump 1) (Menkes disease-associated protein)
P35670	ATP7B PWD WC1 WND	Copper-transporting ATPase 2 (EC 3.6.3.54) (Copper pump 2) (Wilson disease-associated protein) [Cleaved into: WND/140 kDa]
Q6UVY6	MOXD1 MOX UNQ2493/PRO5780	DBH-like monooxygenase protein 1 (EC 1.14.17.-) (Monooxygenase X)
P09172	DBH	Dopamine beta-hydroxylase (EC 1.14.17.1) (Dopamine beta-monooxygenase) [Cleaved into: Soluble dopamine beta-hydroxylase]
E7ES21	HEPH	Hephaestin
Q9BQS7	HEPH KIAA0698 UNQ2562/PRO6242	Hephaestin (EC 1.-.-.-)
A0A0C4DG76	HEPH hCG_18329	Hephaestin, isoform CRA_c
Q6MZM0	HEPHL1	Hephaestin-like protein 1 (EC 1.-.-.-)
P19021	PAM	Peptidyl-glycine alpha-amidating monooxygenase (PAM) [Includes: Peptidylglycine alpha-hydroxylating monooxygenase (PHM) (EC 1.14.17.3); Peptidyl-alpha-hydroxyglycine alpha-amidating lyase (EC 4.3.2.5) (Peptidylamidoglycolate lyase) (PAL)]
P80511	S100A12	Protein S100-A12 (CGRP) (Calcium-binding protein in amniotic fluid 1) (CAAF1) (Calgranulin-C) (CAGC) (Extracellular newly identified RAGE-binding protein) (EN-RAGE) (Migration inhibitory factor-related protein 6) (MRP-6) (p6) (Neutrophil S100 protein) (S100 calcium-binding protein A12) [Cleaved into: Calcitermin]
Q99584	S100A13	Protein S100-A13 (S100 calcium-binding protein A13)
P33763	S100A5 S100D	Protein S100-A5 (Protein S-100D) (S100 calcium-binding protein A5)
A6NHM9	MOXD2P MOXD2	Putative DBH-like monooxygenase protein 2 (EC 1.14.17.-) (DBH-like monooxygenase protein 2 pseudogene)
P09486	SPARC ON	SPARC (Basement-membrane protein 40) (BM-40) (Osteonectin) (ON) (Secreted protein acidic and rich in cysteine)

## Sheet: Zn_proteins in Pb
Entry	Gene names	Protein names
Q05823	RNASEL RNS4	2-5A-dependent ribonuclease (2-5A-dependent RNase) (EC 3.1.26.-) (Ribonuclease 4) (Ribonuclease L) (RNase L)
Q96II5	ARAF	ARAF protein (Serine/threonine-protein kinase A-Raf)
E7EU13	ARAP1	Arf-GAP with Rho-GAP domain, ANK repeat and PH domain-containing protein 1
Q96P48	ARAP1 CENTD2 KIAA0782	Arf-GAP with Rho-GAP domain, ANK repeat and PH domain-containing protein 1 (Centaurin-delta-2) (Cnt-d2)
Q8WZ64	ARAP2 CENTD1 KIAA0580	Arf-GAP with Rho-GAP domain, ANK repeat and PH domain-containing protein 2 (Centaurin-delta-1) (Cnt-d1) (Protein PARX)
G5E9Y3	ARAP3 CENTD3 hCG_1980706	Arf-GAP with Rho-GAP domain, ANK repeat and PH domain-containing protein 3 (Centaurin, delta 3, isoform CRA_b)
Q8WWN8	ARAP3 CENTD3	Arf-GAP with Rho-GAP domain, ANK repeat and PH domain-containing protein 3 (Centaurin-delta-3) (Cnt-d3)
B3VCF5	CHN2	Beta chimaerin isoform B1-CHNdel ex10-11 (Beta-chimaerin)
B3VCF6	CHN2	Beta chimaerin isoform B1-CHNdel ex11-12 (Beta-chimaerin)
P52757	CHN2 ARHGAP3 BCH	Beta-chimaerin (Beta-chimerin) (Rho GTPase-activating protein 3)
H7C0V3	CHN2	Beta-chimaerin (Fragment)
O14578	CIT CRIK KIAA0949 STK21	Citron Rho-interacting kinase (CRIK) (EC 2.7.11.1) (Serine/threonine-protein kinase 21)
P51813	BMX	Cytoplasmic tyrosine-protein kinase BMX (EC 2.7.10.2) (Bone marrow tyrosine kinase gene in chromosome X protein) (Epithelial and endothelial tyrosine kinase) (ETK) (NTK38)
P13716	ALAD	Delta-aminolevulinic acid dehydratase (ALADH) (EC 4.2.1.24) (Porphobilinogen synthase)
H0YA20	DGKQ	Diacylglycerol kinase (DAG kinase) (EC 2.7.1.107) (Fragment)
P23743	DGKA DAGK DAGK1	Diacylglycerol kinase alpha (DAG kinase alpha) (EC 2.7.1.107) (80 kDa diacylglycerol kinase) (Diglyceride kinase alpha) (DGK-alpha)
Q9Y6T7	DGKB DAGK2 KIAA0718	Diacylglycerol kinase beta (DAG kinase beta) (EC 2.7.1.107) (90 kDa diacylglycerol kinase) (Diglyceride kinase beta) (DGK-beta)
Q16760	DGKD KIAA0145	Diacylglycerol kinase delta (DAG kinase delta) (EC 2.7.1.107) (130 kDa diacylglycerol kinase) (Diglyceride kinase delta) (DGK-delta)
P52429	DGKE DAGK5	Diacylglycerol kinase epsilon (DAG kinase epsilon) (EC 2.7.1.107) (Diglyceride kinase epsilon) (DGK-epsilon)
Q86XP1	DGKH	Diacylglycerol kinase eta (DAG kinase eta) (EC 2.7.1.107) (Diglyceride kinase eta) (DGK-eta)
P49619	DGKG DAGK3	Diacylglycerol kinase gamma (DAG kinase gamma) (EC 2.7.1.107) (Diglyceride kinase gamma) (DGK-gamma)
H7C0L0	DGKG	Diacylglycerol kinase gamma (Fragment)
O75912	DGKI	Diacylglycerol kinase iota (DAG kinase iota) (EC 2.7.1.107) (Diglyceride kinase iota) (DGK-iota)
Q5KSL6	DGKK	Diacylglycerol kinase kappa (DAG kinase kappa) (EC 2.7.1.107) (142 kDa diacylglycerol kinase) (Diglyceride kinase kappa) (DGK-kappa)
P52824	DGKQ DAGK4	Diacylglycerol kinase theta (DAG kinase theta) (EC 2.7.1.107) (Diglyceride kinase theta) (DGK-theta)
Q13574	DGKZ DAGK6	Diacylglycerol kinase zeta (DAG kinase zeta) (EC 2.7.1.107) (Diglyceride kinase zeta) (DGK-zeta)
Q6ZN54	DEF8	Differentially expressed in FDCP 8 homolog (DEF-8)
O95602	POLR1A	DNA-directed RNA polymerase I subunit RPA1 (RNA polymerase I subunit A1) (EC 2.7.7.6) (A190) (DNA-directed RNA polymerase I largest subunit) (DNA-directed RNA polymerase I subunit A) (RNA polymerase I 194 kDa subunit) (RPA194)
Q9H9Y6	POLR1B	DNA-directed RNA polymerase I subunit RPA2 (RNA polymerase I subunit 2) (EC 2.7.7.6) (DNA-directed RNA polymerase I 135 kDa polypeptide) (RPA135)
P24928	POLR2A POLR2	DNA-directed RNA polymerase II subunit RPB1 (RNA polymerase II subunit B1) (EC 2.7.7.6) (DNA-directed RNA polymerase II subunit A) (DNA-directed RNA polymerase III largest subunit) (RNA-directed RNA polymerase II subunit RPB1) (EC 2.7.7.48)
P30876	POLR2B	DNA-directed RNA polymerase II subunit RPB2 (EC 2.7.7.6) (DNA-directed RNA polymerase II 140 kDa polypeptide) (DNA-directed RNA polymerase II subunit B) (RNA polymerase II subunit 2) (RNA polymerase II subunit B2)
O14802	POLR3A	DNA-directed RNA polymerase III subunit RPC1 (RNA polymerase III subunit C1) (EC 2.7.7.6) (DNA-directed RNA polymerase III largest subunit) (DNA-directed RNA polymerase III subunit A) (RNA polymerase III 155 kDa subunit) (RPC155) (RNA polymerase III subunit C160)
Q9NW08	POLR3B	DNA-directed RNA polymerase III subunit RPC2 (RNA polymerase III subunit C2) (EC 2.7.7.6) (C128) (DNA-directed RNA polymerase III 127.6 kDa polypeptide) (DNA-directed RNA polymerase III subunit B)
Q8TBB1	LNX1 LNX PDZRN2 UNQ574/PRO1136	E3 ubiquitin-protein ligase LNX (EC 2.3.2.27) (Ligand of Numb-protein X 1) (Numb-binding protein 1) (PDZ domain-containing RING finger protein 2) (RING-type E3 ubiquitin transferase LNX)
Q9UPQ7	PDZRN3 KIAA1095 LNX3 SEMCAP3	E3 ubiquitin-protein ligase PDZRN3 (EC 2.3.2.27) (Ligand of Numb protein X 3) (PDZ domain-containing RING finger protein 3) (RING-type E3 ubiquitin transferase PDZRN3) (Semaphorin cytoplasmic domain-associated protein 3) (Protein SEMACAP3)
P36406	TRIM23 ARD1 ARFD1 RNF46	E3 ubiquitin-protein ligase TRIM23 (EC 2.3.2.27) (ADP-ribosylation factor domain-containing protein 1) (GTP-binding protein ARD-1) (RING finger protein 46) (RING-type E3 ubiquitin transferase TRIM23) (Tripartite motif-containing protein 23)
P87889	ERVK-10	Endogenous retrovirus group K member 10 Gag polyprotein (HERV-K10 Gag protein) (HERV-K107 Gag protein) (HERV-K_5q33.3 provirus ancestral Gag polyprotein) (Gag polyprotein)
P10266	ERVK-10	Endogenous retrovirus group K member 10 Pol protein (HERV-K10 Pol protein) (HERV-K107 Pol protein) (HERV-K_5q33.3 provirus ancestral Pol protein) [Includes: Reverse transcriptase (RT) (EC 2.7.7.49); Ribonuclease H (RNase H) (EC 3.1.26.4); Integrase (IN)]
Q9UQG0	ERVK-11	Endogenous retrovirus group K member 11 Pol protein (HERV-K_3q27.2 provirus ancestral Pol protein) [Includes: Reverse transcriptase (RT) (EC 2.7.7.49); Ribonuclease H (RNase H) (EC 3.1.26.4); Integrase (IN)]
P62684	HERVK_113	Endogenous retrovirus group K member 113 Gag polyprotein (HERV-K113 Gag protein) (HERV-K_19p13.11 provirus ancestral Gag polyprotein) (Gag polyprotein)
P63132	HERVK_113	Endogenous retrovirus group K member 113 Pol protein (HERV-K113 Pol protein) (HERV-K_19p13.11 provirus ancestral Pol protein) [Includes: Reverse transcriptase (RT) (EC 2.7.7.49); Ribonuclease H (RNase H) (EC 3.1.26.4); Integrase (IN)]
Q9QC07	ERVK-18	Endogenous retrovirus group K member 18 Pol protein (HERV-K(C1a) Pol protein) (HERV-K110 Pol protein) (HERV-K18 Pol protein) (HERV-K_1q23.3 provirus ancestral Pol protein) [Includes: Reverse transcriptase (EC 2.7.7.49); Ribonuclease H (RNase H) (EC 3.1.26.4)]
Q9YNA8	ERVK-19	Endogenous retrovirus group K member 19 Gag polyprotein (HERV-K(C19) Gag protein) (HERV-K_19q11 provirus ancestral Gag polyprotein) (Gag polyprotein)
Q9WJR5	ERVK-19	Endogenous retrovirus group K member 19 Pol protein (HERV-K(C19) Pol protein) (HERV-K_19q11 provirus ancestral Pol protein) [Includes: Reverse transcriptase (RT) (EC 2.7.7.49); Ribonuclease H (RNase H) (EC 3.1.26.4); Integrase (IN)]
P62683	ERVK-21	Endogenous retrovirus group K member 21 Gag polyprotein (HERV-K_12q14.1 provirus ancestral Gag polyprotein) (Gag polyprotein)
P63145	ERVK-24	Endogenous retrovirus group K member 24 Gag polyprotein (HERV-K101 Gag protein) (HERV-K_22q11.21 provirus ancestral Gag polyprotein) (Gag polyprotein)
P63136	ERVK-25	Endogenous retrovirus group K member 25 Pol protein (HERV-K_11q22.1 provirus ancestral Pol protein) [Includes: Reverse transcriptase (RT) (EC 2.7.7.49); Ribonuclease H (RNase H) (EC 3.1.26.4); Integrase (IN)]
Q9HDB9	ERVK-5 ERVK5	Endogenous retrovirus group K member 5 Gag polyprotein (HERV-K(II) Gag protein) (HERV-K_3q12.3 provirus ancestral Gag polyprotein) (Gag polyprotein)
Q7LDI9	ERVK-6 ERVK6	Endogenous retrovirus group K member 6 Gag polyprotein (HERV-K(C7) Gag protein) (HERV-K(HML-2.HOM) Gag protein) (HERV-K108 Gag protein) (HERV-K_7p22.1 provirus ancestral Gag polyprotein) (Gag polyprotein)
Q9BXR3	ERVK-6 ERVK6	Endogenous retrovirus group K member 6 Pol protein (HERV-K(C7) Pol protein) (HERV-K(HML-2.HOM) Pol protein) (HERV-K108 Pol protein) (HERV-K_7p22.1 provirus ancestral Pol protein) [Includes: Reverse transcriptase (RT) (EC 2.7.7.49); Ribonuclease H (RNase H) (EC 3.1.26.4); Integrase (IN)]
P63130	ERVK-7	Endogenous retrovirus group K member 7 Gag polyprotein (HERV-K(III) Gag protein) (HERV-K102 Gag protein) (HERV-K_1q22 provirus ancestral Gag polyprotein) (Gag polyprotein)
P63135	ERVK-7	Endogenous retrovirus group K member 7 Pol protein (HERV-K(III) Pol protein) (HERV-K102 Pol protein) (HERV-K_1q22 provirus ancestral Pol protein) [Includes: Reverse transcriptase (RT) (EC 2.7.7.49); Ribonuclease H (RNase H) (EC 3.1.26.4); Integrase (IN)]
P62685	ERVK-8	Endogenous retrovirus group K member 8 Gag polyprotein (HERV-K115 Gag protein) (HERV-K_8p23.1 provirus ancestral Gag polyprotein) (Gag polyprotein)
P63133	ERVK-8	Endogenous retrovirus group K member 8 Pol protein (HERV-K115 Pol protein) (HERV-K_8p23.1 provirus ancestral Pol protein) [Includes: Reverse transcriptase (RT) (EC 2.7.7.49); Ribonuclease H (RNase H) (EC 3.1.26.4); Integrase (IN)]
P63126	ERVK-9	Endogenous retrovirus group K member 9 Gag polyprotein (HERV-K(C6) Gag protein) (HERV-K109 Gag protein) (HERV-K_6q14.1 provirus ancestral Gag polyprotein) (Gag polyprotein)
P63128	ERVK-9	Endogenous retrovirus group K member 9 Pol protein (HERV-K(C6) Gag-Pol protein) (HERV-K109 Gag-Pol protein) (HERV-K_6q14.1 provirus ancestral Gag-Pol polyprotein) [Includes: Protease (EC 3.4.23.50) (PR) (Retropepsin); Reverse transcriptase/ribonuclease H (EC 2.7.7.49) (EC 2.7.7.7) (EC 3.1.26.4) (p66 RT)]
P52735	VAV2	Guanine nucleotide exchange factor VAV2 (VAV-2)
Q9UKW4	VAV3	Guanine nucleotide exchange factor VAV3 (VAV-3)
Q8IVT5	KSR1 KSR	Kinase suppressor of Ras 1
A0A0A0MQW1	KSR1	Kinase suppressor of Ras 1
E9PB13	KSR2	Kinase suppressor of Ras 2
Q6VAB6	KSR2	Kinase suppressor of Ras 2 (hKSR2) (EC 2.7.11.1)
Q8N448	LNX2 PDZRN1	Ligand of Numb protein X 2 (Numb-binding protein 2) (PDZ domain-containing RING finger protein 1)
E9PC47	LIMK1	LIM domain kinase 1
P53667	LIMK1 LIMK	LIM domain kinase 1 (LIMK-1) (EC 2.7.11.1)
B5MC51	LIMK2	LIM domain kinase 2
P53671	LIMK2	LIM domain kinase 2 (LIMK-2) (EC 2.7.11.1)
J3KP06	LMO7	LIM domain only protein 7
F8WD26	LMO7	LIM domain only protein 7
E9PMS6	LMO7	LIM domain only protein 7
E9PMT2	LMO7	LIM domain only protein 7
Q8WWI1	LMO7 FBX20 FBXO20 KIAA0858	LIM domain only protein 7 (LMO-7) (F-box only protein 20) (LOMP)
O75112	LDB3 KIAA0613 ZASP	LIM domain-binding protein 3 (Protein cypher) (Z-band alternatively spliced PDZ-motif protein)
Q9HBH9	MKNK2 GPRK7 MNK2	MAP kinase-interacting serine/threonine-protein kinase 2 (EC 2.7.11.1) (MAP kinase signal-integrating kinase 2) (MAPK signal-integrating kinase 2) (Mnk2)
M9T4I7	MEX3C	MEX3C variant 2 (RNA-binding E3 ubiquitin-protein ligase MEX3C)
Q13233	MAP3K1 MAPKKK1 MEKK MEKK1	Mitogen-activated protein kinase kinase kinase 1 (EC 2.7.11.25) (MAPK/ERK kinase kinase 1) (MEK kinase 1) (MEKK 1)
B8ZZ96	CHN1	N-chimaerin
P15882	CHN1 ARHGAP2 CHN	N-chimaerin (A-chimaerin) (Alpha-chimerin) (N-chimerin) (NC) (Rho GTPase-activating protein 2)
C9J1N1	CHN1	N-chimaerin (Fragment)
C9J3V9	CHN1	N-chimaerin (Fragment)
C9JR98	CHN1	N-chimaerin (Fragment)
A0A0A0MRJ0	CDC42BPA	Non-specific serine/threonine protein kinase (EC 2.7.11.1)
A0A087WXF8	ZCCHC17	Nucleolar protein of 40 kDa
Q9NP64	ZCCHC17 PS1D HSPC243 HSPC251 LDC4	Nucleolar protein of 40 kDa (pNO40) (Pnn-interacting nucleolar protein) (Putative S1 RNA-binding domain protein) (PS1D protein) (Zinc finger CCHC domain-containing protein 17)
O00151	PDLIM1 CLIM1 CLP36	PDZ and LIM domain protein 1 (C-terminal LIM domain protein 1) (Elfin) (LIM domain protein CLP-36)
A0A087WVI1	PDLIM2	PDZ and LIM domain protein 2
Q96JY6	PDLIM2 PP6345	PDZ and LIM domain protein 2 (PDZ-LIM protein mystique)
A0A087WYF8	PDLIM3	PDZ and LIM domain protein 3
Q53GG5	PDLIM3 ALP	PDZ and LIM domain protein 3 (Actinin-associated LIM protein) (Alpha-actinin-2-associated LIM protein)
P50479	PDLIM4 RIL	PDZ and LIM domain protein 4 (LIM protein RIL) (Reversion-induced LIM protein)
Q96HC4	PDLIM5 ENH L9	PDZ and LIM domain protein 5 (Enigma homolog) (Enigma-like PDZ and LIM domains protein)
Q9NR12	PDLIM7 ENIGMA	PDZ and LIM domain protein 7 (LIM mineralization protein) (LMP) (Protein enigma)
Q8NEN9	PDZD8 PDZK8	PDZ domain-containing protein 8 (Sarcoma antigen NY-SAR-84/NY-SAR-104)
Q6ZMN7	PDZRN4 LNX4 SEMCAP3L	PDZ domain-containing RING finger protein 4 (Ligand of Numb protein X 4) (SEMACAP3-like protein)
Q9NRD5	PICK1 PRKCABP	PRKCA-binding protein (Protein interacting with C kinase 1) (Protein kinase C-alpha-binding protein)
A0A087X0I9	PRKCQ	Protein kinase C (EC 2.7.11.13)
J3KRN5	PRKCA	Protein kinase C alpha type
J3KN97	PRKCA	Protein kinase C alpha type (Fragment)
P17252	PRKCA PKCA PRKACA	Protein kinase C alpha type (PKC-A) (PKC-alpha) (EC 2.7.11.13)
P05771	PRKCB PKCB PRKCB1	Protein kinase C beta type (PKC-B) (PKC-beta) (EC 2.7.11.13)
Q05655	PRKCD	Protein kinase C delta type (EC 2.7.11.13) (Tyrosine-protein kinase PRKCD) (EC 2.7.10.2) (nPKC-delta) [Cleaved into: Protein kinase C delta type regulatory subunit; Protein kinase C delta type catalytic subunit (Sphingosine-dependent protein kinase-1) (SDK1)]
C9K0E3	PRKCD	Protein kinase C delta type (Fragment)
Q02156	PRKCE PKCE	Protein kinase C epsilon type (EC 2.7.11.13) (nPKC-epsilon)
P24723	PRKCH PKCL PRKCL	Protein kinase C eta type (EC 2.7.11.13) (PKC-L) (nPKC-eta)
G3V4Q6	PRKCH	Protein kinase C eta type (Fragment)
G3V4Q9	PRKCH	Protein kinase C eta type (Fragment)
G3V4X4	PRKCH	Protein kinase C eta type (Fragment)
G3V5U5	PRKCH	Protein kinase C eta type (Fragment)
G3V304	PRKCH	Protein kinase C eta type (Fragment)
P05129	PRKCG PKCG	Protein kinase C gamma type (PKC-gamma) (EC 2.7.11.13)
P41743	PRKCI DXS1179E	Protein kinase C iota type (EC 2.7.11.13) (Atypical protein kinase C-lambda/iota) (PRKC-lambda/iota) (aPKC-lambda/iota) (nPKC-iota)
Q04759	PRKCQ PRKCT	Protein kinase C theta type (EC 2.7.11.13) (nPKC-theta)
Q05513	PRKCZ PKC2	Protein kinase C zeta type (EC 2.7.11.13) (nPKC-zeta)
F2Z3C5	PRKCZ	Protein kinase C zeta type (Fragment)
Q9Y6V0	PCLO ACZ KIAA0559	Protein piccolo (Aczonin)
F8W0P6	UNC13A	Protein unc-13 homolog A
F8VZH8	UNC13A	Protein unc-13 homolog A
F8W059	UNC13A	Protein unc-13 homolog A
Q9UPW8	UNC13A KIAA1032	Protein unc-13 homolog A (Munc13-1)
A0A1B0GVW8	UNC13B	Protein unc-13 homolog B
A0A1B0GUS7	UNC13B	Protein unc-13 homolog B
F8W8M9	UNC13B	Protein unc-13 homolog B
B1AM27	UNC13B	Protein unc-13 homolog B
O14795	UNC13B UNC13	Protein unc-13 homolog B (Munc13-2) (munc13)
I6L9J0	UNC13B	Protein unc-13 homolog B (UNC13B protein)
Q8NB66	UNC13C	Protein unc-13 homolog C (Munc13-3)
P15498	VAV1 VAV	Proto-oncogene vav
A0A0A0MR07	VAV1	Proto-oncogene vav
F5H5P4	VAV1	Proto-oncogene vav
Q96D37	VAV1	Proto-oncogene vav (VAV1 protein)
F8VP47	RPH3A	Rabphilin-3A
Q9Y2J0	RPH3A KIAA0985	Rabphilin-3A (Exophilin-1)
Q9H0H5	RACGAP1 KIAA1478 MGCRACGAP	Rac GTPase-activating protein 1 (Male germ cell RacGap) (MgcRacGAP) (Protein CYK4 homolog) (CYK4) (HsCYK-4)
P04049	RAF1 RAF	RAF proto-oncogene serine/threonine-protein kinase (EC 2.7.11.1) (Proto-oncogene c-RAF) (cRaf) (Raf-1)
H7C155	RAF1	RAF proto-oncogene serine/threonine-protein kinase (Fragment)
Q9NS23	RASSF1 RDA32	Ras association domain-containing protein 1
A0A075B763	RASSF5	Ras association domain-containing protein 5
Q8WWW0	RASSF5 NORE1 RAPL	Ras association domain-containing protein 5 (New ras effector 1) (Regulator for cell adhesion and polarization enriched in lymphoid tissues) (RAPL)
A0A0A0MSJ9	RASA2	Ras GTPase-activating protein 2
Q15283	RASA2 GAP1M RASGAP	Ras GTPase-activating protein 2 (GTPase-activating protein 1m) (GAP1m)
Q14644	RASA3	Ras GTPase-activating protein 3 (GAP1(IP4BP)) (Ins P4-binding protein)
E7ERK1	RASA4	Ras GTPase-activating protein 4
O43374	RASA4 CAPRI GAPL KIAA0538	Ras GTPase-activating protein 4 (Calcium-promoted Ras inactivator) (Ras p21 protein activator 4) (RasGAP-activating-like protein 2)
C9J798	RASA4B	Ras GTPase-activating protein 4B
F5GXT2	RASA4B	Ras GTPase-activating protein 4B
F8W6L0	RASA4B	Ras GTPase-activating protein 4B
H0YKM0	RASGRP1	RAS guanyl-releasing protein 1
F5H514	RASGRP1	RAS guanyl-releasing protein 1
O95267	RASGRP1 RASGRP	RAS guanyl-releasing protein 1 (Calcium and DAG-regulated guanine nucleotide exchange factor II) (CalDAG-GEFII) (Ras guanyl-releasing protein)
H0YMF3	RASGRP1	RAS guanyl-releasing protein 1 (Fragment)
Q7LDG7	RASGRP2 CDC25L MCG7	RAS guanyl-releasing protein 2 (Calcium and DAG-regulated guanine nucleotide exchange factor I) (CalDAG-GEFI) (Cdc25-like protein) (hCDC25L) (F25B3.3 kinase-like protein)
Q8IV61	RASGRP3 GRP3 KIAA0846	Ras guanyl-releasing protein 3 (Calcium and DAG-regulated guanine nucleotide exchange factor III) (Guanine nucleotide exchange factor for Rap1)
Q8TDF6	RASGRP4	RAS guanyl-releasing protein 4
O95294	RASAL1 RASAL	RasGAP-activating-like protein 1 (RAS protein activator like 1) (Ras GTPase-activating-like protein)
Q86UR5	RIMS1 KIAA0340 RAB3IP2 RIM1 Nbla00761	Regulating synaptic membrane exocytosis protein 1 (Rab-3-interacting molecule 1) (RIM 1) (Rab-3-interacting protein 2)
A0A0J9YWD4	RIMS2	Regulating synaptic membrane exocytosis protein 2 (Fragment)
Q9UQ26	RIMS2 KIAA0751 RAB3IP3 RIM2	Regulating synaptic membrane exocytosis protein 2 (Rab-3-interacting molecule 2) (RIM 2) (Rab-3-interacting protein 3)
F8VWZ8	ARHGAP29	Rho GTPase-activating protein 29
Q52LW3	ARHGAP29 PARG1	Rho GTPase-activating protein 29 (PTPL1-associated RhoGAP protein 1) (Rho-type GTPase-activating protein 29)
Q8N1W1	ARHGEF28 KIAA1998 RGNEF	Rho guanine nucleotide exchange factor 28 (190 kDa guanine nucleotide exchange factor) (p190-RhoGEF) (p190RhoGEF) (Rho guanine nucleotide exchange factor)
Q13464	ROCK1	Rho-associated protein kinase 1 (EC 2.7.11.1) (Renal carcinoma antigen NY-REN-35) (Rho-associated, coiled-coil-containing protein kinase 1) (Rho-associated, coiled-coil-containing protein kinase I) (ROCK-I) (p160 ROCK-1) (p160ROCK)
E9PF63	ROCK2	Rho-associated protein kinase 2
O75116	ROCK2 KIAA0619	Rho-associated protein kinase 2 (EC 2.7.11.1) (Rho kinase 2) (Rho-associated, coiled-coil-containing protein kinase 2) (Rho-associated, coiled-coil-containing protein kinase II) (ROCK-II) (p164 ROCK-2)
Q5U5Q3	MEX3C RKHD2 RNF194 BM-013	RNA-binding E3 ubiquitin-protein ligase MEX3C (EC 2.3.2.27) (RING finger and KH domain-containing protein 2) (RING finger protein 194) (RING-type E3 ubiquitin transferase MEX3C)
A1L020	MEX3A RKHD4	RNA-binding protein MEX3A (RING finger and KH domain-containing protein 4)
Q6ZN04	MEX3B KIAA2009 RKHD3 RNF195	RNA-binding protein MEX3B (RING finger and KH domain-containing protein 3) (RING finger protein 195)
S4R446	MEX3D	RNA-binding protein MEX3D (Fragment)
Q86XN8	MEX3D KIAA2031 RKHD1 RNF193	RNA-binding protein MEX3D (RING finger and KH domain-containing protein 1) (RING finger protein 193) (TINO)
F8WBA3	PRKD1	Serine/threonine-protein kinase (EC 2.7.11.13)
P10398	ARAF ARAF1 PKS PKS2	Serine/threonine-protein kinase A-Raf (EC 2.7.11.1) (Proto-oncogene A-Raf) (Proto-oncogene A-Raf-1) (Proto-oncogene Pks)
H7C560	BRAF	Serine/threonine-protein kinase B-raf
P15056	BRAF BRAF1 RAFB1	Serine/threonine-protein kinase B-raf (EC 2.7.11.1) (Proto-oncogene B-Raf) (p94) (v-Raf murine sarcoma viral oncogene homolog B1)
Q15139	PRKD1 PKD PKD1 PRKCM	Serine/threonine-protein kinase D1 (EC 2.7.11.13) (Protein kinase C mu type) (Protein kinase D) (nPKC-D1) (nPKC-mu)
F8VZ98	PRKD1	Serine/threonine-protein kinase D1 (Fragment)
Q9BZL6	PRKD2 PKD2 HSPC187	Serine/threonine-protein kinase D2 (EC 2.7.11.13) (nPKC-D2)
O94806	PRKD3 EPK2 PRKCN	Serine/threonine-protein kinase D3 (EC 2.7.11.13) (Protein kinase C nu type) (Protein kinase EPK2) (nPKC-nu)
C9JKP8	PRKD3	Serine/threonine-protein kinase D3 (Fragment)
A0A0A0MRJ1	CDC42BPA	Serine/threonine-protein kinase MRCK alpha
Q5VT25	CDC42BPA KIAA0451	Serine/threonine-protein kinase MRCK alpha (EC 2.7.11.1) (CDC42-binding protein kinase alpha) (DMPK-like alpha) (Myotonic dystrophy kinase-related CDC42-binding kinase alpha) (MRCK alpha) (Myotonic dystrophy protein kinase-like alpha)
H0Y6V3	CDC42BPA	Serine/threonine-protein kinase MRCK alpha (Fragment)
Q9Y5S2	CDC42BPB KIAA1124	Serine/threonine-protein kinase MRCK beta (EC 2.7.11.1) (CDC42-binding protein kinase beta) (CDC42BP-beta) (DMPK-like beta) (Myotonic dystrophy kinase-related CDC42-binding kinase beta) (MRCK beta) (Myotonic dystrophy protein kinase-like beta)
H0YLY0	CDC42BPB	Serine/threonine-protein kinase MRCK beta (Fragment)
Q6DT37	CDC42BPG DMPK2	Serine/threonine-protein kinase MRCK gamma (EC 2.7.11.1) (CDC42-binding protein kinase gamma) (DMPK-like gamma) (Myotonic dystrophy kinase-related CDC42-binding kinase gamma) (MRCK gamma) (MRCKG) (Myotonic dystrophy protein kinase-like gamma) (Myotonic dystrophy protein kinase-like alpha)
Q99469	STAC STAC1	SH3 and cysteine-rich domain-containing protein (Src homology 3 and cysteine-rich domain-containing protein)
Q6ZMT1	STAC2	SH3 and cysteine-rich domain-containing protein 2 (24b2/STAC2) (Src homology 3 and cysteine-rich domain-containing protein 2)
Q96MF2	STAC3	SH3 and cysteine-rich domain-containing protein 3
Q15637	SF1 ZFM1 ZNF162	Splicing factor 1 (Mammalian branch point-binding protein) (BBP) (mBBP) (Transcription factor ZFM1) (Zinc finger gene in MEN1 locus) (Zinc finger protein 162)
Q96C24	SYTL4	Synaptotagmin-like protein 4 (Exophilin-2) (Granuphilin)
Q8TDW5	SYTL5 SLP5	Synaptotagmin-like protein 5
F8VV64	TNS2	Tensin-2
Q63HR2	TNS2 KIAA1075 TENC1	Tensin-2 (EC 3.1.3.-) (C1 domain-containing phosphatase and tensin homolog) (C1-TEN) (Tensin-like C1 domain-containing phosphatase)
U3NG26	BTK	Tyrosine-protein kinase (EC 2.7.10.2)
Q5JY90	BTK hCG_20400	Tyrosine-protein kinase (EC 2.7.10.2)
Q06187	BTK AGMX1 ATK BPK	Tyrosine-protein kinase BTK (EC 2.7.10.2) (Agammaglobulinemia tyrosine kinase) (ATK) (B-cell progenitor kinase) (BPK) (Bruton tyrosine kinase)
Q08881	ITK EMT LYK	Tyrosine-protein kinase ITK/TSK (EC 2.7.10.2) (Interleukin-2-inducible T-cell kinase) (IL-2-inducible T-cell kinase) (Kinase EMT) (T-cell-specific kinase) (Tyrosine-protein kinase Lyk)
P42680	TEC PSCTK4	Tyrosine-protein kinase Tec (EC 2.7.10.2)
H3BRD5	MYO9A	Unconventional myosin-IXa
B2RTY4	MYO9A MYR7	Unconventional myosin-IXa (Unconventional myosin-9a)
M0R0P8	MYO9B	Unconventional myosin-IXb
Q13459	MYO9B MYR5	Unconventional myosin-IXb (Unconventional myosin-9b)

[truncated: 1 more sheets: Ca_proteins in Pb]
